# Supplementary material for: Leveraging Electronic Medical Records from Two Hospital Systems Identifies Male Infertility Associated Comorbidities Across Time
Source: Research Square preprint supplement (doi:10.21203/rs.3.rs-3706493/v1), 2023-12-07
Supplement: Supplementary file 1 [file 06222982a62e09267d7b3dda.xlsx]

## Sheet: before_primary
phenotype	phecode_category	coef_has_phenotype	ci_lb_has_phenotype	ci_ub_has_phenotype	std err_has_phenotype	z_has_phenotype	odds_ratio_has_phenotype	ci_lb_or_has_phenotype	ci_ub_or_has_phenotype	Count_mi	Count_r_mi	Count_con	Count_r_con	pval_has_phenotype	pval_BH_adj_has_phenotype	significance_bh	log10_OR_has_phenotype	-log10_pval_has_phenotype	coef_Intercept	ci_lb_Intercept	ci_ub_Intercept	std err_Intercept	z_Intercept	pval_Intercept	coef_mi_or_vas_est_age	ci_lb_mi_or_vas_est_age	ci_ub_mi_or_vas_est_age	std err_mi_or_vas_est_age	z_mi_or_vas_est_age	pval_mi_or_vas_est_age	converged
Abdominal aortic aneurysm	circulatory system	0.2029	-2.222	2.628	1.237	0.164	1.22495	0.108392	13.8461	10	5541	10	2454	0.869757	0.958318	not_significant	0.0881184	0.060602	2.8614	2.6	3.123	0.133	21.452	0	-0.0513	-0.058	-0.045	0.003	-15.786	0	TRUE
Abdominal hernia	digestive	0.4622	-0.9	1.824	0.695	0.665	1.58756	0.40657	6.1966	10	5541	10	2454	0.506068	0.829862	not_significant	0.200731	0.295791	2.863	2.602	3.125	0.133	21.459	0	-0.0513	-0.058	-0.045	0.003	-15.796	0	TRUE
Abdominal pain	symptoms	-0.2619	-0.42	-0.104	0.08	-3.257	0.769588	0.657047	0.901225	489	5062	287	2177	0.00112656	0.0149832	con_significant	-0.113742	2.94825	2.8699	2.608	3.131	0.133	21.511	0	-0.0508	-0.057	-0.044	0.003	-15.639	0	TRUE
Abnormal arterial blood gases	symptoms	-1.004	-3.526	1.518	1.287	-0.78	0.366411	0.0294224	4.56309	10	5541	10	2454	0.435157	0.775604	not_significant	-0.436032	0.361354	2.8588	2.597	3.12	0.133	21.427	0	-0.0512	-0.058	-0.045	0.003	-15.757	0	TRUE
Abnormal coagulation profile	hematopoietic	1.085	-0.428	2.598	0.772	1.405	2.95944	0.651811	13.4368	14	5537	10	2454	0.159887	0.477551	not_significant	0.47121	0.796186	2.859	2.597	3.121	0.133	21.425	0	-0.0512	-0.058	-0.045	0.003	-15.773	0	TRUE
Abnormal electrocardiogram [ECG] [EKG]	circulatory system	-0.3646	-0.652	-0.077	0.147	-2.488	0.694474	0.521003	0.92589	120	5431	92	2372	0.0128351	0.100416	not_significant	-0.158344	1.8916	2.8436	2.582	3.106	0.134	21.279	0	-0.0506	-0.057	-0.044	0.003	-15.505	0	TRUE
Abnormal findings examination of lungs	respiratory	0.4169	0.066	0.768	0.179	2.327	1.51725	1.06823	2.15545	130	5421	49	2415	0.0199623	0.138121	not_significant	0.181057	1.69979	2.8806	2.619	3.143	0.134	21.552	0	-0.0519	-0.058	-0.046	0.003	-15.935	0	TRUE
Abnormal findings on exam of gastrointestinal tract/ abdominal area	digestive	0.2122	-0.496	0.921	0.361	0.587	1.2364	0.608962	2.5118	31	5520	11	2453	0.557144	0.851726	not_significant	0.0921573	0.254032	2.8602	2.599	3.122	0.133	21.441	0	-0.0512	-0.058	-0.045	0.003	-15.784	0	TRUE
Abnormal findings on study of brain and/or nervous system	neurological	0.275	-1.488	2.038	0.9	0.306	1.31653	0.225824	7.67524	10	5541	10	2454	0.759788	0.92077	not_significant	0.119431	0.119308	2.8622	2.601	3.124	0.133	21.451	0	-0.0513	-0.058	-0.045	0.003	-15.786	0	TRUE
Abnormal function study of cardiovascular system	circulatory system	-0.2617	-1.347	0.823	0.554	-0.473	0.769742	0.260019	2.27732	10	5541	10	2454	0.636384	0.884729	not_significant	-0.113655	0.196281	2.8577	2.596	3.119	0.134	21.397	0	-0.0511	-0.058	-0.045	0.003	-15.725	0	TRUE
Abnormal granulation tissue	dermatologic	-0.772	-2.608	1.064	0.937	-0.824	0.462088	0.0736818	2.89794	10	5541	10	2454	0.409959	0.751486	not_significant	-0.335275	0.38726	2.8637	2.602	3.125	0.133	21.466	0	-0.0513	-0.058	-0.045	0.003	-15.799	0	TRUE
Abnormal heart sounds	circulatory system	-0.1854	-0.779	0.408	0.303	-0.612	0.830772	0.458865	1.50381	30	5521	19	2445	0.540222	0.846755	not_significant	-0.0805182	0.267428	2.8595	2.598	3.121	0.133	21.436	0	-0.0512	-0.058	-0.045	0.003	-15.754	0	TRUE
Abnormal involuntary movements	neurological	-0.1845	-0.672	0.303	0.249	-0.741	0.83152	0.510686	1.35391	48	5503	27	2437	0.458647	0.792808	not_significant	-0.0801273	0.338522	2.8614	2.6	3.123	0.133	21.454	0	-0.0512	-0.058	-0.045	0.003	-15.772	0	TRUE
Abnormal results of function study of kidney	genitourinary	0.3109	-0.649	1.27	0.49	0.635	1.36465	0.522568	3.56085	16	5535	10	2454	0.525347	0.840695	not_significant	0.135022	0.279554	2.8619	2.6	3.123	0.133	21.456	0	-0.0513	-0.058	-0.045	0.003	-15.794	0	TRUE
Abnormal results of function study of liver	digestive	-0.4807	-0.985	0.024	0.258	-1.867	0.61835	0.373439	1.02429	36	5515	28	2436	0.0619413	0.289624	not_significant	-0.208765	1.20802	2.8606	2.599	3.122	0.133	21.444	0	-0.0511	-0.057	-0.045	0.003	-15.744	0	TRUE
Abnormal results of function study of pulmonary system	respiratory	0.9196	-0.323	2.162	0.634	1.45	2.50829	0.723974	8.6885	18	5533	10	2454	0.147008	0.455877	not_significant	0.399377	0.832659	2.8579	2.596	3.119	0.133	21.421	0	-0.0512	-0.058	-0.045	0.003	-15.771	0	TRUE
Abnormal results of function study of thyroid	endocrine/metabolic	0.6028	-0.252	1.458	0.436	1.382	1.82723	0.777245	4.29736	25	5526	10	2454	0.166896	0.492056	not_significant	0.261793	0.777554	2.8632	2.602	3.125	0.133	21.46	0	-0.0514	-0.058	-0.045	0.003	-15.809	0	TRUE
Abnormal results of other function studies (bladder, pancreas, placenta, spleen, etc)	symptoms	0.535	-0.8	1.87	0.681	0.785	1.70745	0.449329	6.4883	10	5541	10	2454	0.432186	0.775604	not_significant	0.232348	0.364329	2.862	2.601	3.123	0.133	21.454	0	-0.0513	-0.058	-0.045	0.003	-15.794	0	TRUE
Abnormal spermatozoa	genitourinary	3.6997	2.56	4.84	0.582	6.36	40.4352	12.9358	126.469	276	5275	10	2454	2.01143e-10	1.41628e-08	mi_significant	1.60676	9.6965	2.7714	2.508	3.035	0.134	20.639	0	-0.0502	-0.057	-0.044	0.003	-15.362	0	TRUE
Abnormality of red blood cells	hematopoietic	-0.027	-2.322	2.268	1.171	-0.023	0.973361	0.0980772	9.66006	10	5541	10	2454	0.981639	0.996626	not_significant	-0.011726	0.00804806	2.8612	2.6	3.123	0.133	21.448	0	-0.0512	-0.058	-0.045	0.003	-15.784	0	TRUE
Acid-base balance disorder	endocrine/metabolic	-0.8493	-2.828	1.13	1.01	-0.841	0.427714	0.059131	3.09566	10	5541	10	2454	0.400334	0.747013	not_significant	-0.368846	0.397577	2.8619	2.6	3.123	0.133	21.456	0	-0.0513	-0.058	-0.045	0.003	-15.787	0	TRUE
Acidosis	endocrine/metabolic	-0.0846	-0.997	0.828	0.466	-0.182	0.91888	0.368985	2.28874	15	5536	10	2454	0.85584	0.955635	not_significant	-0.0367413	0.0676073	2.8611	2.6	3.122	0.133	21.45	0	-0.0512	-0.058	-0.045	0.003	-15.781	0	TRUE
Acne	dermatologic	0.0527	-0.287	0.393	0.173	0.304	1.05411	0.750512	1.48142	125	5426	49	2415	0.761003	0.920837	not_significant	0.0228873	0.118614	2.8591	2.597	3.121	0.134	21.409	0	-0.0512	-0.058	-0.045	0.003	-15.773	0	TRUE
Acquired absence of organs		-0.7853	-1.319	-0.252	0.272	-2.886	0.455983	0.267403	0.777245	28	5523	30	2434	0.00390135	0.0389159	con_significant	-0.341051	2.40879	2.8582	2.597	3.12	0.133	21.414	0	-0.051	-0.057	-0.045	0.003	-15.699	0	TRUE
Acquired acanthosis nigricans	dermatologic	0.5688	-1.554	2.691	1.083	0.525	1.76615	0.211401	14.7464	10	5541	10	2454	0.59939	0.870716	not_significant	0.247027	0.22229	2.8587	2.597	3.12	0.133	21.424	0	-0.0512	-0.058	-0.045	0.003	-15.764	0	TRUE
Acquired coagulation factor deficiency	hematopoietic	1.0464	-1.094	3.187	1.092	0.958	2.84738	0.334874	24.2157	10	5541	10	2454	0.338071	0.685553	not_significant	0.454446	0.470992	2.8611	2.6	3.123	0.133	21.449	0	-0.0513	-0.058	-0.045	0.003	-15.788	0	TRUE
Acquired deformities of finger	musculoskeletal	-0.9109	-1.923	0.102	0.517	-1.763	0.402162	0.146168	1.10738	10	5541	10	2454	0.0778308	0.333919	not_significant	-0.395599	1.10885	2.8589	2.597	3.12	0.133	21.429	0	-0.0511	-0.058	-0.045	0.003	-15.746	0	TRUE
Acquired deformities of forearm	musculoskeletal	0.1764	-2.332	2.684	1.28	0.138	1.19292	0.0971014	14.6436	10	5541	10	2454	0.890334	0.962483	not_significant	0.0766095	0.050447	2.8613	2.6	3.123	0.133	21.452	0	-0.0513	-0.058	-0.045	0.003	-15.785	0	TRUE
Acquired foot deformities	musculoskeletal	-0.5718	-1.602	0.458	0.526	-1.088	0.564508	0.201493	1.58091	10	5541	10	2454	0.276685	0.628449	not_significant	-0.24833	0.558014	2.8605	2.599	3.122	0.133	21.448	0	-0.0512	-0.058	-0.045	0.003	-15.771	0	TRUE
Acquired hemolytic anemias	hematopoietic	0.6458	-1.89	3.181	1.294	0.499	1.90751	0.151072	24.0708	10	5541	10	2454	0.617645	0.879261	not_significant	0.280467	0.209261	2.8633	2.602	3.125	0.133	21.457	0	-0.0513	-0.058	-0.045	0.003	-15.794	0	TRUE
Acquired hypothyroidism	endocrine/metabolic	0.2672	-0.44	0.974	0.361	0.741	1.3063	0.644036	2.64852	28	5523	12	2452	0.458994	0.792808	not_significant	0.116043	0.338193	2.8639	2.602	3.125	0.133	21.463	0	-0.0513	-0.058	-0.045	0.003	-15.802	0	TRUE
Acquired spondylolisthesis	musculoskeletal	-0.1306	-1.14	0.879	0.515	-0.253	0.877569	0.319819	2.40849	11	5540	10	2454	0.799892	0.946533	not_significant	-0.0567189	0.0969686	2.8611	2.6	3.123	0.133	21.452	0	-0.0512	-0.058	-0.045	0.003	-15.783	0	TRUE
Acromegaly and gigantism	endocrine/metabolic	-0.9009	-2.885	1.083	1.012	-0.89	0.406204	0.0558548	2.95353	10	5541	10	2454	0.373448	0.716373	not_significant	-0.391256	0.42777	2.8622	2.601	3.124	0.133	21.458	0	-0.0513	-0.058	-0.045	0.003	-15.789	0	TRUE
Actinic keratosis	dermatologic	-0.9069	-1.337	-0.476	0.22	-4.129	0.403774	0.262632	0.621263	36	5515	58	2406	3.65005e-05	0.00082436	con_significant	-0.393862	4.4377	2.8075	2.545	3.07	0.134	20.944	0	-0.0496	-0.056	-0.043	0.003	-15.164	0	TRUE
Acute and chronic tonsillitis	respiratory	-1.0043	-2.971	0.962	1.003	-1.001	0.366301	0.051252	2.61693	10	5541	10	2454	0.316776	0.669931	not_significant	-0.436162	0.499248	2.8633	2.602	3.125	0.133	21.462	0	-0.0513	-0.058	-0.045	0.003	-15.794	0	TRUE
Acute and subacute necrosis of liver	digestive	-0.5314	-1.89	0.827	0.693	-0.767	0.587781	0.151072	2.28645	10	5541	10	2454	0.443174	0.782418	not_significant	-0.230784	0.353426	2.861	2.6	3.122	0.133	21.452	0	-0.0512	-0.058	-0.045	0.003	-15.78	0	TRUE
Acute appendicitis	digestive	-0.8081	-1.637	0.02	0.423	-1.912	0.445704	0.194563	1.0202	11	5540	12	2452	0.0558879	0.270841	not_significant	-0.350953	1.25268	2.8606	2.599	3.122	0.133	21.445	0	-0.0512	-0.058	-0.045	0.003	-15.759	0	TRUE
Acute bronchitis and bronchiolitis	respiratory	-0.6462	-0.936	-0.357	0.148	-4.376	0.524033	0.392193	0.699772	101	5450	97	2367	1.20904e-05	0.000321605	con_significant	-0.280641	4.91756	2.843	2.581	3.105	0.133	21.298	0	-0.0504	-0.057	-0.044	0.003	-15.476	0	TRUE
Acute bronchospasm	respiratory	-1.2544	-2.012	-0.497	0.386	-3.247	0.285247	0.133721	0.608353	11	5540	19	2445	0.0011678	0.0151942	con_significant	-0.544779	2.93263	2.8583	2.597	3.12	0.133	21.422	0	-0.051	-0.057	-0.045	0.003	-15.715	0	TRUE
Acute cystitis	genitourinary	0.9647	-0.231	2.16	0.61	1.582	2.624	0.793739	8.67114	14	5537	10	2454	0.113685	0.405121	not_significant	0.418964	0.944297	2.8719	2.61	3.134	0.134	21.504	0	-0.0516	-0.058	-0.045	0.003	-15.855	0	TRUE
Acute dermatitis due to solar radiation	dermatologic	0.1348	-1.247	1.516	0.705	0.191	1.14431	0.287366	4.55397	10	5541	10	2454	0.848333	0.954959	not_significant	0.0585429	0.0714339	2.8609	2.599	3.122	0.133	21.449	0	-0.0512	-0.058	-0.045	0.003	-15.785	0	TRUE
Acute gastritis	digestive	0.2295	-0.719	1.178	0.484	0.474	1.25797	0.487239	3.24787	16	5535	10	2454	0.635408	0.884729	not_significant	0.0996706	0.196947	2.861	2.6	3.122	0.133	21.45	0	-0.0513	-0.058	-0.045	0.003	-15.788	0	TRUE
Acute laryngitis and tracheitis	respiratory	1.8283	-0.421	4.077	1.147	1.593	6.2233	0.65639	58.9683	10	5541	10	2454	0.111084	0.401716	not_significant	0.794021	0.954347	2.8679	2.606	3.129	0.133	21.502	0	-0.0514	-0.058	-0.045	0.003	-15.846	0	TRUE
Acute osteomyelitis	musculoskeletal	1.2726	-0.88	3.425	1.098	1.159	3.57012	0.414783	30.7226	10	5541	10	2454	0.246497	0.587763	not_significant	0.552683	0.608188	2.864	2.602	3.126	0.133	21.463	0	-0.0513	-0.058	-0.045	0.003	-15.805	0	TRUE
Acute pain	neurological	-0.9237	-1.228	-0.619	0.155	-5.942	0.397047	0.292878	0.538483	83	5468	97	2367	2.81413e-09	1.46457e-07	con_significant	-0.401158	8.55066	2.8607	2.599	3.123	0.134	21.403	0	-0.0507	-0.057	-0.044	0.003	-15.567	0	TRUE
Acute pancreatitis	digestive	-0.7169	-1.663	0.229	0.483	-1.485	0.488264	0.189569	1.25734	10	5541	10	2454	0.137563	0.440274	not_significant	-0.311346	0.861499	2.8658	2.604	3.127	0.133	21.476	0	-0.0513	-0.058	-0.045	0.003	-15.803	0	TRUE
Acute pericarditis	circulatory system	0.2407	-1.965	2.446	1.125	0.214	1.27214	0.140156	11.5421	10	5541	10	2454	0.830643	0.953093	not_significant	0.104535	0.0805854	2.8604	2.599	3.122	0.133	21.441	0	-0.0512	-0.058	-0.045	0.003	-15.778	0	TRUE
Acute pharyngitis	respiratory	-0.6207	-0.828	-0.413	0.106	-5.869	0.537568	0.436922	0.661662	221	5330	176	2288	4.39158e-09	2.10269e-07	con_significant	-0.269567	8.35738	2.896	2.634	3.158	0.134	21.643	0	-0.0513	-0.058	-0.045	0.003	-15.77	0	TRUE
Acute posthemorrhagic anemia	hematopoietic	-0.4388	-1.103	0.225	0.339	-1.296	0.64481	0.331874	1.25232	21	5530	18	2446	0.195128	0.527179	not_significant	-0.190568	0.709681	2.856	2.594	3.118	0.133	21.402	0	-0.0511	-0.057	-0.045	0.003	-15.712	0	TRUE
Acute prostatitis	genitourinary	0.3572	-0.844	1.559	0.613	0.583	1.42932	0.429987	4.75406	10	5541	10	2454	0.56006	0.85332	not_significant	0.15513	0.251765	2.8672	2.605	3.129	0.134	21.43	0	-0.0514	-0.058	-0.045	0.003	-15.775	0	TRUE
Acute reaction to stress	mental disorders	-0.163	-0.996	0.67	0.425	-0.384	0.849591	0.369354	1.95424	16	5535	10	2454	0.70131	0.908296	not_significant	-0.07079	0.15409	2.8611	2.6	3.122	0.133	21.452	0	-0.0512	-0.058	-0.045	0.003	-15.78	0	TRUE
Acute renal failure	genitourinary	0.2784	-0.244	0.801	0.267	1.044	1.32101	0.783488	2.22777	56	5495	22	2442	0.296562	0.647782	not_significant	0.120908	0.527885	2.8639	2.602	3.125	0.133	21.469	0	-0.0514	-0.058	-0.045	0.003	-15.816	0	TRUE
Acute sinusitis	respiratory	-0.7566	-0.995	-0.518	0.122	-6.219	0.469259	0.369723	0.595711	149	5402	145	2319	5.01467e-10	2.85836e-08	con_significant	-0.328587	9.29976	2.8653	2.604	3.127	0.134	21.451	0	-0.0506	-0.057	-0.044	0.003	-15.555	0	TRUE
Acute tonsillitis	respiratory	-0.5843	-1.563	0.394	0.499	-1.17	0.557496	0.209507	1.4829	10	5541	10	2454	0.24189	0.587763	not_significant	-0.253758	0.616383	2.8647	2.603	3.126	0.133	21.471	0	-0.0513	-0.058	-0.045	0.003	-15.8	0	TRUE
Acute upper respiratory infections of multiple or unspecified sites	respiratory	-0.6816	-0.857	-0.506	0.089	-7.624	0.505807	0.424433	0.602902	306	5245	265	2199	2.45972e-14	3.68036e-12	con_significant	-0.296015	13.6091	2.8844	2.622	3.147	0.134	21.538	0	-0.0505	-0.057	-0.044	0.003	-15.498	0	TRUE
Acute vascular insufficiency of intestine	circulatory system	1.1758	-0.957	3.308	1.088	1.081	3.24073	0.384043	27.3304	10	5541	10	2454	0.279804	0.629558	not_significant	0.510643	0.553147	2.861	2.599	3.122	0.133	21.444	0	-0.0513	-0.058	-0.045	0.003	-15.786	0	TRUE
Acute, but ill-defined cerebrovascular disease	circulatory system	0.0955	-2.318	2.509	1.231	0.078	1.10021	0.0984703	12.2926	10	5541	10	2454	0.938215	0.980823	not_significant	0.0414751	0.0276978	2.8612	2.6	3.123	0.133	21.452	0	-0.0512	-0.058	-0.045	0.003	-15.785	0	TRUE
Adjustment reaction	mental disorders	-0.2407	-0.615	0.134	0.191	-1.26	0.786077	0.540641	1.14339	80	5471	46	2418	0.20757	0.54722	not_significant	-0.104535	0.682835	2.8634	2.602	3.125	0.133	21.468	0	-0.0512	-0.058	-0.045	0.003	-15.774	0	TRUE
Adrenogenital disorders	endocrine/metabolic	1.3986	-0.669	3.466	1.055	1.326	4.04953	0.512221	32.0085	10	5541	10	2454	0.184962	0.52094	not_significant	0.607404	0.732917	2.8583	2.597	3.12	0.133	21.427	0	-0.0512	-0.058	-0.045	0.003	-15.771	0	TRUE
Adverse drug events and drug allergies	injuries & poisonings	1.229	-0.297	2.755	0.778	1.579	3.41781	0.743044	15.721	14	5537	10	2454	0.114395	0.405121	not_significant	0.533748	0.941593	2.8628	2.601	3.124	0.134	21.441	0	-0.0513	-0.058	-0.045	0.003	-15.793	0	TRUE
Adverse effects of sedatives or other central nervous system depressants and anesthetics	injuries & poisonings	0.6133	-0.928	2.155	0.786	0.78	1.84651	0.395344	8.62789	10	5541	10	2454	0.435427	0.775604	not_significant	0.266353	0.361085	2.8596	2.598	3.121	0.133	21.439	0	-0.0512	-0.058	-0.045	0.003	-15.779	0	TRUE
Agorophobia, social phobia, and panic disorder	mental disorders	-0.4059	-0.956	0.144	0.281	-1.446	0.666377	0.384428	1.15488	34	5517	22	2442	0.148101	0.45808	not_significant	-0.17628	0.829442	2.865	2.603	3.126	0.133	21.473	0	-0.0513	-0.058	-0.045	0.003	-15.79	0	TRUE
Alcohol-related disorders	mental disorders	-1.319	-2.104	-0.534	0.401	-3.293	0.267403	0.121968	0.586255	10	5541	18	2446	0.000992347	0.0136533	con_significant	-0.572834	3.00334	2.8605	2.599	3.122	0.133	21.434	0	-0.0511	-0.057	-0.045	0.003	-15.731	0	TRUE
Alcoholic liver damage	mental disorders	-1.6234	-3.243	-0.004	0.826	-1.964	0.197227	0.0390466	0.996008	10	5541	10	2454	0.0494759	0.250944	not_significant	-0.705034	1.30561	2.8559	2.594	3.117	0.133	21.409	0	-0.0511	-0.057	-0.045	0.003	-15.727	0	TRUE
Alcoholism	mental disorders	-0.3763	-0.914	0.161	0.274	-1.373	0.686396	0.400917	1.17468	34	5517	24	2440	0.169864	0.492317	not_significant	-0.163425	0.7699	2.8603	2.599	3.122	0.133	21.444	0	-0.0512	-0.058	-0.045	0.003	-15.753	0	TRUE
Alkalosis	endocrine/metabolic	-0.028	-1.717	1.661	0.862	-0.032	0.972388	0.179604	5.26457	10	5541	10	2454	0.974099	0.993183	not_significant	-0.0121602	0.0113968	2.8612	2.6	3.123	0.133	21.451	0	-0.0512	-0.058	-0.045	0.003	-15.785	0	TRUE
Allergic conjunctivitis	sense organs	-0.2919	-0.924	0.34	0.322	-0.905	0.746843	0.396928	1.40495	25	5526	17	2447	0.365286	0.710971	not_significant	-0.126771	0.437367	2.8598	2.598	3.121	0.133	21.44	0	-0.0512	-0.058	-0.045	0.003	-15.757	0	TRUE
Allergic purpura	hematopoietic	-0.3745	-2.776	2.027	1.225	-0.306	0.687633	0.0622872	7.59128	10	5541	10	2454	0.759814	0.92077	not_significant	-0.162643	0.119293	2.8618	2.6	3.123	0.133	21.453	0	-0.0513	-0.058	-0.045	0.003	-15.787	0	TRUE
Allergic reaction to food	injuries & poisonings	-0.1235	-1.309	1.062	0.605	-0.204	0.883822	0.27009	2.89215	10	5541	10	2454	0.838168	0.954762	not_significant	-0.0536354	0.0766691	2.8617	2.6	3.123	0.133	21.451	0	-0.0513	-0.058	-0.045	0.003	-15.786	0	TRUE
Allergic rhinitis	respiratory	-0.5096	-0.667	-0.352	0.08	-6.338	0.600736	0.513246	0.70328	423	5128	313	2151	2.32999e-10	1.4679e-08	con_significant	-0.221316	9.63265	2.8743	2.612	3.136	0.134	21.505	0	-0.0503	-0.057	-0.044	0.003	-15.461	0	TRUE
Allergies, other	injuries & poisonings	-0.3219	-0.67	0.027	0.178	-1.811	0.724771	0.511709	1.02737	84	5467	56	2408	0.070212	0.31477	not_significant	-0.139799	1.15359	2.8597	2.598	3.121	0.133	21.438	0	-0.0511	-0.057	-0.045	0.003	-15.72	0	TRUE
Alopecia	dermatologic	-0.2692	-0.596	0.058	0.167	-1.612	0.76399	0.551011	1.05971	105	5446	59	2405	0.106948	0.396338	not_significant	-0.116912	0.970826	2.8692	2.608	3.131	0.134	21.489	0	-0.0513	-0.058	-0.045	0.003	-15.798	0	TRUE
Alopecia Areata	dermatologic	0.0902	-0.686	0.866	0.396	0.228	1.09439	0.503586	2.37738	24	5527	10	2454	0.819701	0.953093	not_significant	0.0391734	0.0863443	2.8604	2.599	3.122	0.133	21.44	0	-0.0512	-0.058	-0.045	0.003	-15.781	0	TRUE
Alpha-1-antitrypsin deficiency	endocrine/metabolic	-1.6758	-3.989	0.637	1.18	-1.42	0.187158	0.0185182	1.8908	10	5541	10	2454	0.155589	0.471494	not_significant	-0.727791	0.808021	2.8589	2.597	3.12	0.133	21.434	0	-0.0512	-0.058	-0.045	0.003	-15.76	0	TRUE
Alteration of consciousness	mental disorders	-0.1497	-0.851	0.551	0.358	-0.419	0.860966	0.426988	1.73499	24	5527	13	2451	0.675446	0.904372	not_significant	-0.0650139	0.17041	2.8613	2.6	3.123	0.133	21.452	0	-0.0512	-0.058	-0.045	0.003	-15.78	0	TRUE
Altered mental status	mental disorders	-0.0761	-0.882	0.73	0.411	-0.185	0.926724	0.413954	2.07508	18	5533	10	2454	0.853171	0.954959	not_significant	-0.0330498	0.0689637	2.8608	2.599	3.122	0.133	21.448	0	-0.0512	-0.058	-0.045	0.003	-15.776	0	TRUE
Althete's foot	infectious diseases	-0.2829	-0.67	0.104	0.197	-1.433	0.753595	0.511709	1.1096	66	5485	47	2417	0.151947	0.466362	not_significant	-0.122862	0.818307	2.8541	2.592	3.116	0.133	21.384	0	-0.051	-0.057	-0.045	0.003	-15.669	0	TRUE
Amblyopia	sense organs	0.9155	-0.602	2.433	0.774	1.183	2.49802	0.547715	11.393	11	5540	10	2454	0.236996	0.582514	not_significant	0.397597	0.625259	2.8602	2.599	3.122	0.133	21.444	0	-0.0513	-0.058	-0.045	0.003	-15.786	0	TRUE
Amyloidosis	endocrine/metabolic	1.2112	-0.936	3.358	1.095	1.106	3.35751	0.392193	28.7317	10	5541	10	2454	0.268817	0.616425	not_significant	0.526017	0.570543	2.863	2.602	3.125	0.133	21.46	0	-0.0513	-0.058	-0.045	0.003	-15.8	0	TRUE
Amyotrophic Lateral Sclerosis	neurological	-1.0423	-3.82	1.736	1.417	-0.735	0.352643	0.0219278	5.6746	10	5541	10	2454	0.46214	0.793771	not_significant	-0.452665	0.335226	2.8624	2.601	3.124	0.133	21.458	0	-0.0513	-0.058	-0.045	0.003	-15.791	0	TRUE
Anal and rectal conditions	digestive	-0.3601	-0.706	-0.014	0.177	-2.04	0.697607	0.493615	0.986098	87	5464	57	2407	0.0413999	0.225253	not_significant	-0.156389	1.383	2.8639	2.602	3.125	0.133	21.47	0	-0.0511	-0.058	-0.045	0.003	-15.752	0	TRUE
Anal and rectal polyp	digestive	-0.5183	-1.338	0.302	0.418	-1.238	0.595532	0.26237	1.35256	12	5539	12	2452	0.215548	0.558466	not_significant	-0.225095	0.666456	2.8558	2.594	3.117	0.133	21.403	0	-0.0511	-0.057	-0.045	0.003	-15.717	0	TRUE
Anaphylactic shock NOS	injuries & poisonings	-0.0619	-1.468	1.344	0.717	-0.086	0.939977	0.230386	3.83435	10	5541	10	2454	0.931222	0.978277	not_significant	-0.0268828	0.0309466	2.8611	2.6	3.123	0.133	21.452	0	-0.0512	-0.058	-0.045	0.003	-15.785	0	TRUE
Anemia in chronic kidney disease	hematopoietic	0.4266	-0.595	1.448	0.521	0.818	1.53204	0.551563	4.2546	16	5535	10	2454	0.413096	0.753775	not_significant	0.18527	0.383949	2.8611	2.6	3.123	0.133	21.451	0	-0.0513	-0.058	-0.045	0.003	-15.791	0	TRUE
Anemia in neoplastic disease	hematopoietic	1.8019	0.341	3.263	0.746	2.417	6.06115	1.40635	26.1278	27	5524	10	2454	0.0156634	0.117182	not_significant	0.782555	1.80511	2.8595	2.598	3.121	0.134	21.394	0	-0.0513	-0.058	-0.045	0.003	-15.768	0	TRUE
Anemia of chronic disease	hematopoietic	0.2778	-0.714	1.269	0.506	0.549	1.32022	0.489682	3.55729	15	5536	10	2454	0.582866	0.863914	not_significant	0.120647	0.234431	2.8622	2.601	3.124	0.133	21.456	0	-0.0513	-0.058	-0.045	0.003	-15.793	0	TRUE
Aneurysm of iliac artery	circulatory system	0.6926	-1.721	3.106	1.232	0.562	1.99891	0.178887	22.3315	10	5541	10	2454	0.573869	0.858101	not_significant	0.300792	0.241187	2.8641	2.602	3.126	0.133	21.455	0	-0.0513	-0.058	-0.045	0.003	-15.794	0	TRUE
Angina pectoris	circulatory system	-0.6996	-1.841	0.442	0.583	-1.201	0.496784	0.158659	1.55582	10	5541	10	2454	0.229787	0.574227	not_significant	-0.303832	0.638675	2.8498	2.588	3.112	0.134	21.315	0	-0.0509	-0.057	-0.045	0.003	-15.638	0	TRUE
Ankylosing spondylitis	musculoskeletal	-0.7128	-1.911	0.485	0.611	-1.166	0.49027	0.147932	1.62418	10	5541	10	2454	0.243557	0.587763	not_significant	-0.309565	0.613399	2.8635	2.602	3.125	0.133	21.464	0	-0.0513	-0.058	-0.045	0.003	-15.793	0	TRUE
Ankylosis of joint	musculoskeletal	-1.6775	-2.831	-0.524	0.588	-2.852	0.18684	0.0589539	0.592147	10	5541	11	2453	0.00435104	0.042343	con_significant	-0.728529	2.36141	2.8579	2.596	3.119	0.133	21.422	0	-0.0511	-0.057	-0.045	0.003	-15.729	0	TRUE
Anomalies of jaw size/symmetry	digestive	-1.1831	-2.232	-0.134	0.535	-2.21	0.306328	0.107314	0.87459	10	5541	10	2454	0.027072	0.166064	not_significant	-0.513814	1.56748	2.8624	2.601	3.124	0.133	21.455	0	-0.0512	-0.058	-0.045	0.003	-15.772	0	TRUE
Anomalies of tooth position/malocclusion	digestive	-0.2115	-1.674	1.251	0.746	-0.283	0.809369	0.187496	3.49384	10	5541	10	2454	0.776919	0.934645	not_significant	-0.0918533	0.109624	2.861	2.6	3.122	0.133	21.452	0	-0.0512	-0.058	-0.045	0.003	-15.783	0	TRUE
Anomalous atrioventricular excitation	circulatory system	-0.5905	-1.918	0.737	0.677	-0.872	0.55405	0.1469	2.08966	10	5541	10	2454	0.383154	0.73031	not_significant	-0.256451	0.416627	2.8619	2.6	3.123	0.133	21.456	0	-0.0512	-0.058	-0.045	0.003	-15.785	0	TRUE
Anorexia	endocrine/metabolic	0.0524	-0.834	0.939	0.452	0.116	1.0538	0.434309	2.55742	19	5532	10	2454	0.907848	0.97113	not_significant	0.022757	0.0419867	2.8607	2.599	3.122	0.133	21.441	0	-0.0512	-0.058	-0.045	0.003	-15.781	0	TRUE
Anorexia nervosa	mental disorders	-0.9397	-3.723	1.844	1.42	-0.662	0.390745	0.0241614	6.32177	10	5541	10	2454	0.508184	0.829972	not_significant	-0.408107	0.293979	2.8619	2.6	3.123	0.133	21.456	0	-0.0513	-0.058	-0.045	0.003	-15.788	0	TRUE
Anterior pituitary disorders		2.322	0.864	3.78	0.744	3.122	10.196	2.37263	43.816	33	5518	10	2454	0.00179406	0.0208168	mi_significant	1.00843	2.74616	2.8816	2.619	3.144	0.134	21.513	0	-0.0519	-0.058	-0.046	0.003	-15.913	0	TRUE
Antineoplastic and immunosuppressive drugs causing adverse effects	injuries & poisonings	1.4757	0.429	2.522	0.534	2.763	4.3741	1.53572	12.4535	42	5509	10	2454	0.00572366	0.0543748	not_significant	0.640888	2.24233	2.8535	2.591	3.116	0.134	21.336	0	-0.0512	-0.058	-0.045	0.003	-15.725	0	TRUE
Anxiety disorder	mental disorders	-1.4197	-1.593	-1.246	0.089	-16.032	0.241787	0.203315	0.287653	234	5317	383	2081	7.68355e-58	4.59861e-55	con_significant	-0.616568	57.1144	2.9633	2.697	3.23	0.136	21.799	0	-0.0507	-0.057	-0.044	0.003	-15.362	0	TRUE
Anxiety disorders	mental disorders	0.0798	-2.236	2.396	1.182	0.068	1.08307	0.106885	10.9792	10	5541	10	2454	0.946131	0.985533	not_significant	0.0346567	0.0240487	2.861	2.6	3.122	0.133	21.449	0	-0.0512	-0.058	-0.045	0.003	-15.784	0	TRUE
Aortic aneurysm	circulatory system	-0.3733	-1.252	0.506	0.448	-0.832	0.688459	0.285932	1.65864	11	5540	10	2454	0.405184	0.75147	not_significant	-0.162122	0.392348	2.857	2.595	3.119	0.133	21.409	0	-0.0511	-0.057	-0.045	0.003	-15.729	0	TRUE
Aortic ectasia	circulatory system	-0.8635	-2.008	0.281	0.584	-1.479	0.421684	0.134257	1.32445	10	5541	10	2454	0.139057	0.44269	not_significant	-0.375013	0.856807	2.8535	2.592	3.115	0.133	21.382	0	-0.051	-0.057	-0.045	0.003	-15.699	0	TRUE
Aphasia	mental disorders	0.1692	-1.119	1.458	0.658	0.257	1.18436	0.326606	4.29736	10	5541	10	2454	0.796861	0.946533	not_significant	0.0734826	0.0986173	2.8622	2.601	3.124	0.133	21.449	0	-0.0513	-0.058	-0.045	0.003	-15.783	0	TRUE
Aphasia/speech disturbance	mental disorders	-0.1775	-1.183	0.828	0.513	-0.346	0.837361	0.306358	2.28874	10	5541	10	2454	0.729483	0.908296	not_significant	-0.0770873	0.136985	2.86	2.599	3.121	0.133	21.437	0	-0.0512	-0.058	-0.045	0.003	-15.765	0	TRUE
Aplastic anemia	hematopoietic	-0.2037	-2.012	1.604	0.922	-0.221	0.815707	0.133721	4.97288	10	5541	10	2454	0.825199	0.953093	not_significant	-0.0884658	0.0834412	2.8609	2.599	3.122	0.133	21.45	0	-0.0512	-0.058	-0.045	0.003	-15.781	0	TRUE
Apnea	respiratory	-0.2979	-1.447	0.851	0.586	-0.508	0.742376	0.235275	2.34199	10	5541	10	2454	0.611336	0.875321	not_significant	-0.129376	0.21372	2.8612	2.6	3.123	0.133	21.453	0	-0.0512	-0.058	-0.045	0.003	-15.782	0	TRUE
Appendiceal conditions	digestive	-0.3858	-2.208	1.436	0.93	-0.415	0.679906	0.10992	4.20385	10	5541	10	2454	0.678173	0.904986	not_significant	-0.167551	0.16866	2.8613	2.6	3.123	0.133	21.453	0	-0.0512	-0.058	-0.045	0.003	-15.785	0	TRUE
Appendicitis	digestive	-0.197	-1.308	0.914	0.567	-0.347	0.821191	0.27036	2.49428	10	5541	10	2454	0.728242	0.908296	not_significant	-0.085556	0.137724	2.8613	2.6	3.123	0.133	21.454	0	-0.0512	-0.058	-0.045	0.003	-15.784	0	TRUE
Arrhythmia (cardiac) NOS	circulatory system	-0.2095	-0.695	0.276	0.248	-0.845	0.81099	0.499074	1.31785	46	5505	28	2436	0.398153	0.744671	not_significant	-0.0909847	0.39995	2.8599	2.599	3.121	0.133	21.443	0	-0.0512	-0.058	-0.045	0.003	-15.755	0	TRUE
Arterial dissection	circulatory system	0.1878	-1.624	2	0.924	0.203	1.20659	0.197109	7.38906	10	5541	10	2454	0.839036	0.954762	not_significant	0.0815605	0.0762194	2.862	2.6	3.124	0.133	21.445	0	-0.0513	-0.058	-0.045	0.003	-15.78	0	TRUE
Arterial embolism and thrombosis of lower extremity artery	circulatory system	0.8567	-1.507	3.221	1.206	0.71	2.35538	0.221574	25.0532	10	5541	10	2454	0.477554	0.803835	not_significant	0.37206	0.320978	2.8638	2.602	3.125	0.133	21.462	0	-0.0513	-0.058	-0.045	0.003	-15.8	0	TRUE
Arteritis NOS	circulatory system	-0.4703	-1.805	0.864	0.681	-0.691	0.624815	0.164474	2.37263	10	5541	10	2454	0.489764	0.815365	not_significant	-0.204249	0.310013	2.8608	2.599	3.122	0.133	21.449	0	-0.0512	-0.058	-0.045	0.003	-15.777	0	TRUE
Arthralgia/ankylosis of temporomandibular joint	digestive	-0.9813	-1.94	-0.022	0.489	-2.005	0.374824	0.143704	0.97824	10	5541	10	2454	0.0449316	0.232982	not_significant	-0.426173	1.34745	2.8655	2.604	3.127	0.133	21.474	0	-0.0513	-0.058	-0.045	0.003	-15.796	0	TRUE
Arthropathy associated with neurological disorders	musculoskeletal	-0.2221	-3.078	2.633	1.457	-0.152	0.800835	0.0460513	13.9155	10	5541	10	2454	0.878828	0.958318	not_significant	-0.0964568	0.0560961	2.8607	2.599	3.122	0.133	21.444	0	-0.0512	-0.058	-0.045	0.003	-15.777	0	TRUE
Arthropathy NOS	musculoskeletal	-0.8107	-1.331	-0.291	0.265	-3.055	0.444547	0.264213	0.747516	27	5524	34	2430	0.00224839	0.0251525	con_significant	-0.352083	2.64813	2.8455	2.584	3.107	0.134	21.311	0	-0.0507	-0.057	-0.044	0.003	-15.582	0	TRUE
Articular cartilage disorder	musculoskeletal	-1.1302	-1.891	-0.369	0.388	-2.911	0.322969	0.150921	0.691425	12	5539	16	2448	0.00360714	0.0362836	con_significant	-0.49084	2.44284	2.867	2.605	3.129	0.133	21.485	0	-0.0513	-0.058	-0.045	0.003	-15.791	0	TRUE
Ascites (non malignant)	digestive	-7.525e-05	-0.831	0.831	0.424	0	0.999925	0.435613	2.29561	21	5530	10	2454	0.999858	0.999858	not_significant	-3.26807e-05	6.14901e-05	2.8611	2.6	3.123	0.133	21.442	0	-0.0512	-0.058	-0.045	0.003	-15.782	0	TRUE
Aseptic necrosis of bone	musculoskeletal	-0.4838	-1.536	0.568	0.537	-0.901	0.616436	0.21524	1.76473	10	5541	10	2454	0.367358	0.712995	not_significant	-0.210112	0.43491	2.8642	2.603	3.126	0.133	21.466	0	-0.0513	-0.058	-0.045	0.003	-15.797	0	TRUE
Asphyxia and hypoxemia		-0.3665	-0.983	0.25	0.315	-1.165	0.693156	0.374187	1.28403	27	5524	19	2445	0.244075	0.587763	not_significant	-0.159169	0.612477	2.86	2.599	3.121	0.133	21.441	0	-0.0512	-0.058	-0.045	0.003	-15.754	0	TRUE
Asthma	respiratory	-0.6287	-0.841	-0.416	0.108	-5.798	0.533285	0.431279	0.65968	201	5350	178	2286	6.71141e-09	3.08983e-07	con_significant	-0.273041	8.17319	2.8501	2.588	3.112	0.134	21.325	0	-0.0502	-0.057	-0.044	0.003	-15.397	0	TRUE
Asthma with exacerbation	respiratory	-0.7136	-1.07	-0.357	0.182	-3.921	0.489877	0.343009	0.699772	66	5485	62	2402	8.8183e-05	0.00175925	con_significant	-0.309913	4.05462	2.8652	2.604	3.127	0.133	21.463	0	-0.051	-0.057	-0.045	0.003	-15.706	0	TRUE
Astigmatism	sense organs	-0.6677	-0.974	-0.361	0.156	-4.272	0.512887	0.37757	0.696979	96	5455	80	2384	1.93807e-05	0.000473443	con_significant	-0.289978	4.71263	2.8826	2.62	3.145	0.134	21.553	0	-0.0514	-0.058	-0.045	0.003	-15.798	0	TRUE
Atherosclerosis	circulatory system	-0.5552	-3.342	2.232	1.422	-0.39	0.573957	0.0353662	9.31848	10	5541	10	2454	0.696178	0.908296	not_significant	-0.24112	0.157279	2.8607	2.599	3.122	0.133	21.449	0	-0.0512	-0.058	-0.045	0.003	-15.78	0	TRUE
Atherosclerosis of aorta	circulatory system	-0.4819	-2.025	1.061	0.787	-0.612	0.617609	0.131994	2.88926	10	5541	10	2454	0.540452	0.846755	not_significant	-0.209287	0.267243	2.8577	2.596	3.119	0.133	21.407	0	-0.0511	-0.058	-0.045	0.003	-15.736	0	TRUE
Atherosclerosis of native arteries of the extremities with intermittent claudication	circulatory system	-1.1141	-2.931	0.703	0.927	-1.202	0.328211	0.0533437	2.0198	10	5541	10	2454	0.229514	0.574227	not_significant	-0.483847	0.639192	2.8609	2.599	3.122	0.133	21.448	0	-0.0512	-0.058	-0.045	0.003	-15.775	0	TRUE
Atherosclerosis of native arteries of the extremities with ulceration or gangrene	circulatory system	-0.8115	-3.585	1.962	1.415	-0.574	0.444191	0.0277367	7.11354	10	5541	10	2454	0.566285	0.858029	not_significant	-0.35243	0.246965	2.8614	2.6	3.123	0.133	21.453	0	-0.0512	-0.058	-0.045	0.003	-15.785	0	TRUE
Atherosclerosis of the extremities	circulatory system	-0.6321	-3.41	2.146	1.417	-0.446	0.531475	0.0330412	8.55059	10	5541	10	2454	0.655617	0.894826	not_significant	-0.274518	0.18335	2.8609	2.599	3.122	0.133	21.45	0	-0.0512	-0.058	-0.045	0.003	-15.782	0	TRUE
Atopic/contact dermatitis due to other or unspecified	dermatologic	-0.3696	-0.554	-0.186	0.094	-3.936	0.691011	0.574647	0.830274	320	5231	213	2251	8.29202e-05	0.0016823	con_significant	-0.160515	4.08134	2.8644	2.603	3.126	0.133	21.462	0	-0.0507	-0.057	-0.044	0.003	-15.588	0	TRUE
Atrial fibrillation	circulatory system	-0.3963	-0.867	0.075	0.24	-1.648	0.672805	0.42021	1.07788	39	5512	38	2426	0.0992737	0.382092	not_significant	-0.172111	1.00317	2.8435	2.581	3.106	0.134	21.236	0	-0.0507	-0.057	-0.044	0.003	-15.526	0	TRUE
Atrial flutter	circulatory system	-0.1253	-0.939	0.689	0.415	-0.302	0.882232	0.391019	1.99172	14	5537	12	2452	0.762815	0.921382	not_significant	-0.0544171	0.117581	2.8585	2.596	3.12	0.134	21.385	0	-0.0512	-0.058	-0.045	0.003	-15.713	0	TRUE
Atrioventricular [AV] block	circulatory system	-1.2326	-3.049	0.584	0.927	-1.33	0.291534	0.0474063	1.7932	10	5541	10	2454	0.183612	0.519975	not_significant	-0.535311	0.7361	2.8621	2.601	3.124	0.133	21.457	0	-0.0513	-0.058	-0.045	0.003	-15.785	0	TRUE
Atrioventricular block, complete	circulatory system	-1.6687	-3.956	0.619	1.167	-1.43	0.188492	0.0191395	1.85707	10	5541	10	2454	0.152748	0.466426	not_significant	-0.724707	0.816025	2.859	2.598	3.12	0.133	21.435	0	-0.0512	-0.058	-0.045	0.003	-15.761	0	TRUE
Atrophic gastritis	digestive	0.0068	-0.565	0.578	0.292	0.023	1.00682	0.56836	1.78247	39	5512	19	2445	0.981462	0.996626	not_significant	0.0029532	0.00812633	2.8611	2.6	3.123	0.133	21.451	0	-0.0512	-0.058	-0.045	0.003	-15.781	0	TRUE
Attention deficit hyperactivity disorder	mental disorders	-0.5957	-1.006	-0.186	0.209	-2.847	0.551177	0.365679	0.830274	54	5497	43	2421	0.0044083	0.0425543	con_significant	-0.258709	2.35573	2.8694	2.608	3.131	0.133	21.497	0	-0.0513	-0.058	-0.045	0.003	-15.782	0	TRUE
Autoimmune disease NEC	endocrine/metabolic	-0.8225	-2.827	1.182	1.022	-0.804	0.439332	0.0591902	3.26089	10	5541	10	2454	0.421157	0.763827	not_significant	-0.357207	0.375555	2.8615	2.6	3.123	0.133	21.455	0	-0.0512	-0.058	-0.045	0.003	-15.785	0	TRUE
Autoimmune hemolytic anemias	hematopoietic	-1.7554	-4.314	0.803	1.305	-1.345	0.172838	0.0133799	2.23223	10	5541	10	2454	0.178645	0.511575	not_significant	-0.762361	0.748009	2.863	2.602	3.124	0.133	21.467	0	-0.0513	-0.058	-0.045	0.003	-15.796	0	TRUE
Back pain	symptoms	-0.4771	-0.635	-0.319	0.081	-5.918	0.62058	0.529935	0.726876	426	5125	307	2157	3.26451e-09	1.62817e-07	con_significant	-0.207202	8.48618	2.8741	2.612	3.136	0.134	21.488	0	-0.0504	-0.057	-0.044	0.003	-15.475	0	TRUE
Bacteremia	infectious diseases	-0.1752	-1.053	0.702	0.448	-0.391	0.839289	0.34889	2.01778	15	5536	10	2454	0.695538	0.908296	not_significant	-0.0760884	0.157679	2.8606	2.599	3.122	0.133	21.447	0	-0.0512	-0.058	-0.045	0.003	-15.774	0	TRUE
Bacterial enteritis	infectious diseases	0.3713	-0.509	1.252	0.449	0.827	1.44962	0.601096	3.49733	20	5531	10	2454	0.408517	0.75147	not_significant	0.161254	0.388789	2.8622	2.601	3.124	0.133	21.455	0	-0.0513	-0.058	-0.045	0.003	-15.796	0	TRUE
Bacterial infection NOS	infectious diseases	0.5007	-0.135	1.136	0.324	1.544	1.64988	0.873716	3.11429	40	5511	14	2450	0.122676	0.421795	not_significant	0.217451	0.91124	2.8693	2.608	3.131	0.134	21.487	0	-0.0515	-0.058	-0.045	0.003	-15.842	0	TRUE
Bacterial pneumonia	respiratory	0.7776	-0.388	1.943	0.595	1.308	2.17624	0.678412	6.97966	14	5537	10	2454	0.190933	0.526605	not_significant	0.337707	0.719119	2.8674	2.606	3.129	0.134	21.47	0	-0.0514	-0.058	-0.045	0.003	-15.819	0	TRUE
Balanoposthitis	genitourinary	0.5484	-0.207	1.304	0.385	1.423	1.73048	0.81302	3.684	32	5519	10	2454	0.154652	0.470519	not_significant	0.238167	0.810645	2.8614	2.6	3.123	0.133	21.454	0	-0.0513	-0.058	-0.045	0.003	-15.805	0	TRUE
Barrett's esophagus	digestive	0.1193	-0.801	1.04	0.47	0.254	1.12671	0.44888	2.82922	13	5538	10	2454	0.799505	0.946533	not_significant	0.0518113	0.097179	2.8628	2.601	3.125	0.134	21.438	0	-0.0513	-0.058	-0.045	0.003	-15.772	0	TRUE
Basal cell carcinoma	neoplasms	-0.7802	-1.45	-0.11	0.342	-2.282	0.458314	0.23457	0.895834	16	5535	21	2443	0.0224917	0.152273	not_significant	-0.338837	1.64798	2.8482	2.586	3.11	0.134	21.331	0	-0.0508	-0.057	-0.044	0.003	-15.626	0	TRUE
Benign neoplasm of adrenal gland	neoplasms	0.6062	-1.69	2.903	1.172	0.517	1.83345	0.18452	18.2287	10	5541	10	2454	0.604839	0.873333	not_significant	0.263269	0.21836	2.8621	2.601	3.124	0.133	21.456	0	-0.0513	-0.058	-0.045	0.003	-15.791	0	TRUE
Benign neoplasm of bone and articular cartilage	neoplasms	0.6614	-0.921	2.243	0.807	0.819	1.9375	0.398121	9.42155	10	5541	10	2454	0.412588	0.753775	not_significant	0.287242	0.384484	2.8613	2.6	3.123	0.133	21.451	0	-0.0513	-0.058	-0.045	0.003	-15.79	0	TRUE
Benign neoplasm of brain, cranial nerves, meninges	neoplasms	0.2035	-0.889	1.296	0.557	0.365	1.22569	0.411067	3.65465	11	5540	10	2454	0.71513	0.908296	not_significant	0.0883789	0.145615	2.8621	2.601	3.124	0.133	21.452	0	-0.0513	-0.058	-0.045	0.003	-15.787	0	TRUE
Benign neoplasm of colon	neoplasms	-0.3605	-0.672	-0.049	0.159	-2.267	0.697328	0.510686	0.952181	89	5462	89	2375	0.023407	0.152273	not_significant	-0.156563	1.63065	2.8117	2.547	3.076	0.135	20.825	0	-0.0498	-0.056	-0.043	0.003	-15.06	0	TRUE
Benign neoplasm of eye	neoplasms	-0.9653	-3.741	1.811	1.416	-0.682	0.380869	0.0237304	6.11656	10	5541	10	2454	0.495516	0.821513	not_significant	-0.419224	0.304942	2.862	2.601	3.123	0.133	21.456	0	-0.0513	-0.058	-0.045	0.003	-15.789	0	TRUE
Benign neoplasm of eye, uveal	neoplasms	-0.4428	-1.977	1.092	0.783	-0.566	0.642236	0.138484	2.98023	10	5541	10	2454	0.571621	0.858101	not_significant	-0.192306	0.242892	2.861	2.6	3.122	0.133	21.451	0	-0.0512	-0.058	-0.045	0.003	-15.781	0	TRUE
Benign neoplasm of kidney and other urinary organs	neoplasms	-1.6522	-4.068	0.763	1.232	-1.34	0.191628	0.0171116	2.1447	10	5541	10	2454	0.180085	0.512022	not_significant	-0.717541	0.744523	2.8633	2.602	3.125	0.133	21.463	0	-0.0513	-0.058	-0.045	0.003	-15.794	0	TRUE
Benign neoplasm of lip, oral cavity, and pharynx	neoplasms	1.2667	-0.866	3.399	1.088	1.164	3.54912	0.420631	29.9342	10	5541	10	2454	0.244425	0.587763	not_significant	0.550121	0.611855	2.8639	2.602	3.125	0.133	21.464	0	-0.0513	-0.058	-0.045	0.003	-15.805	0	TRUE
Benign neoplasm of other parts of digestive system	neoplasms	-0.6513	-1.565	0.263	0.466	-1.397	0.521368	0.209088	1.30083	10	5541	11	2453	0.162456	0.481335	not_significant	-0.282856	0.789265	2.854	2.592	3.116	0.133	21.381	0	-0.051	-0.057	-0.045	0.003	-15.696	0	TRUE
Benign neoplasm of pituitary gland and craniopharyngeal duct (pouch)	neoplasms	0.8421	-0.093	1.777	0.477	1.765	2.32124	0.911194	5.91209	27	5524	10	2454	0.0775103	0.333741	not_significant	0.365719	1.11064	2.8623	2.601	3.124	0.133	21.471	0	-0.0513	-0.058	-0.045	0.003	-15.823	0	TRUE
Benign neoplasm of respiratory and intrathoracic organs	neoplasms	-0.0102	-1.407	1.387	0.713	-0.014	0.989852	0.244877	4.00282	10	5541	10	2454	0.988563	0.997615	not_significant	-0.0044298	0.00499563	2.8611	2.6	3.123	0.133	21.452	0	-0.0512	-0.058	-0.045	0.003	-15.785	0	TRUE
Benign neoplasm of skin	neoplasms	-0.8763	-1.043	-0.71	0.085	-10.311	0.41632	0.352396	0.491644	314	5237	318	2146	6.27782e-25	2.50485e-22	con_significant	-0.380572	24.2022	2.9124	2.649	3.176	0.134	21.662	0	-0.0506	-0.057	-0.044	0.003	-15.486	0	TRUE
Benign neoplasm of thyroid glands	neoplasms	-0.3246	-3.136	2.487	1.434	-0.226	0.722816	0.0434563	12.0251	10	5541	10	2454	0.820943	0.953093	not_significant	-0.140972	0.0856868	2.8606	2.599	3.122	0.133	21.445	0	-0.0512	-0.058	-0.045	0.003	-15.777	0	TRUE
Benign neoplasm of unspecified sites	neoplasms	-0.5517	-1.319	0.216	0.392	-1.409	0.57597	0.267403	1.2411	14	5537	15	2449	0.1589	0.477398	not_significant	-0.2396	0.798875	2.8536	2.592	3.115	0.134	21.369	0	-0.051	-0.057	-0.045	0.003	-15.682	0	TRUE
Bipolar	mental disorders	-0.5889	-1.24	0.062	0.332	-1.773	0.554937	0.289384	1.06396	22	5529	17	2447	0.0762144	0.331077	not_significant	-0.255756	1.11796	2.8654	2.604	3.127	0.133	21.472	0	-0.0513	-0.058	-0.045	0.003	-15.789	0	TRUE
Bladder neck obstruction	genitourinary	-0.1445	-1.474	1.185	0.678	-0.213	0.865455	0.229008	3.27069	10	5541	10	2454	0.831269	0.953093	not_significant	-0.0627556	0.0802583	2.8596	2.598	3.121	0.134	21.411	0	-0.0512	-0.058	-0.045	0.003	-15.743	0	TRUE
Blindness and low vision	sense organs	0.4718	-0.35	1.294	0.419	1.125	1.60288	0.704688	3.64735	25	5526	10	2454	0.260498	0.604602	not_significant	0.2049	0.584196	2.8627	2.601	3.124	0.133	21.461	0	-0.0513	-0.058	-0.045	0.003	-15.806	0	TRUE
Blister	injuries & poisonings	0.3654	-1.848	2.579	1.13	0.324	1.44109	0.157552	13.1839	10	5541	10	2454	0.746303	0.91749	not_significant	0.158691	0.127085	2.8604	2.599	3.122	0.133	21.444	0	-0.0512	-0.058	-0.045	0.003	-15.78	0	TRUE
Blood in stool	digestive	-0.1201	-0.604	0.364	0.247	-0.487	0.886832	0.546621	1.43907	49	5502	27	2437	0.626499	0.883298	not_significant	-0.0521588	0.203079	2.8605	2.599	3.122	0.133	21.449	0	-0.0512	-0.058	-0.045	0.003	-15.768	0	TRUE
Bone cancer	neoplasms	1.7503	-0.323	3.824	1.058	1.655	5.75633	0.723974	45.787	15	5536	10	2454	0.0979909	0.379596	not_significant	0.760146	1.00881	2.8558	2.594	3.117	0.134	21.391	0	-0.0512	-0.058	-0.045	0.003	-15.745	0	TRUE
Bone marrow or stem cell transplant	neoplasms	1.4193	-0.064	2.902	0.757	1.876	4.13423	0.938005	18.2105	23	5528	10	2454	0.0606523	0.286959	not_significant	0.616394	1.21715	2.8524	2.591	3.114	0.134	21.351	0	-0.0511	-0.057	-0.045	0.003	-15.715	0	TRUE
Broken tooth	injuries & poisonings	0.1233	-2.327	2.574	1.25	0.099	1.13122	0.0975881	13.1182	10	5541	10	2454	0.921432	0.976065	not_significant	0.0535485	0.0355369	2.8612	2.6	3.123	0.133	21.452	0	-0.0513	-0.058	-0.045	0.003	-15.785	0	TRUE
Bronchiectasis	respiratory	1.2748	0.039	2.511	0.631	2.021	3.57799	1.03977	12.3172	22	5529	10	2454	0.0432624	0.22822	not_significant	0.553639	1.36389	2.8624	2.601	3.124	0.134	21.44	0	-0.0513	-0.058	-0.045	0.003	-15.799	0	TRUE
Bronchitis	respiratory	-0.5251	-0.997	-0.053	0.241	-2.179	0.591496	0.368985	0.94838	38	5513	37	2427	0.0292972	0.173608	not_significant	-0.228048	1.53317	2.8462	2.584	3.108	0.134	21.311	0	-0.0507	-0.057	-0.044	0.003	-15.589	0	TRUE
Bronchopneumonia and lung abscess	respiratory	-2.4563	-4.617	-0.295	1.103	-2.228	0.0857516	0.0098824	0.744532	10	5541	10	2454	0.0258992	0.161465	not_significant	-1.06676	1.58671	2.864	2.602	3.126	0.133	21.464	0	-0.0513	-0.058	-0.045	0.003	-15.787	0	TRUE
Bundle branch block	circulatory system	-1.2451	-2.696	0.205	0.74	-1.682	0.287912	0.0674749	1.22753	10	5541	10	2454	0.0924998	0.37131	not_significant	-0.54074	1.03386	2.8576	2.596	3.119	0.134	21.405	0	-0.0511	-0.057	-0.045	0.003	-15.729	0	TRUE
Burns		0.3225	-0.64	1.285	0.491	0.657	1.38057	0.527292	3.61467	17	5534	10	2454	0.511426	0.832121	not_significant	0.14006	0.291217	2.8613	2.6	3.123	0.133	21.453	0	-0.0513	-0.058	-0.045	0.003	-15.792	0	TRUE
Bursitis	musculoskeletal	-0.5902	-1.051	-0.13	0.235	-2.512	0.554216	0.349588	0.878095	39	5512	38	2426	0.0120174	0.095067	not_significant	-0.256321	1.92019	2.8498	2.588	3.111	0.133	21.354	0	-0.0508	-0.057	-0.044	0.003	-15.627	0	TRUE
Bursitis disorders	musculoskeletal	-0.0097	-1.426	1.407	0.723	-0.013	0.990347	0.240268	4.08369	10	5541	10	2454	0.989281	0.997615	not_significant	-0.00421266	0.0046804	2.8611	2.6	3.123	0.133	21.452	0	-0.0512	-0.058	-0.045	0.003	-15.784	0	TRUE
Cachexia	endocrine/metabolic	-0.7878	-2.986	1.41	1.121	-0.702	0.454844	0.050489	4.09596	10	5541	10	2454	0.482409	0.807735	not_significant	-0.342137	0.316585	2.8606	2.599	3.122	0.133	21.451	0	-0.0512	-0.058	-0.045	0.003	-15.78	0	TRUE
Calcaneal spur; Exostosis NOS	musculoskeletal	-0.3053	-1.135	0.524	0.423	-0.722	0.736902	0.321422	1.68877	14	5537	10	2454	0.470596	0.799085	not_significant	-0.13259	0.327352	2.8598	2.598	3.121	0.133	21.44	0	-0.0512	-0.058	-0.045	0.003	-15.763	0	TRUE
Calculus of bile duct	digestive	-0.7478	-2.023	0.528	0.651	-1.149	0.473407	0.132258	1.69554	10	5541	10	2454	0.250591	0.592802	not_significant	-0.324765	0.601034	2.861	2.6	3.122	0.133	21.451	0	-0.0512	-0.058	-0.045	0.003	-15.776	0	TRUE
Calculus of kidney	genitourinary	-0.1229	-0.489	0.243	0.187	-0.658	0.884352	0.613239	1.27507	82	5469	51	2413	0.510456	0.832121	not_significant	-0.0533748	0.292041	2.8571	2.595	3.119	0.134	21.396	0	-0.0511	-0.057	-0.045	0.003	-15.695	0	TRUE
Calculus of lower urinary tract	genitourinary	0.0629	-1.517	1.642	0.806	0.078	1.06492	0.219369	5.16549	10	5541	10	2454	0.937779	0.980823	not_significant	0.0273171	0.0278996	2.8613	2.6	3.123	0.133	21.448	0	-0.0513	-0.058	-0.045	0.003	-15.781	0	TRUE
Calculus of ureter	genitourinary	-0.6095	-1.314	0.095	0.359	-1.696	0.543623	0.268743	1.09966	17	5534	16	2448	0.0899581	0.366258	not_significant	-0.264702	1.04596	2.8585	2.597	3.12	0.133	21.424	0	-0.0511	-0.057	-0.045	0.003	-15.734	0	TRUE
Cancer of bladder	neoplasms	-1.2456	-2.711	0.219	0.747	-1.667	0.287768	0.0664703	1.24483	10	5541	10	2454	0.0955986	0.373959	not_significant	-0.540957	1.01955	2.8585	2.597	3.12	0.134	21.402	0	-0.0511	-0.058	-0.045	0.003	-15.729	0	TRUE
Cancer of brain	neoplasms	-0.2163	-1.354	0.921	0.58	-0.373	0.805494	0.258205	2.5118	10	5541	10	2454	0.709348	0.908296	not_significant	-0.0939379	0.149141	2.8608	2.599	3.122	0.133	21.45	0	-0.0512	-0.058	-0.045	0.003	-15.779	0	TRUE
Cancer of bronchus; lung	neoplasms	0.3603	-1.046	1.766	0.717	0.502	1.43376	0.35134	5.84742	10	5541	10	2454	0.615467	0.879134	not_significant	0.156476	0.210795	2.8626	2.601	3.124	0.133	21.457	0	-0.0513	-0.058	-0.045	0.003	-15.793	0	TRUE
Cancer of connective tissue	neoplasms	0.4526	-0.714	1.619	0.595	0.761	1.5724	0.489682	5.04804	14	5537	10	2454	0.446922	0.784406	not_significant	0.196562	0.349769	2.861	2.599	3.122	0.133	21.444	0	-0.0513	-0.058	-0.045	0.003	-15.785	0	TRUE
Cancer of eye	neoplasms	-1.2373	-3.671	1.197	1.242	-0.996	0.290167	0.025451	3.31017	10	5541	10	2454	0.31908	0.673332	not_significant	-0.537353	0.496101	2.8597	2.598	3.121	0.133	21.44	0	-0.0512	-0.058	-0.045	0.003	-15.769	0	TRUE
Cancer of nasopharynx	neoplasms	-1.4639	-3.883	0.955	1.234	-1.186	0.231332	0.020589	2.59867	10	5541	10	2454	0.235587	0.582514	not_significant	-0.635764	0.627848	2.8614	2.6	3.123	0.133	21.453	0	-0.0512	-0.058	-0.045	0.003	-15.782	0	TRUE
Cancer of oropharynx	neoplasms	0.2656	-2.554	3.086	1.439	0.185	1.30421	0.07777	21.8893	10	5541	10	2454	0.853562	0.954959	not_significant	0.115349	0.0687647	2.8621	2.601	3.124	0.133	21.44	0	-0.0513	-0.058	-0.045	0.003	-15.777	0	TRUE
Cancer of prostate	neoplasms	1.7019	0.676	2.728	0.524	3.25	5.48436	1.966	15.3023	17	5534	10	2454	0.00115377	0.0151765	mi_significant	0.739126	2.93788	2.9384	2.673	3.204	0.135	21.687	0	-0.0533	-0.06	-0.047	0.003	-16.128	0	TRUE
Cancer of stomach	neoplasms	-1.0089	-3.017	0.999	1.025	-0.985	0.36462	0.0489478	2.71556	10	5541	10	2454	0.32477	0.675844	not_significant	-0.43816	0.488424	2.8629	2.601	3.124	0.133	21.464	0	-0.0513	-0.058	-0.045	0.003	-15.794	0	TRUE
Cancer of tongue	neoplasms	0.2115	-2.198	2.621	1.229	0.172	1.23553	0.111025	13.7495	10	5541	10	2454	0.863408	0.958318	not_significant	0.0918533	0.0637837	2.8614	2.6	3.123	0.133	21.452	0	-0.0513	-0.058	-0.045	0.003	-15.786	0	TRUE
Cancer, suspected or other	neoplasms	1.0597	-0.037	2.157	0.56	1.894	2.88551	0.963676	8.64516	23	5528	10	2454	0.0582788	0.280159	not_significant	0.460222	1.23449	2.8637	2.602	3.125	0.134	21.448	0	-0.0514	-0.058	-0.045	0.003	-15.807	0	TRUE
Candidiasis	infectious diseases	0.8228	0.062	1.583	0.388	2.121	2.27687	1.06396	4.86954	37	5514	10	2454	0.0339414	0.193466	not_significant	0.357337	1.46927	2.8687	2.607	3.13	0.133	21.491	0	-0.0515	-0.058	-0.045	0.003	-15.854	0	TRUE
Carbuncle and furuncle	dermatologic	0.4022	-0.561	1.365	0.491	0.819	1.49511	0.570638	3.91572	17	5534	10	2454	0.412996	0.753775	not_significant	0.174673	0.384054	2.8623	2.601	3.124	0.133	21.462	0	-0.0513	-0.058	-0.045	0.003	-15.801	0	TRUE
Carcinoma in situ of skin	neoplasms	0.6139	-1.813	3.041	1.238	0.496	1.84762	0.163164	20.9262	10	5541	10	2454	0.620037	0.879331	not_significant	0.266613	0.207582	2.8634	2.602	3.125	0.133	21.455	0	-0.0513	-0.058	-0.045	0.003	-15.792	0	TRUE
Cardiac and circulatory congenital anomalies	congenital anomalies	-0.8789	-2.432	0.674	0.792	-1.109	0.415239	0.0878609	1.96207	10	5541	10	2454	0.267377	0.615169	not_significant	-0.381701	0.572876	2.8593	2.598	3.121	0.133	21.435	0	-0.0512	-0.058	-0.045	0.003	-15.761	0	TRUE
Cardiac conduction disorders	circulatory system	-0.3388	-1.243	0.565	0.461	-0.735	0.712625	0.288517	1.75945	11	5540	10	2454	0.462635	0.793771	not_significant	-0.147139	0.334761	2.8572	2.596	3.119	0.134	21.403	0	-0.0511	-0.057	-0.045	0.003	-15.725	0	TRUE
Cardiac congenital anomalies	congenital anomalies	-1.1207	-2.375	0.134	0.64	-1.751	0.326051	0.0930145	1.14339	10	5541	10	2454	0.0800229	0.337358	not_significant	-0.486714	1.09679	2.8567	2.595	3.118	0.133	21.416	0	-0.0511	-0.057	-0.045	0.003	-15.733	0	TRUE
Cardiac shunt/ heart septal defect	congenital anomalies	-1.1394	-2.424	0.145	0.655	-1.739	0.320011	0.0885666	1.15604	10	5541	10	2454	0.0820296	0.342123	not_significant	-0.494835	1.08603	2.861	2.6	3.122	0.133	21.449	0	-0.0512	-0.058	-0.045	0.003	-15.77	0	TRUE
Cardiogenic shock	symptoms	-1.2056	-3.201	0.79	1.018	-1.184	0.299512	0.0407215	2.2034	10	5541	10	2454	0.236304	0.582514	not_significant	-0.523585	0.626528	2.865	2.603	3.127	0.133	21.473	0	-0.0513	-0.058	-0.045	0.003	-15.806	0	TRUE
Cardiomegaly	circulatory system	-0.1831	-0.716	0.35	0.272	-0.673	0.832685	0.488703	1.41907	36	5515	26	2438	0.500956	0.828238	not_significant	-0.0795193	0.300201	2.8563	2.594	3.118	0.134	21.384	0	-0.0511	-0.057	-0.045	0.003	-15.695	0	TRUE
Cataract	sense organs	0.3732	-0.447	1.193	0.418	0.892	1.45237	0.639544	3.29696	17	5534	11	2453	0.372419	0.716373	not_significant	0.162079	0.428968	2.873	2.61	3.136	0.134	21.438	0	-0.0516	-0.058	-0.045	0.003	-15.791	0	TRUE
Celiac disease	digestive	-0.3927	-1.345	0.56	0.486	-0.808	0.675231	0.26054	1.75067	10	5541	10	2454	0.419043	0.763292	not_significant	-0.170547	0.377742	2.8595	2.598	3.121	0.133	21.437	0	-0.0512	-0.058	-0.045	0.003	-15.761	0	TRUE
Cellulitis and abscess of arm/hand	dermatologic	0.0167	-0.918	0.952	0.477	0.035	1.01684	0.399317	2.59089	14	5537	10	2454	0.972057	0.992792	not_significant	0.00725272	0.0123082	2.8612	2.6	3.123	0.133	21.451	0	-0.0512	-0.058	-0.045	0.003	-15.782	0	TRUE
Cellulitis and abscess of face/neck	dermatologic	-0.6123	-1.439	0.214	0.422	-1.452	0.542103	0.237165	1.23862	13	5538	11	2453	0.146493	0.455877	not_significant	-0.265919	0.834184	2.8617	2.6	3.123	0.133	21.457	0	-0.0512	-0.058	-0.045	0.003	-15.775	0	TRUE
Cellulitis and abscess of fingers/toes	dermatologic	-0.6606	-1.198	-0.123	0.274	-2.408	0.516541	0.301797	0.884264	28	5523	29	2435	0.0160211	0.118378	not_significant	-0.286895	1.79531	2.8528	2.591	3.114	0.133	21.37	0	-0.0509	-0.057	-0.045	0.003	-15.658	0	TRUE
Cellulitis and abscess of foot, toe	dermatologic	0.3409	-1.386	2.068	0.881	0.387	1.40621	0.250074	7.90899	10	5541	10	2454	0.698813	0.908296	not_significant	0.148051	0.155639	2.8625	2.601	3.124	0.133	21.453	0	-0.0513	-0.058	-0.045	0.003	-15.789	0	TRUE
Cellulitis and abscess of leg, except foot	dermatologic	-0.1819	-0.902	0.539	0.368	-0.495	0.833685	0.405757	1.71429	21	5530	12	2452	0.620747	0.879331	not_significant	-0.0789982	0.207085	2.8611	2.6	3.123	0.133	21.453	0	-0.0512	-0.058	-0.045	0.003	-15.779	0	TRUE
Cellulitis and abscess of oral soft tissues	digestive	-0.8817	-2.51	0.747	0.831	-1.061	0.414078	0.0812682	2.11066	10	5541	10	2454	0.288529	0.63604	not_significant	-0.382917	0.53981	2.8625	2.601	3.124	0.133	21.46	0	-0.0513	-0.058	-0.045	0.003	-15.789	0	TRUE
Cellulitis and abscess of trunk	dermatologic	-1.1248	-1.87	-0.38	0.38	-2.958	0.324717	0.154124	0.683861	12	5539	18	2446	0.00309684	0.0316831	con_significant	-0.488494	2.50908	2.8595	2.598	3.121	0.133	21.43	0	-0.0511	-0.057	-0.045	0.003	-15.728	0	TRUE
Central/nonobstroctive sleep apnea	neurological	0.8997	-0.474	2.274	0.701	1.283	2.45887	0.622507	9.7182	10	5541	10	2454	0.199381	0.533913	not_significant	0.390735	0.700316	2.8707	2.609	3.133	0.134	21.481	0	-0.0515	-0.058	-0.045	0.003	-15.83	0	TRUE
Cerebral aneurysm	circulatory system	-1.3817	-3.126	0.363	0.89	-1.552	0.251151	0.043893	1.43764	10	5541	10	2454	0.120598	0.419639	not_significant	-0.600065	0.91866	2.8604	2.599	3.122	0.133	21.438	0	-0.0512	-0.058	-0.045	0.003	-15.764	0	TRUE
Cerebral artery occlusion, with cerebral infarction	circulatory system	-0.6289	-1.455	0.198	0.422	-1.492	0.533178	0.2334	1.21896	12	5539	12	2452	0.135826	0.438843	not_significant	-0.273128	0.867016	2.8578	2.596	3.119	0.133	21.422	0	-0.0511	-0.057	-0.045	0.003	-15.737	0	TRUE
Cerebral cysts	neurological	1.0168	-1.127	3.161	1.094	0.93	2.76433	0.324004	23.5942	10	5541	10	2454	0.352549	0.696371	not_significant	0.441591	0.452781	2.8609	2.599	3.122	0.133	21.447	0	-0.0513	-0.058	-0.045	0.003	-15.786	0	TRUE
Cerebral edema and compression of brain	neurological	0.2051	-0.962	1.373	0.596	0.344	1.22765	0.382128	3.94717	11	5540	10	2454	0.73057	0.908296	not_significant	0.0890738	0.136338	2.8609	2.599	3.122	0.133	21.449	0	-0.0512	-0.058	-0.045	0.003	-15.785	0	TRUE
Certain early complications of trauma or procedure	injuries & poisonings	-0.226	-1.808	1.356	0.807	-0.28	0.797718	0.163982	3.88064	10	5541	10	2454	0.779424	0.934887	not_significant	-0.0981506	0.108226	2.8605	2.599	3.122	0.133	21.443	0	-0.0512	-0.058	-0.045	0.003	-15.774	0	TRUE
Cervical radiculitis	symptoms	-0.4596	-0.882	-0.037	0.216	-2.132	0.631536	0.413954	0.963676	51	5500	41	2423	0.0330447	0.191084	not_significant	-0.199602	1.4809	2.856	2.594	3.118	0.133	21.406	0	-0.051	-0.057	-0.045	0.003	-15.687	0	TRUE
Cervicalgia	symptoms	-0.4004	-0.641	-0.16	0.123	-3.267	0.670052	0.526765	0.852144	177	5374	123	2341	0.00108756	0.0146271	con_significant	-0.173892	2.96355	2.8632	2.602	3.125	0.133	21.45	0	-0.0509	-0.057	-0.045	0.003	-15.66	0	TRUE
Cervicocranial/Cervicobrachial syndrome		0.6088	-1.73	2.948	1.193	0.51	1.83822	0.177284	19.0678	10	5541	10	2454	0.609969	0.875321	not_significant	0.264398	0.214692	2.8621	2.601	3.124	0.133	21.456	0	-0.0513	-0.058	-0.045	0.003	-15.791	0	TRUE
Changes in skin texture	dermatologic	-0.2993	-1.755	1.156	0.743	-0.403	0.741337	0.172907	3.1772	10	5541	10	2454	0.686985	0.907807	not_significant	-0.129984	0.163053	2.8614	2.6	3.123	0.133	21.454	0	-0.0512	-0.058	-0.045	0.003	-15.785	0	TRUE
Cholangitis	digestive	0.2033	-1.605	2.012	0.923	0.22	1.22544	0.20089	7.47826	10	5541	10	2454	0.825575	0.953093	not_significant	0.0882921	0.0832434	2.8617	2.6	3.123	0.133	21.45	0	-0.0513	-0.058	-0.045	0.003	-15.785	0	TRUE
Cholecystitis without cholelithiasis	digestive	-1.052	-2.093	-0.011	0.531	-1.981	0.349239	0.123317	0.98906	10	5541	10	2454	0.0476429	0.243712	not_significant	-0.456878	1.322	2.8657	2.604	3.127	0.133	21.481	0	-0.0513	-0.058	-0.045	0.003	-15.802	0	TRUE
Cholelithiasis	digestive	0.0213	-0.627	0.669	0.331	0.064	1.02153	0.534192	1.95228	31	5520	14	2450	0.948631	0.985533	not_significant	0.00925047	0.0229025	2.8611	2.6	3.122	0.133	21.451	0	-0.0512	-0.058	-0.045	0.003	-15.785	0	TRUE
Cholelithiasis with acute cholecystitis	digestive	-0.2022	-1.655	1.25	0.741	-0.273	0.816932	0.191092	3.49034	10	5541	10	2454	0.784975	0.93774	not_significant	-0.0878143	0.105144	2.8611	2.6	3.122	0.133	21.451	0	-0.0512	-0.058	-0.045	0.003	-15.783	0	TRUE
Cholelithiasis with other cholecystitis	digestive	0.174	-0.895	1.243	0.546	0.319	1.19006	0.408608	3.466	12	5539	10	2454	0.749745	0.91749	not_significant	0.0755672	0.125086	2.8614	2.6	3.123	0.133	21.452	0	-0.0513	-0.058	-0.045	0.003	-15.787	0	TRUE
Cholesteatoma	sense organs	-0.4313	-1.604	0.742	0.598	-0.721	0.649664	0.201091	2.10013	10	5541	10	2454	0.471087	0.799085	not_significant	-0.187311	0.326899	2.8614	2.6	3.123	0.133	21.452	0	-0.0512	-0.058	-0.045	0.003	-15.781	0	TRUE
Cholesterolosis of gallbladder	digestive	-0.1048	-0.965	0.755	0.439	-0.239	0.900505	0.380983	2.12761	16	5535	10	2454	0.811187	0.951952	not_significant	-0.0455141	0.0908791	2.8614	2.6	3.123	0.133	21.453	0	-0.0512	-0.058	-0.045	0.003	-15.785	0	TRUE
Chondrocalcinosis	endocrine/metabolic	-0.2221	-3.001	2.557	1.418	-0.157	0.800835	0.0497373	12.8971	10	5541	10	2454	0.875503	0.958318	not_significant	-0.0964568	0.0577423	2.8607	2.599	3.122	0.133	21.444	0	-0.0512	-0.058	-0.045	0.003	-15.777	0	TRUE
Chondromalacia		-0.6404	-1.441	0.16	0.408	-1.569	0.527082	0.236691	1.17351	13	5538	12	2452	0.116726	0.410943	not_significant	-0.278122	0.932834	2.8607	2.599	3.122	0.133	21.444	0	-0.0512	-0.058	-0.045	0.003	-15.761	0	TRUE
Chromosomal anomalies	congenital anomalies	1.5223	0.341	2.704	0.603	2.525	4.58275	1.40635	14.9394	43	5508	10	2454	0.0115706	0.0923334	not_significant	0.661126	1.93664	2.838	2.576	3.1	0.134	21.206	0	-0.0508	-0.057	-0.044	0.003	-15.598	0	TRUE
Chromosomal anomalies and genetic disorders	congenital anomalies	0.6975	-0.876	2.271	0.803	0.869	2.00872	0.416445	9.68909	10	5541	10	2454	0.385033	0.731436	not_significant	0.30292	0.414502	2.8616	2.6	3.123	0.133	21.454	0	-0.0513	-0.058	-0.045	0.003	-15.793	0	TRUE
Chronic airway obstruction	respiratory	0.1162	-0.927	1.159	0.532	0.218	1.12322	0.395739	3.18674	11	5540	10	2454	0.827156	0.953093	not_significant	0.050465	0.0824125	2.8621	2.6	3.124	0.133	21.446	0	-0.0513	-0.058	-0.045	0.003	-15.78	0	TRUE
Chronic bronchitis	respiratory	-2.6333	-4.781	-0.486	1.096	-2.404	0.071841	0.00838761	0.615082	10	5541	10	2454	0.0162356	0.119227	not_significant	-1.14363	1.78953	2.8636	2.602	3.125	0.133	21.457	0	-0.0513	-0.058	-0.045	0.003	-15.777	0	TRUE
Chronic cystitis	genitourinary	0.3425	-2.751	3.436	1.578	0.217	1.40846	0.063864	31.0625	10	5541	10	2454	0.828165	0.953093	not_significant	0.148746	0.0818831	2.8622	2.601	3.124	0.133	21.446	0	-0.0513	-0.058	-0.045	0.003	-15.782	0	TRUE
Chronic dermatitis due to solar radiation	dermatologic	-1.424	-2.484	-0.364	0.541	-2.632	0.240749	0.0834089	0.694891	10	5541	12	2452	0.00848047	0.0730297	not_significant	-0.618435	2.07158	2.852	2.591	3.114	0.133	21.378	0	-0.0509	-0.057	-0.045	0.003	-15.682	0	TRUE
Chronic fatigue syndrome	symptoms	-0.56	-1.544	0.424	0.502	-1.115	0.571209	0.213525	1.52806	10	5541	10	2454	0.264695	0.61166	not_significant	-0.243205	0.577254	2.8598	2.598	3.121	0.133	21.442	0	-0.0512	-0.058	-0.045	0.003	-15.763	0	TRUE
Chronic glomerulonephritis, NOS	genitourinary	-0.1998	-2.671	2.272	1.261	-0.158	0.818895	0.069183	9.69878	10	5541	10	2454	0.874119	0.958318	not_significant	-0.086772	0.0584297	2.8612	2.6	3.123	0.133	21.453	0	-0.0512	-0.058	-0.045	0.003	-15.786	0	TRUE
Chronic hepatitis	infectious diseases	0.1702	-1.194	1.535	0.696	0.244	1.18554	0.303007	4.64133	10	5541	10	2454	0.806883	0.948013	not_significant	0.0739169	0.0931893	2.8609	2.6	3.122	0.133	21.45	0	-0.0512	-0.058	-0.045	0.003	-15.785	0	TRUE
Chronic interstitial cystitis	genitourinary	0.2317	-1.557	2.021	0.913	0.254	1.26074	0.210767	7.54587	10	5541	10	2454	0.799583	0.946533	not_significant	0.100626	0.0971365	2.8611	2.6	3.123	0.133	21.454	0	-0.0513	-0.058	-0.045	0.003	-15.788	0	TRUE
Chronic kidney disease, Stage I or II	genitourinary	-0.4818	-1.146	0.182	0.339	-1.423	0.617671	0.317906	1.19961	20	5531	18	2446	0.154874	0.470519	not_significant	-0.209243	0.810021	2.8557	2.594	3.117	0.133	21.399	0	-0.0511	-0.057	-0.045	0.003	-15.708	0	TRUE
Chronic Kidney Disease, Stage III	genitourinary	0.1035	-0.785	0.992	0.453	0.228	1.10905	0.45612	2.69662	16	5535	10	2454	0.819433	0.953093	not_significant	0.0449495	0.0864863	2.8617	2.6	3.123	0.133	21.454	0	-0.0513	-0.058	-0.045	0.003	-15.786	0	TRUE
Chronic Kidney Disease, Stage IV	genitourinary	1.2143	-1	3.429	1.13	1.075	3.36794	0.367879	30.8458	10	5541	10	2454	0.282477	0.632009	not_significant	0.527364	0.549017	2.8646	2.603	3.126	0.133	21.468	0	-0.0514	-0.058	-0.045	0.003	-15.809	0	TRUE
Chronic laryngitis	respiratory	-0.6321	-3.406	2.142	1.416	-0.447	0.531475	0.0331736	8.51645	10	5541	10	2454	0.655194	0.894826	not_significant	-0.274518	0.18363	2.8609	2.599	3.122	0.133	21.45	0	-0.0512	-0.058	-0.045	0.003	-15.782	0	TRUE
Chronic lymphocytic thyroiditis	endocrine/metabolic	0.1665	-0.709	1.042	0.447	0.373	1.18116	0.492136	2.83488	20	5531	10	2454	0.709296	0.908296	not_significant	0.07231	0.149172	2.86	2.599	3.121	0.133	21.44	0	-0.0512	-0.058	-0.045	0.003	-15.781	0	TRUE
Chronic osteomyelitis	musculoskeletal	1.5143	-0.606	3.635	1.082	1.4	4.54624	0.545529	37.9019	10	5541	10	2454	0.161585	0.479945	not_significant	0.657652	0.791598	2.8627	2.601	3.124	0.133	21.446	0	-0.0513	-0.058	-0.045	0.003	-15.793	0	TRUE
Chronic pain	neurological	-0.7396	-0.928	-0.551	0.096	-7.681	0.477305	0.395344	0.576373	250	5301	233	2231	1.57774e-14	2.69793e-12	con_significant	-0.321204	13.802	2.8758	2.613	3.138	0.134	21.476	0	-0.0504	-0.057	-0.044	0.003	-15.459	0	TRUE
Chronic pain syndrome	neurological	0.2222	-0.948	1.393	0.597	0.372	1.24882	0.387515	4.02691	11	5540	10	2454	0.709872	0.908296	not_significant	0.0965002	0.14882	2.8609	2.599	3.122	0.133	21.449	0	-0.0513	-0.058	-0.045	0.003	-15.786	0	TRUE
Chronic pancreatitis	digestive	-0.384	-1.611	0.843	0.626	-0.613	0.681131	0.199688	2.32333	10	5541	10	2454	0.539607	0.846755	not_significant	-0.166769	0.267923	2.8597	2.598	3.121	0.133	21.438	0	-0.0512	-0.058	-0.045	0.003	-15.765	0	TRUE
Chronic pericarditis	circulatory system	-0.7601	-2.903	1.383	1.093	-0.695	0.46762	0.0548584	3.98684	10	5541	10	2454	0.48692	0.814027	not_significant	-0.330107	0.312542	2.8612	2.6	3.123	0.133	21.447	0	-0.0512	-0.058	-0.045	0.003	-15.779	0	TRUE
Chronic pharyngitis and nasopharyngitis	respiratory	0.0416	-0.484	0.567	0.268	0.155	1.04248	0.616313	1.76297	45	5506	22	2442	0.87685	0.958318	not_significant	0.0180667	0.0570747	2.8614	2.6	3.123	0.133	21.452	0	-0.0513	-0.058	-0.045	0.003	-15.782	0	TRUE
Chronic prostatitis	genitourinary	0.5736	-0.757	1.904	0.679	0.845	1.77464	0.469072	6.71269	10	5541	10	2454	0.39807	0.744671	not_significant	0.249111	0.40004	2.8636	2.602	3.125	0.133	21.462	0	-0.0513	-0.058	-0.045	0.003	-15.801	0	TRUE
Chronic pulmonary heart disease	circulatory system	0.5733	-0.399	1.545	0.496	1.156	1.77411	0.670991	4.68797	15	5536	10	2454	0.247693	0.588271	not_significant	0.248981	0.606086	2.8721	2.61	3.134	0.134	21.481	0	-0.0516	-0.058	-0.045	0.003	-15.83	0	TRUE
Chronic renal failure [CKD]	genitourinary	0.3785	-0.222	0.979	0.306	1.236	1.46009	0.800915	2.66179	39	5512	18	2446	0.216543	0.559049	not_significant	0.16438	0.664457	2.8727	2.611	3.135	0.134	21.49	0	-0.0516	-0.058	-0.045	0.003	-15.839	0	TRUE
Chronic sinusitis	respiratory	-0.6831	-0.952	-0.414	0.137	-4.976	0.505049	0.385968	0.661001	119	5432	110	2354	6.50002e-07	2.28839e-05	con_significant	-0.296667	6.18709	2.8618	2.6	3.124	0.134	21.423	0	-0.0507	-0.057	-0.044	0.003	-15.595	0	TRUE
Chronic tonsillitis and adenoiditis	respiratory	-0.4799	-1.001	0.041	0.266	-1.806	0.618845	0.367512	1.04185	36	5515	25	2439	0.0709644	0.314914	not_significant	-0.208418	1.14896	2.8664	2.605	3.128	0.133	21.482	0	-0.0513	-0.058	-0.045	0.003	-15.794	0	TRUE
Chronic ulcer of leg or foot	dermatologic	1.0495	-0.534	2.633	0.808	1.299	2.85622	0.586255	13.9155	10	5541	10	2454	0.194002	0.527179	not_significant	0.455792	0.712194	2.8678	2.606	3.13	0.134	21.478	0	-0.0514	-0.058	-0.045	0.003	-15.824	0	TRUE
Chronic ulcer of unspecified site	dermatologic	-0.0572	-1.185	1.07	0.575	-0.099	0.944405	0.305746	2.91538	10	5541	10	2454	0.920852	0.976065	not_significant	-0.0248416	0.03581	2.861	2.6	3.122	0.133	21.45	0	-0.0512	-0.058	-0.045	0.003	-15.781	0	TRUE
Chronic venous insufficiency [CVI]	circulatory system	0.7197	-0.646	2.086	0.697	1.033	2.05382	0.524138	8.05264	10	5541	10	2454	0.301756	0.653167	not_significant	0.312562	0.520345	2.8677	2.606	3.129	0.134	21.47	0	-0.0514	-0.058	-0.045	0.003	-15.814	0	TRUE
Circadian rhythm sleep disorder	neurological	-0.3135	-0.905	0.278	0.302	-1.039	0.730884	0.404542	1.32049	29	5522	19	2445	0.298647	0.649964	not_significant	-0.136151	0.524842	2.8609	2.6	3.122	0.133	21.451	0	-0.0512	-0.058	-0.045	0.003	-15.767	0	TRUE
Circulatory disease NEC	circulatory system	-0.9765	-2.183	0.23	0.616	-1.586	0.376627	0.112703	1.2586	10	5541	10	2454	0.112796	0.405121	not_significant	-0.424089	0.947708	2.862	2.601	3.123	0.133	21.459	0	-0.0512	-0.058	-0.045	0.003	-15.781	0	TRUE
Circumscribed scleroderma	dermatologic	-0.7744	-2.752	1.203	1.009	-0.768	0.46098	0.0638001	3.33009	10	5541	10	2454	0.442718	0.782418	not_significant	-0.336318	0.353873	2.8614	2.6	3.123	0.133	21.453	0	-0.0512	-0.058	-0.045	0.003	-15.784	0	TRUE
Cirrhosis of liver without mention of alcohol	digestive	-0.3358	-1.346	0.675	0.516	-0.651	0.714766	0.260279	1.96403	10	5541	10	2454	0.514963	0.83588	not_significant	-0.145836	0.288224	2.8596	2.598	3.121	0.133	21.438	0	-0.0512	-0.058	-0.045	0.003	-15.763	0	TRUE
Colles' fracture		0.305	-1.976	2.586	1.164	0.262	1.35663	0.138623	13.2766	10	5541	10	2454	0.79328	0.944833	not_significant	0.13246	0.100573	2.861	2.6	3.122	0.133	21.451	0	-0.0512	-0.058	-0.045	0.003	-15.785	0	TRUE
Colon cancer	neoplasms	-0.0728	-1.301	1.156	0.627	-0.116	0.929787	0.272259	3.1772	10	5541	10	2454	0.907609	0.97113	not_significant	-0.0316166	0.0421014	2.8611	2.6	3.123	0.133	21.452	0	-0.0512	-0.058	-0.045	0.003	-15.784	0	TRUE
Color vision deficiencies	sense organs	-2.1739	-4.443	0.095	1.157	-1.878	0.113733	0.0117606	1.09966	10	5541	10	2454	0.060368	0.286748	not_significant	-0.944113	1.21919	2.8668	2.605	3.128	0.133	21.482	0	-0.0514	-0.058	-0.045	0.003	-15.813	0	TRUE
Coma	neurological	-1.1705	-4.054	1.713	1.471	-0.796	0.310212	0.0173528	5.54557	10	5541	10	2454	0.426268	0.771925	not_significant	-0.508342	0.370318	2.8626	2.601	3.124	0.133	21.462	0	-0.0513	-0.058	-0.045	0.003	-15.794	0	TRUE
Complex regional/central pain syndrome	neurological	-1.4463	-2.842	-0.051	0.712	-2.031	0.23544	0.0583089	0.950279	10	5541	10	2454	0.0422413	0.227761	not_significant	-0.62812	1.37426	2.8616	2.6	3.123	0.133	21.453	0	-0.0512	-0.058	-0.045	0.003	-15.773	0	TRUE
Complication due to other implant and internal device	injuries & poisonings	0.262	-0.909	1.433	0.597	0.439	1.29953	0.402927	4.19125	12	5539	10	2454	0.660936	0.897618	not_significant	0.113785	0.17984	2.8607	2.599	3.122	0.133	21.446	0	-0.0512	-0.058	-0.045	0.003	-15.784	0	TRUE
Complication of colostomy or enterostomy	injuries & poisonings	-1.3933	-3.894	1.108	1.276	-1.092	0.248255	0.0203637	3.0283	10	5541	10	2454	0.274863	0.626687	not_significant	-0.605103	0.560884	2.8605	2.599	3.122	0.133	21.447	0	-0.0512	-0.058	-0.045	0.003	-15.775	0	TRUE
Complication of internal orthopedic device	injuries & poisonings	-1.0749	-1.78	-0.37	0.36	-2.989	0.341332	0.168638	0.690734	15	5536	18	2446	0.00279678	0.0288598	con_significant	-0.466823	2.55334	2.8699	2.608	3.132	0.133	21.501	0	-0.0513	-0.058	-0.045	0.003	-15.807	0	TRUE
Complication of nervous system device, implant, and graft		0.4398	-1.756	2.636	1.121	0.392	1.5524	0.172734	13.9573	10	5541	10	2454	0.694706	0.908296	not_significant	0.191003	0.158199	2.8604	2.599	3.122	0.133	21.445	0	-0.0512	-0.058	-0.045	0.003	-15.781	0	TRUE
Complications of cardiac/vascular device, implant, and graft	injuries & poisonings	0.2655	-0.684	1.215	0.485	0.548	1.30408	0.504595	3.37029	18	5533	10	2454	0.583778	0.863914	not_significant	0.115305	0.233752	2.8603	2.599	3.122	0.133	21.443	0	-0.0512	-0.058	-0.045	0.003	-15.784	0	TRUE
Complications of surgical and medical procedures		-0.6521	-1.214	-0.09	0.287	-2.275	0.520951	0.297007	0.913931	28	5523	24	2440	0.0229139	0.152273	not_significant	-0.283203	1.6399	2.8638	2.602	3.125	0.133	21.475	0	-0.0512	-0.058	-0.045	0.003	-15.774	0	TRUE
Complications of transplants and reattached limbs	injuries & poisonings	-0.8166	-1.343	-0.291	0.268	-3.043	0.441932	0.261061	0.747516	30	5521	31	2433	0.00234174	0.0251649	con_significant	-0.354645	2.63046	2.8627	2.601	3.124	0.133	21.449	0	-0.0511	-0.057	-0.045	0.003	-15.734	0	TRUE
Concussion	injuries & poisonings	-0.3644	-1.09	0.361	0.37	-0.985	0.694613	0.336216	1.43476	18	5533	14	2450	0.324761	0.675844	not_significant	-0.158257	0.488435	2.8586	2.597	3.12	0.133	21.425	0	-0.0511	-0.058	-0.045	0.003	-15.743	0	TRUE
Conductive hearing loss	sense organs	-0.7669	-1.488	-0.046	0.368	-2.085	0.464451	0.225824	0.955042	15	5536	16	2448	0.0370939	0.207483	not_significant	-0.33306	1.4307	2.8595	2.598	3.121	0.133	21.431	0	-0.0511	-0.057	-0.045	0.003	-15.739	0	TRUE
Congenital anomalies of abdominal wall; diaphram	congenital anomalies	0.636	-2.098	3.37	1.395	0.456	1.88891	0.122702	29.0785	10	5541	10	2454	0.648469	0.892204	not_significant	0.276211	0.188111	2.8629	2.601	3.124	0.133	21.458	0	-0.0513	-0.058	-0.045	0.003	-15.794	0	TRUE
Congenital anomalies of breast	genitourinary	-1.7397	-4.032	0.553	1.17	-1.488	0.175573	0.0177388	1.73846	10	5541	10	2454	0.136879	0.43926	not_significant	-0.755542	0.863664	2.8598	2.598	3.121	0.133	21.44	0	-0.0512	-0.058	-0.045	0.003	-15.766	0	TRUE
Congenital anomalies of face and neck	congenital anomalies	-0.697	-2.093	0.699	0.712	-0.979	0.498077	0.123317	2.01174	10	5541	10	2454	0.327761	0.67643	not_significant	-0.302703	0.484443	2.8608	2.599	3.122	0.133	21.449	0	-0.0512	-0.058	-0.045	0.003	-15.776	0	TRUE
Congenital anomalies of genital organs	congenital anomalies	0.1298	-0.504	0.763	0.323	0.402	1.1386	0.604109	2.1447	42	5509	13	2451	0.687898	0.907807	not_significant	0.0563714	0.162476	2.8579	2.596	3.12	0.134	21.391	0	-0.0512	-0.058	-0.045	0.003	-15.751	0	TRUE
Congenital anomalies of great vessels	congenital anomalies	-0.7371	-2.724	1.249	1.014	-0.727	0.4785	0.0656118	3.48685	10	5541	10	2454	0.467075	0.796424	not_significant	-0.320118	0.330613	2.8611	2.6	3.123	0.133	21.451	0	-0.0512	-0.058	-0.045	0.003	-15.782	0	TRUE
Congenital anomalies of intestine	congenital anomalies	0.4007	-1.178	1.98	0.806	0.497	1.49287	0.307894	7.24274	10	5541	10	2454	0.618894	0.879261	not_significant	0.174022	0.208384	2.8597	2.598	3.121	0.133	21.437	0	-0.0512	-0.058	-0.045	0.003	-15.776	0	TRUE
Congenital anomalies of male genital organs	congenital anomalies	0.0883	-0.462	0.639	0.281	0.314	1.09232	0.630022	1.89459	50	5501	18	2446	0.753196	0.918633	not_significant	0.0383482	0.123092	2.8594	2.598	3.121	0.133	21.421	0	-0.0512	-0.058	-0.045	0.003	-15.772	0	TRUE
Congenital anomalies of mouth/tongue	congenital anomalies	-1.1525	-2.669	0.364	0.774	-1.49	0.315846	0.0693215	1.43907	10	5541	10	2454	0.136323	0.438843	not_significant	-0.500524	0.865432	2.8631	2.602	3.125	0.133	21.462	0	-0.0513	-0.058	-0.045	0.003	-15.79	0	TRUE
Congenital anomalies of muscle, tendon, fascia, and connective tissue	congenital anomalies	-0.8115	-3.642	2.019	1.444	-0.562	0.444191	0.0261999	7.53079	10	5541	10	2454	0.574204	0.858101	not_significant	-0.35243	0.240934	2.8613	2.6	3.123	0.133	21.453	0	-0.0512	-0.058	-0.045	0.003	-15.785	0	TRUE
Congenital anomalies of peripheral vascular system	congenital anomalies	0.6782	-0.583	1.939	0.643	1.054	1.97033	0.558221	6.9518	14	5537	10	2454	0.291784	0.640364	not_significant	0.294539	0.534939	2.8592	2.598	3.121	0.133	21.433	0	-0.0512	-0.058	-0.045	0.003	-15.777	0	TRUE
Congenital anomalies of skin	dermatologic	-0.786	-1.488	-0.084	0.358	-2.196	0.455664	0.225824	0.919431	17	5534	16	2448	0.028122	0.169156	not_significant	-0.341355	1.55095	2.866	2.604	3.128	0.133	21.474	0	-0.0513	-0.058	-0.045	0.003	-15.788	0	TRUE
Congenital anomalies of skull and face bones	congenital anomalies	-1.8023	-4.214	0.61	1.231	-1.464	0.164919	0.0147871	1.84043	10	5541	10	2454	0.14306	0.45206	not_significant	-0.782729	0.844481	2.865	2.604	3.127	0.133	21.473	0	-0.0513	-0.058	-0.045	0.003	-15.805	0	TRUE
Congenital anomalies of the eye	congenital anomalies	0.1908	-2.241	2.622	1.241	0.154	1.21022	0.106352	13.7632	10	5541	10	2454	0.877739	0.958318	not_significant	0.0828634	0.0566348	2.8614	2.6	3.123	0.133	21.452	0	-0.0513	-0.058	-0.045	0.003	-15.786	0	TRUE
Congenital anomalies of upper limb, including shoulder girdle	congenital anomalies	0.1073	-2.332	2.546	1.244	0.086	1.11327	0.0971014	12.756	10	5541	10	2454	0.931282	0.978277	not_significant	0.0465998	0.0309189	2.8612	2.6	3.123	0.133	21.452	0	-0.0512	-0.058	-0.045	0.003	-15.785	0	TRUE
Congenital anomalies of urinary system	congenital anomalies	-0.847	-2.277	0.583	0.73	-1.161	0.428699	0.102592	1.7914	10	5541	10	2454	0.245747	0.587763	not_significant	-0.367847	0.609512	2.8624	2.601	3.124	0.133	21.456	0	-0.0513	-0.058	-0.045	0.003	-15.785	0	TRUE
Congenital anomaly of gallbladder, bile ducts, liver, pancreas	congenital anomalies	-0.7897	-2.778	1.199	1.015	-0.778	0.453981	0.0621627	3.3168	10	5541	10	2454	0.436368	0.776125	not_significant	-0.342962	0.360147	2.8614	2.6	3.123	0.133	21.453	0	-0.0512	-0.058	-0.045	0.003	-15.784	0	TRUE
Congenital cataract and lens anomalies	congenital anomalies	-0.4367	-2.849	1.975	1.231	-0.355	0.646165	0.0579022	7.20662	10	5541	10	2454	0.722722	0.908296	not_significant	-0.189656	0.141028	2.862	2.601	3.123	0.133	21.454	0	-0.0513	-0.058	-0.045	0.003	-15.788	0	TRUE
Congenital deficiency of other clotting factors (including factor VII)	hematopoietic	-0.1329	-2.663	2.397	1.291	-0.103	0.875553	0.0697387	10.9902	10	5541	10	2454	0.917972	0.975854	not_significant	-0.0577177	0.0371708	2.8611	2.6	3.123	0.133	21.452	0	-0.0512	-0.058	-0.045	0.003	-15.785	0	TRUE
Congenital deformities of feet	congenital anomalies	-0.1118	-1.078	0.855	0.493	-0.227	0.894223	0.340275	2.35137	11	5540	10	2454	0.820695	0.953093	not_significant	-0.0485541	0.0858183	2.8605	2.599	3.122	0.133	21.443	0	-0.0512	-0.058	-0.045	0.003	-15.771	0	TRUE
Congenital hip dysplasia and deformity	congenital anomalies	0.2875	-1.996	2.571	1.165	0.247	1.33309	0.135878	13.0789	10	5541	10	2454	0.805065	0.947888	not_significant	0.12486	0.0941691	2.861	2.6	3.122	0.133	21.451	0	-0.0512	-0.058	-0.045	0.003	-15.785	0	TRUE
Congenital musculoskeletal deformities of spine	congenital anomalies	0.1532	-1.526	1.832	0.857	0.179	1.16556	0.217404	6.24637	10	5541	10	2454	0.858048	0.957028	not_significant	0.0665339	0.0664882	2.8611	2.6	3.122	0.133	21.451	0	-0.0512	-0.058	-0.045	0.003	-15.786	0	TRUE
Congenital osteodystrophies	congenital anomalies	-0.9812	-1.612	-0.351	0.322	-3.051	0.374861	0.199488	0.703984	19	5532	22	2442	0.00227957	0.0251649	con_significant	-0.42613	2.64215	2.8678	2.606	3.129	0.134	21.48	0	-0.0513	-0.058	-0.045	0.003	-15.781	0	TRUE
Congestive heart failure (CHF) NOS	circulatory system	-0.0886	-0.754	0.577	0.34	-0.261	0.915212	0.470481	1.78069	24	5527	17	2447	0.794147	0.944925	not_significant	-0.0384785	0.100099	2.8592	2.597	3.121	0.134	21.404	0	-0.0512	-0.058	-0.045	0.003	-15.728	0	TRUE
Conjunctivitis, infectious	sense organs	-0.576	-0.954	-0.199	0.193	-2.991	0.562142	0.385197	0.81955	62	5489	52	2412	0.0027846	0.0288598	con_significant	-0.250154	2.55524	2.8614	2.6	3.123	0.133	21.453	0	-0.051	-0.057	-0.045	0.003	-15.715	0	TRUE
Conjunctivitis, noninfectious	sense organs	-1.0936	-3.872	1.685	1.417	-0.772	0.335008	0.0208167	5.39245	10	5541	10	2454	0.440404	0.779828	not_significant	-0.474944	0.356148	2.8626	2.601	3.124	0.133	21.459	0	-0.0513	-0.058	-0.045	0.003	-15.792	0	TRUE
Constipation	digestive	0.242	-0.111	0.595	0.18	1.343	1.27379	0.894939	1.81303	126	5425	45	2419	0.179426	0.512022	not_significant	0.105099	0.746115	2.8583	2.597	3.12	0.133	21.42	0	-0.0513	-0.058	-0.045	0.003	-15.793	0	TRUE
Contact and allergic dermatitis of eyelid	dermatologic	0.6302	-1.79	3.05	1.235	0.51	1.87799	0.16696	21.1153	10	5541	10	2454	0.609835	0.875321	not_significant	0.273692	0.214787	2.8635	2.602	3.125	0.133	21.455	0	-0.0513	-0.058	-0.045	0.003	-15.792	0	TRUE
Contact dermatitis and other eczema due to plants [except food]	dermatologic	-1.1212	-1.742	-0.501	0.317	-3.541	0.325888	0.17517	0.605924	18	5533	25	2439	0.00039839	0.00627464	con_significant	-0.486931	3.39969	2.8652	2.604	3.127	0.134	21.461	0	-0.0512	-0.058	-0.045	0.003	-15.751	0	TRUE
Contracture of joint	musculoskeletal	-0.8033	-1.798	0.192	0.508	-1.582	0.447849	0.16563	1.21167	10	5541	10	2454	0.113626	0.405121	not_significant	-0.348869	0.944523	2.8624	2.601	3.124	0.133	21.462	0	-0.0512	-0.058	-0.045	0.003	-15.783	0	TRUE
Contracture of palmar fascia [Dupuytren's disease]	musculoskeletal	-0.8582	-2.003	0.287	0.584	-1.469	0.423924	0.13493	1.33242	10	5541	10	2454	0.141771	0.450133	not_significant	-0.372712	0.848412	2.8535	2.592	3.115	0.133	21.381	0	-0.051	-0.057	-0.045	0.003	-15.699	0	TRUE
Contusion	injuries & poisonings	-0.7487	-1.063	-0.434	0.161	-4.664	0.472981	0.345418	0.647912	84	5467	83	2381	3.09652e-06	9.75405e-05	con_significant	-0.325156	5.50913	2.8611	2.599	3.123	0.134	21.424	0	-0.0508	-0.057	-0.044	0.003	-15.629	0	TRUE
Convulsions	neurological	-0.7186	-1.306	-0.131	0.3	-2.397	0.487434	0.270901	0.877218	24	5527	23	2441	0.0165277	0.119901	not_significant	-0.312084	1.78179	2.8615	2.6	3.123	0.133	21.455	0	-0.0511	-0.058	-0.045	0.003	-15.752	0	TRUE
Corneal degenerations	sense organs	0.157	-1.392	1.706	0.79	0.199	1.17	0.248578	5.50689	10	5541	10	2454	0.842484	0.954959	not_significant	0.0681842	0.0744383	2.8619	2.6	3.123	0.133	21.45	0	-0.0513	-0.058	-0.045	0.003	-15.784	0	TRUE
Corneal dystrophy	sense organs	0.3874	-1.885	2.66	1.16	0.334	1.47315	0.151829	14.2963	10	5541	10	2454	0.738325	0.912049	not_significant	0.168246	0.131752	2.8611	2.6	3.123	0.133	21.452	0	-0.0513	-0.058	-0.045	0.003	-15.787	0	TRUE
Corneal opacity	sense organs	-0.104	-1.41	1.202	0.666	-0.156	0.901225	0.244143	3.32676	10	5541	10	2454	0.8759	0.958318	not_significant	-0.0451666	0.0575455	2.8607	2.599	3.122	0.133	21.444	0	-0.0512	-0.058	-0.045	0.003	-15.775	0	TRUE
Corneal opacity and other disorders of cornea	sense organs	0.0453	-2.23	2.321	1.161	0.039	1.04634	0.107528	10.1859	10	5541	10	2454	0.968872	0.992078	not_significant	0.0196735	0.0137337	2.861	2.6	3.122	0.133	21.448	0	-0.0512	-0.058	-0.045	0.003	-15.783	0	TRUE
Corneal ulcer	sense organs	-1.1511	-2.978	0.676	0.932	-1.235	0.316289	0.0508945	1.966	10	5541	10	2454	0.216804	0.559049	not_significant	-0.499916	0.663932	2.861	2.6	3.122	0.133	21.451	0	-0.0512	-0.058	-0.045	0.003	-15.778	0	TRUE
Corns and callosities	dermatologic	-0.5174	-1.15	0.115	0.323	-1.602	0.596068	0.316637	1.12187	22	5529	18	2446	0.109067	0.397339	not_significant	-0.224704	0.962306	2.8603	2.599	3.122	0.133	21.446	0	-0.0512	-0.058	-0.045	0.003	-15.755	0	TRUE
Coronary atherosclerosis	circulatory system	0.2255	-0.241	0.692	0.238	0.948	1.25295	0.785842	1.99771	52	5499	33	2431	0.343021	0.69124	not_significant	0.0979334	0.464679	2.8783	2.614	3.142	0.135	21.38	0	-0.0517	-0.058	-0.045	0.003	-15.738	0	TRUE
Costochondritis		0.0693	-1.005	1.143	0.548	0.126	1.07176	0.366045	3.13616	12	5539	10	2454	0.899409	0.969031	not_significant	0.0300966	0.0460426	2.8611	2.6	3.122	0.133	21.451	0	-0.0512	-0.058	-0.045	0.003	-15.785	0	TRUE
Cough	respiratory	-0.4209	-0.592	-0.25	0.087	-4.825	0.656456	0.55322	0.778801	364	5187	261	2203	1.40187e-06	4.79438e-05	con_significant	-0.182795	5.85329	2.8491	2.587	3.111	0.134	21.331	0	-0.0501	-0.056	-0.044	0.003	-15.363	0	TRUE
Cramp of limb		0.8874	-0.246	2.02	0.578	1.535	2.42881	0.781922	7.53832	14	5537	10	2454	0.124741	0.421795	not_significant	0.385393	0.90399	2.8712	2.609	3.133	0.134	21.488	0	-0.0515	-0.058	-0.045	0.003	-15.84	0	TRUE
Crushing injury		-0.1589	-1.618	1.3	0.744	-0.213	0.853082	0.198295	3.6693	10	5541	10	2454	0.830969	0.953093	not_significant	-0.0690094	0.0804152	2.8613	2.6	3.123	0.133	21.453	0	-0.0512	-0.058	-0.045	0.003	-15.785	0	TRUE
Crushing or internal injury to organs		-0.8549	-1.818	0.108	0.491	-1.74	0.425326	0.16235	1.11405	10	5541	10	2454	0.0819435	0.342123	not_significant	-0.371278	1.08649	2.8634	2.602	3.125	0.133	21.467	0	-0.0513	-0.058	-0.045	0.003	-15.786	0	TRUE
Curvature of spine	musculoskeletal	-1.3247	-4.106	1.457	1.419	-0.934	0.265883	0.0164735	4.29306	10	5541	10	2454	0.35054	0.693989	not_significant	-0.57531	0.455263	2.864	2.602	3.125	0.133	21.465	0	-0.0513	-0.058	-0.045	0.003	-15.799	0	TRUE
Cushing's syndrome	endocrine/metabolic	0.3812	-1.826	2.588	1.126	0.339	1.46404	0.161057	13.3031	10	5541	10	2454	0.734942	0.909748	not_significant	0.165553	0.133747	2.8604	2.599	3.122	0.133	21.444	0	-0.0512	-0.058	-0.045	0.003	-15.78	0	TRUE
Cutaneous lupus erythematosus	dermatologic	-0.914	-3.709	1.881	1.426	-0.641	0.400917	0.024502	6.56006	10	5541	10	2454	0.521564	0.840258	not_significant	-0.396945	0.282693	2.8617	2.6	3.123	0.133	21.455	0	-0.0513	-0.058	-0.045	0.003	-15.788	0	TRUE
Cyst of bone	musculoskeletal	-0.4657	-1.927	0.996	0.746	-0.625	0.627696	0.145584	2.70743	10	5541	10	2454	0.532219	0.843627	not_significant	-0.202251	0.27391	2.8626	2.601	3.124	0.133	21.458	0	-0.0513	-0.058	-0.045	0.003	-15.791	0	TRUE
Cyst of kidney, acquired	genitourinary	0.07	-0.821	0.961	0.455	0.154	1.07251	0.439991	2.61431	13	5538	10	2454	0.877582	0.958318	not_significant	0.0304006	0.0567122	2.8623	2.6	3.124	0.134	21.425	0	-0.0513	-0.058	-0.045	0.003	-15.758	0	TRUE
Cyst of the salivary gland	digestive	0.0497	-2.219	2.318	1.157	0.043	1.05096	0.108718	10.1553	10	5541	10	2454	0.965752	0.991243	not_significant	0.0215844	0.0151344	2.861	2.6	3.122	0.133	21.448	0	-0.0512	-0.058	-0.045	0.003	-15.783	0	TRUE
Cystic kidney disease	congenital anomalies	0.4226	-0.579	1.424	0.511	0.827	1.52592	0.560459	4.1537	15	5536	10	2454	0.408219	0.75147	not_significant	0.183533	0.389106	2.8646	2.603	3.126	0.133	21.466	0	-0.0514	-0.058	-0.045	0.003	-15.806	0	TRUE
Cystitis	genitourinary	0.7082	-0.412	1.829	0.572	1.239	2.03033	0.662324	6.22766	11	5540	10	2454	0.215424	0.558466	not_significant	0.307567	0.666706	2.8738	2.612	3.136	0.134	21.478	0	-0.0516	-0.058	-0.045	0.003	-15.832	0	TRUE
Cystoid macular degeneration of retina	sense organs	-0.0658	-1.497	1.366	0.73	-0.09	0.936318	0.223801	3.91964	10	5541	10	2454	0.928249	0.978277	not_significant	-0.0285766	0.0323356	2.8611	2.6	3.123	0.133	21.452	0	-0.0512	-0.058	-0.045	0.003	-15.785	0	TRUE
Cysts of oral soft tissues	digestive	-0.4528	-3.229	2.323	1.416	-0.32	0.635845	0.0395971	10.2062	10	5541	10	2454	0.749235	0.91749	not_significant	-0.196649	0.125382	2.8606	2.599	3.122	0.133	21.447	0	-0.0512	-0.058	-0.045	0.003	-15.779	0	TRUE
Cysts of the jaws	digestive	-0.9397	-3.714	1.835	1.416	-0.664	0.390745	0.0243798	6.26513	10	5541	10	2454	0.506791	0.829862	not_significant	-0.408107	0.295171	2.8619	2.6	3.123	0.133	21.456	0	-0.0513	-0.058	-0.045	0.003	-15.788	0	TRUE
Debility unspecified		0.0534	-2.25	2.357	1.175	0.045	1.05485	0.105399	10.5592	10	5541	10	2454	0.963748	0.991243	not_significant	0.0231913	0.0160365	2.861	2.6	3.122	0.133	21.449	0	-0.0512	-0.058	-0.045	0.003	-15.784	0	TRUE
Decreased libido	mental disorders	0.692	0.252	1.132	0.224	3.083	1.99771	1.2866	3.10185	105	5446	26	2438	0.00204842	0.023352	mi_significant	0.300532	2.68858	2.8647	2.603	3.126	0.134	21.453	0	-0.0516	-0.058	-0.045	0.003	-15.86	0	TRUE
Decreased white blood cell count	hematopoietic	0.0348	-0.538	0.607	0.292	0.119	1.03541	0.583915	1.83492	41	5510	18	2446	0.90519	0.970671	not_significant	0.0151134	0.0432602	2.861	2.6	3.122	0.133	21.45	0	-0.0513	-0.058	-0.045	0.003	-15.785	0	TRUE
Decubitus ulcer	dermatologic	-0.0278	-1.689	1.633	0.848	-0.033	0.972583	0.184704	5.11921	10	5541	10	2454	0.973823	0.993183	not_significant	-0.0120734	0.0115199	2.8612	2.6	3.123	0.133	21.45	0	-0.0512	-0.058	-0.045	0.003	-15.785	0	TRUE
Deep vein thrombosis [DVT]	circulatory system	0.1142	-0.541	0.769	0.334	0.342	1.12098	0.582166	2.15761	31	5520	14	2450	0.732436	0.908524	not_significant	0.0495964	0.13523	2.8615	2.6	3.123	0.133	21.455	0	-0.0513	-0.058	-0.045	0.003	-15.79	0	TRUE
Defibrination syndrome	hematopoietic	0.0514	-1.585	1.688	0.835	0.062	1.05274	0.204948	5.40865	10	5541	10	2454	0.950953	0.985533	not_significant	0.0223227	0.0218411	2.8609	2.599	3.122	0.133	21.446	0	-0.0512	-0.058	-0.045	0.003	-15.782	0	TRUE
Deficiency anemias	hematopoietic	0.839	-0.331	2.009	0.597	1.405	2.31405	0.718205	7.45586	12	5539	10	2454	0.159982	0.477551	not_significant	0.364373	0.79593	2.872	2.61	3.134	0.134	21.486	0	-0.0516	-0.058	-0.045	0.003	-15.838	0	TRUE
Deficiency of humoral immunity	endocrine/metabolic	0.2046	-0.963	1.372	0.596	0.343	1.22703	0.381746	3.94323	11	5540	10	2454	0.731306	0.908296	not_significant	0.0888567	0.135901	2.8609	2.599	3.122	0.133	21.449	0	-0.0513	-0.058	-0.045	0.003	-15.785	0	TRUE
Degeneration of intervertebral disc	musculoskeletal	-0.5795	-0.942	-0.217	0.185	-3.136	0.560178	0.389847	0.80493	66	5485	60	2404	0.00171281	0.0202994	con_significant	-0.251674	2.76629	2.8509	2.589	3.113	0.133	21.356	0	-0.0507	-0.057	-0.044	0.003	-15.601	0	TRUE
Degenerative and vascular disorders of ear	sense organs	-0.3252	-2.137	1.487	0.925	-0.352	0.722383	0.118008	4.4238	10	5541	10	2454	0.724998	0.908296	not_significant	-0.141233	0.139663	2.8611	2.6	3.123	0.133	21.452	0	-0.0512	-0.058	-0.045	0.003	-15.783	0	TRUE
Degenerative disease of the spinal cord	neurological	-0.3089	-1.328	0.71	0.52	-0.594	0.734254	0.265007	2.03399	10	5541	10	2454	0.552453	0.849983	not_significant	-0.134154	0.257704	2.8595	2.598	3.121	0.133	21.435	0	-0.0512	-0.058	-0.045	0.003	-15.76	0	TRUE
Delirium due to conditions classified elsewhere	mental disorders	0.6603	-0.88	2.2	0.786	0.84	1.93537	0.414783	9.02501	10	5541	10	2454	0.400654	0.747013	not_significant	0.286765	0.397231	2.859	2.598	3.12	0.133	21.431	0	-0.0512	-0.058	-0.045	0.003	-15.773	0	TRUE
Dental caries	digestive	-0.9715	-2.371	0.428	0.714	-1.361	0.378515	0.0933873	1.53419	10	5541	10	2454	0.173561	0.500609	not_significant	-0.421917	0.760547	2.8646	2.603	3.126	0.133	21.47	0	-0.0513	-0.058	-0.045	0.003	-15.8	0	TRUE
Dentofacial anomalies, including malocclusion	digestive	-1.4762	-2.685	-0.268	0.617	-2.394	0.228504	0.0682212	0.764908	10	5541	10	2454	0.0166565	0.120107	not_significant	-0.641106	1.77842	2.863	2.601	3.125	0.133	21.458	0	-0.0512	-0.058	-0.045	0.003	-15.775	0	TRUE
Depression		-0.1948	-0.526	0.136	0.169	-1.153	0.822999	0.590964	1.14568	97	5454	62	2402	0.249043	0.590307	not_significant	-0.0846006	0.603725	2.8552	2.594	3.117	0.133	21.395	0	-0.051	-0.057	-0.045	0.003	-15.676	0	TRUE
Dermatitis due to solar radiation	dermatologic	-0.6648	-1.744	0.414	0.551	-1.207	0.514376	0.17482	1.51286	10	5541	10	2454	0.227259	0.571489	not_significant	-0.288719	0.643479	2.8595	2.598	3.121	0.133	21.44	0	-0.0512	-0.058	-0.045	0.003	-15.762	0	TRUE
Dermatomycoses	infectious diseases	-0.5241	-1.008	-0.04	0.247	-2.123	0.592088	0.364948	0.960789	40	5511	30	2434	0.0337153	0.193097	not_significant	-0.227614	1.47217	2.8658	2.604	3.127	0.133	21.477	0	-0.0512	-0.058	-0.045	0.003	-15.779	0	TRUE
Dermatophytosis	infectious diseases	-0.4787	-1.1	0.142	0.317	-1.51	0.619588	0.332871	1.15258	23	5528	19	2445	0.130917	0.430287	not_significant	-0.207897	0.883003	2.8583	2.597	3.12	0.133	21.43	0	-0.0511	-0.057	-0.045	0.003	-15.738	0	TRUE
Dermatophytosis of nail	infectious diseases	-0.7966	-1.13	-0.463	0.17	-4.682	0.450859	0.323033	0.629393	69	5482	80	2384	2.84247e-06	9.19576e-05	con_significant	-0.345959	5.5463	2.8371	2.575	3.099	0.134	21.223	0	-0.0502	-0.057	-0.044	0.003	-15.415	0	TRUE
Dermatophytosis of the body	infectious diseases	-0.0203	-0.46	0.419	0.224	-0.091	0.979905	0.631284	1.52044	64	5487	31	2433	0.927803	0.978277	not_significant	-0.00881618	0.0325441	2.8611	2.6	3.123	0.133	21.452	0	-0.0512	-0.058	-0.045	0.003	-15.781	0	TRUE
Develomental delays and disorders	mental disorders	0.5493	-1.684	2.783	1.14	0.482	1.73204	0.18563	16.1675	10	5541	10	2454	0.629791	0.884687	not_significant	0.238558	0.200804	2.8608	2.599	3.122	0.133	21.448	0	-0.0512	-0.058	-0.045	0.003	-15.784	0	TRUE
Diabetes insipidus	endocrine/metabolic	0.7802	-0.756	2.316	0.784	0.995	2.18191	0.469541	10.1351	10	5541	10	2454	0.319509	0.673332	not_significant	0.338837	0.495517	2.86	2.599	3.121	0.133	21.441	0	-0.0512	-0.058	-0.045	0.003	-15.782	0	TRUE
Diabetes mellitus	endocrine/metabolic	0.8602	-0.5	2.22	0.694	1.239	2.36363	0.606531	9.20733	10	5541	10	2454	0.215202	0.558466	not_significant	0.37358	0.667153	2.8697	2.608	3.132	0.134	21.479	0	-0.0515	-0.058	-0.045	0.003	-15.827	0	TRUE
Diabetes type 1 with peripheral circulatory disorders	endocrine/metabolic	-0.6321	-3.41	2.146	1.417	-0.446	0.531475	0.0330412	8.55059	10	5541	10	2454	0.655617	0.894826	not_significant	-0.274518	0.18335	2.8609	2.599	3.122	0.133	21.45	0	-0.0512	-0.058	-0.045	0.003	-15.782	0	TRUE
Diabetes type 2 with peripheral circulatory disorders	endocrine/metabolic	1.2139	-1.117	3.545	1.189	1.021	3.36659	0.32726	34.6397	10	5541	10	2454	0.30737	0.660266	not_significant	0.52719	0.512339	2.8657	2.604	3.127	0.133	21.477	0	-0.0514	-0.058	-0.045	0.003	-15.816	0	TRUE
Diabetic retinopathy	endocrine/metabolic	0.5007	-0.573	1.575	0.548	0.914	1.64988	0.563831	4.83074	12	5539	10	2454	0.360758	0.703301	not_significant	0.217451	0.442785	2.8663	2.605	3.128	0.134	21.469	0	-0.0514	-0.058	-0.045	0.003	-15.811	0	TRUE
Diaphragmatic hernia	digestive	-0.5347	-1.089	0.019	0.283	-1.892	0.585845	0.336553	1.01918	27	5524	28	2436	0.0585158	0.280174	not_significant	-0.232217	1.23273	2.8471	2.585	3.109	0.134	21.313	0	-0.0508	-0.057	-0.044	0.003	-15.604	0	TRUE
Diarrhea	digestive	-0.2137	-0.475	0.048	0.133	-1.602	0.807591	0.621885	1.04917	169	5382	96	2368	0.109098	0.397339	not_significant	-0.0928087	0.962182	2.8638	2.602	3.125	0.133	21.47	0	-0.0511	-0.057	-0.045	0.003	-15.747	0	TRUE
Difficulty in walking	musculoskeletal	-0.7329	-2.397	0.931	0.849	-0.863	0.480513	0.0909905	2.53704	10	5541	10	2454	0.388017	0.734899	not_significant	-0.318294	0.41115	2.8611	2.6	3.123	0.133	21.448	0	-0.0512	-0.058	-0.045	0.003	-15.777	0	TRUE
Diplopia and disorders of binocular vision	sense organs	-0.9573	-1.824	-0.091	0.442	-2.165	0.383928	0.161379	0.913018	10	5541	12	2452	0.0304028	0.177523	not_significant	-0.41575	1.51709	2.8625	2.601	3.124	0.133	21.448	0	-0.0512	-0.058	-0.045	0.003	-15.763	0	TRUE
Disease of capillaries	circulatory system	0.5363	-0.796	1.868	0.68	0.789	1.70967	0.45113	6.47533	10	5541	10	2454	0.430041	0.775604	not_significant	0.232912	0.366491	2.8629	2.601	3.124	0.133	21.46	0	-0.0513	-0.058	-0.045	0.003	-15.799	0	TRUE
Disease of tricuspid valve	circulatory system	-1.3086	-2.438	-0.179	0.576	-2.27	0.270198	0.0873353	0.836106	10	5541	10	2454	0.0232137	0.152273	not_significant	-0.568318	1.63426	2.8644	2.603	3.126	0.133	21.47	0	-0.0513	-0.058	-0.045	0.003	-15.789	0	TRUE
Diseases and other conditions of the tongue	digestive	-0.0877	-1.172	0.996	0.553	-0.159	0.916036	0.309747	2.70743	10	5541	10	2454	0.874055	0.958318	not_significant	-0.0380876	0.058461	2.8612	2.6	3.123	0.133	21.452	0	-0.0512	-0.058	-0.045	0.003	-15.785	0	TRUE
Diseases of esophagus	digestive	0.3197	-0.854	1.493	0.599	0.534	1.37671	0.425709	4.45043	11	5540	10	2454	0.593431	0.866265	not_significant	0.138844	0.22663	2.8615	2.6	3.123	0.133	21.453	0	-0.0513	-0.058	-0.045	0.003	-15.79	0	TRUE
Diseases of hair and hair follicles	dermatologic	-0.461	-0.867	-0.056	0.207	-2.229	0.630653	0.42021	0.945539	60	5491	42	2422	0.0258454	0.161465	not_significant	-0.20021	1.58762	2.8674	2.606	3.129	0.133	21.483	0	-0.0512	-0.058	-0.045	0.003	-15.778	0	TRUE
Diseases of hard tissues of teeth	digestive	-0.7346	-3.513	2.043	1.417	-0.518	0.479697	0.0298074	7.71372	10	5541	10	2454	0.604251	0.873333	not_significant	-0.319033	0.218782	2.8611	2.6	3.123	0.133	21.452	0	-0.0512	-0.058	-0.045	0.003	-15.784	0	TRUE
Diseases of lips	digestive	-0.2343	-0.983	0.515	0.382	-0.613	0.791124	0.374187	1.67364	21	5530	11	2453	0.539851	0.846755	not_significant	-0.101755	0.267726	2.8628	2.601	3.124	0.133	21.459	0	-0.0513	-0.058	-0.045	0.003	-15.79	0	TRUE
Diseases of nail, NOS	dermatologic	-0.5122	-1.012	-0.012	0.255	-2.008	0.599176	0.363491	0.988072	36	5515	30	2434	0.0446741	0.232982	not_significant	-0.222446	1.34994	2.8579	2.596	3.119	0.133	21.421	0	-0.0511	-0.057	-0.045	0.003	-15.715	0	TRUE
Diseases of pancreas	digestive	1.1906	0.219	2.163	0.496	2.401	3.28905	1.24483	8.69719	31	5520	10	2454	0.0163546	0.119368	not_significant	0.517071	1.78636	2.8668	2.605	3.129	0.134	21.472	0	-0.0515	-0.058	-0.045	0.003	-15.84	0	TRUE
Diseases of pulp and periapical tissues	digestive	-0.8371	-3.61	1.935	1.415	-0.592	0.432964	0.0270518	6.92404	10	5541	10	2454	0.55399	0.851252	not_significant	-0.363548	0.256498	2.8615	2.6	3.123	0.133	21.454	0	-0.0513	-0.058	-0.045	0.003	-15.786	0	TRUE
Diseases of spleen	hematopoietic	-0.3573	-1.81	1.096	0.741	-0.482	0.699563	0.163654	2.99217	10	5541	10	2454	0.629837	0.884687	not_significant	-0.155173	0.200772	2.8618	2.6	3.123	0.133	21.455	0	-0.0513	-0.058	-0.045	0.003	-15.787	0	TRUE
Diseases of the jaws	digestive	-0.0512	-0.954	0.852	0.461	-0.111	0.950089	0.385197	2.34433	16	5535	10	2454	0.911595	0.972409	not_significant	-0.0222359	0.0401979	2.8614	2.6	3.123	0.133	21.45	0	-0.0512	-0.058	-0.045	0.003	-15.786	0	TRUE
Diseases of the larynx and vocal cords	respiratory	0.2671	-0.598	1.132	0.441	0.605	1.30617	0.54991	3.10185	19	5532	10	2454	0.545192	0.849983	not_significant	0.116	0.26345	2.8624	2.601	3.124	0.133	21.462	0	-0.0513	-0.058	-0.045	0.003	-15.799	0	TRUE
Diseases of the oral soft tissues, excluding lesions specific for gingiva and tongue	digestive	-0.0379	-0.611	0.535	0.292	-0.13	0.962809	0.542808	1.70745	38	5513	18	2446	0.896796	0.967085	not_significant	-0.0164598	0.0473063	2.8613	2.6	3.123	0.133	21.452	0	-0.0512	-0.058	-0.045	0.003	-15.784	0	TRUE
Diseases of white blood cells	hematopoietic	0.7826	-0.78	2.345	0.797	0.982	2.18715	0.458406	10.4333	10	5541	10	2454	0.326312	0.67643	not_significant	0.339879	0.486367	2.8627	2.601	3.124	0.133	21.459	0	-0.0513	-0.058	-0.045	0.003	-15.799	0	TRUE
Dislocation	injuries & poisonings	-0.6032	-0.97	-0.237	0.187	-3.226	0.547058	0.379083	0.788991	67	5484	55	2409	0.00125357	0.0157949	con_significant	-0.261966	2.90185	2.8679	2.606	3.13	0.133	21.489	0	-0.0512	-0.058	-0.045	0.003	-15.755	0	TRUE
Disorder of skin and subcutaneous tissue NOS	dermatologic	-0.5876	-0.86	-0.315	0.139	-4.222	0.555659	0.423162	0.729789	120	5431	106	2358	2.41625e-05	0.000578449	con_significant	-0.255191	4.61686	2.8481	2.587	3.11	0.133	21.337	0	-0.0505	-0.057	-0.044	0.003	-15.514	0	TRUE
Disorders involving the immune mechanism	endocrine/metabolic	0.0722	-0.678	0.823	0.383	0.189	1.07487	0.507631	2.27732	23	5528	11	2453	0.850381	0.954959	not_significant	0.0313561	0.0703866	2.8615	2.6	3.123	0.133	21.452	0	-0.0513	-0.058	-0.045	0.003	-15.785	0	TRUE
Disorders of acoustic nerve	sense organs	-0.7165	-1.75	0.317	0.527	-1.358	0.488459	0.173774	1.373	10	5541	10	2454	0.174363	0.501713	not_significant	-0.311172	0.758546	2.8578	2.596	3.119	0.133	21.425	0	-0.0511	-0.057	-0.045	0.003	-15.744	0	TRUE
Disorders of adrenal glands	endocrine/metabolic	0.2505	-1.141	1.642	0.71	0.353	1.28467	0.319499	5.16549	10	5541	10	2454	0.724251	0.908296	not_significant	0.108791	0.140111	2.8618	2.6	3.123	0.133	21.453	0	-0.0513	-0.058	-0.045	0.003	-15.788	0	TRUE
Disorders of bilirubin excretion	endocrine/metabolic	-0.5264	-1.178	0.125	0.332	-1.584	0.590728	0.307894	1.13315	22	5529	17	2447	0.11315	0.405121	not_significant	-0.228613	0.946346	2.8628	2.601	3.124	0.133	21.456	0	-0.0512	-0.058	-0.045	0.003	-15.771	0	TRUE
Disorders of calcium/phosphorus metabolism	endocrine/metabolic	-0.6072	-2.607	1.392	1.02	-0.595	0.544874	0.0737555	4.02289	10	5541	10	2454	0.551702	0.849983	not_significant	-0.263704	0.258295	2.8605	2.599	3.122	0.133	21.447	0	-0.0512	-0.058	-0.045	0.003	-15.777	0	TRUE
Disorders of conjunctiva	sense organs	-0.2369	-0.845	0.371	0.31	-0.763	0.78907	0.429557	1.44918	27	5524	19	2445	0.445349	0.783848	not_significant	-0.102884	0.351299	2.8579	2.596	3.119	0.133	21.419	0	-0.0511	-0.058	-0.045	0.003	-15.734	0	TRUE
Disorders of diaphragm	respiratory	0.3729	-0.803	1.549	0.6	0.621	1.45194	0.447983	4.70676	12	5539	10	2454	0.534375	0.843861	not_significant	0.161948	0.272154	2.8615	2.6	3.123	0.133	21.451	0	-0.0513	-0.058	-0.045	0.003	-15.789	0	TRUE
Disorders of esophageal motility	digestive	-0.5425	-1.645	0.56	0.562	-0.965	0.581293	0.193013	1.75067	10	5541	10	2454	0.334782	0.685016	not_significant	-0.235605	0.475238	2.8583	2.597	3.12	0.133	21.423	0	-0.0512	-0.058	-0.045	0.003	-15.746	0	TRUE
Disorders of external ear	sense organs	-1.2152	-2.261	-0.169	0.534	-2.277	0.296651	0.104246	0.844509	10	5541	10	2454	0.022808	0.152273	not_significant	-0.527755	1.64191	2.8638	2.602	3.125	0.133	21.463	0	-0.0512	-0.058	-0.045	0.003	-15.781	0	TRUE
Disorders of iron metabolism	hematopoietic	0.9961	-0.492	2.484	0.759	1.312	2.7077	0.611402	11.9891	15	5536	10	2454	0.189477	0.526605	not_significant	0.432601	0.722443	2.8558	2.594	3.117	0.133	21.401	0	-0.0512	-0.058	-0.045	0.003	-15.75	0	TRUE
Disorders of magnesium metabolism	endocrine/metabolic	0.018	-0.707	0.743	0.37	0.049	1.01816	0.493121	2.10223	27	5524	11	2453	0.961256	0.990384	not_significant	0.0078173	0.0171609	2.861	2.6	3.122	0.133	21.446	0	-0.0512	-0.058	-0.045	0.003	-15.784	0	TRUE
Disorders of optic nerve and visual pathways	sense organs	-0.6671	-1.794	0.46	0.575	-1.16	0.513195	0.166294	1.58407	10	5541	10	2454	0.246186	0.587763	not_significant	-0.289718	0.608737	2.8628	2.601	3.124	0.133	21.453	0	-0.0513	-0.058	-0.045	0.003	-15.782	0	TRUE
Disorders of other cranial nerves	neurological	-0.1456	-2.557	2.265	1.23	-0.118	0.864503	0.077537	9.63112	10	5541	10	2454	0.905797	0.970671	not_significant	-0.0632333	0.042969	2.8612	2.6	3.123	0.133	21.452	0	-0.0512	-0.058	-0.045	0.003	-15.785	0	TRUE
Disorders of penis	genitourinary	0.4457	0.01	0.881	0.222	2.005	1.56158	1.01005	2.41331	91	5460	28	2436	0.0449614	0.232982	not_significant	0.193565	1.34716	2.8621	2.6	3.124	0.134	21.439	0	-0.0514	-0.058	-0.045	0.003	-15.818	0	TRUE
Disorders of phosphorus metabolism	endocrine/metabolic	-0.1435	-0.991	0.704	0.432	-0.332	0.866321	0.371205	2.02182	19	5532	10	2454	0.739953	0.913117	not_significant	-0.0623213	0.130796	2.8626	2.601	3.124	0.133	21.451	0	-0.0513	-0.058	-0.045	0.003	-15.789	0	TRUE
Disorders of refraction and accommodation; blindness and low vision	sense organs	0.6901	-0.574	1.954	0.645	1.07	1.99391	0.563268	7.05686	13	5538	10	2454	0.284726	0.632548	not_significant	0.299707	0.545573	2.8604	2.599	3.122	0.133	21.446	0	-0.0513	-0.058	-0.045	0.003	-15.788	0	TRUE
Disorders of sacrum	musculoskeletal	0.3775	-0.93	1.685	0.667	0.566	1.45863	0.394554	5.39245	10	5541	10	2454	0.571417	0.858101	not_significant	0.163946	0.243047	2.8605	2.599	3.122	0.133	21.446	0	-0.0512	-0.058	-0.045	0.003	-15.784	0	TRUE
Disorders of sweat glands	dermatologic	-0.8002	-2.636	1.035	0.937	-0.854	0.449239	0.0716473	2.81511	10	5541	10	2454	0.39284	0.738194	not_significant	-0.347522	0.405784	2.8585	2.597	3.12	0.133	21.427	0	-0.0512	-0.058	-0.045	0.003	-15.754	0	TRUE
Disorders of the autonomic nervous system	neurological	-0.607	-1.822	0.608	0.62	-0.979	0.544983	0.161702	1.83675	10	5541	10	2454	0.327391	0.67643	not_significant	-0.263617	0.484933	2.8617	2.6	3.123	0.133	21.455	0	-0.0512	-0.058	-0.045	0.003	-15.782	0	TRUE
Disorders of the pituitary gland and its hypothalamic control	endocrine/metabolic	2.6907	0.63	4.752	1.052	2.559	14.742	1.87761	115.816	24	5527	10	2454	0.0105003	0.0849247	not_significant	1.16856	1.9788	2.8716	2.61	3.133	0.134	21.496	0	-0.0516	-0.058	-0.045	0.003	-15.87	0	TRUE
Disorders of vitreous body	sense organs	0.3296	-0.219	0.878	0.28	1.177	1.39041	0.803322	2.40608	46	5505	20	2444	0.239282	0.584532	not_significant	0.143143	0.62109	2.8697	2.608	3.132	0.134	21.478	0	-0.0515	-0.058	-0.045	0.003	-15.826	0	TRUE
Disorders resulting from impaired renal function	genitourinary	-0.7858	-3.609	2.038	1.441	-0.545	0.455755	0.0270789	7.67524	10	5541	10	2454	0.585413	0.863914	not_significant	-0.341269	0.232537	2.8612	2.6	3.123	0.133	21.453	0	-0.0512	-0.058	-0.045	0.003	-15.785	0	TRUE
Displacement of intervertebral disc	musculoskeletal	-0.6583	-1.004	-0.312	0.177	-3.729	0.517731	0.366411	0.731982	71	5480	64	2400	0.000192505	0.00360044	con_significant	-0.285896	3.71556	2.8641	2.602	3.126	0.134	21.45	0	-0.051	-0.057	-0.045	0.003	-15.696	0	TRUE
Dissociative disorder	mental disorders	-1.5809	-3.994	0.833	1.231	-1.284	0.20579	0.0184259	2.30021	10	5541	10	2454	0.199232	0.533913	not_significant	-0.686576	0.700641	2.8626	2.601	3.124	0.133	21.46	0	-0.0513	-0.058	-0.045	0.003	-15.79	0	TRUE
Disturbance of salivary secretion	digestive	-2.2177	-3.814	-0.621	0.815	-2.723	0.108859	0.0220598	0.537407	10	5541	10	2454	0.00647688	0.0600814	not_significant	-0.963135	2.18863	2.8685	2.607	3.13	0.133	21.494	0	-0.0514	-0.058	-0.045	0.003	-15.814	0	TRUE
Disturbance of skin sensation	dermatologic	-0.5712	-0.831	-0.312	0.132	-4.313	0.564847	0.435613	0.731982	133	5418	116	2348	1.61037e-05	0.000401585	con_significant	-0.248069	4.79308	2.8469	2.585	3.109	0.133	21.325	0	-0.0504	-0.057	-0.044	0.003	-15.49	0	TRUE
Disturbances of sensation of smell and taste	neurological	-1.0737	-1.947	-0.201	0.446	-2.41	0.341742	0.142702	0.817912	10	5541	13	2451	0.0159506	0.118378	not_significant	-0.466302	1.79722	2.8592	2.598	3.121	0.133	21.429	0	-0.0511	-0.057	-0.045	0.003	-15.738	0	TRUE
Disturbances of sulphur-bearing amino-acid metabolism	endocrine/metabolic	-0.6406	-2.653	1.372	1.027	-0.624	0.526976	0.0704396	3.94323	10	5541	10	2454	0.532817	0.843627	not_significant	-0.278209	0.273422	2.8606	2.599	3.122	0.133	21.447	0	-0.0512	-0.058	-0.045	0.003	-15.778	0	TRUE
Diverticulitis	digestive	-0.6843	-1.432	0.063	0.381	-1.794	0.504443	0.238831	1.06503	14	5537	15	2449	0.0727884	0.319149	not_significant	-0.297188	1.13794	2.8564	2.595	3.118	0.133	21.409	0	-0.0511	-0.057	-0.045	0.003	-15.718	0	TRUE
Diverticulosis	digestive	-0.2513	-0.688	0.186	0.223	-1.127	0.777789	0.50258	1.20442	44	5507	45	2419	0.259608	0.604574	not_significant	-0.109138	0.585681	2.839	2.575	3.103	0.135	21.067	0	-0.0506	-0.057	-0.044	0.003	-15.372	0	TRUE
Dizziness and giddiness (Light-headedness and vertigo)	sense organs	-0.329	-0.617	-0.041	0.147	-2.237	0.719643	0.539561	0.959829	125	5426	82	2382	0.0252851	0.159296	not_significant	-0.142883	1.59713	2.8609	2.599	3.122	0.133	21.454	0	-0.051	-0.057	-0.045	0.003	-15.71	0	TRUE
Drusen (degenerative) of retina	sense organs	0.7219	-1.598	3.042	1.184	0.61	2.05834	0.202301	20.9471	10	5541	10	2454	0.541942	0.846872	not_significant	0.313517	0.266047	2.8629	2.601	3.124	0.133	21.458	0	-0.0513	-0.058	-0.045	0.003	-15.795	0	TRUE
Dry eyes	sense organs	0.1275	-0.555	0.81	0.348	0.366	1.13598	0.574072	2.24791	28	5523	13	2451	0.714229	0.908296	not_significant	0.0553725	0.146163	2.8619	2.6	3.123	0.133	21.456	0	-0.0513	-0.058	-0.045	0.003	-15.79	0	TRUE
Duodenal ulcer	digestive	-0.6852	-2.115	0.744	0.729	-0.94	0.503989	0.120633	2.10434	10	5541	10	2454	0.34746	0.693183	not_significant	-0.297579	0.459095	2.8604	2.599	3.122	0.133	21.447	0	-0.0512	-0.058	-0.045	0.003	-15.773	0	TRUE
Duodenitis	digestive	-0.4833	-1.387	0.42	0.461	-1.049	0.616745	0.249824	1.52196	11	5540	10	2454	0.294336	0.644094	not_significant	-0.209895	0.531157	2.86	2.599	3.121	0.133	21.443	0	-0.0512	-0.058	-0.045	0.003	-15.764	0	TRUE
Dyshidrosis	dermatologic	-0.496	-1.255	0.263	0.387	-1.28	0.608962	0.285076	1.30083	16	5535	12	2452	0.200462	0.535084	not_significant	-0.21541	0.697967	2.8623	2.601	3.124	0.133	21.459	0	-0.0512	-0.058	-0.045	0.003	-15.779	0	TRUE
Dysmetabolic syndrome X	endocrine/metabolic	0.3603	-0.336	1.057	0.355	1.014	1.43376	0.714623	2.87772	29	5522	12	2452	0.310539	0.663944	not_significant	0.156476	0.507883	2.8665	2.605	3.128	0.134	21.47	0	-0.0514	-0.058	-0.045	0.003	-15.814	0	TRUE
Dyspareunia	genitourinary	-0.4414	-2.845	1.962	1.226	-0.36	0.643135	0.0581343	7.11354	10	5541	10	2454	0.718938	0.908296	not_significant	-0.191698	0.143308	2.862	2.601	3.124	0.133	21.454	0	-0.0513	-0.058	-0.045	0.003	-15.788	0	TRUE
Dyspepsia and other specified disorders of function of stomach	digestive	0.5633	-0.046	1.172	0.311	1.813	1.75646	0.955042	3.22844	49	5502	14	2450	0.0698881	0.31477	not_significant	0.244638	1.1556	2.8639	2.602	3.126	0.133	21.459	0	-0.0514	-0.058	-0.045	0.003	-15.822	0	TRUE
Dysphagia	digestive	-0.2354	-0.672	0.201	0.223	-1.058	0.790255	0.510686	1.22262	58	5493	35	2429	0.29014	0.638414	not_significant	-0.102233	0.537393	2.861	2.6	3.123	0.133	21.447	0	-0.0512	-0.058	-0.045	0.003	-15.756	0	TRUE
Dysthymic disorder	mental disorders	-0.7481	-1.377	-0.119	0.321	-2.33	0.473265	0.252334	0.887808	21	5530	20	2444	0.0197948	0.137758	not_significant	-0.324896	1.70345	2.8637	2.602	3.125	0.133	21.465	0	-0.0512	-0.058	-0.045	0.003	-15.77	0	TRUE
Dysuria	genitourinary	0.4327	0.051	0.815	0.195	2.219	1.54141	1.05232	2.25918	115	5436	38	2426	0.0264662	0.164146	not_significant	0.187919	1.57731	2.8675	2.606	3.129	0.134	21.478	0	-0.0516	-0.058	-0.045	0.003	-15.862	0	TRUE
E. coli	infectious diseases	1.4857	-0.629	3.6	1.079	1.377	4.41806	0.533125	36.5982	10	5541	10	2454	0.168464	0.492317	not_significant	0.645231	0.773493	2.8641	2.602	3.126	0.133	21.459	0	-0.0514	-0.058	-0.045	0.003	-15.804	0	TRUE
Eating disorder	mental disorders	-0.0229	-2.333	2.288	1.179	-0.019	0.97736	0.0970043	9.85521	10	5541	10	2454	0.984509	0.997615	not_significant	-0.00994534	0.00678017	2.8612	2.6	3.123	0.133	21.449	0	-0.0512	-0.058	-0.045	0.003	-15.784	0	TRUE
Ectropion or entropion	sense organs	-0.5296	-3.353	2.294	1.441	-0.368	0.58884	0.0349793	9.91452	10	5541	10	2454	0.713161	0.908296	not_significant	-0.230002	0.146813	2.8607	2.599	3.122	0.133	21.448	0	-0.0512	-0.058	-0.045	0.003	-15.78	0	TRUE
Edema	symptoms	0.106	-0.288	0.5	0.201	0.528	1.11182	0.749762	1.64872	80	5471	43	2421	0.597787	0.870495	not_significant	0.0460352	0.223454	2.8662	2.604	3.128	0.134	21.434	0	-0.0514	-0.058	-0.045	0.003	-15.763	0	TRUE
Effects of heat, cold and air pressure		-0.2444	-1.266	0.777	0.521	-0.469	0.783174	0.281957	2.17494	10	5541	10	2454	0.639101	0.885289	not_significant	-0.106142	0.194431	2.8613	2.6	3.123	0.133	21.453	0	-0.0512	-0.058	-0.045	0.003	-15.782	0	TRUE
Effects of other external causes		-0.5483	-1.261	0.165	0.364	-1.507	0.577931	0.283371	1.17939	17	5534	15	2449	0.131711	0.430761	not_significant	-0.238124	0.880377	2.8588	2.597	3.12	0.133	21.432	0	-0.0511	-0.057	-0.045	0.003	-15.744	0	TRUE
Effects radiation NOS	injuries & poisonings	-0.3408	-2.257	1.575	0.978	-0.349	0.711201	0.104664	4.83074	10	5541	10	2454	0.727359	0.908296	not_significant	-0.148008	0.138251	2.8611	2.6	3.123	0.133	21.451	0	-0.0512	-0.058	-0.045	0.003	-15.783	0	TRUE
Electrolyte imbalance	endocrine/metabolic	0.7587	-0.072	1.59	0.424	1.789	2.1355	0.930531	4.90375	24	5527	10	2454	0.073552	0.32132	not_significant	0.329499	1.13341	2.8774	2.615	3.14	0.134	21.504	0	-0.0517	-0.058	-0.045	0.003	-15.866	0	TRUE
Elevated C-reactive protein (CRP)	symptoms	0.1009	-1.281	1.483	0.705	0.143	1.10617	0.277759	4.40614	10	5541	10	2454	0.886207	0.96028	not_significant	0.0438203	0.0524649	2.8611	2.6	3.123	0.133	21.452	0	-0.0512	-0.058	-0.045	0.003	-15.786	0	TRUE
Elevated prostate specific antigen [PSA]	genitourinary	1.2313	0.656	1.807	0.294	4.192	3.42568	1.92707	6.09214	50	5501	18	2446	2.76318e-05	0.000648535	mi_significant	0.534747	4.55859	2.9874	2.719	3.256	0.137	21.809	0	-0.0546	-0.061	-0.048	0.003	-16.322	0	TRUE
Elevated sedimentation rate	symptoms	-0.1454	-1.873	1.583	0.882	-0.165	0.864676	0.153662	4.86954	10	5541	10	2454	0.868999	0.958318	not_significant	-0.0631464	0.0609806	2.8612	2.6	3.123	0.133	21.453	0	-0.0512	-0.058	-0.045	0.003	-15.786	0	TRUE
Elevated white blood cell count	hematopoietic	-0.0079	-0.518	0.503	0.26	-0.03	0.992131	0.595711	1.65367	52	5499	23	2441	0.975893	0.99332	not_significant	-0.00343093	0.0105977	2.8612	2.6	3.123	0.133	21.448	0	-0.0512	-0.058	-0.045	0.003	-15.785	0	TRUE
Emphysema	respiratory	-1.2478	-3.1	0.604	0.945	-1.321	0.287136	0.0450492	1.82942	10	5541	10	2454	0.186659	0.523256	not_significant	-0.541913	0.728952	2.8618	2.6	3.123	0.133	21.458	0	-0.0512	-0.058	-0.045	0.003	-15.785	0	TRUE
Empyema and pneumothorax	respiratory	-0.8529	-1.622	-0.083	0.393	-2.173	0.426177	0.197503	0.920351	14	5537	14	2450	0.0298087	0.174907	not_significant	-0.37041	1.52566	2.8654	2.604	3.127	0.133	21.47	0	-0.0513	-0.058	-0.045	0.003	-15.785	0	TRUE
Encephalitis, non-infectious	neurological	0.3077	-1.337	1.952	0.839	0.367	1.36029	0.262632	7.04276	10	5541	10	2454	0.713766	0.908296	not_significant	0.133632	0.146444	2.8615	2.6	3.123	0.133	21.454	0	-0.0513	-0.058	-0.045	0.003	-15.789	0	TRUE
Encephalopathy, not elsewhere classified	neurological	-0.3521	-1.827	1.122	0.752	-0.468	0.70321	0.160896	3.07099	10	5541	10	2454	0.639745	0.885289	not_significant	-0.152915	0.193993	2.8616	2.6	3.123	0.133	21.456	0	-0.0512	-0.058	-0.045	0.003	-15.787	0	TRUE
End stage renal disease	genitourinary	0.6657	-0.256	1.588	0.47	1.415	1.94585	0.774142	4.89395	24	5527	10	2454	0.157037	0.473694	not_significant	0.28911	0.803999	2.8623	2.601	3.124	0.133	21.447	0	-0.0513	-0.058	-0.045	0.003	-15.798	0	TRUE
Endocarditis	circulatory system	0.1865	-0.961	1.334	0.585	0.319	1.20502	0.38251	3.7962	10	5541	10	2454	0.749961	0.91749	not_significant	0.0809959	0.124961	2.8626	2.601	3.124	0.133	21.449	0	-0.0513	-0.058	-0.045	0.003	-15.784	0	TRUE
Enthesopathy	musculoskeletal	-0.6232	-0.886	-0.361	0.134	-4.651	0.536226	0.412302	0.696979	127	5424	114	2350	3.308e-06	0.00010153	con_significant	-0.270652	5.48043	2.8527	2.591	3.114	0.133	21.37	0	-0.0505	-0.057	-0.044	0.003	-15.535	0	TRUE
Eosinophilia	hematopoietic	1.4382	-0.615	3.491	1.047	1.373	4.21311	0.540641	32.8188	11	5540	10	2454	0.169736	0.492317	not_significant	0.624602	0.770226	2.8569	2.595	3.118	0.133	21.417	0	-0.0512	-0.058	-0.045	0.003	-15.762	0	TRUE
Eosinophilic esophagitis	digestive	-0.4683	-1.242	0.305	0.395	-1.186	0.626066	0.288806	1.35663	15	5536	12	2452	0.235473	0.582514	not_significant	-0.20338	0.628058	2.8599	2.599	3.121	0.133	21.443	0	-0.0512	-0.058	-0.045	0.003	-15.761	0	TRUE
Epilepsy	neurological	-0.3292	-2.059	1.4	0.882	-0.373	0.719499	0.127581	4.0552	10	5541	10	2454	0.709041	0.908296	not_significant	-0.14297	0.149328	2.862	2.601	3.123	0.133	21.455	0	-0.0513	-0.058	-0.045	0.003	-15.789	0	TRUE
Epilepsy, recurrent seizures, convulsions	neurological	0.0874	-0.699	0.873	0.401	0.218	1.09133	0.497082	2.39408	20	5531	10	2454	0.827558	0.953093	not_significant	0.0379573	0.0822017	2.8616	2.6	3.123	0.133	21.453	0	-0.0513	-0.058	-0.045	0.003	-15.786	0	TRUE
Epistaxis or throat hemorrhage	respiratory	-0.1386	-0.768	0.491	0.321	-0.431	0.870576	0.46394	1.63395	32	5519	15	2449	0.66618	0.90002	not_significant	-0.0601932	0.176408	2.8627	2.601	3.124	0.133	21.455	0	-0.0513	-0.058	-0.045	0.003	-15.79	0	TRUE
Erectile dysfunction [ED]	genitourinary	0.4309	0.238	0.624	0.098	4.38	1.53864	1.26871	1.86638	434	5117	174	2290	1.18487e-05	0.000321605	mi_significant	0.187137	4.92633	2.9531	2.687	3.219	0.136	21.781	0	-0.0543	-0.061	-0.048	0.003	-16.298	0	TRUE
Esophageal atresia/tracheoesophageal fistula	congenital anomalies	-0.2546	-2.717	2.208	1.256	-0.203	0.775227	0.0660727	9.0975	10	5541	10	2454	0.83943	0.954762	not_significant	-0.110571	0.0760158	2.8613	2.6	3.123	0.133	21.453	0	-0.0513	-0.058	-0.045	0.003	-15.786	0	TRUE
Esophageal bleeding (varices/hemorrhage)	digestive	-0.9407	-2.205	0.323	0.645	-1.459	0.390354	0.110251	1.38127	10	5541	10	2454	0.144659	0.45448	not_significant	-0.408541	0.839654	2.8538	2.592	3.115	0.133	21.386	0	-0.051	-0.057	-0.045	0.003	-15.704	0	TRUE
Esophagitis, GERD and related diseases	digestive	-0.0428	-0.816	0.73	0.394	-0.108	0.958103	0.442197	2.07508	20	5531	11	2453	0.913648	0.972933	not_significant	-0.0185878	0.0392211	2.8609	2.599	3.122	0.133	21.447	0	-0.0512	-0.058	-0.045	0.003	-15.776	0	TRUE
Essential hypertension	circulatory system	-0.0888	-0.253	0.075	0.084	-1.063	0.915029	0.776468	1.07788	461	5090	285	2179	0.287989	0.636019	not_significant	-0.0385653	0.540625	2.8396	2.575	3.104	0.135	21.053	0	-0.0505	-0.057	-0.044	0.003	-15.196	0	TRUE
Essential tremor	neurological	-0.373	-1.446	0.7	0.547	-0.682	0.688665	0.23551	2.01375	10	5541	10	2454	0.495514	0.821513	not_significant	-0.161992	0.304944	2.8603	2.599	3.122	0.133	21.446	0	-0.0512	-0.058	-0.045	0.003	-15.772	0	TRUE
Eustachian tube disorders	sense organs	-0.8488	-1.268	-0.43	0.214	-3.971	0.427928	0.281394	0.650509	44	5507	48	2416	7.1708e-05	0.00153276	con_significant	-0.368629	4.14443	2.863	2.601	3.125	0.133	21.448	0	-0.051	-0.057	-0.045	0.003	-15.703	0	TRUE
Exophthalmos	endocrine/metabolic	-0.1046	-2.392	2.182	1.167	-0.09	0.900685	0.0914466	8.86402	10	5541	10	2454	0.928566	0.978277	not_significant	-0.0454272	0.0321871	2.8614	2.6	3.123	0.133	21.448	0	-0.0513	-0.058	-0.045	0.003	-15.784	0	TRUE
Extrapyramidal disease and abnormal movement disorders	neurological	-0.3213	-1.371	0.728	0.535	-0.6	0.725206	0.253853	2.07093	10	5541	10	2454	0.548489	0.849983	not_significant	-0.139539	0.260832	2.861	2.6	3.122	0.133	21.451	0	-0.0512	-0.058	-0.045	0.003	-15.779	0	TRUE
Eye infection, viral	sense organs	-0.7148	-1.486	0.057	0.394	-1.816	0.48929	0.226276	1.05866	14	5537	13	2451	0.0693857	0.31477	not_significant	-0.310434	1.15873	2.8626	2.601	3.124	0.133	21.461	0	-0.0512	-0.058	-0.045	0.003	-15.775	0	TRUE
Facial nerve disorders [CN7]	neurological	-0.54	-1.469	0.389	0.474	-1.139	0.582748	0.230156	1.4755	10	5541	10	2454	0.254568	0.597759	not_significant	-0.234519	0.594197	2.8596	2.598	3.121	0.133	21.434	0	-0.0512	-0.058	-0.045	0.003	-15.755	0	TRUE
Facial weakness	symptoms	0.0483	-1.247	1.344	0.661	0.073	1.04949	0.287366	3.83435	10	5541	10	2454	0.941786	0.981985	not_significant	0.0209764	0.0260476	2.8613	2.6	3.123	0.133	21.45	0	-0.0513	-0.058	-0.045	0.003	-15.782	0	TRUE
Fasciitis	musculoskeletal	-0.7258	-1.142	-0.309	0.212	-3.417	0.483937	0.31918	0.734181	46	5505	48	2416	0.000634308	0.00925935	con_significant	-0.315211	3.1977	2.8529	2.591	3.115	0.133	21.371	0	-0.0508	-0.057	-0.044	0.003	-15.626	0	TRUE
Femoral hernia	digestive	-0.5876	-2.607	1.432	1.031	-0.57	0.555659	0.0737555	4.18706	10	5541	10	2454	0.568516	0.858101	not_significant	-0.255191	0.245257	2.8604	2.599	3.122	0.133	21.446	0	-0.0512	-0.058	-0.045	0.003	-15.776	0	TRUE
Fever of unknown origin	symptoms	-0.0154	-0.289	0.258	0.139	-0.11	0.984718	0.749012	1.29434	182	5369	81	2383	0.912293	0.972409	not_significant	-0.00668814	0.0398656	2.8616	2.6	3.123	0.133	21.443	0	-0.0512	-0.058	-0.045	0.003	-15.786	0	TRUE
First degree AV block	circulatory system	-0.008	-0.946	0.93	0.479	-0.017	0.992032	0.388291	2.53451	12	5539	10	2454	0.98669	0.997615	not_significant	-0.00347436	0.00581938	2.861	2.599	3.123	0.133	21.435	0	-0.0512	-0.058	-0.045	0.003	-15.765	0	TRUE
Flat foot	musculoskeletal	-0.2003	-0.893	0.493	0.354	-0.566	0.818485	0.409426	1.63722	23	5528	13	2451	0.571217	0.858101	not_significant	-0.0869892	0.243199	2.8616	2.6	3.123	0.133	21.454	0	-0.0512	-0.058	-0.045	0.003	-15.781	0	TRUE
Flatulence	digestive	0.0081	-0.421	0.437	0.219	0.037	1.00813	0.65639	1.54806	73	5478	32	2432	0.970532	0.992792	not_significant	0.00351779	0.0129901	2.861	2.6	3.122	0.133	21.446	0	-0.0512	-0.058	-0.045	0.003	-15.785	0	TRUE
Fluid overload	endocrine/metabolic	0.1463	-0.799	1.092	0.482	0.303	1.15754	0.449779	2.98023	15	5536	10	2454	0.761594	0.920837	not_significant	0.0635373	0.118276	2.8618	2.6	3.123	0.133	21.453	0	-0.0513	-0.058	-0.045	0.003	-15.787	0	TRUE
Foreign body injury		-0.4589	-1.06	0.142	0.307	-1.496	0.631978	0.346456	1.15258	27	5524	19	2445	0.134634	0.43674	not_significant	-0.199298	0.870845	2.8636	2.602	3.125	0.133	21.466	0	-0.0512	-0.058	-0.045	0.003	-15.781	0	TRUE
Fracture of ankle and foot	injuries & poisonings	-1.2095	-1.786	-0.634	0.294	-4.115	0.298346	0.167629	0.530466	20	5531	31	2433	3.8637e-05	0.000856453	con_significant	-0.525279	4.413	2.8637	2.602	3.125	0.134	21.445	0	-0.0511	-0.057	-0.045	0.003	-15.72	0	TRUE
Fracture of clavicle or scapula	injuries & poisonings	-0.8414	-1.52	-0.163	0.346	-2.43	0.431107	0.218712	0.849591	18	5533	17	2447	0.0150954	0.114362	not_significant	-0.365415	1.82115	2.8693	2.608	3.131	0.133	21.496	0	-0.0513	-0.058	-0.045	0.003	-15.809	0	TRUE
Fracture of foot	injuries & poisonings	-0.0778	-1.189	1.034	0.567	-0.137	0.925149	0.304526	2.81229	10	5541	10	2454	0.890919	0.962483	not_significant	-0.0337881	0.0501615	2.8612	2.6	3.123	0.133	21.452	0	-0.0512	-0.058	-0.045	0.003	-15.784	0	TRUE
Fracture of hand or wrist	injuries & poisonings	-0.787	-1.291	-0.283	0.257	-3.061	0.455208	0.274996	0.75352	33	5518	31	2433	0.00220354	0.0248834	con_significant	-0.34179	2.65688	2.8706	2.609	3.132	0.134	21.498	0	-0.0513	-0.058	-0.045	0.003	-15.792	0	TRUE
Fracture of humerus	injuries & poisonings	-0.6278	-1.613	0.357	0.503	-1.249	0.533765	0.199289	1.42904	10	5541	10	2454	0.211664	0.553192	not_significant	-0.27265	0.674353	2.861	2.6	3.122	0.133	21.449	0	-0.0512	-0.058	-0.045	0.003	-15.771	0	TRUE
Fracture of lower limb	injuries & poisonings	-1.5902	-2.443	-0.738	0.435	-3.655	0.203885	0.0868998	0.478069	10	5541	18	2446	0.000257037	0.00454192	con_significant	-0.690615	3.59001	2.8626	2.601	3.124	0.133	21.45	0	-0.0511	-0.058	-0.045	0.003	-15.744	0	TRUE
Fracture of neck of femur	injuries & poisonings	-0.6494	-1.938	0.639	0.658	-0.988	0.522359	0.143992	1.89459	10	5541	10	2454	0.323348	0.675844	not_significant	-0.282031	0.49033	2.8645	2.603	3.126	0.133	21.469	0	-0.0513	-0.058	-0.045	0.003	-15.802	0	TRUE
Fracture of patella	injuries & poisonings	0.2278	-2.074	2.529	1.174	0.194	1.25583	0.125682	12.541	10	5541	10	2454	0.846198	0.954959	not_significant	0.0989323	0.0725281	2.8609	2.6	3.122	0.133	21.45	0	-0.0512	-0.058	-0.045	0.003	-15.785	0	TRUE
Fracture of pelvis	injuries & poisonings	-0.1312	-1.799	1.536	0.851	-0.154	0.877042	0.165464	4.64597	10	5541	10	2454	0.87739	0.958318	not_significant	-0.0569794	0.0568075	2.8615	2.6	3.123	0.133	21.451	0	-0.0513	-0.058	-0.045	0.003	-15.786	0	TRUE
Fracture of radius and ulna	injuries & poisonings	-0.3956	-1.036	0.244	0.327	-1.212	0.673276	0.354871	1.27634	25	5526	16	2448	0.225671	0.569891	not_significant	-0.171807	0.646524	2.8639	2.602	3.125	0.133	21.468	0	-0.0513	-0.058	-0.045	0.003	-15.79	0	TRUE
Fracture of ribs	injuries & poisonings	-0.8585	-1.691	-0.027	0.425	-2.022	0.423797	0.184335	0.973361	10	5541	14	2450	0.0431347	0.22822	not_significant	-0.372842	1.36517	2.8521	2.591	3.114	0.133	21.376	0	-0.051	-0.057	-0.045	0.003	-15.68	0	TRUE
Fracture of tibia and fibula	injuries & poisonings	-1.4628	-2.302	-0.624	0.428	-3.418	0.231587	0.100059	0.535797	10	5541	17	2447	0.000630434	0.00925935	con_significant	-0.635286	3.20036	2.865	2.603	3.127	0.134	21.46	0	-0.0512	-0.058	-0.045	0.003	-15.761	0	TRUE
Fracture of unspecified bones	injuries & poisonings	1.2033	-1	3.406	1.124	1.071	3.33109	0.367879	30.1444	10	5541	10	2454	0.284356	0.632548	not_significant	0.522587	0.546138	2.8627	2.601	3.124	0.133	21.458	0	-0.0513	-0.058	-0.045	0.003	-15.799	0	TRUE
Fracture of unspecified part of femur	injuries & poisonings	0.6235	-1.533	2.78	1.1	0.567	1.86545	0.215887	16.119	10	5541	10	2454	0.570882	0.858101	not_significant	0.270783	0.243454	2.8598	2.598	3.121	0.133	21.44	0	-0.0512	-0.058	-0.045	0.003	-15.778	0	TRUE
Fracture of upper limb	injuries & poisonings	0.0336	-1.629	1.696	0.848	0.04	1.03417	0.196126	5.4521	10	5541	10	2454	0.968443	0.992078	not_significant	0.0145923	0.0139258	2.8611	2.6	3.122	0.133	21.45	0	-0.0512	-0.058	-0.045	0.003	-15.785	0	TRUE
Fracture of vertebral column without mention of spinal cord injury	injuries & poisonings	-0.5601	-1.274	0.154	0.364	-1.538	0.571152	0.279711	1.16649	18	5533	14	2450	0.123986	0.421795	not_significant	-0.243248	0.906628	2.8632	2.602	3.125	0.133	21.465	0	-0.0512	-0.058	-0.045	0.003	-15.783	0	TRUE
Frequency of urination and polyuria	genitourinary	0.1559	-0.14	0.452	0.151	1.033	1.16871	0.869358	1.57145	146	5405	76	2388	0.301561	0.653167	not_significant	0.0677065	0.520625	2.8751	2.612	3.138	0.134	21.445	0	-0.0517	-0.058	-0.045	0.003	-15.781	0	TRUE
Functional digestive disorders	digestive	0.4457	-0.673	1.565	0.571	0.781	1.56158	0.510176	4.78267	16	5535	10	2454	0.435073	0.775604	not_significant	0.193565	0.361438	2.8588	2.597	3.12	0.133	21.427	0	-0.0512	-0.058	-0.045	0.003	-15.771	0	TRUE
Functional disorders of bladder	genitourinary	0.6019	-0.082	1.286	0.349	1.725	1.82558	0.921272	3.61828	39	5512	12	2452	0.084514	0.350046	not_significant	0.261402	1.07307	2.8681	2.607	3.13	0.133	21.492	0	-0.0515	-0.058	-0.045	0.003	-15.848	0	TRUE
Ganglion and cyst of synovium, tendon, and bursa	musculoskeletal	-0.4874	-1.009	0.034	0.266	-1.831	0.614221	0.364583	1.03458	33	5518	27	2437	0.0671054	0.307759	not_significant	-0.211675	1.17324	2.8582	2.597	3.12	0.133	21.425	0	-0.0511	-0.057	-0.045	0.003	-15.724	0	TRUE
Gangrene	symptoms	-0.7171	-2.111	0.676	0.711	-1.009	0.488166	0.121117	1.966	10	5541	10	2454	0.313179	0.664672	not_significant	-0.311433	0.504208	2.8578	2.596	3.119	0.133	21.421	0	-0.0511	-0.058	-0.045	0.003	-15.745	0	TRUE
Gastric ulcer	digestive	0.4209	-1.269	2.11	0.862	0.488	1.52333	0.281113	8.24824	10	5541	10	2454	0.625341	0.882851	not_significant	0.182795	0.203883	2.8624	2.601	3.124	0.133	21.455	0	-0.0513	-0.058	-0.045	0.003	-15.791	0	TRUE
Gastritis and duodenitis, NOS	digestive	0.4219	-0.235	1.079	0.335	1.259	1.52486	0.790571	2.94174	37	5514	13	2451	0.208195	0.54722	not_significant	0.183229	0.681529	2.8652	2.604	3.127	0.133	21.468	0	-0.0514	-0.058	-0.045	0.003	-15.817	0	TRUE
Gastroesophageal laceration-hemorrhage syndrome	digestive	-0.9655	-2.943	1.012	1.009	-0.957	0.380793	0.0527074	2.7511	10	5541	10	2454	0.338481	0.685553	not_significant	-0.419311	0.470466	2.8628	2.601	3.124	0.133	21.461	0	-0.0513	-0.058	-0.045	0.003	-15.792	0	TRUE
Gastrointestinal complications	digestive	-0.5181	-1.358	0.321	0.428	-1.209	0.595651	0.257175	1.37851	13	5538	10	2454	0.226476	0.570718	not_significant	-0.225008	0.644979	2.8619	2.6	3.123	0.133	21.458	0	-0.0512	-0.058	-0.045	0.003	-15.779	0	TRUE
Gastrointestinal malfunction arising from mental factors		1.631	-0.44	3.702	1.057	1.544	5.10898	0.644036	40.5283	10	5541	10	2454	0.122658	0.421795	not_significant	0.708334	0.911304	2.8625	2.601	3.124	0.133	21.456	0	-0.0513	-0.058	-0.045	0.003	-15.802	0	TRUE
Gastroparesis	digestive	0.6401	-0.986	2.266	0.83	0.772	1.89667	0.373066	9.64076	10	5541	10	2454	0.440312	0.779828	not_significant	0.277992	0.35624	2.8635	2.602	3.125	0.133	21.462	0	-0.0513	-0.058	-0.045	0.003	-15.8	0	TRUE
Generalized anxiety disorder	mental disorders	-0.736	-1.025	-0.447	0.148	-4.989	0.479026	0.358796	0.639544	104	5447	92	2372	6.06304e-07	2.19923e-05	con_significant	-0.319641	6.21731	2.8877	2.626	3.15	0.134	21.604	0	-0.0514	-0.058	-0.045	0.003	-15.821	0	TRUE
Generalized convulsive epilepsy	neurological	-0.6511	-2.179	0.877	0.779	-0.835	0.521472	0.113155	2.40368	10	5541	10	2454	0.40352	0.751187	not_significant	-0.282769	0.394135	2.8626	2.601	3.124	0.133	21.461	0	-0.0513	-0.058	-0.045	0.003	-15.792	0	TRUE
Genetic Test		-0.5617	-1.392	0.268	0.423	-1.327	0.570239	0.248578	1.30735	14	5537	10	2454	0.184624	0.52094	not_significant	-0.243943	0.733713	2.8648	2.603	3.126	0.133	21.472	0	-0.0513	-0.058	-0.045	0.003	-15.797	0	TRUE
Genu valgum or varum (acquired)	musculoskeletal	-2.7589	-4.244	-1.274	0.758	-3.641	0.0633614	0.0143501	0.279711	10	5541	15	2449	0.000271859	0.00468643	con_significant	-1.19818	3.56566	2.8614	2.6	3.123	0.134	21.428	0	-0.0511	-0.057	-0.045	0.003	-15.726	0	TRUE
GERD	digestive	-0.2229	-0.4	-0.046	0.09	-2.468	0.800195	0.67032	0.955042	372	5179	226	2238	0.0135737	0.104824	not_significant	-0.0968042	1.8673	2.8522	2.591	3.114	0.133	21.376	0	-0.0506	-0.057	-0.044	0.003	-15.531	0	TRUE
Gingivitis	digestive	-0.1663	-2.051	1.719	0.962	-0.173	0.846792	0.128606	5.57895	10	5541	10	2454	0.862676	0.958318	not_significant	-0.0722232	0.0641524	2.8609	2.599	3.122	0.133	21.449	0	-0.0512	-0.058	-0.045	0.003	-15.781	0	TRUE
Glaucoma	sense organs	-0.1501	-0.675	0.374	0.268	-0.561	0.860622	0.509156	1.45354	39	5512	25	2439	0.574935	0.858101	not_significant	-0.0651876	0.240381	2.8588	2.597	3.12	0.133	21.421	0	-0.0512	-0.058	-0.045	0.003	-15.736	0	TRUE
Glossitis	digestive	-0.201	-1.625	1.223	0.727	-0.277	0.817912	0.196912	3.39736	10	5541	10	2454	0.782043	0.937043	not_significant	-0.0872932	0.106769	2.8615	2.6	3.123	0.133	21.455	0	-0.0512	-0.058	-0.045	0.003	-15.787	0	TRUE
Glossodynia	digestive	0.162	-1.552	1.876	0.874	0.185	1.17586	0.211824	6.52734	10	5541	10	2454	0.853059	0.954959	not_significant	0.0703557	0.069021	2.8615	2.6	3.123	0.133	21.452	0	-0.0513	-0.058	-0.045	0.003	-15.786	0	TRUE
Glucocorticoid deficiency	endocrine/metabolic	1.306	-0.007	2.619	0.67	1.95	3.69138	0.993024	13.722	18	5533	10	2454	0.0512118	0.254359	not_significant	0.567189	1.29063	2.8678	2.606	3.129	0.133	21.499	0	-0.0515	-0.058	-0.045	0.003	-15.851	0	TRUE
Gonococcal infections	infectious diseases	-0.2852	-2.806	2.235	1.286	-0.222	0.751864	0.0604463	9.34648	10	5541	10	2454	0.824472	0.953093	not_significant	-0.123861	0.0838241	2.8613	2.6	3.123	0.133	21.454	0	-0.0512	-0.058	-0.045	0.003	-15.787	0	TRUE
Gout	endocrine/metabolic	0.0395	-0.361	0.44	0.204	0.193	1.04029	0.696979	1.55271	71	5480	41	2423	0.846913	0.954959	not_significant	0.0171546	0.0721613	2.8629	2.601	3.125	0.134	21.413	0	-0.0513	-0.058	-0.045	0.003	-15.733	0	TRUE
Gouty arthropathy	endocrine/metabolic	-0.2252	-0.846	0.395	0.317	-0.711	0.798357	0.429128	1.48438	27	5524	17	2447	0.476859	0.803835	not_significant	-0.0978031	0.32161	2.8602	2.599	3.122	0.133	21.444	0	-0.0512	-0.058	-0.045	0.003	-15.764	0	TRUE
Gram negative septicemia	infectious diseases	1.2488	-0.257	2.755	0.768	1.626	3.48616	0.773368	15.721	14	5537	10	2454	0.104046	0.390345	not_significant	0.542347	0.982775	2.8627	2.601	3.124	0.133	21.45	0	-0.0513	-0.058	-0.045	0.003	-15.8	0	TRUE
Gram positive septicemia	infectious diseases	0.5389	-1.122	2.2	0.847	0.636	1.71412	0.325628	9.02501	10	5541	10	2454	0.524832	0.840695	not_significant	0.234041	0.27998	2.8626	2.601	3.124	0.133	21.455	0	-0.0513	-0.058	-0.045	0.003	-15.793	0	TRUE
Graves' disease	endocrine/metabolic	-0.1365	-1.507	1.234	0.699	-0.195	0.872406	0.221574	3.43494	10	5541	10	2454	0.845263	0.954959	not_significant	-0.0592812	0.0730084	2.8617	2.6	3.123	0.133	21.451	0	-0.0513	-0.058	-0.045	0.003	-15.786	0	TRUE
Gross hematuria	genitourinary	-0.0358	-0.893	0.821	0.437	-0.082	0.964833	0.409426	2.27277	15	5536	10	2454	0.934711	0.979728	not_significant	-0.0155477	0.0293226	2.8608	2.599	3.122	0.133	21.443	0	-0.0512	-0.058	-0.045	0.003	-15.772	0	TRUE
H. pylori	infectious diseases	0.2425	-0.554	1.039	0.406	0.597	1.27443	0.574647	2.82639	22	5529	10	2454	0.550422	0.849983	not_significant	0.105316	0.259304	2.8623	2.601	3.124	0.133	21.456	0	-0.0513	-0.058	-0.045	0.003	-15.794	0	TRUE
Hallucinations	mental disorders	-0.2683	-2.705	2.168	1.243	-0.216	0.764678	0.0668703	8.74078	10	5541	10	2454	0.829161	0.953093	not_significant	-0.116521	0.081361	2.8614	2.6	3.123	0.133	21.453	0	-0.0513	-0.058	-0.045	0.003	-15.786	0	TRUE
Hallux rigidus	musculoskeletal	0.5061	-1.769	2.781	1.161	0.436	1.65881	0.170503	16.1351	10	5541	10	2454	0.662821	0.897618	not_significant	0.219796	0.178604	2.8616	2.6	3.123	0.133	21.454	0	-0.0513	-0.058	-0.045	0.003	-15.789	0	TRUE
Hallux valgus (Bunion)	musculoskeletal	-0.1722	-1.019	0.674	0.432	-0.399	0.841811	0.360956	1.96207	15	5536	10	2454	0.690145	0.907807	not_significant	-0.0747855	0.161059	2.8606	2.599	3.122	0.133	21.448	0	-0.0512	-0.058	-0.045	0.003	-15.775	0	TRUE
Hammer toe (acquired)	musculoskeletal	0.2007	-1.354	1.755	0.793	0.253	1.22226	0.258205	5.78345	10	5541	10	2454	0.800243	0.946533	not_significant	0.0871629	0.0967779	2.8623	2.601	3.124	0.133	21.447	0	-0.0513	-0.058	-0.045	0.003	-15.782	0	TRUE
Hearing loss	sense organs	-0.6289	-0.99	-0.268	0.184	-3.411	0.533178	0.371577	0.764908	63	5488	64	2400	0.000647076	0.00933193	con_significant	-0.273128	3.18904	2.8406	2.579	3.102	0.134	21.257	0	-0.0505	-0.057	-0.044	0.003	-15.489	0	TRUE
Heart failure NOS	circulatory system	0.0506	-0.944	1.045	0.508	0.1	1.0519	0.389068	2.8434	13	5538	10	2454	0.920585	0.976065	not_significant	0.0219753	0.0359359	2.8613	2.6	3.123	0.133	21.452	0	-0.0513	-0.058	-0.045	0.003	-15.783	0	TRUE
Heart failure with preserved EF [Diastolic heart failure]	circulatory system	-0.1371	-1.821	1.547	0.859	-0.16	0.871883	0.161864	4.69736	10	5541	10	2454	0.873228	0.958318	not_significant	-0.0595418	0.0588725	2.8602	2.599	3.122	0.134	21.424	0	-0.0512	-0.058	-0.045	0.003	-15.757	0	TRUE
Heart failure with reduced EF [Systolic or combined heart failure]	circulatory system	-0.2303	-1.047	0.586	0.417	-0.553	0.794295	0.350989	1.79679	14	5537	13	2451	0.58041	0.863914	not_significant	-0.100018	0.236265	2.8564	2.594	3.118	0.134	21.369	0	-0.0511	-0.057	-0.045	0.003	-15.694	0	TRUE
Heart transplant/surgery	circulatory system	-1.6171	-3.92	0.686	1.175	-1.376	0.198473	0.0198411	1.98576	10	5541	10	2454	0.168736	0.492317	not_significant	-0.702298	0.772793	2.8545	2.593	3.116	0.134	21.376	0	-0.0511	-0.057	-0.045	0.003	-15.704	0	TRUE
Heart valve replaced	circulatory system	-1.2051	-2.562	0.152	0.692	-1.74	0.299662	0.0771503	1.16416	10	5541	10	2454	0.0817741	0.342123	not_significant	-0.523368	1.08738	2.8492	2.587	3.111	0.134	21.331	0	-0.0509	-0.057	-0.045	0.003	-15.649	0	TRUE
Heartburn	digestive	-0.5824	-1.101	-0.064	0.265	-2.201	0.558556	0.332538	0.938005	32	5519	29	2435	0.0277237	0.167806	not_significant	-0.252933	1.55715	2.857	2.595	3.119	0.133	21.41	0	-0.051	-0.057	-0.045	0.003	-15.702	0	TRUE
Hemangioma and lymphangioma, any site	neoplasms	-0.3984	-0.908	0.111	0.26	-1.532	0.671393	0.40333	1.11739	35	5516	28	2436	0.125449	0.421803	not_significant	-0.173023	0.901534	2.8555	2.594	3.117	0.133	21.402	0	-0.051	-0.057	-0.045	0.003	-15.7	0	TRUE
Hemangioma of skin and subcutaneous tissue	neoplasms	-1.4413	-2.081	-0.802	0.326	-4.418	0.23662	0.124805	0.448431	14	5537	33	2431	9.96279e-06	0.000277336	con_significant	-0.625949	5.00162	2.8407	2.579	3.103	0.134	21.253	0	-0.0505	-0.057	-0.044	0.003	-15.513	0	TRUE
Hemarthrosis	musculoskeletal	-1.3519	-3.817	1.113	1.258	-1.075	0.258748	0.0219937	3.04348	10	5541	10	2454	0.28238	0.632009	not_significant	-0.587123	0.549166	2.8603	2.599	3.122	0.133	21.446	0	-0.0512	-0.058	-0.045	0.003	-15.774	0	TRUE
Hematemesis	digestive	0.1173	-1.493	1.728	0.822	0.143	1.12446	0.224698	5.62938	10	5541	10	2454	0.886503	0.96028	not_significant	0.0509427	0.0523197	2.8607	2.599	3.122	0.133	21.445	0	-0.0512	-0.058	-0.045	0.003	-15.782	0	TRUE
Hematuria	genitourinary	-0.114	-0.485	0.257	0.189	-0.603	0.892258	0.615697	1.29305	83	5468	48	2416	0.546762	0.849983	not_significant	-0.0495096	0.262202	2.8592	2.598	3.121	0.133	21.428	0	-0.0512	-0.058	-0.045	0.003	-15.734	0	TRUE
Hemiplegia	neurological	-0.3093	-1.938	1.32	0.831	-0.372	0.733961	0.143992	3.74342	10	5541	10	2454	0.709781	0.908296	not_significant	-0.134327	0.148876	2.8596	2.598	3.121	0.133	21.431	0	-0.0512	-0.058	-0.045	0.003	-15.761	0	TRUE
Hemoglobinuria	hematopoietic	0.5803	-1.656	2.816	1.141	0.509	1.78657	0.190901	16.7099	10	5541	10	2454	0.611003	0.875321	not_significant	0.252021	0.213956	2.8609	2.6	3.122	0.133	21.449	0	-0.0513	-0.058	-0.045	0.003	-15.785	0	TRUE
Hemoptysis	respiratory	1.206	-0.015	2.427	0.623	1.936	3.3401	0.985112	11.3249	22	5529	10	2454	0.0529279	0.257809	not_significant	0.523759	1.27632	2.8593	2.598	3.121	0.133	21.429	0	-0.0513	-0.058	-0.045	0.003	-15.786	0	TRUE
Hemorrhage NOS	circulatory system	-0.715	-2.002	0.572	0.657	-1.089	0.489192	0.135065	1.77181	10	5541	10	2454	0.276284	0.628449	not_significant	-0.310521	0.558644	2.8655	2.604	3.127	0.133	21.474	0	-0.0513	-0.058	-0.045	0.003	-15.807	0	TRUE
Hemorrhage of gastrointestinal tract	digestive	0.6339	-0.249	1.516	0.45	1.408	1.88495	0.77958	4.55397	23	5528	10	2454	0.159133	0.477398	not_significant	0.275299	0.798241	2.8663	2.605	3.128	0.133	21.478	0	-0.0514	-0.058	-0.045	0.003	-15.826	0	TRUE
Hemorrhage of rectum and anus	digestive	-0.3628	-0.706	-0.02	0.175	-2.072	0.695726	0.493615	0.980199	88	5463	57	2407	0.038278	0.213111	not_significant	-0.157562	1.41705	2.8661	2.605	3.128	0.133	21.476	0	-0.0512	-0.058	-0.045	0.003	-15.764	0	TRUE
Hemorrhage or hematoma complicating a procedure	injuries & poisonings	-0.286	-1.315	0.743	0.525	-0.545	0.751263	0.268474	2.10223	10	5541	10	2454	0.586047	0.863914	not_significant	-0.124208	0.232068	2.8615	2.6	3.123	0.133	21.455	0	-0.0512	-0.058	-0.045	0.003	-15.784	0	TRUE
Hemorrhoids	circulatory system	-0.6048	-0.837	-0.373	0.118	-5.109	0.546184	0.433008	0.688665	165	5386	151	2313	3.24393e-07	1.25257e-05	con_significant	-0.262661	6.48893	2.8321	2.57	3.094	0.134	21.212	0	-0.0499	-0.056	-0.043	0.003	-15.307	0	TRUE
Hepatitis NOS	infectious diseases	0.2573	-0.798	1.312	0.538	0.478	1.29343	0.450229	3.71359	13	5538	10	2454	0.632609	0.884687	not_significant	0.111744	0.198865	2.8615	2.6	3.123	0.133	21.453	0	-0.0513	-0.058	-0.045	0.003	-15.79	0	TRUE
Hepatomegaly	digestive	0.0011	-0.795	0.798	0.406	0.003	1.0011	0.451581	2.22109	21	5530	10	2454	0.99783	0.998665	not_significant	0.000477724	0.000943317	2.8611	2.6	3.123	0.133	21.45	0	-0.0512	-0.058	-0.045	0.003	-15.785	0	TRUE
Hereditary and idiopathic peripheral neuropathy	neurological	1.0509	0.07	2.032	0.501	2.099	2.86022	1.07251	7.62933	26	5525	10	2454	0.0358121	0.202203	not_significant	0.4564	1.44597	2.8682	2.606	3.13	0.134	21.473	0	-0.0515	-0.058	-0.045	0.003	-15.836	0	TRUE
Hereditary hemochromatosis	hematopoietic	0.7196	-1.479	2.918	1.122	0.642	2.05361	0.227865	18.5042	10	5541	10	2454	0.521117	0.840258	not_significant	0.312518	0.283064	2.8614	2.6	3.123	0.133	21.454	0	-0.0513	-0.058	-0.045	0.003	-15.79	0	TRUE
Herpes simplex	infectious diseases	-0.1578	-0.471	0.156	0.16	-0.987	0.854021	0.624378	1.16883	113	5438	67	2397	0.323725	0.675844	not_significant	-0.0685317	0.489824	2.8578	2.596	3.119	0.133	21.423	0	-0.0511	-0.057	-0.045	0.003	-15.71	0	TRUE
Herpes zoster	infectious diseases	-0.493	-0.989	0.003	0.253	-1.948	0.610791	0.371948	1.003	37	5514	30	2434	0.0514258	0.254366	not_significant	-0.214107	1.28882	2.8582	2.597	3.12	0.133	21.429	0	-0.0511	-0.057	-0.045	0.003	-15.722	0	TRUE
Herpes zoster with nervous system complications	infectious diseases	0.2221	-2.075	2.519	1.172	0.19	1.2487	0.125556	12.4162	10	5541	10	2454	0.849693	0.954959	not_significant	0.0964568	0.0707381	2.8609	2.6	3.122	0.133	21.45	0	-0.0512	-0.058	-0.045	0.003	-15.784	0	TRUE
Hidradenitis	dermatologic	-0.4623	-2.183	1.259	0.878	-0.527	0.629833	0.112703	3.5219	10	5541	10	2454	0.598511	0.870495	not_significant	-0.200774	0.222928	2.863	2.601	3.125	0.133	21.457	0	-0.0513	-0.058	-0.045	0.003	-15.792	0	TRUE
HIV infection, symptomatic	infectious diseases	1.3274	-0.814	3.469	1.092	1.215	3.77123	0.443082	32.1046	10	5541	10	2454	0.224311	0.567653	not_significant	0.576482	0.64915	2.8648	2.603	3.126	0.133	21.468	0	-0.0514	-0.058	-0.045	0.003	-15.81	0	TRUE
Hodgkin's disease	neoplasms	0.4951	-0.594	1.585	0.556	0.891	1.64066	0.552114	4.87929	19	5532	10	2454	0.373161	0.716373	not_significant	0.215019	0.428104	2.8562	2.595	3.118	0.133	21.399	0	-0.0512	-0.058	-0.045	0.003	-15.749	0	TRUE
Hydrocele	genitourinary	-0.2493	-0.7	0.202	0.23	-1.083	0.779346	0.496585	1.22385	54	5497	33	2431	0.278716	0.629478	not_significant	-0.10827	0.554838	2.8606	2.599	3.122	0.133	21.449	0	-0.0512	-0.058	-0.045	0.003	-15.757	0	TRUE
Hydrocephalus	neurological	-0.1886	-2.028	1.651	0.939	-0.201	0.828118	0.131598	5.21219	10	5541	10	2454	0.840701	0.954762	not_significant	-0.0819079	0.0753585	2.8608	2.599	3.122	0.133	21.449	0	-0.0512	-0.058	-0.045	0.003	-15.781	0	TRUE
Hydronephrosis	genitourinary	-0.3918	-0.992	0.209	0.306	-1.279	0.675839	0.370834	1.23244	27	5524	20	2444	0.200913	0.535084	not_significant	-0.170157	0.696992	2.8592	2.598	3.121	0.133	21.434	0	-0.0511	-0.058	-0.045	0.003	-15.745	0	TRUE
Hypercalcemia	endocrine/metabolic	-0.1148	-1.089	0.86	0.497	-0.231	0.891544	0.336553	2.36316	11	5540	10	2454	0.817422	0.953093	not_significant	-0.049857	0.0875535	2.8604	2.599	3.122	0.133	21.442	0	-0.0512	-0.058	-0.045	0.003	-15.77	0	TRUE
Hypercholesterolemia	endocrine/metabolic	-0.3546	-0.607	-0.102	0.129	-2.75	0.701454	0.544983	0.90303	153	5398	117	2347	0.00596521	0.0562233	not_significant	-0.154001	2.22437	2.8381	2.576	3.1	0.134	21.23	0	-0.0504	-0.057	-0.044	0.003	-15.425	0	TRUE
Hyperestrogenism	endocrine/metabolic	0.0729	-2.221	2.367	1.171	0.062	1.07562	0.108501	10.6653	10	5541	10	2454	0.950316	0.985533	not_significant	0.0316601	0.0221321	2.861	2.6	3.122	0.133	21.449	0	-0.0512	-0.058	-0.045	0.003	-15.784	0	TRUE
Hyperglyceridemia	endocrine/metabolic	-0.4771	-0.821	-0.133	0.175	-2.72	0.62058	0.439991	0.875465	83	5468	58	2406	0.00652513	0.0600814	not_significant	-0.207202	2.18541	2.8726	2.611	3.134	0.134	21.507	0	-0.0513	-0.058	-0.045	0.003	-15.792	0	TRUE
Hyperhidrosis	dermatologic	-0.2492	-0.748	0.25	0.255	-0.979	0.779424	0.473312	1.28403	44	5507	26	2438	0.32769	0.67643	not_significant	-0.108226	0.484537	2.8623	2.601	3.124	0.133	21.456	0	-0.0512	-0.058	-0.045	0.003	-15.774	0	TRUE
Hyperlipidemia	endocrine/metabolic	-0.2109	-0.347	-0.075	0.069	-3.042	0.809855	0.706805	0.927743	690	4861	443	2021	0.0023509	0.0251649	con_significant	-0.0915927	2.62877	2.8078	2.544	3.071	0.134	20.876	0	-0.0491	-0.056	-0.043	0.003	-14.795	0	TRUE
Hypermetropia	sense organs	-0.1749	-1.15	0.8	0.497	-0.352	0.839541	0.316637	2.22554	11	5540	10	2454	0.725022	0.908296	not_significant	-0.0759581	0.139649	2.8605	2.599	3.122	0.133	21.445	0	-0.0512	-0.058	-0.045	0.003	-15.773	0	TRUE
Hyperosmolality and/or hypernatremia	endocrine/metabolic	-1.0063	-2.4	0.388	0.711	-1.415	0.365569	0.090718	1.47403	10	5541	10	2454	0.157106	0.473694	not_significant	-0.437031	0.803806	2.8619	2.6	3.123	0.133	21.445	0	-0.0512	-0.058	-0.045	0.003	-15.773	0	TRUE
Hyperparathyroidism	endocrine/metabolic	0.8677	-0.705	2.44	0.802	1.081	2.38143	0.494109	11.473	10	5541	10	2454	0.279537	0.629558	not_significant	0.376837	0.553561	2.8628	2.601	3.124	0.133	21.456	0	-0.0513	-0.058	-0.045	0.003	-15.798	0	TRUE
Hyperplasia of prostate	genitourinary	0.5673	0.229	0.906	0.173	3.286	1.7635	1.25734	2.47441	116	5435	62	2402	0.00101497	0.0138059	mi_significant	0.246375	2.99355	2.9739	2.703	3.244	0.138	21.552	0	-0.0544	-0.061	-0.048	0.003	-16.058	0	TRUE
Hyperpotassemia	endocrine/metabolic	0.0256	-0.749	0.8	0.395	0.065	1.02593	0.472839	2.22554	21	5530	10	2454	0.948297	0.985533	not_significant	0.0111179	0.0230554	2.8612	2.6	3.123	0.133	21.452	0	-0.0513	-0.058	-0.045	0.003	-15.784	0	TRUE
Hypersensitivity angiitis	circulatory system	-0.8392	-2.821	1.142	1.011	-0.83	0.432056	0.0595464	3.13303	10	5541	10	2454	0.40644	0.75147	not_significant	-0.36446	0.391003	2.8618	2.6	3.123	0.133	21.455	0	-0.0513	-0.058	-0.045	0.003	-15.786	0	TRUE
Hypersomnia	neurological	-0.6639	-0.988	-0.339	0.166	-4.01	0.51484	0.372321	0.712482	80	5471	77	2387	6.08155e-05	0.00132357	con_significant	-0.288328	4.21599	2.8506	2.589	3.112	0.134	21.35	0	-0.0506	-0.057	-0.044	0.003	-15.564	0	TRUE
Hypertension	circulatory system	-1.8886	-4.198	0.421	1.178	-1.603	0.151283	0.0150256	1.52348	10	5541	10	2454	0.108943	0.397339	not_significant	-0.820209	0.962802	2.8616	2.6	3.123	0.133	21.452	0	-0.0512	-0.058	-0.045	0.003	-15.779	0	TRUE
Hypertensive chronic kidney disease	circulatory system	0.0046	-0.627	0.637	0.322	0.014	1.00461	0.534192	1.8908	29	5522	17	2447	0.988709	0.997615	not_significant	0.00199775	0.00493136	2.8612	2.6	3.123	0.133	21.437	0	-0.0512	-0.058	-0.045	0.003	-15.764	0	TRUE
Hypertensive heart and/or renal disease	circulatory system	-0.5997	-2.413	1.214	0.925	-0.648	0.548976	0.0895463	3.36693	10	5541	10	2454	0.516834	0.837145	not_significant	-0.260446	0.286649	2.8561	2.594	3.118	0.134	21.375	0	-0.0511	-0.057	-0.045	0.003	-15.708	0	TRUE
Hypertensive heart disease	circulatory system	0.2563	-1.134	1.646	0.709	0.361	1.29214	0.321744	5.18619	10	5541	10	2454	0.717808	0.908296	not_significant	0.11131	0.143991	2.8644	2.602	3.126	0.134	21.424	0	-0.0513	-0.058	-0.045	0.003	-15.765	0	TRUE
Hypertrophic obstructive cardiomyopathy	circulatory system	-1.2304	-3.088	0.628	0.948	-1.298	0.292176	0.045593	1.87386	10	5541	10	2454	0.194301	0.527179	not_significant	-0.534356	0.711524	2.8621	2.601	3.124	0.133	21.45	0	-0.0513	-0.058	-0.045	0.003	-15.78	0	TRUE
Hypertrophy of breast (Gynecomastia)	genitourinary	0.4009	-0.511	1.313	0.466	0.861	1.49317	0.599895	3.71731	23	5528	10	2454	0.389098	0.735782	not_significant	0.174109	0.409941	2.8579	2.596	3.119	0.133	21.417	0	-0.0512	-0.058	-0.045	0.003	-15.766	0	TRUE
Hypertrophy of salivary gland	digestive	-0.3509	-2.762	2.06	1.23	-0.285	0.704054	0.0631653	7.84597	10	5541	10	2454	0.775391	0.933745	not_significant	-0.152394	0.110479	2.8617	2.6	3.123	0.133	21.453	0	-0.0513	-0.058	-0.045	0.003	-15.787	0	TRUE
Hyperventilation	respiratory	0.0064	-1.279	1.292	0.656	0.01	1.00642	0.278315	3.64006	10	5541	10	2454	0.992152	0.998184	not_significant	0.00277948	0.00342177	2.8611	2.6	3.123	0.133	21.452	0	-0.0512	-0.058	-0.045	0.003	-15.785	0	TRUE
Hypocalcemia	endocrine/metabolic	0.1034	-1.079	1.285	0.603	0.171	1.10893	0.339935	3.61467	10	5541	10	2454	0.863936	0.958318	not_significant	0.044906	0.0635184	2.861	2.6	3.122	0.133	21.45	0	-0.0512	-0.058	-0.045	0.003	-15.785	0	TRUE
Hypoglycemia	endocrine/metabolic	0.0826	-1.157	1.322	0.632	0.131	1.08611	0.314428	3.75092	10	5541	10	2454	0.896054	0.967085	not_significant	0.0358727	0.047666	2.8613	2.6	3.123	0.133	21.452	0	-0.0513	-0.058	-0.045	0.003	-15.785	0	TRUE
Hypopotassemia	endocrine/metabolic	0.0943	-0.48	0.669	0.293	0.322	1.09889	0.618783	1.95228	40	5511	19	2445	0.747583	0.91749	not_significant	0.040954	0.126341	2.8621	2.601	3.124	0.133	21.453	0	-0.0513	-0.058	-0.045	0.003	-15.785	0	TRUE
Hyposmolality and/or hyponatremia	endocrine/metabolic	0.2538	-0.384	0.891	0.325	0.78	1.28891	0.681131	2.43757	35	5516	14	2450	0.435238	0.775604	not_significant	0.110224	0.361273	2.8629	2.601	3.124	0.133	21.457	0	-0.0513	-0.058	-0.045	0.003	-15.799	0	TRUE
Hypotension NOS	circulatory system	-0.275	-0.999	0.449	0.369	-0.745	0.759572	0.368248	1.56674	20	5531	14	2450	0.456434	0.792808	not_significant	-0.119431	0.340622	2.8589	2.597	3.12	0.133	21.432	0	-0.0512	-0.058	-0.045	0.003	-15.75	0	TRUE
Hypothermia/Chills	symptoms	-0.6648	-1.528	0.198	0.44	-1.509	0.514376	0.216969	1.21896	12	5539	10	2454	0.131207	0.430287	not_significant	-0.288719	0.882043	2.8634	2.602	3.125	0.133	21.469	0	-0.0513	-0.058	-0.045	0.003	-15.789	0	TRUE
Hypothyroidism NOS	endocrine/metabolic	0.4999	0.196	0.804	0.155	3.22	1.64856	1.21653	2.23446	171	5380	65	2399	0.00128277	0.0158297	mi_significant	0.217104	2.89185	2.91	2.646	3.174	0.135	21.63	0	-0.0528	-0.059	-0.046	0.003	-16.06	0	TRUE
Hypoventilation	respiratory	0.7986	-1.357	2.954	1.1	0.726	2.22243	0.257432	19.1825	10	5541	10	2454	0.467846	0.796603	not_significant	0.346828	0.329897	2.8605	2.599	3.122	0.133	21.448	0	-0.0512	-0.058	-0.045	0.003	-15.785	0	TRUE
Hypovolemia	endocrine/metabolic	0.1188	-0.463	0.701	0.297	0.4	1.12614	0.629393	2.01577	41	5510	18	2446	0.689099	0.907807	not_significant	0.0515942	0.161719	2.8616	2.6	3.123	0.133	21.454	0	-0.0513	-0.058	-0.045	0.003	-15.79	0	TRUE
Iatrogenic hypotension	circulatory system	-0.4851	-2.667	1.697	1.113	-0.436	0.615636	0.0694603	5.45755	10	5541	10	2454	0.662965	0.897618	not_significant	-0.210676	0.178509	2.8605	2.599	3.122	0.133	21.441	0	-0.0512	-0.058	-0.045	0.003	-15.773	0	TRUE
Immunity deficiency	endocrine/metabolic	-0.221	-1.123	0.681	0.46	-0.48	0.801717	0.325302	1.97585	14	5537	10	2454	0.630965	0.884687	not_significant	-0.0959791	0.199995	2.8611	2.6	3.122	0.133	21.455	0	-0.0512	-0.058	-0.045	0.003	-15.782	0	TRUE
Impacted cerumen	sense organs	-0.3597	-0.669	-0.05	0.158	-2.278	0.697886	0.512221	0.951229	105	5446	73	2391	0.0227478	0.152273	not_significant	-0.156216	1.64306	2.8584	2.597	3.12	0.133	21.423	0	-0.051	-0.057	-0.045	0.003	-15.683	0	TRUE
Impaired fasting glucose	endocrine/metabolic	-0.2928	-0.574	-0.012	0.143	-2.043	0.746171	0.563268	0.988072	127	5424	91	2373	0.041028	0.224249	not_significant	-0.127161	1.38692	2.8468	2.585	3.109	0.134	21.316	0	-0.0507	-0.057	-0.044	0.003	-15.552	0	TRUE
Impetigo	dermatologic	-0.5852	-1.286	0.115	0.357	-1.637	0.556994	0.276374	1.12187	18	5533	15	2449	0.101627	0.38617	not_significant	-0.254149	0.992993	2.8622	2.601	3.124	0.133	21.454	0	-0.0512	-0.058	-0.045	0.003	-15.769	0	TRUE
Incisional hernia	digestive	-0.5014	-2.515	1.512	1.027	-0.488	0.605682	0.0808629	4.53579	10	5541	10	2454	0.625445	0.882851	not_significant	-0.217755	0.203811	2.8601	2.599	3.122	0.133	21.443	0	-0.0512	-0.058	-0.045	0.003	-15.773	0	TRUE
Infection of the eye	sense organs	-0.3113	-2.753	2.131	1.246	-0.25	0.732494	0.0637364	8.42329	10	5541	10	2454	0.802665	0.947337	not_significant	-0.135196	0.0954655	2.8615	2.6	3.123	0.133	21.453	0	-0.0513	-0.058	-0.045	0.003	-15.787	0	TRUE
Infection with drug-resistant microorganisms	infectious diseases	1.7268	-0.347	3.801	1.058	1.632	5.62263	0.706805	44.7459	11	5540	10	2454	0.102719	0.387871	not_significant	0.74994	0.988348	2.8632	2.602	3.125	0.133	21.451	0	-0.0513	-0.058	-0.045	0.003	-15.8	0	TRUE
Infection/inflammation of internal prosthetic device; implant; and graft	infectious diseases	-0.0045	-1.146	1.137	0.582	-0.008	0.99551	0.317906	3.1174	10	5541	10	2454	0.993892	0.998476	not_significant	-0.00195433	0.00266094	2.8611	2.6	3.123	0.133	21.449	0	-0.0512	-0.058	-0.045	0.003	-15.78	0	TRUE
Infectious mononucleosis	infectious diseases	-0.5023	-1.557	0.552	0.538	-0.934	0.605137	0.210767	1.73672	10	5541	10	2454	0.350485	0.693989	not_significant	-0.218146	0.455331	2.8633	2.602	3.125	0.133	21.464	0	-0.0513	-0.058	-0.045	0.003	-15.793	0	TRUE
Infective connective tissue disorders	musculoskeletal	-0.589	-2.774	1.596	1.115	-0.528	0.554882	0.0624119	4.93326	10	5541	10	2454	0.597165	0.870495	not_significant	-0.255799	0.223906	2.8608	2.599	3.122	0.133	21.442	0	-0.0512	-0.058	-0.045	0.003	-15.774	0	TRUE
Infertility, female	genitourinary	3.2836	2.655	3.912	0.321	10.243	26.6716	14.225	49.9988	558	4993	10	2454	1.27235e-24	3.31005e-22	mi_significant	1.42605	23.8954	2.7227	2.457	2.988	0.136	20.085	0	-0.0503	-0.057	-0.044	0.003	-15.23	0	TRUE
Infertility, female, associated with anovulation	genitourinary	1.0278	-1.097	3.152	1.084	0.948	2.79491	0.333871	23.3828	10	5541	10	2454	0.34299	0.69124	not_significant	0.446368	0.464719	2.8607	2.599	3.122	0.133	21.449	0	-0.0513	-0.058	-0.045	0.003	-15.788	0	TRUE
Infestation (lice, mites)	infectious diseases	-0.5008	-1.787	0.785	0.656	-0.763	0.606046	0.167462	2.19241	10	5541	10	2454	0.445343	0.783848	not_significant	-0.217495	0.351305	2.8625	2.601	3.124	0.133	21.46	0	-0.0513	-0.058	-0.045	0.003	-15.791	0	TRUE
Inflammation of eyelids	sense organs	-0.298	-0.703	0.107	0.207	-1.441	0.742301	0.495098	1.11293	63	5488	41	2423	0.149549	0.46018	not_significant	-0.12942	0.825216	2.8603	2.599	3.122	0.133	21.442	0	-0.0511	-0.057	-0.045	0.003	-15.74	0	TRUE
Inflammatory and toxic neuropathy	neurological	0.0145	-0.618	0.647	0.323	0.045	1.01461	0.539021	1.9098	28	5523	16	2448	0.964246	0.991243	not_significant	0.00629727	0.0158121	2.8613	2.6	3.123	0.133	21.438	0	-0.0513	-0.058	-0.045	0.003	-15.766	0	TRUE
Inflammatory conditions of jaw	digestive	-0.1864	-2.588	2.215	1.225	-0.152	0.829942	0.0751702	9.16141	10	5541	10	2454	0.879059	0.958318	not_significant	-0.0809525	0.0559822	2.8613	2.6	3.123	0.133	21.452	0	-0.0512	-0.058	-0.045	0.003	-15.786	0	TRUE
Influenza	respiratory	-0.683	-1.097	-0.269	0.211	-3.23	0.505099	0.333871	0.764143	50	5501	45	2419	0.0012359	0.015738	con_significant	-0.296623	2.90802	2.865	2.604	3.127	0.133	21.475	0	-0.0511	-0.057	-0.045	0.003	-15.744	0	TRUE
Infusion and transfusion reaction	injuries & poisonings	0.6407	-1.537	2.819	1.111	0.577	1.89781	0.215025	16.7601	10	5541	10	2454	0.564231	0.856332	not_significant	0.278252	0.248543	2.8601	2.599	3.122	0.133	21.441	0	-0.0512	-0.058	-0.045	0.003	-15.778	0	TRUE
Ingrowing nail	dermatologic	-0.198	-0.856	0.46	0.336	-0.589	0.82037	0.424858	1.58407	26	5525	15	2449	0.555567	0.85149	not_significant	-0.0859903	0.255264	2.8612	2.6	3.123	0.133	21.451	0	-0.0512	-0.058	-0.045	0.003	-15.776	0	TRUE
Inguinal hernia	digestive	-0.5191	-0.91	-0.128	0.2	-2.601	0.595056	0.402524	0.879853	57	5494	52	2412	0.00929749	0.0783739	not_significant	-0.225442	2.03163	2.8466	2.585	3.108	0.134	21.315	0	-0.0507	-0.057	-0.044	0.003	-15.574	0	TRUE
Injuries to the nervous system	injuries & poisonings	-0.5206	-1.396	0.355	0.447	-1.166	0.594164	0.247585	1.42618	12	5539	10	2454	0.243769	0.587763	not_significant	-0.226094	0.613021	2.8626	2.601	3.124	0.133	21.46	0	-0.0512	-0.058	-0.045	0.003	-15.784	0	TRUE
Injury to blood vessels		-0.2954	-1.869	1.278	0.803	-0.368	0.744234	0.154278	3.58945	10	5541	10	2454	0.712942	0.908296	not_significant	-0.128291	0.146946	2.8604	2.599	3.122	0.133	21.445	0	-0.0512	-0.058	-0.045	0.003	-15.775	0	TRUE
Injury to other and unspecified nerves		-1.1403	-2.965	0.685	0.931	-1.224	0.319723	0.0515605	1.98377	10	5541	10	2454	0.220774	0.561075	not_significant	-0.495226	0.656052	2.8609	2.6	3.122	0.133	21.45	0	-0.0512	-0.058	-0.045	0.003	-15.778	0	TRUE
Injury, NOS		-0.5924	-0.783	-0.402	0.097	-6.084	0.552998	0.457033	0.668981	267	5284	212	2252	1.17389e-09	6.38702e-08	con_significant	-0.257276	8.93037	2.8821	2.62	3.144	0.134	21.571	0	-0.0508	-0.057	-0.044	0.003	-15.633	0	TRUE
Insect bite	injuries & poisonings	-0.8803	-1.588	-0.172	0.361	-2.437	0.414658	0.204334	0.841979	15	5536	17	2447	0.0148284	0.11378	not_significant	-0.382309	1.82891	2.8619	2.6	3.123	0.133	21.45	0	-0.0512	-0.058	-0.045	0.003	-15.755	0	TRUE
Insomnia	neurological	-0.4155	-0.641	-0.19	0.115	-3.613	0.66001	0.526765	0.826959	195	5356	146	2318	0.000302813	0.00503426	con_significant	-0.180449	3.51883	2.8463	2.585	3.108	0.133	21.326	0	-0.0504	-0.057	-0.044	0.003	-15.482	0	TRUE
Internal derangement of knee	injuries & poisonings	-0.6161	-0.945	-0.288	0.168	-3.675	0.540047	0.38868	0.749762	81	5470	71	2393	0.000237765	0.00437853	con_significant	-0.267569	3.62385	2.86	2.598	3.121	0.133	21.436	0	-0.0509	-0.057	-0.045	0.003	-15.668	0	TRUE
Intervertebral disc disorder with myelopathy	musculoskeletal	-0.3623	-2.158	1.434	0.916	-0.395	0.696074	0.115556	4.19545	10	5541	10	2454	0.692571	0.908296	not_significant	-0.157345	0.159535	2.8613	2.6	3.123	0.133	21.452	0	-0.0512	-0.058	-0.045	0.003	-15.784	0	TRUE
Intestinal disaccharidase deficiencies and disaccharide malabsorption	endocrine/metabolic	-0.4529	-0.764	-0.142	0.159	-2.852	0.635782	0.465799	0.867621	100	5451	73	2391	0.00434139	0.042343	con_significant	-0.196692	2.36237	2.864	2.602	3.126	0.133	21.461	0	-0.0511	-0.057	-0.045	0.003	-15.716	0	TRUE
Intestinal helminthiases	infectious diseases	0.1009	-2.181	2.383	1.164	0.087	1.10617	0.112929	10.8374	10	5541	10	2454	0.930909	0.978277	not_significant	0.0438203	0.0310926	2.8609	2.6	3.122	0.133	21.449	0	-0.0512	-0.058	-0.045	0.003	-15.784	0	TRUE
Intestinal infection	infectious diseases	-0.5793	-1.078	-0.08	0.255	-2.275	0.56029	0.340275	0.923116	36	5515	30	2434	0.0229324	0.152273	not_significant	-0.251587	1.63955	2.8621	2.601	3.124	0.133	21.452	0	-0.0511	-0.058	-0.045	0.003	-15.747	0	TRUE
Intestinal infection due to C. difficile	infectious diseases	1.2887	-0.292	2.869	0.806	1.598	3.62807	0.746769	17.6194	12	5539	10	2454	0.110017	0.39906	not_significant	0.559675	0.958542	2.8662	2.605	3.128	0.133	21.477	0	-0.0514	-0.058	-0.045	0.003	-15.825	0	TRUE
Intestinal infection due to protozoa	infectious diseases	-2.0515	-4.341	0.238	1.168	-1.756	0.128542	0.0130235	1.26871	10	5541	10	2454	0.0790324	0.336524	not_significant	-0.890955	1.1022	2.8643	2.603	3.126	0.133	21.47	0	-0.0513	-0.058	-0.045	0.003	-15.798	0	TRUE
Intestinal malabsorption (non-celiac)	digestive	0.4878	-0.362	1.338	0.434	1.125	1.62873	0.696282	3.81141	26	5525	10	2454	0.26063	0.604602	not_significant	0.211849	0.583975	2.8591	2.598	3.121	0.133	21.433	0	-0.0512	-0.058	-0.045	0.003	-15.781	0	TRUE
Intracerebral hemorrhage	circulatory system	-0.8663	-2.245	0.513	0.704	-1.231	0.420505	0.105928	1.67029	10	5541	10	2454	0.218253	0.559049	not_significant	-0.376229	0.66104	2.8597	2.598	3.121	0.133	21.435	0	-0.0512	-0.058	-0.045	0.003	-15.76	0	TRUE
Intracranial hemorrhage	circulatory system	0.1148	-2.195	2.425	1.179	0.097	1.12165	0.111359	11.3022	10	5541	10	2454	0.922391	0.976217	not_significant	0.049857	0.0350851	2.861	2.6	3.122	0.133	21.449	0	-0.0512	-0.058	-0.045	0.003	-15.784	0	TRUE
Intracranial hemorrhage (injury)	injuries & poisonings	-0.8371	-3.628	1.954	1.424	-0.588	0.432964	0.0265693	7.05686	10	5541	10	2454	0.556581	0.851726	not_significant	-0.363548	0.254471	2.8615	2.6	3.123	0.133	21.454	0	-0.0512	-0.058	-0.045	0.003	-15.786	0	TRUE
Iron deficiency anemia secondary to blood loss (chronic)	hematopoietic	0.5887	-0.981	2.158	0.801	0.735	1.80164	0.374936	8.65381	10	5541	10	2454	0.462288	0.793771	not_significant	0.255669	0.335087	2.8588	2.597	3.12	0.133	21.426	0	-0.0512	-0.058	-0.045	0.003	-15.768	0	TRUE
Iron deficiency anemias, unspecified or not due to blood loss	hematopoietic	0.5307	-0.001	1.062	0.271	1.957	1.70012	0.999	2.89215	63	5488	20	2444	0.0503642	0.252242	not_significant	0.23048	1.29788	2.8687	2.607	3.13	0.133	21.495	0	-0.0516	-0.058	-0.045	0.003	-15.861	0	TRUE
Irritable Bowel Syndrome	digestive	-0.3312	-0.757	0.095	0.217	-1.525	0.718062	0.469072	1.09966	58	5493	36	2428	0.127374	0.42352	not_significant	-0.143838	0.894918	2.8647	2.603	3.126	0.133	21.473	0	-0.0512	-0.058	-0.045	0.003	-15.781	0	TRUE
Jaundice (not of newborn)	digestive	-0.4496	-1.145	0.246	0.355	-1.267	0.637883	0.318224	1.2789	20	5531	15	2449	0.205213	0.543946	not_significant	-0.195259	0.687796	2.8605	2.599	3.122	0.133	21.448	0	-0.0512	-0.058	-0.045	0.003	-15.763	0	TRUE
Joint effusions	musculoskeletal	-0.3358	-0.738	0.067	0.205	-1.635	0.714766	0.478069	1.0693	64	5487	41	2423	0.101946	0.38617	not_significant	-0.145836	0.991629	2.863	2.602	3.124	0.133	21.468	0	-0.0512	-0.058	-0.045	0.003	-15.766	0	TRUE
Joint/ligament sprain	injuries & poisonings	-1.0499	-1.327	-0.773	0.141	-7.423	0.349973	0.265272	0.461626	96	5455	120	2344	1.14466e-13	1.5224e-11	con_significant	-0.455966	12.9413	2.8862	2.624	3.149	0.134	21.553	0	-0.0511	-0.057	-0.045	0.003	-15.682	0	TRUE
Juvenile osteochondrosis	musculoskeletal	-1.4328	-3.306	0.441	0.956	-1.499	0.23864	0.0366625	1.55426	10	5541	10	2454	0.133859	0.435406	not_significant	-0.622257	0.873352	2.8639	2.602	3.125	0.133	21.473	0	-0.0513	-0.058	-0.045	0.003	-15.8	0	TRUE
Juvenile rheumatoid arthritis	musculoskeletal	-0.2828	-2.695	2.129	1.231	-0.23	0.753671	0.0675424	8.40646	10	5541	10	2454	0.818243	0.953093	not_significant	-0.122818	0.0871175	2.8615	2.6	3.123	0.133	21.453	0	-0.0513	-0.058	-0.045	0.003	-15.786	0	TRUE
Keloid scar	dermatologic	-0.4641	-1.166	0.238	0.358	-1.296	0.628701	0.311611	1.26871	19	5532	14	2450	0.195116	0.527179	not_significant	-0.201556	0.709708	2.8622	2.601	3.124	0.133	21.455	0	-0.0512	-0.058	-0.045	0.003	-15.774	0	TRUE
Keratitis	sense organs	-0.5434	-2.636	1.549	1.068	-0.509	0.58077	0.0716473	4.70676	10	5541	10	2454	0.610806	0.875321	not_significant	-0.235996	0.214097	2.8605	2.599	3.122	0.133	21.442	0	-0.0512	-0.058	-0.045	0.003	-15.774	0	TRUE
Keratoconjunctivitis	sense organs	0.4932	-2.171	3.157	1.359	0.363	1.63755	0.114063	23.5	10	5541	10	2454	0.716708	0.908296	not_significant	0.214194	0.144658	2.8623	2.601	3.124	0.133	21.456	0	-0.0513	-0.058	-0.045	0.003	-15.79	0	TRUE
Keratoconus	sense organs	0.2714	-0.874	1.417	0.584	0.464	1.3118	0.417279	4.12473	12	5539	10	2454	0.642356	0.886863	not_significant	0.117868	0.192224	2.8605	2.599	3.122	0.133	21.446	0	-0.0512	-0.058	-0.045	0.003	-15.784	0	TRUE
Keratoderma, acquired	dermatologic	0.1963	-0.785	1.177	0.501	0.392	1.21689	0.45612	3.24463	14	5537	10	2454	0.695024	0.908296	not_significant	0.085252	0.158	2.8617	2.6	3.123	0.133	21.454	0	-0.0513	-0.058	-0.045	0.003	-15.789	0	TRUE
Kidney replaced by transpant	genitourinary	0.4604	-0.543	1.464	0.512	0.899	1.58471	0.581003	4.32322	20	5531	10	2454	0.368408	0.712995	not_significant	0.199949	0.433671	2.8584	2.597	3.12	0.133	21.422	0	-0.0512	-0.058	-0.045	0.003	-15.769	0	TRUE
Known or suspected fetal abnormality affecting management of mother	pregnancy complications	0.164	-2.104	2.432	1.157	0.142	1.17821	0.121968	11.3816	10	5541	10	2454	0.887276	0.96028	not_significant	0.0712243	0.0519411	2.8609	2.599	3.122	0.133	21.449	0	-0.0512	-0.058	-0.045	0.003	-15.784	0	TRUE
Kyphoscoliosis and scoliosis	musculoskeletal	-0.1876	-0.952	0.577	0.39	-0.481	0.828946	0.385968	1.78069	20	5531	11	2453	0.630736	0.884687	not_significant	-0.0814736	0.200152	2.8613	2.6	3.123	0.133	21.455	0	-0.0512	-0.058	-0.045	0.003	-15.782	0	TRUE
Labyrinthitis	sense organs	-1.5208	-2.87	-0.171	0.689	-2.209	0.218537	0.0566989	0.842822	10	5541	10	2454	0.0271918	0.166064	not_significant	-0.660475	1.56556	2.8552	2.594	3.117	0.133	21.395	0	-0.051	-0.057	-0.045	0.003	-15.71	0	TRUE
Lack of coordination	neurological	-0.5285	-1.39	0.333	0.439	-1.202	0.589489	0.249075	1.39515	12	5539	10	2454	0.229176	0.574227	not_significant	-0.229525	0.639831	2.8603	2.599	3.122	0.133	21.446	0	-0.0512	-0.058	-0.045	0.003	-15.765	0	TRUE
Late effect		-0.101	-1.168	0.966	0.544	-0.186	0.903933	0.310988	2.62741	11	5540	10	2454	0.852742	0.954959	not_significant	-0.0438637	0.0691825	2.8615	2.6	3.123	0.133	21.452	0	-0.0513	-0.058	-0.045	0.003	-15.786	0	TRUE
Late effects of cerebrovascular disease	circulatory system	-0.4552	-1.535	0.625	0.551	-0.826	0.634321	0.215456	1.86825	10	5541	10	2454	0.408694	0.75147	not_significant	-0.197691	0.388602	2.8579	2.596	3.119	0.133	21.416	0	-0.0511	-0.058	-0.045	0.003	-15.74	0	TRUE
Laxity of ligament or hypermobility syndrome	musculoskeletal	-1.2497	-3.076	0.576	0.932	-1.341	0.286591	0.0461435	1.77891	10	5541	10	2454	0.1798	0.512022	not_significant	-0.542738	0.745211	2.8623	2.601	3.124	0.133	21.457	0	-0.0513	-0.058	-0.045	0.003	-15.786	0	TRUE
Learning disorder	mental disorders	-0.1753	-2.393	2.042	1.131	-0.155	0.839205	0.0913552	7.70601	10	5541	10	2454	0.876879	0.958318	not_significant	-0.0761318	0.0570604	2.862	2.6	3.124	0.133	21.439	0	-0.0513	-0.058	-0.045	0.003	-15.779	0	TRUE
Left bundle branch block	circulatory system	-0.9302	-1.865	0.004	0.477	-1.951	0.394475	0.154896	1.00401	10	5541	11	2453	0.0511035	0.254359	not_significant	-0.403981	1.29155	2.8569	2.595	3.118	0.133	21.41	0	-0.0511	-0.057	-0.045	0.003	-15.723	0	TRUE
Lesions of stomach and duodenum	digestive	-0.7602	-3.606	2.086	1.452	-0.523	0.467573	0.0271603	8.05264	10	5541	10	2454	0.600627	0.871455	not_significant	-0.330151	0.221395	2.8611	2.6	3.123	0.133	21.452	0	-0.0512	-0.058	-0.045	0.003	-15.784	0	TRUE
Leukemia	neoplasms	0.7803	-0.462	2.023	0.634	1.231	2.18213	0.630022	7.56097	18	5533	10	2454	0.218446	0.559049	not_significant	0.33888	0.660656	2.8559	2.594	3.117	0.133	21.399	0	-0.0512	-0.058	-0.045	0.003	-15.749	0	TRUE
Leukoplakia of oral mucosa	digestive	-0.6065	-3.453	2.24	1.452	-0.418	0.545256	0.0316505	9.39333	10	5541	10	2454	0.676223	0.904401	not_significant	-0.2634	0.16991	2.8608	2.599	3.122	0.133	21.449	0	-0.0512	-0.058	-0.045	0.003	-15.781	0	TRUE
Lipoma	neoplasms	-0.5765	-1.004	-0.149	0.218	-2.64	0.561861	0.366411	0.861569	48	5503	41	2423	0.00828407	0.0718553	not_significant	-0.250371	2.08176	2.8606	2.599	3.122	0.133	21.433	0	-0.0511	-0.057	-0.045	0.003	-15.714	0	TRUE
Lipoma of skin and subcutaneous tissue	neoplasms	-0.9368	-1.437	-0.436	0.255	-3.667	0.39188	0.23764	0.646618	29	5522	36	2428	0.000245799	0.00445789	con_significant	-0.406847	3.60942	2.8582	2.597	3.12	0.133	21.411	0	-0.051	-0.057	-0.045	0.003	-15.68	0	TRUE
Lipoprotein disorders	endocrine/metabolic	-0.3613	-0.81	0.087	0.229	-1.58	0.69677	0.444858	1.0909	51	5500	33	2431	0.11415	0.405121	not_significant	-0.156911	0.942525	2.8642	2.603	3.126	0.133	21.467	0	-0.0512	-0.058	-0.045	0.003	-15.775	0	TRUE
Liver abscess and sequelae of chronic liver disease	digestive	0.3111	-1.352	1.974	0.849	0.367	1.36493	0.258722	7.19942	10	5541	10	2454	0.713942	0.908296	not_significant	0.135109	0.146337	2.8616	2.6	3.123	0.133	21.454	0	-0.0513	-0.058	-0.045	0.003	-15.788	0	TRUE
Liver replaced by transplant	digestive	-0.8672	-2.498	0.764	0.832	-1.042	0.420126	0.0822493	2.14685	10	5541	10	2454	0.297386	0.648399	not_significant	-0.37662	0.526679	2.8623	2.601	3.124	0.133	21.458	0	-0.0513	-0.058	-0.045	0.003	-15.788	0	TRUE
Localized adiposity	endocrine/metabolic	0.1779	-1.489	1.844	0.85	0.209	1.19471	0.225598	6.32177	10	5541	10	2454	0.834288	0.953959	not_significant	0.077261	0.0786842	2.8611	2.6	3.123	0.133	21.452	0	-0.0513	-0.058	-0.045	0.003	-15.786	0	TRUE
Localized superficial swelling, mass, or lump	dermatologic	-0.4773	-0.889	-0.066	0.21	-2.273	0.620456	0.411067	0.936131	53	5498	44	2420	0.0230551	0.152273	not_significant	-0.207289	1.63723	2.8538	2.592	3.115	0.133	21.391	0	-0.0509	-0.057	-0.045	0.003	-15.665	0	TRUE
Loose body in joint	musculoskeletal	-0.3733	-1.811	1.064	0.734	-0.509	0.688459	0.163491	2.89794	10	5541	10	2454	0.610777	0.875321	not_significant	-0.162122	0.214117	2.862	2.601	3.123	0.133	21.455	0	-0.0513	-0.058	-0.045	0.003	-15.788	0	TRUE
Lumbosacral spondylolysis, congenital		-0.914	-3.76	1.932	1.452	-0.629	0.400917	0.0232837	6.9033	10	5541	10	2454	0.529097	0.843314	not_significant	-0.396945	0.276465	2.8616	2.6	3.123	0.133	21.455	0	-0.0513	-0.058	-0.045	0.003	-15.787	0	TRUE
Lump or mass in breast	genitourinary	-0.5131	-1.591	0.565	0.55	-0.933	0.598637	0.203722	1.75945	10	5541	10	2454	0.350763	0.693989	not_significant	-0.222836	0.454986	2.8619	2.6	3.123	0.133	21.457	0	-0.0512	-0.058	-0.045	0.003	-15.784	0	TRUE
Lymphadenitis	hematopoietic	-0.028	-0.393	0.337	0.186	-0.15	0.972388	0.675029	1.40074	96	5455	46	2418	0.880658	0.958806	not_significant	-0.0121602	0.0551929	2.8612	2.6	3.123	0.133	21.453	0	-0.0512	-0.058	-0.045	0.003	-15.779	0	TRUE
Lymphoid leukemia	neoplasms	0.363	-1.359	2.085	0.879	0.413	1.43764	0.256918	8.04459	10	5541	10	2454	0.679532	0.904986	not_significant	0.157649	0.16779	2.8619	2.6	3.123	0.133	21.455	0	-0.0513	-0.058	-0.045	0.003	-15.79	0	TRUE
Lymphoid leukemia, acute	neoplasms	1.2496	-0.241	2.74	0.761	1.643	3.48895	0.785842	15.487	20	5531	10	2454	0.100392	0.382706	not_significant	0.542694	0.998299	2.8531	2.591	3.115	0.134	21.366	0	-0.0511	-0.057	-0.045	0.003	-15.724	0	TRUE
Lymphoid leukemia, chronic	neoplasms	0.6803	-1.023	2.383	0.869	0.783	1.97447	0.359515	10.8374	10	5541	10	2454	0.433626	0.775604	not_significant	0.295451	0.362885	2.8639	2.602	3.125	0.133	21.462	0	-0.0513	-0.058	-0.045	0.003	-15.801	0	TRUE
Macular degeneration, dry	sense organs	0.9318	-1.506	3.369	1.244	0.749	2.53908	0.221795	29.0495	10	5541	10	2454	0.453668	0.790912	not_significant	0.404676	0.343262	2.8663	2.605	3.128	0.134	21.459	0	-0.0514	-0.058	-0.045	0.003	-15.801	0	TRUE
Macular puckering of retina	sense organs	0.6488	-0.812	2.109	0.745	0.871	1.91324	0.443969	8.24	10	5541	10	2454	0.383935	0.730637	not_significant	0.28177	0.415742	2.8666	2.605	3.128	0.134	21.47	0	-0.0514	-0.058	-0.045	0.003	-15.811	0	TRUE
Major depressive disorder	mental disorders	-0.9591	-1.227	-0.692	0.136	-7.029	0.383238	0.293171	0.500574	108	5443	125	2339	2.08295e-12	2.07774e-10	con_significant	-0.416532	11.6813	2.878	2.616	3.14	0.134	21.509	0	-0.0509	-0.057	-0.045	0.003	-15.632	0	TRUE
Malaise and fatigue	symptoms	-0.2733	-0.449	-0.097	0.09	-3.045	0.760864	0.638266	0.907556	375	5176	228	2236	0.00232974	0.0251649	con_significant	-0.118693	2.63269	2.8637	2.602	3.125	0.133	21.457	0	-0.0508	-0.057	-0.044	0.003	-15.615	0	TRUE
Malignant neoplasm of bladder	neoplasms	-1.1351	-2.604	0.333	0.749	-1.515	0.32139	0.0739771	1.39515	10	5541	10	2454	0.129765	0.429478	not_significant	-0.492968	0.886842	2.8566	2.595	3.118	0.134	21.39	0	-0.0511	-0.057	-0.045	0.003	-15.716	0	TRUE
Malignant neoplasm of kidney, except pelvis	neoplasms	-2.2478	-4.463	-0.032	1.13	-1.988	0.105631	0.0115277	0.968507	10	5541	10	2454	0.0467751	0.2403	not_significant	-0.976207	1.32999	2.8634	2.602	3.125	0.133	21.463	0	-0.0513	-0.058	-0.045	0.003	-15.788	0	TRUE
Malignant neoplasm of liver, primary	neoplasms	-0.1133	-1.899	1.672	0.911	-0.124	0.892883	0.149718	5.3228	10	5541	10	2454	0.901034	0.969036	not_significant	-0.0492056	0.0452589	2.8611	2.6	3.123	0.133	21.452	0	-0.0512	-0.058	-0.045	0.003	-15.785	0	TRUE
Malignant neoplasm of testis	neoplasms	0.6519	-0.041	1.345	0.354	1.843	1.91918	0.959829	3.83819	49	5502	10	2454	0.0653701	0.302116	not_significant	0.283117	1.18462	2.8514	2.59	3.113	0.134	21.354	0	-0.0511	-0.057	-0.045	0.003	-15.727	0	TRUE
Malignant neoplasm of unspecified male genital organ	neoplasms	0.4669	-2.065	2.998	1.292	0.361	1.59504	0.126818	20.0454	10	5541	10	2454	0.717745	0.908296	not_significant	0.202772	0.14403	2.8625	2.601	3.124	0.133	21.45	0	-0.0513	-0.058	-0.045	0.003	-15.787	0	TRUE
Malignant neoplasm, other	neoplasms	0.4821	-0.328	1.292	0.413	1.167	1.61947	0.720363	3.64006	26	5525	10	2454	0.243238	0.587763	not_significant	0.209373	0.613969	2.8628	2.601	3.124	0.133	21.452	0	-0.0513	-0.058	-0.045	0.003	-15.8	0	TRUE
Malunion and nonunion of fracture	musculoskeletal	-0.0957	-1.08	0.889	0.502	-0.191	0.908737	0.339596	2.4327	14	5537	10	2454	0.848856	0.954959	not_significant	-0.041562	0.0711661	2.8617	2.6	3.123	0.133	21.451	0	-0.0513	-0.058	-0.045	0.003	-15.787	0	TRUE
Manlignant and unknown neoplasms of brain and nervous system	neoplasms	0.9013	-0.464	2.266	0.696	1.294	2.4628	0.628764	9.64076	11	5540	10	2454	0.195545	0.527179	not_significant	0.39143	0.708753	2.8665	2.605	3.128	0.133	21.486	0	-0.0514	-0.058	-0.045	0.003	-15.829	0	TRUE
Mastoiditis & related conditions	sense organs	-0.2575	-2.684	2.169	1.238	-0.208	0.772982	0.0682894	8.74953	10	5541	10	2454	0.835212	0.953959	not_significant	-0.111831	0.078203	2.8614	2.6	3.123	0.133	21.453	0	-0.0513	-0.058	-0.045	0.003	-15.786	0	TRUE
Mechanical complication of unspecified genitourinary device, implant, and graft	injuries & poisonings	0.3268	-1.225	1.878	0.792	0.413	1.38652	0.293758	6.54041	10	5541	10	2454	0.679685	0.904986	not_significant	0.141927	0.167693	2.8635	2.602	3.125	0.134	21.45	0	-0.0513	-0.058	-0.045	0.003	-15.787	0	TRUE
Melanomas of skin	neoplasms	-0.8395	-1.905	0.226	0.544	-1.544	0.431926	0.148823	1.25358	10	5541	10	2454	0.122529	0.421795	not_significant	-0.36459	0.91176	2.8537	2.592	3.115	0.133	21.382	0	-0.051	-0.057	-0.045	0.003	-15.698	0	TRUE
Memory loss	mental disorders	-0.2974	-1.098	0.504	0.409	-0.728	0.742747	0.333537	1.65533	15	5536	12	2452	0.466793	0.796424	not_significant	-0.129159	0.330876	2.8581	2.597	3.12	0.133	21.415	0	-0.0511	-0.058	-0.045	0.003	-15.736	0	TRUE
Meniere's disease	sense organs	-0.4079	-1.74	0.925	0.68	-0.6	0.665045	0.17552	2.52187	10	5541	10	2454	0.548501	0.849983	not_significant	-0.177149	0.260822	2.8604	2.599	3.122	0.133	21.446	0	-0.0512	-0.058	-0.045	0.003	-15.774	0	TRUE
Meningitis	neurological	0.7503	-0.784	2.285	0.783	0.958	2.11764	0.456576	9.82569	10	5541	10	2454	0.337928	0.685553	not_significant	0.325851	0.471176	2.8598	2.598	3.121	0.133	21.438	0	-0.0512	-0.058	-0.045	0.003	-15.78	0	TRUE
Methicillin resistant Staphylococcus aureus	infectious diseases	-0.4837	-1.695	0.728	0.618	-0.783	0.616498	0.183599	2.07093	10	5541	10	2454	0.433819	0.775604	not_significant	-0.210068	0.362691	2.8604	2.599	3.122	0.133	21.445	0	-0.0512	-0.058	-0.045	0.003	-15.772	0	TRUE
Methicillin sensitive Staphylococcus aureus	infectious diseases	-0.1095	-0.927	0.708	0.417	-0.263	0.896282	0.395739	2.02993	18	5533	10	2454	0.792834	0.944833	not_significant	-0.0475552	0.100818	2.8614	2.6	3.123	0.133	21.453	0	-0.0512	-0.058	-0.045	0.003	-15.785	0	TRUE
Microscopic hematuria	genitourinary	-0.1383	-0.736	0.459	0.305	-0.454	0.870837	0.479026	1.58249	30	5521	19	2445	0.650091	0.893075	not_significant	-0.0600629	0.187026	2.8594	2.598	3.121	0.133	21.429	0	-0.0512	-0.058	-0.045	0.003	-15.749	0	TRUE
Migrain with aura	neurological	-0.6289	-1.205	-0.053	0.294	-2.139	0.533178	0.299692	0.94838	28	5523	21	2443	0.0324746	0.188699	not_significant	-0.273128	1.48846	2.8709	2.609	3.133	0.134	21.503	0	-0.0514	-0.058	-0.045	0.003	-15.82	0	TRUE
Migraine	neurological	-0.5928	-0.891	-0.294	0.152	-3.892	0.552777	0.410245	0.745276	102	5449	84	2380	9.94899e-05	0.00195229	con_significant	-0.25745	4.00222	2.8676	2.606	3.129	0.133	21.481	0	-0.051	-0.057	-0.045	0.003	-15.707	0	TRUE
Mineral deficiency NEC	endocrine/metabolic	0.8926	-0.616	2.402	0.77	1.159	2.44147	0.540101	11.0452	12	5539	10	2454	0.246282	0.587763	not_significant	0.387651	0.608567	2.8583	2.597	3.12	0.133	21.429	0	-0.0512	-0.058	-0.045	0.003	-15.773	0	TRUE
Miscarriage; stillbirth	pregnancy complications	1.3781	-0.816	3.572	1.119	1.231	3.96736	0.442197	35.5877	10	5541	10	2454	0.218236	0.559049	not_significant	0.598501	0.661073	2.8613	2.6	3.123	0.133	21.449	0	-0.0513	-0.058	-0.045	0.003	-15.791	0	TRUE
Mitral valve disease	circulatory system	-0.4407	-2.328	1.446	0.963	-0.458	0.643586	0.0974905	4.2461	10	5541	10	2454	0.647139	0.892204	not_significant	-0.191394	0.189002	2.8584	2.597	3.12	0.134	21.409	0	-0.0512	-0.058	-0.045	0.003	-15.741	0	TRUE
Mixed hyperlipidemia	endocrine/metabolic	-0.2345	-0.534	0.065	0.153	-1.533	0.790966	0.586255	1.06716	116	5435	78	2386	0.125263	0.421803	not_significant	-0.101842	0.902177	2.8519	2.59	3.114	0.134	21.357	0	-0.0509	-0.057	-0.044	0.003	-15.619	0	TRUE
Mobitz II AV block		-1.4062	-3.813	1.001	1.228	-1.145	0.245073	0.0220818	2.721	10	5541	10	2454	0.252209	0.595453	not_significant	-0.610705	0.598239	2.861	2.6	3.122	0.133	21.45	0	-0.0512	-0.058	-0.045	0.003	-15.779	0	TRUE
Mood disorders	mental disorders	-0.5013	-1.26	0.257	0.387	-1.295	0.605743	0.283654	1.29305	16	5535	13	2451	0.195256	0.527179	not_significant	-0.217712	0.709396	2.86	2.599	3.121	0.133	21.441	0	-0.0512	-0.058	-0.045	0.003	-15.758	0	TRUE
Morbid obesity	endocrine/metabolic	-0.409	-0.797	-0.021	0.198	-2.067	0.664314	0.450679	0.979219	66	5485	46	2418	0.0387152	0.213558	not_significant	-0.177626	1.41212	2.863	2.602	3.124	0.133	21.46	0	-0.0511	-0.058	-0.045	0.003	-15.748	0	TRUE
Moyamoya disease	circulatory system	-0.8884	-3.661	1.884	1.415	-0.628	0.411313	0.0257068	6.57977	10	5541	10	2454	0.529982	0.843601	not_significant	-0.385827	0.275739	2.8617	2.6	3.123	0.133	21.455	0	-0.0513	-0.058	-0.045	0.003	-15.787	0	TRUE
Multiple myeloma	neoplasms	0.1114	-2.664	2.887	1.416	0.079	1.11784	0.069669	17.9394	10	5541	10	2454	0.937295	0.980823	not_significant	0.0483804	0.0281235	2.8615	2.6	3.123	0.133	21.44	0	-0.0513	-0.058	-0.045	0.003	-15.775	0	TRUE
Multiple sclerosis	neurological	-1.2237	-2.268	-0.18	0.533	-2.297	0.29414	0.103519	0.83527	10	5541	10	2454	0.0216196	0.148728	not_significant	-0.531446	1.66515	2.864	2.603	3.126	0.133	21.467	0	-0.0513	-0.058	-0.045	0.003	-15.784	0	TRUE
Muscle weakness	symptoms	0.0046	-0.572	0.582	0.294	0.016	1.00461	0.564396	1.78961	37	5514	18	2446	0.987471	0.997615	not_significant	0.00199775	0.00547581	2.8611	2.6	3.123	0.133	21.452	0	-0.0512	-0.058	-0.045	0.003	-15.782	0	TRUE
Muscle/tendon sprain		-0.3065	-1.257	0.644	0.485	-0.632	0.736019	0.284506	1.90408	10	5541	10	2454	0.527338	0.841631	not_significant	-0.133111	0.277911	2.8589	2.597	3.12	0.133	21.429	0	-0.0512	-0.058	-0.045	0.003	-15.753	0	TRUE
Muscular calcification and ossification	musculoskeletal	-0.5534	-2.379	1.272	0.931	-0.594	0.574992	0.0926432	3.56798	10	5541	10	2454	0.552401	0.849983	not_significant	-0.240339	0.257745	2.8621	2.601	3.124	0.133	21.458	0	-0.0513	-0.058	-0.045	0.003	-15.79	0	TRUE
Muscular dystrophies	neurological	-1.0114	-3.018	0.996	1.024	-0.988	0.363709	0.0488989	2.70743	10	5541	10	2454	0.32333	0.675844	not_significant	-0.439245	0.490354	2.8629	2.601	3.124	0.133	21.463	0	-0.0513	-0.058	-0.045	0.003	-15.795	0	TRUE
Muscular wasting and disuse atrophy	symptoms	-0.6342	-2.21	0.941	0.804	-0.789	0.53036	0.109701	2.56254	10	5541	10	2454	0.430196	0.775604	not_significant	-0.27543	0.366333	2.862	2.601	3.123	0.133	21.46	0	-0.0513	-0.058	-0.045	0.003	-15.79	0	TRUE
Musculoskeletal symptoms referable to limbs	symptoms	-0.3673	-0.863	0.129	0.253	-1.451	0.692602	0.421894	1.13769	40	5511	28	2436	0.14678	0.455877	not_significant	-0.159516	0.833332	2.8601	2.599	3.122	0.133	21.443	0	-0.0511	-0.058	-0.045	0.003	-15.748	0	TRUE
Myalgia and myositis unspecified	symptoms	0.2163	-0.214	0.647	0.22	0.985	1.24147	0.807348	1.9098	79	5472	30	2434	0.324703	0.675844	not_significant	0.0939379	0.488514	2.8608	2.599	3.122	0.133	21.444	0	-0.0513	-0.058	-0.045	0.003	-15.797	0	TRUE
Mycoses	infectious diseases	0.09	-1.12	1.3	0.618	0.146	1.09417	0.32628	3.6693	10	5541	10	2454	0.884083	0.959426	not_significant	0.0390865	0.0535072	2.8611	2.6	3.122	0.133	21.45	0	-0.0512	-0.058	-0.045	0.003	-15.785	0	TRUE
Myeloid leukemia, acute	neoplasms	1.7401	-0.3	3.781	1.041	1.671	5.69791	0.740818	43.8599	15	5536	10	2454	0.0946474	0.37373	not_significant	0.755716	1.02389	2.8557	2.594	3.117	0.133	21.394	0	-0.0512	-0.058	-0.045	0.003	-15.747	0	TRUE
Myeloproliferative disease	neoplasms	1.0262	0.198	1.855	0.423	2.427	2.79044	1.21896	6.3917	40	5511	10	2454	0.0152161	0.114552	not_significant	0.445673	1.8177	2.8643	2.602	3.126	0.134	21.431	0	-0.0514	-0.058	-0.045	0.003	-15.808	0	TRUE
Myocardial infarction	circulatory system	-0.4878	-1.299	0.323	0.414	-1.179	0.613976	0.272804	1.38127	12	5539	15	2449	0.238395	0.583734	not_significant	-0.211849	0.622703	2.8504	2.588	3.113	0.134	21.306	0	-0.0509	-0.057	-0.045	0.003	-15.626	0	TRUE
Myocarditis	circulatory system	-1.0222	-2.59	0.545	0.8	-1.278	0.359803	0.07502	1.72461	10	5541	10	2454	0.201159	0.535084	not_significant	-0.443936	0.69646	2.8617	2.6	3.123	0.133	21.44	0	-0.0512	-0.058	-0.045	0.003	-15.77	0	TRUE
Myoclonus	neurological	-1.3251	-3.127	0.477	0.919	-1.441	0.265776	0.0438491	1.61123	10	5541	10	2454	0.149479	0.46018	not_significant	-0.575484	0.82542	2.8635	2.602	3.125	0.133	21.465	0	-0.0513	-0.058	-0.045	0.003	-15.794	0	TRUE
Myopathy	neurological	-0.2606	-1.573	1.051	0.669	-0.389	0.770589	0.207422	2.86051	10	5541	10	2454	0.697083	0.908296	not_significant	-0.113177	0.156716	2.8606	2.599	3.122	0.133	21.449	0	-0.0512	-0.058	-0.045	0.003	-15.778	0	TRUE
Myopia	sense organs	-0.4467	-0.699	-0.194	0.129	-3.468	0.639736	0.497082	0.823658	164	5387	107	2357	0.000523492	0.00793189	con_significant	-0.193999	3.28109	2.8872	2.625	3.149	0.134	21.585	0	-0.0515	-0.058	-0.045	0.003	-15.844	0	TRUE
Nasal polyps	respiratory	-0.6474	-1.271	-0.024	0.318	-2.036	0.523405	0.280551	0.976286	21	5530	21	2443	0.041717	0.225951	not_significant	-0.281162	1.37969	2.8559	2.594	3.117	0.133	21.408	0	-0.051	-0.057	-0.045	0.003	-15.707	0	TRUE
Nausea and vomiting	symptoms	-0.0858	-0.348	0.176	0.134	-0.643	0.917778	0.706099	1.19244	191	5360	91	2373	0.520448	0.840258	not_significant	-0.0372625	0.283623	2.8641	2.603	3.126	0.133	21.462	0	-0.0512	-0.058	-0.045	0.003	-15.786	0	TRUE
Neoplasm of uncertain behavior	neoplasms	-0.1143	-0.492	0.263	0.192	-0.594	0.89199	0.611402	1.30083	84	5467	45	2419	0.552366	0.849983	not_significant	-0.0496399	0.257773	2.8607	2.599	3.122	0.133	21.451	0	-0.0512	-0.058	-0.045	0.003	-15.763	0	TRUE
Neoplasm of uncertain behavior of male genital organs	neoplasms	-0.1451	-1.629	1.339	0.757	-0.192	0.864936	0.196126	3.81523	10	5541	10	2454	0.84796	0.954959	not_significant	-0.0630161	0.0716247	2.8609	2.6	3.122	0.133	21.45	0	-0.0512	-0.058	-0.045	0.003	-15.781	0	TRUE
Neoplasm of uncertain behavior of skin	neoplasms	-0.8579	-1.123	-0.593	0.135	-6.346	0.424052	0.325302	0.552667	112	5439	125	2339	2.20487e-10	1.46624e-08	con_significant	-0.372581	9.65662	2.8528	2.591	3.115	0.134	21.341	0	-0.0503	-0.057	-0.044	0.003	-15.458	0	TRUE
Neoplasm of unspecified nature of digestive system	neoplasms	0.3188	-0.939	1.576	0.642	0.497	1.37548	0.391019	4.83557	10	5541	10	2454	0.619229	0.879261	not_significant	0.138453	0.208149	2.8635	2.602	3.125	0.133	21.456	0	-0.0513	-0.058	-0.045	0.003	-15.792	0	TRUE
Nephritis and nephropathy in diseases classified elsewhere	genitourinary	1.6827	-0.442	3.807	1.084	1.553	5.38006	0.64275	45.0152	10	5541	10	2454	0.120537	0.419639	not_significant	0.730787	0.918878	2.8701	2.608	3.132	0.134	21.491	0	-0.0515	-0.058	-0.045	0.003	-15.84	0	TRUE
Nephritis and nephropathy with pathological lesion	genitourinary	0.1358	-0.839	1.11	0.497	0.273	1.14545	0.432142	3.03436	15	5536	10	2454	0.7847	0.93774	not_significant	0.0589772	0.105297	2.8609	2.6	3.122	0.133	21.45	0	-0.0513	-0.058	-0.045	0.003	-15.786	0	TRUE
Nephrotic syndrome without mention of glomerulonephritis	genitourinary	0.5754	-0.974	2.125	0.791	0.728	1.77784	0.37757	8.3729	10	5541	10	2454	0.466746	0.796424	not_significant	0.249893	0.330919	2.8595	2.598	3.121	0.133	21.436	0	-0.0512	-0.058	-0.045	0.003	-15.776	0	TRUE
Nerve plexus lesions	neurological	-0.4731	-1.525	0.579	0.537	-0.881	0.623068	0.217621	1.78425	10	5541	10	2454	0.378077	0.722937	not_significant	-0.205465	0.422419	2.8628	2.601	3.124	0.133	21.462	0	-0.0513	-0.058	-0.045	0.003	-15.791	0	TRUE
Nerve root and plexus disorders	neurological	0.0952	-1.748	1.938	0.94	0.101	1.09988	0.174122	6.94485	10	5541	10	2454	0.91932	0.976065	not_significant	0.0413448	0.0365334	2.8615	2.6	3.123	0.133	21.445	0	-0.0513	-0.058	-0.045	0.003	-15.779	0	TRUE
Nervous system congenital anomalies	congenital anomalies	-0.8628	-3.635	1.909	1.414	-0.61	0.421979	0.0263839	6.74634	10	5541	10	2454	0.541886	0.846872	not_significant	-0.374709	0.266092	2.8616	2.6	3.123	0.133	21.454	0	-0.0513	-0.058	-0.045	0.003	-15.786	0	TRUE
Neural tube defects	congenital anomalies	-1.4272	-4.408	1.554	1.521	-0.938	0.23998	0.0121795	4.73035	10	5541	10	2454	0.348046	0.693197	not_significant	-0.619825	0.458363	2.8636	2.602	3.125	0.133	21.469	0	-0.0513	-0.058	-0.045	0.003	-15.802	0	TRUE
Neuralgia, neuritis, and radiculitis NOS	symptoms	-0.3229	-0.789	0.144	0.238	-1.357	0.724046	0.454299	1.15488	46	5505	31	2433	0.174791	0.50174	not_significant	-0.140234	0.75748	2.86	2.599	3.121	0.133	21.443	0	-0.0511	-0.058	-0.045	0.003	-15.746	0	TRUE
Neuroendocrine tumors	neoplasms	0.2162	-1.503	1.936	0.877	0.246	1.24135	0.222462	6.93097	10	5541	10	2454	0.805349	0.947888	not_significant	0.0938945	0.0940161	2.8617	2.6	3.123	0.133	21.452	0	-0.0513	-0.058	-0.045	0.003	-15.786	0	TRUE
Neurological disorders	mental disorders	-0.7035	-1.326	-0.081	0.317	-2.217	0.49485	0.265537	0.922194	23	5528	20	2444	0.0266436	0.164394	not_significant	-0.305526	1.57441	2.8665	2.605	3.128	0.134	21.47	0	-0.0513	-0.058	-0.045	0.003	-15.782	0	TRUE
Neutropenia	hematopoietic	1.4545	0.656	2.253	0.408	3.569	4.28234	1.92707	9.51624	64	5487	10	2454	0.000357987	0.00579068	mi_significant	0.631681	3.44613	2.861	2.599	3.123	0.134	21.37	0	-0.0515	-0.058	-0.045	0.003	-15.788	0	TRUE
Nevus, non-neoplastic	neoplasms	-0.9269	-1.218	-0.636	0.148	-6.25	0.395779	0.295821	0.529406	90	5461	104	2360	4.10367e-10	2.45604e-08	con_significant	-0.402548	9.38683	2.8687	2.607	3.131	0.134	21.454	0	-0.0508	-0.057	-0.044	0.003	-15.612	0	TRUE
Nodular lymphoma	neoplasms	0.4114	-1.293	2.116	0.869	0.473	1.50893	0.274446	8.29788	10	5541	10	2454	0.636092	0.884729	not_significant	0.178669	0.19648	2.8622	2.601	3.124	0.133	21.457	0	-0.0513	-0.058	-0.045	0.003	-15.792	0	TRUE
Non-autoimmune hemolytic anemias	hematopoietic	-1.3246	-4.156	1.507	1.445	-0.917	0.265909	0.0156701	4.51317	10	5541	10	2454	0.359196	0.702546	not_significant	-0.575266	0.444668	2.8637	2.602	3.125	0.133	21.465	0	-0.0513	-0.058	-0.045	0.003	-15.799	0	TRUE
Non-healing surgical wound		0.5736	-1.941	3.088	1.283	0.447	1.77464	0.14356	21.9332	10	5541	10	2454	0.654821	0.894826	not_significant	0.249111	0.183877	2.863	2.601	3.124	0.133	21.455	0	-0.0513	-0.058	-0.045	0.003	-15.791	0	TRUE
Non-Hodgkins lymphoma	neoplasms	0.5991	-0.114	1.312	0.364	1.646	1.82048	0.892258	3.71359	42	5509	10	2454	0.0997855	0.382706	not_significant	0.260186	1.00093	2.8581	2.596	3.12	0.133	21.409	0	-0.0513	-0.058	-0.045	0.003	-15.772	0	TRUE
Nonallopathic lesions NEC	symptoms	-0.4147	-1.217	0.388	0.41	-1.013	0.660538	0.296117	1.47403	14	5537	11	2453	0.311172	0.663944	not_significant	-0.180102	0.507	2.8595	2.598	3.121	0.133	21.439	0	-0.0512	-0.058	-0.045	0.003	-15.759	0	TRUE
Noninfectious dermatoses of eyelid	sense organs	-1.1212	-2.454	0.212	0.68	-1.649	0.325888	0.0859491	1.23615	10	5541	10	2454	0.0992095	0.382092	not_significant	-0.486931	1.00345	2.8641	2.603	3.126	0.133	21.469	0	-0.0513	-0.058	-0.045	0.003	-15.795	0	TRUE
Noninfectious disorders of lymphatic channels	circulatory system	0.0588	-1.305	1.422	0.696	0.085	1.06056	0.271173	4.1454	10	5541	10	2454	0.932635	0.978408	not_significant	0.0255365	0.0302883	2.8611	2.6	3.122	0.133	21.451	0	-0.0512	-0.058	-0.045	0.003	-15.785	0	TRUE
Noninfectious gastroenteritis	digestive	-0.3071	-0.665	0.05	0.182	-1.684	0.735577	0.514274	1.05127	83	5468	53	2411	0.0922586	0.37131	not_significant	-0.133372	1.03499	2.8611	2.6	3.123	0.133	21.455	0	-0.0511	-0.057	-0.045	0.003	-15.742	0	TRUE
Nonrheumatic aortic valve disorders	circulatory system	-0.6846	-1.428	0.059	0.379	-1.805	0.504292	0.239788	1.06078	13	5538	18	2446	0.0710332	0.314914	not_significant	-0.297318	1.14854	2.8456	2.584	3.108	0.134	21.29	0	-0.0508	-0.057	-0.044	0.003	-15.594	0	TRUE
Nonrheumatic mitral valve disorders	circulatory system	-0.4331	-0.977	0.111	0.278	-1.561	0.648496	0.376439	1.11739	30	5521	27	2437	0.118618	0.415948	not_significant	-0.188093	0.925848	2.8514	2.59	3.113	0.134	21.354	0	-0.0509	-0.057	-0.045	0.003	-15.651	0	TRUE
Nonrheumatic pulmonary valve disorders	circulatory system	-1.2053	-2.677	0.266	0.751	-1.606	0.299602	0.0687692	1.30474	10	5541	10	2454	0.108366	0.397339	not_significant	-0.523455	0.965108	2.86	2.599	3.121	0.133	21.442	0	-0.0512	-0.058	-0.045	0.003	-15.764	0	TRUE
Nonrheumatic tricuspid valve disorders	circulatory system	0.1711	-1.647	1.989	0.928	0.184	1.18661	0.192627	7.30822	10	5541	10	2454	0.853639	0.954959	not_significant	0.0743078	0.0687258	2.8615	2.6	3.123	0.133	21.452	0	-0.0513	-0.058	-0.045	0.003	-15.786	0	TRUE
Nonspecific abnormal findings in cerebrospinal fluid	neurological	-1.0166	-3.834	1.801	1.437	-0.707	0.361823	0.021623	6.0557	10	5541	10	2454	0.47939	0.80481	not_significant	-0.441504	0.319311	2.8621	2.601	3.124	0.133	21.458	0	-0.0513	-0.058	-0.045	0.003	-15.79	0	TRUE
Nonspecific abnormal findings in stool contents	digestive	-0.2713	-0.826	0.284	0.283	-0.958	0.762388	0.437797	1.32843	35	5516	21	2443	0.337935	0.685553	not_significant	-0.117824	0.471167	2.8624	2.601	3.124	0.133	21.456	0	-0.0512	-0.058	-0.045	0.003	-15.777	0	TRUE
Nonspecific abnormal findings on radiological and other examination of biliary tract	digestive	-0.3817	-1.673	0.909	0.659	-0.58	0.6827	0.187683	2.48184	10	5541	10	2454	0.562231	0.855135	not_significant	-0.16577	0.250085	2.8613	2.6	3.123	0.133	21.455	0	-0.0512	-0.058	-0.045	0.003	-15.784	0	TRUE
Nonspecific abnormal findings on radiological and other examination of musculoskeletal system	symptoms	-0.3121	-0.974	0.35	0.338	-0.924	0.731908	0.37757	1.41907	23	5528	16	2448	0.355383	0.699661	not_significant	-0.135543	0.449303	2.8594	2.598	3.121	0.133	21.439	0	-0.0512	-0.058	-0.045	0.003	-15.755	0	TRUE
Nonspecific abnormal findings on radiological and other examination of other intrathoracic organs (echocardiogram, etc)	symptoms	-0.1832	-0.726	0.36	0.277	-0.662	0.832602	0.48384	1.43333	37	5514	23	2441	0.508245	0.829972	not_significant	-0.0795627	0.293927	2.8593	2.598	3.121	0.133	21.435	0	-0.0512	-0.058	-0.045	0.003	-15.75	0	TRUE
Nonspecific abnormal findings on radiological and other examination of skull and head	neurological	-0.2095	-0.911	0.492	0.358	-0.585	0.81099	0.402122	1.63558	22	5529	14	2450	0.558504	0.852716	not_significant	-0.0909847	0.252974	2.8602	2.599	3.122	0.133	21.44	0	-0.0512	-0.058	-0.045	0.003	-15.764	0	TRUE
Nonspecific abnormal results of function study of brain and central nervous system	neurological	-0.7291	-2.55	1.092	0.929	-0.785	0.482343	0.0780817	2.98023	10	5541	10	2454	0.432604	0.775604	not_significant	-0.316644	0.36391	2.8635	2.602	3.125	0.133	21.463	0	-0.0513	-0.058	-0.045	0.003	-15.797	0	TRUE
Nonspecific chest pain	circulatory system	-0.3249	-0.504	-0.146	0.091	-3.553	0.7226	0.604109	0.864158	342	5209	228	2236	0.00038101	0.00608093	con_significant	-0.141102	3.41906	2.8486	2.587	3.11	0.133	21.346	0	-0.0503	-0.057	-0.044	0.003	-15.449	0	TRUE
Nonspecific elevation of levels of transaminase or lactic acid dehydrogenase [LDH]	digestive	-0.654	-1.099	-0.209	0.227	-2.879	0.519962	0.333204	0.811395	44	5507	38	2426	0.00399533	0.0395241	con_significant	-0.284029	2.39845	2.8668	2.605	3.128	0.133	21.476	0	-0.0512	-0.058	-0.045	0.003	-15.762	0	TRUE
Nonspecific findings on examination of blood	symptoms	-0.5163	-1.032	0	0.263	-1.961	0.596724	0.356294	1	33	5518	28	2436	0.0498985	0.252019	not_significant	-0.224226	1.30191	2.8573	2.596	3.119	0.133	21.421	0	-0.051	-0.057	-0.045	0.003	-15.715	0	TRUE
Nontoxic multinodular goiter	endocrine/metabolic	-0.4399	-1.357	0.477	0.468	-0.94	0.644101	0.257432	1.61123	11	5540	10	2454	0.347075	0.693183	not_significant	-0.191046	0.459576	2.8597	2.598	3.121	0.133	21.435	0	-0.0512	-0.058	-0.045	0.003	-15.758	0	TRUE
Nontoxic nodular goiter	endocrine/metabolic	0.3208	-1.058	1.7	0.704	0.456	1.37823	0.347149	5.47395	10	5541	10	2454	0.648449	0.892204	not_significant	0.139322	0.188124	2.8616	2.6	3.123	0.133	21.454	0	-0.0513	-0.058	-0.045	0.003	-15.79	0	TRUE
Nontoxic uninodular goiter	endocrine/metabolic	0.1332	-0.521	0.787	0.334	0.399	1.14248	0.593926	2.1968	31	5520	14	2450	0.689751	0.907807	not_significant	0.057848	0.161308	2.8619	2.6	3.123	0.133	21.454	0	-0.0513	-0.058	-0.045	0.003	-15.789	0	TRUE
Nystagmus and other irregular eye movements	sense organs	-0.0252	-1.638	1.587	0.823	-0.031	0.975115	0.194368	4.88906	10	5541	10	2454	0.97557	0.99332	not_significant	-0.0109442	0.0107415	2.8612	2.6	3.123	0.133	21.444	0	-0.0512	-0.058	-0.045	0.003	-15.781	0	TRUE
Obesity	endocrine/metabolic	-0.3638	-0.592	-0.136	0.116	-3.127	0.69503	0.55322	0.872843	202	5349	136	2328	0.00176512	0.0207142	con_significant	-0.157996	2.75323	2.8619	2.6	3.123	0.133	21.441	0	-0.0509	-0.057	-0.044	0.003	-15.645	0	TRUE
Obsessive-compulsive disorders	mental disorders	0.0082	-0.865	0.882	0.446	0.018	1.00823	0.421052	2.41573	15	5536	10	2454	0.985352	0.997615	not_significant	0.00356121	0.0064087	2.8612	2.6	3.123	0.133	21.449	0	-0.0512	-0.058	-0.045	0.003	-15.78	0	TRUE
Obstruction of bile duct	digestive	0.0962	-1.659	1.851	0.895	0.107	1.10098	0.190329	6.36618	10	5541	10	2454	0.91441	0.972933	not_significant	0.0417791	0.0388589	2.8613	2.6	3.123	0.133	21.451	0	-0.0513	-0.058	-0.045	0.003	-15.784	0	TRUE
Obstructive chronic bronchitis	respiratory	1.3137	-0.965	3.592	1.162	1.13	3.71991	0.380983	36.3066	10	5541	10	2454	0.25845	0.60305	not_significant	0.570533	0.587623	2.8634	2.602	3.125	0.133	21.468	0	-0.0513	-0.058	-0.045	0.003	-15.807	0	TRUE
Obstructive sleep apnea	neurological	-0.5281	-0.708	-0.348	0.092	-5.762	0.589724	0.492628	0.706099	303	5248	245	2219	8.31444e-09	3.68607e-07	con_significant	-0.229351	8.08017	2.8396	2.578	3.102	0.134	21.243	0	-0.0497	-0.056	-0.043	0.003	-15.242	0	TRUE
Occlusion and stenosis of precerebral arteries	circulatory system	-0.252	-1.388	0.884	0.579	-0.435	0.777245	0.249574	2.42056	10	5541	10	2454	0.663652	0.897618	not_significant	-0.109442	0.178059	2.8591	2.598	3.121	0.133	21.424	0	-0.0512	-0.058	-0.045	0.003	-15.752	0	TRUE
Occlusion of cerebral arteries, with cerebral infarction	circulatory system	0.9832	-1.268	3.235	1.149	0.856	2.673	0.281394	25.4064	10	5541	10	2454	0.392047	0.737861	not_significant	0.426998	0.406662	2.864	2.602	3.126	0.133	21.46	0	-0.0513	-0.058	-0.045	0.003	-15.8	0	TRUE
Oliguria and anuria	genitourinary	0.8068	-2.055	3.669	1.46	0.553	2.24073	0.128093	39.2127	10	5541	10	2454	0.580575	0.863914	not_significant	0.350389	0.236142	2.8656	2.604	3.127	0.134	21.446	0	-0.0514	-0.058	-0.045	0.003	-15.789	0	TRUE
Open wound of ear	injuries & poisonings	-0.586	-3.028	1.856	1.246	-0.47	0.556549	0.0484124	6.39809	10	5541	10	2454	0.638158	0.885289	not_significant	-0.254497	0.195072	2.8626	2.601	3.124	0.133	21.457	0	-0.0513	-0.058	-0.045	0.003	-15.791	0	TRUE
Open wound of finger(s)	injuries & poisonings	-0.393	-0.906	0.12	0.262	-1.5	0.675029	0.404138	1.1275	37	5514	26	2438	0.133597	0.435406	not_significant	-0.170678	0.874203	2.8611	2.6	3.123	0.133	21.452	0	-0.0512	-0.058	-0.045	0.003	-15.758	0	TRUE
Open wound of foot except toe(s) alone	injuries & poisonings	-1.2787	-2.417	-0.14	0.581	-2.201	0.278399	0.0891888	0.869358	10	5541	10	2454	0.0277573	0.167806	not_significant	-0.555332	1.55662	2.863	2.602	3.125	0.133	21.461	0	-0.0512	-0.058	-0.045	0.003	-15.779	0	TRUE
Open wound of genital organs	injuries & poisonings	0.3656	-1.939	2.67	1.176	0.311	1.44138	0.143848	14.44	10	5541	10	2454	0.755836	0.920382	not_significant	0.158778	0.121573	2.8611	2.6	3.123	0.133	21.452	0	-0.0513	-0.058	-0.045	0.003	-15.786	0	TRUE
Open wound of hand except finger(s)	injuries & poisonings	-0.9003	-1.56	-0.24	0.337	-2.674	0.406448	0.210136	0.786628	18	5533	19	2445	0.00750605	0.0660643	not_significant	-0.390995	2.12459	2.8669	2.605	3.128	0.133	21.487	0	-0.0513	-0.058	-0.045	0.003	-15.792	0	TRUE
Open wound of lip and mouth	injuries & poisonings	-1.6268	-4.054	0.8	1.238	-1.314	0.196558	0.0173528	2.22554	10	5541	10	2454	0.188952	0.526605	not_significant	-0.70651	0.723649	2.8629	2.601	3.124	0.133	21.461	0	-0.0513	-0.058	-0.045	0.003	-15.792	0	TRUE
Open wound of nose and sinus	injuries & poisonings	-0.4168	-2.239	1.405	0.93	-0.448	0.659153	0.106565	4.07553	10	5541	10	2454	0.653846	0.894826	not_significant	-0.181014	0.184525	2.8614	2.6	3.123	0.133	21.454	0	-0.0512	-0.058	-0.045	0.003	-15.786	0	TRUE
Open wound of toe(s)	injuries & poisonings	-1.1925	-2.355	-0.03	0.593	-2.011	0.303462	0.0948935	0.970446	10	5541	10	2454	0.0443636	0.232909	not_significant	-0.517896	1.35297	2.8643	2.603	3.126	0.133	21.469	0	-0.0513	-0.058	-0.045	0.003	-15.791	0	TRUE
Open wound or laceration of eye or eyelid	injuries & poisonings	-0.5258	-2.356	1.305	0.934	-0.563	0.591082	0.0947987	3.68769	10	5541	10	2454	0.573516	0.858101	not_significant	-0.228352	0.241455	2.862	2.601	3.123	0.133	21.456	0	-0.0513	-0.058	-0.045	0.003	-15.789	0	TRUE
Open wounds of extremities	injuries & poisonings	-0.7831	-1.369	-0.197	0.299	-2.621	0.456987	0.254361	0.821191	23	5528	25	2439	0.00877928	0.0750629	not_significant	-0.340096	2.05654	2.8574	2.596	3.119	0.133	21.414	0	-0.051	-0.057	-0.045	0.003	-15.706	0	TRUE
Open wounds of head; neck; and trunk	injuries & poisonings	0.2455	-0.528	1.019	0.395	0.622	1.27826	0.589783	2.77042	26	5525	10	2454	0.534095	0.843861	not_significant	0.106619	0.272381	2.8599	2.598	3.121	0.133	21.443	0	-0.0512	-0.058	-0.045	0.003	-15.785	0	TRUE
Optic atrophy	sense organs	-0.6314	-1.448	0.186	0.417	-1.515	0.531847	0.23504	1.20442	13	5538	11	2453	0.129884	0.429478	not_significant	-0.274214	0.886445	2.8628	2.601	3.124	0.133	21.46	0	-0.0512	-0.058	-0.045	0.003	-15.78	0	TRUE
Optic neuritis/neuropathy	sense organs	0.2908	-1.333	1.915	0.829	0.351	1.3375	0.263685	6.78694	10	5541	10	2454	0.725599	0.908296	not_significant	0.126293	0.139304	2.8608	2.599	3.122	0.133	21.45	0	-0.0512	-0.058	-0.045	0.003	-15.785	0	TRUE
Oral aphthae	digestive	0.0385	-0.762	0.839	0.408	0.094	1.03925	0.466732	2.31405	20	5531	10	2454	0.924849	0.977954	not_significant	0.0167203	0.0339292	2.8611	2.6	3.122	0.133	21.451	0	-0.0512	-0.058	-0.045	0.003	-15.785	0	TRUE
Orchitis and epididymitis	genitourinary	-0.8494	-1.281	-0.418	0.22	-3.862	0.427671	0.277759	0.658362	42	5509	45	2419	0.000112487	0.00213726	con_significant	-0.36889	3.9489	2.8657	2.604	3.127	0.134	21.463	0	-0.0511	-0.057	-0.045	0.003	-15.726	0	TRUE
Organic or persistent insomnia	neurological	-0.1692	-0.959	0.62	0.403	-0.42	0.84434	0.383276	1.85893	17	5534	11	2453	0.674409	0.903995	not_significant	-0.0734826	0.171076	2.8602	2.599	3.122	0.133	21.439	0	-0.0512	-0.058	-0.045	0.003	-15.765	0	TRUE
Orthostatic hypotension	circulatory system	-0.142	-1.029	0.745	0.452	-0.314	0.867621	0.357364	2.10644	13	5538	10	2454	0.753632	0.918633	not_significant	-0.0616698	0.122841	2.8599	2.598	3.121	0.133	21.433	0	-0.0512	-0.058	-0.045	0.003	-15.76	0	TRUE
Osteitis deformans [Paget's disease of bone]	musculoskeletal	-0.2478	-3.044	2.548	1.426	-0.174	0.780516	0.0476439	12.7815	10	5541	10	2454	0.86211	0.958318	not_significant	-0.107618	0.0644372	2.8606	2.599	3.122	0.133	21.444	0	-0.0512	-0.058	-0.045	0.003	-15.777	0	TRUE
Osteitis deformans and osteopathies associated with other disorders classified elsewhere	musculoskeletal	0.2478	-2.237	2.732	1.268	0.196	1.2812	0.106778	15.3636	10	5541	10	2454	0.844987	0.954959	not_significant	0.107618	0.0731501	2.8615	2.6	3.123	0.133	21.452	0	-0.0513	-0.058	-0.045	0.003	-15.786	0	TRUE
Osteoarthritis; localized	musculoskeletal	-0.7814	-1.654	0.091	0.445	-1.755	0.457765	0.191283	1.09527	10	5541	13	2451	0.0792813	0.336524	not_significant	-0.339358	1.10083	2.8504	2.589	3.112	0.134	21.348	0	-0.0509	-0.057	-0.045	0.003	-15.658	0	TRUE
Osteoarthrosis NOS	musculoskeletal	-0.2548	-0.596	0.087	0.174	-1.463	0.775071	0.551011	1.0909	81	5470	65	2399	0.143511	0.45206	not_significant	-0.110658	0.843114	2.8423	2.58	3.105	0.134	21.215	0	-0.0507	-0.057	-0.044	0.003	-15.482	0	TRUE
Osteoarthrosis, generalized	musculoskeletal	0.1462	-1.598	1.891	0.89	0.164	1.15743	0.202301	6.62599	10	5541	10	2454	0.869573	0.958318	not_significant	0.0634939	0.0606938	2.8614	2.6	3.123	0.133	21.452	0	-0.0513	-0.058	-0.045	0.003	-15.785	0	TRUE
Osteoarthrosis, localized, primary	musculoskeletal	-0.8787	-1.267	-0.491	0.198	-4.438	0.415322	0.281675	0.612014	47	5504	64	2400	9.08216e-06	0.000258842	con_significant	-0.381615	5.04181	2.8261	2.564	3.088	0.134	21.145	0	-0.05	-0.056	-0.044	0.003	-15.351	0	TRUE
Osteoarthrosis, localized, secondary	musculoskeletal	-1.2783	-2.372	-0.185	0.558	-2.291	0.27851	0.093294	0.831104	10	5541	10	2454	0.0219697	0.150272	not_significant	-0.555159	1.65818	2.8555	2.594	3.117	0.133	21.4	0	-0.051	-0.057	-0.045	0.003	-15.712	0	TRUE
Osteochondritis dissecans	musculoskeletal	0.0565	-2.231	2.344	1.167	0.048	1.05813	0.107421	10.4228	10	5541	10	2454	0.961425	0.990384	not_significant	0.0245376	0.0170846	2.861	2.6	3.122	0.133	21.448	0	-0.0512	-0.058	-0.045	0.003	-15.783	0	TRUE
Osteochondropathies	musculoskeletal	-0.7355	-2.347	0.876	0.822	-0.895	0.479266	0.0956557	2.40128	10	5541	10	2454	0.370955	0.71503	not_significant	-0.319424	0.430678	2.8612	2.6	3.123	0.133	21.452	0	-0.0512	-0.058	-0.045	0.003	-15.78	0	TRUE
Osteopenia or other disorder of bone and cartilage	musculoskeletal	0.6449	0.154	1.136	0.25	2.575	1.9058	1.16649	3.11429	78	5473	22	2442	0.0100133	0.0826613	not_significant	0.280077	1.99942	2.8734	2.611	3.135	0.134	21.492	0	-0.0517	-0.058	-0.045	0.003	-15.881	0	TRUE
Osteoporosis NOS	musculoskeletal	1.8472	0.39	3.304	0.743	2.485	6.34204	1.47698	27.2213	24	5527	10	2454	0.0129544	0.100691	not_significant	0.802229	1.88758	2.8672	2.605	3.129	0.134	21.464	0	-0.0515	-0.058	-0.045	0.003	-15.833	0	TRUE
Otalgia	sense organs	-0.923	-1.309	-0.537	0.197	-4.683	0.397325	0.27009	0.584499	51	5500	58	2406	2.82278e-06	9.19576e-05	con_significant	-0.400854	5.54932	2.8696	2.608	3.132	0.134	21.477	0	-0.0511	-0.057	-0.045	0.003	-15.718	0	TRUE
Other abnormal blood chemistry	symptoms	-0.2887	-0.5	-0.078	0.108	-2.683	0.749237	0.606531	0.924964	248	5303	156	2308	0.00729257	0.0657633	not_significant	-0.125381	2.13712	2.8602	2.599	3.122	0.133	21.44	0	-0.0508	-0.057	-0.044	0.003	-15.642	0	TRUE
Other abnormal glucose	endocrine/metabolic	-0.211	-0.451	0.029	0.122	-1.723	0.809774	0.636991	1.02942	188	5363	121	2343	0.0849347	0.350575	not_significant	-0.0916361	1.07092	2.8497	2.588	3.111	0.134	21.34	0	-0.0507	-0.057	-0.044	0.003	-15.57	0	TRUE
Other abnormality of urination	genitourinary	0.0726	-0.335	0.48	0.208	0.349	1.0753	0.715338	1.61607	71	5480	40	2424	0.727269	0.908296	not_significant	0.0315298	0.138305	2.8645	2.602	3.127	0.134	21.42	0	-0.0514	-0.058	-0.045	0.003	-15.745	0	TRUE
Other acquired deformities of limbs	musculoskeletal	0.7888	-0.503	2.081	0.659	1.197	2.20075	0.604714	8.01248	13	5538	10	2454	0.231386	0.575819	not_significant	0.342571	0.635663	2.8621	2.601	3.124	0.133	21.457	0	-0.0513	-0.058	-0.045	0.003	-15.8	0	TRUE
Other acquired musculoskeletal deformity	musculoskeletal	-0.7435	-1.324	-0.163	0.296	-2.51	0.475447	0.266069	0.849591	23	5528	25	2439	0.012072	0.095067	not_significant	-0.322898	1.91822	2.8551	2.594	3.117	0.133	21.403	0	-0.051	-0.057	-0.045	0.003	-15.692	0	TRUE
Other acute and subacute forms of ischemic heart disease	circulatory system	1.168	-0.463	2.799	0.832	1.403	3.21556	0.629393	16.4282	10	5541	10	2454	0.160543	0.478036	not_significant	0.507256	0.794407	2.871	2.609	3.133	0.134	21.478	0	-0.0515	-0.058	-0.045	0.003	-15.83	0	TRUE
Other allied disorders of spine	musculoskeletal	-0.1974	-1.411	1.016	0.619	-0.319	0.820862	0.243899	2.76212	10	5541	10	2454	0.749785	0.91749	not_significant	-0.0857297	0.125063	2.8596	2.598	3.121	0.133	21.428	0	-0.0512	-0.058	-0.045	0.003	-15.757	0	TRUE
Other alveolar and parietoalveolar pneumonopathy	respiratory	0.5618	-1.649	2.772	1.128	0.498	1.75383	0.192242	15.9906	10	5541	10	2454	0.618411	0.879261	not_significant	0.243987	0.208723	2.8607	2.599	3.122	0.133	21.449	0	-0.0512	-0.058	-0.045	0.003	-15.785	0	TRUE
Other and unspecified coagulation defects	hematopoietic	1.42	0.188	2.652	0.629	2.259	4.13712	1.20683	14.1824	27	5524	10	2454	0.0238771	0.154491	not_significant	0.616698	1.62202	2.8595	2.598	3.121	0.134	21.414	0	-0.0513	-0.058	-0.045	0.003	-15.781	0	TRUE
Other and unspecified congenital anomalies	congenital anomalies	0.7186	-0.394	1.831	0.568	1.266	2.05156	0.674354	6.24012	19	5532	10	2454	0.2054	0.543946	not_significant	0.312084	0.6874	2.8593	2.598	3.121	0.133	21.429	0	-0.0512	-0.058	-0.045	0.003	-15.778	0	TRUE
Other and unspecified disc disorder	musculoskeletal	0.303	-0.582	1.188	0.452	0.671	1.35391	0.55878	3.28051	18	5533	10	2454	0.502176	0.828406	not_significant	0.131591	0.299144	2.8623	2.601	3.124	0.133	21.457	0	-0.0513	-0.058	-0.045	0.003	-15.796	0	TRUE
Other and unspecified disorders of the nervous system	neurological	0.1754	-0.847	1.198	0.522	0.336	1.19172	0.428699	3.31348	16	5535	10	2454	0.736773	0.911072	not_significant	0.0761753	0.132666	2.8599	2.598	3.121	0.133	21.434	0	-0.0512	-0.058	-0.045	0.003	-15.775	0	TRUE
Other anemias	hematopoietic	0.8957	0.583	1.208	0.16	5.613	2.44905	1.7914	3.34678	221	5330	56	2408	1.99107e-08	8.43277e-07	mi_significant	0.388998	7.70091	2.9469	2.682	3.212	0.135	21.785	0	-0.054	-0.061	-0.048	0.003	-16.345	0	TRUE
Other arthropathies	musculoskeletal	-0.9527	-2.927	1.022	1.007	-0.946	0.385698	0.0535575	2.77875	10	5541	10	2454	0.344263	0.691415	not_significant	-0.413752	0.463109	2.8627	2.601	3.124	0.133	21.46	0	-0.0513	-0.058	-0.045	0.003	-15.792	0	TRUE
Other benign neoplasm of connective and other soft tissue	neoplasms	-0.3151	-1.056	0.426	0.378	-0.833	0.729716	0.347844	1.53112	19	5532	12	2452	0.404666	0.75147	not_significant	-0.136846	0.392904	2.8616	2.6	3.123	0.133	21.455	0	-0.0512	-0.058	-0.045	0.003	-15.779	0	TRUE
Other cardiac conduction disorders	circulatory system	0.0438	-1.126	1.214	0.597	0.073	1.04477	0.324328	3.36693	10	5541	10	2454	0.941564	0.981985	not_significant	0.0190221	0.0261503	2.8613	2.6	3.123	0.133	21.449	0	-0.0513	-0.058	-0.045	0.003	-15.781	0	TRUE
Other cardiomyopathy	circulatory system	-1.0679	-3.885	1.749	1.437	-0.743	0.34373	0.0205478	5.74885	10	5541	10	2454	0.457506	0.792808	not_significant	-0.463783	0.339603	2.8624	2.601	3.124	0.133	21.459	0	-0.0513	-0.058	-0.045	0.003	-15.791	0	TRUE
Other chronic ischemic heart disease, unspecified	circulatory system	-1.3068	-2.715	0.102	0.719	-1.818	0.270685	0.066205	1.10738	10	5541	10	2454	0.069016	0.31477	not_significant	-0.567536	1.16105	2.8519	2.59	3.114	0.134	21.333	0	-0.051	-0.057	-0.045	0.003	-15.657	0	TRUE
Other chronic nonalcoholic liver disease	digestive	-0.1726	-0.464	0.119	0.149	-1.161	0.841474	0.628764	1.12637	137	5414	75	2389	0.245655	0.587763	not_significant	-0.0749592	0.609674	2.8634	2.602	3.125	0.133	21.461	0	-0.0512	-0.058	-0.045	0.003	-15.761	0	TRUE
Other conditions of brain, NOS	neurological	-0.4167	-1.045	0.212	0.321	-1.299	0.659219	0.351692	1.23615	24	5527	18	2446	0.193832	0.527179	not_significant	-0.180971	0.712575	2.8599	2.598	3.121	0.133	21.44	0	-0.0512	-0.058	-0.045	0.003	-15.753	0	TRUE
Other demyelinating diseases of central nervous system	neurological	0.0044	-1.704	1.713	0.872	0.005	1.00441	0.181954	5.54557	10	5541	10	2454	0.995973	0.998476	not_significant	0.0019109	0.0017524	2.8611	2.6	3.123	0.133	21.452	0	-0.0512	-0.058	-0.045	0.003	-15.785	0	TRUE
Other derangement of joint	musculoskeletal	-1.4689	-1.909	-1.029	0.224	-6.547	0.230179	0.148229	0.357364	31	5520	61	2403	5.8787e-11	4.39801e-09	con_significant	-0.637935	10.2307	2.8709	2.609	3.133	0.134	21.48	0	-0.051	-0.057	-0.045	0.003	-15.686	0	TRUE
Other diseases of blood and blood-forming organs	hematopoietic	0.2129	-0.603	1.029	0.416	0.511	1.23726	0.547168	2.79827	22	5529	10	2454	0.609131	0.875321	not_significant	0.0924613	0.21529	2.8619	2.6	3.123	0.133	21.454	0	-0.0513	-0.058	-0.045	0.003	-15.792	0	TRUE
Other diseases of lung	respiratory	0.4992	-0.035	1.033	0.272	1.833	1.6474	0.965605	2.80948	64	5487	19	2445	0.0668693	0.307759	not_significant	0.2168	1.17477	2.8632	2.602	3.125	0.133	21.45	0	-0.0514	-0.058	-0.045	0.003	-15.818	0	TRUE
Other diseases of respiratory system, NEC	respiratory	-0.6549	-1.447	0.137	0.404	-1.621	0.519494	0.235275	1.14683	14	5537	12	2452	0.105005	0.390345	not_significant	-0.284419	0.97879	2.863	2.602	3.125	0.133	21.462	0	-0.0512	-0.058	-0.045	0.003	-15.78	0	TRUE
Other diseases of the teeth and supporting structures	digestive	-0.4662	-1.572	0.639	0.564	-0.827	0.627382	0.20763	1.89459	10	5541	10	2454	0.408485	0.75147	not_significant	-0.202468	0.388824	2.8614	2.6	3.123	0.133	21.449	0	-0.0512	-0.058	-0.045	0.003	-15.777	0	TRUE
Other disorders of arteries and arterioles	circulatory system	0.8426	-0.185	1.87	0.524	1.607	2.3224	0.831104	6.4883	19	5532	10	2454	0.10805	0.397339	not_significant	0.365937	0.966374	2.8693	2.607	3.131	0.134	21.479	0	-0.0515	-0.058	-0.045	0.003	-15.833	0	TRUE
Other disorders of biliary tract	digestive	0.2535	-0.962	1.469	0.62	0.409	1.28853	0.382128	4.34489	10	5541	10	2454	0.682787	0.907099	not_significant	0.110094	0.165715	2.8621	2.601	3.124	0.133	21.455	0	-0.0513	-0.058	-0.045	0.003	-15.79	0	TRUE
Other disorders of bladder	genitourinary	-0.1962	-1.071	0.679	0.447	-0.439	0.821848	0.342666	1.9719	13	5538	10	2454	0.660468	0.897618	not_significant	-0.0852086	0.180148	2.859	2.597	3.121	0.133	21.419	0	-0.0512	-0.058	-0.045	0.003	-15.745	0	TRUE
Other disorders of bone and cartilage	musculoskeletal	-0.7314	-1.144	-0.318	0.211	-3.471	0.481235	0.318542	0.727603	51	5500	45	2419	0.000517621	0.00793189	con_significant	-0.317643	3.28599	2.875	2.613	3.137	0.134	21.519	0	-0.0514	-0.058	-0.045	0.003	-15.8	0	TRUE
Other disorders of carbohydrate transport and metabolism	endocrine/metabolic	-0.4802	-2.982	2.021	1.276	-0.376	0.61866	0.0506913	7.54587	10	5541	10	2454	0.706737	0.908296	not_significant	-0.208548	0.150742	2.8588	2.597	3.12	0.134	21.411	0	-0.0512	-0.058	-0.045	0.003	-15.745	0	TRUE
Other disorders of cervical region	musculoskeletal	0.491	-0.879	1.861	0.699	0.702	1.63395	0.415198	6.43016	10	5541	10	2454	0.482482	0.807735	not_significant	0.213239	0.316519	2.8633	2.602	3.125	0.133	21.461	0	-0.0513	-0.058	-0.045	0.003	-15.799	0	TRUE
Other disorders of circulatory system	circulatory system	-0.3431	-2.172	1.486	0.933	-0.368	0.709567	0.113949	4.41938	10	5541	10	2454	0.713186	0.908296	not_significant	-0.149006	0.146797	2.8611	2.6	3.122	0.133	21.452	0	-0.0512	-0.058	-0.045	0.003	-15.784	0	TRUE
Other disorders of ear	sense organs	-0.7372	-1.295	-0.179	0.285	-2.589	0.478452	0.273898	0.836106	26	5525	26	2438	0.00961265	0.0804639	not_significant	-0.320162	2.01716	2.86	2.599	3.121	0.133	21.44	0	-0.0511	-0.057	-0.045	0.003	-15.732	0	TRUE
Other disorders of eye	sense organs	-0.4096	-1.082	0.263	0.343	-1.194	0.663916	0.338917	1.30083	21	5530	16	2448	0.232649	0.577762	not_significant	-0.177887	0.633298	2.8594	2.598	3.121	0.133	21.436	0	-0.0512	-0.058	-0.045	0.003	-15.751	0	TRUE
Other disorders of eyelids	sense organs	-0.343	-0.981	0.295	0.326	-1.054	0.709638	0.374936	1.34313	24	5527	17	2447	0.292096	0.640364	not_significant	-0.148963	0.534475	2.8597	2.598	3.121	0.133	21.44	0	-0.0512	-0.058	-0.045	0.003	-15.755	0	TRUE
Other disorders of gallbladder	digestive	-0.5206	-1.422	0.381	0.46	-1.132	0.594164	0.241231	1.46375	11	5540	10	2454	0.257802	0.602713	not_significant	-0.226094	0.588714	2.8605	2.599	3.122	0.133	21.449	0	-0.0512	-0.058	-0.045	0.003	-15.77	0	TRUE
Other disorders of intestine	digestive	-0.0204	-0.546	0.505	0.268	-0.076	0.979807	0.579262	1.65699	41	5510	24	2440	0.939195	0.980991	not_significant	-0.00885961	0.0272443	2.8607	2.599	3.122	0.134	21.427	0	-0.0512	-0.058	-0.045	0.003	-15.749	0	TRUE
Other disorders of lipoid metabolism	endocrine/metabolic	-0.1936	-1.084	0.697	0.455	-0.426	0.823987	0.33824	2.00772	14	5537	10	2454	0.670155	0.902719	not_significant	-0.0840794	0.173825	2.8614	2.6	3.123	0.133	21.451	0	-0.0512	-0.058	-0.045	0.003	-15.781	0	TRUE
Other disorders of liver	digestive	0.0262	-0.432	0.485	0.234	0.112	1.02655	0.649209	1.62418	60	5491	29	2435	0.910638	0.972376	not_significant	0.0113785	0.0406545	2.8613	2.6	3.123	0.133	21.451	0	-0.0513	-0.058	-0.045	0.003	-15.78	0	TRUE
Other disorders of male genital organs	genitourinary	-0.2865	-0.46	-0.113	0.089	-3.234	0.750887	0.631284	0.893151	402	5149	230	2234	0.00121954	0.0156967	con_significant	-0.124425	2.9138	2.8856	2.624	3.148	0.134	21.579	0	-0.0513	-0.058	-0.045	0.003	-15.784	0	TRUE
Other disorders of metabolism	endocrine/metabolic	0.9728	0.481	1.464	0.251	3.879	2.64534	1.61769	4.32322	85	5466	22	2442	0.000104979	0.00202677	mi_significant	0.422482	3.9789	2.9167	2.653	3.181	0.135	21.665	0	-0.0529	-0.059	-0.046	0.003	-16.109	0	TRUE
Other disorders of middle ear and mastoid	sense organs	-0.7606	-2.725	1.204	1.002	-0.759	0.467386	0.0655462	3.33342	10	5541	10	2454	0.447937	0.785037	not_significant	-0.330324	0.348783	2.8613	2.6	3.123	0.133	21.453	0	-0.0512	-0.058	-0.045	0.003	-15.783	0	TRUE
Other disorders of peritoneum	digestive	-0.5389	-2.501	1.424	1.001	-0.538	0.58339	0.082003	4.1537	10	5541	10	2454	0.590467	0.866265	not_significant	-0.234041	0.228804	2.862	2.601	3.123	0.133	21.452	0	-0.0513	-0.058	-0.045	0.003	-15.785	0	TRUE
Other disorders of prostate	genitourinary	-0.4319	-1.614	0.75	0.603	-0.716	0.649274	0.19909	2.117	10	5541	10	2454	0.473952	0.802029	not_significant	-0.187572	0.324265	2.8566	2.595	3.118	0.134	21.388	0	-0.0511	-0.057	-0.045	0.003	-15.716	0	TRUE
Other disorders of soft tissues	musculoskeletal	-0.8196	-1.355	-0.284	0.273	-3.001	0.440608	0.257947	0.752767	27	5524	30	2434	0.00268777	0.0282216	con_significant	-0.355948	2.57061	2.8576	2.596	3.119	0.133	21.42	0	-0.051	-0.057	-0.045	0.003	-15.7	0	TRUE
Other disorders of stomach and duodenum	digestive	0.0117	-0.52	0.543	0.271	0.043	1.01177	0.594521	1.72116	41	5510	23	2441	0.965588	0.991243	not_significant	0.00508125	0.0152084	2.8613	2.6	3.123	0.133	21.435	0	-0.0513	-0.058	-0.045	0.003	-15.76	0	TRUE
Other disorders of synovium, tendon, and bursa	musculoskeletal	-0.8985	-1.43	-0.367	0.271	-3.316	0.40718	0.239309	0.69281	26	5525	31	2433	0.00091404	0.0127222	con_significant	-0.390214	3.03903	2.8588	2.597	3.12	0.133	21.429	0	-0.051	-0.057	-0.045	0.003	-15.706	0	TRUE
Other disorders of testis	genitourinary	2.2485	1.61	2.887	0.326	6.898	9.47351	5.00281	17.9394	223	5328	10	2454	5.26776e-12	4.85039e-10	mi_significant	0.976511	11.2784	2.7964	2.532	3.061	0.135	20.755	0	-0.0505	-0.057	-0.044	0.003	-15.399	0	TRUE
Other disorders of the kidney and ureters	genitourinary	0.2398	-0.224	0.704	0.237	1.013	1.27099	0.799315	2.02182	64	5487	28	2436	0.310828	0.663944	not_significant	0.104144	0.50748	2.8667	2.605	3.128	0.134	21.472	0	-0.0515	-0.058	-0.045	0.003	-15.816	0	TRUE
Other disorders of thyroid	endocrine/metabolic	-0.1677	-0.988	0.653	0.419	-0.401	0.845607	0.372321	1.9213	16	5535	10	2454	0.688634	0.907807	not_significant	-0.0728312	0.162011	2.8602	2.599	3.122	0.133	21.443	0	-0.0512	-0.058	-0.045	0.003	-15.768	0	TRUE
Other disorders of tympanic membrane	sense organs	-1.4146	-3.208	0.379	0.915	-1.546	0.243023	0.0404374	1.46082	10	5541	10	2454	0.122118	0.421795	not_significant	-0.614353	0.913221	2.865	2.604	3.127	0.133	21.472	0	-0.0513	-0.058	-0.045	0.003	-15.803	0	TRUE
Other disorders of urethra and urinary tract	genitourinary	0.1625	-1.579	1.904	0.889	0.183	1.17645	0.206181	6.71269	10	5541	10	2454	0.854918	0.955496	not_significant	0.0705729	0.0680758	2.8615	2.6	3.123	0.133	21.452	0	-0.0513	-0.058	-0.045	0.003	-15.786	0	TRUE
Other dyschromia	dermatologic	-0.8445	-1.092	-0.597	0.126	-6.682	0.429772	0.335545	0.550461	132	5419	141	2323	2.3553e-11	1.87953e-09	con_significant	-0.366762	10.628	2.8625	2.6	3.125	0.134	21.408	0	-0.0505	-0.057	-0.044	0.003	-15.506	0	TRUE
Other dyspnea	respiratory	-0.4325	-0.666	-0.199	0.119	-3.629	0.648885	0.51376	0.81955	184	5367	135	2329	0.000284488	0.00479623	con_significant	-0.187832	3.54594	2.8578	2.596	3.12	0.134	21.389	0	-0.0507	-0.057	-0.044	0.003	-15.575	0	TRUE
Other endocrine disorders	endocrine/metabolic	1.124	0.142	2.106	0.501	2.244	3.07714	1.15258	8.21531	29	5522	10	2454	0.024809	0.15752	not_significant	0.488147	1.60539	2.8668	2.605	3.129	0.134	21.467	0	-0.0515	-0.058	-0.045	0.003	-15.833	0	TRUE
Other forms of chronic heart disease	circulatory system	-0.2835	-1.214	0.647	0.475	-0.597	0.753143	0.297007	1.9098	11	5540	10	2454	0.550436	0.849983	not_significant	-0.123122	0.259293	2.8586	2.597	3.12	0.133	21.419	0	-0.0512	-0.058	-0.045	0.003	-15.744	0	TRUE
Other headache syndromes	neurological	-0.2977	-0.527	-0.069	0.117	-2.547	0.742524	0.590373	0.933327	214	5337	128	2336	0.0108723	0.0873433	not_significant	-0.129289	1.96368	2.8713	2.61	3.133	0.133	21.51	0	-0.0512	-0.058	-0.045	0.003	-15.758	0	TRUE
Other heart block	circulatory system	-0.017	-2.958	2.924	1.501	-0.011	0.983144	0.0519227	18.6156	10	5541	10	2454	0.990986	0.998184	not_significant	-0.00738301	0.00393259	2.8611	2.6	3.123	0.133	21.442	0	-0.0512	-0.058	-0.045	0.003	-15.776	0	TRUE
Other hemoglobinopathies	hematopoietic	0.6615	-0.127	1.45	0.402	1.644	1.9377	0.880734	4.26311	32	5519	10	2454	0.100114	0.382706	not_significant	0.287286	0.999507	2.8615	2.6	3.123	0.133	21.449	0	-0.0513	-0.058	-0.045	0.003	-15.804	0	TRUE
Other hereditary hemolytic anemias	hematopoietic	-1.7455	-4.042	0.551	1.172	-1.489	0.174558	0.0175623	1.73499	10	5541	10	2454	0.136382	0.438843	not_significant	-0.758061	0.865242	2.8599	2.598	3.121	0.133	21.44	0	-0.0512	-0.058	-0.045	0.003	-15.766	0	TRUE
Other hypertensive complications	circulatory system	-0.1057	-0.8	0.589	0.354	-0.298	0.899695	0.449329	1.80219	22	5529	15	2449	0.765576	0.923785	not_significant	-0.0459049	0.116012	2.8594	2.598	3.121	0.134	21.419	0	-0.0512	-0.058	-0.045	0.003	-15.742	0	TRUE
Other hypertrophic and atrophic conditions of skin	dermatologic	-0.2615	-0.595	0.072	0.17	-1.535	0.769896	0.551563	1.07466	93	5458	61	2403	0.124669	0.421795	not_significant	-0.113568	0.904241	2.8566	2.595	3.118	0.133	21.413	0	-0.051	-0.057	-0.045	0.003	-15.691	0	TRUE
Other hypertrophic cardiomyopathy	circulatory system	-0.7441	-2.111	0.622	0.697	-1.067	0.475162	0.121117	1.86265	10	5541	10	2454	0.285837	0.632548	not_significant	-0.323159	0.543882	2.8582	2.597	3.12	0.133	21.425	0	-0.0512	-0.058	-0.045	0.003	-15.749	0	TRUE
Other ill-defined and unknown causes of morbidity and mortality		0.3752	0.142	0.608	0.119	3.153	1.45528	1.15258	1.83675	324	5227	101	2363	0.00161397	0.0195144	mi_significant	0.162947	2.7921	2.8457	2.584	3.108	0.134	21.295	0	-0.0513	-0.058	-0.045	0.003	-15.781	0	TRUE
Other immunological findings	endocrine/metabolic	-1.4833	-3.218	0.252	0.885	-1.676	0.226888	0.040035	1.2866	10	5541	10	2454	0.0938089	0.372502	not_significant	-0.644189	1.02776	2.8616	2.6	3.123	0.133	21.455	0	-0.0512	-0.058	-0.045	0.003	-15.779	0	TRUE
Other infectious and parasitic diseases	infectious diseases	0.3538	-0.487	1.194	0.429	0.825	1.42447	0.614467	3.30026	22	5529	10	2454	0.409331	0.751486	not_significant	0.153653	0.387925	2.8625	2.601	3.124	0.133	21.459	0	-0.0513	-0.058	-0.045	0.003	-15.8	0	TRUE
Other inflammatory disorders of male genital organs	genitourinary	-1.733	-2.937	-0.529	0.614	-2.821	0.176753	0.0530246	0.589194	10	5541	10	2454	0.00479146	0.045883	con_significant	-0.752632	2.31953	2.8682	2.607	3.13	0.134	21.484	0	-0.0513	-0.058	-0.045	0.003	-15.803	0	TRUE
Other intestinal obstruction	digestive	0.1877	-0.771	1.147	0.489	0.384	1.20647	0.46255	3.14873	17	5534	10	2454	0.7013	0.908296	not_significant	0.0815171	0.154096	2.8605	2.599	3.122	0.133	21.444	0	-0.0512	-0.058	-0.045	0.003	-15.783	0	TRUE
Other local infections of skin and subcutaneous tissue	dermatologic	-0.2884	-0.785	0.208	0.253	-1.139	0.749462	0.45612	1.23121	43	5508	27	2437	0.254684	0.597759	not_significant	-0.125251	0.593998	2.8612	2.6	3.123	0.133	21.454	0	-0.0512	-0.058	-0.045	0.003	-15.765	0	TRUE
Other non-epithelial cancer of skin	neoplasms	0.5829	-0.355	1.521	0.479	1.218	1.79123	0.701173	4.5768	15	5536	10	2454	0.223344	0.566404	not_significant	0.25315	0.651026	2.8735	2.611	3.136	0.134	21.477	0	-0.0516	-0.058	-0.045	0.003	-15.829	0	TRUE
Other nondiabetic retinopathy	sense organs	0.1517	-1.277	1.581	0.729	0.208	1.16381	0.278873	4.85981	10	5541	10	2454	0.835158	0.953959	not_significant	0.0658825	0.0782316	2.8616	2.6	3.123	0.133	21.452	0	-0.0513	-0.058	-0.045	0.003	-15.785	0	TRUE
Other nonspecific findings on examination of urine	genitourinary	0.5543	0.149	0.959	0.207	2.683	1.74072	1.16067	2.60909	99	5452	35	2429	0.00730704	0.0657633	not_significant	0.240729	2.13626	2.891	2.628	3.154	0.134	21.562	0	-0.0522	-0.059	-0.046	0.003	-15.96	0	TRUE
Other nutritional deficiency	endocrine/metabolic	-0.4957	-2.291	1.3	0.916	-0.541	0.609144	0.101165	3.6693	10	5541	10	2454	0.588368	0.866265	not_significant	-0.21528	0.230351	2.8619	2.6	3.123	0.133	21.455	0	-0.0513	-0.058	-0.045	0.003	-15.788	0	TRUE
Other open wound of head and face	injuries & poisonings	-0.6802	-1.29	-0.071	0.311	-2.188	0.506516	0.275271	0.931462	22	5529	21	2443	0.0286682	0.170726	not_significant	-0.295407	1.5426	2.8603	2.599	3.122	0.133	21.442	0	-0.0511	-0.057	-0.045	0.003	-15.744	0	TRUE
Other paralytic syndromes	neurological	0.5207	-0.586	1.628	0.565	0.922	1.68321	0.556549	5.09368	16	5535	10	2454	0.356662	0.701026	not_significant	0.226137	0.447743	2.8591	2.598	3.121	0.133	21.434	0	-0.0512	-0.058	-0.045	0.003	-15.778	0	TRUE
Other peripheral nerve disorders	neurological	-0.2265	-0.53	0.077	0.155	-1.463	0.797319	0.588605	1.08004	116	5435	74	2390	0.143363	0.45206	not_significant	-0.0983677	0.843564	2.8557	2.594	3.117	0.133	21.403	0	-0.051	-0.057	-0.045	0.003	-15.673	0	TRUE
Other persistent mental disorders due to conditions classified elsewhere	mental disorders	-0.3136	-1.457	0.83	0.584	-0.537	0.730811	0.232934	2.29332	10	5541	10	2454	0.591013	0.866265	not_significant	-0.136195	0.228403	2.8613	2.6	3.123	0.133	21.454	0	-0.0512	-0.058	-0.045	0.003	-15.783	0	TRUE
Other pulmonary inflamation or edema	respiratory	-0.1553	-2.062	1.751	0.973	-0.16	0.856158	0.127199	5.76036	10	5541	10	2454	0.873139	0.958318	not_significant	-0.0674459	0.0589167	2.8609	2.599	3.122	0.133	21.449	0	-0.0512	-0.058	-0.045	0.003	-15.781	0	TRUE
Other retinal disorders	sense organs	-0.5413	-1.212	0.13	0.342	-1.581	0.581991	0.297601	1.13883	19	5532	18	2446	0.113831	0.405121	not_significant	-0.235084	0.94374	2.8558	2.594	3.117	0.133	21.397	0	-0.051	-0.057	-0.045	0.003	-15.705	0	TRUE
Other signs and symptoms involving emotional state		-1.207	-2.221	-0.193	0.518	-2.332	0.299093	0.108501	0.824482	10	5541	10	2454	0.0196942	0.137758	not_significant	-0.524193	1.70566	2.8683	2.607	3.13	0.133	21.49	0	-0.0514	-0.058	-0.045	0.003	-15.812	0	TRUE
Other specified cardiac dysrhythmias	circulatory system	0.0871	-0.262	0.436	0.178	0.49	1.09101	0.769511	1.54651	111	5440	50	2414	0.624482	0.882851	not_significant	0.037827	0.20448	2.862	2.601	3.123	0.133	21.454	0	-0.0513	-0.058	-0.045	0.003	-15.79	0	TRUE
Other specified congenital anomalies of kidney	congenital anomalies	-0.1297	-1.307	1.047	0.601	-0.216	0.878359	0.270631	2.84909	10	5541	10	2454	0.82901	0.953093	not_significant	-0.056328	0.0814404	2.862	2.6	3.123	0.133	21.449	0	-0.0513	-0.058	-0.045	0.003	-15.786	0	TRUE
Other specified congenital anomalies of nervous system	congenital anomalies	-0.9532	-2.926	1.02	1.007	-0.947	0.385505	0.0536111	2.77319	10	5541	10	2454	0.343741	0.691415	not_significant	-0.41397	0.463768	2.8627	2.601	3.124	0.133	21.46	0	-0.0513	-0.058	-0.045	0.003	-15.792	0	TRUE
Other specified diseases of hair and hair follicles	dermatologic	-0.0897	-0.503	0.324	0.211	-0.425	0.914205	0.604714	1.38265	72	5479	35	2429	0.670658	0.902719	not_significant	-0.0389562	0.173499	2.8622	2.601	3.124	0.133	21.456	0	-0.0512	-0.058	-0.045	0.003	-15.785	0	TRUE
Other specified diseases of sebaceous glands	dermatologic	0.4309	-0.072	0.934	0.257	1.678	1.53864	0.930531	2.54467	63	5488	22	2442	0.0933531	0.372479	not_significant	0.187137	1.02987	2.8679	2.606	3.13	0.133	21.483	0	-0.0515	-0.058	-0.045	0.003	-15.843	0	TRUE
Other specified diseases of the salivary glands	digestive	-0.1534	-1.553	1.246	0.714	-0.215	0.857787	0.211612	3.47641	10	5541	10	2454	0.829858	0.953093	not_significant	-0.0666208	0.0809961	2.8614	2.6	3.123	0.133	21.453	0	-0.0512	-0.058	-0.045	0.003	-15.786	0	TRUE
Other specified disorders involving the immune mechanism	endocrine/metabolic	0.72	-1.489	2.929	1.127	0.639	2.05443	0.225598	18.7089	10	5541	10	2454	0.522862	0.840683	not_significant	0.312692	0.281613	2.8615	2.6	3.123	0.133	21.454	0	-0.0513	-0.058	-0.045	0.003	-15.79	0	TRUE
Other specified disorders of plasma protein metabolism	endocrine/metabolic	-0.4959	-1.731	0.74	0.63	-0.787	0.609023	0.177107	2.09594	10	5541	10	2454	0.431416	0.775604	not_significant	-0.215367	0.365104	2.8602	2.599	3.122	0.133	21.446	0	-0.0512	-0.058	-0.045	0.003	-15.772	0	TRUE
Other specified erythematous conditions	dermatologic	-0.433	-1.227	0.361	0.405	-1.069	0.64856	0.293171	1.43476	15	5536	11	2453	0.284911	0.632548	not_significant	-0.18805	0.545291	2.861	2.6	3.122	0.133	21.452	0	-0.0512	-0.058	-0.045	0.003	-15.773	0	TRUE
Other specified gastritis	digestive	0.2534	-0.656	1.163	0.464	0.546	1.2884	0.518923	3.19952	17	5534	10	2454	0.585161	0.863914	not_significant	0.11005	0.232724	2.8623	2.601	3.124	0.133	21.455	0	-0.0513	-0.058	-0.045	0.003	-15.792	0	TRUE
Other specified osteoporosis		1.2048	-0.948	3.358	1.099	1.097	3.33609	0.387515	28.7317	10	5541	10	2454	0.272735	0.623022	not_significant	0.523238	0.56426	2.8629	2.601	3.124	0.133	21.459	0	-0.0513	-0.058	-0.045	0.003	-15.8	0	TRUE
Other sprains and strains		-0.4951	-1.009	0.019	0.262	-1.888	0.60951	0.364583	1.01918	35	5516	27	2437	0.059085	0.281772	not_significant	-0.215019	1.22852	2.8617	2.6	3.123	0.133	21.453	0	-0.0512	-0.058	-0.045	0.003	-15.755	0	TRUE
Other symptoms		-0.3466	-0.753	0.06	0.208	-1.67	0.707088	0.470952	1.06184	62	5489	41	2423	0.0949155	0.37373	not_significant	-0.150526	1.02266	2.8622	2.601	3.124	0.133	21.454	0	-0.0512	-0.058	-0.045	0.003	-15.752	0	TRUE
Other symptoms involving abdomen and pelvis	digestive	-0.0653	-0.693	0.562	0.32	-0.204	0.936786	0.500074	1.75418	31	5520	16	2448	0.838438	0.954762	not_significant	-0.0283594	0.0765291	2.8609	2.6	3.122	0.133	21.451	0	-0.0512	-0.058	-0.045	0.003	-15.778	0	TRUE
Other symptoms involving urinary system	genitourinary	-0.1322	-0.867	0.602	0.375	-0.353	0.876166	0.42021	1.82577	20	5531	13	2451	0.724177	0.908296	not_significant	-0.0574137	0.140156	2.8599	2.598	3.121	0.133	21.433	0	-0.0512	-0.058	-0.045	0.003	-15.758	0	TRUE
Other symptoms referable to back	musculoskeletal	-0.5177	-1.178	0.143	0.337	-1.537	0.59589	0.307894	1.15373	21	5530	16	2448	0.124369	0.421795	not_significant	-0.224834	0.905286	2.863	2.602	3.124	0.133	21.462	0	-0.0512	-0.058	-0.045	0.003	-15.778	0	TRUE
Other symptoms/disorders or the urinary system	genitourinary	0.3127	-0.701	1.326	0.517	0.605	1.36711	0.496089	3.76595	16	5535	10	2454	0.545412	0.849983	not_significant	0.135804	0.263275	2.8599	2.598	3.121	0.133	21.441	0	-0.0512	-0.058	-0.045	0.003	-15.782	0	TRUE
Other tests		-0.0517	-0.336	0.232	0.145	-0.357	0.949614	0.714623	1.26112	154	5397	78	2386	0.721021	0.908296	not_significant	-0.022453	0.142052	2.8608	2.599	3.122	0.133	21.45	0	-0.0512	-0.058	-0.045	0.003	-15.76	0	TRUE
Other unspecified back disorders	musculoskeletal	0.6905	-0.41	1.791	0.562	1.229	1.99471	0.66365	5.99544	17	5534	10	2454	0.218972	0.559049	not_significant	0.29988	0.659611	2.8607	2.599	3.122	0.133	21.446	0	-0.0513	-0.058	-0.045	0.003	-15.791	0	TRUE
Other upper respiratory disease	respiratory	-0.4337	-0.649	-0.218	0.11	-3.943	0.648107	0.522568	0.804125	220	5331	156	2308	8.05446e-05	0.00166227	con_significant	-0.188354	4.09396	2.8659	2.604	3.128	0.134	21.463	0	-0.0508	-0.057	-0.044	0.003	-15.632	0	TRUE
Other venous embolism and thrombosis	circulatory system	0.1113	-0.624	0.847	0.375	0.297	1.11773	0.535797	2.33264	26	5525	11	2453	0.766671	0.924175	not_significant	0.048337	0.115391	2.8611	2.6	3.122	0.133	21.452	0	-0.0513	-0.058	-0.045	0.003	-15.788	0	TRUE
Other vitamin B12 deficiency anemia	hematopoietic	0.5233	-0.482	1.529	0.513	1.02	1.68759	0.617547	4.61356	18	5533	10	2454	0.307687	0.660266	not_significant	0.227266	0.511891	2.8607	2.599	3.122	0.133	21.447	0	-0.0513	-0.058	-0.045	0.003	-15.791	0	TRUE
Otitis externa	sense organs	-0.6929	-1.14	-0.245	0.228	-3.035	0.500124	0.319819	0.782705	40	5511	41	2423	0.00240607	0.0254873	con_significant	-0.300923	2.61869	2.8532	2.592	3.115	0.133	21.376	0	-0.0509	-0.057	-0.044	0.003	-15.644	0	TRUE
Otitis media	sense organs	-0.7307	-1.284	-0.177	0.283	-2.586	0.481572	0.276927	0.83778	26	5525	26	2438	0.00969898	0.0806228	not_significant	-0.317339	2.01327	2.8604	2.599	3.122	0.133	21.44	0	-0.0511	-0.057	-0.045	0.003	-15.733	0	TRUE
Otorrhea	sense organs	-0.3459	-1.776	1.085	0.73	-0.474	0.707583	0.169314	2.95944	10	5541	10	2454	0.635533	0.884729	not_significant	-0.150222	0.196862	2.8589	2.597	3.12	0.133	21.425	0	-0.0512	-0.058	-0.045	0.003	-15.754	0	TRUE
Overweight, obesity and other hyperalimentation	endocrine/metabolic	-0.0119	-2.449	2.425	1.243	-0.01	0.988171	0.0863799	11.3022	10	5541	10	2454	0.992347	0.998184	not_significant	-0.0051681	0.00333643	2.8611	2.6	3.123	0.133	21.452	0	-0.0512	-0.058	-0.045	0.003	-15.785	0	TRUE
Pain and other symptoms associated with female genital organs	genitourinary	0.6138	-1.63	2.858	1.145	0.536	1.84744	0.19593	17.4266	10	5541	10	2454	0.591834	0.866265	not_significant	0.26657	0.2278	2.8612	2.6	3.123	0.133	21.449	0	-0.0513	-0.058	-0.045	0.003	-15.786	0	TRUE
Pain in joint	musculoskeletal	-0.6568	-0.783	-0.531	0.064	-10.235	0.518508	0.457033	0.588017	688	4863	564	1900	1.38264e-24	3.31005e-22	con_significant	-0.285245	23.8593	2.8593	2.597	3.122	0.134	21.344	0	-0.0484	-0.055	-0.042	0.003	-14.802	0	TRUE
Pain in limb	symptoms	-0.5968	-0.763	-0.431	0.085	-7.04	0.550571	0.466266	0.649859	352	5199	295	2169	1.92511e-12	2.07774e-10	con_significant	-0.259187	11.7155	2.8468	2.585	3.109	0.134	21.273	0	-0.0496	-0.056	-0.043	0.003	-15.185	0	TRUE
Pain, swelling or discharge of eye	sense organs	-0.8849	-1.389	-0.38	0.257	-3.438	0.412755	0.249325	0.683861	31	5520	32	2432	0.000586346	0.0087732	con_significant	-0.384307	3.23185	2.872	2.61	3.134	0.133	21.514	0	-0.0513	-0.058	-0.045	0.003	-15.802	0	TRUE
Painful respiration	respiratory	-0.1962	-0.639	0.247	0.226	-0.868	0.821848	0.52782	1.28018	61	5490	31	2433	0.385577	0.731436	not_significant	-0.0852086	0.413889	2.8653	2.604	3.127	0.133	21.465	0	-0.0513	-0.058	-0.045	0.003	-15.795	0	TRUE
Palindromic rheumatism	musculoskeletal	-1.0423	-3.826	1.741	1.42	-0.734	0.352643	0.0217966	5.70304	10	5541	10	2454	0.463022	0.793771	not_significant	-0.452665	0.334399	2.8624	2.601	3.124	0.133	21.458	0	-0.0513	-0.058	-0.045	0.003	-15.791	0	TRUE
Pallor and flushing	symptoms	-0.9296	-2.135	0.276	0.615	-1.512	0.394712	0.118245	1.31785	10	5541	10	2454	0.130646	0.430287	not_significant	-0.40372	0.883902	2.8613	2.6	3.123	0.133	21.45	0	-0.0512	-0.058	-0.045	0.003	-15.774	0	TRUE
Palpitations	circulatory system	-0.7948	-1.073	-0.517	0.142	-5.608	0.451672	0.341981	0.596307	105	5446	110	2354	2.04303e-08	8.43277e-07	con_significant	-0.345177	7.68973	2.855	2.593	3.117	0.134	21.378	0	-0.0505	-0.057	-0.044	0.003	-15.526	0	TRUE
Pancreatic cancer	neoplasms	-0.6679	-2.663	1.327	1.018	-0.656	0.512784	0.0697387	3.76972	10	5541	10	2454	0.511647	0.832121	not_significant	-0.290065	0.29103	2.8607	2.599	3.122	0.133	21.449	0	-0.0512	-0.058	-0.045	0.003	-15.779	0	TRUE
Pancytopenia	hematopoietic	1.0233	0.129	1.917	0.456	2.243	2.78236	1.13769	6.80053	36	5515	10	2454	0.0248716	0.15752	not_significant	0.444414	1.6043	2.8613	2.599	3.123	0.134	21.416	0	-0.0514	-0.058	-0.045	0.003	-15.788	0	TRUE
Panniculitis	musculoskeletal	0.1428	-1.516	1.802	0.847	0.169	1.1535	0.219588	6.06176	10	5541	10	2454	0.866075	0.958318	not_significant	0.0620173	0.0624443	2.8611	2.6	3.122	0.133	21.451	0	-0.0512	-0.058	-0.045	0.003	-15.786	0	TRUE
Paralysis/spasm of vocal cords or larynx	respiratory	0.3568	-1.106	1.82	0.747	0.478	1.42875	0.33088	6.17186	10	5541	10	2454	0.632687	0.884687	not_significant	0.154956	0.198811	2.8622	2.601	3.124	0.133	21.461	0	-0.0513	-0.058	-0.045	0.003	-15.796	0	TRUE
Paralytic ileus	digestive	0.1106	-0.93	1.152	0.531	0.208	1.11695	0.394554	3.16452	13	5538	10	2454	0.835096	0.953959	not_significant	0.048033	0.0782637	2.8614	2.6	3.123	0.133	21.453	0	-0.0513	-0.058	-0.045	0.003	-15.787	0	TRUE
Paralytic strabismus	sense organs	0.7543	-0.889	2.398	0.838	0.9	2.12612	0.411067	11.0012	10	5541	10	2454	0.368336	0.712995	not_significant	0.327588	0.433755	2.8619	2.6	3.123	0.133	21.46	0	-0.0513	-0.058	-0.045	0.003	-15.798	0	TRUE
Paraproteinemia	endocrine/metabolic	-0.1807	-1.719	1.358	0.785	-0.23	0.834686	0.179245	3.88841	10	5541	10	2454	0.817922	0.953093	not_significant	-0.078477	0.087288	2.8605	2.599	3.122	0.133	21.443	0	-0.0512	-0.058	-0.045	0.003	-15.773	0	TRUE
Parapsoriasis	dermatologic	-0.0799	-2.588	2.428	1.279	-0.062	0.923209	0.0751702	11.3362	10	5541	10	2454	0.950185	0.985533	not_significant	-0.0347001	0.022192	2.8611	2.6	3.123	0.133	21.452	0	-0.0512	-0.058	-0.045	0.003	-15.785	0	TRUE
Parasomnia	neurological	-0.1505	-0.972	0.671	0.419	-0.359	0.860278	0.378326	1.95619	16	5535	10	2454	0.719512	0.908296	not_significant	-0.0653613	0.142962	2.8602	2.599	3.122	0.133	21.442	0	-0.0512	-0.058	-0.045	0.003	-15.768	0	TRUE
Parkinson's disease	neurological	-0.2581	-2.101	1.585	0.94	-0.274	0.772518	0.122334	4.87929	10	5541	10	2454	0.783703	0.93774	not_significant	-0.112091	0.105848	2.859	2.597	3.121	0.134	21.401	0	-0.0512	-0.058	-0.045	0.003	-15.736	0	TRUE
Paroxysmal supraventricular tachycardia	circulatory system	-0.4948	-1.247	0.257	0.384	-1.289	0.609693	0.287366	1.29305	16	5535	13	2451	0.197273	0.530643	not_significant	-0.214889	0.704932	2.8599	2.599	3.121	0.133	21.442	0	-0.0512	-0.058	-0.045	0.003	-15.758	0	TRUE
Paroxysmal tachycardia, unspecified	circulatory system	-0.504	-3.28	2.272	1.416	-0.356	0.604109	0.0376283	9.69878	10	5541	10	2454	0.721964	0.908296	not_significant	-0.218884	0.141484	2.8607	2.599	3.122	0.133	21.448	0	-0.0512	-0.058	-0.045	0.003	-15.78	0	TRUE
Paroxysmal ventricular tachycardia	circulatory system	-0.6076	-1.382	0.167	0.395	-1.537	0.544656	0.251076	1.18175	13	5538	14	2450	0.124198	0.421795	not_significant	-0.263877	0.905885	2.8549	2.593	3.116	0.133	21.391	0	-0.051	-0.057	-0.045	0.003	-15.703	0	TRUE
Partial epilepsy	neurological	-0.3887	-1.536	0.758	0.585	-0.664	0.677938	0.21524	2.134	10	5541	10	2454	0.506559	0.829862	not_significant	-0.16881	0.29537	2.8621	2.601	3.123	0.133	21.458	0	-0.0513	-0.058	-0.045	0.003	-15.787	0	TRUE
Pathologic fracture	musculoskeletal	0.8594	-1.376	3.095	1.141	0.754	2.36174	0.252587	22.0872	10	5541	10	2454	0.451137	0.788338	not_significant	0.373233	0.345691	2.8626	2.601	3.124	0.133	21.458	0	-0.0513	-0.058	-0.045	0.003	-15.795	0	TRUE
Pathologic fracture of vertebrae	musculoskeletal	0.6185	-1.014	2.251	0.833	0.743	1.85614	0.362765	9.49723	10	5541	10	2454	0.457779	0.792808	not_significant	0.268611	0.339344	2.8633	2.602	3.125	0.133	21.459	0	-0.0513	-0.058	-0.045	0.003	-15.798	0	TRUE
Pathological, developmental or recurrent dislocation	musculoskeletal	-1.3988	-2.424	-0.373	0.523	-2.674	0.246893	0.0885666	0.688665	10	5541	10	2454	0.00749661	0.0660643	not_significant	-0.607491	2.12514	2.8676	2.606	3.129	0.133	21.484	0	-0.0513	-0.058	-0.045	0.003	-15.802	0	TRUE
Pectus excavatum	congenital anomalies	-0.8946	-2.151	0.362	0.641	-1.395	0.408771	0.116368	1.4362	10	5541	10	2454	0.163003	0.481765	not_significant	-0.38852	0.787803	2.8637	2.602	3.125	0.133	21.467	0	-0.0513	-0.058	-0.045	0.003	-15.794	0	TRUE
Peptic ulcer, site unspecified	digestive	0.4447	-0.679	1.568	0.573	0.776	1.56002	0.507124	4.79704	14	5537	10	2454	0.437816	0.777545	not_significant	0.193131	0.358709	2.8602	2.599	3.122	0.133	21.444	0	-0.0512	-0.058	-0.045	0.003	-15.785	0	TRUE
Perforation of tympanic membrane	sense organs	-0.4991	-1.503	0.505	0.512	-0.975	0.607077	0.222462	1.65699	10	5541	10	2454	0.32979	0.67828	not_significant	-0.216756	0.481762	2.8613	2.6	3.123	0.133	21.452	0	-0.0512	-0.058	-0.045	0.003	-15.778	0	TRUE
Periapical abscess	digestive	-0.5352	-1.676	0.606	0.582	-0.92	0.585552	0.187121	1.83308	10	5541	10	2454	0.35782	0.702149	not_significant	-0.232434	0.446335	2.8607	2.599	3.122	0.133	21.442	0	-0.0512	-0.058	-0.045	0.003	-15.769	0	TRUE
Pericarditis	circulatory system	0.1498	-0.698	0.997	0.432	0.346	1.1616	0.497579	2.71014	20	5531	10	2454	0.729022	0.908296	not_significant	0.0650573	0.137259	2.861	2.6	3.122	0.133	21.45	0	-0.0513	-0.058	-0.045	0.003	-15.787	0	TRUE
Peripheral autonomic neuropathy	neurological	-1.3246	-4.156	1.507	1.445	-0.917	0.265909	0.0156701	4.51317	10	5541	10	2454	0.359196	0.702546	not_significant	-0.575266	0.444668	2.8637	2.602	3.125	0.133	21.465	0	-0.0513	-0.058	-0.045	0.003	-15.799	0	TRUE
Peripheral enthesopathies and allied syndromes	musculoskeletal	-0.6165	-0.886	-0.347	0.138	-4.479	0.539831	0.412302	0.706805	115	5436	114	2350	7.50268e-06	0.000224518	con_significant	-0.267743	5.12478	2.8239	2.562	3.086	0.134	21.133	0	-0.0498	-0.056	-0.043	0.003	-15.277	0	TRUE
Peripheral or central vertigo	sense organs	-0.2985	-0.822	0.225	0.267	-1.118	0.74193	0.439552	1.25232	35	5516	25	2439	0.263609	0.610329	not_significant	-0.129637	0.579039	2.8576	2.596	3.119	0.133	21.422	0	-0.0511	-0.057	-0.045	0.003	-15.729	0	TRUE
Peripheral retinal degenerations	sense organs	-0.4419	-1.329	0.445	0.452	-0.977	0.642814	0.264742	1.56049	12	5539	10	2454	0.328799	0.677406	not_significant	-0.191915	0.483069	2.8609	2.599	3.122	0.133	21.449	0	-0.0512	-0.058	-0.045	0.003	-15.772	0	TRUE
Peripheral vascular disease, unspecified	circulatory system	-0.1774	-1.146	0.791	0.494	-0.359	0.837445	0.317906	2.2056	10	5541	10	2454	0.719696	0.908296	not_significant	-0.0770438	0.142851	2.8592	2.598	3.121	0.133	21.419	0	-0.0512	-0.058	-0.045	0.003	-15.746	0	TRUE
Peritoneal adhesions (postoperative) (postinfection)	digestive	0.0287	-1.081	1.138	0.566	0.051	1.02912	0.339256	3.12052	10	5541	10	2454	0.959603	0.990384	not_significant	0.0124643	0.0179084	2.8612	2.6	3.123	0.133	21.451	0	-0.0512	-0.058	-0.045	0.003	-15.783	0	TRUE
Peritoneal or intestinal adhesions	digestive	-0.7673	-2.819	1.284	1.047	-0.733	0.464265	0.0596656	3.61106	10	5541	10	2454	0.46353	0.793771	not_significant	-0.333234	0.333922	2.8612	2.6	3.123	0.133	21.45	0	-0.0512	-0.058	-0.045	0.003	-15.781	0	TRUE
Peritonitis and retroperitoneal infections	digestive	0.1447	-0.741	1.031	0.452	0.32	1.15569	0.476637	2.80387	17	5534	10	2454	0.748852	0.91749	not_significant	0.0628424	0.125604	2.8618	2.6	3.123	0.133	21.456	0	-0.0513	-0.058	-0.045	0.003	-15.789	0	TRUE
Pernicious anemia	hematopoietic	-0.9653	-3.796	1.865	1.444	-0.668	0.380869	0.0224604	6.45594	10	5541	10	2454	0.50391	0.829684	not_significant	-0.419224	0.297647	2.8619	2.6	3.123	0.133	21.456	0	-0.0513	-0.058	-0.045	0.003	-15.789	0	TRUE
Persistent vomiting		-0.3333	-2.771	2.105	1.244	-0.268	0.716555	0.0625994	8.2071	10	5541	10	2454	0.788709	0.94126	not_significant	-0.14475	0.103083	2.8616	2.6	3.123	0.133	21.453	0	-0.0513	-0.058	-0.045	0.003	-15.787	0	TRUE
Persons with potential health hazards related to socioeconomic, psychosocial, and other circumstances		-0.5822	-1.146	-0.019	0.287	-2.026	0.558668	0.317906	0.981179	28	5523	24	2440	0.0427746	0.22822	not_significant	-0.252846	1.36881	2.8605	2.599	3.122	0.133	21.44	0	-0.0511	-0.057	-0.045	0.003	-15.742	0	TRUE
Pervasive developmental disorders	mental disorders	-0.5353	-1.345	0.275	0.413	-1.296	0.585494	0.26054	1.31653	15	5536	10	2454	0.195147	0.527179	not_significant	-0.232478	0.709638	2.866	2.604	3.128	0.133	21.475	0	-0.0513	-0.058	-0.045	0.003	-15.804	0	TRUE
Peyronie's disease	genitourinary	-0.2153	-1.219	0.788	0.512	-0.421	0.8063	0.295526	2.19899	10	5541	10	2454	0.674102	0.903995	not_significant	-0.0935036	0.171274	2.8576	2.596	3.12	0.134	21.386	0	-0.0511	-0.058	-0.045	0.003	-15.715	0	TRUE
Phlebitis and thrombophlebitis	circulatory system	-0.0802	-1.092	0.932	0.516	-0.155	0.922932	0.335545	2.53958	11	5540	10	2454	0.876477	0.958318	not_significant	-0.0348304	0.0572597	2.8606	2.599	3.122	0.133	21.441	0	-0.0512	-0.058	-0.045	0.003	-15.771	0	TRUE
Phlebitis and thrombophlebitis of lower extremities	circulatory system	-0.0586	-1.79	1.673	0.883	-0.066	0.943084	0.16696	5.32813	10	5541	10	2454	0.947094	0.985533	not_significant	-0.0254497	0.0236067	2.8611	2.6	3.123	0.133	21.452	0	-0.0512	-0.058	-0.045	0.003	-15.785	0	TRUE
Phobia	mental disorders	-0.698	-1.595	0.199	0.458	-1.525	0.497579	0.202909	1.22018	11	5540	10	2454	0.127227	0.42352	not_significant	-0.303138	0.89542	2.865	2.603	3.126	0.133	21.475	0	-0.0513	-0.058	-0.045	0.003	-15.799	0	TRUE
Pilonidal cyst	dermatologic	-0.3272	-1.278	0.624	0.485	-0.674	0.72094	0.278594	1.86638	12	5539	10	2454	0.500234	0.828189	not_significant	-0.142101	0.300827	2.8624	2.601	3.124	0.133	21.459	0	-0.0513	-0.058	-0.045	0.003	-15.789	0	TRUE
Pituitary hyperfunction	endocrine/metabolic	1.3473	-0.119	2.813	0.748	1.802	3.84702	0.887808	16.6598	19	5532	10	2454	0.0716227	0.315588	not_significant	0.585125	1.14495	2.8556	2.594	3.117	0.133	21.405	0	-0.0512	-0.058	-0.045	0.003	-15.758	0	TRUE
Pituitary hypofunction	endocrine/metabolic	3.2505	1.226	5.275	1.033	3.146	25.8032	3.40757	195.39	41	5510	10	2454	0.00165374	0.0197952	mi_significant	1.41167	2.78153	2.8833	2.62	3.146	0.134	21.494	0	-0.052	-0.058	-0.046	0.003	-15.916	0	TRUE
Pityriasis	dermatologic	-0.3971	-1.839	1.045	0.736	-0.54	0.672267	0.158976	2.8434	10	5541	10	2454	0.589364	0.866265	not_significant	-0.172458	0.229616	2.8621	2.601	3.124	0.133	21.456	0	-0.0513	-0.058	-0.045	0.003	-15.789	0	TRUE
Pleurisy; pleural effusion	respiratory	0.121	-0.376	0.618	0.254	0.477	1.12862	0.686602	1.85521	55	5496	26	2438	0.633279	0.884687	not_significant	0.0525496	0.198405	2.8631	2.602	3.125	0.133	21.456	0	-0.0513	-0.058	-0.045	0.003	-15.79	0	TRUE
Plica syndrome	musculoskeletal	-0.4479	-1.667	0.771	0.622	-0.72	0.638969	0.188813	2.16193	10	5541	10	2454	0.471307	0.799085	not_significant	-0.19452	0.326696	2.8599	2.598	3.121	0.133	21.444	0	-0.0512	-0.058	-0.045	0.003	-15.769	0	TRUE
Pneumococcal pneumonia	respiratory	-1.0404	-2.418	0.337	0.703	-1.481	0.353313	0.0890996	1.40074	10	5541	10	2454	0.13873	0.44269	not_significant	-0.45184	0.857828	2.8626	2.601	3.124	0.133	21.449	0	-0.0513	-0.058	-0.045	0.003	-15.777	0	TRUE
Pneumonia	respiratory	-0.1964	-0.579	0.186	0.195	-1.006	0.821683	0.560459	1.20442	79	5472	44	2420	0.314256	0.665779	not_significant	-0.0852954	0.502716	2.8623	2.601	3.124	0.133	21.462	0	-0.0512	-0.058	-0.045	0.003	-15.771	0	TRUE
Pneumonitis due to inhalation of food or vomitus	respiratory	-2.1798	-3.774	-0.585	0.813	-2.68	0.113064	0.02296	0.557106	10	5541	10	2454	0.00736901	0.0658262	not_significant	-0.946675	2.13259	2.8673	2.606	3.129	0.133	21.484	0	-0.0513	-0.058	-0.045	0.003	-15.804	0	TRUE
Poisoning by agents primarily affecting the cardiovascular system	injuries & poisonings	0.3761	-1.954	2.706	1.189	0.316	1.45659	0.141706	14.9693	10	5541	10	2454	0.75174	0.918196	not_significant	0.163338	0.123932	2.8612	2.6	3.123	0.133	21.452	0	-0.0513	-0.058	-0.045	0.003	-15.786	0	TRUE
Poisoning by antibiotics	injuries & poisonings	-0.5809	-3.353	2.192	1.415	-0.411	0.559395	0.0349793	8.9531	10	5541	10	2454	0.681352	0.906198	not_significant	-0.252282	0.166629	2.8608	2.599	3.122	0.133	21.449	0	-0.0512	-0.058	-0.045	0.003	-15.781	0	TRUE
Poisoning by other anti-infectives	injuries & poisonings	0.5514	-1.896	2.999	1.249	0.442	1.73568	0.150168	20.0655	10	5541	10	2454	0.658792	0.897127	not_significant	0.23947	0.181251	2.8618	2.6	3.123	0.133	21.455	0	-0.0513	-0.058	-0.045	0.003	-15.79	0	TRUE
Poisoning by psychotropic agents	injuries & poisonings	-0.7859	-3.597	2.025	1.434	-0.548	0.455709	0.0274058	7.57611	10	5541	10	2454	0.583705	0.863914	not_significant	-0.341312	0.233807	2.8613	2.6	3.123	0.133	21.453	0	-0.0512	-0.058	-0.045	0.003	-15.785	0	TRUE
Polyarteritis nodosa	circulatory system	0.7283	-1.549	3.006	1.162	0.627	2.07156	0.21246	20.2064	10	5541	10	2454	0.53081	0.843627	not_significant	0.316297	0.275061	2.863	2.601	3.124	0.133	21.459	0	-0.0513	-0.058	-0.045	0.003	-15.795	0	TRUE
Polycythemia vera	neoplasms	-0.0371	-1.763	1.688	0.88	-0.042	0.96358	0.17153	5.40865	10	5541	10	2454	0.9664	0.991243	not_significant	-0.0161123	0.0148431	2.8611	2.6	3.123	0.133	21.452	0	-0.0512	-0.058	-0.045	0.003	-15.785	0	TRUE
Polycythemia, secondary	hematopoietic	-0.3061	-1.347	0.735	0.531	-0.576	0.736313	0.260019	2.08548	10	5541	10	2454	0.564449	0.856332	not_significant	-0.132938	0.248375	2.8617	2.6	3.123	0.133	21.455	0	-0.0512	-0.058	-0.045	0.003	-15.785	0	TRUE
Polydipsia	endocrine/metabolic	1.0438	-1.346	3.433	1.219	0.856	2.83999	0.260279	30.9694	10	5541	10	2454	0.391867	0.737861	not_significant	0.453317	0.406862	2.8637	2.602	3.125	0.133	21.466	0	-0.0513	-0.058	-0.045	0.003	-15.804	0	TRUE
Polyneuropathy due to drugs	mental disorders	1.3429	-0.757	3.442	1.071	1.254	3.83013	0.469072	31.2494	10	5541	10	2454	0.21	0.550044	not_significant	0.583214	0.677781	2.8614	2.6	3.123	0.133	21.447	0	-0.0513	-0.058	-0.045	0.003	-15.79	0	TRUE
Polyneuropathy in diabetes	endocrine/metabolic	2.1868	0.114	4.26	1.058	2.068	8.90667	1.12075	70.81	10	5541	10	2454	0.0386788	0.213558	not_significant	0.949715	1.41253	2.8813	2.619	3.143	0.134	21.536	0	-0.0518	-0.058	-0.045	0.003	-15.901	0	TRUE
Portal hypertension	digestive	-0.398	-1.62	0.824	0.623	-0.638	0.671662	0.197899	2.2796	10	5541	10	2454	0.523232	0.840683	not_significant	-0.172849	0.281306	2.8597	2.598	3.121	0.133	21.44	0	-0.0512	-0.058	-0.045	0.003	-15.766	0	TRUE
Postinflammatory pulmonary fibrosis	respiratory	0.2247	-0.958	1.407	0.603	0.372	1.25195	0.383659	4.08369	10	5541	10	2454	0.709528	0.908296	not_significant	0.097586	0.14903	2.8614	2.6	3.123	0.133	21.453	0	-0.0513	-0.058	-0.045	0.003	-15.788	0	TRUE
Postnasal drip	respiratory	-0.0915	-0.523	0.34	0.22	-0.415	0.912561	0.59274	1.40495	64	5487	33	2431	0.677881	0.904986	not_significant	-0.0397379	0.168847	2.8614	2.6	3.123	0.133	21.453	0	-0.0512	-0.058	-0.045	0.003	-15.776	0	TRUE
Postoperative infection	infectious diseases	-0.4024	-1.231	0.426	0.423	-0.952	0.668713	0.292	1.53112	15	5536	10	2454	0.341006	0.6895	not_significant	-0.17476	0.467238	2.8622	2.601	3.124	0.133	21.457	0	-0.0512	-0.058	-0.045	0.003	-15.782	0	TRUE
Postoperative shock	injuries & poisonings	-0.299	-3.204	2.606	1.482	-0.202	0.741559	0.0405995	13.5448	10	5541	10	2454	0.840114	0.954762	not_significant	-0.129854	0.075662	2.8606	2.599	3.122	0.133	21.445	0	-0.0512	-0.058	-0.045	0.003	-15.777	0	TRUE
Postprocedural fever	symptoms	-0.3479	-1.8	1.105	0.741	-0.469	0.706169	0.165299	3.01922	10	5541	10	2454	0.638808	0.885289	not_significant	-0.151091	0.19463	2.8617	2.6	3.123	0.133	21.455	0	-0.0513	-0.058	-0.045	0.003	-15.787	0	TRUE
Posttraumatic stress disorder	mental disorders	-0.9815	-1.691	-0.272	0.362	-2.712	0.374749	0.184335	0.761854	15	5536	18	2446	0.00667889	0.0610277	not_significant	-0.42626	2.1753	2.8644	2.603	3.126	0.134	21.452	0	-0.0512	-0.058	-0.045	0.003	-15.759	0	TRUE
Posttraumatic wound infection not elsewhere classified		-0.8469	-2.106	0.412	0.642	-1.319	0.428742	0.121724	1.50983	10	5541	10	2454	0.187259	0.523714	not_significant	-0.367804	0.727556	2.8628	2.601	3.124	0.133	21.462	0	-0.0513	-0.058	-0.045	0.003	-15.788	0	TRUE
potential health hazards related to communicable diseases potential health hazards related to communicable diseases		0.9499	-0.644	2.544	0.813	1.168	2.58545	0.525187	12.7305	10	5541	10	2454	0.242673	0.587763	not_significant	0.412536	0.614978	2.8657	2.604	3.127	0.133	21.469	0	-0.0514	-0.058	-0.045	0.003	-15.813	0	TRUE
Precordial pain	circulatory system	-0.1444	-0.63	0.342	0.248	-0.582	0.865541	0.532592	1.40776	45	5506	28	2436	0.560326	0.85332	not_significant	-0.0627121	0.25156	2.8587	2.597	3.12	0.133	21.426	0	-0.0512	-0.058	-0.045	0.003	-15.738	0	TRUE
Premature beats	circulatory system	-0.536	-1.072	0	0.274	-1.959	0.585084	0.342323	1	28	5523	30	2434	0.0501639	0.252242	not_significant	-0.232782	1.29961	2.8453	2.583	3.107	0.134	21.285	0	-0.0507	-0.057	-0.044	0.003	-15.575	0	TRUE
Presbyopia	sense organs	-0.2637	-0.776	0.249	0.261	-1.009	0.768204	0.460243	1.28274	33	5518	29	2435	0.31309	0.664672	not_significant	-0.114523	0.504331	2.8503	2.588	3.113	0.134	21.306	0	-0.0509	-0.057	-0.045	0.003	-15.61	0	TRUE
Primary hypercoagulable state	hematopoietic	-0.5002	-1.594	0.593	0.558	-0.897	0.606409	0.203112	1.80941	10	5541	10	2454	0.369971	0.714283	not_significant	-0.217234	0.431832	2.8613	2.6	3.123	0.133	21.457	0	-0.0512	-0.058	-0.045	0.003	-15.782	0	TRUE
Primary open angle glaucoma	sense organs	0.7158	-1.158	2.589	0.956	0.749	2.04582	0.314114	13.3164	10	5541	10	2454	0.453932	0.790912	not_significant	0.310868	0.343009	2.8661	2.604	3.128	0.134	21.465	0	-0.0514	-0.058	-0.045	0.003	-15.805	0	TRUE
Primary pulmonary hypertension	circulatory system	0.4991	-1.226	2.224	0.88	0.567	1.64724	0.293464	9.24423	10	5541	10	2454	0.570609	0.858101	not_significant	0.216756	0.243661	2.8629	2.601	3.124	0.133	21.459	0	-0.0513	-0.058	-0.045	0.003	-15.795	0	TRUE
Primary thrombocytopenia	hematopoietic	-0.1596	-0.999	0.68	0.428	-0.373	0.852485	0.368248	1.97388	16	5535	10	2454	0.709343	0.908296	not_significant	-0.0693134	0.149144	2.8611	2.6	3.122	0.133	21.451	0	-0.0512	-0.058	-0.045	0.003	-15.78	0	TRUE
Primary/intrinsic cardiomyopathies	circulatory system	-0.5391	-1.164	0.085	0.319	-1.692	0.583273	0.312235	1.08872	24	5527	20	2444	0.0907014	0.368032	not_significant	-0.234128	1.04239	2.8604	2.599	3.122	0.133	21.429	0	-0.0512	-0.058	-0.045	0.003	-15.74	0	TRUE
Progressive myopia	sense organs	0.8632	-0.41	2.136	0.649	1.329	2.37073	0.66365	8.46551	14	5537	10	2454	0.183751	0.519975	not_significant	0.374883	0.735771	2.8625	2.601	3.124	0.133	21.455	0	-0.0513	-0.058	-0.045	0.003	-15.801	0	TRUE
Prostatitis	genitourinary	0.6051	-0.126	1.336	0.373	1.622	1.83144	0.881615	3.8038	32	5519	10	2454	0.104782	0.390345	not_significant	0.262792	0.979711	2.8684	2.607	3.13	0.134	21.483	0	-0.0515	-0.058	-0.045	0.003	-15.838	0	TRUE
Protein-calorie malnutrition	endocrine/metabolic	1.1014	-0.121	2.324	0.624	1.766	3.00837	0.886034	10.2165	23	5528	10	2454	0.0773584	0.333741	not_significant	0.478332	1.11149	2.8548	2.593	3.116	0.133	21.389	0	-0.0512	-0.058	-0.045	0.003	-15.747	0	TRUE
Proteinuria	endocrine/metabolic	0.413	-0.205	1.031	0.316	1.309	1.51135	0.814647	2.80387	43	5508	14	2450	0.190597	0.526605	not_significant	0.179364	0.719884	2.8622	2.601	3.124	0.133	21.455	0	-0.0513	-0.058	-0.045	0.003	-15.807	0	TRUE
Prurigo and Lichen	dermatologic	0.0637	-0.498	0.625	0.286	0.222	1.06577	0.607745	1.86825	43	5508	18	2446	0.82404	0.953093	not_significant	0.0276646	0.0840516	2.8607	2.599	3.122	0.133	21.446	0	-0.0512	-0.058	-0.045	0.003	-15.785	0	TRUE
Pruritus and related conditions	dermatologic	-0.0942	-0.44	0.251	0.176	-0.535	0.910101	0.644036	1.28531	101	5450	52	2412	0.592813	0.866265	not_significant	-0.0409105	0.227082	2.8615	2.6	3.123	0.133	21.455	0	-0.0512	-0.058	-0.045	0.003	-15.771	0	TRUE
Psoriasis	dermatologic	-0.0066	-2.462	2.449	1.253	-0.005	0.993422	0.0852643	11.5768	10	5541	10	2454	0.995822	0.998476	not_significant	-0.00286634	0.0018181	2.8611	2.6	3.123	0.133	21.452	0	-0.0512	-0.058	-0.045	0.003	-15.785	0	TRUE
Psoriasis vulgaris	dermatologic	-0.0379	-0.495	0.42	0.233	-0.162	0.962809	0.609571	1.52196	57	5494	29	2435	0.871071	0.958318	not_significant	-0.0164598	0.0599465	2.861	2.6	3.122	0.133	21.451	0	-0.0512	-0.058	-0.045	0.003	-15.776	0	TRUE
Psoriatic arthropathy	dermatologic	-0.1922	-1.207	0.822	0.518	-0.371	0.825142	0.299093	2.27505	10	5541	10	2454	0.710346	0.908296	not_significant	-0.0834714	0.14853	2.8594	2.598	3.121	0.133	21.427	0	-0.0512	-0.058	-0.045	0.003	-15.754	0	TRUE
Psychogenic disorder	mental disorders	-0.6235	-1.463	0.216	0.428	-1.455	0.536065	0.231541	1.2411	12	5539	11	2453	0.145543	0.455877	not_significant	-0.270783	0.837008	2.8603	2.599	3.122	0.133	21.442	0	-0.0512	-0.058	-0.045	0.003	-15.76	0	TRUE
Psychosis	mental disorders	-0.3811	-2.123	1.361	0.889	-0.429	0.68311	0.119672	3.90009	10	5541	10	2454	0.668029	0.9015	not_significant	-0.16551	0.175205	2.8622	2.601	3.124	0.133	21.456	0	-0.0513	-0.058	-0.045	0.003	-15.79	0	TRUE
Ptosis of eyelid	sense organs	-0.5737	-1.743	0.596	0.597	-0.962	0.563437	0.174995	1.81484	10	5541	10	2454	0.336249	0.685553	not_significant	-0.249155	0.473338	2.8631	2.602	3.125	0.133	21.464	0	-0.0513	-0.058	-0.045	0.003	-15.793	0	TRUE
Pulmonary collapse; interstitial and compensatory emphysema	respiratory	-0.0974	-0.683	0.489	0.299	-0.326	0.907193	0.505099	1.63068	37	5514	18	2446	0.744609	0.91749	not_significant	-0.0423003	0.128072	2.8617	2.6	3.123	0.133	21.455	0	-0.0512	-0.058	-0.045	0.003	-15.785	0	TRUE
Pulmonary congestion and hypostasis	respiratory	0.0797	-0.988	1.147	0.545	0.146	1.08296	0.372321	3.14873	11	5540	10	2454	0.883584	0.959426	not_significant	0.0346133	0.0537521	2.8616	2.6	3.123	0.133	21.45	0	-0.0513	-0.058	-0.045	0.003	-15.782	0	TRUE
Pulmonary embolism and infarction, acute	circulatory system	0.2208	-0.752	1.193	0.496	0.445	1.24707	0.471423	3.29696	16	5535	10	2454	0.656355	0.894826	not_significant	0.0958922	0.182861	2.861	2.6	3.122	0.133	21.451	0	-0.0513	-0.058	-0.045	0.003	-15.788	0	TRUE
Pulmonary insufficiency or respiratory failure following trauma and surgery	respiratory	-1.1593	-2.387	0.068	0.626	-1.851	0.313706	0.091905	1.07037	10	5541	10	2454	0.0641273	0.297521	not_significant	-0.503478	1.19296	2.8659	2.604	3.127	0.133	21.481	0	-0.0513	-0.058	-0.045	0.003	-15.806	0	TRUE
Pyelonephritis	genitourinary	-0.0358	-1.412	1.341	0.702	-0.051	0.964833	0.243655	3.82286	10	5541	10	2454	0.959367	0.990384	not_significant	-0.0155477	0.0180153	2.8612	2.6	3.123	0.133	21.451	0	-0.0512	-0.058	-0.045	0.003	-15.785	0	TRUE
Pyoderma	dermatologic	-0.3246	-3.1	2.45	1.416	-0.229	0.722816	0.0450492	11.5883	10	5541	10	2454	0.81863	0.953093	not_significant	-0.140972	0.0869123	2.8606	2.599	3.122	0.133	21.445	0	-0.0512	-0.058	-0.045	0.003	-15.777	0	TRUE
Pyogenic arthritis	musculoskeletal	1.8139	-0.325	3.952	1.091	1.662	6.13432	0.722527	52.0393	10	5541	10	2454	0.0964254	0.375965	not_significant	0.787767	1.01581	2.8737	2.612	3.136	0.134	21.5	0	-0.0516	-0.058	-0.045	0.003	-15.854	0	TRUE
Pyogenic granuloma	dermatologic	0.7039	-1.478	2.885	1.113	0.632	2.02162	0.228093	17.9036	10	5541	10	2454	0.527104	0.841631	not_significant	0.3057	0.278103	2.8603	2.599	3.122	0.133	21.443	0	-0.0512	-0.058	-0.045	0.003	-15.78	0	TRUE
Qualitative platelet defects	hematopoietic	-1.784	-4.075	0.507	1.169	-1.526	0.167965	0.0169922	1.6603	10	5541	10	2454	0.126916	0.42352	not_significant	-0.774781	0.896482	2.8603	2.599	3.122	0.133	21.445	0	-0.0512	-0.058	-0.045	0.003	-15.771	0	TRUE
Rash and other nonspecific skin eruption	dermatologic	-0.3117	-0.541	-0.082	0.117	-2.665	0.732201	0.582166	0.921272	210	5341	130	2334	0.00769627	0.0672441	not_significant	-0.13537	2.11372	2.8669	2.605	3.128	0.133	21.494	0	-0.051	-0.057	-0.045	0.003	-15.723	0	TRUE
Raynaud's syndrome	circulatory system	-0.4204	-1.749	0.908	0.678	-0.62	0.656784	0.173948	2.47936	10	5541	10	2454	0.535187	0.84403	not_significant	-0.182577	0.271494	2.8605	2.599	3.122	0.133	21.447	0	-0.0512	-0.058	-0.045	0.003	-15.775	0	TRUE
Redundant prepuce and phimosis/BXO	genitourinary	0.5253	-0.145	1.195	0.342	1.537	1.69097	0.865022	3.30356	44	5507	11	2453	0.124392	0.421795	not_significant	0.228135	0.905207	2.8557	2.594	3.117	0.133	21.404	0	-0.0512	-0.058	-0.045	0.003	-15.766	0	TRUE
Reflux esophagitis	digestive	-0.3182	-0.795	0.158	0.243	-1.309	0.727457	0.451581	1.17117	45	5506	31	2433	0.190677	0.526605	not_significant	-0.138193	0.719702	2.8588	2.597	3.12	0.133	21.428	0	-0.0511	-0.057	-0.045	0.003	-15.731	0	TRUE
Regional enteritis	digestive	-0.0287	-0.685	0.628	0.335	-0.086	0.971708	0.50409	1.87386	29	5522	14	2450	0.931692	0.978277	not_significant	-0.0124643	0.0307275	2.8611	2.6	3.123	0.133	21.452	0	-0.0512	-0.058	-0.045	0.003	-15.783	0	TRUE
Reiter's disease	musculoskeletal	-1.6829	-4.094	0.728	1.23	-1.368	0.185834	0.0166724	2.07093	10	5541	10	2454	0.171312	0.495315	not_significant	-0.730874	0.766213	2.8637	2.602	3.125	0.133	21.465	0	-0.0513	-0.058	-0.045	0.003	-15.796	0	TRUE
Renal colic	genitourinary	-0.7347	-1.575	0.105	0.429	-1.715	0.479649	0.207008	1.11071	11	5540	13	2451	0.0864226	0.355491	not_significant	-0.319076	1.06337	2.8557	2.594	3.117	0.133	21.391	0	-0.0511	-0.057	-0.045	0.003	-15.705	0	TRUE
Renal failure NOS	genitourinary	1.3436	-0.28	2.967	0.828	1.622	3.83282	0.755784	19.4335	10	5541	10	2454	0.10473	0.390345	not_significant	0.583518	0.97993	2.8717	2.61	3.134	0.134	21.49	0	-0.0515	-0.058	-0.045	0.003	-15.843	0	TRUE
Renal sclerosis, NOS	genitourinary	0.9999	-1.084	3.084	1.063	0.94	2.71801	0.33824	21.8456	10	5541	10	2454	0.346973	0.693183	not_significant	0.434251	0.459704	2.8574	2.596	3.119	0.133	21.419	0	-0.0512	-0.058	-0.045	0.003	-15.761	0	TRUE
Respiratory abnormalities	respiratory	-0.0367	-1.464	1.39	0.728	-0.05	0.963965	0.231309	4.01485	10	5541	10	2454	0.959761	0.990384	not_significant	-0.0159386	0.0178367	2.8611	2.6	3.123	0.133	21.452	0	-0.0512	-0.058	-0.045	0.003	-15.785	0	TRUE
Respiratory failure	respiratory	0.0016	-0.842	0.845	0.43	0.004	1.0016	0.430848	2.32798	18	5533	10	2454	0.99704	0.998665	not_significant	0.000694871	0.00128731	2.8611	2.6	3.123	0.133	21.451	0	-0.0512	-0.058	-0.045	0.003	-15.782	0	TRUE
Respiratory insufficiency	respiratory	1.108	-1.308	3.524	1.233	0.899	3.0283	0.27036	33.9198	10	5541	10	2454	0.368708	0.712995	not_significant	0.481198	0.433317	2.8624	2.601	3.124	0.133	21.463	0	-0.0513	-0.058	-0.045	0.003	-15.8	0	TRUE
Restless legs syndrome	neurological	-0.3317	-1.032	0.369	0.357	-0.928	0.717703	0.356294	1.44629	20	5531	14	2450	0.353232	0.696571	not_significant	-0.144055	0.45194	2.8602	2.599	3.122	0.133	21.442	0	-0.0512	-0.058	-0.045	0.003	-15.762	0	TRUE
Retention of urine	genitourinary	0.1533	-0.396	0.703	0.28	0.547	1.16567	0.673007	2.0198	41	5510	22	2442	0.584437	0.863914	not_significant	0.0665773	0.233262	2.8657	2.604	3.128	0.134	21.441	0	-0.0514	-0.058	-0.045	0.003	-15.776	0	TRUE
Retinal detachment with retinal defect	sense organs	0.112	-1.356	1.58	0.749	0.15	1.11851	0.257689	4.85496	10	5541	10	2454	0.881108	0.958806	not_significant	0.048641	0.0549707	2.8617	2.6	3.123	0.133	21.447	0	-0.0513	-0.058	-0.045	0.003	-15.781	0	TRUE
Retinal detachments and defects	sense organs	0.5525	-0.452	1.557	0.512	1.078	1.73759	0.636354	4.74457	19	5532	10	2454	0.280944	0.630939	not_significant	0.239948	0.55138	2.8603	2.599	3.122	0.133	21.443	0	-0.0513	-0.058	-0.045	0.003	-15.788	0	TRUE
Retinal edema	sense organs	-0.8402	-2.705	1.024	0.951	-0.883	0.431624	0.0668703	2.78431	10	5541	10	2454	0.377084	0.722191	not_significant	-0.364894	0.423562	2.8587	2.597	3.12	0.133	21.427	0	-0.0512	-0.058	-0.045	0.003	-15.755	0	TRUE
Retinal hemorrhage/ischemia	sense organs	0.8945	-0.431	2.22	0.676	1.323	2.44611	0.649859	9.20733	11	5540	10	2454	0.185918	0.522402	not_significant	0.388476	0.73068	2.8681	2.606	3.13	0.134	21.473	0	-0.0515	-0.058	-0.045	0.003	-15.822	0	TRUE
Retinal vascular changes and abnomalities	sense organs	-0.2405	-1.779	1.298	0.785	-0.306	0.786235	0.168807	3.66197	10	5541	10	2454	0.759286	0.92077	not_significant	-0.104448	0.119595	2.8604	2.599	3.122	0.133	21.444	0	-0.0512	-0.058	-0.045	0.003	-15.775	0	TRUE
Rhabdomyolysis	symptoms	-0.5366	-2.174	1.1	0.835	-0.642	0.584733	0.113722	3.00417	10	5541	10	2454	0.52056	0.840258	not_significant	-0.233042	0.283529	2.8599	2.598	3.121	0.133	21.44	0	-0.0512	-0.058	-0.045	0.003	-15.769	0	TRUE
Rheumatoid arthritis	musculoskeletal	0.0352	-1.374	1.444	0.719	0.049	1.03583	0.253093	4.23761	10	5541	10	2454	0.960997	0.990384	not_significant	0.0152872	0.0172779	2.8612	2.6	3.123	0.133	21.452	0	-0.0512	-0.058	-0.045	0.003	-15.784	0	TRUE
Rheumatoid arthritis and other inflammatory polyarthropathies	musculoskeletal	0.5837	-0.448	1.615	0.526	1.109	1.79266	0.638905	5.02789	15	5536	10	2454	0.267345	0.615169	not_significant	0.253498	0.572928	2.8655	2.604	3.127	0.133	21.468	0	-0.0514	-0.058	-0.045	0.003	-15.812	0	TRUE
Right bundle branch block	circulatory system	-0.7082	-1.547	0.131	0.428	-1.655	0.49253	0.212886	1.13997	11	5540	13	2451	0.0979293	0.379596	not_significant	-0.307567	1.00909	2.8547	2.593	3.116	0.133	21.387	0	-0.051	-0.057	-0.045	0.003	-15.699	0	TRUE
Rosacea	dermatologic	-0.341	-0.871	0.189	0.27	-1.262	0.711059	0.418533	1.20804	33	5518	26	2438	0.207111	0.54722	not_significant	-0.148094	0.683796	2.8548	2.593	3.116	0.133	21.393	0	-0.051	-0.057	-0.045	0.003	-15.695	0	TRUE
Rotator cuff (capsule) sprain		0.3845	-0.702	1.471	0.554	0.693	1.46888	0.495593	4.35359	11	5540	10	2454	0.488009	0.814651	not_significant	0.166986	0.311572	2.8647	2.603	3.126	0.133	21.46	0	-0.0514	-0.058	-0.045	0.003	-15.798	0	TRUE
Rupture of synovium	musculoskeletal	-1.1826	-2.423	0.058	0.633	-1.869	0.306481	0.0886553	1.05971	10	5541	10	2454	0.0616312	0.289304	not_significant	-0.513597	1.2102	2.8583	2.597	3.12	0.133	21.429	0	-0.0511	-0.057	-0.045	0.003	-15.747	0	TRUE
Rupture of tendon, nontraumatic	musculoskeletal	-0.232	-0.997	0.533	0.39	-0.595	0.792946	0.368985	1.70404	17	5534	12	2452	0.552098	0.849983	not_significant	-0.100756	0.257984	2.859	2.598	3.121	0.133	21.43	0	-0.0512	-0.058	-0.045	0.003	-15.752	0	TRUE
Sacroiliitis NEC	musculoskeletal	-0.5812	-1.586	0.423	0.512	-1.134	0.559227	0.204743	1.52653	10	5541	10	2454	0.256747	0.601421	not_significant	-0.252412	0.590495	2.8627	2.601	3.124	0.133	21.461	0	-0.0513	-0.058	-0.045	0.003	-15.787	0	TRUE
Sarcoidosis	dermatologic	0.7584	-0.821	2.338	0.806	0.941	2.13486	0.439991	10.3605	10	5541	10	2454	0.346672	0.693183	not_significant	0.329369	0.460082	2.8638	2.602	3.125	0.133	21.465	0	-0.0513	-0.058	-0.045	0.003	-15.804	0	TRUE
Scar conditions and fibrosis of skin	dermatologic	-0.6275	-1.009	-0.246	0.195	-3.222	0.533925	0.364583	0.781922	60	5491	53	2411	0.00127387	0.0158297	con_significant	-0.27252	2.89487	2.8607	2.599	3.122	0.133	21.44	0	-0.051	-0.057	-0.045	0.003	-15.698	0	TRUE
Schizophrenia	mental disorders	-0.3298	-2.071	1.412	0.888	-0.371	0.719068	0.12606	4.10416	10	5541	10	2454	0.710487	0.908296	not_significant	-0.14323	0.148444	2.8619	2.601	3.123	0.133	21.455	0	-0.0513	-0.058	-0.045	0.003	-15.789	0	TRUE
Sciatica	symptoms	-0.5375	-0.869	-0.206	0.169	-3.177	0.584207	0.419371	0.813833	82	5469	68	2396	0.0014893	0.0181908	con_significant	-0.233433	2.82702	2.8575	2.596	3.119	0.133	21.412	0	-0.0509	-0.057	-0.045	0.003	-15.656	0	TRUE
Scleritis and episcleritis	sense organs	-2.169	-4.398	0.06	1.137	-1.908	0.114292	0.0123019	1.06184	10	5541	10	2454	0.056448	0.272453	not_significant	-0.941985	1.24835	2.8616	2.6	3.123	0.133	21.45	0	-0.0512	-0.058	-0.045	0.003	-15.775	0	TRUE
Sebaceous cyst	dermatologic	-0.6393	-0.929	-0.35	0.148	-4.332	0.527662	0.394948	0.704688	106	5445	92	2372	1.47799e-05	0.0003846	con_significant	-0.277644	4.83033	2.8664	2.605	3.128	0.134	21.47	0	-0.0509	-0.057	-0.045	0.003	-15.677	0	TRUE
Seborrheic dermatitis	dermatologic	-0.3777	-0.694	-0.061	0.161	-2.341	0.685436	0.499574	0.940823	103	5448	68	2396	0.0192535	0.135567	not_significant	-0.164033	1.71549	2.8666	2.605	3.128	0.133	21.477	0	-0.0512	-0.058	-0.045	0.003	-15.753	0	TRUE
Seborrheic keratosis	dermatologic	-0.7872	-1.073	-0.502	0.146	-5.407	0.455117	0.341981	0.605319	93	5458	115	2349	6.39278e-08	2.55072e-06	con_significant	-0.341877	7.19431	2.7992	2.537	3.062	0.134	20.897	0	-0.0491	-0.056	-0.043	0.003	-15.014	0	TRUE
Second degree AV block	circulatory system	-1.5124	-3.22	0.195	0.871	-1.736	0.22038	0.0399551	1.21531	10	5541	10	2454	0.0825635	0.343154	not_significant	-0.656827	1.08321	2.8627	2.601	3.124	0.133	21.46	0	-0.0513	-0.058	-0.045	0.003	-15.786	0	TRUE
Secondary diabetes mellitus	endocrine/metabolic	1.5362	0.299	2.774	0.631	2.433	4.6469	1.34851	16.0226	23	5528	10	2454	0.0149664	0.114107	not_significant	0.667163	1.82488	2.8734	2.611	3.135	0.134	21.495	0	-0.0516	-0.058	-0.045	0.003	-15.866	0	TRUE
Secondary hyperparathyroidism (of renal origin)	genitourinary	0.1426	-1.06	1.346	0.614	0.232	1.15327	0.346456	3.84203	10	5541	10	2454	0.816245	0.953093	not_significant	0.0619304	0.0881797	2.8613	2.6	3.123	0.133	21.453	0	-0.0513	-0.058	-0.045	0.003	-15.787	0	TRUE
Secondary hypothyroidism	endocrine/metabolic	0.2601	-0.866	1.386	0.574	0.453	1.29706	0.420631	3.99882	10	5541	10	2454	0.650594	0.893075	not_significant	0.11296	0.18669	2.8631	2.602	3.125	0.133	21.455	0	-0.0513	-0.058	-0.045	0.003	-15.79	0	TRUE
Secondary malignancy of bone	neoplasms	1.6528	-0.469	3.774	1.082	1.527	5.22158	0.625628	43.5539	10	5541	10	2454	0.126773	0.42352	not_significant	0.717802	0.896972	2.8626	2.601	3.124	0.133	21.454	0	-0.0513	-0.058	-0.045	0.003	-15.8	0	TRUE
Secondary malignancy of lymph nodes	neoplasms	0.4188	-0.386	1.224	0.411	1.02	1.52014	0.679771	3.40076	28	5523	10	2454	0.307793	0.660266	not_significant	0.181883	0.511741	2.8596	2.598	3.121	0.133	21.43	0	-0.0513	-0.058	-0.045	0.003	-15.779	0	TRUE
Secondary malignancy of respiratory organs	neoplasms	0.1724	-1.029	1.374	0.613	0.281	1.18815	0.357364	3.95112	10	5541	10	2454	0.77858	0.934887	not_significant	0.0748724	0.108697	2.8611	2.6	3.123	0.133	21.452	0	-0.0513	-0.058	-0.045	0.003	-15.787	0	TRUE
Secondary malignant neoplasm	neoplasms	-0.0895	-1.075	0.896	0.503	-0.178	0.914388	0.341298	2.44978	12	5539	10	2454	0.858686	0.957028	not_significant	-0.0388694	0.0661654	2.8607	2.599	3.122	0.133	21.447	0	-0.0512	-0.058	-0.045	0.003	-15.776	0	TRUE
Secondary malignant neoplasm of digestive systems	neoplasms	0.2208	-0.997	1.439	0.621	0.355	1.24707	0.368985	4.21648	10	5541	10	2454	0.722258	0.908296	not_significant	0.0958922	0.141308	2.8615	2.6	3.123	0.133	21.452	0	-0.0513	-0.058	-0.045	0.003	-15.787	0	TRUE
Secondary malignant neoplasm of liver	neoplasms	-0.04	-1.426	1.346	0.707	-0.057	0.960789	0.240268	3.84203	10	5541	10	2454	0.954941	0.98881	not_significant	-0.0173718	0.0200237	2.8612	2.6	3.123	0.133	21.451	0	-0.0512	-0.058	-0.045	0.003	-15.785	0	TRUE
Secondary thrombocytopenia	hematopoietic	0.3191	-0.642	1.28	0.49	0.651	1.37589	0.526239	3.59664	18	5533	10	2454	0.515355	0.83588	not_significant	0.138583	0.287894	2.861	2.6	3.123	0.133	21.447	0	-0.0513	-0.058	-0.045	0.003	-15.787	0	TRUE
Secondary/extrinsic cardiomyopathies	circulatory system	1.5295	-0.073	3.132	0.818	1.87	4.61587	0.929601	22.9198	14	5537	10	2454	0.0614202	0.289304	not_significant	0.664253	1.21169	2.87	2.608	3.132	0.134	21.483	0	-0.0515	-0.058	-0.045	0.003	-15.84	0	TRUE
Senile cataract	sense organs	0.5367	-0.094	1.168	0.322	1.667	1.71035	0.910283	3.21556	31	5520	16	2448	0.0954795	0.373959	not_significant	0.233086	1.02009	2.8883	2.625	3.152	0.134	21.484	0	-0.052	-0.058	-0.046	0.003	-15.859	0	TRUE
Sensorineural hearing loss	sense organs	-0.7624	-1.203	-0.322	0.225	-3.394	0.466545	0.300292	0.724698	40	5511	46	2418	0.000689771	0.00982924	con_significant	-0.331106	3.1613	2.8454	2.584	3.107	0.134	21.299	0	-0.0506	-0.057	-0.044	0.003	-15.554	0	TRUE
Separation of retinal layers	sense organs	-0.6692	-1.765	0.427	0.559	-1.197	0.512118	0.171187	1.53265	10	5541	10	2454	0.231382	0.575819	not_significant	-0.29063	0.63567	2.8627	2.601	3.124	0.133	21.46	0	-0.0513	-0.058	-0.045	0.003	-15.787	0	TRUE
Sepsis	injuries & poisonings	0.7167	0.005	1.428	0.363	1.974	2.04766	1.00501	4.17035	44	5507	10	2454	0.0483361	0.246206	not_significant	0.311259	1.31573	2.8609	2.599	3.123	0.134	21.426	0	-0.0513	-0.058	-0.045	0.003	-15.794	0	TRUE
Septal Deviations/Turbinate Hypertrophy	respiratory	-0.5168	-0.8	-0.234	0.144	-3.58	0.596426	0.449329	0.791362	118	5433	91	2373	0.000344096	0.00564222	con_significant	-0.224443	3.46332	2.8663	2.605	3.128	0.134	21.466	0	-0.051	-0.057	-0.045	0.003	-15.695	0	TRUE
Septic shock	injuries & poisonings	-0.2707	-1.652	1.111	0.705	-0.384	0.762845	0.191666	3.03739	10	5541	10	2454	0.701013	0.908296	not_significant	-0.117564	0.154274	2.8626	2.601	3.124	0.133	21.454	0	-0.0513	-0.058	-0.045	0.003	-15.79	0	TRUE
Septicemia	infectious diseases	0.5043	-0.187	1.195	0.353	1.43	1.65583	0.829444	3.30356	40	5511	11	2453	0.152579	0.466426	not_significant	0.219015	0.816505	2.8601	2.599	3.122	0.133	21.431	0	-0.0513	-0.058	-0.045	0.003	-15.788	0	TRUE
severe protein-calorie malnutrition	endocrine/metabolic	0.4196	-0.599	1.439	0.52	0.807	1.52135	0.549361	4.21648	18	5533	10	2454	0.419588	0.763292	not_significant	0.18223	0.377177	2.8597	2.598	3.121	0.133	21.435	0	-0.0512	-0.058	-0.045	0.003	-15.779	0	TRUE
Sexual and gender identity disorders	mental disorders	0.4855	-0.039	1.01	0.268	1.813	1.62499	0.961751	2.7456	64	5487	19	2445	0.0698377	0.31477	not_significant	0.21085	1.15591	2.8619	2.6	3.123	0.133	21.445	0	-0.0514	-0.058	-0.045	0.003	-15.813	0	TRUE
Sexually transmitted infections (not HIV or hepatitis)	infectious diseases	1.4688	0.681	2.257	0.402	3.654	4.34402	1.97585	9.55438	71	5480	10	2454	0.000258021	0.00454192	mi_significant	0.637892	3.58835	2.849	2.587	3.111	0.134	21.291	0	-0.0512	-0.058	-0.045	0.003	-15.713	0	TRUE
Shock	symptoms	0.2281	-1.526	1.982	0.895	0.255	1.25621	0.217404	7.25724	10	5541	10	2454	0.798807	0.946533	not_significant	0.0990626	0.0975584	2.8618	2.6	3.123	0.133	21.452	0	-0.0513	-0.058	-0.045	0.003	-15.786	0	TRUE
Shortness of breath	respiratory	-0.3451	-0.609	-0.081	0.135	-2.56	0.70815	0.543894	0.922194	152	5399	102	2362	0.0104794	0.0849247	not_significant	-0.149875	1.97966	2.8594	2.598	3.121	0.133	21.422	0	-0.0509	-0.057	-0.045	0.003	-15.659	0	TRUE
Sialoadenitis	digestive	-0.5495	-2.055	0.956	0.768	-0.715	0.577238	0.128093	2.60127	10	5541	10	2454	0.474383	0.802029	not_significant	-0.238645	0.323871	2.8619	2.6	3.123	0.133	21.456	0	-0.0513	-0.058	-0.045	0.003	-15.787	0	TRUE
Sialolithiasis	digestive	-0.7602	-3.624	2.103	1.461	-0.52	0.467573	0.0266758	8.19071	10	5541	10	2454	0.602849	0.873333	not_significant	-0.330151	0.219791	2.8611	2.6	3.122	0.133	21.452	0	-0.0512	-0.058	-0.045	0.003	-15.784	0	TRUE
Sickle cell anemia	hematopoietic	-0.2751	-1.343	0.793	0.545	-0.505	0.759496	0.261061	2.21002	11	5540	10	2454	0.613646	0.87758	not_significant	-0.119474	0.212082	2.8635	2.602	3.125	0.133	21.455	0	-0.0513	-0.058	-0.045	0.003	-15.792	0	TRUE
Simple and unspecified goiter	endocrine/metabolic	0.7183	-0.976	2.413	0.864	0.831	2.05094	0.376815	11.1674	10	5541	10	2454	0.406054	0.75147	not_significant	0.311954	0.391417	2.8625	2.601	3.124	0.133	21.465	0	-0.0513	-0.058	-0.045	0.003	-15.802	0	TRUE
Sinoatrial node dysfunction (Bradycardia)	circulatory system	-0.563	-1.579	0.453	0.518	-1.087	0.569498	0.206181	1.57302	10	5541	10	2454	0.277243	0.628523	not_significant	-0.244508	0.557139	2.8581	2.597	3.12	0.133	21.423	0	-0.0511	-0.058	-0.045	0.003	-15.744	0	TRUE
Skull and face fracture and other intercranial injury	injuries & poisonings	-0.9777	-1.551	-0.405	0.292	-3.345	0.376175	0.212036	0.666977	23	5528	27	2437	0.000821766	0.0115724	con_significant	-0.42461	3.08525	2.8671	2.605	3.129	0.134	21.476	0	-0.0512	-0.058	-0.045	0.003	-15.767	0	TRUE
Sleep apnea	neurological	-0.3464	-0.577	-0.116	0.117	-2.948	0.70723	0.561581	0.890475	194	5357	136	2328	0.00319739	0.0324345	con_significant	-0.15044	2.4952	2.8505	2.589	3.112	0.134	21.348	0	-0.0506	-0.057	-0.044	0.003	-15.54	0	TRUE
Sleep disorders	neurological	-0.4063	-0.781	-0.032	0.191	-2.127	0.66611	0.457948	0.968507	70	5481	50	2414	0.0334115	0.192277	not_significant	-0.176454	1.4761	2.8605	2.599	3.122	0.133	21.445	0	-0.0511	-0.057	-0.045	0.003	-15.725	0	TRUE
Sleep related leg cramps	neurological	-0.5809	-3.392	2.23	1.434	-0.405	0.559395	0.0336413	9.29987	10	5541	10	2454	0.685458	0.907807	not_significant	-0.252282	0.164019	2.8608	2.599	3.122	0.133	21.449	0	-0.0512	-0.058	-0.045	0.003	-15.781	0	TRUE
Sleep related movement disorders	neurological	0.2811	-1.083	1.645	0.696	0.404	1.32459	0.338578	5.18101	10	5541	10	2454	0.686222	0.907807	not_significant	0.12208	0.163535	2.8612	2.6	3.123	0.133	21.454	0	-0.0513	-0.058	-0.045	0.003	-15.789	0	TRUE
Solitary pulmonary nodule	respiratory	0.9767	0.169	1.785	0.412	2.37	2.65568	1.18412	5.95958	44	5507	10	2454	0.0177945	0.126793	not_significant	0.424175	1.74971	2.854	2.592	3.116	0.134	21.375	0	-0.0512	-0.058	-0.045	0.003	-15.751	0	TRUE
Somatoform disorder	mental disorders	0.3601	-0.96	1.68	0.674	0.534	1.43347	0.382893	5.36556	10	5541	10	2454	0.593019	0.866265	not_significant	0.156389	0.226932	2.8611	2.6	3.123	0.133	21.451	0	-0.0513	-0.058	-0.045	0.003	-15.788	0	TRUE
Spasm of muscle	symptoms	-0.2318	-0.729	0.265	0.253	-0.914	0.793105	0.482391	1.30343	43	5508	26	2438	0.360456	0.703301	not_significant	-0.100669	0.443148	2.861	2.6	3.122	0.133	21.451	0	-0.0512	-0.058	-0.045	0.003	-15.766	0	TRUE
Specific nonpsychotic mental disorders due to brain damage	mental disorders	-0.4897	-1.465	0.486	0.498	-0.984	0.61281	0.231078	1.6258	10	5541	10	2454	0.325218	0.675844	not_significant	-0.212674	0.487825	2.8628	2.601	3.124	0.133	21.461	0	-0.0513	-0.058	-0.045	0.003	-15.789	0	TRUE
Spermatocele	genitourinary	-0.4552	-0.949	0.038	0.252	-1.808	0.634321	0.387128	1.03873	38	5513	31	2433	0.0706657	0.314914	not_significant	-0.197691	1.15079	2.8555	2.594	3.117	0.133	21.405	0	-0.051	-0.057	-0.045	0.003	-15.697	0	TRUE
Spinal cord injury without evidence of spinal bone injury	injuries & poisonings	1.0398	-0.443	2.522	0.756	1.375	2.82865	0.642107	12.4535	15	5536	10	2454	0.169204	0.492317	not_significant	0.451579	0.771589	2.8559	2.594	3.117	0.133	21.408	0	-0.0512	-0.058	-0.045	0.003	-15.756	0	TRUE
Spinal stenosis	musculoskeletal	-0.5418	-1.173	0.09	0.322	-1.681	0.5817	0.309437	1.09417	20	5531	21	2443	0.0927499	0.37131	not_significant	-0.235301	1.03269	2.851	2.589	3.113	0.134	21.349	0	-0.0509	-0.057	-0.045	0.003	-15.651	0	TRUE
Spinal stenosis of lumbar region	musculoskeletal	-0.5838	-1.128	-0.039	0.278	-2.101	0.557775	0.32368	0.961751	29	5522	26	2438	0.0356001	0.201959	not_significant	-0.253541	1.44855	2.8584	2.597	3.12	0.133	21.42	0	-0.0511	-0.057	-0.045	0.003	-15.718	0	TRUE
Splenomegaly	digestive	-0.1258	-0.708	0.456	0.297	-0.423	0.881791	0.492628	1.57775	34	5517	19	2445	0.671949	0.902719	not_significant	-0.0546342	0.172664	2.8607	2.599	3.122	0.133	21.448	0	-0.0512	-0.058	-0.045	0.003	-15.771	0	TRUE
Spondylolisthesis, congenital	congenital anomalies	-0.3594	-2.184	1.466	0.931	-0.386	0.698095	0.11259	4.33187	10	5541	10	2454	0.699511	0.908296	not_significant	-0.156085	0.155206	2.8612	2.6	3.123	0.133	21.453	0	-0.0512	-0.058	-0.045	0.003	-15.784	0	TRUE
Spondylosis with myelopathy	musculoskeletal	0.3995	-1.242	2.041	0.838	0.477	1.49108	0.288806	7.6983	10	5541	10	2454	0.633397	0.884687	not_significant	0.173501	0.198324	2.8621	2.601	3.124	0.133	21.456	0	-0.0513	-0.058	-0.045	0.003	-15.792	0	TRUE
Spondylosis without myelopathy	musculoskeletal	-0.3816	-0.715	-0.049	0.17	-2.245	0.682768	0.489192	0.952181	86	5465	66	2398	0.0247458	0.15752	not_significant	-0.165727	1.6065	2.8506	2.589	3.112	0.134	21.351	0	-0.0508	-0.057	-0.044	0.003	-15.607	0	TRUE
Spontaneous ecchymoses	hematopoietic	-0.863	-2.508	0.782	0.839	-1.028	0.421894	0.0814309	2.18584	10	5541	10	2454	0.303816	0.656439	not_significant	-0.374796	0.51739	2.8622	2.601	3.124	0.133	21.457	0	-0.0513	-0.058	-0.045	0.003	-15.787	0	TRUE
Sprains and strains	injuries & poisonings	-0.7382	-0.942	-0.534	0.104	-7.093	0.477973	0.389847	0.586255	209	5342	199	2265	1.31511e-12	1.57419e-10	con_significant	-0.320596	11.881	2.8653	2.603	3.128	0.134	21.413	0	-0.0503	-0.057	-0.044	0.003	-15.441	0	TRUE
Sprains and strains of back and neck		-0.3849	-0.773	0.004	0.198	-1.942	0.680519	0.461626	1.00401	66	5485	45	2419	0.0521031	0.256656	not_significant	-0.16716	1.28314	2.8629	2.601	3.124	0.133	21.463	0	-0.0511	-0.058	-0.045	0.003	-15.753	0	TRUE
Squamous cell carcinoma	neoplasms	-0.376	-1.72	0.968	0.686	-0.548	0.686602	0.179066	2.63267	10	5541	10	2454	0.583516	0.863914	not_significant	-0.163295	0.233947	2.8573	2.596	3.119	0.134	21.396	0	-0.0511	-0.058	-0.045	0.003	-15.725	0	TRUE
Staphylococcus infections	infectious diseases	-0.6523	-1.58	0.275	0.473	-1.378	0.520846	0.205975	1.31653	10	5541	10	2454	0.168148	0.492317	not_significant	-0.28329	0.774307	2.8563	2.595	3.118	0.133	21.41	0	-0.0511	-0.057	-0.045	0.003	-15.726	0	TRUE
Stiffness of joint	musculoskeletal	-0.8598	-1.4	-0.32	0.276	-3.12	0.423247	0.246597	0.726149	26	5525	30	2434	0.00180865	0.0208168	con_significant	-0.373406	2.74265	2.8576	2.596	3.119	0.133	21.421	0	-0.051	-0.057	-0.045	0.003	-15.7	0	TRUE
Stomatitis and mucositis	digestive	0.6355	-0.456	1.727	0.557	1.141	1.88797	0.633814	5.62376	20	5531	10	2454	0.253858	0.597759	not_significant	0.275994	0.595409	2.8569	2.595	3.118	0.133	21.406	0	-0.0512	-0.058	-0.045	0.003	-15.756	0	TRUE
Stomatitis and mucositis (ulcerative)	digestive	-0.6841	-2.01	0.642	0.676	-1.011	0.504544	0.133989	1.90028	10	5541	10	2454	0.311856	0.66422	not_significant	-0.297101	0.506046	2.8632	2.602	3.125	0.133	21.462	0	-0.0513	-0.058	-0.045	0.003	-15.792	0	TRUE
Strabismus (not specified as paralytic)	sense organs	-0.0827	-1.176	1.01	0.558	-0.148	0.920627	0.30851	2.7456	10	5541	10	2454	0.882137	0.959054	not_significant	-0.0359162	0.054464	2.8612	2.6	3.123	0.133	21.453	0	-0.0512	-0.058	-0.045	0.003	-15.785	0	TRUE
Strabismus and other disorders of binocular eye movements	sense organs	0.5802	-0.959	2.119	0.785	0.739	1.7864	0.383276	8.32281	10	5541	10	2454	0.459917	0.793258	not_significant	0.251978	0.33732	2.8585	2.597	3.12	0.133	21.425	0	-0.0512	-0.058	-0.045	0.003	-15.767	0	TRUE
Streptococcus infection	infectious diseases	0.0722	-1.065	1.21	0.58	0.124	1.07487	0.344728	3.35348	10	5541	10	2454	0.901028	0.969036	not_significant	0.0313561	0.0452618	2.8615	2.6	3.123	0.133	21.448	0	-0.0513	-0.058	-0.045	0.003	-15.78	0	TRUE
Stress fracture	musculoskeletal	-0.6681	-2.193	0.856	0.778	-0.859	0.512682	0.111582	2.35373	10	5541	10	2454	0.390354	0.736992	not_significant	-0.290152	0.408542	2.8629	2.601	3.124	0.133	21.462	0	-0.0513	-0.058	-0.045	0.003	-15.793	0	TRUE
Stricture and stenosis of esophagus	digestive	-0.1053	-1.215	1.004	0.566	-0.186	0.900054	0.29671	2.72918	10	5541	10	2454	0.852507	0.954959	not_significant	-0.0457312	0.0693022	2.861	2.6	3.122	0.133	21.451	0	-0.0512	-0.058	-0.045	0.003	-15.782	0	TRUE
Stricture of artery	circulatory system	-0.3061	-2.707	2.095	1.225	-0.25	0.736313	0.0667367	8.12544	10	5541	10	2454	0.802729	0.947337	not_significant	-0.132938	0.0954312	2.8616	2.6	3.123	0.133	21.453	0	-0.0513	-0.058	-0.045	0.003	-15.787	0	TRUE
Stricture/obstruction of ureter	genitourinary	-0.2372	-1.066	0.592	0.423	-0.561	0.788834	0.344383	1.8076	13	5538	12	2452	0.574918	0.858101	not_significant	-0.103015	0.240394	2.8565	2.595	3.118	0.134	21.376	0	-0.0511	-0.057	-0.045	0.003	-15.7	0	TRUE
Subarachnoid hemorrhage	circulatory system	-0.7018	-2.314	0.91	0.822	-0.853	0.495692	0.098865	2.48432	10	5541	10	2454	0.393492	0.73826	not_significant	-0.304788	0.405064	2.8609	2.599	3.122	0.133	21.45	0	-0.0512	-0.058	-0.045	0.003	-15.778	0	TRUE
Subdural hemorrhage	circulatory system	-0.4583	-1.756	0.839	0.662	-0.692	0.632358	0.172734	2.31405	10	5541	10	2454	0.488655	0.814651	not_significant	-0.199037	0.310998	2.862	2.601	3.123	0.133	21.458	0	-0.0513	-0.058	-0.045	0.003	-15.788	0	TRUE
Subdural hemorrhage (injury)		-0.1579	-2.699	2.384	1.297	-0.122	0.853935	0.0672728	10.8482	10	5541	10	2454	0.903076	0.970361	not_significant	-0.0685751	0.0442755	2.8611	2.6	3.123	0.133	21.453	0	-0.0512	-0.058	-0.045	0.003	-15.785	0	TRUE
Subjective visual disturbances	sense organs	-0.1627	-0.803	0.477	0.326	-0.498	0.849846	0.447983	1.61123	29	5522	15	2449	0.618134	0.879261	not_significant	-0.0706597	0.208918	2.862	2.601	3.123	0.133	21.457	0	-0.0512	-0.058	-0.045	0.003	-15.786	0	TRUE
Substance addiction and disorders	mental disorders	-0.4667	-0.938	0.005	0.241	-1.94	0.627068	0.39141	1.00501	45	5506	31	2433	0.0524206	0.257162	not_significant	-0.202685	1.2805	2.8664	2.605	3.128	0.133	21.486	0	-0.0513	-0.058	-0.045	0.003	-15.791	0	TRUE
Suicidal ideation	mental disorders	-1.4809	-2.981	0.019	0.765	-1.935	0.227433	0.0507421	1.01918	10	5541	10	2454	0.0529834	0.257809	not_significant	-0.643147	1.27586	2.8656	2.604	3.127	0.133	21.466	0	-0.0513	-0.058	-0.045	0.003	-15.794	0	TRUE
Suicidal ideation or attempt	mental disorders	0.2802	-2.031	2.592	1.179	0.238	1.32339	0.131204	13.3565	10	5541	10	2454	0.812154	0.952153	not_significant	0.121689	0.0903617	2.861	2.6	3.122	0.133	21.45	0	-0.0512	-0.058	-0.045	0.003	-15.785	0	TRUE
Superficial cellulitis and abscess	dermatologic	0.2343	-0.182	0.651	0.212	1.103	1.26402	0.833601	1.91746	81	5470	33	2431	0.270077	0.618131	not_significant	0.101755	0.568512	2.8644	2.603	3.126	0.133	21.465	0	-0.0514	-0.058	-0.045	0.003	-15.815	0	TRUE
Superficial injury without mention of infection	injuries & poisonings	-0.3914	-0.771	-0.012	0.194	-2.021	0.67611	0.46255	0.988072	69	5482	49	2415	0.0432798	0.22822	not_significant	-0.169983	1.36371	2.8594	2.598	3.121	0.133	21.44	0	-0.0511	-0.057	-0.045	0.003	-15.72	0	TRUE
Suppurative and unspecified otitis media	sense organs	-0.8347	-1.247	-0.422	0.211	-3.965	0.434005	0.287366	0.655734	47	5504	48	2416	7.34031e-05	0.00154147	con_significant	-0.362506	4.13429	2.87	2.608	3.132	0.133	21.5	0	-0.0512	-0.058	-0.045	0.003	-15.76	0	TRUE
Supraventricular premature beats	circulatory system	-0.7833	-1.7	0.133	0.468	-1.675	0.456896	0.182684	1.14225	10	5541	11	2453	0.0939813	0.372502	not_significant	-0.340183	1.02696	2.8568	2.595	3.118	0.133	21.404	0	-0.0511	-0.057	-0.045	0.003	-15.72	0	TRUE
Swelling of limb	symptoms	-0.4797	-0.878	-0.082	0.203	-2.363	0.618969	0.415613	0.921272	60	5491	46	2418	0.0181275	0.128394	not_significant	-0.208331	1.74166	2.8606	2.599	3.122	0.133	21.44	0	-0.0511	-0.057	-0.045	0.003	-15.719	0	TRUE
Swelling, mass, or lump in head and neck [Space-occupying lesion, intracranial NOS]	mental disorders	-0.1237	-0.548	0.301	0.217	-0.571	0.883645	0.578105	1.35121	68	5483	34	2430	0.568329	0.858101	not_significant	-0.0537222	0.2454	2.8629	2.601	3.124	0.133	21.456	0	-0.0513	-0.058	-0.045	0.003	-15.785	0	TRUE
Symptoms affecting skin	dermatologic	-0.3071	-1.105	0.491	0.407	-0.754	0.735577	0.331211	1.63395	15	5536	11	2453	0.450549	0.788338	not_significant	-0.133372	0.346258	2.8592	2.598	3.121	0.133	21.435	0	-0.0512	-0.058	-0.045	0.003	-15.756	0	TRUE
Symptoms and disorders of the joints	musculoskeletal	-0.9553	-1.327	-0.584	0.189	-5.042	0.384697	0.265272	0.557663	54	5497	64	2400	4.61621e-07	1.72675e-05	con_significant	-0.414882	6.33571	2.8677	2.606	3.13	0.134	21.473	0	-0.051	-0.057	-0.045	0.003	-15.697	0	TRUE
Symptoms involving cardiovascular system	circulatory system	-0.3694	-0.925	0.186	0.283	-1.303	0.691149	0.396531	1.20442	31	5520	23	2441	0.192434	0.527179	not_significant	-0.160428	0.715718	2.8584	2.597	3.12	0.133	21.427	0	-0.0511	-0.057	-0.045	0.003	-15.735	0	TRUE
Symptoms involving digestive system	digestive	0.0046	-0.454	0.463	0.234	0.02	1.00461	0.635083	1.58883	59	5492	29	2435	0.984262	0.997615	not_significant	0.00199775	0.00688928	2.8611	2.6	3.123	0.133	21.451	0	-0.0512	-0.058	-0.045	0.003	-15.779	0	TRUE
Symptoms involving head and neck	mental disorders	-0.7947	-1.654	0.065	0.439	-1.811	0.451717	0.191283	1.06716	10	5541	12	2452	0.0700745	0.31477	not_significant	-0.345134	1.15444	2.857	2.595	3.119	0.133	21.412	0	-0.0511	-0.057	-0.045	0.003	-15.725	0	TRUE
Symptoms involving nervous and musculoskeletal systems	symptoms	0.1335	-0.938	1.205	0.547	0.244	1.14282	0.39141	3.33676	13	5538	10	2454	0.807039	0.948013	not_significant	0.0579783	0.0931057	2.8609	2.599	3.122	0.133	21.449	0	-0.0512	-0.058	-0.045	0.003	-15.785	0	TRUE
Symptoms involving respiratory system and other chest symptoms	respiratory	-0.3587	-0.931	0.213	0.292	-1.229	0.698584	0.394159	1.23738	31	5520	21	2443	0.219042	0.559049	not_significant	-0.155781	0.659472	2.8608	2.599	3.122	0.133	21.453	0	-0.0512	-0.058	-0.045	0.003	-15.764	0	TRUE
Symptoms of the muscles	symptoms	-1.0518	-1.64	-0.464	0.3	-3.504	0.349308	0.19398	0.628764	21	5530	26	2438	0.000457906	0.00711836	con_significant	-0.456791	3.33922	2.8691	2.607	3.131	0.133	21.497	0	-0.0513	-0.058	-0.045	0.003	-15.787	0	TRUE
Syncope and collapse	symptoms	-0.8491	-1.234	-0.464	0.197	-4.321	0.4278	0.291126	0.628764	52	5499	58	2406	1.55517e-05	0.000396071	con_significant	-0.368759	4.80822	2.8586	2.597	3.12	0.133	21.414	0	-0.0509	-0.057	-0.044	0.003	-15.648	0	TRUE
Synoviopathy	musculoskeletal	-0.7405	-1.408	-0.073	0.341	-2.174	0.476875	0.244632	0.929601	18	5533	18	2446	0.0296687	0.174907	not_significant	-0.321595	1.5277	2.8609	2.599	3.122	0.133	21.447	0	-0.0511	-0.058	-0.045	0.003	-15.752	0	TRUE
Synovitis and tenosynovitis	musculoskeletal	-0.7006	-1.01	-0.391	0.158	-4.44	0.496287	0.364219	0.67638	86	5465	85	2379	8.99333e-06	0.000258842	con_significant	-0.304267	5.04608	2.8506	2.589	3.112	0.133	21.365	0	-0.0506	-0.057	-0.044	0.003	-15.558	0	TRUE
Systemic inflammatory response syndrome (SIRS)	injuries & poisonings	1.3667	-0.159	2.893	0.779	1.756	3.92239	0.852996	18.0474	14	5537	10	2454	0.0791684	0.336524	not_significant	0.59355	1.10145	2.8666	2.605	3.128	0.134	21.462	0	-0.0514	-0.058	-0.045	0.003	-15.816	0	TRUE
Tachycardia NOS	circulatory system	0.0374	-0.407	0.481	0.227	0.165	1.03811	0.665644	1.61769	70	5481	30	2434	0.869027	0.958318	not_significant	0.0162426	0.0609667	2.8607	2.599	3.122	0.133	21.445	0	-0.0512	-0.058	-0.045	0.003	-15.786	0	TRUE
Temporomandibular joint disorder, unspecified	digestive	-0.2773	-1.095	0.54	0.417	-0.665	0.757827	0.33454	1.71601	17	5534	10	2454	0.506091	0.829862	not_significant	-0.12043	0.295772	2.8633	2.602	3.125	0.133	21.46	0	-0.0513	-0.058	-0.045	0.003	-15.793	0	TRUE
Temporomandibular joint disorders	digestive	-0.2988	-2.006	1.408	0.871	-0.343	0.741708	0.134526	4.08777	10	5541	10	2454	0.731493	0.908296	not_significant	-0.129767	0.13579	2.8619	2.6	3.123	0.133	21.454	0	-0.0513	-0.058	-0.045	0.003	-15.788	0	TRUE
Tension headache	mental disorders	-0.3573	-1.003	0.289	0.33	-1.084	0.699563	0.366777	1.33509	25	5526	16	2448	0.278491	0.629478	not_significant	-0.155173	0.55519	2.8628	2.601	3.124	0.133	21.458	0	-0.0512	-0.058	-0.045	0.003	-15.78	0	TRUE
Testicular dysfunction	endocrine/metabolic	2.7074	0.678	4.737	1.036	2.614	14.9903	1.96993	114.091	23	5528	10	2454	0.00893967	0.0758921	not_significant	1.17581	2.04868	2.8805	2.618	3.143	0.134	21.511	0	-0.0518	-0.058	-0.045	0.003	-15.897	0	TRUE
Testicular hypofunction	endocrine/metabolic	2.6276	2.368	2.887	0.132	19.866	13.8405	10.676	17.9394	1489	4062	63	2401	8.07683e-88	9.66797e-85	mi_significant	1.14115	87.0928	2.5413	2.264	2.818	0.141	17.975	0	-0.0502	-0.057	-0.043	0.003	-14.586	0	TRUE
Thoracic or lumbosacral neuritis or radiculitis, unspecified	symptoms	-0.5732	-0.943	-0.204	0.188	-3.041	0.563719	0.389458	0.815462	65	5486	55	2409	0.00235461	0.0251649	con_significant	-0.248938	2.62808	2.8605	2.599	3.122	0.133	21.431	0	-0.051	-0.057	-0.045	0.003	-15.693	0	TRUE
Throat pain	respiratory	-0.0959	-0.711	0.52	0.314	-0.305	0.908555	0.491153	1.68203	32	5519	16	2448	0.76	0.92077	not_significant	-0.0416488	0.119186	2.8616	2.6	3.123	0.133	21.453	0	-0.0512	-0.058	-0.045	0.003	-15.784	0	TRUE
Thrombocytopenia	hematopoietic	0.1301	-0.362	0.622	0.251	0.518	1.13894	0.696282	1.86265	54	5497	26	2438	0.604154	0.873333	not_significant	0.0565017	0.218852	2.8639	2.602	3.126	0.134	21.451	0	-0.0513	-0.058	-0.045	0.003	-15.785	0	TRUE
Thrombotic microangiopathy	circulatory system	-1.9529	-4.391	0.485	1.244	-1.57	0.141862	0.0123883	1.62418	10	5541	10	2454	0.116372	0.410906	not_significant	-0.848134	0.934152	2.8666	2.605	3.128	0.133	21.482	0	-0.0514	-0.058	-0.045	0.003	-15.815	0	TRUE
Thyroid cancer	neoplasms	-0.3062	-1.201	0.589	0.457	-0.671	0.736239	0.300893	1.80219	13	5538	10	2454	0.502442	0.828406	not_significant	-0.132981	0.298914	2.8617	2.6	3.123	0.133	21.456	0	-0.0512	-0.058	-0.045	0.003	-15.783	0	TRUE
Thyroid cyst		-0.426	-2.876	2.024	1.25	-0.341	0.653116	0.0563598	7.56854	10	5541	10	2454	0.73332	0.908679	not_significant	-0.185009	0.134706	2.8618	2.6	3.123	0.133	21.455	0	-0.0513	-0.058	-0.045	0.003	-15.789	0	TRUE
Thyrotoxicosis with or without goiter	endocrine/metabolic	0.4576	-0.45	1.365	0.463	0.988	1.58028	0.637628	3.91572	23	5528	10	2454	0.323055	0.675844	not_significant	0.198733	0.490724	2.858	2.597	3.119	0.133	21.425	0	-0.0512	-0.058	-0.045	0.003	-15.772	0	TRUE
Tics and stuttering	mental disorders	-0.5139	-1.764	0.736	0.638	-0.806	0.598158	0.171358	2.08757	10	5541	10	2454	0.420296	0.763421	not_significant	-0.223184	0.376445	2.8642	2.603	3.126	0.133	21.465	0	-0.0513	-0.058	-0.045	0.003	-15.799	0	TRUE
Tinnitus	sense organs	-0.5206	-0.894	-0.147	0.191	-2.732	0.594164	0.409016	0.863294	63	5488	55	2409	0.00630287	0.0589416	not_significant	-0.226094	2.20046	2.8502	2.589	3.112	0.133	21.36	0	-0.0508	-0.057	-0.044	0.003	-15.614	0	TRUE
Tobacco use disorder	mental disorders	-0.247	-0.581	0.087	0.17	-1.451	0.781141	0.559339	1.0909	101	5450	58	2406	0.146697	0.455877	not_significant	-0.107271	0.83358	2.865	2.603	3.126	0.133	21.473	0	-0.0512	-0.058	-0.045	0.003	-15.774	0	TRUE
Torsion dystonia	neurological	-1.1547	-2.161	-0.149	0.513	-2.249	0.315152	0.11521	0.861569	10	5541	10	2454	0.0244974	0.15752	not_significant	-0.50148	1.61088	2.8667	2.605	3.128	0.133	21.481	0	-0.0513	-0.058	-0.045	0.003	-15.802	0	TRUE
Torticollis	musculoskeletal	-0.545	-1.544	0.454	0.509	-1.07	0.579842	0.213525	1.5746	10	5541	10	2454	0.284704	0.632548	not_significant	-0.23669	0.545606	2.8622	2.601	3.124	0.133	21.457	0	-0.0512	-0.058	-0.045	0.003	-15.783	0	TRUE
Toxic effect of corrosive aromatics, acids, and caustic alkalis	injuries & poisonings	-1.2476	-4.048	1.553	1.429	-0.873	0.287193	0.0174573	4.72563	10	5541	10	2454	0.382564	0.73031	not_significant	-0.541826	0.417295	2.8634	2.602	3.125	0.133	21.463	0	-0.0513	-0.058	-0.045	0.003	-15.797	0	TRUE
Toxic effect of other substances, chiefly nonmedicinal as to source	injuries & poisonings	-0.8371	-3.615	1.941	1.417	-0.591	0.432964	0.0269169	6.96571	10	5541	10	2454	0.554769	0.851358	not_significant	-0.363548	0.255887	2.8615	2.6	3.123	0.133	21.454	0	-0.0512	-0.058	-0.045	0.003	-15.786	0	TRUE
Toxic effect of venom	injuries & poisonings	-0.305	-1.271	0.661	0.493	-0.619	0.737123	0.280551	1.93673	11	5540	10	2454	0.535942	0.844109	not_significant	-0.13246	0.270882	2.8613	2.6	3.123	0.133	21.453	0	-0.0512	-0.058	-0.045	0.003	-15.781	0	TRUE
Toxic erythema	dermatologic	-0.5296	-3.368	2.309	1.448	-0.366	0.58884	0.0344585	10.0644	10	5541	10	2454	0.714577	0.908296	not_significant	-0.230002	0.145951	2.8607	2.599	3.122	0.133	21.448	0	-0.0512	-0.058	-0.045	0.003	-15.78	0	TRUE
Toxic gastroenteritis and colitis	digestive	-0.6945	-2.674	1.285	1.01	-0.688	0.499324	0.0689758	3.61467	10	5541	10	2454	0.491628	0.817332	not_significant	-0.301618	0.308363	2.8609	2.599	3.122	0.133	21.45	0	-0.0512	-0.058	-0.045	0.003	-15.78	0	TRUE
Transient alteration of awareness	mental disorders	-0.9341	-2.338	0.47	0.716	-1.304	0.392939	0.0965205	1.59999	10	5541	10	2454	0.192194	0.527179	not_significant	-0.405674	0.71626	2.8639	2.602	3.125	0.133	21.467	0	-0.0513	-0.058	-0.045	0.003	-15.796	0	TRUE
Transient cerebral ischemia	circulatory system	0.9793	-0.649	2.608	0.831	1.179	2.66259	0.522568	13.5719	10	5541	10	2454	0.238468	0.583734	not_significant	0.425305	0.62257	2.8677	2.606	3.129	0.134	21.475	0	-0.0514	-0.058	-0.045	0.003	-15.82	0	TRUE
Traumatic amputation	injuries & poisonings	-1.2826	-3.713	1.148	1.24	-1.034	0.277315	0.0244042	3.15188	10	5541	10	2454	0.300992	0.653167	not_significant	-0.557026	0.521444	2.86	2.599	3.121	0.133	21.443	0	-0.0512	-0.058	-0.045	0.003	-15.772	0	TRUE
Trigeminal nerve disorders [CN5]	neurological	-1.5296	-2.899	-0.16	0.699	-2.189	0.216622	0.0550783	0.852144	10	5541	10	2454	0.0286183	0.170726	not_significant	-0.664297	1.54336	2.8594	2.598	3.121	0.133	21.436	0	-0.0512	-0.058	-0.045	0.003	-15.753	0	TRUE
Tuberculosis	infectious diseases	-0.0203	-1.432	1.391	0.72	-0.028	0.979905	0.238831	4.01887	10	5541	10	2454	0.977491	0.9941	not_significant	-0.00881618	0.00988741	2.8611	2.6	3.123	0.133	21.452	0	-0.0512	-0.058	-0.045	0.003	-15.784	0	TRUE
Type 1 diabetes	endocrine/metabolic	-0.4321	-1.078	0.214	0.33	-1.311	0.649144	0.340275	1.23862	23	5528	17	2447	0.189886	0.526605	not_significant	-0.187659	0.721508	2.8608	2.599	3.122	0.133	21.447	0	-0.0512	-0.058	-0.045	0.003	-15.762	0	TRUE
Type 1 diabetes with ketoacidosis	endocrine/metabolic	-0.9656	-2.927	0.996	1.001	-0.965	0.380755	0.0535575	2.70743	10	5541	10	2454	0.334645	0.685016	not_significant	-0.419355	0.475415	2.8629	2.601	3.124	0.133	21.461	0	-0.0513	-0.058	-0.045	0.003	-15.793	0	TRUE
Type 1 diabetes with ophthalmic manifestations	endocrine/metabolic	0.3679	-1.899	2.634	1.156	0.318	1.4447	0.149718	13.9294	10	5541	10	2454	0.750395	0.91749	not_significant	0.159777	0.12471	2.8611	2.6	3.122	0.133	21.452	0	-0.0513	-0.058	-0.045	0.003	-15.787	0	TRUE
Type 1 diabetes with renal manifestations	endocrine/metabolic	-0.6577	-3.434	2.118	1.416	-0.464	0.518041	0.0322577	8.31449	10	5541	10	2454	0.642364	0.886863	not_significant	-0.285635	0.192218	2.8609	2.6	3.122	0.133	21.45	0	-0.0512	-0.058	-0.045	0.003	-15.782	0	TRUE
Type 2 diabetes	endocrine/metabolic	0.565	0.261	0.869	0.155	3.639	1.75945	1.29823	2.38453	175	5376	64	2400	0.00027406	0.00468643	mi_significant	0.245376	3.56215	2.9204	2.657	3.184	0.135	21.694	0	-0.0531	-0.06	-0.047	0.003	-16.139	0	TRUE
Type 2 diabetes with ketoacidosis	endocrine/metabolic	0.8232	-1.451	3.098	1.161	0.709	2.27778	0.234336	22.1536	10	5541	10	2454	0.478138	0.803835	not_significant	0.357511	0.320447	2.8621	2.601	3.124	0.133	21.457	0	-0.0513	-0.058	-0.045	0.003	-15.794	0	TRUE
Type 2 diabetes with neurological manifestations	endocrine/metabolic	1.0229	-0.108	2.154	0.577	1.772	2.78125	0.897628	8.61927	14	5537	10	2454	0.0763386	0.331077	not_significant	0.44424	1.11726	2.8767	2.615	3.139	0.134	21.508	0	-0.0517	-0.058	-0.045	0.003	-15.867	0	TRUE
Type 2 diabetes with ophthalmic manifestations	endocrine/metabolic	0.3817	-0.624	1.388	0.513	0.744	1.46477	0.535797	4.00683	12	5539	10	2454	0.457121	0.792808	not_significant	0.16577	0.339969	2.8663	2.605	3.128	0.134	21.459	0	-0.0514	-0.058	-0.045	0.003	-15.799	0	TRUE
Type 2 diabetes with renal manifestations	endocrine/metabolic	1.1487	0.199	2.099	0.485	2.37	3.15409	1.22018	8.15801	22	5529	10	2454	0.0177955	0.126793	not_significant	0.498874	1.74969	2.8899	2.627	3.153	0.134	21.559	0	-0.0521	-0.058	-0.046	0.003	-15.937	0	TRUE
Ulcer of esophagus	digestive	-0.1556	-1.537	1.226	0.705	-0.221	0.855901	0.215025	3.40757	10	5541	10	2454	0.82528	0.953093	not_significant	-0.0675762	0.0833987	2.8601	2.599	3.122	0.133	21.433	0	-0.0512	-0.058	-0.045	0.003	-15.763	0	TRUE
Ulceration of intestine	digestive	-0.0894	-1.558	1.379	0.749	-0.119	0.91448	0.210557	3.97093	10	5541	10	2454	0.904981	0.970671	not_significant	-0.0388259	0.0433604	2.8609	2.599	3.122	0.133	21.449	0	-0.0512	-0.058	-0.045	0.003	-15.781	0	TRUE
Ulcerative colitis	digestive	0.124	-0.569	0.817	0.353	0.351	1.13202	0.566091	2.2637	28	5523	12	2452	0.72567	0.908296	not_significant	0.0538525	0.139261	2.8613	2.6	3.123	0.133	21.452	0	-0.0513	-0.058	-0.045	0.003	-15.788	0	TRUE
Ulcerative colitis (chronic)	digestive	-0.3905	-1.137	0.356	0.381	-1.025	0.676718	0.32078	1.42761	18	5533	12	2452	0.305491	0.658869	not_significant	-0.169592	0.515002	2.8623	2.601	3.124	0.133	21.457	0	-0.0512	-0.058	-0.045	0.003	-15.781	0	TRUE
Umbilical hernia	digestive	-0.0769	-0.682	0.528	0.309	-0.249	0.925982	0.505605	1.69554	26	5525	20	2444	0.803298	0.947337	not_significant	-0.0333972	0.0951235	2.8585	2.596	3.121	0.134	21.369	0	-0.0512	-0.058	-0.045	0.003	-15.693	0	TRUE
Unequal leg length (acquired)	musculoskeletal	-1.0654	-2.351	0.221	0.656	-1.624	0.34459	0.0952738	1.24732	10	5541	10	2454	0.104453	0.390345	not_significant	-0.462697	0.981081	2.8595	2.598	3.121	0.133	21.437	0	-0.0512	-0.058	-0.045	0.003	-15.758	0	TRUE
Unspecified disorder of lipoid metabolism	endocrine/metabolic	-0.9066	-1.797	-0.016	0.454	-1.996	0.403895	0.165796	0.984127	10	5541	11	2453	0.0459152	0.236899	not_significant	-0.393731	1.33804	2.8602	2.599	3.122	0.133	21.442	0	-0.0512	-0.058	-0.045	0.003	-15.755	0	TRUE
Unspecified erythematous condition	dermatologic	-0.4472	-1.163	0.268	0.365	-1.225	0.639416	0.312547	1.30735	19	5532	14	2450	0.220653	0.561075	not_significant	-0.194216	0.656289	2.8614	2.6	3.123	0.133	21.45	0	-0.0512	-0.058	-0.045	0.003	-15.769	0	TRUE
Unspecified osteomyelitis	musculoskeletal	0.7473	-0.574	2.069	0.674	1.108	2.11129	0.563268	7.9169	11	5540	10	2454	0.267755	0.615169	not_significant	0.324548	0.572262	2.8645	2.603	3.126	0.133	21.462	0	-0.0514	-0.058	-0.045	0.003	-15.806	0	TRUE
Unstable angina (intermediate coronary syndrome)	circulatory system	-2.2096	-4.348	-0.071	1.091	-2.025	0.109745	0.0129327	0.931462	10	5541	10	2454	0.0428862	0.22822	not_significant	-0.959617	1.36768	2.8488	2.587	3.111	0.134	21.325	0	-0.0509	-0.057	-0.045	0.003	-15.644	0	TRUE
Urethral discharge	genitourinary	0.2998	-1.043	1.642	0.685	0.438	1.34959	0.352396	5.16549	10	5541	10	2454	0.661628	0.897618	not_significant	0.130201	0.179386	2.8614	2.6	3.123	0.133	21.453	0	-0.0513	-0.058	-0.045	0.003	-15.789	0	TRUE
Urethral stricture (not specified as infectious)	genitourinary	0.2997	-1.144	1.744	0.737	0.407	1.34945	0.318542	5.72018	10	5541	10	2454	0.684104	0.907807	not_significant	0.130158	0.164878	2.8628	2.601	3.124	0.133	21.452	0	-0.0513	-0.058	-0.045	0.003	-15.788	0	TRUE
Urethritis and urethral syndrome	genitourinary	0.5264	-0.294	1.347	0.419	1.258	1.69283	0.745276	3.84587	26	5525	10	2454	0.208465	0.54722	not_significant	0.228613	0.680967	2.864	2.602	3.126	0.133	21.46	0	-0.0514	-0.058	-0.045	0.003	-15.808	0	TRUE
Urinary calculus	genitourinary	0.0206	-1.127	1.168	0.585	0.035	1.02081	0.324004	3.21556	10	5541	10	2454	0.971897	0.992792	not_significant	0.00894647	0.0123797	2.8614	2.6	3.123	0.134	21.415	0	-0.0513	-0.058	-0.045	0.003	-15.75	0	TRUE
Urinary complications NEC	genitourinary	-0.3685	-2.188	1.451	0.928	-0.397	0.691771	0.112141	4.26738	10	5541	10	2454	0.691423	0.908296	not_significant	-0.160038	0.160256	2.8612	2.6	3.123	0.133	21.453	0	-0.0512	-0.058	-0.045	0.003	-15.784	0	TRUE
Urinary incontinence	genitourinary	0.4296	-0.282	1.141	0.363	1.183	1.53664	0.754274	3.1299	30	5521	12	2452	0.236697	0.582514	not_significant	0.186573	0.625807	2.868	2.606	3.13	0.133	21.485	0	-0.0515	-0.058	-0.045	0.003	-15.83	0	TRUE
Urinary obstruction	genitourinary	1.0501	-0.093	2.193	0.583	1.801	2.85794	0.911194	8.96206	15	5536	10	2454	0.0717125	0.315588	not_significant	0.456053	1.14441	2.8766	2.614	3.139	0.134	21.499	0	-0.0517	-0.058	-0.045	0.003	-15.861	0	TRUE
Urinary tract infection	genitourinary	0.4593	0.03	0.889	0.219	2.096	1.58297	1.03045	2.4327	84	5467	32	2432	0.0360616	0.202656	not_significant	0.199471	1.44295	2.881	2.619	3.143	0.134	21.528	0	-0.0519	-0.058	-0.046	0.003	-15.903	0	TRUE
Urticaria	dermatologic	-0.29	-0.781	0.202	0.251	-1.156	0.748264	0.457948	1.22385	44	5507	27	2437	0.247542	0.588271	not_significant	-0.125945	0.606352	2.8622	2.601	3.124	0.133	21.461	0	-0.0512	-0.058	-0.045	0.003	-15.774	0	TRUE
Uveitis, noninfectious or NOS	sense organs	-0.3601	-1.286	0.566	0.472	-0.762	0.697607	0.276374	1.76121	11	5540	10	2454	0.445948	0.783848	not_significant	-0.156389	0.350715	2.8604	2.599	3.122	0.133	21.446	0	-0.0512	-0.058	-0.045	0.003	-15.77	0	TRUE
Valvular heart disease/ heart chambers	congenital anomalies	-0.767	-1.657	0.123	0.454	-1.688	0.464404	0.19071	1.13088	10	5541	12	2452	0.0913494	0.36941	not_significant	-0.333104	1.03929	2.8525	2.591	3.114	0.133	21.378	0	-0.051	-0.057	-0.045	0.003	-15.687	0	TRUE
Varicella infection	infectious diseases	-0.795	-2.401	0.811	0.819	-0.97	0.451581	0.0906273	2.25016	10	5541	10	2454	0.331939	0.681527	not_significant	-0.345264	0.478942	2.8618	2.6	3.123	0.133	21.455	0	-0.0512	-0.058	-0.045	0.003	-15.784	0	TRUE
Varicose veins	circulatory system	1.7802	1.421	2.139	0.183	9.725	5.93104	4.14126	8.49094	444	5107	33	2431	2.37003e-22	4.7282e-20	mi_significant	0.773131	21.6252	2.7279	2.464	2.992	0.135	20.279	0	-0.0496	-0.056	-0.043	0.003	-15.153	0	TRUE
Varicose veins of lower extremity	circulatory system	0.4653	-0.487	1.417	0.486	0.958	1.59249	0.614467	4.12473	17	5534	10	2454	0.33809	0.685553	not_significant	0.202077	0.470968	2.8639	2.602	3.125	0.133	21.465	0	-0.0513	-0.058	-0.045	0.003	-15.806	0	TRUE
Varicose veins of lower extremity, symptomtic	circulatory system	1.1358	-0.136	2.408	0.649	1.75	3.11366	0.872843	11.1117	15	5536	10	2454	0.0800415	0.337358	not_significant	0.493272	1.09668	2.8688	2.607	3.131	0.134	21.488	0	-0.0515	-0.058	-0.045	0.003	-15.84	0	TRUE
Vascular disorders of kidney/hypertrophy	genitourinary	1.021	-1.12	3.162	1.092	0.935	2.77597	0.32628	23.6178	10	5541	10	2454	0.34999	0.693989	not_significant	0.443415	0.455944	2.8609	2.599	3.122	0.133	21.447	0	-0.0513	-0.058	-0.045	0.003	-15.787	0	TRUE
Vascular disorders of skin	dermatologic	-1.0684	-3.031	0.894	1.001	-1.067	0.343558	0.0482673	2.44489	10	5541	10	2454	0.285889	0.632548	not_significant	-0.464	0.543803	2.8639	2.602	3.125	0.133	21.465	0	-0.0513	-0.058	-0.045	0.003	-15.798	0	TRUE
Vascular hamartomas and non-neoplastic nevi	neoplasms	-1.9759	-4.252	0.3	1.161	-1.701	0.138636	0.0142357	1.34986	10	5541	10	2454	0.0888513	0.364229	not_significant	-0.858122	1.05134	2.8633	2.602	3.125	0.133	21.463	0	-0.0513	-0.058	-0.045	0.003	-15.791	0	TRUE
Vascular insufficiency of intestine	circulatory system	-0.4351	-2.446	1.576	1.026	-0.424	0.6472	0.0866395	4.83557	10	5541	10	2454	0.67155	0.902719	not_significant	-0.188962	0.172922	2.86	2.599	3.121	0.133	21.441	0	-0.0512	-0.058	-0.045	0.003	-15.772	0	TRUE
Venereal diseases due to Chlamydia trachomatis	infectious diseases	-0.8884	-3.672	1.895	1.42	-0.626	0.411313	0.0254256	6.65255	10	5541	10	2454	0.531599	0.843627	not_significant	-0.385827	0.274415	2.8617	2.6	3.123	0.133	21.455	0	-0.0513	-0.058	-0.045	0.003	-15.787	0	TRUE
Ventral hernia	digestive	0.8018	-0.339	1.943	0.582	1.377	2.22955	0.712482	6.97966	14	5537	10	2454	0.168367	0.492317	not_significant	0.348217	0.773742	2.8678	2.606	3.13	0.134	21.479	0	-0.0515	-0.058	-0.045	0.003	-15.826	0	TRUE
Viral Enteritis	infectious diseases	-0.6813	-1.515	0.152	0.425	-1.602	0.505959	0.219808	1.16416	13	5538	10	2454	0.10921	0.397339	not_significant	-0.295885	0.961737	2.8671	2.605	3.129	0.133	21.482	0	-0.0513	-0.058	-0.045	0.003	-15.809	0	TRUE
Viral hepatitis	infectious diseases	-0.0048	-1.35	1.34	0.686	-0.007	0.995212	0.25924	3.81904	10	5541	10	2454	0.994383	0.998476	not_significant	-0.00208461	0.00244635	2.8611	2.6	3.123	0.133	21.447	0	-0.0512	-0.058	-0.045	0.003	-15.783	0	TRUE
Viral hepatitis A	infectious diseases	-1.8125	-4.09	0.465	1.162	-1.56	0.163246	0.0167392	1.59201	10	5541	10	2454	0.118842	0.415948	not_significant	-0.787159	0.925028	2.8609	2.599	3.122	0.133	21.448	0	-0.0512	-0.058	-0.045	0.003	-15.774	0	TRUE
Viral hepatitis B	infectious diseases	0.2204	-0.458	0.899	0.346	0.636	1.24658	0.632547	2.45714	31	5520	12	2452	0.524584	0.840695	not_significant	0.0957185	0.280185	2.8613	2.6	3.123	0.133	21.451	0	-0.0513	-0.058	-0.045	0.003	-15.792	0	TRUE
Viral hepatitis C	infectious diseases	0.8297	-0.474	2.133	0.665	1.247	2.29263	0.622507	8.44015	11	5540	10	2454	0.212237	0.55348	not_significant	0.360334	0.67318	2.8661	2.604	3.128	0.133	21.473	0	-0.0514	-0.058	-0.045	0.003	-15.818	0	TRUE
Viral infection	infectious diseases	-0.6156	-0.905	-0.326	0.148	-4.171	0.540317	0.404542	0.721805	110	5441	90	2374	3.02647e-05	0.00069667	con_significant	-0.267352	4.51906	2.8743	2.612	3.136	0.134	21.513	0	-0.0512	-0.058	-0.045	0.003	-15.739	0	TRUE
Viral pneumonia	respiratory	0.083	-1.351	1.517	0.732	0.113	1.08654	0.258981	4.55853	10	5541	10	2454	0.909704	0.972246	not_significant	0.0360464	0.0410999	2.861	2.6	3.122	0.133	21.452	0	-0.0512	-0.058	-0.045	0.003	-15.786	0	TRUE
Viral warts & HPV	infectious diseases	-0.9203	-1.183	-0.658	0.134	-6.872	0.3984	0.306358	0.517886	113	5438	128	2336	6.33998e-12	5.42069e-10	con_significant	-0.399681	11.1979	2.8702	2.608	3.132	0.134	21.478	0	-0.0507	-0.057	-0.044	0.003	-15.589	0	TRUE
Viremia, NOS	infectious diseases	-0.5396	-1.006	-0.073	0.238	-2.268	0.582981	0.365679	0.929601	43	5508	32	2432	0.0233289	0.152273	not_significant	-0.234345	1.63211	2.868	2.606	3.13	0.133	21.49	0	-0.0513	-0.058	-0.045	0.003	-15.792	0	TRUE
Visual disturbances	sense organs	-0.1451	-0.546	0.256	0.204	-0.71	0.864936	0.579262	1.29175	69	5482	41	2423	0.477845	0.803835	not_significant	-0.0630161	0.320713	2.8589	2.597	3.12	0.133	21.43	0	-0.0511	-0.058	-0.045	0.003	-15.736	0	TRUE
Visual field defects	sense organs	0.1569	-0.848	1.162	0.513	0.306	1.16988	0.428271	3.19632	14	5537	10	2454	0.759579	0.92077	not_significant	0.0681408	0.119427	2.8612	2.6	3.123	0.133	21.455	0	-0.0513	-0.058	-0.045	0.003	-15.79	0	TRUE
Vitamin B-complex deficiencies	endocrine/metabolic	0.5182	-0.03	1.066	0.28	1.853	1.679	0.970446	2.90374	62	5489	17	2447	0.0639408	0.297521	not_significant	0.225051	1.19422	2.8585	2.597	3.12	0.133	21.427	0	-0.0513	-0.058	-0.045	0.003	-15.795	0	TRUE
Vitamin D deficiency	endocrine/metabolic	0.2744	0.064	0.485	0.107	2.56	1.31574	1.06609	1.62418	366	5185	130	2334	0.0104701	0.0849247	not_significant	0.11917	1.98005	2.8528	2.591	3.114	0.133	21.375	0	-0.0514	-0.058	-0.045	0.003	-15.831	0	TRUE
Vitamin deficiency	endocrine/metabolic	0.0601	-1.289	1.409	0.688	0.087	1.06194	0.275546	4.09186	10	5541	10	2454	0.930343	0.978277	not_significant	0.0261011	0.0313569	2.8609	2.599	3.122	0.133	21.448	0	-0.0512	-0.058	-0.045	0.003	-15.784	0	TRUE
Vitiligo	dermatologic	-0.6624	-1.428	0.103	0.391	-1.696	0.515612	0.239788	1.10849	14	5537	13	2451	0.0899002	0.366258	not_significant	-0.287677	1.04624	2.8612	2.6	3.123	0.133	21.449	0	-0.0512	-0.058	-0.045	0.003	-15.764	0	TRUE
Voice disturbance	respiratory	0.0913	-0.548	0.73	0.326	0.28	1.0956	0.578105	2.07508	31	5520	15	2449	0.779463	0.934887	not_significant	0.0396511	0.108204	2.8618	2.6	3.123	0.133	21.454	0	-0.0513	-0.058	-0.045	0.003	-15.787	0	TRUE
Wheezing	respiratory	-0.5844	-1.144	-0.025	0.285	-2.047	0.55744	0.318542	0.97531	29	5522	25	2439	0.0406301	0.223093	not_significant	-0.253802	1.39115	2.8607	2.599	3.122	0.133	21.429	0	-0.0511	-0.058	-0.045	0.003	-15.733	0	TRUE

## Sheet: before_sdoh
phenotype	phecode_category	coef_has_phenotype	ci_lb_has_phenotype	ci_ub_has_phenotype	std err_has_phenotype	z_has_phenotype	odds_ratio_has_phenotype	ci_lb_or_has_phenotype	ci_ub_or_has_phenotype	Count_mi	Count_r_mi	Count_con	Count_r_con	pval_has_phenotype	pval_BH_adj_has_phenotype	significance_bh	log10_OR_has_phenotype	-log10_pval_has_phenotype	coef_Intercept	ci_lb_Intercept	ci_ub_Intercept	std err_Intercept	z_Intercept	pval_Intercept	coef_mi_or_vas_est_age	ci_lb_mi_or_vas_est_age	ci_ub_mi_or_vas_est_age	std err_mi_or_vas_est_age	z_mi_or_vas_est_age	pval_mi_or_vas_est_age	coef_ethnicity[T.Not Hispanic or Latino]	ci_lb_ethnicity[T.Not Hispanic or Latino]	ci_ub_ethnicity[T.Not Hispanic or Latino]	std err_ethnicity[T.Not Hispanic or Latino]	z_ethnicity[T.Not Hispanic or Latino]	pval_ethnicity[T.Not Hispanic or Latino]	coef_ethnicity[T.No matching concept]	ci_lb_ethnicity[T.No matching concept]	ci_ub_ethnicity[T.No matching concept]	std err_ethnicity[T.No matching concept]	z_ethnicity[T.No matching concept]	pval_ethnicity[T.No matching concept]	coef_race[T.No matching concept]	ci_lb_race[T.No matching concept]	ci_ub_race[T.No matching concept]	std err_race[T.No matching concept]	z_race[T.No matching concept]	pval_race[T.No matching concept]	coef_race[T.Asian]
Abdominal aortic aneurysm	circulatory system	0.2174	-2.323	2.758	1.296	0.168	1.24284	0.0979792	15.7683	10	5541	10	2454	0.866782	0.963263	not_significant	0.0944156	0.0620901	2.723	1.529	3.917	0.609	4.469	0	-0.0466	-0.053	-0.04	0.003	-14.087	0	0.8181	0.634	1.002	0.094	8.712	0	0.808	0.589	1.027	0.112	7.228	0	-0.5203	-1.687	0.646	0.595	-0.874	0.382	0.0669
Abdominal hernia	digestive	0.625	-0.758	2.008	0.706	0.886	1.86825	0.468603	7.44841	10	5541	10	2454	0.375678	0.767383	not_significant	0.271434	0.425184	2.7261	1.532	3.92	0.609	4.474	0	-0.0467	-0.053	-0.04	0.003	-14.104	0	0.8178	0.634	1.002	0.094	8.707	0	0.8071	0.588	1.026	0.112	7.22	0	-0.5205	-1.687	0.646	0.595	-0.874	0.382	0.0669
Abdominal pain	symptoms	-0.1674	-0.33	-0.004	0.083	-2.013	0.845861	0.718924	0.996008	489	5062	287	2177	0.0441333	0.266806	not_significant	-0.0727009	1.35523	2.7447	1.552	3.937	0.608	4.512	0	-0.0463	-0.053	-0.04	0.003	-14.007	0	0.8107	0.626	0.995	0.094	8.625	0	0.7921	0.572	1.012	0.112	7.068	0	-0.5306	-1.695	0.634	0.594	-0.893	0.372	0.0582
Abnormal arterial blood gases	symptoms	-0.8674	-3.309	1.574	1.246	-0.696	0.420042	0.0365527	4.82591	10	5541	10	2454	0.486179	0.821781	not_significant	-0.376707	0.313204	2.7193	1.525	3.913	0.609	4.463	0	-0.0465	-0.053	-0.04	0.003	-14.059	0	0.819	0.635	1.003	0.094	8.72	0	0.8078	0.589	1.027	0.112	7.227	0	-0.5195	-1.686	0.647	0.595	-0.873	0.383	0.0668
Abnormal coagulation profile	hematopoietic	1.418	-0.097	2.933	0.773	1.834	4.12885	0.907556	18.7839	14	5537	10	2454	0.0666265	0.324195	not_significant	0.61583	1.17635	2.7174	1.523	3.912	0.609	4.459	0	-0.0465	-0.053	-0.04	0.003	-14.06	0	0.8238	0.64	1.008	0.094	8.762	0	0.8148	0.596	1.034	0.112	7.284	0	-0.5241	-1.691	0.643	0.595	-0.88	0.379	0.0637
Abnormal electrocardiogram [ECG] [EKG]	circulatory system	-0.2802	-0.576	0.016	0.151	-1.853	0.755633	0.562142	1.01613	120	5431	92	2372	0.0638267	0.320911	not_significant	-0.121689	1.195	2.7029	1.509	3.897	0.609	4.438	0	-0.0461	-0.053	-0.04	0.003	-13.882	0	0.8158	0.632	1	0.094	8.687	0	0.8007	0.582	1.02	0.112	7.16	0	-0.5124	-1.679	0.654	0.595	-0.861	0.389	0.0765
Abnormal findings examination of lungs	respiratory	0.5548	0.2	0.91	0.181	3.063	1.74159	1.2214	2.48432	130	5421	49	2415	0.00218783	0.0308098	mi_significant	0.240947	2.65999	2.7335	1.535	3.932	0.612	4.469	0	-0.0474	-0.054	-0.041	0.003	-14.283	0	0.828	0.644	1.013	0.094	8.796	0	0.8238	0.604	1.043	0.112	7.352	0	-0.5158	-1.687	0.656	0.598	-0.863	0.388	0.0693
Abnormal findings on exam of gastrointestinal tract/ abdominal area	digestive	0.4518	-0.273	1.176	0.37	1.222	1.57114	0.761093	3.24138	31	5520	11	2453	0.22175	0.609043	not_significant	0.196214	0.654137	2.7203	1.526	3.915	0.609	4.463	0	-0.0466	-0.053	-0.04	0.003	-14.083	0	0.8234	0.639	1.008	0.094	8.757	0	0.8149	0.596	1.034	0.112	7.28	0	-0.5247	-1.692	0.642	0.595	-0.881	0.378	0.0627
Abnormal findings on study of brain and/or nervous system	neurological	0.1649	-1.616	1.946	0.909	0.181	1.17928	0.198692	7.00063	10	5541	10	2454	0.856027	0.961153	not_significant	0.0716152	0.0675124	2.7235	1.529	3.918	0.609	4.47	0	-0.0466	-0.053	-0.04	0.003	-14.085	0	0.8179	0.634	1.002	0.094	8.708	0	0.808	0.589	1.027	0.112	7.229	0	-0.5206	-1.687	0.646	0.595	-0.874	0.382	0.0671
Abnormal function study of cardiovascular system	circulatory system	-0.2414	-1.415	0.932	0.599	-0.403	0.785527	0.242926	2.53958	10	5541	10	2454	0.686652	0.900925	not_significant	-0.104839	0.163264	2.7191	1.525	3.913	0.609	4.463	0	-0.0465	-0.053	-0.04	0.003	-14.033	0	0.8181	0.634	1.002	0.094	8.711	0	0.8077	0.589	1.027	0.112	7.226	0	-0.52	-1.687	0.647	0.595	-0.874	0.382	0.0679
Abnormal granulation tissue	dermatologic	-0.5648	-2.417	1.288	0.945	-0.598	0.568474	0.0891888	3.62553	10	5541	10	2454	0.550106	0.857259	not_significant	-0.24529	0.259553	2.7252	1.531	3.919	0.609	4.473	0	-0.0466	-0.053	-0.04	0.003	-14.096	0	0.8164	0.632	1.001	0.094	8.688	0	0.8057	0.586	1.025	0.112	7.203	0	-0.5189	-1.686	0.648	0.595	-0.872	0.383	0.0683
Abnormal heart sounds	circulatory system	-0.1763	-0.789	0.436	0.312	-0.564	0.838366	0.454299	1.54651	30	5521	19	2445	0.57253	0.857259	not_significant	-0.0765661	0.242202	2.7199	1.526	3.914	0.609	4.464	0	-0.0465	-0.053	-0.04	0.003	-14.06	0	0.8184	0.634	1.002	0.094	8.715	0	0.8076	0.589	1.027	0.112	7.225	0	-0.5194	-1.686	0.647	0.595	-0.872	0.383	0.0683
Abnormal involuntary movements	neurological	-0.1899	-0.694	0.314	0.257	-0.739	0.827042	0.499574	1.36889	48	5503	27	2437	0.459863	0.808436	not_significant	-0.0824725	0.337372	2.7271	1.534	3.92	0.609	4.48	0	-0.0466	-0.053	-0.04	0.003	-14.076	0	0.8183	0.634	1.002	0.094	8.714	0	0.8068	0.588	1.026	0.112	7.218	0	-0.5245	-1.69	0.641	0.595	-0.882	0.378	0.0633
Abnormal results of function study of kidney	genitourinary	0.4592	-0.52	1.438	0.499	0.919	1.58281	0.594521	4.21226	16	5535	10	2454	0.357915	0.753195	not_significant	0.199428	0.44622	2.7252	1.531	3.919	0.609	4.473	0	-0.0466	-0.053	-0.04	0.003	-14.101	0	0.818	0.634	1.002	0.094	8.71	0	0.8094	0.59	1.029	0.112	7.24	0	-0.522	-1.689	0.645	0.595	-0.877	0.381	0.0663
Abnormal results of function study of liver	digestive	-0.5148	-1.046	0.017	0.271	-1.898	0.59762	0.35134	1.01715	36	5515	28	2436	0.0576949	0.309525	not_significant	-0.223575	1.23886	2.7443	1.552	3.936	0.608	4.512	0	-0.0464	-0.053	-0.04	0.003	-14.035	0	0.8151	0.631	0.999	0.094	8.678	0	0.8037	0.585	1.023	0.112	7.189	0	-0.5415	-1.706	0.623	0.594	-0.911	0.362	0.0487
Abnormal results of function study of pulmonary system	respiratory	1.0765	-0.177	2.33	0.64	1.683	2.93439	0.83778	10.2779	18	5533	10	2454	0.0923782	0.389992	not_significant	0.467518	1.03443	2.721	1.527	3.915	0.609	4.466	0	-0.0465	-0.053	-0.04	0.003	-14.066	0	0.8168	0.633	1.001	0.094	8.696	0	0.8091	0.59	1.028	0.112	7.238	0	-0.5219	-1.689	0.645	0.595	-0.877	0.381	0.0664
Abnormal results of function study of thyroid	endocrine/metabolic	0.4459	-0.45	1.342	0.457	0.975	1.5619	0.637628	3.82669	25	5526	10	2454	0.32937	0.732817	not_significant	0.193652	0.482316	2.7261	1.532	3.92	0.609	4.474	0	-0.0467	-0.053	-0.04	0.003	-14.105	0	0.8182	0.634	1.002	0.094	8.712	0	0.8091	0.59	1.028	0.112	7.238	0	-0.522	-1.689	0.645	0.595	-0.877	0.381	0.0638
Abnormal results of other function studies (bladder, pancreas, placenta, spleen, etc)	symptoms	0.4334	-0.915	1.781	0.688	0.63	1.54249	0.400517	5.93579	10	5541	10	2454	0.528597	0.857259	not_significant	0.188223	0.276875	2.7236	1.529	3.918	0.609	4.47	0	-0.0466	-0.053	-0.04	0.003	-14.092	0	0.819	0.635	1.003	0.094	8.72	0	0.8098	0.591	1.029	0.112	7.242	0	-0.5219	-1.689	0.645	0.595	-0.877	0.381	0.0655
Abnormal spermatozoa	genitourinary	3.6733	2.532	4.815	0.583	6.306	39.3817	12.5786	123.347	276	5275	10	2454	2.87029e-10	2.86311e-08	mi_significant	1.59529	9.54207	2.5997	1.395	3.805	0.615	4.228	0	-0.0454	-0.052	-0.039	0.003	-13.622	0	0.819	0.633	1.005	0.095	8.644	0	0.7933	0.573	1.014	0.113	7.045	0	-0.4746	-1.653	0.704	0.601	-0.789	0.43	0.0846
Abnormality of red blood cells	hematopoietic	0.0401	-2.263	2.343	1.175	0.034	1.04091	0.104038	10.4124	10	5541	10	2454	0.972794	0.994393	not_significant	0.0174152	0.0119791	2.7225	1.528	3.917	0.609	4.468	0	-0.0466	-0.053	-0.04	0.003	-14.084	0	0.8182	0.634	1.002	0.094	8.712	0	0.808	0.589	1.027	0.112	7.228	0	-0.5204	-1.687	0.646	0.595	-0.874	0.382	0.067
Acid-base balance disorder	endocrine/metabolic	-0.8877	-2.907	1.132	1.03	-0.861	0.411601	0.0546394	3.10185	10	5541	10	2454	0.388989	0.779084	not_significant	-0.385523	0.410063	2.7231	1.529	3.917	0.609	4.469	0	-0.0466	-0.053	-0.04	0.003	-14.09	0	0.8185	0.634	1.003	0.094	8.715	0	0.808	0.589	1.027	0.112	7.229	0	-0.5203	-1.687	0.647	0.595	-0.874	0.382	0.0675
Acidosis	endocrine/metabolic	-0.0276	-0.937	0.882	0.464	-0.06	0.972777	0.391801	2.41573	15	5536	10	2454	0.952526	0.988213	not_significant	-0.0119865	0.021123	2.7226	1.528	3.917	0.609	4.469	0	-0.0466	-0.053	-0.04	0.003	-14.086	0	0.8181	0.634	1.002	0.094	8.711	0	0.8079	0.589	1.027	0.112	7.227	0	-0.5202	-1.687	0.647	0.595	-0.874	0.382	0.0672
Acne	dermatologic	0.0797	-0.271	0.431	0.179	0.445	1.08296	0.762616	1.5388	125	5426	49	2415	0.65638	0.885263	not_significant	0.0346133	0.182844	2.7123	1.517	3.908	0.61	4.446	0	-0.0465	-0.053	-0.04	0.003	-14.067	0	0.8191	0.635	1.003	0.094	8.719	0	0.8095	0.59	1.029	0.112	7.239	0	-0.5136	-1.682	0.654	0.596	-0.862	0.389	0.0727
Acquired absence of organs		-0.6774	-1.22	-0.135	0.277	-2.447	0.507936	0.29523	0.873716	28	5523	30	2434	0.014406	0.121437	not_significant	-0.294191	1.84146	2.7138	1.52	3.908	0.609	4.455	0	-0.0464	-0.053	-0.04	0.003	-14.016	0	0.8184	0.634	1.003	0.094	8.712	0	0.8015	0.582	1.021	0.112	7.168	0	-0.5121	-1.679	0.654	0.595	-0.86	0.39	0.0715
Acquired acanthosis nigricans	dermatologic	0.7753	-1.372	2.922	1.095	0.708	2.17124	0.253599	18.5784	10	5541	10	2454	0.479089	0.818026	not_significant	0.336709	0.319584	2.7193	1.525	3.914	0.609	4.463	0	-0.0465	-0.053	-0.04	0.003	-14.063	0	0.8192	0.635	1.003	0.094	8.721	0	0.8091	0.59	1.028	0.112	7.236	0	-0.5214	-1.688	0.645	0.595	-0.876	0.381	0.0664
Acquired coagulation factor deficiency	hematopoietic	1.4071	-0.73	3.544	1.09	1.29	4.08409	0.481909	34.6051	10	5541	10	2454	0.196901	0.57195	not_significant	0.611096	0.705753	2.7235	1.529	3.918	0.609	4.47	0	-0.0466	-0.053	-0.04	0.003	-14.087	0	0.8173	0.633	1.001	0.094	8.702	0	0.8078	0.589	1.027	0.112	7.226	0	-0.5204	-1.687	0.646	0.595	-0.874	0.382	0.0675
Acquired deformities of finger	musculoskeletal	-0.7007	-1.75	0.348	0.535	-1.309	0.496238	0.173774	1.41623	10	5541	10	2454	0.19047	0.565106	not_significant	-0.30431	0.720172	2.7199	1.526	3.914	0.609	4.464	0	-0.0465	-0.053	-0.04	0.003	-14.063	0	0.8185	0.634	1.003	0.094	8.714	0	0.8076	0.589	1.027	0.112	7.225	0	-0.52	-1.687	0.647	0.595	-0.874	0.382	0.0679
Acquired deformities of forearm	musculoskeletal	0.5376	-2.341	3.416	1.469	0.366	1.71189	0.0962314	30.4474	10	5541	10	2454	0.714327	0.91038	not_significant	0.233477	0.146103	2.7228	1.529	3.917	0.609	4.469	0	-0.0466	-0.053	-0.04	0.003	-14.09	0	0.819	0.635	1.003	0.094	8.719	0	0.8086	0.589	1.028	0.112	7.233	0	-0.5205	-1.687	0.646	0.595	-0.874	0.382	0.0664
Acquired foot deformities	musculoskeletal	-0.4362	-1.502	0.629	0.544	-0.803	0.646488	0.222684	1.87573	10	5541	10	2454	0.422262	0.794801	not_significant	-0.189439	0.374418	2.7213	1.527	3.915	0.609	4.466	0	-0.0465	-0.053	-0.04	0.003	-14.076	0	0.8182	0.634	1.002	0.094	8.713	0	0.8074	0.588	1.026	0.112	7.223	0	-0.5198	-1.687	0.647	0.595	-0.873	0.383	0.0679
Acquired hemolytic anemias	hematopoietic	0.3807	-2.031	2.793	1.231	0.309	1.46331	0.131204	16.3299	10	5541	10	2454	0.757037	0.924806	not_significant	0.165336	0.120883	2.724	1.53	3.918	0.609	4.47	0	-0.0466	-0.053	-0.04	0.003	-14.087	0	0.8187	0.635	1.003	0.094	8.716	0	0.8086	0.59	1.028	0.112	7.233	0	-0.5208	-1.688	0.646	0.595	-0.875	0.382	0.0663
Acquired hypothyroidism	endocrine/metabolic	0.2156	-0.517	0.948	0.374	0.577	1.24061	0.596307	2.58054	28	5523	12	2452	0.563921	0.857259	not_significant	0.0936339	0.248782	2.7258	1.532	3.92	0.609	4.473	0	-0.0467	-0.053	-0.04	0.003	-14.099	0	0.8181	0.634	1.002	0.094	8.709	0	0.8083	0.589	1.027	0.112	7.231	0	-0.5214	-1.688	0.645	0.595	-0.876	0.381	0.0656
Acquired spondylolisthesis	musculoskeletal	-0.0699	-1.114	0.975	0.533	-0.131	0.932487	0.328243	2.65117	11	5540	10	2454	0.895693	0.975065	not_significant	-0.0303572	0.0478411	2.7225	1.528	3.917	0.609	4.468	0	-0.0466	-0.053	-0.04	0.003	-14.085	0	0.818	0.634	1.002	0.094	8.709	0	0.8081	0.589	1.027	0.112	7.229	0	-0.5202	-1.687	0.647	0.595	-0.874	0.382	0.0673
Acromegaly and gigantism	endocrine/metabolic	-0.8218	-2.843	1.199	1.031	-0.797	0.43964	0.0582507	3.3168	10	5541	10	2454	0.425509	0.794801	not_significant	-0.356903	0.371091	2.7236	1.53	3.918	0.609	4.47	0	-0.0466	-0.053	-0.04	0.003	-14.091	0	0.8174	0.633	1.001	0.094	8.702	0	0.8068	0.588	1.026	0.112	7.216	0	-0.5195	-1.686	0.647	0.595	-0.873	0.383	0.0681
Actinic keratosis	dermatologic	-0.6127	-1.048	-0.178	0.222	-2.76	0.541886	0.350638	0.836942	36	5515	58	2406	0.00578001	0.0665257	not_significant	-0.266092	2.23807	2.6769	1.483	3.871	0.609	4.396	0	-0.0455	-0.052	-0.039	0.003	-13.666	0	0.8207	0.637	1.005	0.094	8.741	0	0.8105	0.591	1.029	0.112	7.253	0	-0.516	-1.682	0.65	0.595	-0.868	0.386	0.0684
Acute and chronic tonsillitis	respiratory	-0.765	-2.755	1.225	1.015	-0.753	0.465334	0.063609	3.40417	10	5541	10	2454	0.451166	0.807899	not_significant	-0.332235	0.345664	2.7241	1.53	3.918	0.609	4.471	0	-0.0466	-0.053	-0.04	0.003	-14.093	0	0.8175	0.633	1.002	0.094	8.705	0	0.8078	0.589	1.027	0.112	7.227	0	-0.5195	-1.686	0.647	0.595	-0.873	0.383	0.0673
Acute and subacute necrosis of liver	digestive	-0.5368	-1.927	0.853	0.709	-0.757	0.584616	0.145584	2.34668	10	5541	10	2454	0.448999	0.807899	not_significant	-0.233129	0.347754	2.7221	1.528	3.916	0.609	4.468	0	-0.0466	-0.053	-0.04	0.003	-14.084	0	0.8186	0.635	1.003	0.094	8.717	0	0.8072	0.588	1.026	0.112	7.221	0	-0.5192	-1.686	0.648	0.595	-0.872	0.383	0.0672
Acute appendicitis	digestive	-0.9532	-1.807	-0.099	0.436	-2.188	0.385505	0.164146	0.905743	11	5540	12	2452	0.0286641	0.194612	not_significant	-0.41397	1.54266	2.7708	1.578	3.963	0.608	4.555	0	-0.0465	-0.053	-0.04	0.003	-14.057	0	0.8188	0.635	1.003	0.094	8.718	0	0.8092	0.59	1.028	0.112	7.237	0	-0.5696	-1.735	0.595	0.594	-0.958	0.338	0.019
Acute bronchitis and bronchiolitis	respiratory	-0.684	-0.985	-0.383	0.153	-4.46	0.504595	0.373439	0.681813	101	5450	97	2367	8.17901e-06	0.000326343	con_significant	-0.297057	5.0873	2.6842	1.491	3.877	0.609	4.409	0	-0.0456	-0.052	-0.039	0.003	-13.769	0	0.8155	0.631	1	0.094	8.679	0	0.8101	0.591	1.029	0.112	7.239	0	-0.5052	-1.671	0.66	0.595	-0.849	0.396	0.0939
Acute bronchospasm	respiratory	-1.0876	-1.867	-0.308	0.398	-2.734	0.337024	0.154587	0.734915	11	5540	19	2445	0.00626077	0.0706994	not_significant	-0.472339	2.20337	2.7179	1.524	3.912	0.609	4.462	0	-0.0464	-0.053	-0.04	0.003	-14.029	0	0.8134	0.629	0.998	0.094	8.649	0	0.8024	0.583	1.022	0.112	7.173	0	-0.5139	-1.68	0.652	0.595	-0.864	0.388	0.0723
Acute cystitis	genitourinary	1.1283	-0.053	2.31	0.603	1.871	3.0904	0.94838	10.0744	14	5537	10	2454	0.0613059	0.313819	not_significant	0.490014	1.2125	2.7373	1.543	3.932	0.61	4.49	0	-0.047	-0.053	-0.04	0.003	-14.169	0	0.82	0.636	1.004	0.094	8.726	0	0.8113	0.592	1.03	0.112	7.254	0	-0.523	-1.69	0.644	0.596	-0.878	0.38	0.0635
Acute dermatitis due to solar radiation	dermatologic	0.2739	-1.139	1.686	0.721	0.38	1.31508	0.320139	5.39785	10	5541	10	2454	0.703905	0.909907	not_significant	0.118953	0.152486	2.7226	1.528	3.917	0.609	4.469	0	-0.0466	-0.053	-0.04	0.003	-14.086	0	0.8179	0.634	1.002	0.094	8.709	0	0.8081	0.589	1.027	0.112	7.229	0	-0.5208	-1.688	0.646	0.595	-0.875	0.382	0.0671
Acute gastritis	digestive	0.2304	-0.758	1.219	0.504	0.457	1.2591	0.468603	3.3838	16	5535	10	2454	0.647848	0.882735	not_significant	0.100061	0.188527	2.7233	1.529	3.917	0.609	4.47	0	-0.0466	-0.053	-0.04	0.003	-14.09	0	0.818	0.634	1.002	0.094	8.711	0	0.8081	0.589	1.027	0.112	7.229	0	-0.5207	-1.688	0.646	0.595	-0.875	0.382	0.0663
Acute laryngitis and tracheitis	respiratory	2.1547	-0.061	4.37	1.13	1.906	8.6253	0.940823	79.0436	10	5541	10	2454	0.0566223	0.309485	not_significant	0.935774	1.24701	2.7308	1.536	3.925	0.61	4.48	0	-0.0468	-0.053	-0.04	0.003	-14.157	0	0.8217	0.637	1.006	0.094	8.741	0	0.8085	0.589	1.028	0.112	7.23	0	-0.5207	-1.688	0.647	0.596	-0.874	0.382	0.0642
Acute osteomyelitis	musculoskeletal	1.4804	-0.839	3.8	1.184	1.251	4.3947	0.432142	44.7012	10	5541	10	2454	0.211011	0.595707	not_significant	0.64293	0.675696	2.725	1.531	3.92	0.609	4.471	0	-0.0467	-0.053	-0.04	0.003	-14.11	0	0.8217	0.638	1.006	0.094	8.746	0	0.8112	0.592	1.03	0.112	7.255	0	-0.5218	-1.689	0.645	0.595	-0.876	0.381	0.0634
Acute pain	neurological	-0.7254	-1.035	-0.416	0.158	-4.589	0.484131	0.355226	0.65968	83	5468	97	2367	4.44453e-06	0.000183452	con_significant	-0.315037	5.35217	2.7137	1.521	3.907	0.609	4.458	0	-0.0462	-0.053	-0.04	0.003	-13.958	0	0.8063	0.622	0.99	0.094	8.578	0	0.785	0.566	1.004	0.112	7.016	0	-0.4992	-1.665	0.667	0.595	-0.839	0.401	0.0845
Acute pancreatitis	digestive	-0.6074	-1.569	0.354	0.49	-1.239	0.544765	0.208253	1.42476	10	5541	10	2454	0.215528	0.604207	not_significant	-0.26379	0.666495	2.7265	1.532	3.921	0.609	4.475	0	-0.0467	-0.053	-0.04	0.003	-14.105	0	0.8164	0.632	1.001	0.094	8.692	0	0.8062	0.587	1.025	0.112	7.212	0	-0.519	-1.686	0.648	0.595	-0.872	0.383	0.0695
Acute pericarditis	circulatory system	0.1878	-2.045	2.42	1.139	0.165	1.20659	0.12938	11.2459	10	5541	10	2454	0.869059	0.964099	not_significant	0.0815605	0.0609509	2.722	1.528	3.916	0.609	4.467	0	-0.0466	-0.053	-0.04	0.003	-14.079	0	0.8183	0.634	1.002	0.094	8.713	0	0.8082	0.589	1.027	0.112	7.23	0	-0.5205	-1.687	0.646	0.595	-0.874	0.382	0.0668
Acute pharyngitis	respiratory	-0.5863	-0.801	-0.372	0.109	-5.355	0.556382	0.44888	0.689354	221	5330	176	2288	8.5465e-08	4.8715e-06	con_significant	-0.254627	7.06821	2.7328	1.539	3.926	0.609	4.488	0	-0.0466	-0.053	-0.04	0.003	-14.086	0	0.8015	0.617	0.986	0.094	8.518	0	0.7909	0.571	1.01	0.112	7.064	0	-0.489	-1.655	0.677	0.595	-0.822	0.411	0.1105
Acute posthemorrhagic anemia	hematopoietic	-0.2098	-0.872	0.453	0.338	-0.621	0.810746	0.418114	1.57302	21	5530	18	2446	0.534713	0.857259	not_significant	-0.091115	0.271879	2.7193	1.525	3.913	0.609	4.463	0	-0.0465	-0.053	-0.04	0.003	-14.05	0	0.8178	0.634	1.002	0.094	8.708	0	0.8065	0.587	1.026	0.112	7.214	0	-0.5189	-1.686	0.648	0.595	-0.872	0.383	0.0679
Acute prostatitis	genitourinary	0.5597	-0.642	1.761	0.613	0.913	1.75015	0.526239	5.81825	10	5541	10	2454	0.361229	0.753195	not_significant	0.243075	0.442217	2.7331	1.538	3.928	0.61	4.484	0	-0.0468	-0.053	-0.04	0.003	-14.111	0	0.8193	0.635	1.003	0.094	8.722	0	0.8086	0.59	1.028	0.112	7.233	0	-0.5223	-1.69	0.645	0.596	-0.877	0.38	0.0659
Acute reaction to stress	mental disorders	-0.2404	-1.091	0.61	0.434	-0.554	0.786313	0.33588	1.84043	16	5535	10	2454	0.579364	0.86042	not_significant	-0.104404	0.237049	2.7223	1.528	3.916	0.609	4.468	0	-0.0466	-0.053	-0.04	0.003	-14.083	0	0.8178	0.634	1.002	0.094	8.709	0	0.8088	0.59	1.028	0.112	7.236	0	-0.52	-1.687	0.647	0.595	-0.873	0.382	0.0683
Acute renal failure	genitourinary	0.3735	-0.155	0.902	0.27	1.385	1.45281	0.856415	2.46453	56	5495	22	2442	0.166174	0.52761	not_significant	0.162209	0.779437	2.7264	1.532	3.921	0.609	4.473	0	-0.0467	-0.053	-0.04	0.003	-14.12	0	0.8224	0.638	1.007	0.094	8.749	0	0.8133	0.594	1.033	0.112	7.269	0	-0.5243	-1.692	0.643	0.596	-0.88	0.379	0.0609
Acute sinusitis	respiratory	-0.6266	-0.872	-0.381	0.125	-5.006	0.534406	0.418114	0.683178	149	5402	145	2319	5.56242e-07	2.66328e-05	con_significant	-0.272129	6.25474	2.7527	1.557	3.948	0.61	4.513	0	-0.0461	-0.053	-0.04	0.003	-13.931	0	0.8112	0.627	0.995	0.094	8.629	0	0.8033	0.584	1.023	0.112	7.178	0	-0.5469	-1.715	0.621	0.596	-0.917	0.359	0.0438
Acute tonsillitis	respiratory	-0.6461	-1.673	0.381	0.524	-1.233	0.524086	0.187683	1.46375	10	5541	10	2454	0.217411	0.605211	not_significant	-0.280598	0.662719	2.7248	1.531	3.919	0.609	4.472	0	-0.0466	-0.053	-0.04	0.003	-14.098	0	0.8173	0.633	1.001	0.094	8.702	0	0.8088	0.59	1.028	0.112	7.234	0	-0.5189	-1.686	0.648	0.595	-0.872	0.383	0.0691
Acute upper respiratory infections of multiple or unspecified sites	respiratory	-0.6308	-0.813	-0.449	0.093	-6.793	0.532166	0.443525	0.638266	306	5245	265	2199	1.09785e-11	1.64266e-09	con_significant	-0.273953	10.9595	2.7633	1.561	3.966	0.614	4.504	0	-0.0458	-0.052	-0.039	0.003	-13.824	0	0.7816	0.597	0.966	0.094	8.288	0	0.771	0.551	0.991	0.112	6.87	0	-0.5214	-1.696	0.654	0.599	-0.87	0.384	0.0852
Acute vascular insufficiency of intestine	circulatory system	1.4071	-0.721	3.535	1.086	1.296	4.08409	0.486266	34.295	10	5541	10	2454	0.194897	0.569005	not_significant	0.611096	0.710194	2.7231	1.529	3.917	0.609	4.469	0	-0.0466	-0.053	-0.04	0.003	-14.085	0	0.8183	0.634	1.002	0.094	8.712	0	0.8096	0.59	1.029	0.112	7.242	0	-0.5219	-1.689	0.645	0.595	-0.877	0.381	0.0669
Acute, but ill-defined cerebrovascular disease	circulatory system	0.3324	-2.083	2.748	1.232	0.27	1.39431	0.124556	15.6114	10	5541	10	2454	0.787368	0.93897	not_significant	0.144359	0.103823	2.7229	1.529	3.917	0.609	4.469	0	-0.0466	-0.053	-0.04	0.003	-14.088	0	0.8181	0.634	1.002	0.094	8.711	0	0.808	0.589	1.027	0.112	7.228	0	-0.5203	-1.687	0.646	0.595	-0.874	0.382	0.0671
Adjustment reaction	mental disorders	-0.1156	-0.499	0.268	0.196	-0.591	0.890831	0.607137	1.30735	80	5471	46	2418	0.554401	0.857259	not_significant	-0.0502044	0.256176	2.7275	1.534	3.921	0.609	4.479	0	-0.0466	-0.053	-0.04	0.003	-14.085	0	0.8173	0.633	1.001	0.094	8.702	0	0.8066	0.587	1.026	0.112	7.214	0	-0.5233	-1.689	0.643	0.595	-0.88	0.379	0.064
Adrenogenital disorders	endocrine/metabolic	1.4423	-0.654	3.539	1.07	1.348	4.23041	0.519962	34.4325	10	5541	10	2454	0.177513	0.54445	not_significant	0.626383	0.75077	2.7208	1.527	3.915	0.609	4.466	0	-0.0465	-0.053	-0.04	0.003	-14.073	0	0.8188	0.635	1.003	0.094	8.718	0	0.808	0.589	1.027	0.112	7.227	0	-0.5216	-1.688	0.645	0.595	-0.876	0.381	0.0655
Adverse drug events and drug allergies	injuries & poisonings	1.1978	-0.319	2.715	0.774	1.548	3.31282	0.726876	15.1046	14	5537	10	2454	0.12172	0.4471	not_significant	0.520198	0.914637	2.7221	1.528	3.916	0.609	4.467	0	-0.0466	-0.053	-0.04	0.003	-14.071	0	0.8196	0.635	1.004	0.094	8.722	0	0.8087	0.59	1.028	0.112	7.233	0	-0.5211	-1.688	0.646	0.595	-0.875	0.381	0.0639
Adverse effects of sedatives or other central nervous system depressants and anesthetics	injuries & poisonings	0.7426	-0.815	2.3	0.795	0.934	2.10139	0.442639	9.97418	10	5541	10	2454	0.350122	0.753195	not_significant	0.322507	0.455781	2.7205	1.526	3.915	0.609	4.465	0	-0.0465	-0.053	-0.04	0.003	-14.074	0	0.8191	0.635	1.003	0.094	8.719	0	0.8099	0.591	1.029	0.112	7.244	0	-0.5217	-1.689	0.645	0.595	-0.876	0.381	0.066
Agorophobia, social phobia, and panic disorder	mental disorders	-0.1549	-0.708	0.398	0.282	-0.549	0.856501	0.492628	1.48884	34	5517	22	2442	0.582739	0.862832	not_significant	-0.0672722	0.234526	2.7236	1.529	3.918	0.609	4.47	0	-0.0466	-0.053	-0.04	0.003	-14.092	0	0.818	0.634	1.002	0.094	8.711	0	0.8071	0.588	1.026	0.112	7.221	0	-0.5196	-1.686	0.647	0.595	-0.873	0.383	0.0678
Alcohol-related disorders	mental disorders	-1.1248	-1.929	-0.32	0.411	-2.74	0.324717	0.145293	0.726149	10	5541	18	2446	0.00614411	0.0700428	not_significant	-0.488494	2.21154	2.718	1.524	3.912	0.609	4.461	0	-0.0465	-0.053	-0.04	0.003	-14.048	0	0.8187	0.635	1.003	0.094	8.715	0	0.8085	0.589	1.028	0.112	7.231	0	-0.5177	-1.684	0.649	0.595	-0.87	0.385	0.0687
Alcoholic liver damage	mental disorders	-1.6528	-3.352	0.047	0.867	-1.906	0.191513	0.0350143	1.04812	10	5541	10	2454	0.0566226	0.309485	not_significant	-0.717802	1.24701	2.7155	1.521	3.91	0.609	4.457	0	-0.0464	-0.053	-0.04	0.003	-14.035	0	0.8198	0.636	1.004	0.094	8.722	0	0.8063	0.587	1.025	0.112	7.212	0	-0.5172	-1.684	0.65	0.595	-0.869	0.385	0.068
Alcoholism	mental disorders	-0.1609	-0.71	0.388	0.28	-0.575	0.851377	0.491644	1.47403	34	5517	24	2440	0.565523	0.857259	not_significant	-0.069878	0.24755	2.7216	1.527	3.916	0.609	4.467	0	-0.0466	-0.053	-0.04	0.003	-14.075	0	0.8176	0.634	1.002	0.094	8.705	0	0.807	0.588	1.026	0.112	7.218	0	-0.519	-1.686	0.648	0.595	-0.872	0.383	0.0679
Alkalosis	endocrine/metabolic	0.1897	-1.506	1.885	0.865	0.219	1.20889	0.221795	6.58635	10	5541	10	2454	0.826442	0.950289	not_significant	0.0823857	0.0827878	2.7218	1.528	3.916	0.609	4.467	0	-0.0466	-0.053	-0.04	0.003	-14.082	0	0.8189	0.635	1.003	0.094	8.714	0	0.8088	0.59	1.028	0.112	7.232	0	-0.5207	-1.688	0.646	0.595	-0.875	0.382	0.0666
Allergic conjunctivitis	sense organs	-0.1708	-0.819	0.478	0.331	-0.516	0.84299	0.440872	1.61285	25	5526	17	2447	0.605734	0.873421	not_significant	-0.0741775	0.217718	2.7207	1.526	3.915	0.609	4.465	0	-0.0465	-0.053	-0.04	0.003	-14.069	0	0.8186	0.635	1.003	0.094	8.716	0	0.8073	0.588	1.026	0.112	7.222	0	-0.5191	-1.686	0.648	0.595	-0.872	0.383	0.0674
Allergic purpura	hematopoietic	-0.1957	-2.625	2.234	1.24	-0.158	0.822259	0.0724398	9.33714	10	5541	10	2454	0.874584	0.965753	not_significant	-0.0849914	0.0581987	2.7229	1.529	3.917	0.609	4.469	0	-0.0466	-0.053	-0.04	0.003	-14.087	0	0.8182	0.634	1.002	0.094	8.713	0	0.8083	0.589	1.027	0.112	7.23	0	-0.5203	-1.687	0.646	0.595	-0.874	0.382	0.067
Allergic reaction to food	injuries & poisonings	-0.0066	-1.228	1.215	0.623	-0.011	0.993422	0.292878	3.37029	10	5541	10	2454	0.991558	0.997741	not_significant	-0.00286634	0.00368201	2.7226	1.528	3.917	0.609	4.469	0	-0.0466	-0.053	-0.04	0.003	-14.085	0	0.8182	0.634	1.002	0.094	8.712	0	0.808	0.589	1.027	0.112	7.228	0	-0.5203	-1.687	0.647	0.595	-0.874	0.382	0.067
Allergic rhinitis	respiratory	-0.5072	-0.671	-0.344	0.083	-6.081	0.602179	0.511197	0.708929	423	5128	313	2151	1.19742e-09	1.10255e-07	con_significant	-0.220274	8.92175	2.7443	1.555	3.933	0.607	4.523	0	-0.0457	-0.052	-0.039	0.003	-13.782	0	0.7993	0.615	0.984	0.094	8.491	0	0.7852	0.566	1.005	0.112	7.011	0	-0.5213	-1.683	0.641	0.593	-0.879	0.379	0.0862
Allergies, other	injuries & poisonings	-0.2385	-0.599	0.122	0.184	-1.297	0.787809	0.549361	1.12975	84	5467	56	2408	0.194585	0.569005	not_significant	-0.103579	0.710891	2.7382	1.541	3.935	0.611	4.482	0	-0.0465	-0.053	-0.04	0.003	-14.042	0	0.8165	0.632	1.001	0.094	8.692	0	0.8052	0.586	1.024	0.112	7.201	0	-0.537	-1.707	0.633	0.597	-0.9	0.368	0.0525
Alopecia	dermatologic	-0.2546	-0.593	0.084	0.173	-1.475	0.775227	0.552667	1.08763	105	5446	59	2405	0.140215	0.485078	not_significant	-0.110571	0.853206	2.7461	1.548	3.944	0.611	4.492	0	-0.0466	-0.053	-0.04	0.003	-14.102	0	0.8197	0.636	1.004	0.094	8.726	0	0.8104	0.591	1.03	0.112	7.248	0	-0.5382	-1.709	0.632	0.597	-0.901	0.368	0.0501
Alopecia Areata	dermatologic	-0.1331	-0.945	0.679	0.414	-0.321	0.875378	0.38868	1.9719	24	5527	10	2454	0.747926	0.921057	not_significant	-0.0578046	0.126141	2.7229	1.529	3.917	0.609	4.469	0	-0.0466	-0.053	-0.04	0.003	-14.088	0	0.8185	0.634	1.003	0.094	8.715	0	0.808	0.589	1.027	0.112	7.229	0	-0.5197	-1.687	0.647	0.595	-0.873	0.383	0.0678
Alpha-1-antitrypsin deficiency	endocrine/metabolic	-1.3239	-3.628	0.98	1.176	-1.126	0.266096	0.0265693	2.66446	10	5541	10	2454	0.26016	0.651489	not_significant	-0.574962	0.584759	2.72	1.526	3.914	0.609	4.464	0	-0.0465	-0.053	-0.04	0.003	-14.068	0	0.8187	0.635	1.003	0.094	8.718	0	0.808	0.589	1.027	0.112	7.23	0	-0.5201	-1.687	0.647	0.595	-0.874	0.382	0.0669
Alteration of consciousness	mental disorders	0.0508	-0.653	0.755	0.359	0.141	1.05211	0.520482	2.12761	24	5527	13	2451	0.887631	0.969429	not_significant	0.0220622	0.0517676	2.7226	1.528	3.917	0.609	4.469	0	-0.0466	-0.053	-0.04	0.003	-14.087	0	0.8182	0.634	1.002	0.094	8.712	0	0.808	0.589	1.027	0.112	7.228	0	-0.5205	-1.687	0.646	0.595	-0.874	0.382	0.0669
Altered mental status	mental disorders	-0.0302	-0.846	0.786	0.416	-0.073	0.970251	0.429128	2.1946	18	5533	10	2454	0.942174	0.982389	not_significant	-0.0131157	0.0258687	2.7223	1.528	3.916	0.609	4.468	0	-0.0466	-0.053	-0.04	0.003	-14.08	0	0.8183	0.634	1.002	0.094	8.712	0	0.808	0.589	1.027	0.112	7.228	0	-0.5202	-1.687	0.647	0.595	-0.874	0.382	0.0671
Althete's foot	infectious diseases	-0.1498	-0.546	0.247	0.202	-0.741	0.86088	0.579262	1.28018	66	5485	47	2417	0.458842	0.808436	not_significant	-0.0650573	0.338336	2.7172	1.523	3.911	0.609	4.46	0	-0.0464	-0.053	-0.04	0.003	-14.014	0	0.8161	0.632	1	0.094	8.688	0	0.8068	0.588	1.026	0.112	7.217	0	-0.5178	-1.684	0.649	0.595	-0.87	0.384	0.0701
Amblyopia	sense organs	0.8152	-0.739	2.37	0.793	1.028	2.25963	0.477591	10.6974	11	5540	10	2454	0.304086	0.712311	not_significant	0.354037	0.517003	2.7233	1.529	3.917	0.609	4.47	0	-0.0466	-0.053	-0.04	0.003	-14.089	0	0.8175	0.633	1.002	0.094	8.704	0	0.8063	0.587	1.025	0.112	7.213	0	-0.5205	-1.687	0.646	0.595	-0.874	0.382	0.0658
Amyloidosis	endocrine/metabolic	1.1496	-1.021	3.32	1.107	1.038	3.15693	0.360235	27.6604	10	5541	10	2454	0.299194	0.70499	not_significant	0.499265	0.524048	2.7245	1.53	3.919	0.609	4.471	0	-0.0466	-0.053	-0.04	0.003	-14.097	0	0.8182	0.634	1.002	0.094	8.712	0	0.8057	0.587	1.025	0.112	7.207	0	-0.52	-1.687	0.647	0.595	-0.873	0.382	0.0659
Amyotrophic Lateral Sclerosis	neurological	-0.8236	-3.601	1.953	1.417	-0.581	0.438849	0.0272964	7.04981	10	5541	10	2454	0.561036	0.857259	not_significant	-0.357685	0.251009	2.7236	1.529	3.918	0.609	4.47	0	-0.0466	-0.053	-0.04	0.003	-14.092	0	0.8184	0.634	1.002	0.094	8.714	0	0.808	0.589	1.027	0.112	7.229	0	-0.5204	-1.687	0.646	0.595	-0.874	0.382	0.0669
Anal and rectal conditions	digestive	-0.2374	-0.596	0.121	0.183	-1.297	0.788676	0.551011	1.12862	87	5464	57	2407	0.194618	0.569005	not_significant	-0.103102	0.710817	2.7213	1.527	3.915	0.609	4.468	0	-0.0465	-0.053	-0.04	0.003	-14.062	0	0.8144	0.63	0.999	0.094	8.667	0	0.8014	0.582	1.021	0.112	7.162	0	-0.514	-1.681	0.653	0.595	-0.864	0.388	0.0729
Anal and rectal polyp	digestive	-0.3622	-1.198	0.474	0.427	-0.849	0.696143	0.301797	1.60641	12	5539	12	2452	0.395775	0.782118	not_significant	-0.157301	0.402552	2.7173	1.523	3.911	0.609	4.46	0	-0.0465	-0.053	-0.04	0.003	-14.04	0	0.8192	0.635	1.003	0.094	8.723	0	0.809	0.59	1.028	0.112	7.237	0	-0.5197	-1.686	0.647	0.595	-0.873	0.383	0.0673
Anaphylactic shock NOS	injuries & poisonings	0.4164	-1.022	1.855	0.734	0.567	1.51649	0.359874	6.3917	10	5541	10	2454	0.570432	0.857259	not_significant	0.18084	0.243796	2.7224	1.528	3.917	0.609	4.468	0	-0.0466	-0.053	-0.04	0.003	-14.088	0	0.819	0.635	1.003	0.094	8.721	0	0.809	0.59	1.028	0.112	7.236	0	-0.5208	-1.688	0.646	0.595	-0.875	0.382	0.0666
Anemia in chronic kidney disease	hematopoietic	0.5292	-0.524	1.583	0.538	0.985	1.69757	0.592147	4.86954	16	5535	10	2454	0.324851	0.732817	not_significant	0.229829	0.488316	2.723	1.529	3.917	0.609	4.469	0	-0.0466	-0.053	-0.04	0.003	-14.093	0	0.8195	0.635	1.004	0.094	8.725	0	0.8103	0.591	1.029	0.112	7.248	0	-0.522	-1.689	0.645	0.595	-0.877	0.381	0.065
Anemia in neoplastic disease	hematopoietic	1.975	0.506	3.444	0.749	2.635	7.20662	1.65864	31.312	27	5524	10	2454	0.00840849	0.0864859	not_significant	0.857732	2.07528	2.7149	1.52	3.91	0.61	4.453	0	-0.0465	-0.053	-0.04	0.003	-14.041	0	0.8311	0.646	1.016	0.094	8.823	0	0.8281	0.608	1.048	0.112	7.39	0	-0.5353	-1.703	0.632	0.596	-0.898	0.369	0.0579
Anemia of chronic disease	hematopoietic	0.3881	-0.647	1.424	0.528	0.735	1.47418	0.523614	4.1537	15	5536	10	2454	0.462639	0.808436	not_significant	0.16855	0.334758	2.7239	1.53	3.918	0.609	4.47	0	-0.0466	-0.053	-0.04	0.003	-14.099	0	0.8197	0.636	1.004	0.094	8.725	0	0.8102	0.591	1.029	0.112	7.246	0	-0.5218	-1.689	0.645	0.595	-0.876	0.381	0.0652
Aneurysm of iliac artery	circulatory system	0.9896	-1.423	3.402	1.231	0.804	2.69016	0.24099	30.0241	10	5541	10	2454	0.421398	0.794801	not_significant	0.429778	0.375308	2.7276	1.533	3.922	0.609	4.476	0	-0.0467	-0.053	-0.04	0.003	-14.107	0	0.818	0.634	1.002	0.094	8.709	0	0.8081	0.589	1.027	0.112	7.229	0	-0.5206	-1.688	0.646	0.595	-0.874	0.382	0.0669
Angina pectoris	circulatory system	-0.5275	-1.674	0.619	0.585	-0.902	0.590078	0.187496	1.85707	10	5541	10	2454	0.367315	0.757355	not_significant	-0.22909	0.434962	2.7128	1.519	3.907	0.609	4.453	0	-0.0463	-0.053	-0.04	0.003	-13.966	0	0.8175	0.633	1.002	0.094	8.703	0	0.8064	0.587	1.026	0.112	7.213	0	-0.5177	-1.684	0.649	0.595	-0.87	0.384	0.0679
Ankylosing spondylitis	musculoskeletal	-0.9625	-2.251	0.326	0.658	-1.464	0.381937	0.105294	1.38542	10	5541	10	2454	0.143272	0.487206	not_significant	-0.418008	0.843839	2.7245	1.53	3.919	0.609	4.472	0	-0.0466	-0.053	-0.04	0.003	-14.094	0	0.8171	0.633	1.001	0.094	8.698	0	0.8068	0.588	1.026	0.112	7.217	0	-0.5201	-1.687	0.647	0.595	-0.874	0.382	0.0715
Ankylosis of joint	musculoskeletal	-1.6449	-2.851	-0.439	0.615	-2.673	0.193032	0.0577865	0.644681	10	5541	11	2453	0.00752783	0.079517	not_significant	-0.714371	2.12333	2.7167	1.523	3.911	0.609	4.46	0	-0.0464	-0.053	-0.04	0.003	-14.036	0	0.8172	0.633	1.001	0.094	8.702	0	0.8082	0.589	1.027	0.112	7.228	0	-0.5192	-1.686	0.647	0.595	-0.872	0.383	0.0719
Anomalies of jaw size/symmetry	digestive	-1.3224	-2.428	-0.216	0.564	-2.344	0.266495	0.0882131	0.805735	10	5541	10	2454	0.0190977	0.14793	not_significant	-0.574311	1.71902	2.7224	1.528	3.916	0.609	4.469	0	-0.0465	-0.053	-0.04	0.003	-14.071	0	0.8156	0.631	1	0.094	8.681	0	0.8045	0.585	1.024	0.112	7.196	0	-0.5185	-1.685	0.648	0.595	-0.871	0.384	0.0749
Anomalies of tooth position/malocclusion	digestive	-0.1532	-1.68	1.374	0.779	-0.197	0.857958	0.186374	3.95112	10	5541	10	2454	0.844093	0.957029	not_significant	-0.0665339	0.0736098	2.7223	1.528	3.916	0.609	4.468	0	-0.0466	-0.053	-0.04	0.003	-14.085	0	0.8183	0.634	1.002	0.094	8.713	0	0.808	0.589	1.027	0.112	7.229	0	-0.5203	-1.687	0.647	0.595	-0.874	0.382	0.0672
Anomalous atrioventricular excitation	circulatory system	-0.314	-1.667	1.039	0.69	-0.455	0.730519	0.188813	2.82639	10	5541	10	2454	0.649142	0.882735	not_significant	-0.136368	0.18766	2.7228	1.529	3.917	0.609	4.469	0	-0.0466	-0.053	-0.04	0.003	-14.086	0	0.8176	0.634	1.002	0.094	8.705	0	0.807	0.588	1.026	0.112	7.219	0	-0.5196	-1.686	0.647	0.595	-0.873	0.383	0.0675
Anorexia	endocrine/metabolic	0.3008	-0.593	1.195	0.456	0.659	1.35094	0.552667	3.30356	19	5532	10	2454	0.50963	0.841417	not_significant	0.130636	0.292745	2.7098	1.513	3.906	0.61	4.44	0	-0.0465	-0.053	-0.04	0.003	-14.067	0	0.8177	0.634	1.002	0.094	8.706	0	0.8082	0.589	1.027	0.112	7.23	0	-0.5098	-1.679	0.659	0.596	-0.855	0.393	0.0783
Anorexia nervosa	mental disorders	-0.558	-3.34	2.224	1.419	-0.393	0.572353	0.035437	9.24423	10	5541	10	2454	0.694236	0.904819	not_significant	-0.242336	0.158493	2.7229	1.529	3.917	0.609	4.469	0	-0.0466	-0.053	-0.04	0.003	-14.089	0	0.8183	0.634	1.002	0.094	8.714	0	0.808	0.589	1.027	0.112	7.229	0	-0.5203	-1.687	0.646	0.595	-0.874	0.382	0.0669
Anterior pituitary disorders		2.4659	1	3.932	0.748	3.296	11.7741	2.71828	51.0089	33	5518	10	2454	0.000979571	0.0162854	mi_significant	1.07093	3.00896	2.755	1.56	3.95	0.61	4.518	0	-0.0473	-0.054	-0.041	0.003	-14.24	0	0.8137	0.629	0.998	0.094	8.657	0	0.809	0.59	1.028	0.112	7.231	0	-0.5264	-1.694	0.641	0.596	-0.884	0.377	0.0646
Antineoplastic and immunosuppressive drugs causing adverse effects	injuries & poisonings	1.5996	0.553	2.646	0.534	2.997	4.95105	1.73846	14.0975	42	5509	10	2454	0.00272788	0.0366884	mi_significant	0.694697	2.56418	2.7104	1.516	3.905	0.61	4.446	0	-0.0464	-0.053	-0.04	0.003	-13.987	0	0.8284	0.644	1.013	0.094	8.797	0	0.8268	0.607	1.046	0.112	7.378	0	-0.5348	-1.702	0.633	0.596	-0.898	0.369	0.0576
Anxiety disorder	mental disorders	-1.283	-1.461	-1.105	0.091	-14.097	0.277204	0.232004	0.331211	234	5317	383	2081	3.97326e-45	2.378e-42	con_significant	-0.5572	44.4009	2.8566	1.634	4.08	0.624	4.578	0	-0.0464	-0.053	-0.04	0.003	-13.823	0	0.7553	0.568	0.942	0.095	7.922	0	0.7204	0.498	0.942	0.113	6.361	0	-0.5191	-1.714	0.676	0.61	-0.852	0.394	0.0772
Anxiety disorders	mental disorders	0.1072	-2.164	2.378	1.159	0.093	1.11316	0.114865	10.7833	10	5541	10	2454	0.926269	0.979416	not_significant	0.0465564	0.0332627	2.7224	1.528	3.917	0.609	4.468	0	-0.0466	-0.053	-0.04	0.003	-14.082	0	0.8181	0.634	1.002	0.094	8.712	0	0.808	0.589	1.027	0.112	7.228	0	-0.5203	-1.687	0.647	0.595	-0.874	0.382	0.067
Aortic aneurysm	circulatory system	-0.2677	-1.171	0.636	0.461	-0.581	0.765137	0.310057	1.88891	11	5540	10	2454	0.561428	0.857259	not_significant	-0.116261	0.250706	2.7189	1.525	3.913	0.609	4.463	0	-0.0465	-0.053	-0.04	0.003	-14.046	0	0.8184	0.634	1.002	0.094	8.714	0	0.8083	0.589	1.027	0.112	7.231	0	-0.5198	-1.686	0.647	0.595	-0.873	0.383	0.0677
Aortic ectasia	circulatory system	-0.8083	-2.003	0.386	0.609	-1.326	0.445615	0.13493	1.47108	10	5541	10	2454	0.184792	0.555768	not_significant	-0.35104	0.733317	2.7139	1.52	3.908	0.609	4.455	0	-0.0464	-0.053	-0.04	0.003	-14.012	0	0.819	0.635	1.003	0.094	8.722	0	0.809	0.59	1.028	0.112	7.238	0	-0.5196	-1.686	0.647	0.595	-0.873	0.383	0.0682
Aphasia	mental disorders	0.118	-1.208	1.444	0.676	0.174	1.12524	0.298794	4.23761	10	5541	10	2454	0.861556	0.961153	not_significant	0.0512467	0.0647165	2.7234	1.529	3.918	0.609	4.47	0	-0.0466	-0.053	-0.04	0.003	-14.084	0	0.8182	0.634	1.002	0.094	8.712	0	0.8081	0.589	1.027	0.112	7.229	0	-0.5205	-1.687	0.646	0.595	-0.874	0.382	0.0667
Aphasia/speech disturbance	mental disorders	-0.0414	-1.068	0.985	0.524	-0.079	0.959445	0.343695	2.67781	10	5541	10	2454	0.93693	0.97948	not_significant	-0.0179798	0.0282929	2.7222	1.528	3.916	0.609	4.468	0	-0.0466	-0.053	-0.04	0.003	-14.077	0	0.8182	0.634	1.002	0.094	8.713	0	0.808	0.589	1.027	0.112	7.229	0	-0.5203	-1.687	0.647	0.595	-0.874	0.382	0.0671
Aplastic anemia	hematopoietic	-0.1971	-2.089	1.695	0.965	-0.204	0.821109	0.123811	5.44665	10	5541	10	2454	0.838232	0.956423	not_significant	-0.0855994	0.0766358	2.7221	1.528	3.916	0.609	4.468	0	-0.0466	-0.053	-0.04	0.003	-14.082	0	0.8184	0.634	1.002	0.094	8.714	0	0.808	0.589	1.027	0.112	7.228	0	-0.5202	-1.687	0.647	0.595	-0.874	0.382	0.0671
Apnea	respiratory	-0.4479	-1.658	0.762	0.618	-0.725	0.638969	0.19052	2.14256	10	5541	10	2454	0.468288	0.811415	not_significant	-0.19452	0.329487	2.7227	1.529	3.917	0.609	4.469	0	-0.0466	-0.053	-0.04	0.003	-14.081	0	0.8168	0.633	1.001	0.094	8.696	0	0.8065	0.587	1.026	0.112	7.214	0	-0.5189	-1.686	0.648	0.595	-0.872	0.383	0.0691
Appendiceal conditions	digestive	-0.2978	-2.17	1.574	0.955	-0.312	0.74245	0.114178	4.82591	10	5541	10	2454	0.755248	0.924806	not_significant	-0.129333	0.121911	2.7224	1.528	3.917	0.609	4.468	0	-0.0466	-0.053	-0.04	0.003	-14.086	0	0.8184	0.634	1.002	0.094	8.714	0	0.808	0.589	1.027	0.112	7.229	0	-0.5203	-1.687	0.647	0.595	-0.874	0.382	0.0671
Appendicitis	digestive	-0.1895	-1.342	0.962	0.588	-0.322	0.827373	0.261323	2.61693	10	5541	10	2454	0.747086	0.921057	not_significant	-0.0822988	0.12663	2.7305	1.536	3.925	0.609	4.481	0	-0.0466	-0.053	-0.04	0.003	-14.086	0	0.8187	0.635	1.003	0.094	8.716	0	0.8081	0.589	1.027	0.112	7.229	0	-0.5284	-1.695	0.639	0.595	-0.888	0.375	0.0589
Arrhythmia (cardiac) NOS	circulatory system	-0.1468	-0.646	0.352	0.255	-0.576	0.863467	0.524138	1.42191	46	5505	28	2436	0.564457	0.857259	not_significant	-0.0637544	0.248369	2.72	1.526	3.914	0.609	4.464	0	-0.0465	-0.053	-0.04	0.003	-14.069	0	0.8196	0.635	1.004	0.094	8.725	0	0.8087	0.59	1.028	0.112	7.234	0	-0.5197	-1.687	0.647	0.595	-0.873	0.383	0.0675
Arterial dissection	circulatory system	0.5042	-1.305	2.313	0.923	0.546	1.65566	0.271173	10.1047	10	5541	10	2454	0.584809	0.863152	not_significant	0.218971	0.232986	2.7257	1.531	3.92	0.609	4.473	0	-0.0467	-0.053	-0.04	0.003	-14.096	0	0.818	0.634	1.002	0.094	8.709	0	0.808	0.589	1.027	0.112	7.228	0	-0.5205	-1.687	0.646	0.595	-0.874	0.382	0.067
Arterial embolism and thrombosis of lower extremity artery	circulatory system	0.9321	-1.478	3.342	1.229	0.758	2.53984	0.228093	28.2756	10	5541	10	2454	0.448366	0.807899	not_significant	0.404806	0.348367	2.7254	1.531	3.92	0.609	4.473	0	-0.0467	-0.053	-0.04	0.003	-14.104	0	0.819	0.635	1.003	0.094	8.72	0	0.8093	0.59	1.028	0.112	7.238	0	-0.5213	-1.688	0.646	0.595	-0.876	0.381	0.0659
Arteritis NOS	circulatory system	-0.4036	-1.762	0.955	0.693	-0.582	0.667911	0.171701	2.59867	10	5541	10	2454	0.560339	0.857259	not_significant	-0.175281	0.251549	2.7217	1.527	3.916	0.609	4.467	0	-0.0466	-0.053	-0.04	0.003	-14.081	0	0.8187	0.635	1.003	0.094	8.718	0	0.8086	0.589	1.028	0.112	7.233	0	-0.52	-1.687	0.647	0.595	-0.873	0.382	0.0671
Arthralgia/ankylosis of temporomandibular joint	digestive	-0.9007	-1.889	0.087	0.504	-1.787	0.406285	0.151223	1.0909	10	5541	10	2454	0.073972	0.344455	not_significant	-0.391169	1.13093	2.725	1.531	3.919	0.609	4.472	0	-0.0466	-0.053	-0.04	0.003	-14.1	0	0.8179	0.634	1.002	0.094	8.71	0	0.8084	0.589	1.027	0.112	7.231	0	-0.52	-1.687	0.647	0.595	-0.873	0.382	0.0697
Arthropathy associated with neurological disorders	musculoskeletal	-0.1483	-3.743	3.447	1.834	-0.081	0.862172	0.0236829	31.406	10	5541	10	2454	0.935553	0.97948	not_significant	-0.0644059	0.0289318	2.7224	1.528	3.917	0.609	4.468	0	-0.0466	-0.053	-0.04	0.003	-14.081	0	0.818	0.634	1.002	0.094	8.707	0	0.8078	0.589	1.027	0.112	7.226	0	-0.5203	-1.687	0.647	0.595	-0.874	0.382	0.0672
Arthropathy NOS	musculoskeletal	-0.6984	-1.237	-0.16	0.275	-2.543	0.49738	0.290254	0.852144	27	5524	34	2430	0.0109819	0.0995854	not_significant	-0.303311	1.95932	2.7042	1.51	3.898	0.609	4.44	0	-0.0461	-0.053	-0.04	0.003	-13.929	0	0.8187	0.635	1.003	0.094	8.716	0	0.8059	0.587	1.025	0.112	7.209	0	-0.5162	-1.683	0.65	0.595	-0.867	0.386	0.0721
Articular cartilage disorder	musculoskeletal	-1.1037	-1.884	-0.324	0.398	-2.773	0.331642	0.151981	0.72325	12	5539	16	2448	0.00554614	0.0645229	not_significant	-0.479331	2.25601	2.7247	1.53	3.919	0.609	4.472	0	-0.0466	-0.053	-0.04	0.003	-14.097	0	0.8184	0.634	1.003	0.094	8.712	0	0.806	0.587	1.025	0.112	7.208	0	-0.5151	-1.682	0.652	0.595	-0.865	0.387	0.0712
Ascites (non malignant)	digestive	0.1974	-0.643	1.038	0.429	0.46	1.21823	0.525713	2.82356	21	5530	10	2454	0.645299	0.882735	not_significant	0.0857297	0.190239	2.7206	1.526	3.915	0.609	4.465	0	-0.0465	-0.053	-0.04	0.003	-14.07	0	0.8189	0.635	1.003	0.094	8.718	0	0.8097	0.59	1.029	0.112	7.24	0	-0.5217	-1.688	0.645	0.595	-0.876	0.381	0.0664
Aseptic necrosis of bone	musculoskeletal	-0.2878	-1.344	0.769	0.539	-0.534	0.749912	0.2608	2.15761	10	5541	10	2454	0.593355	0.866154	not_significant	-0.12499	0.226685	2.7242	1.53	3.918	0.609	4.471	0	-0.0466	-0.053	-0.04	0.003	-14.094	0	0.8175	0.633	1.002	0.094	8.704	0	0.8062	0.587	1.025	0.112	7.209	0	-0.5187	-1.686	0.648	0.595	-0.871	0.384	0.0673
Asphyxia and hypoxemia		-0.145	-0.766	0.476	0.317	-0.457	0.865022	0.464869	1.60962	27	5524	19	2445	0.647369	0.882735	not_significant	-0.0629727	0.188848	2.7219	1.528	3.916	0.609	4.468	0	-0.0466	-0.053	-0.04	0.003	-14.076	0	0.8173	0.633	1.001	0.094	8.702	0	0.8062	0.587	1.025	0.112	7.209	0	-0.519	-1.686	0.648	0.595	-0.872	0.383	0.0679
Asthma	respiratory	-0.5678	-0.787	-0.349	0.112	-5.084	0.566771	0.455208	0.705393	201	5350	178	2286	3.68778e-07	1.91925e-05	con_significant	-0.246592	6.43323	2.7364	1.534	3.939	0.613	4.461	0	-0.0457	-0.052	-0.039	0.003	-13.77	0	0.8099	0.626	0.994	0.094	8.614	0	0.7914	0.572	1.011	0.112	7.072	0	-0.5389	-1.714	0.636	0.6	-0.899	0.369	0.0523
Asthma with exacerbation	respiratory	-0.6242	-0.993	-0.255	0.188	-3.318	0.53569	0.370464	0.774916	66	5485	62	2402	0.000908198	0.0153115	con_significant	-0.271087	3.04182	2.7191	1.526	3.913	0.609	4.465	0	-0.0464	-0.053	-0.04	0.003	-14.019	0	0.8088	0.625	0.993	0.094	8.605	0	0.79	0.571	1.009	0.112	7.057	0	-0.5041	-1.67	0.662	0.595	-0.847	0.397	0.0829
Astigmatism	sense organs	-0.7083	-1.024	-0.393	0.161	-4.4	0.492481	0.359155	0.675029	96	5455	80	2384	1.0843e-05	0.000418679	con_significant	-0.307611	4.96485	2.7883	1.58	3.996	0.616	4.523	0	-0.0467	-0.053	-0.04	0.003	-14.101	0	0.8206	0.636	1.005	0.094	8.733	0	0.8199	0.6	1.039	0.112	7.324	0	-0.5667	-1.747	0.614	0.602	-0.941	0.347	0.022
Atherosclerosis	circulatory system	-0.8605	-3.709	1.988	1.453	-0.592	0.422951	0.024502	7.30092	10	5541	10	2454	0.553756	0.857259	not_significant	-0.37371	0.256682	2.7218	1.528	3.916	0.609	4.467	0	-0.0466	-0.053	-0.04	0.003	-14.081	0	0.8183	0.634	1.002	0.094	8.713	0	0.808	0.589	1.027	0.112	7.228	0	-0.5202	-1.687	0.647	0.595	-0.874	0.382	0.0678
Atherosclerosis of aorta	circulatory system	-0.3563	-1.938	1.226	0.807	-0.441	0.700263	0.143992	3.40757	10	5541	10	2454	0.65895	0.885326	not_significant	-0.154739	0.181147	2.7197	1.526	3.914	0.609	4.464	0	-0.0465	-0.053	-0.04	0.003	-14.051	0	0.8184	0.634	1.002	0.094	8.714	0	0.8079	0.589	1.027	0.112	7.228	0	-0.5201	-1.687	0.647	0.595	-0.874	0.382	0.0674
Atherosclerosis of native arteries of the extremities with intermittent claudication	circulatory system	-1.2633	-3.168	0.641	0.972	-1.3	0.28272	0.0420877	1.89838	10	5541	10	2454	0.193529	0.569005	not_significant	-0.548644	0.713254	2.7214	1.527	3.916	0.609	4.467	0	-0.0466	-0.053	-0.04	0.003	-14.077	0	0.8187	0.635	1.003	0.094	8.718	0	0.8097	0.591	1.029	0.112	7.243	0	-0.5201	-1.687	0.647	0.595	-0.874	0.382	0.0677
Atherosclerosis of native arteries of the extremities with ulceration or gangrene	circulatory system	-0.4414	-3.215	2.332	1.415	-0.312	0.643135	0.0401553	10.2985	10	5541	10	2454	0.755071	0.924806	not_significant	-0.191698	0.122012	2.7226	1.528	3.917	0.609	4.469	0	-0.0466	-0.053	-0.04	0.003	-14.087	0	0.8183	0.634	1.002	0.094	8.713	0	0.808	0.589	1.027	0.112	7.229	0	-0.5203	-1.687	0.647	0.595	-0.874	0.382	0.067
Atherosclerosis of the extremities	circulatory system	-0.2783	-3.056	2.499	1.417	-0.196	0.75707	0.0470756	12.1703	10	5541	10	2454	0.844297	0.957029	not_significant	-0.120864	0.073505	2.7224	1.528	3.917	0.609	4.468	0	-0.0466	-0.053	-0.04	0.003	-14.085	0	0.8182	0.634	1.002	0.094	8.713	0	0.808	0.589	1.027	0.112	7.229	0	-0.5203	-1.687	0.647	0.595	-0.874	0.382	0.067
Atopic/contact dermatitis due to other or unspecified	dermatologic	-0.3439	-0.535	-0.153	0.098	-3.525	0.709	0.585669	0.85813	320	5231	213	2251	0.000423666	0.00859539	con_significant	-0.149354	3.37298	2.7079	1.515	3.901	0.609	4.448	0	-0.0461	-0.053	-0.04	0.003	-13.925	0	0.8074	0.623	0.992	0.094	8.591	0	0.795	0.576	1.014	0.112	7.106	0	-0.5	-1.666	0.666	0.595	-0.841	0.401	0.1026
Atrial fibrillation	circulatory system	-0.3692	-0.858	0.119	0.249	-1.481	0.691287	0.424009	1.12637	39	5512	38	2426	0.138494	0.481911	not_significant	-0.160342	0.858569	2.7035	1.51	3.897	0.609	4.438	0	-0.0461	-0.053	-0.04	0.003	-13.863	0	0.8162	0.632	1	0.094	8.689	0	0.8039	0.585	1.023	0.112	7.19	0	-0.5155	-1.682	0.651	0.595	-0.866	0.386	0.0736
Atrial flutter	circulatory system	0.0156	-0.832	0.863	0.433	0.036	1.01572	0.435178	2.37026	14	5537	12	2452	0.971195	0.994393	not_significant	0.00677499	0.0126938	2.723	1.529	3.917	0.609	4.468	0	-0.0466	-0.053	-0.04	0.003	-14.047	0	0.8182	0.634	1.002	0.094	8.712	0	0.808	0.589	1.027	0.112	7.228	0	-0.5204	-1.687	0.646	0.595	-0.874	0.382	0.067
Atrioventricular [AV] block	circulatory system	-1.1873	-3.11	0.736	0.981	-1.21	0.305044	0.044601	2.08757	10	5541	10	2454	0.226254	0.611064	not_significant	-0.515638	0.645404	2.7219	1.528	3.916	0.609	4.467	0	-0.0466	-0.053	-0.04	0.003	-14.084	0	0.8191	0.635	1.003	0.094	8.722	0	0.8083	0.589	1.027	0.112	7.231	0	-0.5203	-1.687	0.647	0.595	-0.874	0.382	0.0673
Atrioventricular block, complete	circulatory system	-1.6941	-4.023	0.635	1.188	-1.426	0.183765	0.0178992	1.88702	10	5541	10	2454	0.153985	0.508562	not_significant	-0.735738	0.812522	2.7194	1.525	3.914	0.609	4.463	0	-0.0465	-0.053	-0.04	0.003	-14.064	0	0.8187	0.635	1.003	0.094	8.718	0	0.808	0.589	1.027	0.112	7.229	0	-0.5201	-1.687	0.647	0.595	-0.874	0.382	0.0686
Atrophic gastritis	digestive	-0.0282	-0.611	0.555	0.298	-0.095	0.972194	0.542808	1.74194	39	5512	19	2445	0.924623	0.979416	not_significant	-0.0122471	0.0340352	2.7239	1.53	3.918	0.609	4.47	0	-0.0466	-0.053	-0.04	0.003	-14.08	0	0.8181	0.634	1.002	0.094	8.711	0	0.8078	0.589	1.027	0.112	7.225	0	-0.5217	-1.689	0.645	0.595	-0.876	0.381	0.0657
Attention deficit hyperactivity disorder	mental disorders	-0.4295	-0.848	-0.011	0.213	-2.014	0.650834	0.428271	0.98906	54	5497	43	2421	0.0440476	0.266806	not_significant	-0.186529	1.35608	2.7232	1.529	3.918	0.609	4.469	0	-0.0466	-0.053	-0.04	0.003	-14.097	0	0.8206	0.637	1.005	0.094	8.737	0	0.8116	0.592	1.031	0.112	7.259	0	-0.518	-1.685	0.649	0.595	-0.87	0.384	0.0687
Autoimmune disease NEC	endocrine/metabolic	-0.4254	-2.42	1.57	1.018	-0.418	0.653508	0.0889216	4.80665	10	5541	10	2454	0.67602	0.898109	not_significant	-0.184749	0.17004	2.7228	1.529	3.917	0.609	4.469	0	-0.0466	-0.053	-0.04	0.003	-14.087	0	0.8178	0.634	1.002	0.094	8.708	0	0.8074	0.588	1.026	0.112	7.222	0	-0.5199	-1.687	0.647	0.595	-0.873	0.383	0.0672
Autoimmune hemolytic anemias	hematopoietic	-1.6633	-4.369	1.042	1.38	-1.205	0.189513	0.0126639	2.83488	10	5541	10	2454	0.228212	0.613865	not_significant	-0.722362	0.641661	2.723	1.529	3.917	0.609	4.469	0	-0.0466	-0.053	-0.04	0.003	-14.095	0	0.8195	0.635	1.004	0.094	8.726	0	0.808	0.589	1.027	0.112	7.228	0	-0.5195	-1.686	0.647	0.595	-0.873	0.383	0.0663
Back pain	symptoms	-0.4418	-0.606	-0.278	0.084	-5.287	0.642878	0.545529	0.757297	426	5125	307	2157	1.24254e-07	6.76054e-06	con_significant	-0.191871	6.90569	2.7788	1.588	3.97	0.608	4.574	0	-0.0458	-0.052	-0.039	0.003	-13.812	0	0.8001	0.616	0.984	0.094	8.506	0	0.7857	0.566	1.005	0.112	7.014	0	-0.5536	-1.717	0.609	0.593	-0.933	0.351	0.0428
Bacteremia	infectious diseases	0.1226	-0.769	1.014	0.455	0.269	1.13043	0.463476	2.75661	15	5536	10	2454	0.787574	0.93897	not_significant	0.0532445	0.103709	2.723	1.529	3.917	0.609	4.469	0	-0.0466	-0.053	-0.04	0.003	-14.089	0	0.819	0.635	1.003	0.094	8.716	0	0.8091	0.59	1.028	0.112	7.233	0	-0.5211	-1.688	0.646	0.595	-0.875	0.381	0.0665
Bacterial enteritis	infectious diseases	0.3321	-0.58	1.244	0.465	0.714	1.39389	0.559898	3.46946	20	5531	10	2454	0.475261	0.816195	not_significant	0.144229	0.323067	2.7074	1.511	3.904	0.61	4.436	0	-0.0466	-0.053	-0.04	0.003	-14.097	0	0.8187	0.635	1.003	0.094	8.718	0	0.81	0.591	1.029	0.112	7.245	0	-0.505	-1.674	0.664	0.596	-0.847	0.397	0.0827
Bacterial infection NOS	infectious diseases	0.6365	-0.005	1.278	0.327	1.946	1.88985	0.995012	3.58945	40	5511	14	2450	0.0516956	0.296075	not_significant	0.276428	1.28655	2.7344	1.54	3.929	0.61	4.486	0	-0.0469	-0.053	-0.04	0.003	-14.157	0	0.8213	0.637	1.005	0.094	8.742	0	0.8169	0.598	1.036	0.112	7.3	0	-0.5286	-1.696	0.639	0.596	-0.887	0.375	0.0616
Bacterial pneumonia	respiratory	1.0943	-0.07	2.258	0.594	1.842	2.98709	0.932394	9.56394	14	5537	10	2454	0.0654155	0.320911	not_significant	0.475248	1.18432	2.7318	1.537	3.927	0.61	4.482	0	-0.0468	-0.053	-0.04	0.003	-14.139	0	0.8211	0.637	1.005	0.094	8.738	0	0.812	0.593	1.031	0.112	7.26	0	-0.5229	-1.69	0.644	0.596	-0.878	0.38	0.0645
Balanoposthitis	genitourinary	0.6933	-0.091	1.477	0.4	1.733	2.00031	0.913018	4.37979	32	5519	10	2454	0.0831388	0.368582	not_significant	0.301096	1.0802	2.7242	1.53	3.919	0.609	4.47	0	-0.0467	-0.053	-0.04	0.003	-14.116	0	0.8235	0.639	1.008	0.094	8.761	0	0.8137	0.594	1.033	0.112	7.274	0	-0.5253	-1.693	0.642	0.596	-0.882	0.378	0.0613
Barrett's esophagus	digestive	0.116	-0.849	1.081	0.493	0.236	1.123	0.427843	2.94763	13	5538	10	2454	0.813787	0.944796	not_significant	0.0503782	0.0894892	2.7246	1.53	3.919	0.609	4.471	0	-0.0466	-0.053	-0.04	0.003	-14.076	0	0.818	0.634	1.002	0.094	8.709	0	0.808	0.589	1.027	0.112	7.229	0	-0.5205	-1.687	0.646	0.595	-0.874	0.382	0.0667
Basal cell carcinoma	neoplasms	-0.4931	-1.167	0.181	0.344	-1.435	0.61073	0.311299	1.19842	16	5535	21	2443	0.151418	0.504867	not_significant	-0.214151	0.819823	2.7109	1.517	3.905	0.609	4.45	0	-0.0463	-0.053	-0.04	0.003	-13.987	0	0.8204	0.636	1.004	0.094	8.736	0	0.8093	0.59	1.028	0.112	7.241	0	-0.5192	-1.686	0.647	0.595	-0.872	0.383	0.0664
Benign neoplasm of adrenal gland	neoplasms	0.1364	-2.162	2.435	1.173	0.116	1.14614	0.115095	11.4158	10	5541	10	2454	0.907442	0.977685	not_significant	0.0592378	0.042181	2.7229	1.529	3.917	0.609	4.469	0	-0.0466	-0.053	-0.04	0.003	-14.086	0	0.8182	0.634	1.002	0.094	8.712	0	0.8078	0.589	1.027	0.112	7.226	0	-0.5203	-1.687	0.646	0.595	-0.874	0.382	0.0669
Benign neoplasm of bone and articular cartilage	neoplasms	0.8553	-0.835	2.546	0.862	0.992	2.35208	0.433874	12.756	10	5541	10	2454	0.321384	0.732817	not_significant	0.371452	0.492976	2.7228	1.529	3.917	0.609	4.469	0	-0.0466	-0.053	-0.04	0.003	-14.092	0	0.8191	0.635	1.003	0.094	8.723	0	0.8089	0.59	1.028	0.112	7.237	0	-0.5206	-1.687	0.646	0.595	-0.874	0.382	0.0655
Benign neoplasm of brain, cranial nerves, meninges	neoplasms	0.1803	-0.949	1.31	0.576	0.313	1.19758	0.387128	3.70617	11	5540	10	2454	0.754446	0.924806	not_significant	0.0783033	0.122372	2.7234	1.529	3.918	0.609	4.47	0	-0.0466	-0.053	-0.04	0.003	-14.089	0	0.8185	0.634	1.003	0.094	8.714	0	0.8085	0.589	1.028	0.112	7.232	0	-0.5206	-1.687	0.646	0.595	-0.874	0.382	0.0662
Benign neoplasm of colon	neoplasms	-0.2215	-0.541	0.098	0.163	-1.361	0.801316	0.582166	1.10296	89	5462	89	2375	0.173643	0.538864	not_significant	-0.0961962	0.760343	2.6875	1.493	3.881	0.609	4.411	0	-0.0457	-0.052	-0.039	0.003	-13.57	0	0.8144	0.63	0.999	0.094	8.667	0	0.8027	0.583	1.022	0.112	7.176	0	-0.5132	-1.679	0.652	0.595	-0.863	0.388	0.0753
Benign neoplasm of eye	neoplasms	-1.2294	-4.2	1.741	1.516	-0.811	0.292468	0.0149956	5.70304	10	5541	10	2454	0.417302	0.794801	not_significant	-0.533922	0.37955	2.7236	1.529	3.918	0.609	4.47	0	-0.0466	-0.053	-0.04	0.003	-14.09	0	0.8175	0.633	1.002	0.094	8.705	0	0.81	0.591	1.029	0.112	7.243	0	-0.5211	-1.688	0.646	0.595	-0.875	0.381	0.0681
Benign neoplasm of eye, uveal	neoplasms	-0.4279	-1.975	1.119	0.789	-0.542	0.651877	0.138761	3.06179	10	5541	10	2454	0.587622	0.865136	not_significant	-0.185835	0.230902	2.7221	1.528	3.916	0.609	4.468	0	-0.0466	-0.053	-0.04	0.003	-14.084	0	0.8185	0.634	1.003	0.094	8.715	0	0.808	0.589	1.027	0.112	7.229	0	-0.5203	-1.687	0.647	0.595	-0.874	0.382	0.0676
Benign neoplasm of kidney and other urinary organs	neoplasms	-1.2682	-3.682	1.145	1.231	-1.03	0.281338	0.0251726	3.14244	10	5541	10	2454	0.303103	0.712311	not_significant	-0.550772	0.518409	2.7238	1.53	3.918	0.609	4.47	0	-0.0466	-0.053	-0.04	0.003	-14.095	0	0.8187	0.635	1.003	0.094	8.718	0	0.8081	0.589	1.027	0.112	7.23	0	-0.5204	-1.687	0.646	0.595	-0.874	0.382	0.0667
Benign neoplasm of lip, oral cavity, and pharynx	neoplasms	1.2618	-0.916	3.439	1.111	1.136	3.53177	0.400116	31.1558	10	5541	10	2454	0.256081	0.650863	not_significant	0.547993	0.591622	2.7269	1.533	3.921	0.609	4.475	0	-0.0467	-0.053	-0.04	0.003	-14.109	0	0.8177	0.634	1.002	0.094	8.706	0	0.8072	0.588	1.026	0.112	7.221	0	-0.5207	-1.688	0.646	0.595	-0.875	0.382	0.0662
Benign neoplasm of other parts of digestive system	neoplasms	-0.5462	-1.463	0.371	0.468	-1.167	0.579146	0.231541	1.44918	10	5541	11	2453	0.24303	0.635167	not_significant	-0.237212	0.614341	2.715	1.521	3.909	0.609	4.457	0	-0.0464	-0.053	-0.04	0.003	-14.008	0	0.8162	0.632	1	0.094	8.689	0	0.8046	0.585	1.024	0.112	7.196	0	-0.5175	-1.684	0.649	0.595	-0.87	0.385	0.0705
Benign neoplasm of pituitary gland and craniopharyngeal duct (pouch)	neoplasms	1.0506	0.099	2.002	0.485	2.164	2.85937	1.10407	7.40385	27	5524	10	2454	0.0304615	0.20145	not_significant	0.45627	1.51625	2.7252	1.53	3.92	0.61	4.471	0	-0.0467	-0.053	-0.04	0.003	-14.137	0	0.8254	0.641	1.01	0.094	8.776	0	0.8176	0.598	1.037	0.112	7.306	0	-0.5265	-1.694	0.641	0.596	-0.884	0.377	0.0602
Benign neoplasm of respiratory and intrathoracic organs	neoplasms	0.2609	-1.167	1.689	0.728	0.358	1.2981	0.311299	5.41406	10	5541	10	2454	0.720242	0.91038	not_significant	0.113307	0.142522	2.7021	1.505	3.899	0.611	4.424	0	-0.0466	-0.053	-0.04	0.003	-14.088	0	0.8188	0.635	1.003	0.094	8.717	0	0.8085	0.589	1.028	0.112	7.232	0	-0.4999	-1.67	0.67	0.597	-0.838	0.402	0.0871
Benign neoplasm of skin	neoplasms	-0.6829	-0.855	-0.511	0.088	-7.789	0.50515	0.425283	0.599895	314	5237	318	2146	6.78037e-15	1.35268e-12	con_significant	-0.29658	14.1687	2.7767	1.587	3.967	0.607	4.573	0	-0.0464	-0.053	-0.04	0.003	-13.979	0	0.8281	0.644	1.013	0.094	8.798	0	0.8125	0.593	1.032	0.112	7.256	0	-0.5598	-1.722	0.603	0.593	-0.944	0.345	0.0283
Benign neoplasm of thyroid glands	neoplasms	-0.651	-3.467	2.165	1.437	-0.453	0.521524	0.0312105	8.7146	10	5541	10	2454	0.650436	0.882735	not_significant	-0.282726	0.186795	2.7213	1.527	3.915	0.609	4.467	0	-0.0466	-0.053	-0.04	0.003	-14.076	0	0.8182	0.634	1.002	0.094	8.713	0	0.8079	0.589	1.027	0.112	7.228	0	-0.5202	-1.687	0.647	0.595	-0.874	0.382	0.0677
Benign neoplasm of unspecified sites	neoplasms	-0.3629	-1.14	0.414	0.396	-0.916	0.695656	0.319819	1.51286	14	5537	15	2449	0.359822	0.753195	not_significant	-0.157605	0.443913	2.7165	1.522	3.911	0.609	4.459	0	-0.0464	-0.053	-0.04	0.003	-14.02	0	0.8182	0.634	1.002	0.094	8.714	0	0.8082	0.589	1.027	0.112	7.231	0	-0.5191	-1.686	0.648	0.595	-0.872	0.383	0.0678
Bipolar	mental disorders	-0.3747	-1.034	0.285	0.336	-1.114	0.687495	0.355582	1.32976	22	5529	17	2447	0.265387	0.657044	not_significant	-0.16273	0.57612	2.7242	1.53	3.918	0.609	4.471	0	-0.0466	-0.053	-0.04	0.003	-14.093	0	0.8165	0.632	1.001	0.094	8.694	0	0.8068	0.588	1.026	0.112	7.218	0	-0.519	-1.686	0.648	0.595	-0.872	0.383	0.0693
Bladder neck obstruction	genitourinary	-0.0063	-1.318	1.306	0.669	-0.009	0.99372	0.26767	3.69138	10	5541	10	2454	0.992541	0.997741	not_significant	-0.00273606	0.00325171	2.7225	1.528	3.917	0.609	4.468	0	-0.0466	-0.053	-0.04	0.003	-14.057	0	0.8182	0.634	1.002	0.094	8.711	0	0.808	0.589	1.027	0.112	7.227	0	-0.5203	-1.687	0.647	0.595	-0.874	0.382	0.0671
Blindness and low vision	sense organs	0.601	-0.238	1.44	0.428	1.404	1.82394	0.788203	4.2207	25	5526	10	2454	0.160354	0.514067	not_significant	0.261011	0.79492	2.7251	1.531	3.92	0.609	4.472	0	-0.0467	-0.053	-0.04	0.003	-14.112	0	0.8213	0.637	1.006	0.094	8.74	0	0.8122	0.593	1.031	0.112	7.261	0	-0.5235	-1.691	0.644	0.595	-0.879	0.379	0.0631
Blister	injuries & poisonings	0.5144	-1.77	2.799	1.166	0.441	1.67263	0.170333	16.4282	10	5541	10	2454	0.659002	0.885326	not_significant	0.223401	0.181113	2.7209	1.527	3.915	0.609	4.465	0	-0.0466	-0.053	-0.04	0.003	-14.077	0	0.8197	0.636	1.004	0.094	8.722	0	0.8094	0.59	1.029	0.112	7.238	0	-0.5209	-1.688	0.646	0.595	-0.875	0.382	0.0658
Blood in stool	digestive	-0.0374	-0.53	0.455	0.251	-0.149	0.963291	0.588605	1.57617	49	5502	27	2437	0.881625	0.969059	not_significant	-0.0162426	0.0547161	2.7222	1.528	3.916	0.609	4.468	0	-0.0466	-0.053	-0.04	0.003	-14.08	0	0.818	0.634	1.002	0.094	8.71	0	0.8076	0.588	1.027	0.112	7.224	0	-0.5198	-1.687	0.647	0.595	-0.873	0.383	0.0674
Bone cancer	neoplasms	2.0283	-0.041	4.098	1.056	1.921	7.60115	0.959829	60.2197	15	5536	10	2454	0.0547673	0.305961	not_significant	0.880879	1.26148	2.7149	1.521	3.909	0.609	4.456	0	-0.0464	-0.053	-0.04	0.003	-14.022	0	0.8201	0.636	1.004	0.094	8.727	0	0.8126	0.593	1.032	0.112	7.265	0	-0.5237	-1.69	0.643	0.595	-0.88	0.379	0.0659
Bone marrow or stem cell transplant	neoplasms	1.7696	0.262	3.277	0.769	2.301	5.86851	1.29953	26.4962	23	5528	10	2454	0.0214088	0.15917	not_significant	0.768528	1.66941	2.7075	1.513	3.902	0.609	4.442	0	-0.0463	-0.053	-0.04	0.003	-13.984	0	0.8275	0.643	1.012	0.094	8.792	0	0.8183	0.599	1.038	0.112	7.313	0	-0.5252	-1.692	0.642	0.595	-0.882	0.378	0.061
Broken tooth	injuries & poisonings	-0.1065	-2.713	2.5	1.33	-0.08	0.898975	0.0663375	12.1825	10	5541	10	2454	0.936174	0.97948	not_significant	-0.0462524	0.0286437	2.7225	1.528	3.917	0.609	4.468	0	-0.0466	-0.053	-0.04	0.003	-14.084	0	0.818	0.634	1.002	0.094	8.709	0	0.8079	0.589	1.027	0.112	7.227	0	-0.5202	-1.687	0.647	0.595	-0.874	0.382	0.0672
Bronchiectasis	respiratory	1.5246	0.283	2.767	0.634	2.406	4.59331	1.32711	15.9108	22	5529	10	2454	0.0161254	0.131307	not_significant	0.662125	1.79249	2.7271	1.533	3.922	0.609	4.475	0	-0.0467	-0.053	-0.04	0.003	-14.105	0	0.8188	0.635	1.003	0.094	8.715	0	0.8114	0.592	1.031	0.112	7.255	0	-0.5232	-1.69	0.644	0.595	-0.879	0.38	0.065
Bronchitis	respiratory	-0.4641	-0.947	0.019	0.247	-1.882	0.628701	0.387903	1.01918	38	5513	37	2427	0.0599039	0.311257	not_significant	-0.201556	1.22254	2.745	1.544	3.946	0.613	4.479	0	-0.0462	-0.053	-0.04	0.003	-13.923	0	0.817	0.633	1.001	0.094	8.7	0	0.805	0.586	1.024	0.112	7.2	0	-0.5545	-1.729	0.62	0.599	-0.925	0.355	0.033
Bronchopneumonia and lung abscess	respiratory	-2.1797	-4.34	-0.02	1.102	-1.978	0.113075	0.0130365	0.980199	10	5541	10	2454	0.0479381	0.282669	not_significant	-0.946632	1.31932	2.723	1.529	3.917	0.609	4.469	0	-0.0466	-0.053	-0.04	0.003	-14.091	0	0.8201	0.636	1.004	0.094	8.732	0	0.8086	0.589	1.028	0.112	7.234	0	-0.5204	-1.687	0.647	0.595	-0.874	0.382	0.066
Bundle branch block	circulatory system	-1.1877	-2.663	0.287	0.753	-1.578	0.304922	0.0697387	1.33242	10	5541	10	2454	0.114523	0.43854	not_significant	-0.515812	0.941108	2.7167	1.523	3.911	0.609	4.46	0	-0.0464	-0.053	-0.04	0.003	-14.024	0	0.8164	0.632	1.001	0.094	8.691	0	0.8048	0.586	1.024	0.112	7.198	0	-0.5178	-1.684	0.649	0.595	-0.87	0.384	0.0703
Burns		0.3299	-0.659	1.319	0.505	0.654	1.39083	0.517368	3.73968	17	5534	10	2454	0.513208	0.843833	not_significant	0.143274	0.289706	2.7242	1.53	3.918	0.609	4.471	0	-0.0466	-0.053	-0.04	0.003	-14.095	0	0.8174	0.633	1.002	0.094	8.703	0	0.8076	0.588	1.027	0.112	7.224	0	-0.5214	-1.688	0.645	0.595	-0.876	0.381	0.0667
Bursitis	musculoskeletal	-0.4442	-0.92	0.031	0.243	-1.831	0.641337	0.398519	1.03149	39	5512	38	2426	0.0671069	0.32521	not_significant	-0.192914	1.17323	2.7096	1.516	3.903	0.609	4.449	0	-0.0463	-0.053	-0.04	0.003	-13.965	0	0.8164	0.632	1	0.094	8.693	0	0.8056	0.587	1.025	0.112	7.207	0	-0.5155	-1.682	0.651	0.595	-0.866	0.386	0.0712
Bursitis disorders	musculoskeletal	0.0752	-1.371	1.521	0.738	0.102	1.0781	0.253853	4.5768	10	5541	10	2454	0.918856	0.979416	not_significant	0.0326589	0.0367525	2.7227	1.529	3.917	0.609	4.469	0	-0.0466	-0.053	-0.04	0.003	-14.087	0	0.8181	0.634	1.002	0.094	8.711	0	0.808	0.589	1.027	0.112	7.228	0	-0.5203	-1.687	0.646	0.595	-0.874	0.382	0.067
Cachexia	endocrine/metabolic	-0.1983	-2.447	2.051	1.147	-0.173	0.820124	0.0865529	7.77567	10	5541	10	2454	0.862759	0.961567	not_significant	-0.0861206	0.0641103	2.7227	1.529	3.917	0.609	4.469	0	-0.0466	-0.053	-0.04	0.003	-14.086	0	0.8177	0.634	1.002	0.094	8.704	0	0.8076	0.588	1.027	0.112	7.223	0	-0.5201	-1.687	0.647	0.595	-0.874	0.382	0.0673
Calcaneal spur; Exostosis NOS	musculoskeletal	-0.26	-1.123	0.603	0.44	-0.59	0.771052	0.325302	1.82759	14	5537	10	2454	0.55501	0.857259	not_significant	-0.112917	0.255699	2.7202	1.526	3.914	0.609	4.465	0	-0.0465	-0.053	-0.04	0.003	-14.067	0	0.8189	0.635	1.003	0.094	8.719	0	0.8086	0.59	1.028	0.112	7.234	0	-0.52	-1.687	0.647	0.595	-0.873	0.382	0.0675
Calculus of bile duct	digestive	-0.7447	-2.018	0.529	0.65	-1.146	0.474877	0.132921	1.69723	10	5541	10	2454	0.251748	0.647282	not_significant	-0.323419	0.599034	2.7227	1.529	3.917	0.609	4.469	0	-0.0466	-0.053	-0.04	0.003	-14.08	0	0.8157	0.632	1	0.094	8.683	0	0.8046	0.585	1.024	0.112	7.195	0	-0.5181	-1.685	0.649	0.595	-0.87	0.384	0.0705
Calculus of kidney	genitourinary	-0.0686	-0.444	0.307	0.191	-0.358	0.9337	0.641465	1.35934	82	5469	51	2413	0.720007	0.91038	not_significant	-0.0297926	0.142664	2.7192	1.525	3.913	0.609	4.463	0	-0.0465	-0.053	-0.04	0.003	-14.022	0	0.8177	0.634	1.002	0.094	8.707	0	0.8073	0.588	1.026	0.112	7.221	0	-0.5188	-1.686	0.648	0.595	-0.872	0.383	0.0686
Calculus of lower urinary tract	genitourinary	0.0782	-1.519	1.676	0.815	0.096	1.08134	0.218931	5.34414	10	5541	10	2454	0.923527	0.979416	not_significant	0.0339618	0.0345503	2.723	1.529	3.917	0.609	4.469	0	-0.0466	-0.053	-0.04	0.003	-14.085	0	0.818	0.634	1.002	0.094	8.71	0	0.808	0.589	1.027	0.112	7.229	0	-0.5204	-1.687	0.646	0.595	-0.874	0.382	0.067
Calculus of ureter	genitourinary	-0.6428	-1.366	0.08	0.369	-1.742	0.525818	0.255125	1.08329	17	5534	16	2448	0.0815194	0.365726	not_significant	-0.279164	1.08874	2.7167	1.522	3.911	0.609	4.459	0	-0.0465	-0.053	-0.04	0.003	-14.044	0	0.8206	0.636	1.005	0.094	8.736	0	0.8099	0.591	1.029	0.112	7.245	0	-0.5192	-1.686	0.648	0.595	-0.872	0.383	0.0696
Cancer of bladder	neoplasms	-0.9208	-2.389	0.548	0.749	-1.229	0.3982	0.0917214	1.72979	10	5541	10	2454	0.219042	0.606929	not_significant	-0.399898	0.659473	2.7191	1.525	3.913	0.609	4.463	0	-0.0465	-0.053	-0.04	0.003	-14.048	0	0.8192	0.635	1.003	0.094	8.723	0	0.8082	0.589	1.027	0.112	7.231	0	-0.5201	-1.687	0.647	0.595	-0.874	0.382	0.0667
Cancer of brain	neoplasms	-0.1294	-1.303	1.044	0.599	-0.216	0.878622	0.271715	2.84056	10	5541	10	2454	0.828947	0.951342	not_significant	-0.0561977	0.0814734	2.7225	1.528	3.917	0.609	4.468	0	-0.0466	-0.053	-0.04	0.003	-14.083	0	0.8177	0.634	1.002	0.094	8.704	0	0.8075	0.588	1.027	0.112	7.222	0	-0.5201	-1.687	0.647	0.595	-0.874	0.382	0.0677
Cancer of bronchus; lung	neoplasms	0.193	-1.281	1.667	0.752	0.257	1.21288	0.277759	5.29626	10	5541	10	2454	0.797391	0.941132	not_significant	0.0838188	0.0983289	2.7163	1.52	3.912	0.61	4.451	0	-0.0466	-0.053	-0.04	0.003	-14.088	0	0.8178	0.634	1.002	0.094	8.708	0	0.808	0.589	1.027	0.112	7.228	0	-0.5131	-1.682	0.656	0.596	-0.86	0.39	0.0742
Cancer of connective tissue	neoplasms	0.5559	-0.625	1.737	0.602	0.923	1.74351	0.535261	5.68028	14	5537	10	2454	0.356217	0.753195	not_significant	0.241424	0.448285	2.722	1.528	3.916	0.609	4.467	0	-0.0466	-0.053	-0.04	0.003	-14.08	0	0.819	0.635	1.003	0.094	8.719	0	0.8097	0.591	1.029	0.112	7.241	0	-0.5215	-1.688	0.645	0.595	-0.876	0.381	0.0656
Cancer of eye	neoplasms	-1.3849	-4.033	1.263	1.351	-1.025	0.250349	0.0177211	3.53601	10	5541	10	2454	0.305249	0.713639	not_significant	-0.601454	0.515345	2.721	1.527	3.915	0.609	4.466	0	-0.0465	-0.053	-0.04	0.003	-14.067	0	0.8166	0.633	1.001	0.094	8.694	0	0.8059	0.587	1.025	0.112	7.208	0	-0.5188	-1.685	0.648	0.595	-0.872	0.383	0.069
Cancer of nasopharynx	neoplasms	-1.6193	-4.24	1.001	1.337	-1.211	0.198037	0.0144076	2.721	10	5541	10	2454	0.225812	0.611064	not_significant	-0.703253	0.646252	2.7219	1.528	3.916	0.609	4.467	0	-0.0466	-0.053	-0.04	0.003	-14.083	0	0.8186	0.635	1.003	0.094	8.716	0	0.808	0.589	1.027	0.112	7.229	0	-0.5203	-1.687	0.647	0.595	-0.874	0.382	0.0681
Cancer of oropharynx	neoplasms	0.5385	-2.274	3.351	1.435	0.375	1.71343	0.1029	28.5313	10	5541	10	2454	0.707497	0.91038	not_significant	0.233868	0.150275	2.725	1.531	3.919	0.609	4.472	0	-0.0466	-0.053	-0.04	0.003	-14.089	0	0.8181	0.634	1.002	0.094	8.711	0	0.808	0.589	1.027	0.112	7.229	0	-0.5205	-1.687	0.646	0.595	-0.874	0.382	0.0669
Cancer of prostate	neoplasms	1.772	0.739	2.805	0.527	3.362	5.88261	2.09384	16.5271	17	5534	10	2454	0.000774854	0.0132915	mi_significant	0.76957	3.11078	2.811	1.613	4.009	0.611	4.6	0	-0.0487	-0.055	-0.042	0.003	-14.476	0	0.8198	0.635	1.004	0.094	8.717	0	0.8137	0.594	1.033	0.112	7.271	0	-0.5317	-1.701	0.638	0.597	-0.891	0.373	0.059
Cancer of stomach	neoplasms	-0.5728	-2.57	1.424	1.019	-0.562	0.563944	0.0765355	4.1537	10	5541	10	2454	0.573959	0.857259	not_significant	-0.248764	0.241119	2.7239	1.53	3.918	0.609	4.471	0	-0.0466	-0.053	-0.04	0.003	-14.091	0	0.817	0.633	1.001	0.094	8.697	0	0.8064	0.587	1.026	0.112	7.212	0	-0.5193	-1.686	0.648	0.595	-0.872	0.383	0.0676
Cancer of tongue	neoplasms	0.214	-2.301	2.729	1.283	0.167	1.23862	0.100159	15.3176	10	5541	10	2454	0.8675	0.963263	not_significant	0.092939	0.0617307	2.723	1.529	3.917	0.609	4.469	0	-0.0466	-0.053	-0.04	0.003	-14.087	0	0.8181	0.634	1.002	0.094	8.712	0	0.808	0.589	1.027	0.112	7.228	0	-0.5203	-1.687	0.646	0.595	-0.874	0.382	0.0669
Cancer, suspected or other	neoplasms	1.1215	0.022	2.221	0.561	1.999	3.06945	1.02224	9.21654	23	5528	10	2454	0.0455823	0.27281	not_significant	0.487061	1.3412	2.6956	1.495	3.896	0.612	4.401	0	-0.0467	-0.053	-0.04	0.003	-14.098	0	0.8189	0.635	1.003	0.094	8.714	0	0.8134	0.594	1.033	0.112	7.271	0	-0.4952	-1.668	0.678	0.599	-0.827	0.408	0.0949
Candidiasis	infectious diseases	1.0211	0.257	1.785	0.39	2.619	2.77625	1.29305	5.95958	37	5514	10	2454	0.00881314	0.0873549	not_significant	0.443458	2.05487	2.7341	1.539	3.929	0.61	4.484	0	-0.0469	-0.053	-0.04	0.003	-14.169	0	0.8249	0.641	1.009	0.094	8.77	0	0.8158	0.596	1.035	0.112	7.289	0	-0.5273	-1.695	0.64	0.596	-0.885	0.376	0.0597
Carbuncle and furuncle	dermatologic	0.2984	-0.66	1.257	0.489	0.61	1.3477	0.516851	3.51486	17	5534	10	2454	0.541672	0.857259	not_significant	0.129593	0.266264	2.7126	1.516	3.909	0.61	4.444	0	-0.0466	-0.053	-0.04	0.003	-14.094	0	0.8182	0.634	1.002	0.094	8.712	0	0.8083	0.589	1.027	0.112	7.23	0	-0.5094	-1.678	0.66	0.596	-0.854	0.393	0.0773
Carcinoma in situ of skin	neoplasms	0.9173	-1.506	3.34	1.236	0.742	2.50252	0.221795	28.2191	10	5541	10	2454	0.458063	0.808436	not_significant	0.398378	0.339075	2.7267	1.532	3.921	0.609	4.475	0	-0.0467	-0.053	-0.04	0.003	-14.104	0	0.818	0.634	1.002	0.094	8.709	0	0.808	0.589	1.027	0.112	7.228	0	-0.5206	-1.687	0.646	0.595	-0.874	0.382	0.0669
Cardiac and circulatory congenital anomalies	congenital anomalies	-0.7804	-2.298	0.737	0.774	-1.008	0.458223	0.10046	2.08966	10	5541	10	2454	0.313562	0.724583	not_significant	-0.338923	0.503676	2.7202	1.526	3.914	0.609	4.465	0	-0.0465	-0.053	-0.04	0.003	-14.067	0	0.8176	0.634	1.002	0.094	8.706	0	0.8068	0.588	1.026	0.112	7.218	0	-0.5194	-1.686	0.647	0.595	-0.872	0.383	0.0683
Cardiac conduction disorders	circulatory system	-0.351	-1.301	0.599	0.485	-0.724	0.703984	0.272259	1.8203	11	5540	10	2454	0.468823	0.811415	not_significant	-0.152437	0.328991	2.718	1.524	3.912	0.609	4.461	0	-0.0465	-0.053	-0.04	0.003	-14.032	0	0.8178	0.634	1.002	0.094	8.707	0	0.8065	0.587	1.026	0.112	7.214	0	-0.5187	-1.685	0.648	0.595	-0.871	0.383	0.0686
Cardiac congenital anomalies	congenital anomalies	-1.4722	-2.81	-0.135	0.683	-2.157	0.22942	0.060205	0.873716	10	5541	10	2454	0.031	0.20277	not_significant	-0.639368	1.50864	2.7119	1.518	3.906	0.609	4.451	0	-0.0464	-0.053	-0.04	0.003	-14.016	0	0.8217	0.638	1.006	0.094	8.747	0	0.8075	0.588	1.027	0.112	7.225	0	-0.5175	-1.684	0.649	0.595	-0.869	0.385	0.0703
Cardiac shunt/ heart septal defect	congenital anomalies	-1.3584	-2.696	-0.021	0.682	-1.99	0.257072	0.0674749	0.979219	10	5541	10	2454	0.0465602	0.277276	not_significant	-0.589946	1.33199	2.718	1.524	3.912	0.609	4.461	0	-0.0465	-0.053	-0.04	0.003	-14.064	0	0.8217	0.638	1.006	0.094	8.746	0	0.8078	0.589	1.027	0.112	7.227	0	-0.5181	-1.685	0.649	0.595	-0.87	0.384	0.0686
Cardiogenic shock	symptoms	-0.9283	-2.915	1.058	1.013	-0.916	0.395225	0.054204	2.8806	10	5541	10	2454	0.359709	0.753195	not_significant	-0.403156	0.444049	2.7257	1.531	3.92	0.609	4.473	0	-0.0467	-0.053	-0.04	0.003	-14.103	0	0.8178	0.634	1.002	0.094	8.708	0	0.807	0.588	1.026	0.112	7.22	0	-0.5197	-1.687	0.647	0.595	-0.873	0.383	0.0671
Cardiomegaly	circulatory system	-0.1675	-0.713	0.378	0.278	-0.602	0.845777	0.490171	1.45936	36	5515	26	2438	0.547296	0.857259	not_significant	-0.0727443	0.261777	2.7168	1.523	3.911	0.609	4.459	0	-0.0464	-0.053	-0.04	0.003	-14.012	0	0.8184	0.634	1.002	0.094	8.715	0	0.8068	0.588	1.026	0.112	7.217	0	-0.5186	-1.685	0.648	0.595	-0.871	0.384	0.0685
Cataract	sense organs	0.2356	-0.591	1.062	0.422	0.558	1.26567	0.553773	2.89215	17	5534	11	2453	0.576519	0.857259	not_significant	0.10232	0.239186	2.7317	1.537	3.927	0.61	4.481	0	-0.0468	-0.053	-0.04	0.003	-14.061	0	0.8173	0.633	1.001	0.094	8.701	0	0.8083	0.589	1.027	0.112	7.231	0	-0.5219	-1.689	0.645	0.595	-0.877	0.381	0.066
Celiac disease	digestive	-0.3322	-1.301	0.637	0.494	-0.672	0.717344	0.272259	1.8908	10	5541	10	2454	0.50168	0.837055	not_significant	-0.144273	0.299573	2.7195	1.525	3.914	0.609	4.463	0	-0.0465	-0.053	-0.04	0.003	-14.065	0	0.8198	0.636	1.004	0.094	8.726	0	0.8082	0.589	1.027	0.112	7.231	0	-0.5191	-1.686	0.648	0.595	-0.872	0.383	0.0665
Cellulitis and abscess of arm/hand	dermatologic	0.3053	-0.632	1.243	0.478	0.638	1.35703	0.531528	3.466	14	5537	10	2454	0.523388	0.85704	not_significant	0.13259	0.281176	2.7234	1.529	3.918	0.609	4.469	0	-0.0466	-0.053	-0.04	0.003	-14.094	0	0.8202	0.636	1.004	0.094	8.727	0	0.8097	0.591	1.029	0.112	7.241	0	-0.5219	-1.689	0.645	0.595	-0.877	0.381	0.0657
Cellulitis and abscess of face/neck	dermatologic	-0.4117	-1.259	0.435	0.432	-0.952	0.662523	0.283938	1.54496	13	5538	11	2453	0.340852	0.740472	not_significant	-0.178799	0.467434	2.7232	1.529	3.917	0.609	4.47	0	-0.0466	-0.053	-0.04	0.003	-14.079	0	0.8148	0.631	0.999	0.094	8.671	0	0.8061	0.587	1.025	0.112	7.209	0	-0.5185	-1.685	0.648	0.595	-0.871	0.384	0.0699
Cellulitis and abscess of fingers/toes	dermatologic	-0.4623	-1.011	0.086	0.28	-1.653	0.629833	0.363855	1.08981	28	5523	29	2435	0.0983634	0.400479	not_significant	-0.200774	1.00717	2.7132	1.519	3.907	0.609	4.454	0	-0.0463	-0.053	-0.04	0.003	-13.997	0	0.8173	0.633	1.001	0.094	8.704	0	0.8036	0.584	1.023	0.112	7.188	0	-0.5152	-1.682	0.651	0.595	-0.866	0.387	0.0695
Cellulitis and abscess of foot, toe	dermatologic	0.659	-1.165	2.483	0.931	0.708	1.93286	0.311923	11.9771	10	5541	10	2454	0.47888	0.818026	not_significant	0.2862	0.319773	2.7252	1.531	3.92	0.609	4.472	0	-0.0467	-0.053	-0.04	0.003	-14.101	0	0.819	0.635	1.003	0.094	8.721	0	0.8087	0.59	1.028	0.112	7.235	0	-0.5206	-1.688	0.646	0.595	-0.874	0.382	0.0661
Cellulitis and abscess of leg, except foot	dermatologic	0.013	-0.723	0.749	0.376	0.035	1.01308	0.485294	2.11488	21	5530	12	2452	0.972318	0.994393	not_significant	0.00564583	0.0121917	2.7226	1.528	3.917	0.609	4.469	0	-0.0466	-0.053	-0.04	0.003	-14.086	0	0.8182	0.634	1.002	0.094	8.711	0	0.808	0.589	1.027	0.112	7.228	0	-0.5204	-1.687	0.646	0.595	-0.874	0.382	0.067
Cellulitis and abscess of oral soft tissues	digestive	-0.4837	-2.15	1.182	0.85	-0.569	0.616498	0.116484	3.26089	10	5541	10	2454	0.569311	0.857259	not_significant	-0.210068	0.24465	2.7233	1.529	3.917	0.609	4.47	0	-0.0466	-0.053	-0.04	0.003	-14.089	0	0.8176	0.633	1.002	0.094	8.704	0	0.808	0.589	1.027	0.112	7.228	0	-0.5202	-1.687	0.647	0.595	-0.874	0.382	0.0673
Cellulitis and abscess of trunk	dermatologic	-0.9843	-1.74	-0.228	0.386	-2.551	0.373701	0.17552	0.796124	12	5539	18	2446	0.0107379	0.0981168	not_significant	-0.427476	1.96908	2.7153	1.521	3.909	0.609	4.456	0	-0.0464	-0.053	-0.04	0.003	-14.041	0	0.8211	0.637	1.005	0.094	8.741	0	0.8048	0.586	1.024	0.112	7.199	0	-0.5152	-1.682	0.652	0.595	-0.865	0.387	0.0685
Central/nonobstroctive sleep apnea	neurological	1.2114	-0.152	2.575	0.696	1.742	3.35818	0.858988	13.1313	10	5541	10	2454	0.0815779	0.365726	not_significant	0.526104	1.08843	2.7376	1.543	3.932	0.61	4.491	0	-0.0469	-0.053	-0.04	0.003	-14.162	0	0.818	0.634	1.002	0.094	8.706	0	0.8091	0.59	1.028	0.112	7.236	0	-0.5219	-1.689	0.645	0.596	-0.876	0.381	0.0663
Cerebral aneurysm	circulatory system	-1.4193	-3.147	0.309	0.882	-1.61	0.241883	0.0429809	1.36206	10	5541	10	2454	0.107425	0.424381	not_significant	-0.616394	0.968895	2.7194	1.525	3.914	0.609	4.463	0	-0.0465	-0.053	-0.04	0.003	-14.063	0	0.8189	0.635	1.003	0.094	8.72	0	0.808	0.589	1.027	0.112	7.229	0	-0.5201	-1.687	0.647	0.595	-0.874	0.382	0.0696
Cerebral artery occlusion, with cerebral infarction	circulatory system	-0.4359	-1.277	0.405	0.429	-1.016	0.646682	0.278873	1.4993	12	5539	12	2452	0.309851	0.72149	not_significant	-0.189309	0.508847	2.7193	1.525	3.913	0.609	4.464	0	-0.0465	-0.053	-0.04	0.003	-14.056	0	0.8177	0.634	1.002	0.094	8.708	0	0.806	0.587	1.025	0.112	7.21	0	-0.5185	-1.685	0.648	0.595	-0.871	0.384	0.0681
Cerebral cysts	neurological	1.3259	-0.88	3.532	1.126	1.178	3.76557	0.414783	34.1923	10	5541	10	2454	0.238768	0.626767	not_significant	0.575831	0.622023	2.7217	1.527	3.916	0.609	4.466	0	-0.0466	-0.053	-0.04	0.003	-14.088	0	0.8218	0.638	1.006	0.094	8.745	0	0.8114	0.592	1.031	0.112	7.256	0	-0.5218	-1.689	0.645	0.595	-0.876	0.381	0.0642
Cerebral edema and compression of brain	neurological	0.3969	-0.776	1.569	0.598	0.663	1.48721	0.460243	4.80184	11	5540	10	2454	0.507057	0.839157	not_significant	0.172371	0.294943	2.7223	1.528	3.916	0.609	4.468	0	-0.0466	-0.053	-0.04	0.003	-14.083	0	0.8186	0.635	1.003	0.094	8.716	0	0.809	0.59	1.028	0.112	7.236	0	-0.521	-1.688	0.646	0.595	-0.875	0.381	0.0664
Certain early complications of trauma or procedure	injuries & poisonings	-0.5081	-2.08	1.064	0.802	-0.633	0.601638	0.12493	2.89794	10	5541	10	2454	0.526477	0.857259	not_significant	-0.220665	0.278621	2.72	1.526	3.914	0.609	4.464	0	-0.0465	-0.053	-0.04	0.003	-14.066	0	0.8188	0.635	1.003	0.094	8.718	0	0.8078	0.589	1.027	0.112	7.227	0	-0.5197	-1.687	0.647	0.595	-0.873	0.383	0.068
Cervical radiculitis	symptoms	-0.4179	-0.852	0.016	0.221	-1.888	0.658428	0.426561	1.01613	51	5500	41	2423	0.0589856	0.311257	not_significant	-0.181492	1.22925	2.7356	1.542	3.929	0.609	4.493	0	-0.0464	-0.053	-0.04	0.003	-14.008	0	0.8226	0.638	1.007	0.094	8.757	0	0.8082	0.589	1.027	0.112	7.231	0	-0.5416	-1.707	0.624	0.595	-0.91	0.363	0.0449
Cervicalgia	symptoms	-0.4038	-0.653	-0.155	0.127	-3.175	0.667778	0.520482	0.856415	177	5374	123	2341	0.00149691	0.022681	con_significant	-0.175368	2.8248	2.7335	1.54	3.927	0.609	4.489	0	-0.0462	-0.053	-0.04	0.003	-13.964	0	0.8183	0.634	1.002	0.094	8.712	0	0.8036	0.585	1.023	0.112	7.189	0	-0.533	-1.699	0.633	0.595	-0.896	0.37	0.0614
Cervicocranial/Cervicobrachial syndrome		0.5887	-1.862	3.039	1.25	0.471	1.80164	0.155362	20.8843	10	5541	10	2454	0.637745	0.882735	not_significant	0.255669	0.195353	2.724	1.53	3.918	0.609	4.471	0	-0.0466	-0.053	-0.04	0.003	-14.093	0	0.818	0.634	1.002	0.094	8.71	0	0.8076	0.588	1.027	0.112	7.224	0	-0.5204	-1.687	0.646	0.595	-0.874	0.382	0.0668
Changes in skin texture	dermatologic	-0.2312	-1.73	1.268	0.765	-0.302	0.793581	0.177284	3.55374	10	5541	10	2454	0.76242	0.927456	not_significant	-0.100409	0.117806	2.7224	1.528	3.917	0.609	4.468	0	-0.0466	-0.053	-0.04	0.003	-14.086	0	0.8186	0.635	1.003	0.094	8.716	0	0.808	0.589	1.027	0.112	7.228	0	-0.5201	-1.687	0.647	0.595	-0.874	0.382	0.0669
Cholangitis	digestive	0.3421	-1.461	2.145	0.92	0.372	1.4079	0.232004	8.54204	10	5541	10	2454	0.709975	0.91038	not_significant	0.148572	0.148757	2.7233	1.529	3.918	0.609	4.47	0	-0.0466	-0.053	-0.04	0.003	-14.09	0	0.8186	0.634	1.003	0.094	8.715	0	0.8085	0.589	1.028	0.112	7.232	0	-0.5206	-1.687	0.646	0.595	-0.874	0.382	0.0665
Cholecystitis without cholelithiasis	digestive	-0.7767	-1.836	0.283	0.54	-1.437	0.459921	0.159454	1.32711	10	5541	10	2454	0.150701	0.50388	not_significant	-0.337317	0.821884	2.7264	1.532	3.92	0.609	4.475	0	-0.0466	-0.053	-0.04	0.003	-14.099	0	0.8144	0.63	0.999	0.094	8.667	0	0.8034	0.584	1.023	0.112	7.184	0	-0.5167	-1.683	0.65	0.595	-0.868	0.385	0.0695
Cholelithiasis	digestive	0.13	-0.526	0.786	0.335	0.388	1.13883	0.590964	2.1946	31	5520	14	2450	0.69783	0.905968	not_significant	0.0564583	0.15625	2.7225	1.528	3.917	0.609	4.468	0	-0.0466	-0.053	-0.04	0.003	-14.087	0	0.8189	0.635	1.003	0.094	8.718	0	0.8091	0.59	1.028	0.112	7.236	0	-0.5214	-1.688	0.646	0.595	-0.876	0.381	0.0659
Cholelithiasis with acute cholecystitis	digestive	-0.0778	-1.561	1.406	0.757	-0.103	0.925149	0.209926	4.0796	10	5541	10	2454	0.918189	0.979416	not_significant	-0.0337881	0.037068	2.7226	1.528	3.917	0.609	4.469	0	-0.0466	-0.053	-0.04	0.003	-14.085	0	0.818	0.634	1.002	0.094	8.709	0	0.8078	0.589	1.027	0.112	7.227	0	-0.5201	-1.687	0.647	0.595	-0.874	0.382	0.0672
Cholelithiasis with other cholecystitis	digestive	0.325	-0.756	1.406	0.552	0.589	1.38403	0.469541	4.0796	12	5539	10	2454	0.555809	0.857259	not_significant	0.141146	0.255075	2.7229	1.529	3.917	0.609	4.469	0	-0.0466	-0.053	-0.04	0.003	-14.09	0	0.8192	0.635	1.003	0.094	8.721	0	0.8093	0.59	1.028	0.112	7.238	0	-0.521	-1.688	0.646	0.595	-0.875	0.381	0.0657
Cholesteatoma	sense organs	-0.5817	-1.774	0.61	0.608	-0.956	0.558947	0.169653	1.84043	10	5541	10	2454	0.338824	0.740472	not_significant	-0.252629	0.470026	2.7219	1.528	3.916	0.609	4.467	0	-0.0466	-0.053	-0.04	0.003	-14.082	0	0.8183	0.634	1.002	0.094	8.713	0	0.8078	0.589	1.027	0.112	7.227	0	-0.5192	-1.686	0.648	0.595	-0.872	0.383	0.0687
Cholesterolosis of gallbladder	digestive	-0.3573	-1.265	0.551	0.463	-0.771	0.699563	0.282239	1.73499	16	5535	10	2454	0.440501	0.807899	not_significant	-0.155173	0.356053	2.7225	1.528	3.917	0.609	4.469	0	-0.0466	-0.053	-0.04	0.003	-14.081	0	0.8171	0.633	1.001	0.094	8.7	0	0.8073	0.588	1.026	0.112	7.221	0	-0.5191	-1.686	0.648	0.595	-0.872	0.383	0.0701
Chondrocalcinosis	endocrine/metabolic	-0.0763	-2.854	2.701	1.417	-0.054	0.926538	0.0576134	14.8946	10	5541	10	2454	0.957056	0.989	not_significant	-0.0331367	0.0190625	2.7224	1.528	3.917	0.609	4.468	0	-0.0466	-0.053	-0.04	0.003	-14.081	0	0.8182	0.634	1.002	0.094	8.712	0	0.808	0.589	1.027	0.112	7.228	0	-0.5203	-1.687	0.647	0.595	-0.874	0.382	0.067
Chondromalacia		-0.4688	-1.294	0.356	0.421	-1.114	0.625753	0.274172	1.42761	13	5538	12	2452	0.265399	0.657044	not_significant	-0.203597	0.576101	2.7205	1.526	3.915	0.609	4.465	0	-0.0465	-0.053	-0.04	0.003	-14.07	0	0.8187	0.635	1.003	0.094	8.718	0	0.8074	0.588	1.026	0.112	7.224	0	-0.5197	-1.686	0.647	0.595	-0.873	0.383	0.068
Chromosomal anomalies	congenital anomalies	1.4693	0.28	2.659	0.607	2.421	4.34619	1.32313	14.282	43	5508	10	2454	0.0154985	0.127066	not_significant	0.638109	1.80971	2.6996	1.506	3.893	0.609	4.432	0	-0.046	-0.053	-0.04	0.003	-13.868	0	0.8181	0.634	1.002	0.094	8.707	0	0.8051	0.586	1.024	0.112	7.199	0	-0.5222	-1.688	0.644	0.595	-0.878	0.38	0.0626
Chromosomal anomalies and genetic disorders	congenital anomalies	0.6558	-0.947	2.258	0.818	0.802	1.92668	0.387903	9.56394	10	5541	10	2454	0.422546	0.794801	not_significant	0.28481	0.374126	2.7235	1.529	3.918	0.609	4.47	0	-0.0466	-0.053	-0.04	0.003	-14.093	0	0.8184	0.634	1.002	0.094	8.714	0	0.8068	0.588	1.026	0.112	7.217	0	-0.5211	-1.688	0.646	0.595	-0.875	0.381	0.0663
Chronic airway obstruction	respiratory	0.2851	-0.776	1.346	0.541	0.527	1.3299	0.460243	3.84203	11	5540	10	2454	0.598279	0.869101	not_significant	0.123817	0.223097	2.7257	1.531	3.92	0.609	4.473	0	-0.0467	-0.053	-0.04	0.003	-14.095	0	0.818	0.634	1.002	0.094	8.71	0	0.8083	0.589	1.027	0.112	7.23	0	-0.5207	-1.688	0.646	0.595	-0.875	0.382	0.0665
Chronic bronchitis	respiratory	-2.6658	-4.896	-0.435	1.138	-2.342	0.0695437	0.00747643	0.647265	10	5541	10	2454	0.0191639	0.14793	not_significant	-1.15774	1.71752	2.7232	1.529	3.917	0.609	4.47	0	-0.0466	-0.053	-0.04	0.003	-14.078	0	0.8166	0.633	1.001	0.094	8.693	0	0.808	0.589	1.027	0.112	7.223	0	-0.5176	-1.684	0.649	0.595	-0.87	0.385	0.07
Chronic cystitis	genitourinary	0.6084	-2.429	3.646	1.55	0.393	1.83749	0.0881249	38.3211	10	5541	10	2454	0.694677	0.904819	not_significant	0.264225	0.158217	2.7248	1.531	3.919	0.609	4.472	0	-0.0466	-0.053	-0.04	0.003	-14.093	0	0.8181	0.634	1.002	0.094	8.711	0	0.808	0.589	1.027	0.112	7.229	0	-0.5205	-1.687	0.646	0.595	-0.874	0.382	0.0669
Chronic dermatitis due to solar radiation	dermatologic	-1.1172	-2.185	-0.049	0.545	-2.051	0.327195	0.112478	0.952181	10	5541	12	2452	0.0403007	0.253894	not_significant	-0.485194	1.39469	2.7135	1.52	3.907	0.609	4.455	0	-0.0463	-0.053	-0.04	0.003	-14.009	0	0.8163	0.632	1	0.094	8.688	0	0.8072	0.588	1.026	0.112	7.22	0	-0.519	-1.685	0.647	0.595	-0.872	0.383	0.0696
Chronic fatigue syndrome	symptoms	-0.5082	-1.529	0.513	0.521	-0.975	0.601577	0.216752	1.67029	10	5541	10	2454	0.329335	0.732817	not_significant	-0.220708	0.482362	2.7203	1.526	3.914	0.609	4.465	0	-0.0465	-0.053	-0.04	0.003	-14.068	0	0.8184	0.634	1.002	0.094	8.715	0	0.8084	0.589	1.027	0.112	7.233	0	-0.5196	-1.686	0.647	0.595	-0.873	0.383	0.068
Chronic glomerulonephritis, NOS	genitourinary	0.2588	-2.237	2.755	1.274	0.203	1.29537	0.106778	15.721	10	5541	10	2454	0.838967	0.956423	not_significant	0.112395	0.0762551	2.7223	1.528	3.916	0.609	4.468	0	-0.0466	-0.053	-0.04	0.003	-14.085	0	0.8185	0.634	1.003	0.094	8.714	0	0.8083	0.589	1.027	0.112	7.231	0	-0.5205	-1.687	0.646	0.595	-0.874	0.382	0.0669
Chronic hepatitis	infectious diseases	0.3019	-1.133	1.737	0.732	0.412	1.35243	0.322066	5.68028	10	5541	10	2454	0.680182	0.899644	not_significant	0.131114	0.167375	2.7227	1.528	3.917	0.609	4.468	0	-0.0466	-0.053	-0.04	0.003	-14.089	0	0.8188	0.635	1.003	0.094	8.718	0	0.8086	0.59	1.028	0.112	7.233	0	-0.5208	-1.688	0.646	0.595	-0.875	0.382	0.0663
Chronic interstitial cystitis	genitourinary	0.6145	-1.178	2.407	0.914	0.672	1.84873	0.307894	11.1006	10	5541	10	2454	0.501589	0.837055	not_significant	0.266874	0.299652	2.7224	1.528	3.917	0.609	4.468	0	-0.0466	-0.053	-0.04	0.003	-14.093	0	0.8197	0.636	1.004	0.094	8.724	0	0.8094	0.59	1.029	0.112	7.239	0	-0.5209	-1.688	0.646	0.595	-0.875	0.382	0.066
Chronic kidney disease, Stage I or II	genitourinary	-0.4801	-1.168	0.208	0.351	-1.368	0.618722	0.310988	1.23121	20	5531	18	2446	0.171418	0.535736	not_significant	-0.208505	0.765945	2.7463	1.552	3.941	0.609	4.507	0	-0.0464	-0.053	-0.04	0.003	-14.01	0	0.8153	0.631	0.999	0.094	8.678	0	0.8039	0.585	1.023	0.112	7.189	0	-0.5486	-1.716	0.618	0.595	-0.922	0.357	0.0416
Chronic Kidney Disease, Stage III	genitourinary	0.2306	-0.682	1.143	0.466	0.495	1.25936	0.505605	3.13616	16	5535	10	2454	0.620377	0.881938	not_significant	0.100148	0.207344	2.7246	1.53	3.919	0.609	4.472	0	-0.0466	-0.053	-0.04	0.003	-14.097	0	0.8182	0.634	1.002	0.094	8.712	0	0.8083	0.589	1.027	0.112	7.231	0	-0.5206	-1.687	0.646	0.595	-0.874	0.382	0.0664
Chronic Kidney Disease, Stage IV	genitourinary	1.1699	-1.022	3.361	1.118	1.046	3.22167	0.359874	28.818	10	5541	10	2454	0.295412	0.698831	not_significant	0.508081	0.529571	2.7272	1.533	3.922	0.609	4.476	0	-0.0467	-0.053	-0.04	0.003	-14.106	0	0.8169	0.633	1.001	0.094	8.698	0	0.8082	0.589	1.027	0.112	7.23	0	-0.5214	-1.688	0.645	0.595	-0.876	0.381	0.067
Chronic laryngitis	respiratory	-0.5215	-3.642	2.599	1.592	-0.327	0.593629	0.0261999	13.4503	10	5541	10	2454	0.743302	0.921057	not_significant	-0.226485	0.128835	2.7227	1.529	3.917	0.609	4.469	0	-0.0466	-0.053	-0.04	0.003	-14.084	0	0.8172	0.633	1.001	0.094	8.698	0	0.8073	0.588	1.026	0.112	7.221	0	-0.5202	-1.687	0.647	0.595	-0.874	0.382	0.0679
Chronic lymphocytic thyroiditis	endocrine/metabolic	0.0076	-0.9	0.916	0.463	0.016	1.00763	0.40657	2.49927	20	5531	10	2454	0.986901	0.997462	not_significant	0.00330064	0.00572629	2.7226	1.528	3.917	0.609	4.468	0	-0.0466	-0.053	-0.04	0.003	-14.086	0	0.8182	0.634	1.002	0.094	8.712	0	0.808	0.589	1.027	0.112	7.228	0	-0.5203	-1.687	0.646	0.595	-0.874	0.382	0.067
Chronic osteomyelitis	musculoskeletal	1.9607	-0.23	4.151	1.118	1.754	7.1043	0.794534	63.4975	10	5541	10	2454	0.0793898	0.359961	not_significant	0.851521	1.10024	2.7236	1.529	3.918	0.61	4.468	0	-0.0467	-0.053	-0.04	0.003	-14.104	0	0.8252	0.641	1.009	0.094	8.778	0	0.8158	0.597	1.035	0.112	7.292	0	-0.5249	-1.692	0.642	0.596	-0.881	0.378	0.0626
Chronic pain	neurological	-0.6554	-0.851	-0.46	0.1	-6.57	0.519234	0.426988	0.631284	250	5301	233	2231	5.0237e-11	6.01337e-09	con_significant	-0.284637	10.299	2.7531	1.56	3.946	0.608	4.524	0	-0.0459	-0.052	-0.039	0.003	-13.817	0	0.7837	0.599	0.968	0.094	8.313	0	0.7626	0.543	0.983	0.112	6.792	0	-0.5079	-1.672	0.657	0.594	-0.855	0.393	0.0797
Chronic pain syndrome	neurological	0.381	-0.822	1.584	0.614	0.621	1.46375	0.439552	4.87441	11	5540	10	2454	0.534611	0.857259	not_significant	0.165466	0.271962	2.7219	1.528	3.916	0.609	4.467	0	-0.0466	-0.053	-0.04	0.003	-14.084	0	0.8191	0.635	1.003	0.094	8.721	0	0.8087	0.59	1.028	0.112	7.234	0	-0.5207	-1.688	0.646	0.595	-0.875	0.382	0.0659
Chronic pancreatitis	digestive	-0.3731	-1.664	0.918	0.659	-0.566	0.688596	0.18938	2.50428	10	5541	10	2454	0.571195	0.857259	not_significant	-0.162035	0.243215	2.7208	1.527	3.915	0.609	4.466	0	-0.0465	-0.053	-0.04	0.003	-14.068	0	0.818	0.634	1.002	0.094	8.711	0	0.8074	0.588	1.027	0.112	7.224	0	-0.5198	-1.687	0.647	0.595	-0.873	0.383	0.0679
Chronic pericarditis	circulatory system	-0.7106	-2.7	1.279	1.015	-0.7	0.491349	0.0672055	3.59304	10	5541	10	2454	0.483893	0.821781	not_significant	-0.30861	0.31525	2.7225	1.528	3.917	0.609	4.469	0	-0.0466	-0.053	-0.04	0.003	-14.08	0	0.8165	0.632	1.001	0.094	8.692	0	0.8058	0.587	1.025	0.112	7.207	0	-0.5189	-1.686	0.648	0.595	-0.872	0.383	0.0687
Chronic pharyngitis and nasopharyngitis	respiratory	0.2093	-0.337	0.755	0.279	0.751	1.23281	0.713909	2.12761	45	5506	22	2442	0.452459	0.807899	not_significant	0.0908978	0.344421	2.7249	1.53	3.919	0.609	4.471	0	-0.0467	-0.053	-0.04	0.003	-14.103	0	0.8215	0.637	1.006	0.094	8.737	0	0.8112	0.592	1.03	0.112	7.252	0	-0.5226	-1.69	0.645	0.595	-0.878	0.38	0.0633
Chronic prostatitis	genitourinary	0.8223	-0.527	2.172	0.689	1.194	2.27573	0.590373	8.77582	10	5541	10	2454	0.232453	0.616954	not_significant	0.35712	0.633665	2.7264	1.532	3.921	0.609	4.474	0	-0.0467	-0.053	-0.04	0.003	-14.109	0	0.8194	0.635	1.003	0.094	8.723	0	0.8085	0.589	1.028	0.112	7.233	0	-0.5206	-1.688	0.646	0.595	-0.874	0.382	0.0653
Chronic pulmonary heart disease	circulatory system	0.6762	-0.309	1.661	0.502	1.346	1.96639	0.734181	5.26457	15	5536	10	2454	0.178416	0.54445	not_significant	0.29367	0.748566	2.7362	1.541	3.931	0.61	4.488	0	-0.0469	-0.053	-0.04	0.003	-14.154	0	0.8202	0.636	1.004	0.094	8.728	0	0.8109	0.592	1.03	0.112	7.25	0	-0.5226	-1.69	0.645	0.596	-0.877	0.38	0.0636
Chronic renal failure [CKD]	genitourinary	0.3843	-0.228	0.997	0.312	1.23	1.46859	0.796124	2.71014	39	5512	18	2446	0.218775	0.606929	not_significant	0.166899	0.660002	2.7368	1.542	3.932	0.61	4.49	0	-0.0469	-0.053	-0.04	0.003	-14.142	0	0.8176	0.634	1.002	0.094	8.706	0	0.81	0.591	1.029	0.112	7.245	0	-0.5231	-1.69	0.644	0.596	-0.878	0.38	0.0638
Chronic sinusitis	respiratory	-0.5582	-0.836	-0.281	0.142	-3.941	0.572238	0.433441	0.755028	119	5432	110	2354	8.12746e-05	0.00221154	con_significant	-0.242423	4.09005	2.71	1.517	3.903	0.609	4.451	0	-0.0462	-0.053	-0.04	0.003	-13.948	0	0.8105	0.626	0.995	0.094	8.616	0	0.7932	0.574	1.013	0.112	7.085	0	-0.5012	-1.667	0.665	0.595	-0.842	0.4	0.0861
Chronic tonsillitis and adenoiditis	respiratory	-0.5294	-1.074	0.016	0.278	-1.904	0.588958	0.341639	1.01613	36	5515	25	2439	0.0568913	0.309525	not_significant	-0.229915	1.24495	2.7248	1.531	3.919	0.609	4.472	0	-0.0466	-0.053	-0.04	0.003	-14.092	0	0.8164	0.632	1	0.094	8.691	0	0.804	0.585	1.023	0.112	7.191	0	-0.5162	-1.683	0.651	0.595	-0.867	0.386	0.0743
Chronic ulcer of leg or foot	dermatologic	1.2165	-0.46	2.892	0.855	1.423	3.37535	0.631284	18.0293	10	5541	10	2454	0.154858	0.508562	not_significant	0.528319	0.810065	2.7314	1.537	3.926	0.609	4.482	0	-0.0468	-0.053	-0.04	0.003	-14.135	0	0.8189	0.635	1.003	0.094	8.721	0	0.8099	0.591	1.029	0.112	7.245	0	-0.5221	-1.689	0.645	0.595	-0.877	0.381	0.0651
Chronic ulcer of unspecified site	dermatologic	0.0531	-1.084	1.19	0.58	0.092	1.05454	0.33824	3.28708	10	5541	10	2454	0.92705	0.979416	not_significant	0.023061	0.0328969	2.7227	1.529	3.917	0.609	4.469	0	-0.0466	-0.053	-0.04	0.003	-14.087	0	0.8182	0.634	1.002	0.094	8.712	0	0.808	0.589	1.027	0.112	7.228	0	-0.5204	-1.687	0.646	0.595	-0.874	0.382	0.067
Chronic venous insufficiency [CVI]	circulatory system	0.8236	-0.608	2.255	0.73	1.128	2.27869	0.544439	9.53529	10	5541	10	2454	0.259367	0.650863	not_significant	0.357685	0.586086	2.731	1.536	3.926	0.609	4.481	0	-0.0468	-0.053	-0.04	0.003	-14.123	0	0.8188	0.635	1.003	0.094	8.719	0	0.8092	0.59	1.028	0.112	7.239	0	-0.5214	-1.688	0.646	0.595	-0.876	0.381	0.0649
Circadian rhythm sleep disorder	neurological	-0.2693	-0.881	0.342	0.312	-0.863	0.763914	0.414368	1.40776	29	5522	19	2445	0.388285	0.779084	not_significant	-0.116956	0.410849	2.7203	1.526	3.915	0.609	4.465	0	-0.0465	-0.053	-0.04	0.003	-14.072	0	0.8192	0.635	1.003	0.094	8.722	0	0.8079	0.589	1.027	0.112	7.228	0	-0.519	-1.686	0.648	0.595	-0.872	0.383	0.0681
Circulatory disease NEC	circulatory system	-1.0752	-2.328	0.178	0.639	-1.682	0.34123	0.0974905	1.19483	10	5541	10	2454	0.0925332	0.389992	not_significant	-0.466953	1.0337	2.7229	1.529	3.917	0.609	4.47	0	-0.0466	-0.053	-0.04	0.003	-14.077	0	0.815	0.631	0.999	0.094	8.674	0	0.8012	0.582	1.021	0.112	7.162	0	-0.5144	-1.681	0.652	0.595	-0.864	0.387	0.0713
Circumscribed scleroderma	dermatologic	-0.584	-2.58	1.412	1.018	-0.573	0.557663	0.075774	4.10416	10	5541	10	2454	0.566325	0.857259	not_significant	-0.253628	0.246935	2.7224	1.528	3.917	0.609	4.468	0	-0.0466	-0.053	-0.04	0.003	-14.086	0	0.8185	0.634	1.003	0.094	8.715	0	0.8088	0.59	1.028	0.112	7.235	0	-0.5202	-1.687	0.647	0.595	-0.874	0.382	0.0669
Cirrhosis of liver without mention of alcohol	digestive	-0.3659	-1.434	0.703	0.545	-0.671	0.693572	0.238354	2.0198	10	5541	10	2454	0.502093	0.837055	not_significant	-0.158908	0.299216	2.72	1.526	3.914	0.609	4.464	0	-0.0465	-0.053	-0.04	0.003	-14.064	0	0.8186	0.635	1.003	0.094	8.717	0	0.808	0.589	1.027	0.112	7.229	0	-0.5201	-1.687	0.647	0.595	-0.874	0.382	0.068
Colles' fracture		0.3621	-1.984	2.708	1.197	0.302	1.43634	0.137518	14.9992	10	5541	10	2454	0.762284	0.927456	not_significant	0.157258	0.117883	2.7226	1.528	3.917	0.609	4.469	0	-0.0466	-0.053	-0.04	0.003	-14.086	0	0.8181	0.634	1.002	0.094	8.711	0	0.808	0.589	1.027	0.112	7.228	0	-0.5203	-1.687	0.646	0.595	-0.874	0.382	0.0669
Colon cancer	neoplasms	0.0059	-1.246	1.258	0.639	0.009	1.00592	0.287653	3.51838	10	5541	10	2454	0.992585	0.997741	not_significant	0.00256234	0.00323228	2.7226	1.528	3.917	0.609	4.469	0	-0.0466	-0.053	-0.04	0.003	-14.086	0	0.8182	0.634	1.002	0.094	8.712	0	0.808	0.589	1.027	0.112	7.228	0	-0.5203	-1.687	0.646	0.595	-0.874	0.382	0.067
Color vision deficiencies	sense organs	-1.7293	-3.998	0.539	1.158	-1.494	0.177409	0.0183523	1.71429	10	5541	10	2454	0.135169	0.478691	not_significant	-0.751025	0.869122	2.7278	1.534	3.922	0.609	4.477	0	-0.0467	-0.053	-0.04	0.003	-14.107	0	0.8145	0.63	0.999	0.094	8.668	0	0.803	0.584	1.022	0.112	7.18	0	-0.5171	-1.684	0.65	0.595	-0.869	0.385	0.0688
Coma	neurological	-0.7678	-3.632	2.097	1.462	-0.525	0.464033	0.0264632	8.14171	10	5541	10	2454	0.599333	0.869578	not_significant	-0.333451	0.222332	2.7236	1.529	3.918	0.609	4.47	0	-0.0466	-0.053	-0.04	0.003	-14.093	0	0.8184	0.634	1.002	0.094	8.714	0	0.8081	0.589	1.027	0.112	7.229	0	-0.5204	-1.687	0.646	0.595	-0.874	0.382	0.0669
Complex regional/central pain syndrome	neurological	-1.1968	-2.6	0.206	0.716	-1.672	0.30216	0.0742736	1.22875	10	5541	10	2454	0.0945647	0.394627	not_significant	-0.519764	1.02427	2.7216	1.527	3.916	0.609	4.467	0	-0.0466	-0.053	-0.04	0.003	-14.08	0	0.8187	0.635	1.003	0.094	8.716	0	0.8062	0.587	1.025	0.112	7.212	0	-0.5182	-1.685	0.649	0.595	-0.87	0.384	0.0669
Complication due to other implant and internal device	injuries & poisonings	0.4652	-0.718	1.649	0.604	0.771	1.59233	0.487727	5.20178	12	5539	10	2454	0.440958	0.807899	not_significant	0.202034	0.355603	2.721	1.527	3.915	0.609	4.465	0	-0.0466	-0.053	-0.04	0.003	-14.078	0	0.8202	0.636	1.004	0.094	8.73	0	0.8104	0.591	1.03	0.112	7.248	0	-0.5217	-1.689	0.645	0.595	-0.876	0.381	0.0652
Complication of colostomy or enterostomy	injuries & poisonings	-0.9883	-3.459	1.483	1.261	-0.784	0.372209	0.0314612	4.40614	10	5541	10	2454	0.433104	0.803115	not_significant	-0.429213	0.363408	2.7222	1.528	3.916	0.609	4.468	0	-0.0466	-0.053	-0.04	0.003	-14.079	0	0.8172	0.633	1.001	0.094	8.701	0	0.8065	0.587	1.026	0.112	7.215	0	-0.5193	-1.686	0.647	0.595	-0.872	0.383	0.0676
Complication of internal orthopedic device	injuries & poisonings	-0.763	-1.484	-0.042	0.368	-2.074	0.466266	0.226729	0.95887	15	5536	18	2446	0.0381097	0.243943	not_significant	-0.331367	1.41897	2.7285	1.534	3.922	0.609	4.479	0	-0.0467	-0.053	-0.04	0.003	-14.109	0	0.8134	0.629	0.998	0.094	8.654	0	0.803	0.584	1.022	0.112	7.18	0	-0.5175	-1.684	0.649	0.595	-0.869	0.385	0.0708
Complication of nervous system device, implant, and graft		0.3271	-1.916	2.57	1.144	0.286	1.38694	0.147195	13.0658	10	5541	10	2454	0.774981	0.937969	not_significant	0.142058	0.110709	2.7222	1.528	3.916	0.609	4.468	0	-0.0466	-0.053	-0.04	0.003	-14.083	0	0.8181	0.634	1.002	0.094	8.711	0	0.808	0.589	1.027	0.112	7.228	0	-0.5203	-1.687	0.647	0.595	-0.874	0.382	0.0668
Complications of cardiac/vascular device, implant, and graft	injuries & poisonings	0.4558	-0.502	1.414	0.489	0.933	1.57743	0.605319	4.11237	18	5533	10	2454	0.35104	0.753195	not_significant	0.197951	0.454643	2.7208	1.527	3.915	0.609	4.466	0	-0.0465	-0.053	-0.04	0.003	-14.075	0	0.819	0.635	1.003	0.094	8.719	0	0.8095	0.59	1.029	0.112	7.24	0	-0.5211	-1.688	0.646	0.595	-0.875	0.381	0.0657
Complications of surgical and medical procedures		-0.5718	-1.155	0.011	0.297	-1.923	0.564508	0.315058	1.01106	28	5523	24	2440	0.0544992	0.305961	not_significant	-0.24833	1.26361	2.7233	1.529	3.917	0.609	4.471	0	-0.0465	-0.053	-0.04	0.003	-14.079	0	0.8138	0.63	0.998	0.094	8.66	0	0.7995	0.58	1.019	0.112	7.146	0	-0.5129	-1.679	0.654	0.595	-0.862	0.389	0.0731
Complications of transplants and reattached limbs	injuries & poisonings	-0.6569	-1.198	-0.116	0.276	-2.38	0.518456	0.301797	0.890475	30	5521	31	2433	0.0173349	0.139261	not_significant	-0.285288	1.76108	2.7208	1.527	3.915	0.609	4.467	0	-0.0465	-0.053	-0.04	0.003	-14.05	0	0.8136	0.629	0.998	0.094	8.659	0	0.7982	0.579	1.017	0.112	7.135	0	-0.5126	-1.679	0.654	0.595	-0.861	0.389	0.0737
Concussion	injuries & poisonings	-0.1909	-0.92	0.538	0.372	-0.514	0.826215	0.398519	1.71258	18	5533	14	2450	0.607565	0.873421	not_significant	-0.0829068	0.216407	2.7202	1.526	3.914	0.609	4.465	0	-0.0465	-0.053	-0.04	0.003	-14.061	0	0.8182	0.634	1.002	0.094	8.713	0	0.8071	0.588	1.026	0.112	7.22	0	-0.5193	-1.686	0.647	0.595	-0.872	0.383	0.0677
Conductive hearing loss	sense organs	-0.8319	-1.579	-0.085	0.381	-2.182	0.435222	0.206181	0.918512	15	5536	16	2448	0.0291024	0.194612	not_significant	-0.36129	1.53607	2.7172	1.523	3.911	0.609	4.461	0	-0.0464	-0.053	-0.04	0.003	-14.039	0	0.8164	0.632	1.001	0.094	8.691	0	0.8029	0.584	1.022	0.112	7.181	0	-0.5159	-1.682	0.651	0.595	-0.867	0.386	0.0747
Congenital anomalies of abdominal wall; diaphram	congenital anomalies	0.6222	-2.225	3.469	1.453	0.428	1.86302	0.108067	32.1046	10	5541	10	2454	0.668426	0.89198	not_significant	0.270218	0.174947	2.7244	1.53	3.919	0.609	4.471	0	-0.0466	-0.053	-0.04	0.003	-14.095	0	0.8181	0.634	1.002	0.094	8.711	0	0.8074	0.588	1.026	0.112	7.223	0	-0.5205	-1.687	0.646	0.595	-0.874	0.382	0.067
Congenital anomalies of breast	genitourinary	-1.7764	-4.1	0.547	1.185	-1.499	0.169246	0.0165727	1.72806	10	5541	10	2454	0.133966	0.477866	not_significant	-0.771481	0.873004	2.7186	1.524	3.913	0.609	4.461	0	-0.0465	-0.053	-0.04	0.003	-14.067	0	0.8213	0.637	1.005	0.094	8.742	0	0.8075	0.588	1.027	0.112	7.224	0	-0.5176	-1.685	0.649	0.595	-0.869	0.385	0.0656
Congenital anomalies of face and neck	congenital anomalies	-0.5738	-2.015	0.867	0.735	-0.78	0.563381	0.13332	2.37976	10	5541	10	2454	0.435107	0.803739	not_significant	-0.249198	0.361404	2.7214	1.527	3.916	0.609	4.467	0	-0.0466	-0.053	-0.04	0.003	-14.079	0	0.8187	0.635	1.003	0.094	8.717	0	0.8087	0.59	1.028	0.112	7.235	0	-0.5202	-1.687	0.647	0.595	-0.874	0.382	0.0672
Congenital anomalies of genital organs	congenital anomalies	0.272	-0.372	0.916	0.329	0.827	1.31259	0.689354	2.49927	42	5509	13	2451	0.408001	0.794036	not_significant	0.118128	0.389339	2.7164	1.522	3.911	0.609	4.459	0	-0.0464	-0.053	-0.04	0.003	-14.025	0	0.8184	0.634	1.002	0.094	8.712	0	0.8081	0.589	1.027	0.112	7.229	0	-0.521	-1.688	0.646	0.595	-0.875	0.381	0.066
Congenital anomalies of great vessels	congenital anomalies	-0.6408	-2.659	1.378	1.03	-0.622	0.526871	0.0700182	3.96696	10	5541	10	2454	0.533825	0.857259	not_significant	-0.278296	0.272601	2.7221	1.528	3.916	0.609	4.468	0	-0.0466	-0.053	-0.04	0.003	-14.085	0	0.8188	0.635	1.003	0.094	8.718	0	0.8079	0.589	1.027	0.112	7.228	0	-0.5199	-1.687	0.647	0.595	-0.873	0.383	0.0667
Congenital anomalies of intestine	congenital anomalies	0.7605	-0.847	2.368	0.82	0.927	2.13935	0.428699	10.676	10	5541	10	2454	0.353905	0.753195	not_significant	0.330281	0.451113	2.7202	1.526	3.914	0.609	4.465	0	-0.0465	-0.053	-0.04	0.003	-14.069	0	0.8188	0.635	1.003	0.094	8.718	0	0.8089	0.59	1.028	0.112	7.237	0	-0.5207	-1.687	0.646	0.595	-0.875	0.382	0.0666
Congenital anomalies of male genital organs	congenital anomalies	0.2673	-0.3	0.835	0.29	0.923	1.30643	0.740818	2.30481	50	5501	18	2446	0.355933	0.753195	not_significant	0.116087	0.448631	2.718	1.524	3.912	0.609	4.46	0	-0.0465	-0.053	-0.04	0.003	-14.056	0	0.8212	0.637	1.005	0.094	8.737	0	0.8113	0.592	1.031	0.112	7.254	0	-0.5227	-1.69	0.644	0.595	-0.878	0.38	0.0639
[truncated: 917 more rows]
[truncated: 24 more columns]

## Sheet: before_hosp
phenotype	phecode_category	coef_has_phenotype	ci_lb_has_phenotype	ci_ub_has_phenotype	std err_has_phenotype	z_has_phenotype	odds_ratio_has_phenotype	ci_lb_or_has_phenotype	ci_ub_or_has_phenotype	Count_mi	Count_r_mi	Count_con	Count_r_con	pval_has_phenotype	pval_BH_adj_has_phenotype	significance_bh	log10_OR_has_phenotype	-log10_pval_has_phenotype	coef_Intercept	ci_lb_Intercept	ci_ub_Intercept	std err_Intercept	z_Intercept	pval_Intercept	coef_mi_or_vas_est_age	ci_lb_mi_or_vas_est_age	ci_ub_mi_or_vas_est_age	std err_mi_or_vas_est_age	z_mi_or_vas_est_age	pval_mi_or_vas_est_age	coef_num_visits_before	ci_lb_num_visits_before	ci_ub_num_visits_before	std err_num_visits_before	z_num_visits_before	pval_num_visits_before	coef_emr_months_before	ci_lb_emr_months_before	ci_ub_emr_months_before	std err_emr_months_before	z_emr_months_before	pval_emr_months_before	converged
[truncated: 1,197 more rows]

[truncated: 1 more sheets: legend]
