# Supplementary material for: Leveraging Electronic Medical Records from Two Hospital Systems Identifies Male Infertility Associated Comorbidities Across Time
Source: Research Square preprint supplement (doi:10.21203/rs.3.rs-3706493/v1), 2023-12-07
Supplement: Supplementary file 2 [file 1904e5ee68744aa6d43254b8.xlsx]

## Sheet: mi_before_hosp
phenotype	phecode_category
Hyperlipidemia	endocrine/metabolic
Persons with potential health hazards related to socioeconomic, psychosocial, and other circumstances

## Sheet: mi_before_primary
phenotype	phecode_category
Ascites (non malignant)	digestive
Asphyxia and hypoxemia
Bacteremia	infectious diseases
Cerebral artery occlusion, with cerebral infarction	circulatory system
Disease of tricuspid valve	circulatory system
Essential hypertension	circulatory system
Gram negative septicemia	infectious diseases
Late effects of cerebrovascular disease	circulatory system
Malignant neoplasm of liver, primary	neoplasms
Morbid obesity	endocrine/metabolic
Multiple myeloma	neoplasms
Orthopnea	respiratory
Other disorders of biliary tract	digestive
Other pulmonary inflamation or edema	respiratory
Shock	symptoms
Viral hepatitis B	infectious diseases
severe protein-calorie malnutrition	endocrine/metabolic

## Sheet: mi_before_primary_hosp
phenotype	phecode_category
Prostatitis	genitourinary

## Sheet: mi_before_primary_sdoh
phenotype	phecode_category
Abnormal coagulation profile	hematopoietic
Abnormal findings examination of lungs	respiratory
Acidosis	endocrine/metabolic
Acquired absence of organs
Adult failure to thrive	endocrine/metabolic
Adverse drug events and drug allergies	injuries & poisonings
Adverse effects of antibacterials (not penicillins)	injuries & poisonings
Alkalosis	endocrine/metabolic
Altered mental status	mental disorders
Anemia of chronic disease	hematopoietic
Aspergillosis	infectious diseases
Blood vessel replaced	circulatory system
Bronchiectasis	respiratory
Cachexia	endocrine/metabolic
Cancer of brain	neoplasms
Cancer, suspected or other	neoplasms
Cerebral edema and compression of brain	neurological
Chemotherapy	neoplasms
Chronic Kidney Disease, Stage IV	genitourinary
Chronic pulmonary heart disease	circulatory system
Chronic ulcer of leg or foot	dermatologic
Chronic venous insufficiency [CVI]	circulatory system
Cirrhosis of liver without mention of alcohol	digestive
Coma	neurological
Complication due to other implant and internal device	injuries & poisonings
Complications of surgical and medical procedures
Complications of transplants and reattached limbs	injuries & poisonings
Coronary atherosclerosis	circulatory system
Decubitus ulcer	dermatologic
Deep vein thrombosis [DVT]	circulatory system
Degenerative disease of the spinal cord	neurological
Dependence on respirator [Ventilator] or supplemental oxygen	respiratory
Diabetes type 2 with peripheral circulatory disorders	endocrine/metabolic
Diseases of pancreas	digestive
Disorders involving the immune mechanism	endocrine/metabolic
Disorders of magnesium metabolism	endocrine/metabolic
Disorders of phosphorus metabolism	endocrine/metabolic
E. coli	infectious diseases
Effects radiation NOS	injuries & poisonings
Elevated white blood cell count	hematopoietic
Fluid overload	endocrine/metabolic
Glucocorticoid deficiency	endocrine/metabolic
Gram positive septicemia	infectious diseases
Heart failure with preserved EF [Diastolic heart failure]	circulatory system
Heart failure with reduced EF [Systolic or combined heart failure]	circulatory system
Hormones and synthetic substitutes causing adverse effects in therapeutic use	injuries & poisonings
Hyperestrogenism	endocrine/metabolic
Hyperosmolality and/or hypernatremia	endocrine/metabolic
Hyperparathyroidism	endocrine/metabolic
Hyperpotassemia	endocrine/metabolic
Hypertensive heart and/or renal disease	circulatory system
Hypocalcemia	endocrine/metabolic
Hypoglycemia	endocrine/metabolic
Hypopotassemia	endocrine/metabolic
Hypotension NOS	circulatory system
Hypovolemia	endocrine/metabolic
Immunity deficiency	endocrine/metabolic
Infection with drug-resistant microorganisms	infectious diseases
Inflammatory and toxic neuropathy	neurological
Insulin pump user	endocrine/metabolic
Iron deficiency anemia secondary to blood loss (chronic)	hematopoietic
Leukemia	neoplasms
Lung disease due to external agents	respiratory
Lymphadenitis	hematopoietic
Lymphoid leukemia, acute	neoplasms
Lymphoid leukemia, chronic	neoplasms
Malignant neoplasm, other	neoplasms
Manlignant and unknown neoplasms of brain and nervous system	neoplasms
Methicillin sensitive Staphylococcus aureus	infectious diseases
Myocardial infarction	circulatory system
Nephritis and nephropathy in diseases classified elsewhere	genitourinary
Nephritis and nephropathy with pathological lesion	genitourinary
Neutropenia	hematopoietic
Nonrheumatic aortic valve disorders	circulatory system
Opiates and related narcotics causing adverse effects in therapeutic use	injuries & poisonings
Osteoarthritis; localized	musculoskeletal
Other abnormality of urination	genitourinary
Other and unspecified congenital anomalies	congenital anomalies
Other diseases of lung	respiratory
Other disorders of arteries and arterioles	circulatory system
Other disorders of bladder	genitourinary
Other disorders of stomach and duodenum	digestive
Other disorders of the kidney and ureters	genitourinary
Other infectious and parasitic diseases	infectious diseases
Other specified disorders of plasma protein metabolism	endocrine/metabolic
Other venous embolism and thrombosis	circulatory system
Pancytopenia	hematopoietic
Peritonitis and retroperitoneal infections	digestive
Pleurisy; pleural effusion	respiratory
Polycythemia vera	neoplasms
Protein-calorie malnutrition	endocrine/metabolic
Pulmonary collapse; interstitial and compensatory emphysema	respiratory
Pulmonary congestion and hypostasis	respiratory
Pyelonephritis	genitourinary
Renal failure NOS	genitourinary
Respiratory failure	respiratory
Secondary diabetes mellitus	endocrine/metabolic
Secondary malignancy of bone	neoplasms
Secondary malignancy of lymph nodes	neoplasms
Secondary malignancy of respiratory organs	neoplasms
Secondary malignant neoplasm	neoplasms
Secondary thrombocytopenia	hematopoietic
Secondary/extrinsic cardiomyopathies	circulatory system
Sepsis	injuries & poisonings
Septicemia	infectious diseases
Solitary pulmonary nodule	respiratory
Streptococcus infection	infectious diseases
Stricture/obstruction of ureter	genitourinary
Thrombocytopenia	hematopoietic
Transient cerebral ischemia	circulatory system
Urethral stricture (not specified as infectious)	genitourinary

## Sheet: mi_before_primary_sdoh_hosp
phenotype	phecode_category
Abnormal spermatozoa	genitourinary
Acute renal failure	genitourinary
Anemia in chronic kidney disease	hematopoietic
Anterior pituitary disorders
Antineoplastic and immunosuppressive drugs causing adverse effects	injuries & poisonings
Benign neoplasm of pituitary gland and craniopharyngeal duct (pouch)	neoplasms
Bone marrow or stem cell transplant	neoplasms
Cancer of connective tissue	neoplasms
Cancer of prostate	neoplasms
Cataract	sense organs
Chromosomal anomalies	congenital anomalies
Chronic Kidney Disease, Stage III	genitourinary
Chronic renal failure [CKD]	genitourinary
Circulatory disease NEC	circulatory system
Complications of cardiac/vascular device, implant, and graft	injuries & poisonings
Congenital anomalies of genital organs	congenital anomalies
Congenital anomalies of male genital organs	congenital anomalies
Congestive heart failure (CHF) NOS	circulatory system
Constipation	digestive
Cystic fibrosis	respiratory
Cystic kidney disease	congenital anomalies
Decreased libido	mental disorders
Diabetic retinopathy	endocrine/metabolic
Disorders of the pituitary gland and its hypothalamic control	endocrine/metabolic
Dysuria	genitourinary
Elevated prostate specific antigen [PSA]	genitourinary
End stage renal disease	genitourinary
Erectile dysfunction [ED]	genitourinary
Flatulence	digestive
Frequency of urination and polyuria	genitourinary
Functional digestive disorders	digestive
Functional disorders of bladder	genitourinary
Hodgkin's disease	neoplasms
Hyperplasia of prostate	genitourinary
Hypertensive chronic kidney disease	circulatory system
Hypertrophy of breast (Gynecomastia)	genitourinary
Hyposmolality and/or hyponatremia	endocrine/metabolic
Hypothyroidism NOS	endocrine/metabolic
Infertility, female	genitourinary
Injuries to the nervous system	injuries & poisonings
Iron deficiency anemias, unspecified or not due to blood loss	hematopoietic
Kidney replaced by transpant	genitourinary
Malignant neoplasm of testis	neoplasms
Osteoporosis NOS	musculoskeletal
Other abnormal blood chemistry	symptoms
Other anemias	hematopoietic
Other diseases of blood and blood-forming organs	hematopoietic
Other disorders of testis	genitourinary
Other endocrine disorders	endocrine/metabolic
Other hypertensive complications	circulatory system
Other nutritional deficiency	endocrine/metabolic
Other paralytic syndromes	neurological
Pituitary hyperfunction	endocrine/metabolic
Pituitary hypofunction	endocrine/metabolic
Polycythemia, secondary	hematopoietic
Proteinuria	endocrine/metabolic
Renal dialysis	genitourinary
Retention of urine	genitourinary
Secondary hyperparathyroidism (of renal origin)	genitourinary
Senile cataract	sense organs
Sexual and gender identity disorders	mental disorders
Spinal cord injury without evidence of spinal bone injury	injuries & poisonings
Substance addiction and disorders	mental disorders
Testicular dysfunction	endocrine/metabolic
Testicular hypofunction	endocrine/metabolic
Type 2 diabetes	endocrine/metabolic
Type 2 diabetes with neurological manifestations	endocrine/metabolic
Type 2 diabetes with ophthalmic manifestations	endocrine/metabolic
Type 2 diabetes with renal manifestations	endocrine/metabolic
Urinary incontinence	genitourinary
Urinary tract infection	genitourinary
Varicose veins	circulatory system
Viral hepatitis C	infectious diseases
Vitamin B-complex deficiencies	endocrine/metabolic
Vitamin D deficiency	endocrine/metabolic
screening for infectious and parasitic diseases

## Sheet: mi_before_sdoh
phenotype	phecode_category
Eosinophilia	hematopoietic
Other disorders of male genital organs	genitourinary
Other forms of chronic heart disease	circulatory system

## Sheet: mi_before_sdoh_hosp
phenotype	phecode_category
Lipoma	neoplasms

## Sheet: con_before_primary
phenotype	phecode_category
Celiac disease	digestive
Ganglion and cyst of synovium, tendon, and bursa	musculoskeletal
Hemangioma and lymphangioma, any site	neoplasms
Inflammation of eyelids	sense organs
Lipoma of skin and subcutaneous tissue	neoplasms
Open wound of finger(s)	injuries & poisonings
Otalgia	sense organs
Superficial cellulitis and abscess	dermatologic
Synovitis and tenosynovitis	musculoskeletal
Thoracic or lumbosacral neuritis or radiculitis, unspecified	symptoms

## Sheet: con_before_primary_sdoh
phenotype	phecode_category
Acute tonsillitis	respiratory
Allergic rhinitis	respiratory
Asthma	respiratory
Asthma with exacerbation	respiratory
Contusion	injuries & poisonings
Enthesopathy	musculoskeletal
Eustachian tube disorders	sense organs
Influenza	respiratory
Migrain with aura	neurological
Migraine	neurological
Orchitis and epididymitis	genitourinary
Other diseases of respiratory system, NEC	respiratory
Other hypertrophic and atrophic conditions of skin	dermatologic
Other tests
Otitis media	sense organs
Pain in joint	musculoskeletal
Pain in limb	symptoms
Peripheral enthesopathies and allied syndromes	musculoskeletal
Sebaceous cyst	dermatologic
Sprains and strains	injuries & poisonings
screening for malignant neoplasms

## Sheet: con_before_primary_sdoh_hosp
phenotype	phecode_category
Actinic keratosis	dermatologic
Acute pain	neurological
Acute pharyngitis	respiratory
Acute sinusitis	respiratory
Acute upper respiratory infections of multiple or unspecified sites	respiratory
Benign neoplasm of skin	neoplasms
Bronchitis	respiratory
Chronic dermatitis due to solar radiation	dermatologic
Chronic sinusitis	respiratory
Chronic tonsillitis and adenoiditis	respiratory
Conjunctivitis, infectious	sense organs
Cough	respiratory
Disorder of skin and subcutaneous tissue NOS	dermatologic
Elevated blood pressure reading without diagnosis of hypertension	circulatory system
Family history
Fracture of ankle and foot	injuries & poisonings
Hemangioma of skin and subcutaneous tissue	neoplasms
Injury, NOS
Joint/ligament sprain	injuries & poisonings
Neoplasm of uncertain behavior of skin	neoplasms
Nevus, non-neoplastic	neoplasms
Other derangement of joint	musculoskeletal
Other dyschromia	dermatologic
Other upper respiratory disease	respiratory
Otitis externa	sense organs
Persons encountering health services in circumstances related to reproduction
Sciatica	symptoms
Screening for malignant neoplasms of the skin
Seborrheic keratosis	dermatologic
Suppurative and unspecified otitis media	sense organs
Viral warts & HPV	infectious diseases
potential health hazards related to communicable diseases potential health hazards related to communicable diseases

[truncated: 1 more sheets: con_before_sdoh]
