# Supplementary material for: Leveraging Electronic Medical Records from Two Hospital Systems Identifies Male Infertility Associated Comorbidities Across Time
Source: Research Square preprint supplement (doi:10.21203/rs.3.rs-3706493/v1), 2023-12-07
Supplement: Supplementary file 3 [file 20f46f4dd500819716919139.xlsx]

## Sheet: mi_b4_both
phenotype	phecode_category	odds_ratio_has_phenotype_uc	Count_mi_uc	pct_mi_uc	odds_ratio_has_phenotype_stanford	Count_mi_stanford	pct_mi_stanford
Testicular hypofunction	endocrine/metabolic	10.988	1411	21.6	13.8405	1489	26.82
Varicose veins	circulatory system	5.20386	991	15.17	5.93104	444	8
Abnormal spermatozoa	genitourinary	23.6107	806	12.34	40.4352	276	4.97
Erectile dysfunction [ED]	genitourinary	2.2796	742	11.36	1.53864	434	7.82
Other anemias	hematopoietic	1.82869	226	3.46	2.44905	221	3.98
Type 2 diabetes	endocrine/metabolic	2.30827	219	3.35	1.75945	175	3.15
Decreased libido	mental disorders	2.1274	191	2.92	1.99771	105	1.89
Hypothyroidism NOS	endocrine/metabolic	1.97447	154	2.36	1.64856	171	3.08
Hyperplasia of prostate	genitourinary	2.07861	144	2.2	1.7635	116	2.09
Infertility, female	genitourinary	48.1249	74	1.13	26.6716	558	10.05
Other disorders of testis	genitourinary	9.21654	71	1.09	9.47351	223	4.02
Pituitary hypofunction	endocrine/metabolic	5.90146	57	0.87	25.8032	41	0.74
Elevated prostate specific antigen [PSA]	genitourinary	1.97112	51	0.78	3.42568	50	0.9
Anterior pituitary disorders		7.91769	40	0.61	10.196	33	0.59
Cancer of prostate	neoplasms	3.69692	35	0.54	5.48436	17	0.31

## Sheet: mi_aft_both
phenotype	phecode_category	odds_ratio_has_phenotype_uc	Count_mi_uc	pct_mi_uc	odds_ratio_has_phenotype_stanford	Count_mi_stanford	pct_mi_stanford
Testicular hypofunction	endocrine/metabolic	3.36693	259	3.97	5.66553	280	5.04
Abnormal spermatozoa	genitourinary	6.89847	128	1.96	9.10843	65	1.17

## Sheet: con_b4_both
phenotype	phecode_category	odds_ratio_has_phenotype_uc	Count_con_uc	pct_con_uc	odds_ratio_has_phenotype_stanford	Count_con_stanford	pct_con_stanford
Benign neoplasm of skin	neoplasms	0.504191	1218	14.58	0.41632	318	12.91
Acute upper respiratory infections of multiple or unspecified sites	respiratory	0.51742	974	11.66	0.505807	265	10.75
Injury, NOS		0.682973	912	10.92	0.552998	212	8.6
Acute pharyngitis	respiratory	0.532539	699	8.37	0.537568	176	7.14
Disorder of skin and subcutaneous tissue NOS	dermatologic	0.652594	673	8.06	0.555659	106	4.3
Acute sinusitis	respiratory	0.470058	571	6.84	0.469259	145	5.88
Other dyschromia	dermatologic	0.509055	516	6.18	0.429772	141	5.72
Viral warts & HPV	infectious diseases	0.513605	515	6.17	0.3984	128	5.19
Neoplasm of uncertain behavior of skin	neoplasms	0.563606	507	6.07	0.424052	125	5.07
Seborrheic keratosis	dermatologic	0.527292	498	5.96	0.455117	115	4.67
Joint/ligament sprain	injuries & poisonings	0.590078	458	5.48	0.349973	120	4.87
Chronic sinusitis	respiratory	0.672872	410	4.91	0.505049	110	4.46
Acute pain	neurological	0.684683	387	4.63	0.397047	97	3.94
Hemangioma of skin and subcutaneous tissue	neoplasms	0.414783	295	3.53	0.23662	33	1.34
Other derangement of joint	musculoskeletal	0.641979	208	2.49	0.230179	61	2.48
Nevus, non-neoplastic	neoplasms	0.449554	177	2.12	0.395779	104	4.22
Fracture of ankle and foot	injuries & poisonings	0.484179	124	1.48	0.298346	31	1.26

## Sheet: legend
column	description
phenotype	patient diagnosis, represented as phecode-corresponding phenotype
phecode_category	disease category of phenotype
odds_ratio_has_phenotype_uc	odds ratio for having phenotype at UC (primary analysis)
Count_mi_uc	number of male infertility patients with phenotype at UC
pct_mi_uc	percentage of male infertility patients with phenotype at UC
Count_con_uc	number of vasectomy (control) patients with phenotype at UC
pct_con_uc	percentage of vasectomy (control) patients with phenotype at UC
odds_ratio_has_phenotype_stanford	odds ratio for having phenotype at Stanford (primary analysis)
Count_mi_stanford	number of male infertility patients with phenotype at Stanford
pct_mi_stanford	percentage of male infertility patients with phenotype at Stanford
Count_con_stanford	number of vasectomy (control) patients with phenotype at Stanford
pct_con_stanford	percentage of vasectomy (control) patients with phenotype at Stanford
