# Supplementary material for: Leveraging Electronic Medical Records from Two Hospital Systems Identifies Male Infertility Associated Comorbidities Across Time
Source: Research Square preprint supplement (doi:10.21203/rs.3.rs-3706493/v1), 2023-12-07
Supplement: Supplementary file 4 [file 2961ea4bfd58fcc14cf5d467.xlsx]

## Sheet: mi_after_primary
phenotype	phecode_category
Anal and rectal conditions	digestive
Astigmatism	sense organs
Disorders of vitreous body	sense organs
Intestinal disaccharidase deficiencies and disaccharide malabsorption	endocrine/metabolic
Tachycardia NOS	circulatory system
Vitamin B-complex deficiencies	endocrine/metabolic

## Sheet: mi_after_primary_sdoh
phenotype	phecode_category
Abdominal pain	symptoms
Abnormal electrocardiogram [ECG] [EKG]	circulatory system
Acute upper respiratory infections of multiple or unspecified sites	respiratory
Allergic rhinitis	respiratory
Asthma	respiratory
Atopic/contact dermatitis due to other or unspecified	dermatologic
Atrial fibrillation	circulatory system
Atrial flutter	circulatory system
Back pain	symptoms
Cataract	sense organs
Cervicalgia	symptoms
Cholelithiasis	digestive
Chronic Kidney Disease, Stage III	genitourinary
Coronary atherosclerosis	circulatory system
Cough	respiratory
Disturbance of skin sensation	dermatologic
Dry eyes	sense organs
Edema	symptoms
Elevated prostate specific antigen [PSA]	genitourinary
Elevated white blood cell count	hematopoietic
Essential hypertension	circulatory system
Fever of unknown origin	symptoms
Flatulence	digestive
Frequency of urination and polyuria	genitourinary
Glaucoma	sense organs
Hematuria	genitourinary
Hyperlipidemia	endocrine/metabolic
Hyperplasia of prostate	genitourinary
Hypertensive chronic kidney disease	circulatory system
Hypothyroidism NOS	endocrine/metabolic
Hypovolemia	endocrine/metabolic
Inflammatory and toxic neuropathy	neurological
Influenza	respiratory
Insomnia	neurological
Iron deficiency anemias, unspecified or not due to blood loss	hematopoietic
Malaise and fatigue	symptoms
Myalgia and myositis unspecified	symptoms
Nonspecific chest pain	circulatory system
Osteoporosis NOS	musculoskeletal
Other abnormal blood chemistry	symptoms
Other abnormal glucose	endocrine/metabolic
Other abnormality of urination	genitourinary
Other anemias	hematopoietic
Other chronic nonalcoholic liver disease	digestive
Other diseases of lung	respiratory
Other disorders of liver	digestive
Other disorders of testis	genitourinary
Other headache syndromes	neurological
Other tests	None
Pain in joint	musculoskeletal
Pleurisy; pleural effusion	respiratory
Pulmonary collapse; interstitial and compensatory emphysema	respiratory
Retention of urine	genitourinary
Senile cataract	sense organs
Solitary pulmonary nodule	respiratory
Thrombocytopenia	hematopoietic
Type 2 diabetes	endocrine/metabolic
Type 2 diabetes with neurological manifestations	endocrine/metabolic
Type 2 diabetes with renal manifestations	endocrine/metabolic
Varicose veins	circulatory system
Vitamin D deficiency	endocrine/metabolic
Voice disturbance	respiratory
Wheezing	respiratory

## Sheet: mi_after_primary_sdoh_hosp
phenotype	phecode_category
Abnormal spermatozoa	genitourinary
Other ill-defined and unknown causes of morbidity and mortality	None
Testicular hypofunction	endocrine/metabolic

## Sheet: mi_after_sdoh
phenotype	phecode_category
Abnormal findings examination of lungs	respiratory
Acquired absence of organs	None
Acute renal failure	genitourinary
Arthropathy NOS	musculoskeletal
Benign neoplasm of skin	neoplasms
Complications of surgical and medical procedures	None
Depression	None
GERD	digestive
Hereditary and idiopathic peripheral neuropathy	neurological
Iron deficiency anemia secondary to blood loss (chronic)	hematopoietic
Localized superficial swelling, mass, or lump	dermatologic
Neoplasm of uncertain behavior	neoplasms
Noninfectious gastroenteritis	digestive
Organic or persistent insomnia	neurological
Osteoarthritis; localized	musculoskeletal
Osteoarthrosis NOS	musculoskeletal
Other disorders of eyelids	sense organs
Other peripheral nerve disorders	neurological
Other symptoms involving urinary system	genitourinary
Shortness of breath	respiratory
Symptoms involving respiratory system and other chest symptoms	respiratory

## Sheet: con_after_hosp
phenotype	phecode_category
Actinic keratosis	dermatologic
Acute pain	neurological
Benign neoplasm of colon	neoplasms
Chronic pain	neurological
Disorder of skin and subcutaneous tissue NOS	dermatologic
Hemangioma of skin and subcutaneous tissue	neoplasms
Injury, NOS	None
Joint/ligament sprain	injuries & poisonings
Neoplasm of uncertain behavior of skin	neoplasms
Orchitis and epididymitis	genitourinary
Osteoarthrosis, localized, primary	musculoskeletal
Other disorders of male genital organs	genitourinary
Other disorders of synovium, tendon, and bursa	musculoskeletal
Other dyschromia	dermatologic
Pain in limb	symptoms
Palpitations	circulatory system
Peripheral enthesopathies and allied syndromes	musculoskeletal
Seborrheic keratosis	dermatologic
Sprains and strains	injuries & poisonings
Synoviopathy	musculoskeletal
Tinnitus	sense organs
