# Supplementary material for: Leveraging Electronic Medical Records from Two Hospital Systems Identifies Male Infertility Associated Comorbidities Across Time
Source: Research Square preprint supplement (doi:10.21203/rs.3.rs-3706493/v1), 2023-12-07
Supplement: Supplementary file 5 [file 69dcb93007bfd700bf6b0b9c.xlsx]

## Sheet: mi_after_primary
phenotype	phecode_category
Abnormal electrocardiogram [ECG] [EKG]	circulatory system
Acquired absence of limb
Atrophic gastritis	digestive
Debility unspecified
E. coli	infectious diseases
Gangrene	symptoms
Glaucoma	sense organs
Gout	endocrine/metabolic
Gouty arthropathy	endocrine/metabolic
Insect bite	injuries & poisonings
Intestinal disaccharidase deficiencies and disaccharide malabsorption	endocrine/metabolic
Kidney replaced by transpant	genitourinary
Nonspecific abnormal findings in stool contents	digestive
Nonspecific abnormal findings on radiological and other examination of skull and head	neurological
Nonspecific findings on examination of blood	symptoms
Orthopnea	respiratory
Other and unspecified disorders of the nervous system	neurological
Other ill-defined and unknown causes of morbidity and mortality
Parkinson's disease	neurological
Peptic ulcer, site unspecified	digestive
Reflux esophagitis	digestive
Septic shock	injuries & poisonings
Tuberculosis	infectious diseases
Type 2 diabetes with ophthalmic manifestations	endocrine/metabolic

## Sheet: mi_after_primary_sdoh
phenotype	phecode_category
Abdominal pain	symptoms
Abnormal findings examination of lungs	respiratory
Abnormal involuntary movements	neurological
Abnormal serum enzyme levels	digestive
Abnormal weight gain	endocrine/metabolic
Acidosis	endocrine/metabolic
Acne	dermatologic
Acquired absence of organs
Acute cystitis	genitourinary
Acute pain	neurological
Acute pancreatitis	digestive
Acute posthemorrhagic anemia	hematopoietic
Acute renal failure	genitourinary
Acute upper respiratory infections of multiple or unspecified sites	respiratory
Adjustment reaction	mental disorders
Adverse drug events and drug allergies	injuries & poisonings
Allergic rhinitis	respiratory
Allergies, other	injuries & poisonings
Anemia in chronic kidney disease	hematopoietic
Anemia in neoplastic disease	hematopoietic
Anemia of chronic disease	hematopoietic
Angina pectoris	circulatory system
Anterior pituitary disorders
Aortic aneurysm	circulatory system
Aortic ectasia	circulatory system
Arthropathy NOS	musculoskeletal
Ascites (non malignant)	digestive
Asphyxia and hypoxemia
Astigmatism	sense organs
Atherosclerosis of aorta	circulatory system
Atopic/contact dermatitis due to other or unspecified	dermatologic
Atrial flutter	circulatory system
Back pain	symptoms
Bariatric surgery	digestive
Benign neoplasm of male genital organs	neoplasms
Blood vessel replaced	circulatory system
Bronchiectasis	respiratory
Cachexia	endocrine/metabolic
Cancer of prostate	neoplasms
Carcinoma in situ of skin	neoplasms
Cardiac arrest	circulatory system
Cardiomegaly	circulatory system
Cataract	sense organs
Cervicalgia	symptoms
Chemotherapy	neoplasms
Chromosomal anomalies	congenital anomalies
Chronic Kidney Disease, Stage III	genitourinary
Chronic Kidney Disease, Stage IV	genitourinary
Chronic kidney disease, Stage I or II	genitourinary
Chronic osteomyelitis	musculoskeletal
Chronic pharyngitis and nasopharyngitis	respiratory
Chronic prostatitis	genitourinary
Chronic renal failure [CKD]	genitourinary
Chronic sinusitis	respiratory
Chronic ulcer of leg or foot	dermatologic
Chronic venous insufficiency [CVI]	circulatory system
Complications of cardiac/vascular device, implant, and graft	injuries & poisonings
Complications of surgical and medical procedures
Complications of transplants and reattached limbs	injuries & poisonings
Congestive heart failure (CHF) NOS	circulatory system
Constipation	digestive
Convulsions	neurological
Cough	respiratory
Cyst of kidney, acquired	genitourinary
Cystic kidney disease	congenital anomalies
Decreased white blood cell count	hematopoietic
Decubitus ulcer	dermatologic
Dependence on respirator [Ventilator] or supplemental oxygen	respiratory
Dermatomycoses	infectious diseases
Dermatophytosis of nail	infectious diseases
Diabetes mellitus	endocrine/metabolic
Diabetes type 2 with peripheral circulatory disorders	endocrine/metabolic
Diabetic retinopathy	endocrine/metabolic
Diarrhea	digestive
Difficulty in walking	musculoskeletal
Disease of tricuspid valve	circulatory system
Diseases of nail, NOS	dermatologic
Disorders involving the immune mechanism	endocrine/metabolic
Disorders of adrenal glands	endocrine/metabolic
Disorders of magnesium metabolism	endocrine/metabolic
Disorders of phosphorus metabolism	endocrine/metabolic
Disorders of vitreous body	sense organs
Dizziness and giddiness (Light-headedness and vertigo)	sense organs
Dry eyes	sense organs
Dyspepsia and other specified disorders of function of stomach	digestive
Dysuria	genitourinary
Edema	symptoms
Effects radiation NOS	injuries & poisonings
Electrolyte imbalance	endocrine/metabolic
Elevated C-reactive protein (CRP)	symptoms
Encephalopathy, not elsewhere classified	neurological
Encounter for long-term (current) use of anticoagulants
End stage renal disease	genitourinary
Epilepsy, recurrent seizures, convulsions	neurological
Epistaxis or throat hemorrhage	respiratory
Erectile dysfunction [ED]	genitourinary
Fever of unknown origin	symptoms
Flatulence	digestive
Fluid overload	endocrine/metabolic
Frequency of urination and polyuria	genitourinary
Functional disorders of bladder	genitourinary
GERD	digestive
Gram negative septicemia	infectious diseases
Heart failure with preserved EF [Diastolic heart failure]	circulatory system
Heart failure with reduced EF [Systolic or combined heart failure]	circulatory system
Heart valve replaced	circulatory system
Hereditary and idiopathic peripheral neuropathy	neurological
Hyperlipidemia	endocrine/metabolic
Hyperparathyroidism	endocrine/metabolic
Hyperplasia of prostate	genitourinary
Hyperpotassemia	endocrine/metabolic
Hypertensive chronic kidney disease	circulatory system
Hypertensive heart and/or renal disease	circulatory system
Hypertensive heart disease	circulatory system
Hypertrophy of breast (Gynecomastia)	genitourinary
Hypoglycemia	endocrine/metabolic
Hypopotassemia	endocrine/metabolic
Hyposmolality and/or hyponatremia	endocrine/metabolic
Hypotension NOS	circulatory system
Hypothyroidism NOS	endocrine/metabolic
Hypovolemia	endocrine/metabolic
Immunity deficiency	endocrine/metabolic
Impacted cerumen	sense organs
Infestation (lice, mites)	infectious diseases
Inflammatory and toxic neuropathy	neurological
Iron deficiency anemias, unspecified or not due to blood loss	hematopoietic
Irritable Bowel Syndrome	digestive
Lipoma	neoplasms
Lymphadenitis	hematopoietic
Malaise and fatigue	symptoms
Mastodynia	genitourinary
Mechanical complication of unspecified genitourinary device, implant, and graft	injuries & poisonings
Memory loss	mental disorders
Microscopic hematuria	genitourinary
Migraine	neurological
Morbid obesity	endocrine/metabolic
Myocardial infarction	circulatory system
Nasal polyps	respiratory
Nausea and vomiting	symptoms
Nephrotic syndrome without mention of glomerulonephritis	genitourinary
Neuralgia, neuritis, and radiculitis NOS	symptoms
Nonrheumatic aortic valve disorders	circulatory system
Nonrheumatic mitral valve disorders	circulatory system
Nonspecific chest pain	circulatory system
Nonspecific elevation of levels of transaminase or lactic acid dehydrogenase [LDH]	digestive
Nontoxic uninodular goiter	endocrine/metabolic
Obesity	endocrine/metabolic
Open wounds of head; neck; and trunk	injuries & poisonings
Osteopenia or other disorder of bone and cartilage	musculoskeletal
Other abnormal blood chemistry	symptoms
Other abnormal glucose	endocrine/metabolic
Other abnormality of urination	genitourinary
Other acute and subacute forms of ischemic heart disease	circulatory system
Other and unspecified coagulation defects	hematopoietic
Other anemias	hematopoietic
Other chronic ischemic heart disease, unspecified	circulatory system
Other chronic nonalcoholic liver disease	digestive
Other diseases of lung	respiratory
Other disorders of arteries and arterioles	circulatory system
Other disorders of bone and cartilage	musculoskeletal
Other disorders of liver	digestive
Other disorders of stomach and duodenum	digestive
Other disorders of thyroid	endocrine/metabolic
Other dyspnea	respiratory
Other endocrine disorders	endocrine/metabolic
Other headache syndromes	neurological
Other hypertensive complications	circulatory system
Other local infections of skin and subcutaneous tissue	dermatologic
Other nutritional deficiency	endocrine/metabolic
Other pulmonary inflamation or edema	respiratory
Other specified cardiac dysrhythmias	circulatory system
Other specified erythematous conditions	dermatologic
Other symptoms
Other symptoms involving urinary system	genitourinary
Other symptoms/disorders or the urinary system	genitourinary
Other upper respiratory disease	respiratory
Other venous embolism and thrombosis	circulatory system
Pain in joint	musculoskeletal
Palpitations	circulatory system
Paroxysmal supraventricular tachycardia	circulatory system
Paroxysmal tachycardia, unspecified	circulatory system
Paroxysmal ventricular tachycardia	circulatory system
Peripheral vascular disease, unspecified	circulatory system
Personal history of diseases of digestive system	digestive
Persons with potential health hazards related to socioeconomic, psychosocial, and other circumstances
Pituitary hyperfunction	endocrine/metabolic
Pituitary hypofunction	endocrine/metabolic
Pleurisy; pleural effusion	respiratory
Pneumonia	respiratory
Pneumonitis due to inhalation of food or vomitus	respiratory
Poisoning by other anti-infectives	injuries & poisonings
Postnasal drip	respiratory
Posttraumatic stress disorder	mental disorders
Proteinuria	endocrine/metabolic
Pruritus and related conditions	dermatologic
Pulmonary collapse; interstitial and compensatory emphysema	respiratory
Pulmonary congestion and hypostasis	respiratory
Pulmonary heart disease	circulatory system
Pyelonephritis	genitourinary
Rash and other nonspecific skin eruption	dermatologic
Renal dialysis	genitourinary
Respiratory failure	respiratory
Second degree AV block	circulatory system
Secondary diabetes mellitus	endocrine/metabolic
Secondary hyperparathyroidism (of renal origin)	genitourinary
Secondary malignancy of bone	neoplasms
Secondary malignant neoplasm	neoplasms
Secondary thrombocytopenia	hematopoietic
Senile cataract	sense organs
Sensorineural hearing loss	sense organs
Sepsis	injuries & poisonings
Septicemia	infectious diseases
Shock	symptoms
Shortness of breath	respiratory
Simple and unspecified goiter	endocrine/metabolic
Solitary pulmonary nodule	respiratory
Squamous cell carcinoma	neoplasms
Supraventricular premature beats	circulatory system
Symptoms affecting skin	dermatologic
Symptoms concerning nutrition, metabolism, and development
Symptoms involving cardiovascular system	circulatory system
Symptoms involving head and neck	mental disorders
Tachycardia NOS	circulatory system
Thrombocytopenia	hematopoietic
Tobacco use disorder	mental disorders
Type 2 diabetes	endocrine/metabolic
Type 2 diabetes with neurological manifestations	endocrine/metabolic
Type 2 diabetes with renal manifestations	endocrine/metabolic
Urinary obstruction	genitourinary
Urinary tract infection	genitourinary
Urticaria	dermatologic
Varicose veins	circulatory system
Varicose veins of lower extremity	circulatory system
Varicose veins of lower extremity, symptomtic	circulatory system
Viral hepatitis C	infectious diseases
Viral pneumonia	respiratory
Vitamin D deficiency	endocrine/metabolic
potential health hazards related to communicable diseases potential health hazards related to communicable diseases
screening for other diseases and disorders
severe protein-calorie malnutrition	endocrine/metabolic

## Sheet: mi_after_primary_sdoh_hosp
phenotype	phecode_category
Abnormal spermatozoa	genitourinary
Arrhythmia (cardiac) NOS	circulatory system
Bacterial enteritis	infectious diseases
Circulatory disease NEC	circulatory system
H. pylori	infectious diseases
Osteoporosis NOS	musculoskeletal
Other disorders of metabolism	endocrine/metabolic
Other disorders of testis	genitourinary
Other disorders of the kidney and ureters	genitourinary
Other forms of chronic heart disease	circulatory system
Other tests
Persons encountering health services in circumstances related to reproduction
Testicular hypofunction	endocrine/metabolic

## Sheet: mi_after_sdoh
phenotype	phecode_category
Abnormality of gait	neurological
Adverse effects of antibacterials (not penicillins)	injuries & poisonings
Alcoholism	mental disorders
Asthma	respiratory
Benign neoplasm of skin	neoplasms
Cardiac pacemaker in situ	circulatory system
Disorder of skin and subcutaneous tissue NOS	dermatologic
Dysmetabolic syndrome X	endocrine/metabolic
Hearing loss	sense organs
Melanomas of skin, dx or hx	neoplasms
Noninfectious gastroenteritis	digestive
Other hypertrophic and atrophic conditions of skin	dermatologic
Pathologic fracture	musculoskeletal
Seborrheic dermatitis	dermatologic
Septal Deviations/Turbinate Hypertrophy	respiratory
Sprains and strains	injuries & poisonings
Toxic gastroenteritis and colitis	digestive
Visual disturbances	sense organs

## Sheet: con_after_hosp
phenotype	phecode_category
Benign neoplasm of colon	neoplasms
Degeneration of intervertebral disc	musculoskeletal
Disturbance of skin sensation	dermatologic
Elevated blood pressure reading without diagnosis of hypertension	circulatory system
Enthesopathy	musculoskeletal
Family history
Hemangioma of skin and subcutaneous tissue	neoplasms
Hemorrhoids	circulatory system
Insomnia	neurological
Localized superficial swelling, mass, or lump	dermatologic
Organic or persistent insomnia	neurological
Other disorders of soft tissues	musculoskeletal
Peripheral enthesopathies and allied syndromes	musculoskeletal
Swelling of limb	symptoms
screening for infectious and parasitic diseases
screening for malignant neoplasms

## Sheet: con_after_primary_hosp
phenotype	phecode_category
Actinic keratosis	dermatologic
Other disorders of male genital organs	genitourinary
Screening for malignant neoplasms of the skin

## Sheet: con_after_primary_sdoh_hosp
phenotype	phecode_category
Contact dermatitis and other eczema due to plants [except food]	dermatologic
Orchitis and epididymitis	genitourinary
