# Supplementary material for: Leveraging Electronic Medical Records from Two Hospital Systems Identifies Male Infertility Associated Comorbidities Across Time
Source: Research Square preprint supplement (doi:10.21203/rs.3.rs-3706493/v1), 2023-12-07
Supplement: Supplementary file 6 [file 6d4397025e9e741e66434806.xlsx]

## Sheet: age_axis1
age_category	30 - 39	40 - 49	50 - 59	60 - 69	70 - 79	< 30	>= 80
30 - 39	1	0.0420772	0.0657079	0.220091	1	1	1
40 - 49	0.0420772	1	1	1	0.0157801	0.0420772	0.0420772
50 - 59	0.0657079	1	1	1	0.026262	0.0657079	0.0657079
60 - 69	0.220091	1	1	1	0.108441	0.220091	0.220091
70 - 79	1	0.0157801	0.026262	0.108441	1	1	1
< 30	1	0.0420772	0.0657079	0.220091	1	1	1
>= 80	1	0.0420772	0.0657079	0.220091	1	1	1

## Sheet: age_axis2
age_category	30 - 39	40 - 49	50 - 59	60 - 69	70 - 79	< 30	>= 80
30 - 39	1	1	1	1	1	1	1
40 - 49	1	1	1	0.308363	0.00310116	1	1
50 - 59	1	1	1	1	0.00777474	1	1
60 - 69	1	0.308363	1	1	0.260345	1	1
70 - 79	1	0.00310116	0.00777474	0.260345	1	1	1
< 30	1	1	1	1	1	1	1
>= 80	1	1	1	1	1	1	1

## Sheet: race_axis1
identified_race	American Indian or Alaska Native	Asian	Black or African American	Native Hawaiian or Other Pacific Islander	No matching concept	White
American Indian or Alaska Native	1	1	1	1	1	1
Asian	1	1	0.164502	1	3.93297e-15	6.4686e-23
Black or African American	1	0.164502	1	1	1	1
Native Hawaiian or Other Pacific Islander	1	1	1	1	1	1
No matching concept	1	3.93297e-15	1	1	1	1
White	1	6.4686e-23	1	1	1	1

## Sheet: race_axis2
identified_race	American Indian or Alaska Native	Asian	Black or African American	Native Hawaiian or Other Pacific Islander	No matching concept	White
American Indian or Alaska Native	1	1	1	1	1	1
Asian	1	1	1	1	1	0.000160215
Black or African American	1	1	1	1	1	1
Native Hawaiian or Other Pacific Islander	1	1	1	1	1	1
No matching concept	1	1	1	1	1	0.173086
White	1	0.000160215	1	1	0.173086	1

## Sheet: ethnicity_axis1
identified_ethnicity	Hispanic or Latino	No matching concept	Not Hispanic or Latino
Hispanic or Latino	1	0.000128466	1
No matching concept	0.000128466	1	1.01049e-08
Not Hispanic or Latino	1	1.01049e-08	1

## Sheet: ethnicity_axis2
identified_ethnicity	Hispanic or Latino	No matching concept	Not Hispanic or Latino
Hispanic or Latino	1	1	0.0893307
No matching concept	1	1	0.0301171
Not Hispanic or Latino	0.0893307	0.0301171	1

## Sheet: visits_before_axis1
quintile	1 (0-6 visits)	2 (7-12 visits)	3 (13-21 visits)	4 (22-43 visits)	5 (44-1200 visits)
1 (0-6 visits)	1	4.67261e-20	4.80913e-45	2.84185e-89	8.01009e-90
2 (7-12 visits)	4.67261e-20	1	9.39682e-06	4.71712e-26	1.55829e-26
3 (13-21 visits)	4.80913e-45	9.39682e-06	1	6.52165e-08	3.14046e-08
4 (22-43 visits)	2.84185e-89	4.71712e-26	6.52165e-08	1	1
5 (44-1200 visits)	8.01009e-90	1.55829e-26	3.14046e-08	1	1

## Sheet: visits_before_axis2
quintile	1 (0-6 visits)	2 (7-12 visits)	3 (13-21 visits)	4 (22-43 visits)	5 (44-1200 visits)
1 (0-6 visits)	1	0.280833	0.0234913	9.09377e-07	1.25665e-36
2 (7-12 visits)	0.280833	1	1	0.0159638	2.04048e-25
3 (13-21 visits)	0.0234913	1	1	0.231512	3.27821e-21
4 (22-43 visits)	9.09377e-07	0.0159638	0.231512	1	9.13949e-13
5 (44-1200 visits)	1.25665e-36	2.04048e-25	3.27821e-21	9.13949e-13	1

## Sheet: visits_after_axis1
quintile	1 (0-8 visits)	2 (9-18 visits)	3 (19-34 visits)	4 (35-73 visits)	5 (74-1446 visits)
1 (0-8 visits)	1	1	0.177149	2.38811e-08	7.33378e-27
2 (9-18 visits)	1	1	1	6.76695e-05	3.22667e-20
3 (19-34 visits)	0.177149	1	1	0.00461907	6.18597e-16
4 (35-73 visits)	2.38811e-08	6.76695e-05	0.00461907	1	1.00638e-05
5 (74-1446 visits)	7.33378e-27	3.22667e-20	6.18597e-16	1.00638e-05	1

## Sheet: visits_after_axis2
quintile	1 (0-8 visits)	2 (9-18 visits)	3 (19-34 visits)	4 (35-73 visits)	5 (74-1446 visits)
1 (0-8 visits)	1	1	1	2.64298e-05	2.21577e-17
2 (9-18 visits)	1	1	1	5.44432e-06	1.44921e-18
3 (19-34 visits)	1	1	1	0.000447509	8.7944e-15
4 (35-73 visits)	2.64298e-05	5.44432e-06	0.000447509	1	0.000680961
5 (74-1446 visits)	2.21577e-17	1.44921e-18	8.7944e-15	0.000680961	1

[truncated: 4 more sheets: mths_EMR_before_axis1, mths_EMR_before_axis2, mths_EMR_after_axis1, mths_EMR_after_axis2]
