# Supplementary material for: Leveraging Electronic Medical Records from Two Hospital Systems Identifies Male Infertility Associated Comorbidities Across Time
Source: Research Square preprint supplement (doi:10.21203/rs.3.rs-3706493/v1), 2023-12-07
Supplement: Supplementary file 9 [file 91178afa12acbce48e8e96f9.xlsx]

## Sheet: mi_b4_vs_aft_aft
phenotype	phecode_category
Abdominal pain	symptoms
Abnormal electrocardiogram [ECG] [EKG]	circulatory system
Abnormal involuntary movements	neurological
Abnormal serum enzyme levels	digestive
Abnormal weight gain	endocrine/metabolic
Acne	dermatologic
Acquired absence of limb
Acute cystitis	genitourinary
Acute pain	neurological
Acute pancreatitis	digestive
Acute posthemorrhagic anemia	hematopoietic
Acute upper respiratory infections of multiple or unspecified sites	respiratory
Adjustment reaction	mental disorders
Allergic rhinitis	respiratory
Allergies, other	injuries & poisonings
Anemia in neoplastic disease	hematopoietic
Angina pectoris	circulatory system
Aortic aneurysm	circulatory system
Aortic ectasia	circulatory system
Arrhythmia (cardiac) NOS	circulatory system
Arthropathy NOS	musculoskeletal
Astigmatism	sense organs
Atherosclerosis of aorta	circulatory system
Atopic/contact dermatitis due to other or unspecified	dermatologic
Atrial flutter	circulatory system
Atrophic gastritis	digestive
Back pain	symptoms
Bacterial enteritis	infectious diseases
Bariatric surgery	digestive
Benign neoplasm of male genital organs	neoplasms
Carcinoma in situ of skin	neoplasms
Cardiac arrest	circulatory system
Cardiomegaly	circulatory system
Cervicalgia	symptoms
Chronic kidney disease, Stage I or II	genitourinary
Chronic osteomyelitis	musculoskeletal
Chronic pharyngitis and nasopharyngitis	respiratory
Chronic prostatitis	genitourinary
Chronic sinusitis	respiratory
Convulsions	neurological
Cough	respiratory
Cyst of kidney, acquired	genitourinary
Debility unspecified
Decreased white blood cell count	hematopoietic
Dermatomycoses	infectious diseases
Dermatophytosis of nail	infectious diseases
Diabetes mellitus	endocrine/metabolic
Diarrhea	digestive
Difficulty in walking	musculoskeletal
Diseases of nail, NOS	dermatologic
Disorders of adrenal glands	endocrine/metabolic
Disorders of vitreous body	sense organs
Dizziness and giddiness (Light-headedness and vertigo)	sense organs
Dry eyes	sense organs
Dyspepsia and other specified disorders of function of stomach	digestive
Edema	symptoms
Electrolyte imbalance	endocrine/metabolic
Elevated C-reactive protein (CRP)	symptoms
Encephalopathy, not elsewhere classified	neurological
Encounter for long-term (current) use of anticoagulants
Epilepsy, recurrent seizures, convulsions	neurological
Epistaxis or throat hemorrhage	respiratory
Fever of unknown origin	symptoms
GERD	digestive
Glaucoma	sense organs
Gout	endocrine/metabolic
Gouty arthropathy	endocrine/metabolic
H. pylori	infectious diseases
Heart valve replaced	circulatory system
Hereditary and idiopathic peripheral neuropathy	neurological
Hyperlipidemia	endocrine/metabolic
Hypertensive heart disease	circulatory system
Impacted cerumen	sense organs
Infestation (lice, mites)	infectious diseases
Insect bite	injuries & poisonings
Intestinal disaccharidase deficiencies and disaccharide malabsorption	endocrine/metabolic
Irritable Bowel Syndrome	digestive
Lipoma	neoplasms
Malaise and fatigue	symptoms
Mastodynia	genitourinary
Mechanical complication of unspecified genitourinary device, implant, and graft	injuries & poisonings
Memory loss	mental disorders
Microscopic hematuria	genitourinary
Migraine	neurological
Nasal polyps	respiratory
Nausea and vomiting	symptoms
Nephrotic syndrome without mention of glomerulonephritis	genitourinary
Neuralgia, neuritis, and radiculitis NOS	symptoms
Nonrheumatic mitral valve disorders	circulatory system
Nonspecific abnormal findings in stool contents	digestive
Nonspecific abnormal findings on radiological and other examination of skull and head	neurological
Nonspecific chest pain	circulatory system
Nonspecific elevation of levels of transaminase or lactic acid dehydrogenase [LDH]	digestive
Nonspecific findings on examination of blood	symptoms
Nontoxic uninodular goiter	endocrine/metabolic
Obesity	endocrine/metabolic
Open wounds of head; neck; and trunk	injuries & poisonings
Osteopenia or other disorder of bone and cartilage	musculoskeletal
Other abnormal glucose	endocrine/metabolic
Other acute and subacute forms of ischemic heart disease	circulatory system
Other and unspecified coagulation defects	hematopoietic
Other and unspecified disorders of the nervous system	neurological
Other chronic ischemic heart disease, unspecified	circulatory system
Other chronic nonalcoholic liver disease	digestive
Other disorders of bone and cartilage	musculoskeletal
Other disorders of liver	digestive
Other disorders of metabolism	endocrine/metabolic
Other disorders of thyroid	endocrine/metabolic
Other dyspnea	respiratory
Other forms of chronic heart disease	circulatory system
Other headache syndromes	neurological
Other ill-defined and unknown causes of morbidity and mortality
Other local infections of skin and subcutaneous tissue	dermatologic
Other specified cardiac dysrhythmias	circulatory system
Other specified erythematous conditions	dermatologic
Other symptoms
Other symptoms involving urinary system	genitourinary
Other symptoms/disorders or the urinary system	genitourinary
Other tests
Other upper respiratory disease	respiratory
Pain in joint	musculoskeletal
Palpitations	circulatory system
Parkinson's disease	neurological
Paroxysmal supraventricular tachycardia	circulatory system
Paroxysmal tachycardia, unspecified	circulatory system
Paroxysmal ventricular tachycardia	circulatory system
Peptic ulcer, site unspecified	digestive
Peripheral vascular disease, unspecified	circulatory system
Personal history of diseases of digestive system	digestive
Persons encountering health services in circumstances related to reproduction
Persons with potential health hazards related to socioeconomic, psychosocial, and other circumstances
Pneumonia	respiratory
Pneumonitis due to inhalation of food or vomitus	respiratory
Poisoning by other anti-infectives	injuries & poisonings
Postnasal drip	respiratory
Posttraumatic stress disorder	mental disorders
Pruritus and related conditions	dermatologic
Pulmonary heart disease	circulatory system
Rash and other nonspecific skin eruption	dermatologic
Reflux esophagitis	digestive
Second degree AV block	circulatory system
Sensorineural hearing loss	sense organs
Septic shock	injuries & poisonings
Shortness of breath	respiratory
Simple and unspecified goiter	endocrine/metabolic
Squamous cell carcinoma	neoplasms
Supraventricular premature beats	circulatory system
Symptoms affecting skin	dermatologic
Symptoms concerning nutrition, metabolism, and development
Symptoms involving cardiovascular system	circulatory system
Symptoms involving head and neck	mental disorders
Tachycardia NOS	circulatory system
Tobacco use disorder	mental disorders
Tuberculosis	infectious diseases
Urinary obstruction	genitourinary
Urticaria	dermatologic
Varicose veins of lower extremity	circulatory system
Varicose veins of lower extremity, symptomtic	circulatory system
potential health hazards related to communicable diseases potential health hazards related to communicable diseases
screening for other diseases and disorders

## Sheet: mi_b4_vs_aft_b4
phenotype	phecode_category
Abnormal coagulation profile	hematopoietic
Adult failure to thrive	endocrine/metabolic
Adverse effects of antibacterials (not penicillins)	injuries & poisonings
Alkalosis	endocrine/metabolic
Altered mental status	mental disorders
Antineoplastic and immunosuppressive drugs causing adverse effects	injuries & poisonings
Bacteremia	infectious diseases
Benign neoplasm of pituitary gland and craniopharyngeal duct (pouch)	neoplasms
Bone marrow or stem cell transplant	neoplasms
Cancer of brain	neoplasms
Cancer of connective tissue	neoplasms
Cancer, suspected or other	neoplasms
Cerebral artery occlusion, with cerebral infarction	circulatory system
Cerebral edema and compression of brain	neurological
Chronic pulmonary heart disease	circulatory system
Cirrhosis of liver without mention of alcohol	digestive
Coma	neurological
Complication due to other implant and internal device	injuries & poisonings
Congenital anomalies of genital organs	congenital anomalies
Congenital anomalies of male genital organs	congenital anomalies
Coronary atherosclerosis	circulatory system
Cystic fibrosis	respiratory
Decreased libido	mental disorders
Deep vein thrombosis [DVT]	circulatory system
Degenerative disease of the spinal cord	neurological
Diseases of pancreas	digestive
Disorders of the pituitary gland and its hypothalamic control	endocrine/metabolic
Elevated prostate specific antigen [PSA]	genitourinary
Elevated white blood cell count	hematopoietic
Essential hypertension	circulatory system
Functional digestive disorders	digestive
Glucocorticoid deficiency	endocrine/metabolic
Gram positive septicemia	infectious diseases
Hodgkin's disease	neoplasms
Hormones and synthetic substitutes causing adverse effects in therapeutic use	injuries & poisonings
Hyperestrogenism	endocrine/metabolic
Hyperosmolality and/or hypernatremia	endocrine/metabolic
Hypocalcemia	endocrine/metabolic
Infection with drug-resistant microorganisms	infectious diseases
Injuries to the nervous system	injuries & poisonings
Insulin pump user	endocrine/metabolic
Iron deficiency anemia secondary to blood loss (chronic)	hematopoietic
Late effects of cerebrovascular disease	circulatory system
Leukemia	neoplasms
Lung disease due to external agents	respiratory
Lymphoid leukemia, acute	neoplasms
Malignant neoplasm of liver, primary	neoplasms
Malignant neoplasm of testis	neoplasms
Malignant neoplasm, other	neoplasms
Manlignant and unknown neoplasms of brain and nervous system	neoplasms
Methicillin sensitive Staphylococcus aureus	infectious diseases
Multiple myeloma	neoplasms
Nephritis and nephropathy with pathological lesion	genitourinary
Neutropenia	hematopoietic
Opiates and related narcotics causing adverse effects in therapeutic use	injuries & poisonings
Osteoarthritis; localized	musculoskeletal
Other and unspecified congenital anomalies	congenital anomalies
Other diseases of blood and blood-forming organs	hematopoietic
Other disorders of biliary tract	digestive
Other disorders of bladder	genitourinary
Other infectious and parasitic diseases	infectious diseases
Other paralytic syndromes	neurological
Other specified disorders of plasma protein metabolism	endocrine/metabolic
Pancytopenia	hematopoietic
Peritonitis and retroperitoneal infections	digestive
Polycythemia vera	neoplasms
Polycythemia, secondary	hematopoietic
Prostatitis	genitourinary
Protein-calorie malnutrition	endocrine/metabolic
Renal failure NOS	genitourinary
Retention of urine	genitourinary
Secondary malignancy of lymph nodes	neoplasms
Secondary malignancy of respiratory organs	neoplasms
Secondary/extrinsic cardiomyopathies	circulatory system
Sexual and gender identity disorders	mental disorders
Spinal cord injury without evidence of spinal bone injury	injuries & poisonings
Streptococcus infection	infectious diseases
Stricture/obstruction of ureter	genitourinary
Substance addiction and disorders	mental disorders
Transient cerebral ischemia	circulatory system
Urethral stricture (not specified as infectious)	genitourinary
Urinary incontinence	genitourinary
Viral hepatitis B	infectious diseases
Vitamin B-complex deficiencies	endocrine/metabolic
screening for infectious and parasitic diseases

## Sheet: mi_b4_vs_aft_b4_aft
phenotype	phecode_category
Abnormal findings examination of lungs	respiratory
Abnormal spermatozoa	genitourinary
Acidosis	endocrine/metabolic
Acquired absence of organs
Acute renal failure	genitourinary
Adverse drug events and drug allergies	injuries & poisonings
Anemia in chronic kidney disease	hematopoietic
Anemia of chronic disease	hematopoietic
Anterior pituitary disorders
Ascites (non malignant)	digestive
Asphyxia and hypoxemia
Blood vessel replaced	circulatory system
Bronchiectasis	respiratory
Cachexia	endocrine/metabolic
Cancer of prostate	neoplasms
Cataract	sense organs
Chemotherapy	neoplasms
Chromosomal anomalies	congenital anomalies
Chronic Kidney Disease, Stage III	genitourinary
Chronic Kidney Disease, Stage IV	genitourinary
Chronic renal failure [CKD]	genitourinary
Chronic ulcer of leg or foot	dermatologic
Chronic venous insufficiency [CVI]	circulatory system
Circulatory disease NEC	circulatory system
Complications of cardiac/vascular device, implant, and graft	injuries & poisonings
Complications of surgical and medical procedures
Complications of transplants and reattached limbs	injuries & poisonings
Congestive heart failure (CHF) NOS	circulatory system
Constipation	digestive
Cystic kidney disease	congenital anomalies
Decubitus ulcer	dermatologic
Dependence on respirator [Ventilator] or supplemental oxygen	respiratory
Diabetes type 2 with peripheral circulatory disorders	endocrine/metabolic
Diabetic retinopathy	endocrine/metabolic
Disease of tricuspid valve	circulatory system
Disorders involving the immune mechanism	endocrine/metabolic
Disorders of magnesium metabolism	endocrine/metabolic
Disorders of phosphorus metabolism	endocrine/metabolic
Dysuria	genitourinary
E. coli	infectious diseases
Effects radiation NOS	injuries & poisonings
End stage renal disease	genitourinary
Erectile dysfunction [ED]	genitourinary
Flatulence	digestive
Fluid overload	endocrine/metabolic
Frequency of urination and polyuria	genitourinary
Functional disorders of bladder	genitourinary
Gram negative septicemia	infectious diseases
Heart failure with preserved EF [Diastolic heart failure]	circulatory system
Heart failure with reduced EF [Systolic or combined heart failure]	circulatory system
Hyperparathyroidism	endocrine/metabolic
Hyperplasia of prostate	genitourinary
Hyperpotassemia	endocrine/metabolic
Hypertensive chronic kidney disease	circulatory system
Hypertensive heart and/or renal disease	circulatory system
Hypertrophy of breast (Gynecomastia)	genitourinary
Hypoglycemia	endocrine/metabolic
Hypopotassemia	endocrine/metabolic
Hyposmolality and/or hyponatremia	endocrine/metabolic
Hypotension NOS	circulatory system
Hypothyroidism NOS	endocrine/metabolic
Hypovolemia	endocrine/metabolic
Immunity deficiency	endocrine/metabolic
Inflammatory and toxic neuropathy	neurological
Iron deficiency anemias, unspecified or not due to blood loss	hematopoietic
Kidney replaced by transpant	genitourinary
Lymphadenitis	hematopoietic
Morbid obesity	endocrine/metabolic
Myocardial infarction	circulatory system
Nonrheumatic aortic valve disorders	circulatory system
Orthopnea	respiratory
Osteoporosis NOS	musculoskeletal
Other abnormal blood chemistry	symptoms
Other abnormality of urination	genitourinary
Other anemias	hematopoietic
Other diseases of lung	respiratory
Other disorders of arteries and arterioles	circulatory system
Other disorders of stomach and duodenum	digestive
Other disorders of testis	genitourinary
Other disorders of the kidney and ureters	genitourinary
Other endocrine disorders	endocrine/metabolic
Other hypertensive complications	circulatory system
Other nutritional deficiency	endocrine/metabolic
Other pulmonary inflamation or edema	respiratory
Other venous embolism and thrombosis	circulatory system
Pituitary hyperfunction	endocrine/metabolic
Pituitary hypofunction	endocrine/metabolic
Pleurisy; pleural effusion	respiratory
Proteinuria	endocrine/metabolic
Pulmonary collapse; interstitial and compensatory emphysema	respiratory
Pulmonary congestion and hypostasis	respiratory
Pyelonephritis	genitourinary
Renal dialysis	genitourinary
Respiratory failure	respiratory
Secondary diabetes mellitus	endocrine/metabolic
Secondary hyperparathyroidism (of renal origin)	genitourinary
Secondary malignancy of bone	neoplasms
Secondary malignant neoplasm	neoplasms
Secondary thrombocytopenia	hematopoietic
Senile cataract	sense organs
Sepsis	injuries & poisonings
Septicemia	infectious diseases
Shock	symptoms
Solitary pulmonary nodule	respiratory
Testicular hypofunction	endocrine/metabolic
Thrombocytopenia	hematopoietic
Type 2 diabetes	endocrine/metabolic
Type 2 diabetes with neurological manifestations	endocrine/metabolic
Type 2 diabetes with ophthalmic manifestations	endocrine/metabolic
Type 2 diabetes with renal manifestations	endocrine/metabolic
Urinary tract infection	genitourinary
Varicose veins	circulatory system
Viral hepatitis C	infectious diseases
Vitamin D deficiency	endocrine/metabolic
severe protein-calorie malnutrition	endocrine/metabolic
