# Supplementary material for: Leveraging Electronic Medical Records from Two Hospital Systems Identifies Male Infertility Associated Comorbidities Across Time
Source: Research Square preprint supplement (doi:10.21203/rs.3.rs-3706493/v1), 2023-12-07
Supplement: Supplementary file 10 [file b5a09a26f495084fb2ea5828.xlsx]

## Sheet: before_primary
phenotype	phecode_category	coef_has_phenotype	ci_lb_has_phenotype	ci_ub_has_phenotype	std err_has_phenotype	z_has_phenotype	odds_ratio_has_phenotype	ci_lb_or_has_phenotype	ci_ub_or_has_phenotype	Count_mi	Count_r_mi	Count_con	Count_r_con	pval_has_phenotype	pval_BH_adj_has_phenotype	significance_bh	log10_OR_has_phenotype	-log10_pval_has_phenotype	coef_Intercept	ci_lb_Intercept	ci_ub_Intercept	std err_Intercept	z_Intercept	pval_Intercept	coef_mi_or_vas_est_age	ci_lb_mi_or_vas_est_age	ci_ub_mi_or_vas_est_age	std err_mi_or_vas_est_age	z_mi_or_vas_est_age	pval_mi_or_vas_est_age	coef_location_source_value[T.1]	ci_lb_location_source_value[T.1]	ci_ub_location_source_value[T.1]	std err_location_source_value[T.1]	z_location_source_value[T.1]	pval_location_source_value[T.1]	coef_location_source_value[T.2]	ci_lb_location_source_value[T.2]	ci_ub_location_source_value[T.2]	std err_location_source_value[T.2]	z_location_source_value[T.2]	pval_location_source_value[T.2]	coef_location_source_value[T.4]	ci_lb_location_source_value[T.4]	ci_ub_location_source_value[T.4]	std err_location_source_value[T.4]	z_location_source_value[T.4]	pval_location_source_value[T.4]	coef_location_source_value[T.5]
Abdominal hernia	digestive	0.2319	-0.528	0.992	0.388	0.598	1.26099	0.589783	2.69662	12	6519	19	8334	0.54981	0.766756	not_significant	0.100713	0.259788	1.434	1.235	1.633	0.101	14.154	0	-0.0499	-0.055	-0.045	0.002	-20.561	0	0.4435	0.307	0.58	0.07	6.356	0	0.2907	0.178	0.403	0.057	5.076	0	1.1265	1.02	1.233	0.054	20.707	0	-0.1529
Abdominal pain	symptoms	-0.0603	-0.169	0.049	0.056	-1.085	0.941482	0.844509	1.05022	646	5885	1047	7306	0.278004	0.517267	not_significant	-0.026188	0.555949	1.4364	1.238	1.635	0.101	14.171	0	-0.0497	-0.054	-0.045	0.002	-20.469	0	0.4381	0.301	0.575	0.07	6.268	0	0.2878	0.175	0.4	0.057	5.021	0	1.121	1.014	1.228	0.055	20.544	0	-0.154
Abnormal arterial blood gases	symptoms	-0.3747	-2.355	1.605	1.01	-0.371	0.687495	0.0948935	4.97786	10	6521	10	8343	0.710725	0.869266	not_significant	-0.16273	0.148299	1.4332	1.235	1.632	0.101	14.148	0	-0.0498	-0.055	-0.045	0.002	-20.554	0	0.4426	0.306	0.579	0.07	6.345	0	0.2901	0.178	0.402	0.057	5.065	0	1.1259	1.019	1.233	0.054	20.7	0	-0.1534
Abnormal chest sounds		0.2198	-0.822	1.261	0.531	0.414	1.24583	0.439552	3.52895	10	6521	10	8343	0.679162	0.852993	not_significant	0.0954579	0.168027	1.4326	1.234	1.631	0.101	14.142	0	-0.0498	-0.055	-0.045	0.002	-20.552	0	0.443	0.306	0.58	0.07	6.35	0	0.2903	0.178	0.403	0.057	5.069	0	1.126	1.019	1.233	0.054	20.701	0	-0.1535
Abnormal coagulation profile	hematopoietic	1.4321	0.632	2.232	0.408	3.509	4.18748	1.88137	9.31848	24	6507	10	8343	0.00044963	0.00442329	mi_significant	0.621953	3.34714	1.4386	1.24	1.637	0.101	14.191	0	-0.05	-0.055	-0.045	0.002	-20.61	0	0.4404	0.304	0.577	0.07	6.309	0	0.2846	0.172	0.397	0.057	4.965	0	1.1261	1.019	1.233	0.054	20.699	0	-0.1536
Abnormal electrocardiogram [ECG] [EKG]	circulatory system	-0.2097	-0.531	0.112	0.164	-1.278	0.810827	0.588017	1.11851	61	6470	124	8229	0.20122	0.435675	not_significant	-0.0910716	0.696329	1.4313	1.233	1.63	0.101	14.128	0	-0.0497	-0.054	-0.045	0.002	-20.487	0	0.4408	0.304	0.578	0.07	6.317	0	0.2889	0.177	0.401	0.057	5.043	0	1.1244	1.018	1.231	0.054	20.667	0	-0.1534
Abnormal findings examination of lungs	respiratory	0.3792	0.13	0.628	0.127	2.985	1.46112	1.13883	1.87386	133	6398	153	8200	0.00283926	0.0202588	mi_significant	0.164684	2.5468	1.4393	1.241	1.638	0.101	14.208	0	-0.0502	-0.055	-0.045	0.002	-20.68	0	0.4444	0.308	0.581	0.07	6.368	0	0.2906	0.178	0.403	0.057	5.073	0	1.1293	1.023	1.236	0.054	20.751	0	-0.1542
Abnormal findings on exam of gastrointestinal tract/ abdominal area	digestive	0.4769	-0.054	1.008	0.271	1.759	1.61107	0.947432	2.74012	29	6502	33	8320	0.0785089	0.243987	not_significant	0.207115	1.10508	1.4353	1.237	1.634	0.101	14.166	0	-0.05	-0.055	-0.045	0.002	-20.598	0	0.445	0.308	0.582	0.07	6.377	0	0.2917	0.179	0.404	0.057	5.092	0	1.1289	1.022	1.236	0.054	20.739	0	-0.1513
Abnormal findings on examination of urine	genitourinary	0.7186	-1.845	3.283	1.308	0.549	2.05156	0.158025	26.6556	10	6521	10	8343	0.582795	0.790868	not_significant	0.312084	0.234484	1.4325	1.234	1.631	0.101	14.141	0	-0.0498	-0.055	-0.045	0.002	-20.55	0	0.443	0.306	0.58	0.07	6.35	0	0.2902	0.178	0.402	0.057	5.068	0	1.126	1.019	1.233	0.054	20.701	0	-0.1531
Abnormal findings on study of brain and/or nervous system	neurological	-0.1434	-1.435	1.148	0.659	-0.218	0.866407	0.238115	3.15188	10	6521	10	8343	0.827678	0.927796	not_significant	-0.0622778	0.0821386	1.4334	1.235	1.632	0.101	14.147	0	-0.0498	-0.055	-0.045	0.002	-20.553	0	0.4423	0.306	0.579	0.07	6.339	0	0.2898	0.178	0.402	0.057	5.059	0	1.1255	1.019	1.232	0.054	20.688	0	-0.1537
Abnormal function study of cardiovascular system	circulatory system	-0.2186	-1.009	0.572	0.403	-0.542	0.803643	0.364583	1.77181	10	6521	25	8328	0.587705	0.794187	not_significant	-0.0949368	0.230841	1.4311	1.232	1.63	0.101	14.118	0	-0.0498	-0.055	-0.045	0.002	-20.504	0	0.4425	0.306	0.579	0.07	6.344	0	0.29	0.178	0.402	0.057	5.064	0	1.1255	1.019	1.232	0.054	20.692	0	-0.1534
Abnormal granulation tissue	dermatologic	0.4896	-0.575	1.554	0.543	0.901	1.63166	0.562705	4.73035	10	6521	10	8343	0.367418	0.619668	not_significant	0.212631	0.43484	1.4331	1.234	1.632	0.101	14.146	0	-0.0498	-0.055	-0.045	0.002	-20.558	0	0.4429	0.306	0.58	0.07	6.349	0	0.2901	0.178	0.402	0.057	5.065	0	1.1261	1.019	1.233	0.054	20.702	0	-0.1532
Abnormal heart sounds	circulatory system	0.2165	-0.223	0.656	0.224	0.965	1.24172	0.800115	1.92707	38	6493	54	8299	0.334569	0.585496	not_significant	0.0940248	0.475514	1.4343	1.236	1.633	0.101	14.158	0	-0.0499	-0.055	-0.045	0.002	-20.573	0	0.4435	0.307	0.58	0.07	6.356	0	0.2901	0.178	0.402	0.057	5.066	0	1.1263	1.02	1.233	0.054	20.707	0	-0.1541
Abnormal involuntary movements	neurological	0.191	-0.122	0.504	0.16	1.197	1.21046	0.885148	1.65533	80	6451	96	8257	0.231299	0.468446	not_significant	0.0829502	0.635826	1.4334	1.235	1.632	0.101	14.15	0	-0.0499	-0.055	-0.045	0.002	-20.574	0	0.4437	0.307	0.58	0.07	6.36	0	0.2898	0.178	0.402	0.057	5.061	0	1.1263	1.02	1.233	0.054	20.706	0	-0.1534
Abnormal posture	symptoms	-0.7506	-1.757	0.255	0.513	-1.462	0.472083	0.172562	1.29046	10	6521	19	8334	0.143635	0.351881	not_significant	-0.325981	0.842741	1.4331	1.235	1.632	0.101	14.145	0	-0.0498	-0.055	-0.045	0.002	-20.55	0	0.4427	0.306	0.579	0.07	6.346	0	0.2911	0.179	0.403	0.057	5.083	0	1.1261	1.019	1.233	0.054	20.703	0	-0.1509
Abnormal reflex	neurological	0.1332	-1.162	1.428	0.661	0.202	1.14248	0.31286	4.17035	10	6521	10	8343	0.840195	0.929825	not_significant	0.057848	0.0756198	1.4332	1.235	1.632	0.101	14.147	0	-0.0498	-0.055	-0.045	0.002	-20.552	0	0.4429	0.306	0.58	0.07	6.348	0	0.2904	0.178	0.403	0.057	5.07	0	1.126	1.019	1.233	0.054	20.699	0	-0.1532
Abnormal results of function study of kidney	genitourinary	0.5698	-0.098	1.238	0.341	1.672	1.76791	0.906649	3.44871	18	6513	20	8333	0.0944927	0.276997	not_significant	0.247461	1.0246	1.435	1.236	1.634	0.101	14.163	0	-0.0499	-0.055	-0.045	0.002	-20.585	0	0.4434	0.307	0.58	0.07	6.355	0	0.2906	0.178	0.403	0.057	5.073	0	1.1275	1.021	1.234	0.054	20.725	0	-0.1534
Abnormal results of function study of liver	digestive	0.1998	-0.201	0.601	0.205	0.977	1.22116	0.817912	1.82394	50	6481	55	8298	0.328533	0.578443	not_significant	0.086772	0.483421	1.4335	1.235	1.632	0.101	14.149	0	-0.0499	-0.055	-0.045	0.002	-20.563	0	0.4422	0.305	0.579	0.07	6.338	0	0.2886	0.176	0.401	0.057	5.037	0	1.1257	1.019	1.232	0.054	20.697	0	-0.1534
Abnormal results of function study of pulmonary system	respiratory	0.8737	-0.033	1.78	0.463	1.889	2.39576	0.967539	5.92986	15	6516	10	8343	0.0589151	0.200392	not_significant	0.379443	1.22977	1.4313	1.233	1.63	0.101	14.127	0	-0.0498	-0.055	-0.045	0.002	-20.557	0	0.445	0.308	0.582	0.07	6.377	0	0.289	0.177	0.401	0.057	5.046	0	1.1271	1.021	1.234	0.054	20.718	0	-0.1513
Abnormal results of function study of thyroid	endocrine/metabolic	0.3249	-0.173	0.823	0.254	1.28	1.38389	0.841138	2.27732	32	6499	39	8314	0.200556	0.434942	not_significant	0.141102	0.697765	1.4351	1.237	1.634	0.101	14.164	0	-0.05	-0.055	-0.045	0.002	-20.585	0	0.4449	0.308	0.582	0.07	6.375	0	0.2916	0.179	0.404	0.057	5.091	0	1.1278	1.021	1.234	0.054	20.724	0	-0.1514
Abnormal results of other function studies (bladder, pancreas, placenta, spleen, etc)	symptoms	2.125	-0.067	4.317	1.119	1.9	8.3729	0.935195	74.9634	10	6521	10	8343	0.0574515	0.198669	not_significant	0.922876	1.2407	1.4328	1.234	1.631	0.101	14.141	0	-0.0498	-0.055	-0.045	0.002	-20.554	0	0.4424	0.306	0.579	0.07	6.339	0	0.2896	0.177	0.402	0.057	5.057	0	1.1266	1.02	1.233	0.054	20.711	0	-0.1535
Abnormal serum enzyme levels	digestive	0.1131	-0.131	0.357	0.125	0.908	1.11974	0.877218	1.42904	127	6404	162	8191	0.363626	0.616667	not_significant	0.0491187	0.439345	1.4317	1.233	1.63	0.101	14.131	0	-0.0499	-0.055	-0.045	0.002	-20.559	0	0.4432	0.306	0.58	0.07	6.353	0	0.2895	0.177	0.402	0.057	5.055	0	1.1266	1.02	1.233	0.054	20.71	0	-0.1536
Abnormal spermatozoa	genitourinary	3.1617	2.88	3.443	0.144	22.021	23.6107	17.8143	31.2807	806	5725	54	8299	1.80882e-107	6.52078e-105	mi_significant	1.37311	106.743	1.2081	1.002	1.414	0.105	11.501	0	-0.0485	-0.053	-0.044	0.003	-19.336	0	0.397	0.253	0.541	0.073	5.411	0	0.3568	0.24	0.473	0.059	6.002	0	1.2175	1.107	1.328	0.056	21.658	0	-0.1174
Abnormal sputum	respiratory	1.3753	-0.841	3.592	1.131	1.216	3.95626	0.431279	36.3066	10	6521	10	8343	0.22397	0.459409	not_significant	0.597285	0.64981	1.4334	1.235	1.632	0.101	14.148	0	-0.0499	-0.055	-0.045	0.002	-20.56	0	0.4433	0.307	0.58	0.07	6.354	0	0.2902	0.178	0.402	0.057	5.068	0	1.1254	1.019	1.232	0.054	20.689	0	-0.1528
Abnormal tumor markers	symptoms	1.2366	-1.034	3.508	1.159	1.067	3.44388	0.355582	33.3814	10	6521	10	8343	0.285861	0.52511	not_significant	0.537049	0.543845	1.4305	1.232	1.629	0.101	14.119	0	-0.0498	-0.055	-0.045	0.002	-20.529	0	0.4431	0.306	0.58	0.07	6.352	0	0.2901	0.178	0.402	0.057	5.066	0	1.1262	1.02	1.233	0.054	20.705	0	-0.1536
Abnormal weight gain	endocrine/metabolic	-0.2746	-0.596	0.047	0.164	-1.672	0.759876	0.551011	1.04812	63	6468	117	8236	0.0944555	0.276997	not_significant	-0.119257	1.02477	1.4354	1.237	1.634	0.101	14.165	0	-0.0498	-0.055	-0.045	0.002	-20.537	0	0.4402	0.303	0.577	0.07	6.309	0	0.2894	0.177	0.402	0.057	5.053	0	1.1253	1.019	1.232	0.054	20.687	0	-0.1527
Abnormality of gait	neurological	0.3984	-0.02	0.817	0.214	1.866	1.48944	0.980199	2.2637	46	6485	54	8299	0.0620837	0.206839	not_significant	0.173023	1.20702	1.439	1.24	1.638	0.101	14.203	0	-0.05	-0.055	-0.045	0.002	-20.623	0	0.4407	0.304	0.577	0.07	6.316	0	0.289	0.177	0.401	0.057	5.046	0	1.1268	1.02	1.233	0.054	20.712	0	-0.1535
Abnormality of red blood cells	hematopoietic	0.3115	-0.217	0.84	0.27	1.156	1.36547	0.80493	2.31637	28	6503	32	8321	0.247863	0.489216	not_significant	0.135283	0.605788	1.4331	1.235	1.632	0.101	14.147	0	-0.0499	-0.055	-0.045	0.002	-20.567	0	0.443	0.306	0.58	0.07	6.35	0	0.2901	0.178	0.402	0.057	5.065	0	1.1266	1.02	1.233	0.054	20.711	0	-0.1534
Abnormality of secretion of glucagon or gastrin	endocrine/metabolic	0.7389	-2.051	3.529	1.423	0.519	2.09363	0.128606	34.0899	10	6521	10	8343	0.603675	0.799448	not_significant	0.3209	0.219197	1.433	1.234	1.632	0.101	14.146	0	-0.0498	-0.055	-0.045	0.002	-20.553	0	0.4427	0.306	0.579	0.07	6.346	0	0.2902	0.178	0.402	0.057	5.068	0	1.1258	1.019	1.232	0.054	20.699	0	-0.1537
Absent or infrequent menstruation	genitourinary	0.7663	-2.048	3.58	1.436	0.534	2.15179	0.128993	35.8735	10	6521	10	8343	0.593538	0.795429	not_significant	0.3328	0.226551	1.4335	1.235	1.632	0.101	14.149	0	-0.0498	-0.055	-0.045	0.002	-20.556	0	0.4427	0.306	0.579	0.07	6.346	0	0.2899	0.178	0.402	0.057	5.062	0	1.1259	1.019	1.232	0.054	20.7	0	-0.1535
Acid-base balance disorder	endocrine/metabolic	1.8711	-0.601	4.343	1.261	1.483	6.49544	0.548263	76.938	10	6521	10	8343	0.137974	0.344417	not_significant	0.812608	0.860201	1.436	1.237	1.635	0.101	14.171	0	-0.0499	-0.055	-0.045	0.002	-20.577	0	0.4416	0.305	0.578	0.07	6.329	0	0.2895	0.177	0.402	0.057	5.056	0	1.1257	1.019	1.232	0.054	20.695	0	-0.1536
Acidosis	endocrine/metabolic	1.1795	0.667	1.692	0.261	4.515	3.25275	1.94838	5.43033	51	6480	25	8328	6.33865e-06	0.000108813	mi_significant	0.51225	5.198	1.4371	1.239	1.636	0.101	14.184	0	-0.0502	-0.055	-0.045	0.002	-20.681	0	0.4431	0.306	0.58	0.07	6.343	0	0.2908	0.178	0.403	0.057	5.073	0	1.1314	1.025	1.238	0.054	20.775	0	-0.1472
Acne	dermatologic	0.0292	-0.199	0.257	0.116	0.251	1.02963	0.81955	1.29305	145	6386	188	8165	0.802098	0.918686	not_significant	0.0126814	0.0957724	1.4314	1.232	1.63	0.101	14.103	0	-0.0498	-0.055	-0.045	0.002	-20.531	0	0.443	0.306	0.58	0.07	6.349	0	0.2904	0.178	0.403	0.057	5.071	0	1.1261	1.02	1.233	0.054	20.699	0	-0.1536
Acquired absence of breast	neoplasms	-0.815	-2.063	0.433	0.637	-1.28	0.442639	0.127072	1.54188	10	6521	10	8343	0.20058	0.434942	not_significant	-0.35395	0.697712	1.433	1.234	1.632	0.101	14.146	0	-0.0498	-0.055	-0.045	0.002	-20.55	0	0.4424	0.306	0.579	0.07	6.342	0	0.2902	0.178	0.402	0.057	5.068	0	1.1274	1.021	1.234	0.054	20.72	0	-0.1533
Acquired absence of limb		0.9563	-0.326	2.238	0.654	1.462	2.60205	0.721805	9.37456	10	6521	10	8343	0.143729	0.351881	not_significant	0.415316	0.842455	1.4325	1.234	1.631	0.101	14.14	0	-0.0498	-0.055	-0.045	0.002	-20.554	0	0.4427	0.306	0.579	0.07	6.346	0	0.2896	0.177	0.402	0.057	5.056	0	1.1264	1.02	1.233	0.054	20.708	0	-0.1533
Acquired absence of organs		0.4843	0.237	0.732	0.126	3.832	1.62304	1.26744	2.07923	151	6380	142	8211	0.000127013	0.00134982	mi_significant	0.210329	3.89615	1.4425	1.244	1.641	0.101	14.241	0	-0.0502	-0.055	-0.045	0.002	-20.691	0	0.4391	0.302	0.576	0.07	6.292	0	0.2781	0.166	0.391	0.057	4.847	0	1.1238	1.017	1.23	0.054	20.649	0	-0.1591
Acquired acanthosis nigricans	dermatologic	-0.0006	-1.137	1.135	0.58	-0.001	0.9994	0.32078	3.11117	10	6521	10	8343	0.99912	0.99912	not_significant	-0.000260577	0.000382261	1.433	1.234	1.632	0.101	14.146	0	-0.0498	-0.055	-0.045	0.002	-20.553	0	0.4427	0.306	0.579	0.07	6.346	0	0.2902	0.178	0.402	0.057	5.068	0	1.1258	1.019	1.232	0.054	20.699	0	-0.1534
Acquired coagulation factor deficiency	hematopoietic	1.3691	-1.112	3.85	1.266	1.081	3.93181	0.328901	46.9931	10	6521	10	8343	0.27949	0.518307	not_significant	0.594593	0.553633	1.4342	1.236	1.633	0.101	14.156	0	-0.0499	-0.055	-0.045	0.002	-20.562	0	0.4418	0.305	0.579	0.07	6.332	0	0.2897	0.177	0.402	0.057	5.058	0	1.1259	1.019	1.232	0.054	20.7	0	-0.1536
Acquired deformities of finger	musculoskeletal	-0.3259	-1.113	0.461	0.402	-0.812	0.721877	0.328572	1.58566	10	6521	22	8331	0.416971	0.667338	not_significant	-0.141537	0.379895	1.4316	1.233	1.63	0.101	14.131	0	-0.0498	-0.055	-0.045	0.002	-20.527	0	0.4423	0.306	0.579	0.07	6.341	0	0.2904	0.178	0.403	0.057	5.07	0	1.1256	1.019	1.232	0.054	20.694	0	-0.1532
Acquired deformities of forearm	musculoskeletal	-1.0155	-3.185	1.154	1.107	-0.917	0.362221	0.0413782	3.17085	10	6521	10	8343	0.358899	0.611017	not_significant	-0.441026	0.445028	1.4328	1.234	1.631	0.101	14.143	0	-0.0498	-0.055	-0.045	0.002	-20.547	0	0.4429	0.306	0.58	0.07	6.349	0	0.2903	0.178	0.403	0.057	5.069	0	1.1255	1.019	1.232	0.054	20.693	0	-0.1532
Acquired deformities of knee	musculoskeletal	-1.136	-2.767	0.495	0.832	-1.365	0.321101	0.0628503	1.6405	10	6521	10	8343	0.172148	0.396544	not_significant	-0.493359	0.764099	1.4346	1.236	1.633	0.101	14.16	0	-0.0498	-0.055	-0.045	0.002	-20.558	0	0.4416	0.305	0.578	0.07	6.33	0	0.2899	0.178	0.402	0.057	5.061	0	1.1255	1.019	1.232	0.054	20.691	0	-0.1541
Acquired foot deformities	musculoskeletal	-0.2357	-0.818	0.347	0.297	-0.793	0.790018	0.441313	1.41482	18	6513	38	8315	0.427667	0.674878	not_significant	-0.102363	0.368894	1.433	1.234	1.632	0.101	14.145	0	-0.0498	-0.055	-0.045	0.002	-20.522	0	0.4418	0.305	0.579	0.07	6.332	0	0.289	0.177	0.401	0.057	5.045	0	1.1241	1.017	1.231	0.054	20.651	0	-0.1551
Acquired hemolytic anemias	hematopoietic	0.6127	-1.354	2.579	1.003	0.611	1.84541	0.258205	13.1839	10	6521	10	8343	0.5414	0.763695	not_significant	0.266092	0.266482	1.4325	1.234	1.631	0.101	14.141	0	-0.0498	-0.055	-0.045	0.002	-20.552	0	0.4432	0.306	0.58	0.07	6.353	0	0.2907	0.178	0.403	0.057	5.076	0	1.1263	1.02	1.233	0.054	20.706	0	-0.1532
Acquired hypothyroidism	endocrine/metabolic	0.25	-0.155	0.655	0.207	1.209	1.28403	0.856415	1.92514	44	6487	64	8289	0.226581	0.46222	not_significant	0.108574	0.644776	1.4348	1.236	1.633	0.101	14.162	0	-0.0499	-0.055	-0.045	0.002	-20.582	0	0.4444	0.308	0.581	0.07	6.369	0	0.2907	0.178	0.403	0.057	5.076	0	1.1278	1.021	1.234	0.054	20.724	0	-0.1532
Acquired spondylolisthesis	musculoskeletal	-0.2046	-0.712	0.302	0.259	-0.791	0.814973	0.490662	1.35256	24	6507	49	8304	0.429077	0.676206	not_significant	-0.0888567	0.367465	1.4315	1.233	1.63	0.101	14.128	0	-0.0498	-0.055	-0.045	0.002	-20.521	0	0.4431	0.306	0.58	0.07	6.352	0	0.2911	0.179	0.403	0.057	5.083	0	1.1255	1.019	1.232	0.054	20.694	0	-0.1531
Acquired toe deformities	musculoskeletal	-0.545	-1.448	0.358	0.46	-1.183	0.579842	0.23504	1.43047	10	6521	21	8332	0.236632	0.47334	not_significant	-0.23669	0.625927	1.4323	1.234	1.631	0.101	14.136	0	-0.0498	-0.055	-0.045	0.002	-20.532	0	0.4419	0.305	0.579	0.07	6.335	0	0.29	0.178	0.402	0.057	5.065	0	1.1257	1.019	1.232	0.054	20.697	0	-0.1528
Acromegaly and gigantism	endocrine/metabolic	0.3425	-2.696	3.381	1.55	0.221	1.40846	0.0674749	29.4002	10	6521	10	8343	0.825137	0.927221	not_significant	0.148746	0.0834738	1.4329	1.234	1.631	0.101	14.145	0	-0.0498	-0.055	-0.045	0.002	-20.551	0	0.4427	0.306	0.579	0.07	6.346	0	0.2901	0.178	0.402	0.057	5.065	0	1.1258	1.019	1.232	0.054	20.699	0	-0.1534
Actinic keratosis	dermatologic	-0.6951	-0.968	-0.423	0.139	-4.999	0.499025	0.379842	0.655079	72	6459	270	8083	5.75304e-07	1.29623e-05	con_significant	-0.301878	6.2401	1.3871	1.188	1.586	0.102	13.642	0	-0.0482	-0.053	-0.043	0.002	-19.707	0	0.4272	0.29	0.564	0.07	6.119	0	0.2857	0.173	0.398	0.057	4.981	0	1.1163	1.009	1.223	0.054	20.491	0	-0.161
Acute (transverse) myelitis	neurological	1.444	-0.831	3.719	1.161	1.244	4.23761	0.435613	41.2232	10	6521	10	8343	0.213444	0.44998	not_significant	0.627121	0.670716	1.4331	1.235	1.632	0.101	14.146	0	-0.0498	-0.055	-0.045	0.002	-20.552	0	0.4417	0.305	0.578	0.07	6.33	0	0.2891	0.177	0.401	0.057	5.048	0	1.1258	1.019	1.232	0.054	20.699	0	-0.1537
Acute and chronic tonsillitis	respiratory	-0.644	-1.977	0.689	0.68	-0.947	0.525187	0.138484	1.99172	10	6521	10	8343	0.34363	0.593541	not_significant	-0.279686	0.463909	1.4321	1.234	1.631	0.101	14.137	0	-0.0498	-0.055	-0.045	0.002	-20.535	0	0.442	0.305	0.579	0.07	6.336	0	0.29	0.178	0.402	0.057	5.064	0	1.1255	1.019	1.232	0.054	20.693	0	-0.1536
Acute and subacute necrosis of liver	digestive	1.2509	-0.479	2.981	0.883	1.417	3.49349	0.619402	19.7075	10	6521	10	8343	0.156379	0.373343	not_significant	0.543259	0.80582	1.4315	1.233	1.63	0.101	14.129	0	-0.0498	-0.055	-0.045	0.002	-20.556	0	0.4447	0.308	0.581	0.07	6.373	0	0.2916	0.179	0.404	0.057	5.091	0	1.1278	1.021	1.234	0.054	20.726	0	-0.1517
Acute appendicitis	digestive	-0.5413	-1.196	0.114	0.334	-1.62	0.581991	0.302401	1.12075	15	6516	29	8324	0.105274	0.293626	not_significant	-0.235084	0.97768	1.4344	1.236	1.633	0.101	14.158	0	-0.0498	-0.055	-0.045	0.002	-20.558	0	0.4436	0.307	0.58	0.07	6.359	0	0.2903	0.178	0.403	0.057	5.069	0	1.1275	1.021	1.234	0.054	20.723	0	-0.1524
Acute bronchitis and bronchiolitis	respiratory	-0.2513	-0.512	0.009	0.133	-1.889	0.777789	0.599296	1.00904	87	6444	206	8147	0.0589225	0.200392	not_significant	-0.109138	1.22972	1.4362	1.238	1.635	0.101	14.175	0	-0.0496	-0.054	-0.045	0.002	-20.441	0	0.4335	0.296	0.571	0.07	6.2	0	0.2808	0.168	0.394	0.057	4.886	0	1.1146	1.007	1.222	0.055	20.378	0	-0.1604
Acute bronchospasm	respiratory	-0.0051	-0.585	0.575	0.296	-0.017	0.994913	0.557106	1.77713	19	6512	35	8318	0.986274	0.992684	not_significant	-0.0022149	0.0060025	1.433	1.234	1.632	0.101	14.146	0	-0.0498	-0.055	-0.045	0.002	-20.551	0	0.4427	0.306	0.579	0.07	6.346	0	0.2902	0.178	0.402	0.057	5.068	0	1.1258	1.019	1.232	0.054	20.698	0	-0.1534
Acute cystitis	genitourinary	0.3337	-0.275	0.942	0.311	1.075	1.39612	0.759572	2.56511	21	6510	25	8328	0.282568	0.521052	not_significant	0.144924	0.548878	1.4335	1.235	1.632	0.101	14.151	0	-0.0499	-0.055	-0.045	0.002	-20.568	0	0.4425	0.306	0.579	0.07	6.343	0	0.2898	0.178	0.402	0.057	5.061	0	1.1266	1.02	1.233	0.054	20.711	0	-0.1534
Acute dermatitis due to solar radiation	dermatologic	-0.6158	-1.37	0.138	0.385	-1.601	0.540209	0.254107	1.14798	10	6521	27	8326	0.109419	0.301112	not_significant	-0.267439	0.960906	1.4337	1.235	1.632	0.101	14.151	0	-0.0498	-0.055	-0.045	0.002	-20.528	0	0.4402	0.303	0.577	0.07	6.309	0	0.2885	0.176	0.401	0.057	5.036	0	1.1244	1.018	1.231	0.054	20.669	0	-0.1549
Acute gastritis	digestive	-0.379	-1.186	0.428	0.412	-0.92	0.684546	0.305441	1.53419	10	6521	22	8331	0.357474	0.610032	not_significant	-0.164598	0.446756	1.4334	1.235	1.632	0.101	14.149	0	-0.0498	-0.055	-0.045	0.002	-20.539	0	0.4411	0.304	0.578	0.07	6.322	0	0.2893	0.177	0.402	0.057	5.052	0	1.1246	1.018	1.231	0.054	20.67	0	-0.1542
Acute glomerulonephritis, NOS	genitourinary	0.6416	-2.148	3.431	1.423	0.451	1.89952	0.116717	30.9075	10	6521	10	8343	0.652102	0.834186	not_significant	0.278643	0.185684	1.4332	1.235	1.632	0.101	14.148	0	-0.0498	-0.055	-0.045	0.002	-20.554	0	0.4427	0.306	0.579	0.07	6.346	0	0.2899	0.178	0.402	0.057	5.063	0	1.1258	1.019	1.232	0.054	20.699	0	-0.1535
Acute graft-versus-host disease	infectious diseases	2.1746	-0.014	4.363	1.117	1.948	8.79866	0.986098	78.4923	10	6521	10	8343	0.0514552	0.187244	not_significant	0.944417	1.28857	1.4335	1.235	1.632	0.101	14.144	0	-0.0498	-0.055	-0.045	0.002	-20.547	0	0.4427	0.306	0.579	0.07	6.346	0	0.288	0.176	0.4	0.057	5.028	0	1.1249	1.018	1.232	0.054	20.68	0	-0.1541
Acute laryngitis and tracheitis	respiratory	-0.6316	-1.401	0.138	0.393	-1.608	0.53174	0.24635	1.14798	10	6521	30	8323	0.107888	0.298608	not_significant	-0.2743	0.967026	1.4335	1.235	1.632	0.101	14.148	0	-0.0498	-0.055	-0.045	0.002	-20.546	0	0.4423	0.306	0.579	0.07	6.34	0	0.2905	0.178	0.403	0.057	5.073	0	1.1256	1.019	1.232	0.054	20.694	0	-0.1508
Acute osteomyelitis	musculoskeletal	2.594	0.351	4.837	1.145	2.266	13.3832	1.42049	126.091	10	6521	10	8343	0.0234375	0.105331	not_significant	1.12656	1.63009	1.4357	1.237	1.634	0.101	14.164	0	-0.0499	-0.055	-0.045	0.002	-20.583	0	0.4427	0.306	0.58	0.07	6.344	0	0.2896	0.177	0.402	0.057	5.055	0	1.1275	1.021	1.234	0.054	20.724	0	-0.1522
Acute pain	neurological	-0.3788	-0.564	-0.194	0.094	-4.014	0.684683	0.568929	0.823658	192	6339	387	7966	5.96957e-05	0.000742079	con_significant	-0.164511	4.22406	1.4234	1.225	1.622	0.101	14.044	0	-0.0494	-0.054	-0.045	0.002	-20.376	0	0.4485	0.312	0.585	0.07	6.425	0	0.3146	0.202	0.428	0.058	5.461	0	1.1298	1.023	1.236	0.054	20.764	0	-0.1454
Acute pancreatitis	digestive	0.4244	-0.222	1.071	0.33	1.287	1.52867	0.800915	2.9183	19	6512	22	8331	0.198063	0.432083	not_significant	0.184315	0.703197	1.4354	1.237	1.634	0.101	14.167	0	-0.0499	-0.055	-0.045	0.002	-20.581	0	0.4432	0.306	0.58	0.07	6.353	0	0.29	0.178	0.402	0.057	5.063	0	1.1266	1.02	1.233	0.054	20.71	0	-0.1531
Acute pericarditis	circulatory system	-0.8242	-2.173	0.525	0.688	-1.198	0.438586	0.113836	1.69046	10	6521	10	8343	0.231062	0.468446	not_significant	-0.357946	0.636271	1.4351	1.236	1.634	0.101	14.164	0	-0.0499	-0.055	-0.045	0.002	-20.564	0	0.442	0.305	0.579	0.07	6.335	0	0.2901	0.178	0.402	0.057	5.065	0	1.1256	1.019	1.232	0.054	20.694	0	-0.1534
Acute periodontitis	digestive	1.6546	-0.016	3.325	0.852	1.941	5.23099	0.984127	27.799	10	6521	10	8343	0.0522574	0.18886	not_significant	0.718584	1.28185	1.4316	1.233	1.63	0.101	14.13	0	-0.0498	-0.055	-0.045	0.002	-20.549	0	0.4438	0.307	0.581	0.07	6.361	0	0.289	0.177	0.401	0.057	5.045	0	1.1265	1.02	1.233	0.054	20.709	0	-0.153
Acute pharyngitis	respiratory	-0.6301	-0.783	-0.477	0.078	-8.071	0.532539	0.457033	0.620643	250	6281	699	7654	6.9939e-16	1.00852e-13	con_significant	-0.273649	15.1553	1.4844	1.285	1.684	0.102	14.609	0	-0.05	-0.055	-0.045	0.002	-20.592	0	0.4058	0.269	0.543	0.07	5.799	0	0.2798	0.167	0.392	0.057	4.871	0	1.0944	0.987	1.201	0.055	20.042	0	-0.1439
Acute posthemorrhagic anemia	hematopoietic	0.5645	0.111	1.018	0.231	2.442	1.75857	1.11739	2.76765	44	6487	42	8311	0.0146118	0.0714242	not_significant	0.245159	1.8353	1.441	1.242	1.64	0.101	14.22	0	-0.0501	-0.055	-0.045	0.002	-20.647	0	0.4427	0.306	0.579	0.07	6.345	0	0.2862	0.174	0.399	0.057	4.995	0	1.1266	1.02	1.233	0.054	20.707	0	-0.1527
Acute prostatitis	genitourinary	0.0345	-0.593	0.662	0.32	0.108	1.0351	0.552667	1.93867	17	6514	28	8325	0.91423	0.967848	not_significant	0.0149832	0.0389444	1.4329	1.234	1.631	0.101	14.145	0	-0.0498	-0.055	-0.045	0.002	-20.553	0	0.4429	0.306	0.58	0.07	6.347	0	0.2903	0.178	0.403	0.057	5.069	0	1.126	1.019	1.233	0.054	20.697	0	-0.1534
Acute reaction to stress	mental disorders	-0.6308	-1.262	5.79e-05	0.322	-1.96	0.532166	0.283087	1.00006	14	6517	38	8315	0.050021	0.183072	not_significant	-0.273953	1.30085	1.4342	1.236	1.633	0.101	14.158	0	-0.0498	-0.055	-0.045	0.002	-20.529	0	0.442	0.305	0.579	0.07	6.335	0	0.2883	0.176	0.401	0.057	5.033	0	1.1236	1.017	1.23	0.054	20.651	0	-0.1554
Acute renal failure	genitourinary	1.0449	0.712	1.378	0.17	6.157	2.84311	2.03806	3.96696	111	6420	65	8288	7.43616e-10	3.35092e-08	mi_significant	0.453794	9.12865	1.4531	1.254	1.652	0.101	14.34	0	-0.0506	-0.055	-0.046	0.002	-20.853	0	0.4389	0.302	0.576	0.07	6.281	0	0.2834	0.171	0.396	0.057	4.941	0	1.129	1.022	1.236	0.054	20.724	0	-0.1519
Acute sinusitis	respiratory	-0.7549	-0.939	-0.571	0.094	-8.048	0.470058	0.391019	0.56496	158	6373	571	7782	8.41285e-16	1.10285e-13	con_significant	-0.327849	15.0751	1.4598	1.261	1.659	0.101	14.39	0	-0.0492	-0.054	-0.044	0.002	-20.289	0	0.4051	0.268	0.542	0.07	5.786	0	0.2583	0.146	0.371	0.058	4.491	0	1.081	0.974	1.188	0.055	19.757	0	-0.1525
Acute tonsillitis	respiratory	-0.9477	-1.648	-0.247	0.357	-2.652	0.387632	0.192434	0.781141	10	6521	42	8311	0.00800276	0.0445559	con_significant	-0.411581	2.09676	1.4394	1.241	1.638	0.101	14.202	0	-0.0499	-0.055	-0.045	0.002	-20.561	0	0.4391	0.302	0.576	0.07	6.292	0	0.2865	0.174	0.399	0.057	5.001	0	1.1214	1.015	1.228	0.054	20.606	0	-0.1541
Acute upper respiratory infections of multiple or unspecified sites	respiratory	-0.6589	-0.793	-0.525	0.068	-9.653	0.51742	0.452485	0.591555	331	6200	974	7379	4.76342e-22	8.58606e-20	con_significant	-0.286157	21.3221	1.48	1.281	1.679	0.102	14.573	0	-0.0492	-0.054	-0.044	0.002	-20.263	0	0.3912	0.254	0.529	0.07	5.583	0	0.2581	0.145	0.371	0.058	4.483	0	1.0735	0.966	1.181	0.055	19.607	0	-0.1504
Acute vascular insufficiency of intestine	circulatory system	-0.4084	-2.157	1.341	0.892	-0.458	0.664713	0.115672	3.82286	10	6521	10	8343	0.647206	0.829574	not_significant	-0.177366	0.188958	1.4331	1.235	1.632	0.101	14.147	0	-0.0498	-0.055	-0.045	0.002	-20.553	0	0.4426	0.306	0.579	0.07	6.344	0	0.2903	0.178	0.403	0.057	5.07	0	1.1258	1.019	1.232	0.054	20.699	0	-0.1534
Adjustment reaction	mental disorders	-0.0962	-0.329	0.136	0.119	-0.812	0.908282	0.719643	1.14568	129	6402	206	8147	0.416926	0.667338	not_significant	-0.0417791	0.379941	1.4335	1.235	1.632	0.101	14.151	0	-0.0498	-0.055	-0.045	0.002	-20.535	0	0.442	0.305	0.579	0.07	6.335	0	0.2918	0.18	0.404	0.057	5.093	0	1.1252	1.019	1.232	0.054	20.687	0	-0.1529
Adrenal cortical steroids causing adverse effects in therapeutic use		0.9555	-0.537	2.448	0.761	1.255	2.59997	0.584499	11.5652	10	6521	10	8343	0.209412	0.44532	not_significant	0.414968	0.678998	1.4349	1.236	1.633	0.101	14.162	0	-0.0499	-0.055	-0.045	0.002	-20.568	0	0.4416	0.305	0.578	0.07	6.329	0	0.2887	0.176	0.401	0.057	5.041	0	1.1256	1.019	1.232	0.054	20.695	0	-0.1535
Adrenal hyperfunction	endocrine/metabolic	0.7909	-1.652	3.234	1.247	0.634	2.20538	0.191666	25.381	10	6521	10	8343	0.525804	0.751446	not_significant	0.343484	0.279176	1.4316	1.233	1.63	0.101	14.129	0	-0.0498	-0.055	-0.045	0.002	-20.543	0	0.4433	0.307	0.58	0.07	6.354	0	0.2906	0.178	0.403	0.057	5.073	0	1.1264	1.02	1.233	0.054	20.707	0	-0.1528
Adrenogenital disorders	endocrine/metabolic	1.6721	0.362	2.982	0.668	2.502	5.32334	1.4362	19.7272	11	6520	10	8343	0.0123509	0.0627126	not_significant	0.726184	1.9083	1.4306	1.232	1.629	0.101	14.119	0	-0.0498	-0.055	-0.045	0.002	-20.522	0	0.4418	0.305	0.579	0.07	6.332	0	0.2902	0.178	0.402	0.057	5.067	0	1.1247	1.018	1.231	0.054	20.678	0	-0.1571
Adult failure to thrive	endocrine/metabolic	2.2117	0.571	3.853	0.837	2.642	9.13123	1.77004	47.1343	10	6521	10	8343	0.00824937	0.0452304	mi_significant	0.960529	2.08358	1.4365	1.238	1.635	0.101	14.178	0	-0.05	-0.055	-0.045	0.002	-20.608	0	0.4438	0.307	0.581	0.07	6.358	0	0.2904	0.178	0.403	0.057	5.069	0	1.1278	1.021	1.234	0.054	20.726	0	-0.1517
Adverse drug events and drug allergies	injuries & poisonings	0.5333	0.271	0.795	0.134	3.989	1.70455	1.31128	2.21444	140	6391	117	8236	6.63744e-05	0.000802637	mi_significant	0.231609	4.178	1.4376	1.239	1.636	0.101	14.184	0	-0.0501	-0.055	-0.045	0.002	-20.638	0	0.4457	0.309	0.582	0.07	6.387	0	0.2818	0.169	0.394	0.057	4.915	0	1.1224	1.016	1.229	0.054	20.624	0	-0.1588
Adverse effects of antibacterials (not penicillins)	injuries & poisonings	1.0653	0.578	1.553	0.249	4.282	2.90171	1.78247	4.72563	51	6480	28	8325	1.85204e-05	0.000272514	mi_significant	0.462654	4.73235	1.442	1.243	1.641	0.101	14.219	0	-0.0501	-0.055	-0.045	0.002	-20.637	0	0.4406	0.304	0.577	0.07	6.314	0	0.2828	0.17	0.395	0.057	4.934	0	1.124	1.017	1.231	0.054	20.658	0	-0.1584
Adverse effects of sedatives or other central nervous system depressants and anesthetics	injuries & poisonings	0.265	-0.262	0.792	0.269	0.986	1.30343	0.769511	2.20781	31	6500	32	8321	0.324272	0.572338	not_significant	0.115088	0.489091	1.4328	1.234	1.631	0.101	14.144	0	-0.0498	-0.055	-0.045	0.002	-20.556	0	0.4425	0.306	0.579	0.07	6.343	0	0.2891	0.177	0.401	0.057	5.048	0	1.1255	1.019	1.232	0.054	20.691	0	-0.154
Adverse reaction to serum or vaccine	injuries & poisonings	0.479	-0.918	1.876	0.713	0.672	1.61446	0.399317	6.52734	10	6521	10	8343	0.501539	0.73158	not_significant	0.208027	0.299696	1.4326	1.234	1.631	0.101	14.141	0	-0.0498	-0.055	-0.045	0.002	-20.551	0	0.4431	0.306	0.58	0.07	6.351	0	0.2906	0.178	0.403	0.057	5.074	0	1.1259	1.019	1.232	0.054	20.699	0	-0.1534
Agorophobia, social phobia, and panic disorder	mental disorders	0.0854	-0.225	0.396	0.158	0.539	1.08915	0.798516	1.48587	75	6456	101	8252	0.589892	0.795266	not_significant	0.0370887	0.229228	1.4307	1.232	1.629	0.101	14.11	0	-0.0498	-0.055	-0.045	0.002	-20.542	0	0.4436	0.307	0.58	0.07	6.357	0	0.2905	0.178	0.403	0.057	5.073	0	1.127	1.02	1.234	0.054	20.704	0	-0.1531
Alcohol-related disorders	mental disorders	0.2482	-0.103	0.599	0.179	1.387	1.28172	0.902127	1.8203	62	6469	73	8280	0.165591	0.385549	not_significant	0.107792	0.780962	1.4319	1.233	1.631	0.101	14.132	0	-0.0499	-0.055	-0.045	0.002	-20.568	0	0.4442	0.307	0.581	0.07	6.367	0	0.2903	0.178	0.403	0.057	5.069	0	1.1279	1.021	1.235	0.054	20.727	0	-0.1523
Alcoholic liver damage	mental disorders	0.772	-0.077	1.621	0.433	1.783	2.16409	0.92589	5.05815	13	6518	11	8342	0.0746669	0.234604	not_significant	0.335275	1.12687	1.4367	1.238	1.635	0.101	14.179	0	-0.05	-0.055	-0.045	0.002	-20.594	0	0.4427	0.306	0.579	0.07	6.346	0	0.2884	0.176	0.401	0.057	5.035	0	1.1263	1.02	1.233	0.054	20.705	0	-0.1534
Alcoholism	mental disorders	0.1618	-0.132	0.455	0.15	1.08	1.17563	0.876341	1.57617	87	6444	110	8243	0.28036	0.518307	not_significant	0.0702688	0.552284	1.4314	1.233	1.63	0.101	14.128	0	-0.0499	-0.055	-0.045	0.002	-20.566	0	0.4445	0.308	0.581	0.07	6.37	0	0.2908	0.179	0.403	0.057	5.077	0	1.128	1.021	1.235	0.054	20.723	0	-0.1518
Alkalosis	endocrine/metabolic	2.3061	0.783	3.829	0.777	2.967	10.0352	2.18803	46.0165	13	6518	10	8343	0.00300532	0.0211399	mi_significant	1.00153	2.52211	1.4367	1.238	1.635	0.101	14.171	0	-0.05	-0.055	-0.045	0.002	-20.596	0	0.4423	0.305	0.579	0.07	6.336	0	0.2867	0.174	0.399	0.057	5.002	0	1.1278	1.021	1.235	0.054	20.726	0	-0.1508
Allergic conjunctivitis	sense organs	-0.2948	-0.688	0.098	0.2	-1.471	0.744681	0.50258	1.10296	40	6491	85	8268	0.141398	0.348856	not_significant	-0.12803	0.849558	1.4345	1.236	1.633	0.101	14.158	0	-0.0498	-0.055	-0.045	0.002	-20.516	0	0.4396	0.303	0.576	0.07	6.298	0	0.2873	0.175	0.4	0.057	5.015	0	1.123	1.016	1.23	0.054	20.633	0	-0.1552
Allergic reaction to food	injuries & poisonings	-0.0869	-0.418	0.244	0.169	-0.515	0.916769	0.658362	1.27634	64	6467	98	8255	0.606765	0.801241	not_significant	-0.0377402	0.21698	1.434	1.235	1.633	0.101	14.153	0	-0.0498	-0.055	-0.045	0.002	-20.555	0	0.4426	0.306	0.579	0.07	6.344	0	0.2908	0.179	0.403	0.057	5.077	0	1.1256	1.019	1.232	0.054	20.695	0	-0.153
Allergic rhinitis	respiratory	-0.2901	-0.403	-0.177	0.058	-5.021	0.748189	0.668312	0.83778	543	5988	1102	7251	5.1504e-07	1.17887e-05	con_significant	-0.125989	6.28816	1.4718	1.273	1.671	0.102	14.485	0	-0.0494	-0.054	-0.045	0.002	-20.376	0	0.3998	0.262	0.538	0.07	5.688	0	0.2586	0.146	0.372	0.058	4.484	0	1.0845	0.977	1.192	0.055	19.718	0	-0.1715
Allergies, other	injuries & poisonings	-0.0916	-0.317	0.133	0.115	-0.798	0.91247	0.728331	1.14225	142	6389	215	8138	0.424981	0.673061	not_significant	-0.0397814	0.371631	1.4347	1.236	1.633	0.101	14.159	0	-0.0498	-0.055	-0.045	0.002	-20.554	0	0.4424	0.306	0.579	0.07	6.342	0	0.2914	0.179	0.404	0.057	5.087	0	1.1261	1.019	1.233	0.054	20.703	0	-0.1518
Allergy/adverse effect of penicillin	injuries & poisonings	-0.0195	-0.358	0.319	0.173	-0.113	0.980689	0.699073	1.37575	61	6470	99	8254	0.910226	0.96456	not_significant	-0.00846874	0.0408508	1.4327	1.234	1.631	0.101	14.138	0	-0.0498	-0.055	-0.045	0.002	-20.54	0	0.4429	0.306	0.58	0.07	6.347	0	0.2905	0.178	0.403	0.057	5.067	0	1.1259	1.019	1.233	0.054	20.699	0	-0.1531
Alopecia	dermatologic	0.0306	-0.198	0.259	0.117	0.262	1.03107	0.82037	1.29563	141	6390	196	8157	0.793226	0.912874	not_significant	0.0132894	0.100603	1.4324	1.234	1.631	0.101	14.137	0	-0.0498	-0.055	-0.045	0.002	-20.551	0	0.4431	0.306	0.58	0.07	6.35	0	0.2899	0.178	0.402	0.057	5.062	0	1.1259	1.019	1.232	0.054	20.7	0	-0.1539
Alopecia Areata	dermatologic	-0.2014	-0.788	0.385	0.299	-0.673	0.817585	0.454753	1.46961	19	6512	34	8319	0.500738	0.73158	not_significant	-0.0874669	0.30039	1.434	1.235	1.633	0.101	14.154	0	-0.0498	-0.055	-0.045	0.002	-20.555	0	0.4426	0.306	0.579	0.07	6.344	0	0.29	0.178	0.402	0.057	5.064	0	1.1254	1.019	1.232	0.054	20.69	0	-0.1532
Alpha-1-antitrypsin deficiency	endocrine/metabolic	0.105	-1.521	1.731	0.83	0.127	1.11071	0.218493	5.6463	10	6521	10	8343	0.89931	0.961308	not_significant	0.0456009	0.0460907	1.4328	1.234	1.631	0.101	14.143	0	-0.0498	-0.055	-0.045	0.002	-20.55	0	0.4428	0.306	0.579	0.07	6.347	0	0.2902	0.178	0.402	0.057	5.067	0	1.1258	1.019	1.232	0.054	20.699	0	-0.1534
Alteration of consciousness	mental disorders	0.1415	-0.252	0.535	0.201	0.705	1.152	0.777245	1.70745	47	6484	67	8286	0.480929	0.713927	not_significant	0.0614527	0.317919	1.4341	1.236	1.633	0.101	14.156	0	-0.0499	-0.055	-0.045	0.002	-20.566	0	0.4413	0.304	0.578	0.07	6.323	0	0.2896	0.177	0.402	0.057	5.057	0	1.1261	1.019	1.233	0.054	20.703	0	-0.154
Altered mental status	mental disorders	1.0302	0.31	1.75	0.367	2.803	2.80163	1.36343	5.7546	24	6507	14	8339	0.00505614	0.0312916	mi_significant	0.44741	2.29618	1.4358	1.237	1.634	0.101	14.179	0	-0.05	-0.055	-0.045	0.002	-20.609	0	0.4433	0.307	0.58	0.07	6.353	0	0.2882	0.176	0.4	0.057	5.03	0	1.1263	1.02	1.233	0.054	20.701	0	-0.1536
Althete's foot	infectious diseases	-0.1649	-0.43	0.101	0.135	-1.217	0.847978	0.650509	1.10628	93	6438	166	8187	0.223625	0.459355	not_significant	-0.0716152	0.65048	1.4345	1.236	1.633	0.101	14.159	0	-0.0498	-0.055	-0.045	0.002	-20.533	0	0.4405	0.304	0.577	0.07	6.312	0	0.2895	0.177	0.402	0.057	5.054	0	1.1244	1.018	1.231	0.054	20.668	0	-0.1529
Amblyopia	sense organs	0.8845	-0.079	1.848	0.492	1.799	2.42177	0.92404	6.34711	10	6521	10	8343	0.0720255	0.230124	not_significant	0.384133	1.14251	1.4355	1.237	1.634	0.101	14.169	0	-0.0499	-0.055	-0.045	0.002	-20.59	0	0.4438	0.307	0.581	0.07	6.361	0	0.2911	0.179	0.403	0.057	5.083	0	1.1276	1.021	1.234	0.054	20.726	0	-0.1535
Amyloidosis	endocrine/metabolic	0.9814	-0.538	2.5	0.775	1.266	2.66819	0.583915	12.1825	10	6521	10	8343	0.205436	0.440832	not_significant	0.426217	0.687323	1.4343	1.236	1.633	0.101	14.158	0	-0.0499	-0.055	-0.045	0.002	-20.569	0	0.4425	0.306	0.579	0.07	6.344	0	0.2899	0.178	0.402	0.057	5.061	0	1.1258	1.019	1.232	0.054	20.697	0	-0.1533
Amyotrophic Lateral Sclerosis	neurological	-0.0174	-2.833	2.798	1.436	-0.012	0.982751	0.0588361	16.4118	10	6521	10	8343	0.990348	0.995178	not_significant	-0.00755672	0.00421238	1.433	1.234	1.632	0.101	14.144	0	-0.0498	-0.055	-0.045	0.002	-20.549	0	0.4427	0.306	0.579	0.07	6.346	0	0.2902	0.178	0.402	0.057	5.068	0	1.1258	1.019	1.232	0.054	20.697	0	-0.1534
Anal and rectal conditions	digestive	0.2491	0.005	0.493	0.125	2.001	1.28287	1.00501	1.63722	128	6403	162	8191	0.045425	0.169258	not_significant	0.108183	1.34271	1.4338	1.235	1.632	0.101	14.151	0	-0.05	-0.055	-0.045	0.002	-20.604	0	0.4462	0.309	0.583	0.07	6.393	0	0.2907	0.178	0.403	0.057	5.075	0	1.1288	1.022	1.235	0.054	20.743	0	-0.1538
Anal and rectal polyp	digestive	-0.3721	-0.977	0.233	0.309	-1.206	0.689285	0.376439	1.26238	15	6516	44	8309	0.227841	0.463394	not_significant	-0.161601	0.642369	1.4292	1.231	1.628	0.101	14.104	0	-0.0497	-0.054	-0.045	0.002	-20.481	0	0.4426	0.306	0.579	0.07	6.344	0	0.2896	0.177	0.402	0.057	5.057	0	1.1248	1.018	1.231	0.054	20.678	0	-0.153
Anaphylactic shock NOS	injuries & poisonings	-0.851	-1.771	0.07	0.47	-1.812	0.426988	0.170163	1.07251	10	6521	21	8332	0.0700029	0.22482	not_significant	-0.369585	1.15488	1.4354	1.237	1.634	0.101	14.168	0	-0.0499	-0.055	-0.045	0.002	-20.563	0	0.4428	0.306	0.58	0.07	6.347	0	0.2901	0.178	0.402	0.057	5.066	0	1.1256	1.019	1.232	0.054	20.693	0	-0.1527
Anemia in chronic kidney disease	hematopoietic	2.4434	1.612	3.275	0.424	5.762	11.5121	5.01283	26.4432	48	6483	10	8343	8.31422e-09	3.07413e-07	mi_significant	1.06116	8.08018	1.4528	1.254	1.652	0.102	14.298	0	-0.0506	-0.055	-0.046	0.002	-20.772	0	0.4404	0.303	0.577	0.07	6.297	0	0.291	0.179	0.403	0.057	5.074	0	1.1283	1.022	1.235	0.054	20.709	0	-0.1483
Anemia in neoplastic disease	hematopoietic	0.9899	0.155	1.825	0.426	2.324	2.69097	1.16766	6.2028	22	6509	10	8343	0.0201101	0.092648	not_significant	0.429908	1.69659	1.433	1.234	1.632	0.101	14.146	0	-0.0498	-0.055	-0.045	0.002	-20.554	0	0.4394	0.303	0.576	0.07	6.297	0	0.2872	0.175	0.4	0.057	5.014	0	1.1233	1.017	1.23	0.054	20.648	0	-0.1547
Anemia of chronic disease	hematopoietic	1.7838	0.926	2.642	0.438	4.075	5.95243	2.52439	14.0413	30	6501	10	8343	4.5967e-05	0.000602586	mi_significant	0.774694	4.33755	1.433	1.234	1.632	0.101	14.134	0	-0.0499	-0.055	-0.045	0.002	-20.566	0	0.4387	0.302	0.576	0.07	6.282	0	0.2899	0.178	0.402	0.057	5.06	0	1.1259	1.019	1.233	0.054	20.687	0	-0.1538
Aneurysm and dissection of heart	circulatory system	-0.8691	-3.682	1.944	1.435	-0.606	0.419329	0.0251726	6.98664	10	6521	10	8343	0.544837	0.764054	not_significant	-0.377445	0.263733	1.4338	1.235	1.632	0.101	14.152	0	-0.0498	-0.055	-0.045	0.002	-20.557	0	0.4424	0.306	0.579	0.07	6.342	0	0.2899	0.178	0.402	0.057	5.063	0	1.1258	1.019	1.232	0.054	20.698	0	-0.1535
Aneurysm of other specified artery	circulatory system	-0.0667	-1.538	1.405	0.751	-0.089	0.935476	0.21481	4.07553	10	6521	10	8343	0.929191	0.972685	not_significant	-0.0289674	0.0318948	1.433	1.234	1.632	0.101	14.146	0	-0.0498	-0.055	-0.045	0.002	-20.552	0	0.4427	0.306	0.579	0.07	6.346	0	0.2902	0.178	0.402	0.057	5.067	0	1.1258	1.019	1.232	0.054	20.698	0	-0.1534
Angina pectoris	circulatory system	0.6878	0.049	1.326	0.326	2.111	1.98933	1.05022	3.76595	19	6512	25	8328	0.0347668	0.144308	not_significant	0.298708	1.45884	1.4482	1.249	1.647	0.102	14.257	0	-0.0503	-0.055	-0.046	0.002	-20.652	0	0.4412	0.304	0.578	0.07	6.323	0	0.2915	0.179	0.404	0.057	5.09	0	1.1275	1.021	1.234	0.054	20.724	0	-0.1518
Anisometropia	sense organs	0.3135	-0.835	1.462	0.586	0.535	1.36821	0.433874	4.31458	10	6521	10	8343	0.59265	0.795429	not_significant	0.136151	0.227202	1.4336	1.235	1.632	0.101	14.151	0	-0.0499	-0.055	-0.045	0.002	-20.558	0	0.4426	0.306	0.579	0.07	6.345	0	0.2907	0.178	0.403	0.057	5.075	0	1.1262	1.02	1.233	0.054	20.704	0	-0.1529
Ankylosing spondylitis	musculoskeletal	0.2078	-0.465	0.881	0.343	0.605	1.23097	0.628135	2.41331	19	6512	20	8333	0.545223	0.764054	not_significant	0.0902464	0.263426	1.4327	1.234	1.631	0.101	14.143	0	-0.0498	-0.055	-0.045	0.002	-20.557	0	0.4432	0.306	0.58	0.07	6.352	0	0.2905	0.178	0.403	0.057	5.073	0	1.1259	1.019	1.232	0.054	20.699	0	-0.1531
Ankylosis of joint	musculoskeletal	2.0211	-0.164	4.206	1.115	1.813	7.54662	0.848742	67.0877	10	6521	10	8343	0.0698014	0.224686	not_significant	0.877753	1.15614	1.4318	1.233	1.63	0.101	14.132	0	-0.0498	-0.055	-0.045	0.002	-20.544	0	0.4433	0.307	0.58	0.07	6.355	0	0.2901	0.178	0.402	0.057	5.066	0	1.1262	1.02	1.233	0.054	20.703	0	-0.1541
Anomalies of endocrine glands, congenital	congenital anomalies	0.8889	-0.847	2.625	0.886	1.003	2.43245	0.428699	13.8046	10	6521	10	8343	0.315668	0.56262	not_significant	0.386044	0.500769	1.4314	1.233	1.63	0.101	14.128	0	-0.0498	-0.055	-0.045	0.002	-20.542	0	0.4427	0.306	0.579	0.07	6.346	0	0.2909	0.179	0.403	0.057	5.079	0	1.1263	1.02	1.233	0.054	20.706	0	-0.1531
Anomalies of jaw size/symmetry	digestive	-0.7234	-3.111	1.664	1.218	-0.594	0.4851	0.0445564	5.28039	10	6521	10	8343	0.552654	0.769978	not_significant	-0.314169	0.257547	1.4327	1.234	1.631	0.101	14.142	0	-0.0498	-0.055	-0.045	0.002	-20.548	0	0.4427	0.306	0.579	0.07	6.346	0	0.2905	0.178	0.403	0.057	5.072	0	1.1261	1.019	1.233	0.054	20.703	0	-0.1532
Anomalies of pupillary function	sense organs	-0.4652	-1.545	0.615	0.551	-0.844	0.628009	0.213312	1.84966	10	6521	11	8342	0.398491	0.651502	not_significant	-0.202034	0.399581	1.4335	1.235	1.632	0.101	14.152	0	-0.0498	-0.055	-0.045	0.002	-20.551	0	0.4422	0.306	0.579	0.07	6.339	0	0.2897	0.177	0.402	0.057	5.058	0	1.1256	1.019	1.232	0.054	20.694	0	-0.154
Anomalies of respiratory system, congenital	congenital anomalies	0.5446	-1.368	2.457	0.976	0.558	1.72392	0.254616	11.6697	10	6521	10	8343	0.5767	0.786757	not_significant	0.236517	0.23905	1.433	1.234	1.632	0.101	14.145	0	-0.0498	-0.055	-0.045	0.002	-20.552	0	0.4427	0.306	0.579	0.07	6.346	0	0.29	0.178	0.402	0.057	5.064	0	1.1256	1.019	1.232	0.054	20.694	0	-0.1536
Anomalies of tooth position/malocclusion	digestive	0.5738	-1.264	2.412	0.938	0.612	1.775	0.282522	11.1563	10	6521	10	8343	0.540612	0.763529	not_significant	0.249198	0.267114	1.431	1.232	1.63	0.101	14.119	0	-0.0498	-0.055	-0.045	0.002	-20.537	0	0.4436	0.307	0.58	0.07	6.357	0	0.2911	0.179	0.403	0.057	5.081	0	1.1267	1.02	1.233	0.054	20.707	0	-0.1527
Anomalous atrioventricular excitation	circulatory system	-0.1211	-1.59	1.348	0.749	-0.162	0.885945	0.203926	3.84972	10	6521	10	8343	0.871586	0.943451	not_significant	-0.0525931	0.0596896	1.4329	1.234	1.631	0.101	14.144	0	-0.0498	-0.055	-0.045	0.002	-20.551	0	0.4427	0.306	0.579	0.07	6.346	0	0.2903	0.178	0.403	0.057	5.069	0	1.1259	1.019	1.233	0.054	20.7	0	-0.1533
Anorexia	endocrine/metabolic	0.5909	-0.101	1.283	0.353	1.674	1.80561	0.903933	3.60745	21	6510	17	8336	0.0940762	0.276997	not_significant	0.256625	1.02652	1.4332	1.235	1.632	0.101	14.15	0	-0.0499	-0.055	-0.045	0.002	-20.573	0	0.4421	0.305	0.579	0.07	6.337	0	0.2898	0.178	0.402	0.057	5.06	0	1.1265	1.02	1.233	0.054	20.709	0	-0.1528
Anorexia nervosa	mental disorders	0.486	-2.287	3.259	1.415	0.343	1.6258	0.101571	26.0235	10	6521	10	8343	0.731256	0.881804	not_significant	0.211067	0.135931	1.4326	1.234	1.631	0.101	14.141	0	-0.0498	-0.055	-0.045	0.002	-20.552	0	0.4431	0.306	0.58	0.07	6.351	0	0.2906	0.178	0.403	0.057	5.073	0	1.1262	1.02	1.233	0.054	20.702	0	-0.153
Anterior pituitary disorders		2.0691	1.249	2.889	0.418	4.945	7.91769	3.48685	17.9753	40	6491	10	8343	7.62961e-07	1.61793e-05	mi_significant	0.898599	6.1175	1.4202	1.221	1.619	0.101	14.001	0	-0.0496	-0.054	-0.045	0.002	-20.442	0	0.4439	0.307	0.581	0.07	6.358	0	0.2895	0.177	0.402	0.057	5.05	0	1.1273	1.021	1.234	0.054	20.711	0	-0.1577
Anticoagulants causing adverse effects	injuries & poisonings	0.5028	-0.905	1.911	0.718	0.7	1.65334	0.404542	6.75985	10	6521	10	8343	0.483922	0.715708	not_significant	0.218363	0.315225	1.4336	1.235	1.632	0.101	14.15	0	-0.0498	-0.055	-0.045	0.002	-20.557	0	0.4415	0.305	0.578	0.07	6.327	0	0.2898	0.178	0.402	0.057	5.061	0	1.1259	1.019	1.232	0.054	20.7	0	-0.1537
Antihypertensive agents causing adverse effects	injuries & poisonings	0.1316	-1.433	1.696	0.798	0.165	1.14065	0.238592	5.4521	10	6521	10	8343	0.86909	0.942491	not_significant	0.0571532	0.0609355	1.4332	1.235	1.632	0.101	14.147	0	-0.0498	-0.055	-0.045	0.002	-20.553	0	0.4427	0.306	0.579	0.07	6.346	0	0.2901	0.178	0.402	0.057	5.066	0	1.1258	1.019	1.232	0.054	20.698	0	-0.1534
Antineoplastic and immunosuppressive drugs causing adverse effects	injuries & poisonings	1.9401	1.393	2.487	0.279	6.955	6.95945	4.02691	12.0251	107	6424	16	8337	3.51457e-12	2.534e-10	mi_significant	0.842575	11.4541	1.4055	1.206	1.605	0.102	13.826	0	-0.0493	-0.054	-0.044	0.002	-20.239	0	0.4347	0.298	0.572	0.07	6.222	0	0.2795	0.167	0.392	0.057	4.871	0	1.1144	1.008	1.221	0.054	20.454	0	-0.1605
Anxiety disorder	mental disorders	-0.04	-0.16	0.08	0.061	-0.653	0.960789	0.852144	1.08329	525	6006	812	7541	0.513715	0.740777	not_significant	-0.0173718	0.289278	1.4351	1.236	1.634	0.101	14.16	0	-0.0498	-0.055	-0.045	0.002	-20.523	0	0.4407	0.304	0.578	0.07	6.312	0	0.2901	0.178	0.402	0.057	5.066	0	1.1239	1.017	1.231	0.054	20.635	0	-0.1531
Anxiety disorders	mental disorders	-0.139	-1.013	0.734	0.446	-0.312	0.870228	0.363128	2.0834	10	6521	16	8337	0.755067	0.894226	not_significant	-0.0603669	0.122015	1.4328	1.234	1.631	0.101	14.144	0	-0.0498	-0.055	-0.045	0.002	-20.546	0	0.4427	0.306	0.579	0.07	6.346	0	0.2902	0.178	0.402	0.057	5.067	0	1.1257	1.019	1.232	0.054	20.696	0	-0.1533
Aortic aneurysm	circulatory system	0.4888	-0.295	1.272	0.4	1.223	1.63036	0.744532	3.56798	13	6518	17	8336	0.221474	0.456889	not_significant	0.212283	0.654678	1.4364	1.238	1.635	0.101	14.179	0	-0.0499	-0.055	-0.045	0.002	-20.588	0	0.4425	0.306	0.579	0.07	6.343	0	0.2892	0.177	0.402	0.057	5.05	0	1.1256	1.019	1.232	0.054	20.694	0	-0.1545
Aortic ectasia	circulatory system	0.2241	-0.498	0.946	0.369	0.608	1.2512	0.607745	2.57539	14	6517	21	8332	0.54307	0.764054	not_significant	0.0973254	0.265144	1.4344	1.236	1.633	0.101	14.157	0	-0.0499	-0.055	-0.045	0.002	-20.562	0	0.4433	0.307	0.58	0.07	6.354	0	0.2904	0.178	0.403	0.057	5.071	0	1.1261	1.02	1.233	0.054	20.703	0	-0.1532
Aphakia and other disorders of lens	sense organs	1.2094	-0.662	3.08	0.955	1.267	3.35147	0.515819	21.7584	10	6521	10	8343	0.205188	0.440832	not_significant	0.525236	0.687847	1.4351	1.236	1.634	0.101	14.163	0	-0.0499	-0.055	-0.045	0.002	-20.572	0	0.4432	0.306	0.58	0.07	6.353	0	0.2902	0.178	0.402	0.057	5.068	0	1.1261	1.019	1.233	0.054	20.703	0	-0.1534
Aphasia	mental disorders	0.4326	-1.052	1.917	0.757	0.571	1.54126	0.349239	6.80053	10	6521	10	8343	0.567835	0.78097	not_significant	0.187876	0.245778	1.4336	1.235	1.632	0.101	14.151	0	-0.0499	-0.055	-0.045	0.002	-20.558	0	0.4426	0.306	0.579	0.07	6.344	0	0.2901	0.178	0.402	0.057	5.066	0	1.1258	1.019	1.232	0.054	20.698	0	-0.1533
Aphasia/speech disturbance	mental disorders	0.1887	-0.556	0.933	0.38	0.497	1.20768	0.573498	2.54212	13	6518	18	8335	0.619253	0.813263	not_significant	0.0819514	0.208132	1.4341	1.236	1.633	0.101	14.154	0	-0.0499	-0.055	-0.045	0.002	-20.558	0	0.4424	0.306	0.579	0.07	6.342	0	0.2898	0.178	0.402	0.057	5.06	0	1.1259	1.019	1.233	0.054	20.7	0	-0.1533
Aplastic anemia	hematopoietic	1.5346	-0.635	3.704	1.107	1.386	4.63947	0.529935	40.6094	10	6521	10	8343	0.165699	0.385549	not_significant	0.666468	0.780681	1.4295	1.231	1.628	0.101	14.107	0	-0.0497	-0.054	-0.045	0.002	-20.508	0	0.4426	0.306	0.579	0.07	6.345	0	0.2901	0.178	0.402	0.057	5.067	0	1.124	1.017	1.231	0.054	20.662	0	-0.1542
Apnea	respiratory	-0.5353	-0.948	-0.122	0.211	-2.541	0.585494	0.387515	0.885148	32	6499	90	8263	0.0110612	0.0575823	not_significant	-0.232478	1.9562	1.4327	1.234	1.631	0.101	14.14	0	-0.0497	-0.054	-0.045	0.002	-20.51	0	0.4424	0.306	0.579	0.07	6.34	0	0.2934	0.181	0.406	0.057	5.122	0	1.1231	1.016	1.23	0.054	20.645	0	-0.1515
Appendicitis	digestive	-0.8044	-1.617	0.008	0.414	-1.941	0.447356	0.198493	1.00803	10	6521	24	8329	0.0522363	0.18886	not_significant	-0.349346	1.28203	1.4341	1.236	1.633	0.101	14.158	0	-0.0498	-0.055	-0.045	0.002	-20.553	0	0.4426	0.306	0.579	0.07	6.344	0	0.2904	0.178	0.403	0.057	5.07	0	1.1264	1.02	1.233	0.054	20.707	0	-0.1531
Arrhythmia (cardiac) NOS	circulatory system	-0.126	-0.6	0.348	0.242	-0.521	0.881615	0.548812	1.41623	35	6496	45	8308	0.602358	0.799448	not_significant	-0.0547211	0.220145	1.4322	1.234	1.631	0.101	14.136	0	-0.0498	-0.055	-0.045	0.002	-20.533	0	0.4428	0.306	0.579	0.07	6.347	0	0.2904	0.178	0.403	0.057	5.071	0	1.1267	1.02	1.233	0.054	20.705	0	-0.1534
Arterial dissection	circulatory system	0.7028	-0.664	2.07	0.697	1.008	2.0194	0.514788	7.92482	10	6521	10	8343	0.31365	0.560161	not_significant	0.305222	0.503555	1.4359	1.237	1.635	0.101	14.168	0	-0.0499	-0.055	-0.045	0.002	-20.573	0	0.4424	0.306	0.579	0.07	6.341	0	0.2905	0.178	0.403	0.057	5.072	0	1.1263	1.02	1.233	0.054	20.706	0	-0.1531
Arterial embolism and thrombosis	circulatory system	-0.5903	-2.399	1.218	0.923	-0.64	0.554161	0.0908087	3.38042	10	6521	10	8343	0.522334	0.750039	not_significant	-0.256364	0.282052	1.4333	1.235	1.632	0.101	14.149	0	-0.0498	-0.055	-0.045	0.002	-20.552	0	0.4423	0.306	0.579	0.07	6.341	0	0.29	0.178	0.402	0.057	5.064	0	1.1258	1.019	1.232	0.054	20.698	0	-0.1537
Arteritis NOS	circulatory system	0.0656	-1.783	1.914	0.943	0.07	1.0678	0.168133	6.78016	10	6521	10	8343	0.944556	0.977399	not_significant	0.0284897	0.0247724	1.433	1.234	1.632	0.101	14.146	0	-0.0498	-0.055	-0.045	0.002	-20.552	0	0.4427	0.306	0.579	0.07	6.347	0	0.2902	0.178	0.402	0.057	5.068	0	1.1258	1.019	1.232	0.054	20.699	0	-0.1534
Arthralgia/ankylosis of temporomandibular joint	digestive	-0.5204	-1.044	0.004	0.267	-1.947	0.594283	0.352044	1.00401	21	6510	51	8302	0.0515505	0.187244	not_significant	-0.226007	1.28777	1.4377	1.239	1.636	0.101	14.186	0	-0.0499	-0.055	-0.045	0.002	-20.558	0	0.4396	0.303	0.576	0.07	6.299	0	0.2886	0.176	0.401	0.057	5.038	0	1.1232	1.017	1.23	0.054	20.643	0	-0.1546
Arthropathy associated with infections	musculoskeletal	-0.6751	-3.179	1.829	1.278	-0.528	0.509106	0.0416273	6.22766	10	6521	10	8343	0.597203	0.798116	not_significant	-0.293192	0.223878	1.4331	1.235	1.632	0.101	14.147	0	-0.0498	-0.055	-0.045	0.002	-20.554	0	0.4427	0.306	0.579	0.07	6.346	0	0.2905	0.178	0.403	0.057	5.072	0	1.1261	1.019	1.233	0.054	20.703	0	-0.1533
Arthropathy associated with other disorders classified elsewhere	musculoskeletal	0.3121	-0.987	1.611	0.663	0.471	1.36629	0.372693	5.00782	10	6521	10	8343	0.637822	0.824879	not_significant	0.135543	0.1953	1.432	1.233	1.631	0.101	14.134	0	-0.0498	-0.055	-0.045	0.002	-20.543	0	0.4429	0.306	0.58	0.07	6.349	0	0.2903	0.178	0.403	0.057	5.069	0	1.1256	1.019	1.232	0.054	20.693	0	-0.1533
Arthropathy NOS	musculoskeletal	-0.0011	-0.306	0.304	0.156	-0.007	0.998901	0.736387	1.35527	76	6455	124	8229	0.994569	0.995951	not_significant	-0.000477724	0.00236501	1.433	1.234	1.632	0.101	14.131	0	-0.0498	-0.055	-0.045	0.002	-20.488	0	0.4427	0.306	0.579	0.07	6.345	0	0.2902	0.178	0.402	0.057	5.067	0	1.1258	1.019	1.232	0.054	20.695	0	-0.1534
Arthropod-borne diseases	infectious diseases	-0.6315	-2.287	1.024	0.845	-0.748	0.531794	0.101571	2.78431	10	6521	10	8343	0.454623	0.692013	not_significant	-0.274257	0.342349	1.4327	1.234	1.631	0.101	14.143	0	-0.0498	-0.055	-0.045	0.002	-20.55	0	0.4427	0.306	0.579	0.07	6.346	0	0.2918	0.18	0.404	0.057	5.093	0	1.1258	1.019	1.232	0.054	20.699	0	-0.1534
Articular cartilage disorder	musculoskeletal	-0.5453	-1.246	0.156	0.358	-1.525	0.579668	0.287653	1.16883	12	6519	29	8324	0.127371	0.329402	not_significant	-0.236821	0.894931	1.4337	1.235	1.632	0.101	14.151	0	-0.0498	-0.055	-0.045	0.002	-20.539	0	0.4416	0.305	0.578	0.07	6.33	0	0.2898	0.178	0.402	0.057	5.059	0	1.1255	1.019	1.232	0.054	20.691	0	-0.1536
Ascites (non malignant)	digestive	0.731	0.195	1.267	0.273	2.674	2.07716	1.21531	3.55019	34	6497	27	8326	0.00750192	0.0424226	mi_significant	0.317469	2.12483	1.4393	1.241	1.638	0.101	14.202	0	-0.0501	-0.055	-0.045	0.002	-20.636	0	0.442	0.305	0.579	0.07	6.334	0	0.289	0.177	0.401	0.057	5.045	0	1.1274	1.021	1.234	0.054	20.721	0	-0.1519
ASCVD		1.1298	-0.91	3.17	1.041	1.085	3.09504	0.402524	23.8075	10	6521	10	8343	0.277704	0.517267	not_significant	0.490666	0.556418	1.4351	1.236	1.634	0.101	14.163	0	-0.0499	-0.055	-0.045	0.002	-20.569	0	0.4428	0.306	0.58	0.07	6.347	0	0.2898	0.178	0.402	0.057	5.06	0	1.1259	1.019	1.233	0.054	20.7	0	-0.154
Aseptic necrosis of bone	musculoskeletal	0.6882	-0.348	1.724	0.529	1.302	1.99013	0.706099	5.60691	12	6519	10	8343	0.192921	0.426674	not_significant	0.298881	0.714621	1.4331	1.235	1.632	0.101	14.145	0	-0.0498	-0.055	-0.045	0.002	-20.553	0	0.4425	0.306	0.579	0.07	6.342	0	0.2894	0.177	0.402	0.057	5.053	0	1.1246	1.018	1.231	0.054	20.674	0	-0.1535
Aspergillosis	infectious diseases	3.1581	1.12	5.197	1.04	3.036	23.5259	3.06485	180.729	17	6514	10	8343	0.00239478	0.0177091	mi_significant	1.37155	2.62073	1.4345	1.236	1.633	0.101	14.146	0	-0.0499	-0.055	-0.045	0.002	-20.562	0	0.4429	0.306	0.58	0.07	6.347	0	0.2871	0.175	0.399	0.057	5.009	0	1.1258	1.019	1.232	0.054	20.688	0	-0.1535
Asphyxia and hypoxemia		0.7233	0.189	1.258	0.273	2.652	2.06122	1.20804	3.51838	39	6492	26	8327	0.00800203	0.0445559	mi_significant	0.314125	2.0968	1.434	1.236	1.633	0.101	14.158	0	-0.0499	-0.055	-0.045	0.002	-20.591	0	0.4438	0.307	0.581	0.07	6.362	0	0.2874	0.175	0.4	0.057	5.017	0	1.1253	1.019	1.232	0.054	20.684	0	-0.1532
Asthma	respiratory	-0.3047	-0.451	-0.158	0.075	-4.079	0.737345	0.636991	0.85385	314	6217	606	7747	4.52851e-05	0.000599093	con_significant	-0.13233	4.34404	1.4566	1.258	1.656	0.102	14.342	0	-0.0497	-0.054	-0.045	0.002	-20.469	0	0.4234	0.286	0.56	0.07	6.053	0	0.2753	0.163	0.388	0.057	4.796	0	1.1079	1.001	1.215	0.055	20.301	0	-0.1646
Asthma with exacerbation	respiratory	-0.6266	-0.941	-0.312	0.16	-3.906	0.534406	0.390237	0.731982	57	6474	161	8192	9.3676e-05	0.00106481	con_significant	-0.272129	4.02837	1.4469	1.248	1.646	0.101	14.267	0	-0.0498	-0.055	-0.045	0.002	-20.538	0	0.4312	0.294	0.568	0.07	6.175	0	0.2833	0.171	0.396	0.057	4.942	0	1.1152	1.008	1.222	0.054	20.474	0	-0.158
Astigmatism	sense organs	-0.0054	-0.288	0.278	0.144	-0.037	0.994615	0.749762	1.32049	90	6441	137	8216	0.970347	0.987936	not_significant	-0.00234519	0.0130731	1.4329	1.234	1.632	0.101	14.145	0	-0.0498	-0.055	-0.045	0.002	-20.517	0	0.4426	0.306	0.579	0.07	6.336	0	0.2901	0.178	0.402	0.057	5.058	0	1.1257	1.019	1.232	0.054	20.68	0	-0.1535
Atherosclerosis	circulatory system	0.8824	-0.46	2.225	0.685	1.289	2.41669	0.631284	9.25348	10	6521	10	8343	0.19755	0.431617	not_significant	0.383221	0.704323	1.4368	1.238	1.635	0.101	14.176	0	-0.0499	-0.055	-0.045	0.002	-20.582	0	0.4432	0.306	0.58	0.07	6.352	0	0.289	0.177	0.401	0.057	5.045	0	1.1254	1.019	1.232	0.054	20.689	0	-0.1529
Atherosclerosis of aorta	circulatory system	0.7978	-0.146	1.742	0.482	1.657	2.22065	0.864158	5.70875	10	6521	13	8340	0.0976063	0.283196	not_significant	0.34648	1.01052	1.4447	1.246	1.644	0.102	14.225	0	-0.0502	-0.055	-0.045	0.002	-20.615	0	0.4432	0.306	0.58	0.07	6.352	0	0.2894	0.177	0.402	0.057	5.053	0	1.127	1.02	1.234	0.054	20.716	0	-0.1525
Atherosclerosis of native arteries of the extremities with intermittent claudication	circulatory system	1.3178	-0.636	3.272	0.997	1.322	3.73519	0.529406	26.364	10	6521	10	8343	0.18626	0.418489	not_significant	0.572313	0.729881	1.4388	1.24	1.638	0.101	14.189	0	-0.05	-0.055	-0.045	0.002	-20.589	0	0.4429	0.306	0.58	0.07	6.348	0	0.2899	0.178	0.402	0.057	5.063	0	1.125	1.018	1.232	0.054	20.682	0	-0.1534
Atherosclerosis of renal artery	circulatory system	1.4797	-0.243	3.202	0.879	1.684	4.39163	0.784272	24.5816	10	6521	10	8343	0.0922726	0.272658	not_significant	0.642626	1.03493	1.437	1.238	1.636	0.101	14.178	0	-0.0499	-0.055	-0.045	0.002	-20.581	0	0.4417	0.305	0.578	0.07	6.331	0	0.2903	0.178	0.403	0.057	5.069	0	1.125	1.018	1.232	0.054	20.683	0	-0.1542
Atherosclerosis of the extremities	circulatory system	1.1826	-0.244	2.609	0.728	1.625	3.26285	0.783488	13.5855	10	6521	10	8343	0.10426	0.293058	not_significant	0.513597	0.981884	1.4377	1.239	1.636	0.101	14.187	0	-0.05	-0.055	-0.045	0.002	-20.601	0	0.4432	0.306	0.58	0.07	6.352	0	0.2912	0.179	0.403	0.057	5.085	0	1.1267	1.02	1.233	0.054	20.711	0	-0.1523
Atopic/contact dermatitis due to other or unspecified	dermatologic	-0.1314	-0.266	0.003	0.069	-1.915	0.876867	0.766439	1.003	395	6136	668	7685	0.0555419	0.196862	not_significant	-0.0570663	1.25538	1.4392	1.24	1.638	0.101	14.198	0	-0.0497	-0.054	-0.045	0.002	-20.477	0	0.4349	0.298	0.572	0.07	6.224	0	0.2867	0.174	0.399	0.057	5.003	0	1.1193	1.013	1.226	0.054	20.543	0	-0.1551
Atrial fibrillation	circulatory system	0.3891	-0.031	0.809	0.214	1.817	1.47565	0.969476	2.24566	46	6485	55	8298	0.0692456	0.223884	not_significant	0.168984	1.15961	1.4412	1.243	1.64	0.101	14.216	0	-0.0501	-0.055	-0.045	0.002	-20.631	0	0.4435	0.307	0.58	0.07	6.357	0	0.2905	0.178	0.403	0.057	5.073	0	1.1264	1.02	1.233	0.054	20.707	0	-0.1523
Atrial flutter	circulatory system	0.5627	-0.328	1.454	0.455	1.238	1.75541	0.720363	4.2802	11	6520	12	8341	0.215818	0.452281	not_significant	0.244378	0.665913	1.4383	1.24	1.637	0.101	14.186	0	-0.05	-0.055	-0.045	0.002	-20.59	0	0.4419	0.305	0.579	0.07	6.334	0	0.2909	0.179	0.403	0.057	5.079	0	1.1256	1.019	1.232	0.054	20.693	0	-0.153
Atrioventricular [AV] block	circulatory system	0.8412	-1.635	3.317	1.263	0.666	2.31915	0.194952	27.5775	10	6521	10	8343	0.505464	0.734018	not_significant	0.365329	0.296309	1.4323	1.234	1.631	0.101	14.139	0	-0.0498	-0.055	-0.045	0.002	-20.549	0	0.443	0.306	0.58	0.07	6.351	0	0.2905	0.178	0.403	0.057	5.073	0	1.126	1.019	1.233	0.054	20.701	0	-0.1533
Atrioventricular block, complete	circulatory system	0.2407	-2.294	2.776	1.293	0.186	1.27214	0.100862	16.0547	10	6521	10	8343	0.852376	0.936253	not_significant	0.104535	0.0693685	1.4331	1.235	1.632	0.101	14.147	0	-0.0498	-0.055	-0.045	0.002	-20.555	0	0.4427	0.306	0.579	0.07	6.347	0	0.2903	0.178	0.403	0.057	5.069	0	1.1259	1.019	1.233	0.054	20.7	0	-0.1533
Atrophic gastritis	digestive	0.0866	-0.339	0.513	0.217	0.398	1.09046	0.712482	1.67029	41	6490	56	8297	0.690446	0.854906	not_significant	0.0376099	0.160871	1.4337	1.235	1.632	0.101	14.15	0	-0.0499	-0.055	-0.045	0.002	-20.553	0	0.4432	0.306	0.58	0.07	6.352	0	0.2901	0.178	0.402	0.057	5.066	0	1.1258	1.019	1.232	0.054	20.699	0	-0.1533
Attention deficit hyperactivity disorder	mental disorders	-0.1656	-0.395	0.064	0.117	-1.415	0.847385	0.67368	1.06609	128	6403	213	8140	0.157213	0.374712	not_significant	-0.0719192	0.803512	1.4419	1.243	1.641	0.102	14.204	0	-0.0499	-0.055	-0.045	0.002	-20.58	0	0.4389	0.302	0.576	0.07	6.287	0	0.2888	0.176	0.401	0.057	5.041	0	1.1226	1.016	1.229	0.054	20.62	0	-0.1536
Autism	mental disorders	-0.4427	-1.481	0.596	0.53	-0.836	0.6423	0.22741	1.81484	10	6521	10	8343	0.403331	0.656165	not_significant	-0.192262	0.394339	1.4357	1.237	1.634	0.101	14.165	0	-0.0499	-0.055	-0.045	0.002	-20.566	0	0.4422	0.306	0.579	0.07	6.339	0	0.2904	0.178	0.403	0.057	5.071	0	1.1252	1.019	1.232	0.054	20.686	0	-0.1539
Autoimmune disease NEC	endocrine/metabolic	1.8537	-0.412	4.119	1.156	1.604	6.38339	0.662324	61.4977	10	6521	10	8343	0.1088	0.299979	not_significant	0.805052	0.963373	1.4317	1.233	1.63	0.101	14.131	0	-0.0498	-0.055	-0.045	0.002	-20.55	0	0.444	0.307	0.581	0.07	6.365	0	0.2915	0.179	0.404	0.057	5.09	0	1.1268	1.02	1.233	0.054	20.713	0	-0.1528
Autoimmune hemolytic anemias	hematopoietic	1.0208	-1.283	3.324	1.175	0.869	2.77541	0.277204	27.7712	10	6521	10	8343	0.385105	0.640509	not_significant	0.443328	0.414421	1.4317	1.233	1.63	0.101	14.132	0	-0.0498	-0.055	-0.045	0.002	-20.543	0	0.4431	0.306	0.58	0.07	6.352	0	0.2898	0.178	0.402	0.057	5.06	0	1.126	1.019	1.233	0.054	20.701	0	-0.153
Back pain	symptoms	-0.1071	-0.221	0.007	0.058	-1.839	0.898436	0.801717	1.00702	569	5962	969	7384	0.0659339	0.217553	not_significant	-0.0465129	1.18089	1.4399	1.241	1.639	0.101	14.203	0	-0.0496	-0.054	-0.045	0.002	-20.403	0	0.4313	0.294	0.569	0.07	6.158	0	0.2831	0.171	0.396	0.057	4.931	0	1.1142	1.007	1.221	0.055	20.35	0	-0.1597
Bacteremia	infectious diseases	1.3509	0.397	2.305	0.487	2.776	3.8609	1.48736	10.0242	17	6514	10	8343	0.0055067	0.0332245	mi_significant	0.586688	2.25911	1.4366	1.238	1.635	0.101	14.171	0	-0.05	-0.055	-0.045	0.002	-20.593	0	0.4426	0.306	0.579	0.07	6.344	0	0.2889	0.177	0.401	0.057	5.043	0	1.1264	1.02	1.233	0.054	20.706	0	-0.1528
Bacterial enteritis	infectious diseases	0.4711	-0.128	1.07	0.306	1.541	1.60176	0.879853	2.91538	25	6506	23	8330	0.123281	0.322634	not_significant	0.204596	0.909104	1.4337	1.235	1.632	0.101	14.154	0	-0.0499	-0.055	-0.045	0.002	-20.569	0	0.4426	0.306	0.579	0.07	6.344	0	0.2893	0.177	0.402	0.057	5.052	0	1.1253	1.019	1.232	0.054	20.687	0	-0.1547
Bacterial infection NOS	infectious diseases	0.2375	-0.121	0.596	0.183	1.298	1.26807	0.886034	1.81484	61	6470	76	8277	0.194331	0.427173	not_significant	0.103145	0.711458	1.4337	1.235	1.632	0.101	14.155	0	-0.0499	-0.055	-0.045	0.002	-20.569	0	0.4417	0.305	0.578	0.07	6.331	0	0.2878	0.175	0.4	0.057	5.023	0	1.1257	1.019	1.232	0.054	20.695	0	-0.1559
Bacterial pneumonia	respiratory	0.582	-0.045	1.209	0.32	1.82	1.78961	0.955997	3.35013	24	6507	19	8334	0.0686833	0.223148	not_significant	0.252759	1.16315	1.4305	1.232	1.629	0.101	14.12	0	-0.0498	-0.055	-0.045	0.002	-20.549	0	0.4442	0.307	0.581	0.07	6.367	0	0.2905	0.178	0.403	0.057	5.072	0	1.127	1.02	1.234	0.054	20.717	0	-0.153
Balanoposthitis	genitourinary	0.2728	-0.217	0.762	0.25	1.093	1.31364	0.80493	2.14256	32	6499	37	8316	0.274577	0.514877	not_significant	0.118476	0.561335	1.432	1.233	1.631	0.101	14.135	0	-0.0498	-0.055	-0.045	0.002	-20.558	0	0.4441	0.307	0.581	0.07	6.365	0	0.2906	0.178	0.403	0.057	5.074	0	1.1265	1.02	1.233	0.054	20.71	0	-0.1536
Bariatric surgery	digestive	0.1295	-0.434	0.693	0.288	0.45	1.13826	0.647912	1.99971	22	6509	33	8320	0.65254	0.834186	not_significant	0.0562411	0.185393	1.4335	1.235	1.632	0.101	14.149	0	-0.0499	-0.055	-0.045	0.002	-20.556	0	0.4434	0.307	0.58	0.07	6.354	0	0.2902	0.178	0.402	0.057	5.068	0	1.1263	1.02	1.233	0.054	20.704	0	-0.1531
Barrett's esophagus	digestive	0.0311	-0.747	0.809	0.397	0.078	1.03159	0.473786	2.24566	10	6521	21	8332	0.937577	0.974756	not_significant	0.0135066	0.0279929	1.4332	1.235	1.632	0.101	14.141	0	-0.0498	-0.055	-0.045	0.002	-20.536	0	0.4427	0.306	0.579	0.07	6.347	0	0.2902	0.178	0.402	0.057	5.068	0	1.1259	1.019	1.233	0.054	20.698	0	-0.1534
Basal cell carcinoma	neoplasms	-0.5067	-0.962	-0.051	0.232	-2.179	0.60248	0.382128	0.950279	27	6504	80	8273	0.0293192	0.126204	not_significant	-0.220057	1.53285	1.424	1.225	1.623	0.101	14.045	0	-0.0495	-0.054	-0.045	0.002	-20.367	0	0.4396	0.303	0.576	0.07	6.301	0	0.288	0.176	0.4	0.057	5.028	0	1.1239	1.017	1.231	0.054	20.658	0	-0.1553
Benign neoplasm of adrenal gland	neoplasms	0.8687	-0.229	1.967	0.56	1.551	2.38381	0.795329	7.1492	10	6521	10	8343	0.120993	0.31838	not_significant	0.377272	0.917238	1.4349	1.236	1.634	0.101	14.161	0	-0.0499	-0.055	-0.045	0.002	-20.572	0	0.4408	0.304	0.578	0.07	6.318	0	0.2902	0.178	0.402	0.057	5.067	0	1.1264	1.02	1.233	0.054	20.708	0	-0.1536
Benign neoplasm of bone and articular cartilage	neoplasms	-0.5585	-1.333	0.216	0.395	-1.413	0.572067	0.263685	1.2411	10	6521	24	8329	0.157746	0.374744	not_significant	-0.242553	0.802042	1.4336	1.235	1.632	0.101	14.151	0	-0.0498	-0.055	-0.045	0.002	-20.548	0	0.4428	0.306	0.579	0.07	6.347	0	0.2906	0.178	0.403	0.057	5.074	0	1.126	1.019	1.233	0.054	20.701	0	-0.1527
Benign neoplasm of brain, cranial nerves, meninges	neoplasms	-0.4076	-1.288	0.472	0.449	-0.908	0.665245	0.275822	1.6032	10	6521	17	8336	0.363928	0.616667	not_significant	-0.177018	0.438985	1.432	1.233	1.631	0.101	14.136	0	-0.0498	-0.055	-0.045	0.002	-20.535	0	0.4427	0.306	0.579	0.07	6.346	0	0.2909	0.179	0.403	0.057	5.08	0	1.1259	1.019	1.232	0.054	20.7	0	-0.1536
Benign neoplasm of colon	neoplasms	-0.1289	-0.342	0.084	0.109	-1.188	0.879062	0.710348	1.08763	139	6392	342	8011	0.23478	0.472464	not_significant	-0.0559806	0.629339	1.4134	1.212	1.614	0.103	13.778	0	-0.0492	-0.054	-0.044	0.002	-19.861	0	0.4408	0.304	0.578	0.07	6.318	0	0.2887	0.176	0.401	0.057	5.041	0	1.1236	1.017	1.23	0.054	20.646	0	-0.1543
Benign neoplasm of eye	neoplasms	-0.7325	-3.051	1.586	1.183	-0.619	0.480706	0.0473116	4.88417	10	6521	10	8343	0.535756	0.758155	not_significant	-0.318121	0.271033	1.433	1.234	1.632	0.101	14.146	0	-0.0498	-0.055	-0.045	0.002	-20.55	0	0.4425	0.306	0.579	0.07	6.343	0	0.29	0.178	0.402	0.057	5.063	0	1.1258	1.019	1.232	0.054	20.699	0	-0.1534
Benign neoplasm of eye, uveal	neoplasms	-0.2351	-1.146	0.676	0.465	-0.506	0.790492	0.317906	1.966	10	6521	17	8336	0.612896	0.807858	not_significant	-0.102103	0.212613	1.4321	1.234	1.631	0.101	14.135	0	-0.0498	-0.055	-0.045	0.002	-20.532	0	0.4425	0.306	0.579	0.07	6.343	0	0.29	0.178	0.402	0.057	5.065	0	1.1258	1.019	1.232	0.054	20.699	0	-0.1534
Benign neoplasm of lip, oral cavity, and pharynx	neoplasms	-1.5174	-3.024	-0.011	0.769	-1.974	0.219281	0.0486064	0.98906	10	6521	16	8337	0.0484164	0.178103	not_significant	-0.658998	1.31501	1.431	1.232	1.63	0.101	14.124	0	-0.0498	-0.055	-0.045	0.002	-20.515	0	0.4419	0.305	0.579	0.07	6.334	0	0.29	0.178	0.402	0.057	5.063	0	1.1255	1.019	1.232	0.054	20.691	0	-0.1527
Benign neoplasm of male genital organs	neoplasms	0.7884	-0.267	1.844	0.539	1.463	2.19987	0.765673	6.32177	10	6521	10	8343	0.143334	0.351881	not_significant	0.342398	0.843652	1.4334	1.235	1.632	0.101	14.152	0	-0.0499	-0.055	-0.045	0.002	-20.563	0	0.4424	0.306	0.579	0.07	6.342	0	0.2902	0.178	0.402	0.057	5.068	0	1.1252	1.019	1.232	0.054	20.686	0	-0.1545
Benign neoplasm of other parts of digestive system	neoplasms	-0.2507	-0.826	0.324	0.293	-0.854	0.778256	0.437797	1.38265	17	6514	46	8307	0.392949	0.647771	not_significant	-0.108878	0.405663	1.4305	1.232	1.629	0.101	14.115	0	-0.0497	-0.054	-0.045	0.002	-20.495	0	0.4421	0.305	0.579	0.07	6.337	0	0.2899	0.178	0.402	0.057	5.062	0	1.1249	1.018	1.232	0.054	20.679	0	-0.1531
Benign neoplasm of pituitary gland and craniopharyngeal duct (pouch)	neoplasms	1.5105	0.814	2.207	0.355	4.249	4.52899	2.25692	9.08841	35	6496	12	8341	2.14316e-05	0.000312166	mi_significant	0.656002	4.66894	1.4349	1.236	1.634	0.101	14.157	0	-0.05	-0.055	-0.045	0.002	-20.591	0	0.4425	0.306	0.579	0.07	6.341	0	0.2887	0.176	0.401	0.057	5.038	0	1.125	1.018	1.232	0.054	20.674	0	-0.1567
Benign neoplasm of respiratory and intrathoracic organs	neoplasms	-0.8487	-3.001	1.303	1.098	-0.773	0.427971	0.0497373	3.68032	10	6521	10	8343	0.439579	0.684529	not_significant	-0.368586	0.356963	1.4321	1.234	1.631	0.101	14.136	0	-0.0498	-0.055	-0.045	0.002	-20.539	0	0.4433	0.307	0.58	0.07	6.354	0	0.2899	0.178	0.402	0.057	5.063	0	1.1255	1.019	1.232	0.054	20.693	0	-0.1533
Benign neoplasm of skin	neoplasms	-0.6848	-0.802	-0.568	0.06	-11.488	0.504191	0.448431	0.566658	467	6064	1218	7135	1.5212e-30	3.13368e-28	con_significant	-0.297405	29.8178	1.4478	1.249	1.647	0.102	14.263	0	-0.0485	-0.053	-0.044	0.002	-19.964	0	0.399	0.262	0.536	0.07	5.702	0	0.2828	0.17	0.396	0.058	4.917	0	1.1272	1.02	1.234	0.055	20.625	0	-0.1287
Benign neoplasm of unspecified sites	neoplasms	-0.3433	-0.98	0.293	0.325	-1.057	0.709425	0.375311	1.34044	14	6517	37	8316	0.290356	0.529992	not_significant	-0.149093	0.537069	1.4313	1.233	1.63	0.101	14.125	0	-0.0497	-0.055	-0.045	0.002	-20.504	0	0.4417	0.305	0.578	0.07	6.332	0	0.2901	0.178	0.402	0.057	5.065	0	1.1245	1.018	1.231	0.054	20.67	0	-0.154
Bipolar	mental disorders	-0.0189	-0.456	0.418	0.223	-0.085	0.981277	0.633814	1.51892	35	6496	57	8296	0.932284	0.972759	not_significant	-0.00820817	0.0304518	1.433	1.234	1.632	0.101	14.146	0	-0.0498	-0.055	-0.045	0.002	-20.544	0	0.4426	0.306	0.579	0.07	6.343	0	0.2901	0.178	0.402	0.057	5.064	0	1.1257	1.019	1.232	0.054	20.686	0	-0.1535
Bladder neck obstruction	genitourinary	1.0445	0.132	1.957	0.466	2.243	2.84198	1.14111	7.07806	10	6521	10	8343	0.0248805	0.110528	not_significant	0.453621	1.60414	1.4433	1.244	1.642	0.101	14.229	0	-0.0501	-0.055	-0.045	0.002	-20.638	0	0.4425	0.306	0.579	0.07	6.342	0	0.2894	0.177	0.402	0.057	5.053	0	1.1269	1.02	1.234	0.054	20.717	0	-0.1541
Blindness and low vision	sense organs	0.0377	-0.399	0.475	0.223	0.169	1.03842	0.670991	1.60801	34	6497	62	8291	0.865612	0.939919	not_significant	0.0163729	0.0626769	1.4335	1.235	1.632	0.101	14.145	0	-0.0499	-0.055	-0.045	0.002	-20.536	0	0.4428	0.306	0.58	0.07	6.348	0	0.2902	0.178	0.402	0.057	5.067	0	1.1261	1.019	1.233	0.054	20.697	0	-0.1533
Blister	injuries & poisonings	-0.943	-2.304	0.418	0.694	-1.358	0.389458	0.0998586	1.51892	10	6521	10	8343	0.17445	0.399297	not_significant	-0.40954	0.758328	1.4353	1.237	1.634	0.101	14.165	0	-0.0499	-0.055	-0.045	0.002	-20.561	0	0.4415	0.305	0.578	0.07	6.329	0	0.29	0.178	0.402	0.057	5.063	0	1.1252	1.019	1.232	0.054	20.687	0	-0.154
Blood in stool	digestive	0.236	-0.054	0.526	0.148	1.597	1.26617	0.947432	1.69215	89	6442	114	8239	0.110232	0.30228	not_significant	0.102493	0.957691	1.4321	1.234	1.631	0.101	14.133	0	-0.05	-0.055	-0.045	0.002	-20.585	0	0.4469	0.31	0.584	0.07	6.401	0	0.292	0.18	0.404	0.057	5.097	0	1.1298	1.023	1.237	0.054	20.747	0	-0.1512
Blood vessel replaced	circulatory system	1.348	0.553	2.143	0.405	3.325	3.84972	1.73846	8.52497	22	6509	10	8343	0.000885264	0.00773667	mi_significant	0.585429	3.05293	1.4396	1.241	1.638	0.101	14.205	0	-0.05	-0.055	-0.045	0.002	-20.617	0	0.4425	0.306	0.579	0.07	6.341	0	0.2822	0.17	0.395	0.057	4.922	0	1.126	1.019	1.233	0.054	20.698	0	-0.1551
Bone cancer	neoplasms	1.0364	0.174	1.899	0.44	2.355	2.81905	1.19006	6.67921	21	6510	10	8343	0.0184992	0.0863294	not_significant	0.450103	1.73285	1.4287	1.23	1.627	0.101	14.101	0	-0.0498	-0.055	-0.045	0.002	-20.517	0	0.4408	0.304	0.578	0.07	6.317	0	0.2899	0.178	0.402	0.057	5.061	0	1.1248	1.018	1.231	0.054	20.676	0	-0.1541
Bone marrow or stem cell transplant	neoplasms	2.1306	1.26	3.001	0.444	4.796	8.41992	3.52542	20.1056	53	6478	10	8343	1.6149e-06	3.23428e-05	mi_significant	0.925308	5.79185	1.418	1.219	1.617	0.101	13.971	0	-0.0495	-0.054	-0.045	0.002	-20.372	0	0.4446	0.308	0.581	0.07	6.373	0	0.2796	0.167	0.392	0.057	4.875	0	1.1197	1.013	1.226	0.054	20.567	0	-0.156
Breast disorder NOS	genitourinary	-0.8192	-3.295	1.657	1.263	-0.648	0.440784	0.037068	5.24356	10	6521	10	8343	0.516712	0.742871	not_significant	-0.355774	0.286751	1.4332	1.235	1.632	0.101	14.147	0	-0.0498	-0.055	-0.045	0.002	-20.554	0	0.4427	0.306	0.579	0.07	6.346	0	0.2908	0.179	0.403	0.057	5.077	0	1.1261	1.019	1.233	0.054	20.703	0	-0.1534
Broken tooth	injuries & poisonings	-0.5871	-2.915	1.741	1.188	-0.494	0.555937	0.054204	5.70304	10	6521	10	8343	0.621065	0.813457	not_significant	-0.254974	0.206863	1.4331	1.235	1.632	0.101	14.147	0	-0.0498	-0.055	-0.045	0.002	-20.549	0	0.4423	0.306	0.579	0.07	6.34	0	0.2902	0.178	0.402	0.057	5.067	0	1.1254	1.019	1.232	0.054	20.69	0	-0.1538
Bronchiectasis	respiratory	1.9419	0.952	2.932	0.505	3.846	6.97199	2.59089	18.7651	26	6505	10	8343	0.000120023	0.00129159	mi_significant	0.843356	3.92074	1.4279	1.229	1.627	0.101	14.086	0	-0.0498	-0.055	-0.045	0.002	-20.512	0	0.4428	0.306	0.58	0.07	6.345	0	0.2882	0.176	0.401	0.057	5.029	0	1.1263	1.02	1.233	0.054	20.698	0	-0.1548
Bronchitis	respiratory	-0.6451	-0.918	-0.373	0.139	-4.64	0.52461	0.399317	0.688665	74	6457	229	8124	3.47817e-06	6.19201e-05	con_significant	-0.280163	5.45865	1.4275	1.229	1.626	0.101	14.09	0	-0.0493	-0.054	-0.045	0.002	-20.314	0	0.429	0.292	0.566	0.07	6.144	0	0.2911	0.179	0.404	0.057	5.078	0	1.1164	1.01	1.223	0.054	20.5	0	-0.1558
Bronchopneumonia and lung abscess	respiratory	0.2031	-0.789	1.195	0.506	0.401	1.22519	0.454299	3.30356	10	6521	11	8342	0.688069	0.854604	not_significant	0.0882052	0.162368	1.4331	1.235	1.632	0.101	14.147	0	-0.0498	-0.055	-0.045	0.002	-20.555	0	0.4428	0.306	0.58	0.07	6.347	0	0.2904	0.178	0.403	0.057	5.07	0	1.126	1.019	1.233	0.054	20.702	0	-0.1536
Burns		-0.3374	-0.983	0.308	0.33	-1.024	0.713623	0.374187	1.3607	14	6517	33	8320	0.305858	0.551207	not_significant	-0.146531	0.514481	1.4331	1.235	1.632	0.101	14.144	0	-0.0498	-0.055	-0.045	0.002	-20.531	0	0.4434	0.307	0.58	0.07	6.355	0	0.2901	0.178	0.402	0.057	5.066	0	1.1242	1.018	1.231	0.054	20.661	0	-0.1543
Bursitis	musculoskeletal	-0.3232	-0.628	-0.019	0.155	-2.079	0.723829	0.533658	0.981179	64	6467	153	8200	0.0375807	0.150842	not_significant	-0.140364	1.42503	1.4282	1.23	1.627	0.101	14.096	0	-0.0495	-0.054	-0.045	0.002	-20.401	0	0.438	0.301	0.575	0.07	6.275	0	0.2878	0.176	0.4	0.057	5.024	0	1.1213	1.015	1.228	0.054	20.6	0	-0.1558
Bursitis disorders	musculoskeletal	-0.4735	-1.462	0.515	0.504	-0.939	0.622819	0.231772	1.67364	10	6521	15	8338	0.347741	0.59838	not_significant	-0.205638	0.458744	1.4333	1.235	1.632	0.101	14.147	0	-0.0498	-0.055	-0.045	0.002	-20.545	0	0.442	0.305	0.579	0.07	6.336	0	0.2901	0.178	0.402	0.057	5.066	0	1.1256	1.019	1.232	0.054	20.694	0	-0.1533
Cachexia	endocrine/metabolic	2.2323	0.912	3.553	0.674	3.313	9.32128	2.4893	34.9179	14	6517	10	8343	0.000922261	0.00796347	mi_significant	0.969476	3.03515	1.4443	1.246	1.643	0.101	14.24	0	-0.0501	-0.055	-0.045	0.002	-20.649	0	0.4425	0.306	0.579	0.07	6.343	0	0.2842	0.172	0.397	0.057	4.958	0	1.1263	1.02	1.233	0.054	20.7	0	-0.153
Calcaneal spur; Exostosis NOS	musculoskeletal	-0.2866	-0.749	0.176	0.236	-1.215	0.750812	0.472839	1.19244	28	6503	64	8289	0.224531	0.459905	not_significant	-0.124469	0.648724	1.43	1.231	1.629	0.101	14.113	0	-0.0497	-0.054	-0.045	0.002	-20.491	0	0.4433	0.307	0.58	0.07	6.355	0	0.2905	0.178	0.403	0.057	5.072	0	1.1252	1.019	1.232	0.054	20.686	0	-0.1531
Calculus of bile duct	digestive	0.1364	-0.9	1.172	0.529	0.258	1.14614	0.40657	3.22844	10	6521	10	8343	0.796394	0.915789	not_significant	0.0592378	0.0988723	1.433	1.234	1.632	0.101	14.146	0	-0.0498	-0.055	-0.045	0.002	-20.554	0	0.4428	0.306	0.58	0.07	6.348	0	0.29	0.178	0.402	0.057	5.064	0	1.1258	1.019	1.232	0.054	20.699	0	-0.1534
Calculus of kidney	genitourinary	0.1051	-0.118	0.328	0.114	0.924	1.11082	0.888696	1.38819	144	6387	216	8137	0.355716	0.607752	not_significant	0.0456444	0.448897	1.4363	1.238	1.635	0.101	14.168	0	-0.05	-0.055	-0.045	0.002	-20.564	0	0.4431	0.306	0.58	0.07	6.352	0	0.29	0.178	0.402	0.057	5.063	0	1.1274	1.021	1.234	0.054	20.716	0	-0.1531
Calculus of lower urinary tract	genitourinary	0.9032	-0.193	2	0.559	1.615	2.46749	0.824482	7.38906	10	6521	10	8343	0.106363	0.296091	not_significant	0.392255	0.97321	1.4346	1.236	1.633	0.101	14.16	0	-0.0499	-0.055	-0.045	0.002	-20.575	0	0.4426	0.306	0.579	0.07	6.344	0	0.2904	0.178	0.403	0.057	5.071	0	1.1264	1.02	1.233	0.054	20.706	0	-0.153
Calculus of ureter	genitourinary	-0.3302	-0.854	0.193	0.267	-1.236	0.71878	0.425709	1.21288	22	6509	48	8305	0.216417	0.452281	not_significant	-0.143404	0.664708	1.4328	1.234	1.631	0.101	14.143	0	-0.0498	-0.055	-0.045	0.002	-20.514	0	0.4407	0.304	0.577	0.07	6.315	0	0.2892	0.177	0.401	0.057	5.049	0	1.1237	1.017	1.23	0.054	20.651	0	-0.1554
Cancer of bladder	neoplasms	-0.4937	-2.2	1.213	0.871	-0.567	0.610364	0.110803	3.36356	10	6521	10	8343	0.57067	0.781487	not_significant	-0.214411	0.243615	1.4327	1.234	1.631	0.101	14.143	0	-0.0498	-0.055	-0.045	0.002	-20.547	0	0.4426	0.306	0.579	0.07	6.344	0	0.2906	0.178	0.403	0.057	5.073	0	1.1259	1.019	1.232	0.054	20.699	0	-0.1533
Cancer of brain	neoplasms	1.6317	0.688	2.575	0.481	3.39	5.11256	1.98973	13.1313	28	6503	10	8343	0.000699465	0.00630393	mi_significant	0.708638	3.15523	1.4301	1.231	1.629	0.101	14.111	0	-0.0498	-0.055	-0.045	0.002	-20.531	0	0.4396	0.303	0.576	0.07	6.297	0	0.289	0.177	0.401	0.057	5.045	0	1.1235	1.017	1.23	0.054	20.645	0	-0.1538
Cancer of brain and nervous system	neoplasms	0.7134	-1.25	2.676	1.002	0.712	2.04092	0.286505	14.5269	10	6521	10	8343	0.476334	0.711786	not_significant	0.309826	0.322088	1.4326	1.234	1.631	0.101	14.142	0	-0.0498	-0.055	-0.045	0.002	-20.548	0	0.4421	0.305	0.579	0.07	6.338	0	0.2902	0.178	0.402	0.057	5.068	0	1.1257	1.019	1.232	0.054	20.697	0	-0.1538
Cancer of bronchus; lung	neoplasms	0.3411	-0.955	1.637	0.661	0.516	1.40649	0.384812	5.13973	10	6521	10	8343	0.605836	0.801241	not_significant	0.148138	0.217645	1.4332	1.235	1.632	0.101	14.149	0	-0.0498	-0.055	-0.045	0.002	-20.557	0	0.4429	0.306	0.58	0.07	6.348	0	0.2903	0.178	0.403	0.057	5.07	0	1.1255	1.019	1.232	0.054	20.691	0	-0.1535
Cancer of connective tissue	neoplasms	1.7344	0.906	2.562	0.422	4.106	5.66553	2.47441	12.9617	33	6498	10	8343	4.02782e-05	0.000542815	mi_significant	0.75324	4.39493	1.4363	1.238	1.635	0.101	14.172	0	-0.05	-0.055	-0.045	0.002	-20.603	0	0.4443	0.308	0.581	0.07	6.366	0	0.285	0.173	0.397	0.057	4.974	0	1.1244	1.018	1.231	0.054	20.658	0	-0.1536
Cancer of eye	neoplasms	0.5262	-1.475	2.528	1.021	0.515	1.69249	0.228779	12.5284	10	6521	10	8343	0.606329	0.801241	not_significant	0.228526	0.217291	1.4338	1.235	1.632	0.101	14.152	0	-0.0499	-0.055	-0.045	0.002	-20.558	0	0.443	0.306	0.58	0.07	6.349	0	0.2904	0.178	0.403	0.057	5.071	0	1.126	1.019	1.233	0.054	20.701	0	-0.1534
Cancer of kidney and renal pelvis	neoplasms	0.3127	-1.022	1.647	0.681	0.459	1.36711	0.359874	5.19138	10	6521	10	8343	0.646022	0.829504	not_significant	0.135804	0.189753	1.433	1.234	1.632	0.101	14.146	0	-0.0498	-0.055	-0.045	0.002	-20.555	0	0.4424	0.306	0.579	0.07	6.341	0	0.2901	0.178	0.402	0.057	5.067	0	1.1258	1.019	1.232	0.054	20.699	0	-0.1535
Cancer of larynx, pharynx, nasal cavities	neoplasms	0.9923	-1.876	3.861	1.464	0.678	2.69743	0.153202	47.5128	10	6521	10	8343	0.49779	0.730226	not_significant	0.43095	0.302954	1.4345	1.236	1.633	0.101	14.157	0	-0.0499	-0.055	-0.045	0.002	-20.562	0	0.4421	0.305	0.579	0.07	6.338	0	0.2898	0.178	0.402	0.057	5.061	0	1.1259	1.019	1.233	0.054	20.7	0	-0.1533
Cancer of liver and intrahepatic bile duct	neoplasms	1.4412	-0.366	3.248	0.922	1.563	4.22576	0.693503	25.7388	10	6521	10	8343	0.117946	0.312643	not_significant	0.625905	0.928318	1.4367	1.238	1.635	0.101	14.176	0	-0.0499	-0.055	-0.045	0.002	-20.585	0	0.4424	0.306	0.579	0.07	6.341	0	0.2908	0.179	0.403	0.057	5.077	0	1.1257	1.019	1.232	0.054	20.694	0	-0.1533
Cancer of mouth	neoplasms	2.2448	0.04	4.45	1.125	1.995	9.43853	1.04081	85.6269	10	6521	10	8343	0.0459901	0.170483	not_significant	0.974904	1.33734	1.4381	1.239	1.637	0.101	14.188	0	-0.05	-0.055	-0.045	0.002	-20.592	0	0.4414	0.305	0.578	0.07	6.325	0	0.2895	0.177	0.402	0.057	5.054	0	1.1252	1.019	1.232	0.054	20.684	0	-0.1541
Cancer of oropharynx	neoplasms	1.8482	-0.663	4.359	1.281	1.443	6.34838	0.515303	78.1789	10	6521	10	8343	0.149151	0.361471	not_significant	0.802663	0.826375	1.4381	1.239	1.637	0.101	14.186	0	-0.05	-0.055	-0.045	0.002	-20.588	0	0.4416	0.305	0.578	0.07	6.329	0	0.2903	0.178	0.403	0.057	5.069	0	1.1256	1.019	1.232	0.054	20.693	0	-0.1535
Cancer of other endocrine glands	neoplasms	0.4757	-0.384	1.335	0.438	1.085	1.60914	0.681131	3.8	15	6516	11	8342	0.277862	0.517267	not_significant	0.206594	0.556171	1.4326	1.234	1.631	0.101	14.14	0	-0.0498	-0.055	-0.045	0.002	-20.549	0	0.4424	0.306	0.579	0.07	6.341	0	0.2898	0.178	0.402	0.057	5.061	0	1.1253	1.019	1.232	0.054	20.688	0	-0.1539
Cancer of other lymphoid, histiocytic tissue	neoplasms	0.8214	-0.418	2.06	0.632	1.299	2.27368	0.658362	7.84597	10	6521	10	8343	0.193796	0.426812	not_significant	0.356729	0.712656	1.4346	1.236	1.633	0.101	14.16	0	-0.0499	-0.055	-0.045	0.002	-20.574	0	0.4431	0.306	0.58	0.07	6.351	0	0.2908	0.179	0.403	0.057	5.078	0	1.1259	1.019	1.233	0.054	20.7	0	-0.1529
Cancer of prostate	neoplasms	1.3075	0.764	1.851	0.277	4.714	3.69692	2.14685	6.36618	35	6496	28	8325	2.42386e-06	4.53924e-05	mi_significant	0.56784	5.61549	1.4983	1.298	1.699	0.102	14.646	0	-0.0516	-0.056	-0.047	0.002	-21.005	0	0.4347	0.298	0.572	0.07	6.227	0	0.289	0.177	0.401	0.057	5.043	0	1.1228	1.016	1.229	0.054	20.625	0	-0.1538
Cancer of stomach	neoplasms	1.4204	-0.896	3.737	1.182	1.202	4.13878	0.408199	41.9719	10	6521	10	8343	0.229394	0.465896	not_significant	0.616872	0.639418	1.4336	1.235	1.632	0.101	14.151	0	-0.0498	-0.055	-0.045	0.002	-20.557	0	0.4427	0.306	0.579	0.07	6.347	0	0.2891	0.177	0.401	0.057	5.048	0	1.1255	1.019	1.232	0.054	20.693	0	-0.1537
Cancer of tongue	neoplasms	0.9119	-0.939	2.763	0.944	0.966	2.48905	0.391019	15.8473	10	6521	10	8343	0.334195	0.585496	not_significant	0.396033	0.476	1.436	1.237	1.635	0.101	14.169	0	-0.0499	-0.055	-0.045	0.002	-20.573	0	0.4423	0.306	0.579	0.07	6.339	0	0.29	0.178	0.402	0.057	5.063	0	1.126	1.019	1.233	0.054	20.701	0	-0.1538
Cancer within the respiratory system	neoplasms	-0.7117	-3.231	1.808	1.285	-0.554	0.490809	0.039518	6.09824	10	6521	10	8343	0.579817	0.78877	not_significant	-0.309087	0.236709	1.4322	1.234	1.631	0.101	14.137	0	-0.0498	-0.055	-0.045	0.002	-20.543	0	0.4431	0.306	0.58	0.07	6.351	0	0.2902	0.178	0.402	0.057	5.067	0	1.1262	1.02	1.233	0.054	20.705	0	-0.1534
Cancer, suspected or other	neoplasms	1.1555	0.34	1.971	0.416	2.777	3.17561	1.40495	7.17785	21	6510	11	8342	0.00548339	0.0332229	mi_significant	0.501827	2.26095	1.4431	1.244	1.642	0.101	14.239	0	-0.0501	-0.055	-0.045	0.002	-20.654	0	0.4419	0.305	0.579	0.07	6.334	0	0.2863	0.174	0.399	0.057	4.997	0	1.1246	1.018	1.231	0.054	20.67	0	-0.1529
Candidiasis	infectious diseases	0.1244	-0.301	0.55	0.217	0.573	1.13247	0.740078	1.73325	44	6487	52	8301	0.566471	0.780183	not_significant	0.0540262	0.246822	1.4325	1.234	1.631	0.101	14.142	0	-0.0498	-0.055	-0.045	0.002	-20.558	0	0.4431	0.306	0.58	0.07	6.352	0	0.2901	0.178	0.402	0.057	5.065	0	1.126	1.019	1.233	0.054	20.701	0	-0.1531
Candidiasis of skin and nails	infectious diseases	0.1498	-0.879	1.178	0.525	0.285	1.1616	0.415198	3.24787	10	6521	10	8343	0.775269	0.900184	not_significant	0.0650573	0.110548	1.4329	1.234	1.631	0.101	14.145	0	-0.0498	-0.055	-0.045	0.002	-20.554	0	0.4428	0.306	0.58	0.07	6.348	0	0.29	0.178	0.402	0.057	5.064	0	1.126	1.019	1.233	0.054	20.701	0	-0.1533
Carbuncle and furuncle	dermatologic	-0.3399	-0.901	0.221	0.286	-1.187	0.711842	0.406163	1.24732	18	6513	46	8307	0.235249	0.472464	not_significant	-0.147617	0.628472	1.4333	1.235	1.632	0.101	14.149	0	-0.0498	-0.055	-0.045	0.002	-20.528	0	0.4406	0.304	0.577	0.07	6.314	0	0.2887	0.176	0.401	0.057	5.04	0	1.1239	1.017	1.231	0.054	20.653	0	-0.1538
Carcinoma in situ of skin	neoplasms	0.5184	-0.704	1.741	0.624	0.831	1.67934	0.494603	5.70304	10	6521	10	8343	0.406001	0.65751	not_significant	0.225138	0.391472	1.4352	1.237	1.634	0.101	14.162	0	-0.0499	-0.055	-0.045	0.002	-20.568	0	0.4429	0.306	0.58	0.07	6.349	0	0.2894	0.177	0.402	0.057	5.052	0	1.126	1.019	1.233	0.054	20.701	0	-0.1536
Cardiac and circulatory congenital anomalies	congenital anomalies	0.1913	-0.558	0.941	0.382	0.5	1.21082	0.572353	2.56254	14	6517	16	8337	0.616752	0.811456	not_significant	0.0830805	0.20989	1.4331	1.235	1.632	0.101	14.147	0	-0.0498	-0.055	-0.045	0.002	-20.555	0	0.443	0.306	0.58	0.07	6.349	0	0.29	0.178	0.402	0.057	5.063	0	1.1256	1.019	1.232	0.054	20.695	0	-0.1537
Cardiac arrest	circulatory system	2.0472	0.47	3.624	0.805	2.544	7.74618	1.59999	37.4872	10	6521	10	8343	0.0109485	0.05741	not_significant	0.889088	1.96064	1.4343	1.236	1.633	0.101	14.152	0	-0.0499	-0.055	-0.045	0.002	-20.578	0	0.4437	0.307	0.58	0.07	6.358	0	0.2912	0.179	0.404	0.057	5.084	0	1.1276	1.021	1.234	0.054	20.723	0	-0.1523
Cardiac complications, not elsewhere classified	circulatory system	0.2887	-1.37	1.948	0.846	0.341	1.33469	0.254107	7.01464	10	6521	10	8343	0.733017	0.88305	not_significant	0.125381	0.134886	1.4334	1.235	1.632	0.101	14.15	0	-0.0498	-0.055	-0.045	0.002	-20.558	0	0.4428	0.306	0.579	0.07	6.347	0	0.2902	0.178	0.402	0.057	5.068	0	1.1258	1.019	1.232	0.054	20.699	0	-0.1533
Cardiac conduction disorders	circulatory system	-0.159	-1.932	1.614	0.905	-0.176	0.852996	0.144858	5.02286	10	6521	10	8343	0.860475	0.938446	not_significant	-0.0690528	0.0652618	1.433	1.234	1.632	0.101	14.146	0	-0.0498	-0.055	-0.045	0.002	-20.55	0	0.4426	0.306	0.579	0.07	6.343	0	0.29	0.178	0.402	0.057	5.064	0	1.1257	1.019	1.232	0.054	20.696	0	-0.1535
Cardiac congenital anomalies	congenital anomalies	-0.1216	-1.028	0.785	0.462	-0.263	0.885502	0.357722	2.19241	10	6521	14	8339	0.792608	0.912874	not_significant	-0.0528102	0.100942	1.4332	1.235	1.632	0.101	14.147	0	-0.0498	-0.055	-0.045	0.002	-20.552	0	0.4426	0.306	0.579	0.07	6.344	0	0.2902	0.178	0.402	0.057	5.067	0	1.1257	1.019	1.232	0.054	20.696	0	-0.1534
Cardiac defibrillator in situ	circulatory system	-0.5431	-1.942	0.856	0.714	-0.761	0.580945	0.143417	2.35373	10	6521	10	8343	0.446732	0.689289	not_significant	-0.235865	0.349953	1.4319	1.233	1.63	0.101	14.133	0	-0.0498	-0.055	-0.045	0.002	-20.532	0	0.4423	0.306	0.579	0.07	6.341	0	0.2908	0.179	0.403	0.057	5.078	0	1.1258	1.019	1.232	0.054	20.698	0	-0.1537
Cardiac pacemaker in situ	circulatory system	0.6348	-0.759	2.028	0.711	0.893	1.88664	0.468134	7.59887	10	6521	10	8343	0.372026	0.625976	not_significant	0.27569	0.429427	1.4344	1.236	1.633	0.101	14.159	0	-0.0499	-0.055	-0.045	0.002	-20.57	0	0.4432	0.306	0.58	0.07	6.353	0	0.2908	0.179	0.403	0.057	5.077	0	1.1265	1.02	1.233	0.054	20.708	0	-0.1529
Cardiac pacemaker/device in situ	circulatory system	2.344	0.131	4.557	1.129	2.076	10.4228	1.13997	95.2972	10	6521	10	8343	0.0379114	0.151017	not_significant	1.01799	1.42123	1.439	1.24	1.638	0.101	14.196	0	-0.05	-0.055	-0.045	0.002	-20.607	0	0.4407	0.304	0.577	0.07	6.315	0	0.2897	0.177	0.402	0.057	5.057	0	1.1265	1.02	1.233	0.054	20.708	0	-0.1522
Cardiac shunt/ heart septal defect	congenital anomalies	-0.1441	-0.869	0.581	0.37	-0.389	0.865801	0.419371	1.78783	13	6518	22	8331	0.696915	0.858199	not_significant	-0.0625818	0.15682	1.4333	1.235	1.632	0.101	14.148	0	-0.0498	-0.055	-0.045	0.002	-20.552	0	0.4424	0.306	0.579	0.07	6.342	0	0.2902	0.178	0.402	0.057	5.068	0	1.1258	1.019	1.232	0.054	20.699	0	-0.1532
Cardiogenic shock	symptoms	1.1744	-0.331	2.679	0.768	1.529	3.2362	0.718205	14.5705	10	6521	10	8343	0.126154	0.327183	not_significant	0.510035	0.8991	1.4357	1.237	1.634	0.101	14.172	0	-0.0499	-0.055	-0.045	0.002	-20.581	0	0.4419	0.305	0.579	0.07	6.334	0	0.2877	0.175	0.4	0.057	5.021	0	1.126	1.019	1.233	0.054	20.701	0	-0.1535
Cardiomegaly	circulatory system	0.4781	0.086	0.87	0.2	2.391	1.61301	1.08981	2.38691	52	6479	59	8294	0.0168186	0.080306	not_significant	0.207636	1.77421	1.4392	1.241	1.638	0.101	14.202	0	-0.0501	-0.055	-0.045	0.002	-20.648	0	0.4446	0.308	0.581	0.07	6.372	0	0.2917	0.179	0.404	0.057	5.093	0	1.1306	1.024	1.237	0.054	20.766	0	-0.15
Cataplexy and narcolepsy	neurological	1.1348	-0.327	2.597	0.746	1.521	3.11055	0.721084	13.4234	10	6521	10	8343	0.128179	0.33006	not_significant	0.492837	0.892184	1.4326	1.234	1.631	0.101	14.141	0	-0.0498	-0.055	-0.045	0.002	-20.552	0	0.4431	0.306	0.58	0.07	6.352	0	0.2901	0.178	0.402	0.057	5.067	0	1.1258	1.019	1.232	0.054	20.698	0	-0.1543
Cataract	sense organs	1.0444	0.587	1.502	0.233	4.479	2.84169	1.79858	4.49066	42	6489	46	8307	7.50843e-06	0.000125897	mi_significant	0.453577	5.12445	1.4868	1.287	1.687	0.102	14.573	0	-0.0514	-0.056	-0.047	0.002	-20.973	0	0.4329	0.296	0.57	0.07	6.202	0	0.2943	0.182	0.407	0.057	5.134	0	1.1322	1.025	1.239	0.054	20.791	0	-0.1496
Celiac disease	digestive	-1.2609	-2.1	-0.422	0.428	-2.945	0.283399	0.122456	0.655734	10	6521	32	8321	0.00323427	0.0225305	con_significant	-0.547602	2.49022	1.4375	1.239	1.636	0.101	14.185	0	-0.0498	-0.055	-0.045	0.002	-20.545	0	0.441	0.304	0.578	0.07	6.318	0	0.2865	0.174	0.399	0.057	5	0	1.1237	1.017	1.23	0.054	20.65	0	-0.1559
Cellulitis and abscess of arm/hand	dermatologic	-0.0155	-0.487	0.456	0.241	-0.064	0.98462	0.614467	1.57775	28	6503	51	8302	0.948581	0.979137	not_significant	-0.00673156	0.0229256	1.433	1.234	1.632	0.101	14.146	0	-0.0498	-0.055	-0.045	0.002	-20.547	0	0.4426	0.306	0.579	0.07	6.344	0	0.2901	0.178	0.402	0.057	5.064	0	1.1257	1.019	1.232	0.054	20.682	0	-0.1534
Cellulitis and abscess of face/neck	dermatologic	-0.2092	-0.758	0.34	0.28	-0.747	0.811233	0.468603	1.40495	21	6510	43	8310	0.454943	0.692013	not_significant	-0.0908544	0.342043	1.4321	1.234	1.631	0.101	14.137	0	-0.0498	-0.055	-0.045	0.002	-20.528	0	0.4424	0.306	0.579	0.07	6.342	0	0.2897	0.177	0.402	0.057	5.059	0	1.1255	1.019	1.232	0.054	20.691	0	-0.1532
Cellulitis and abscess of fingers/toes	dermatologic	-0.0535	-0.38	0.273	0.167	-0.321	0.947906	0.683861	1.3139	62	6469	107	8246	0.748228	0.892124	not_significant	-0.0232348	0.125966	1.4334	1.235	1.632	0.101	14.149	0	-0.0498	-0.055	-0.045	0.002	-20.541	0	0.4419	0.305	0.579	0.07	6.329	0	0.2897	0.177	0.402	0.057	5.057	0	1.125	1.018	1.232	0.054	20.66	0	-0.1538
Cellulitis and abscess of foot, toe	dermatologic	0.3463	-0.669	1.361	0.518	0.669	1.41383	0.512221	3.90009	10	6521	10	8343	0.503659	0.733417	not_significant	0.150396	0.297863	1.4336	1.235	1.632	0.101	14.151	0	-0.0499	-0.055	-0.045	0.002	-20.559	0	0.4423	0.306	0.579	0.07	6.34	0	0.2891	0.177	0.401	0.057	5.047	0	1.1258	1.019	1.232	0.054	20.698	0	-0.1534
Cellulitis and abscess of leg, except foot	dermatologic	-0.086	-0.486	0.314	0.204	-0.421	0.917594	0.615082	1.36889	40	6491	74	8279	0.673567	0.849781	not_significant	-0.0373493	0.171619	1.4326	1.234	1.631	0.101	14.142	0	-0.0498	-0.055	-0.045	0.002	-20.533	0	0.4423	0.306	0.579	0.07	6.34	0	0.2903	0.178	0.402	0.057	5.068	0	1.1253	1.019	1.232	0.054	20.683	0	-0.1534
Cellulitis and abscess of oral soft tissues	digestive	-0.7063	-1.923	0.511	0.621	-1.137	0.493467	0.146168	1.66696	10	6521	11	8342	0.255417	0.497718	not_significant	-0.306742	0.592751	1.4319	1.233	1.63	0.101	14.133	0	-0.0498	-0.055	-0.045	0.002	-20.532	0	0.4428	0.306	0.58	0.07	6.347	0	0.2906	0.178	0.403	0.057	5.075	0	1.1263	1.02	1.233	0.054	20.706	0	-0.1534
Cellulitis and abscess of trunk	dermatologic	0.0749	-0.39	0.54	0.237	0.316	1.07778	0.677057	1.71601	35	6496	45	8308	0.75219	0.892722	not_significant	0.0325287	0.123673	1.4326	1.234	1.631	0.101	14.142	0	-0.0498	-0.055	-0.045	0.002	-20.553	0	0.4426	0.306	0.579	0.07	6.345	0	0.2901	0.178	0.402	0.057	5.067	0	1.1259	1.019	1.233	0.054	20.701	0	-0.1534
Central origin vertigo	sense organs	-1.2119	-3.41	0.987	1.122	-1.08	0.297631	0.0330412	2.68317	10	6521	10	8343	0.279949	0.518307	not_significant	-0.526321	0.552921	1.4314	1.233	1.63	0.101	14.126	0	-0.0498	-0.055	-0.045	0.002	-20.521	0	0.4428	0.306	0.58	0.07	6.346	0	0.2894	0.177	0.402	0.057	5.053	0	1.1257	1.019	1.232	0.054	20.695	0	-0.1542
Central/nonobstroctive sleep apnea	neurological	0.7733	0.148	1.399	0.319	2.423	2.16691	1.15951	4.05115	22	6509	21	8332	0.0153879	0.074212	not_significant	0.33584	1.81282	1.4424	1.244	1.641	0.101	14.224	0	-0.0501	-0.055	-0.045	0.002	-20.635	0	0.4421	0.305	0.579	0.07	6.337	0	0.2882	0.176	0.4	0.057	5.03	0	1.1264	1.02	1.233	0.054	20.706	0	-0.1549
Cerebral aneurysm	circulatory system	0.2839	-1.171	1.739	0.742	0.382	1.3283	0.310057	5.69165	10	6521	10	8343	0.702101	0.863111	not_significant	0.123296	0.1536	1.4334	1.235	1.632	0.101	14.149	0	-0.0498	-0.055	-0.045	0.002	-20.555	0	0.4426	0.306	0.579	0.07	6.345	0	0.2902	0.178	0.402	0.057	5.068	0	1.126	1.019	1.233	0.054	20.701	0	-0.1535
Cerebral artery occlusion, with cerebral infarction	circulatory system	1.015	0.274	1.756	0.378	2.683	2.75936	1.31521	5.78923	20	6511	14	8339	0.00729136	0.0413942	mi_significant	0.440809	2.13719	1.4452	1.246	1.644	0.101	14.246	0	-0.0502	-0.055	-0.045	0.002	-20.66	0	0.4407	0.304	0.577	0.07	6.317	0	0.2898	0.178	0.402	0.057	5.059	0	1.126	1.019	1.233	0.054	20.698	0	-0.1529
Cerebral cysts	neurological	-0.3039	-1.311	0.704	0.514	-0.591	0.737935	0.26955	2.02182	10	6521	10	8343	0.554408	0.770931	not_significant	-0.131982	0.256171	1.4336	1.235	1.632	0.101	14.151	0	-0.0498	-0.055	-0.045	0.002	-20.556	0	0.4425	0.306	0.579	0.07	6.344	0	0.2904	0.178	0.403	0.057	5.07	0	1.1262	1.02	1.233	0.054	20.704	0	-0.1532
Cerebral degeneration, unspecified	neurological	0.3173	-1.683	2.318	1.021	0.311	1.37341	0.185816	10.1553	10	6521	10	8343	0.755937	0.894226	not_significant	0.137802	0.121514	1.433	1.234	1.632	0.101	14.146	0	-0.0498	-0.055	-0.045	0.002	-20.552	0	0.4425	0.306	0.579	0.07	6.342	0	0.2899	0.178	0.402	0.057	5.063	0	1.1258	1.019	1.232	0.054	20.699	0	-0.1534
Cerebral edema and compression of brain	neurological	1.4225	0.46	2.385	0.491	2.897	4.14748	1.58407	10.8591	20	6511	10	8343	0.00376442	0.0246741	mi_significant	0.617784	2.4243	1.4275	1.229	1.626	0.101	14.089	0	-0.0497	-0.054	-0.045	0.002	-20.514	0	0.441	0.304	0.578	0.07	6.318	0	0.2903	0.178	0.403	0.057	5.068	0	1.1263	1.02	1.233	0.054	20.702	0	-0.154
Cerebral ischemia	circulatory system	0.5778	-1.503	2.659	1.062	0.544	1.78211	0.222462	14.282	10	6521	10	8343	0.586279	0.793765	not_significant	0.250935	0.231896	1.4336	1.235	1.632	0.101	14.151	0	-0.0498	-0.055	-0.045	0.002	-20.558	0	0.4424	0.306	0.579	0.07	6.342	0	0.2902	0.178	0.402	0.057	5.068	0	1.1257	1.019	1.232	0.054	20.696	0	-0.1536
Cerebrovascular disease	circulatory system	0.5128	-0.787	1.813	0.663	0.773	1.66996	0.455208	6.12881	10	6521	10	8343	0.439441	0.684529	not_significant	0.222706	0.357099	1.4335	1.235	1.632	0.101	14.151	0	-0.0498	-0.055	-0.045	0.002	-20.56	0	0.4417	0.305	0.578	0.07	6.331	0	0.2901	0.178	0.402	0.057	5.066	0	1.1258	1.019	1.232	0.054	20.699	0	-0.1537
Certain early complications of trauma or procedure	injuries & poisonings	-0.2078	-1.351	0.936	0.583	-0.356	0.812369	0.258981	2.54976	10	6521	10	8343	0.72175	0.876064	not_significant	-0.0902464	0.141613	1.4337	1.235	1.632	0.101	14.15	0	-0.0498	-0.055	-0.045	0.002	-20.555	0	0.4423	0.306	0.579	0.07	6.339	0	0.2898	0.178	0.402	0.057	5.06	0	1.1255	1.019	1.232	0.054	20.69	0	-0.1537
Cervical radiculitis	symptoms	-0.0989	-0.382	0.184	0.144	-0.686	0.905833	0.682495	1.20202	81	6450	155	8198	0.492909	0.726763	not_significant	-0.0429517	0.307234	1.4299	1.231	1.629	0.101	14.103	0	-0.0497	-0.054	-0.045	0.002	-20.456	0	0.4419	0.305	0.579	0.07	6.334	0	0.2908	0.179	0.403	0.057	5.078	0	1.1252	1.019	1.232	0.054	20.684	0	-0.1534
Cervicalgia	symptoms	-0.2	-0.361	-0.039	0.082	-2.428	0.818731	0.696979	0.961751	257	6274	485	7868	0.0151703	0.073408	not_significant	-0.0868589	1.81901	1.4308	1.232	1.629	0.101	14.121	0	-0.0495	-0.054	-0.045	0.002	-20.37	0	0.4374	0.301	0.574	0.07	6.266	0	0.2894	0.177	0.402	0.057	5.052	0	1.1202	1.013	1.227	0.054	20.576	0	-0.1546
Changes in skin texture	dermatologic	0.3222	-0.486	1.13	0.412	0.782	1.38016	0.615082	3.09566	12	6519	14	8339	0.434398	0.680872	not_significant	0.13993	0.362112	1.4322	1.234	1.631	0.101	14.138	0	-0.0498	-0.055	-0.045	0.002	-20.553	0	0.4432	0.306	0.58	0.07	6.353	0	0.2903	0.178	0.403	0.057	5.069	0	1.1264	1.02	1.233	0.054	20.707	0	-0.1534
Chemotherapy	neoplasms	1.0629	0.728	1.398	0.171	6.215	2.89475	2.07093	4.0471	139	6392	55	8298	5.14695e-10	2.47396e-08	mi_significant	0.461612	9.28845	1.4193	1.221	1.618	0.101	14.006	0	-0.0497	-0.054	-0.045	0.002	-20.481	0	0.439	0.302	0.576	0.07	6.289	0	0.276	0.163	0.388	0.057	4.809	0	1.1173	1.01	1.224	0.054	20.511	0	-0.1553
Cholangitis	digestive	-0.6131	-2.027	0.801	0.722	-0.85	0.541669	0.13173	2.22777	10	6521	10	8343	0.395534	0.649322	not_significant	-0.266266	0.402817	1.4338	1.235	1.632	0.101	14.152	0	-0.0498	-0.055	-0.045	0.002	-20.557	0	0.4425	0.306	0.579	0.07	6.343	0	0.2909	0.179	0.403	0.057	5.079	0	1.126	1.019	1.233	0.054	20.702	0	-0.1533
Cholecystitis without cholelithiasis	digestive	0.3508	-0.563	1.264	0.466	0.753	1.4202	0.569498	3.53955	10	6521	12	8341	0.451621	0.68987	not_significant	0.152351	0.345226	1.4334	1.235	1.632	0.101	14.149	0	-0.0499	-0.055	-0.045	0.002	-20.563	0	0.4435	0.307	0.58	0.07	6.357	0	0.2909	0.179	0.403	0.057	5.079	0	1.1268	1.02	1.233	0.054	20.71	0	-0.1528
Cholelithiasis	digestive	0.0805	-0.331	0.492	0.21	0.384	1.08383	0.718205	1.63558	41	6490	63	8290	0.701229	0.862775	not_significant	0.0349607	0.15414	1.4338	1.235	1.632	0.101	14.151	0	-0.0499	-0.055	-0.045	0.002	-20.549	0	0.4427	0.306	0.579	0.07	6.345	0	0.2904	0.178	0.403	0.057	5.071	0	1.1263	1.02	1.233	0.054	20.702	0	-0.153
Cholelithiasis with acute cholecystitis	digestive	0.1162	-1.587	1.82	0.869	0.134	1.12322	0.204538	6.17186	10	6521	10	8343	0.893622	0.956647	not_significant	0.050465	0.0488459	1.4331	1.235	1.632	0.101	14.147	0	-0.0498	-0.055	-0.045	0.002	-20.551	0	0.4428	0.306	0.58	0.07	6.348	0	0.2903	0.178	0.403	0.057	5.069	0	1.126	1.019	1.233	0.054	20.698	0	-0.1533
Cholelithiasis with other cholecystitis	digestive	-0.1807	-1.239	0.878	0.54	-0.335	0.834686	0.289674	2.40608	10	6521	13	8340	0.737973	0.886059	not_significant	-0.078477	0.13196	1.4326	1.234	1.631	0.101	14.141	0	-0.0498	-0.055	-0.045	0.002	-20.539	0	0.4423	0.306	0.579	0.07	6.34	0	0.29	0.178	0.402	0.057	5.063	0	1.1255	1.019	1.232	0.054	20.69	0	-0.1535
Cholesteatoma	sense organs	0.0699	-1.144	1.284	0.62	0.113	1.0724	0.318542	3.61106	10	6521	10	8343	0.910209	0.96456	not_significant	0.0303572	0.0408588	1.4328	1.234	1.631	0.101	14.143	0	-0.0498	-0.055	-0.045	0.002	-20.552	0	0.4428	0.306	0.579	0.07	6.347	0	0.2903	0.178	0.403	0.057	5.069	0	1.1259	1.019	1.233	0.054	20.699	0	-0.1533
Cholesterolosis of gallbladder	digestive	0.129	-0.568	0.826	0.356	0.363	1.13769	0.566658	2.28416	15	6516	20	8333	0.716744	0.872254	not_significant	0.056024	0.144636	1.4327	1.234	1.631	0.101	14.143	0	-0.0498	-0.055	-0.045	0.002	-20.554	0	0.4432	0.306	0.58	0.07	6.352	0	0.2905	0.178	0.403	0.057	5.073	0	1.1262	1.02	1.233	0.054	20.702	0	-0.1532
Chondrocalcinosis	endocrine/metabolic	-0.2777	-1.482	0.926	0.614	-0.452	0.757524	0.227183	2.52439	10	6521	10	8343	0.651237	0.834	not_significant	-0.120604	0.186261	1.4323	1.234	1.631	0.101	14.138	0	-0.0498	-0.055	-0.045	0.002	-20.534	0	0.4423	0.306	0.579	0.07	6.34	0	0.2899	0.178	0.402	0.057	5.062	0	1.1256	1.019	1.232	0.054	20.693	0	-0.1538
Chondromalacia		0.2377	-0.946	1.421	0.604	0.394	1.26833	0.388291	4.14126	10	6521	10	8343	0.693843	0.855878	not_significant	0.103232	0.158739	1.4331	1.235	1.632	0.101	14.147	0	-0.0498	-0.055	-0.045	0.002	-20.556	0	0.443	0.306	0.58	0.07	6.351	0	0.2907	0.178	0.403	0.057	5.075	0	1.1263	1.02	1.233	0.054	20.702	0	-0.1531
Chorioretinal inflammations, scars, and other disorders of choroid	sense organs	0.054	-1.889	1.997	0.991	0.054	1.05548	0.151223	7.36692	10	6521	10	8343	0.956547	0.982321	not_significant	0.0234519	0.0192936	1.433	1.234	1.632	0.101	14.146	0	-0.0498	-0.055	-0.045	0.002	-20.553	0	0.4427	0.306	0.579	0.07	6.346	0	0.2902	0.178	0.402	0.057	5.068	0	1.1258	1.019	1.232	0.054	20.699	0	-0.1534
Chorioretinal scars	sense organs	-0.5091	-1.856	0.838	0.687	-0.741	0.601036	0.156297	2.31174	10	6521	10	8343	0.458733	0.696309	not_significant	-0.221099	0.33844	1.4332	1.235	1.632	0.101	14.148	0	-0.0498	-0.055	-0.045	0.002	-20.545	0	0.4434	0.307	0.58	0.07	6.354	0	0.2895	0.177	0.402	0.057	5.055	0	1.125	1.018	1.232	0.054	20.679	0	-0.1541
Chromosomal anomalies	congenital anomalies	2.6591	1.963	3.355	0.355	7.484	14.2834	7.12066	28.6456	103	6428	10	8343	7.21701e-14	6.93795e-12	mi_significant	1.15483	13.1416	1.3832	1.184	1.583	0.102	13.583	0	-0.0488	-0.054	-0.044	0.002	-20.013	0	0.4367	0.3	0.574	0.07	6.243	0	0.2888	0.176	0.401	0.057	5.032	0	1.1252	1.018	1.232	0.054	20.652	0	-0.169
Chromosomal anomalies and genetic disorders	congenital anomalies	0.0536	-1.572	1.679	0.829	0.065	1.05506	0.20763	5.36019	10	6521	10	8343	0.94848	0.979137	not_significant	0.0232782	0.0229719	1.4329	1.234	1.631	0.101	14.143	0	-0.0498	-0.055	-0.045	0.002	-20.549	0	0.4427	0.306	0.579	0.07	6.347	0	0.2902	0.178	0.402	0.057	5.067	0	1.1258	1.019	1.232	0.054	20.699	0	-0.1534
Chronic airway obstruction	respiratory	0.7617	0.068	1.455	0.354	2.152	2.14191	1.07037	4.28448	18	6513	19	8334	0.0313654	0.133814	not_significant	0.330802	1.50355	1.4427	1.244	1.641	0.101	14.227	0	-0.0501	-0.055	-0.045	0.002	-20.64	0	0.4414	0.305	0.578	0.07	6.327	0	0.29	0.178	0.402	0.057	5.064	0	1.1269	1.02	1.233	0.054	20.715	0	-0.1536
Chronic bronchitis	respiratory	0.7399	-0.154	1.634	0.456	1.623	2.09573	0.857272	5.12433	10	6521	10	8343	0.104694	0.293143	not_significant	0.321334	0.980078	1.4362	1.238	1.635	0.101	14.174	0	-0.0499	-0.055	-0.045	0.002	-20.587	0	0.4432	0.306	0.58	0.07	6.353	0	0.2902	0.178	0.402	0.057	5.067	0	1.1264	1.02	1.233	0.054	20.708	0	-0.1543
Chronic dermatitis due to solar radiation	dermatologic	-0.8513	-1.178	-0.525	0.166	-5.115	0.42686	0.307894	0.591555	49	6482	177	8176	3.14515e-07	7.55885e-06	con_significant	-0.369715	6.50236	1.4172	1.219	1.616	0.101	13.985	0	-0.0492	-0.054	-0.044	0.002	-20.282	0	0.4381	0.301	0.575	0.07	6.279	0	0.3216	0.209	0.435	0.058	5.578	0	1.1189	1.012	1.226	0.054	20.563	0	-0.1564
Chronic fatigue syndrome	symptoms	0.4707	0.031	0.91	0.224	2.099	1.60111	1.03149	2.48432	41	6490	46	8307	0.0358222	0.146749	not_significant	0.204422	1.44585	1.4342	1.236	1.633	0.101	14.156	0	-0.0499	-0.055	-0.045	0.002	-20.587	0	0.4429	0.306	0.58	0.07	6.348	0	0.2904	0.178	0.403	0.057	5.071	0	1.1279	1.021	1.235	0.054	20.732	0	-0.155
Chronic glomerulonephritis, NOS	genitourinary	1.5523	-0.618	3.722	1.107	1.402	4.72232	0.539021	41.347	10	6521	10	8343	0.160893	0.380966	not_significant	0.674155	0.793462	1.4306	1.232	1.629	0.101	14.119	0	-0.0498	-0.055	-0.045	0.002	-20.53	0	0.4422	0.305	0.579	0.07	6.338	0	0.2895	0.177	0.402	0.057	5.054	0	1.1255	1.019	1.232	0.054	20.69	0	-0.153
Chronic graft-versus-host disease	infectious diseases	1.898	-0.233	4.029	1.087	1.746	6.67254	0.792154	56.2047	10	6521	10	8343	0.0808621	0.249152	not_significant	0.824291	1.09226	1.4311	1.232	1.63	0.101	14.122	0	-0.0498	-0.055	-0.045	0.002	-20.531	0	0.4434	0.307	0.58	0.07	6.356	0	0.2901	0.178	0.402	0.057	5.066	0	1.1239	1.017	1.23	0.054	20.656	0	-0.1527
Chronic hepatitis	infectious diseases	0.9024	-0.561	2.366	0.747	1.208	2.46551	0.570638	10.6547	10	6521	10	8343	0.226885	0.46222	not_significant	0.391907	0.644194	1.4344	1.236	1.633	0.101	14.159	0	-0.0499	-0.055	-0.045	0.002	-20.571	0	0.4434	0.307	0.58	0.07	6.356	0	0.2902	0.178	0.402	0.057	5.066	0	1.1266	1.02	1.233	0.054	20.711	0	-0.1534
Chronic interstitial cystitis	genitourinary	1.0998	-0.552	2.751	0.843	1.305	3.00357	0.575797	15.6583	10	6521	10	8343	0.191795	0.42659	not_significant	0.477637	0.717163	1.432	1.233	1.631	0.101	14.136	0	-0.0498	-0.055	-0.045	0.002	-20.542	0	0.4427	0.306	0.579	0.07	6.346	0	0.2877	0.175	0.4	0.057	5.02	0	1.1258	1.019	1.232	0.054	20.699	0	-0.1537
Chronic kidney disease, Stage I or II	genitourinary	0.4905	0.069	0.912	0.215	2.279	1.63313	1.07144	2.4893	46	6485	52	8301	0.0226935	0.103231	not_significant	0.213021	1.6441	1.4415	1.243	1.64	0.101	14.216	0	-0.0501	-0.055	-0.045	0.002	-20.627	0	0.4421	0.305	0.579	0.07	6.336	0	0.2882	0.176	0.4	0.057	5.031	0	1.1258	1.019	1.232	0.054	20.696	0	-0.1564
Chronic Kidney Disease, Stage III	genitourinary	1.2633	0.779	1.747	0.247	5.117	3.53707	2.17929	5.73736	49	6482	31	8322	3.10916e-07	7.55885e-06	mi_significant	0.548644	6.50736	1.467	1.268	1.666	0.102	14.436	0	-0.0509	-0.056	-0.046	0.002	-20.882	0	0.4427	0.306	0.58	0.07	6.339	0	0.2851	0.173	0.397	0.057	4.973	0	1.1303	1.024	1.237	0.054	20.762	0	-0.1521
Chronic Kidney Disease, Stage IV	genitourinary	1.6525	0.614	2.691	0.53	3.119	5.22001	1.84781	14.7464	19	6512	10	8343	0.00181588	0.0138545	mi_significant	0.717672	2.74091	1.4353	1.237	1.634	0.101	14.156	0	-0.05	-0.055	-0.045	0.002	-20.588	0	0.4437	0.307	0.58	0.07	6.357	0	0.2907	0.178	0.403	0.057	5.075	0	1.1261	1.019	1.233	0.054	20.695	0	-0.1516
Chronic laryngitis	respiratory	0.2079	-1.31	1.726	0.774	0.268	1.23109	0.26982	5.61814	10	6521	10	8343	0.788356	0.911145	not_significant	0.0902898	0.103278	1.4331	1.235	1.632	0.101	14.147	0	-0.0498	-0.055	-0.045	0.002	-20.554	0	0.4429	0.306	0.58	0.07	6.348	0	0.2904	0.178	0.403	0.057	5.07	0	1.126	1.019	1.233	0.054	20.701	0	-0.1534
Chronic lymphocytic thyroiditis	endocrine/metabolic	-0.0849	-0.687	0.518	0.307	-0.276	0.918604	0.503083	1.67867	17	6514	34	8319	0.782563	0.907283	not_significant	-0.0368716	0.10648	1.4328	1.234	1.631	0.101	14.144	0	-0.0498	-0.055	-0.045	0.002	-20.546	0	0.4425	0.306	0.579	0.07	6.343	0	0.2901	0.178	0.402	0.057	5.066	0	1.1257	1.019	1.232	0.054	20.697	0	-0.153
Chronic obstructive asthma		1.1386	-0.431	2.708	0.801	1.422	3.12239	0.649859	14.9992	10	6521	10	8343	0.155042	0.37138	not_significant	0.494488	0.80955	1.4372	1.239	1.636	0.101	14.179	0	-0.05	-0.055	-0.045	0.002	-20.587	0	0.4425	0.306	0.579	0.07	6.343	0	0.2906	0.178	0.403	0.057	5.075	0	1.1252	1.019	1.232	0.054	20.687	0	-0.1533
Chronic obstructive asthma with exacerbation		0.9612	-2.006	3.929	1.514	0.635	2.61483	0.134526	50.8561	10	6521	10	8343	0.525489	0.751446	not_significant	0.417444	0.279436	1.4331	1.235	1.632	0.101	14.147	0	-0.0498	-0.055	-0.045	0.002	-20.558	0	0.443	0.306	0.58	0.07	6.35	0	0.2905	0.178	0.403	0.057	5.072	0	1.1261	1.02	1.233	0.054	20.704	0	-0.1533
Chronic osteomyelitis	musculoskeletal	2.4917	0.322	4.662	1.107	2.251	12.0818	1.37988	105.848	10	6521	10	8343	0.0244047	0.108952	not_significant	1.08213	1.61253	1.4356	1.237	1.634	0.101	14.164	0	-0.0499	-0.055	-0.045	0.002	-20.584	0	0.443	0.306	0.58	0.07	6.348	0	0.2899	0.178	0.402	0.057	5.06	0	1.1278	1.021	1.234	0.054	20.728	0	-0.152
Chronic pain	neurological	-0.0975	-0.214	0.019	0.059	-1.639	0.907102	0.807348	1.01918	540	5991	931	7422	0.101118	0.286752	not_significant	-0.0423437	0.995174	1.4314	1.233	1.63	0.101	14.13	0	-0.0496	-0.054	-0.045	0.002	-20.396	0	0.4389	0.302	0.576	0.07	6.288	0	0.2918	0.18	0.404	0.057	5.095	0	1.122	1.015	1.229	0.054	20.61	0	-0.1501
Chronic pain syndrome	neurological	0.7241	0.041	1.407	0.348	2.079	2.06287	1.04185	4.08369	22	6509	16	8337	0.0376583	0.150842	not_significant	0.314473	1.42414	1.434	1.235	1.633	0.101	14.154	0	-0.0499	-0.055	-0.045	0.002	-20.576	0	0.4412	0.304	0.578	0.07	6.322	0	0.2892	0.177	0.401	0.057	5.049	0	1.1266	1.02	1.233	0.054	20.71	0	-0.1531
Chronic pancreatitis	digestive	1.0028	-0.057	2.062	0.541	1.855	2.7259	0.944594	7.86168	10	6521	10	8343	0.0636028	0.211045	not_significant	0.435511	1.19652	1.435	1.236	1.634	0.101	14.16	0	-0.0499	-0.055	-0.045	0.002	-20.576	0	0.4424	0.306	0.579	0.07	6.341	0	0.291	0.179	0.403	0.057	5.081	0	1.1261	1.019	1.233	0.054	20.701	0	-0.1534
Chronic passive congestion of liver	digestive	1.6003	-0.672	3.872	1.159	1.38	4.95452	0.510686	48.0384	10	6521	10	8343	0.167434	0.386923	not_significant	0.695001	0.776156	1.4332	1.235	1.632	0.101	14.146	0	-0.0498	-0.055	-0.045	0.002	-20.553	0	0.4427	0.306	0.579	0.07	6.346	0	0.289	0.177	0.401	0.057	5.046	0	1.1258	1.019	1.232	0.054	20.699	0	-0.1541
Chronic pericarditis	circulatory system	0.3076	-1.309	1.924	0.825	0.373	1.36016	0.27009	6.8483	10	6521	10	8343	0.709151	0.868078	not_significant	0.133589	0.149261	1.4322	1.234	1.631	0.101	14.136	0	-0.0498	-0.055	-0.045	0.002	-20.545	0	0.4429	0.306	0.58	0.07	6.349	0	0.2903	0.178	0.403	0.057	5.069	0	1.1261	1.019	1.233	0.054	20.702	0	-0.1534
Chronic periodontitis	digestive	0.8547	-1.562	3.272	1.233	0.693	2.35067	0.209716	26.364	10	6521	10	8343	0.488211	0.721239	not_significant	0.371191	0.311393	1.4319	1.233	1.63	0.101	14.134	0	-0.0498	-0.055	-0.045	0.002	-20.539	0	0.4427	0.306	0.579	0.07	6.346	0	0.2899	0.178	0.402	0.057	5.061	0	1.1258	1.019	1.232	0.054	20.699	0	-0.1538
Chronic pharyngitis and nasopharyngitis	respiratory	-0.3066	-0.553	-0.06	0.126	-2.434	0.735945	0.575222	0.941765	103	6428	214	8139	0.0149214	0.0724467	not_significant	-0.133155	1.82619	1.435	1.236	1.634	0.101	14.162	0	-0.0498	-0.055	-0.045	0.002	-20.531	0	0.4439	0.307	0.581	0.07	6.362	0	0.2916	0.179	0.404	0.057	5.09	0	1.1257	1.019	1.232	0.054	20.695	0	-0.1466
Chronic prostatitis	genitourinary	0.4994	-0.063	1.062	0.287	1.739	1.64773	0.938943	2.89215	25	6506	27	8326	0.0820363	0.251073	not_significant	0.216887	1.08599	1.4348	1.236	1.633	0.101	14.162	0	-0.0499	-0.055	-0.045	0.002	-20.576	0	0.441	0.304	0.578	0.07	6.321	0	0.29	0.178	0.402	0.057	5.064	0	1.1264	1.02	1.233	0.054	20.708	0	-0.1554
Chronic pulmonary heart disease	circulatory system	1.1378	0.55	1.726	0.3	3.792	3.1199	1.73325	5.61814	32	6499	22	8331	0.0001496	0.00157462	mi_significant	0.49414	3.82507	1.4505	1.252	1.649	0.101	14.311	0	-0.0504	-0.055	-0.046	0.002	-20.755	0	0.4414	0.305	0.578	0.07	6.325	0	0.2868	0.174	0.399	0.057	5.004	0	1.1289	1.022	1.236	0.054	20.741	0	-0.1515
Chronic renal failure [CKD]	genitourinary	1.5591	1.139	1.979	0.214	7.281	4.75454	3.12364	7.2355	88	6443	36	8317	3.31717e-13	2.65742e-11	mi_significant	0.677109	12.4792	1.4897	1.29	1.689	0.102	14.637	0	-0.0515	-0.056	-0.047	0.002	-21.11	0	0.4377	0.301	0.575	0.07	6.259	0	0.2796	0.167	0.392	0.057	4.872	0	1.1267	1.02	1.234	0.054	20.677	0	-0.1512
Chronic sinusitis	respiratory	-0.3962	-0.581	-0.212	0.094	-4.208	0.672872	0.559339	0.808965	181	6350	410	7943	2.57613e-05	0.00035719	con_significant	-0.172067	4.58903	1.4346	1.236	1.633	0.101	14.162	0	-0.0495	-0.054	-0.045	0.002	-20.391	0	0.4347	0.298	0.572	0.07	6.227	0	0.2901	0.178	0.402	0.057	5.062	0	1.1184	1.012	1.225	0.054	20.542	0	-0.1509
Chronic tonsillitis and adenoiditis	respiratory	-0.9441	-1.415	-0.473	0.24	-3.926	0.38903	0.242926	0.62313	23	6508	87	8266	8.64639e-05	0.00101937	con_significant	-0.410017	4.06317	1.4452	1.246	1.644	0.101	14.251	0	-0.0499	-0.055	-0.045	0.002	-20.568	0	0.4363	0.299	0.573	0.07	6.249	0	0.2873	0.175	0.4	0.057	5.013	0	1.1188	1.012	1.226	0.054	20.552	0	-0.1555
Chronic ulcer of leg or foot	dermatologic	1.3337	0.467	2.2	0.442	3.017	3.79506	1.5952	9.02501	16	6515	10	8343	0.00255706	0.018529	mi_significant	0.579219	2.59226	1.4402	1.242	1.639	0.101	14.209	0	-0.0501	-0.055	-0.045	0.002	-20.65	0	0.4433	0.307	0.58	0.07	6.352	0	0.2915	0.179	0.404	0.057	5.088	0	1.1297	1.023	1.236	0.054	20.754	0	-0.1505
Chronic ulcer of unspecified site	dermatologic	0.3842	-0.677	1.445	0.541	0.71	1.46844	0.508139	4.24185	10	6521	10	8343	0.477946	0.713183	not_significant	0.166856	0.320621	1.4337	1.235	1.632	0.101	14.152	0	-0.0499	-0.055	-0.045	0.002	-20.562	0	0.4423	0.306	0.579	0.07	6.34	0	0.2903	0.178	0.403	0.057	5.069	0	1.1261	1.019	1.233	0.054	20.703	0	-0.1533
Chronic venous hypertension	circulatory system	1.105	-0.33	2.54	0.732	1.51	3.01922	0.718924	12.6797	10	6521	10	8343	0.131159	0.333564	not_significant	0.479895	0.882203	1.4357	1.237	1.634	0.101	14.171	0	-0.0499	-0.055	-0.045	0.002	-20.578	0	0.4428	0.306	0.58	0.07	6.347	0	0.2903	0.178	0.402	0.057	5.068	0	1.126	1.019	1.233	0.054	20.701	0	-0.1551
Chronic venous insufficiency [CVI]	circulatory system	0.6894	0.203	1.176	0.248	2.779	1.99252	1.22507	3.24138	34	6497	37	8316	0.00545726	0.0332041	mi_significant	0.299403	2.26303	1.444	1.245	1.643	0.101	14.238	0	-0.0502	-0.055	-0.045	0.002	-20.673	0	0.4458	0.309	0.583	0.07	6.387	0	0.2919	0.18	0.404	0.057	5.096	0	1.1299	1.023	1.237	0.054	20.761	0	-0.1519
Circadian rhythm sleep disorder	neurological	0.3408	-0.151	0.832	0.251	1.359	1.40607	0.859848	2.29791	32	6499	37	8316	0.17414	0.39922	not_significant	0.148008	0.759102	1.4335	1.235	1.632	0.101	14.15	0	-0.0499	-0.055	-0.045	0.002	-20.569	0	0.4434	0.307	0.58	0.07	6.356	0	0.2894	0.177	0.402	0.057	5.054	0	1.1266	1.02	1.233	0.054	20.71	0	-0.154
Circulatory disease NEC	circulatory system	0.6635	0.367	0.96	0.151	4.388	1.94158	1.4434	2.6117	107	6424	88	8265	1.14632e-05	0.000183665	mi_significant	0.288154	4.9407	1.4289	1.23	1.627	0.101	14.104	0	-0.0499	-0.055	-0.045	0.002	-20.584	0	0.4443	0.308	0.581	0.07	6.367	0	0.2859	0.174	0.398	0.057	4.989	0	1.1293	1.023	1.236	0.054	20.751	0	-0.1592
Circumscribed scleroderma	dermatologic	-0.0465	-1.279	1.186	0.629	-0.074	0.954565	0.278315	3.27396	10	6521	10	8343	0.94103	0.975394	not_significant	-0.0201947	0.0263967	1.433	1.234	1.632	0.101	14.146	0	-0.0498	-0.055	-0.045	0.002	-20.552	0	0.4427	0.306	0.579	0.07	6.347	0	0.2902	0.178	0.402	0.057	5.068	0	1.1258	1.019	1.232	0.054	20.699	0	-0.1534
Cirrhosis of liver without mention of alcohol	digestive	1.7917	0.897	2.687	0.457	3.924	5.99964	2.45224	14.6875	23	6508	10	8343	8.69508e-05	0.00101937	mi_significant	0.778125	4.06073	1.4454	1.247	1.644	0.101	14.248	0	-0.0502	-0.055	-0.045	0.002	-20.667	0	0.444	0.307	0.581	0.07	6.362	0	0.288	0.176	0.4	0.057	5.026	0	1.1252	1.019	1.232	0.054	20.677	0	-0.1545
Cleft palate	congenital anomalies	0.5029	-1.921	2.926	1.236	0.407	1.65351	0.14646	18.6529	10	6521	10	8343	0.684232	0.852993	not_significant	0.218407	0.164797	1.4335	1.235	1.632	0.101	14.149	0	-0.0499	-0.055	-0.045	0.002	-20.555	0	0.4429	0.306	0.58	0.07	6.349	0	0.2904	0.178	0.403	0.057	5.071	0	1.1261	1.019	1.233	0.054	20.702	0	-0.1533
Colles' fracture		0.517	-2.276	3.31	1.425	0.363	1.67699	0.102694	27.3851	10	6521	10	8343	0.716797	0.872254	not_significant	0.22453	0.144604	1.433	1.234	1.632	0.101	14.146	0	-0.0498	-0.055	-0.045	0.002	-20.553	0	0.4427	0.306	0.579	0.07	6.346	0	0.29	0.178	0.402	0.057	5.064	0	1.1258	1.019	1.232	0.054	20.699	0	-0.1535
Colon cancer	neoplasms	0.626	-0.056	1.308	0.348	1.798	1.87012	0.945539	3.69877	19	6512	19	8334	0.0721333	0.230124	not_significant	0.271868	1.14186	1.4391	1.24	1.638	0.101	14.196	0	-0.05	-0.055	-0.045	0.002	-20.609	0	0.4433	0.307	0.58	0.07	6.354	0	0.2884	0.176	0.401	0.057	5.035	0	1.1263	1.02	1.233	0.054	20.705	0	-0.1531
Color vision deficiencies	sense organs	0.655	-1.357	2.667	1.027	0.638	1.92514	0.257432	14.3967	10	6521	10	8343	0.523524	0.750039	not_significant	0.284463	0.281064	1.4329	1.234	1.631	0.101	14.145	0	-0.0498	-0.055	-0.045	0.002	-20.556	0	0.4432	0.306	0.58	0.07	6.353	0	0.2904	0.178	0.403	0.057	5.071	0	1.1263	1.02	1.233	0.054	20.706	0	-0.1531
Coma	neurological	1.3586	0.423	2.294	0.477	2.846	3.89074	1.52653	9.91452	17	6514	10	8343	0.00442307	0.027974	mi_significant	0.590032	2.35428	1.4328	1.234	1.631	0.101	14.147	0	-0.0499	-0.055	-0.045	0.002	-20.583	0	0.4443	0.308	0.581	0.07	6.368	0	0.2881	0.176	0.4	0.057	5.029	0	1.1277	1.021	1.234	0.054	20.726	0	-0.1522
Complex regional/central pain syndrome	neurological	0.7088	-0.291	1.708	0.51	1.39	2.03155	0.747516	5.51791	10	6521	10	8343	0.164568	0.385549	not_significant	0.307828	0.783654	1.434	1.235	1.632	0.101	14.158	0	-0.0499	-0.055	-0.045	0.002	-20.578	0	0.4437	0.307	0.58	0.07	6.359	0	0.2911	0.179	0.403	0.057	5.082	0	1.1266	1.02	1.233	0.054	20.71	0	-0.1527
Complication due to other implant and internal device	injuries & poisonings	0.9916	0.303	1.68	0.351	2.824	2.69554	1.35391	5.36556	21	6510	16	8337	0.00473702	0.0296991	mi_significant	0.430646	2.32449	1.4418	1.243	1.641	0.101	14.219	0	-0.0502	-0.055	-0.045	0.002	-20.651	0	0.4432	0.306	0.58	0.07	6.35	0	0.2908	0.179	0.403	0.057	5.077	0	1.1291	1.022	1.236	0.054	20.746	0	-0.1512
Complication of amputation stump	injuries & poisonings	1.9578	-0.388	4.303	1.197	1.636	7.08373	0.678412	73.9212	10	6521	10	8343	0.101817	0.287882	not_significant	0.850262	0.99218	1.4354	1.237	1.634	0.101	14.165	0	-0.0499	-0.055	-0.045	0.002	-20.571	0	0.4428	0.306	0.58	0.07	6.347	0	0.2891	0.177	0.401	0.057	5.047	0	1.126	1.019	1.233	0.054	20.701	0	-0.1541
Complication of colostomy or enterostomy	injuries & poisonings	-0.2147	-1.783	1.354	0.8	-0.268	0.806783	0.168133	3.87289	10	6521	10	8343	0.788563	0.911145	not_significant	-0.093243	0.103163	1.4332	1.235	1.632	0.101	14.147	0	-0.0498	-0.055	-0.045	0.002	-20.553	0	0.4426	0.306	0.579	0.07	6.345	0	0.2903	0.178	0.403	0.057	5.069	0	1.1259	1.019	1.232	0.054	20.7	0	-0.1534
Complication of internal orthopedic device	injuries & poisonings	-0.0562	-0.679	0.566	0.318	-0.177	0.94535	0.507124	1.76121	20	6511	25	8328	0.859519	0.938446	not_significant	-0.0244073	0.0657447	1.4331	1.235	1.632	0.101	14.147	0	-0.0498	-0.055	-0.045	0.002	-20.552	0	0.4427	0.306	0.579	0.07	6.346	0	0.2903	0.178	0.403	0.057	5.069	0	1.1259	1.019	1.232	0.054	20.7	0	-0.1534
Complication of nervous system device, implant, and graft		0.4449	-2.339	3.228	1.42	0.313	1.56033	0.096424	25.2291	10	6521	10	8343	0.754076	0.894225	not_significant	0.193218	0.122585	1.4332	1.235	1.632	0.101	14.147	0	-0.0498	-0.055	-0.045	0.002	-20.554	0	0.4427	0.306	0.579	0.07	6.346	0	0.2898	0.178	0.402	0.057	5.06	0	1.1258	1.019	1.232	0.054	20.699	0	-0.1534
Complications of cardiac/vascular device, implant, and graft	injuries & poisonings	2.351	1.451	3.251	0.459	5.12	10.4961	4.26738	25.8161	37	6494	10	8343	3.05824e-07	7.55885e-06	mi_significant	1.02103	6.51453	1.4379	1.239	1.637	0.102	14.164	0	-0.0502	-0.055	-0.045	0.002	-20.637	0	0.4441	0.307	0.581	0.07	6.355	0	0.2915	0.179	0.404	0.057	5.083	0	1.1305	1.024	1.237	0.054	20.756	0	-0.1507
Complications of gastrostomy, colostomy and enterostomy	digestive	0.0439	-1.947	2.035	1.016	0.043	1.04488	0.142702	7.65225	10	6521	10	8343	0.965548	0.986651	not_significant	0.0190655	0.0152261	1.433	1.234	1.632	0.101	14.145	0	-0.0498	-0.055	-0.045	0.002	-20.551	0	0.4427	0.306	0.579	0.07	6.346	0	0.2902	0.178	0.402	0.057	5.066	0	1.1258	1.019	1.232	0.054	20.699	0	-0.1534
Complications of surgical and medical procedures		0.4688	0.2	0.738	0.137	3.419	1.59808	1.2214	2.09175	157	6374	102	8251	0.000629111	0.00577436	mi_significant	0.203597	3.20127	1.436	1.237	1.635	0.101	14.171	0	-0.05	-0.055	-0.045	0.002	-20.626	0	0.4407	0.304	0.577	0.07	6.317	0	0.2862	0.174	0.398	0.057	4.995	0	1.116	1.009	1.223	0.054	20.486	0	-0.1505
Complications of transplants and reattached limbs	injuries & poisonings	1.1772	0.795	1.559	0.195	6.039	3.24527	2.21444	4.75406	95	6436	45	8308	1.54717e-09	6.5618e-08	mi_significant	0.511251	8.81046	1.4565	1.257	1.656	0.102	14.334	0	-0.0506	-0.055	-0.046	0.002	-20.799	0	0.4399	0.303	0.577	0.07	6.299	0	0.2837	0.171	0.396	0.057	4.948	0	1.1247	1.018	1.231	0.054	20.65	0	-0.1526
Concussion	injuries & poisonings	0.0233	-0.504	0.55	0.269	0.087	1.02357	0.604109	1.73325	26	6505	37	8316	0.930864	0.972685	not_significant	0.0101191	0.031114	1.433	1.234	1.632	0.101	14.146	0	-0.0498	-0.055	-0.045	0.002	-20.552	0	0.4427	0.306	0.579	0.07	6.346	0	0.2902	0.178	0.402	0.057	5.067	0	1.1259	1.019	1.232	0.054	20.699	0	-0.1534
Conduct disorders	mental disorders	-1.1142	-3.407	1.179	1.17	-0.952	0.328178	0.0331405	3.25112	10	6521	10	8343	0.340885	0.591385	not_significant	-0.483891	0.467393	1.4334	1.235	1.632	0.101	14.149	0	-0.0498	-0.055	-0.045	0.002	-20.55	0	0.442	0.305	0.579	0.07	6.336	0	0.2895	0.177	0.402	0.057	5.055	0	1.1258	1.019	1.232	0.054	20.697	0	-0.1541
Conductive hearing loss	sense organs	-0.0111	-0.54	0.518	0.27	-0.041	0.988961	0.582748	1.67867	27	6504	35	8318	0.967255	0.987107	not_significant	-0.00482067	0.0144591	1.433	1.234	1.632	0.101	14.146	0	-0.0498	-0.055	-0.045	0.002	-20.549	0	0.4427	0.306	0.579	0.07	6.344	0	0.2901	0.178	0.402	0.057	5.065	0	1.1258	1.019	1.232	0.054	20.698	0	-0.1534
Congenital anomalies of abdominal wall; diaphram	congenital anomalies	1.0433	-0.593	2.68	0.835	1.249	2.83857	0.552667	14.5851	10	6521	10	8343	0.211496	0.446526	not_significant	0.453099	0.674698	1.4299	1.231	1.628	0.101	14.112	0	-0.0498	-0.055	-0.045	0.002	-20.531	0	0.4438	0.307	0.581	0.07	6.362	0	0.2913	0.179	0.404	0.057	5.087	0	1.1258	1.019	1.232	0.054	20.695	0	-0.1525
Congenital anomalies of breast	genitourinary	-0.5658	-2.836	1.705	1.158	-0.488	0.567906	0.0586598	5.50139	10	6521	10	8343	0.625254	0.814468	not_significant	-0.245724	0.203944	1.4331	1.235	1.632	0.101	14.147	0	-0.0498	-0.055	-0.045	0.002	-20.554	0	0.4427	0.306	0.579	0.07	6.346	0	0.2904	0.178	0.403	0.057	5.071	0	1.1258	1.019	1.232	0.054	20.699	0	-0.153
Congenital anomalies of esophagus	congenital anomalies	-0.1691	-2.643	2.305	1.262	-0.134	0.844424	0.0711475	10.0242	10	6521	10	8343	0.893392	0.956647	not_significant	-0.0734392	0.0489581	1.4331	1.235	1.632	0.101	14.146	0	-0.0498	-0.055	-0.045	0.002	-20.553	0	0.4426	0.306	0.579	0.07	6.344	0	0.2901	0.178	0.402	0.057	5.065	0	1.1257	1.019	1.232	0.054	20.694	0	-0.1535
Congenital anomalies of face and neck	congenital anomalies	0.2037	-0.538	0.945	0.378	0.539	1.22593	0.583915	2.57281	14	6517	18	8335	0.590108	0.795266	not_significant	0.0884658	0.229069	1.433	1.234	1.632	0.101	14.145	0	-0.0498	-0.055	-0.045	0.002	-20.556	0	0.4426	0.306	0.579	0.07	6.345	0	0.2904	0.178	0.403	0.057	5.071	0	1.1262	1.02	1.233	0.054	20.704	0	-0.1534
Congenital anomalies of genital organs	congenital anomalies	2.1939	1.52	2.867	0.344	6.385	8.97013	4.57223	17.5842	72	6459	10	8343	1.71165e-10	9.1415e-09	mi_significant	0.952799	9.76658	1.4005	1.202	1.599	0.102	13.795	0	-0.0493	-0.054	-0.045	0.002	-20.295	0	0.4522	0.315	0.589	0.07	6.478	0	0.2904	0.178	0.403	0.057	5.059	0	1.13	1.023	1.237	0.054	20.736	0	-0.1554
Congenital anomalies of great vessels	congenital anomalies	0.0983	-0.996	1.192	0.558	0.176	1.10329	0.369354	3.29366	10	6521	10	8343	0.860174	0.938446	not_significant	0.0426911	0.0654138	1.4329	1.234	1.631	0.101	14.144	0	-0.0498	-0.055	-0.045	0.002	-20.552	0	0.4428	0.306	0.579	0.07	6.347	0	0.2902	0.178	0.402	0.057	5.068	0	1.1259	1.019	1.232	0.054	20.7	0	-0.1535
Congenital anomalies of intestine	congenital anomalies	0.1584	-1.458	1.774	0.824	0.192	1.17163	0.232701	5.89438	10	6521	10	8343	0.847647	0.933772	not_significant	0.0687922	0.071785	1.4333	1.235	1.632	0.101	14.147	0	-0.0498	-0.055	-0.045	0.002	-20.553	0	0.4427	0.306	0.579	0.07	6.347	0	0.2901	0.178	0.402	0.057	5.066	0	1.1259	1.019	1.232	0.054	20.7	0	-0.1534
Congenital anomalies of male genital organs	congenital anomalies	0.9979	0.548	1.448	0.23	4.345	2.71258	1.72979	4.2546	72	6459	30	8323	1.39218e-05	0.000213607	mi_significant	0.433382	4.85631	1.4196	1.221	1.618	0.101	13.999	0	-0.0496	-0.054	-0.045	0.002	-20.44	0	0.4405	0.304	0.577	0.07	6.31	0	0.2876	0.175	0.4	0.057	5.02	0	1.123	1.016	1.23	0.054	20.634	0	-0.1559
Congenital anomalies of mouth/tongue	congenital anomalies	-1.0634	-2.051	-0.076	0.504	-2.11	0.34528	0.128606	0.926816	10	6521	24	8329	0.034826	0.144308	not_significant	-0.461829	1.4581	1.4336	1.235	1.632	0.101	14.15	0	-0.0498	-0.055	-0.045	0.002	-20.55	0	0.4429	0.306	0.58	0.07	6.348	0	0.2907	0.178	0.403	0.057	5.075	0	1.1258	1.019	1.232	0.054	20.698	0	-0.1506
Congenital anomalies of muscle, tendon, fascia, and connective tissue	congenital anomalies	1.0048	-0.447	2.456	0.741	1.357	2.73136	0.639544	11.6581	10	6521	10	8343	0.17489	0.399669	not_significant	0.436379	0.757235	1.4322	1.234	1.631	0.101	14.136	0	-0.0498	-0.055	-0.045	0.002	-20.553	0	0.4439	0.307	0.581	0.07	6.363	0	0.2902	0.178	0.402	0.057	5.067	0	1.127	1.02	1.234	0.054	20.717	0	-0.1526
Congenital anomalies of peripheral vascular system	congenital anomalies	-0.9689	-2.108	0.17	0.581	-1.667	0.3795	0.121481	1.1853	10	6521	15	8338	0.0954693	0.279243	not_significant	-0.420788	1.02014	1.4313	1.233	1.63	0.101	14.13	0	-0.0498	-0.055	-0.045	0.002	-20.53	0	0.4435	0.307	0.58	0.07	6.357	0	0.2906	0.178	0.403	0.057	5.074	0	1.1265	1.02	1.233	0.054	20.708	0	-0.1527
Congenital anomalies of posterior segment of eye	congenital anomalies	0.2234	-1.637	2.084	0.949	0.235	1.25032	0.194563	8.03655	10	6521	10	8343	0.813938	0.922444	not_significant	0.0970214	0.0894085	1.4332	1.235	1.632	0.101	14.147	0	-0.0498	-0.055	-0.045	0.002	-20.554	0	0.4427	0.306	0.579	0.07	6.346	0	0.2902	0.178	0.402	0.057	5.068	0	1.1258	1.019	1.232	0.054	20.698	0	-0.1536
Congenital anomalies of skin	dermatologic	-0.0088	-0.483	0.465	0.242	-0.036	0.991239	0.61693	1.59201	31	6500	44	8309	0.97099	0.987936	not_significant	-0.00382179	0.0127851	1.4331	1.234	1.632	0.101	14.143	0	-0.0498	-0.055	-0.045	0.002	-20.552	0	0.4427	0.306	0.579	0.07	6.345	0	0.2902	0.178	0.402	0.057	5.067	0	1.1258	1.019	1.232	0.054	20.697	0	-0.1534
Congenital anomalies of the eye	congenital anomalies	-0.7924	-2.489	0.905	0.866	-0.915	0.452757	0.0829929	2.47193	10	6521	10	8343	0.360111	0.611637	not_significant	-0.344135	0.443564	1.4332	1.235	1.632	0.101	14.148	0	-0.0498	-0.055	-0.045	0.002	-20.552	0	0.443	0.306	0.58	0.07	6.35	0	0.2902	0.178	0.402	0.057	5.068	0	1.126	1.019	1.233	0.054	20.703	0	-0.1534
Congenital anomalies of the integument	congenital anomalies	0.181	-0.613	0.975	0.405	0.447	1.19842	0.541723	2.65117	11	6520	16	8337	0.654916	0.836373	not_significant	0.0786073	0.183814	1.433	1.234	1.632	0.101	14.145	0	-0.0499	-0.055	-0.045	0.002	-20.557	0	0.4435	0.307	0.58	0.07	6.355	0	0.2908	0.179	0.403	0.057	5.077	0	1.1266	1.02	1.233	0.054	20.703	0	-0.1526
Congenital anomalies of upper limb, including shoulder girdle	congenital anomalies	0.2978	-1.129	1.725	0.728	0.409	1.34689	0.323356	5.61252	10	6521	10	8343	0.682499	0.852993	not_significant	0.129333	0.165898	1.4329	1.234	1.631	0.101	14.145	0	-0.0498	-0.055	-0.045	0.002	-20.554	0	0.4425	0.306	0.579	0.07	6.343	0	0.2902	0.178	0.402	0.057	5.068	0	1.126	1.019	1.233	0.054	20.701	0	-0.1532
Congenital anomalies of urinary system	congenital anomalies	0.976	-0.093	2.045	0.545	1.79	2.65382	0.911194	7.72916	12	6519	10	8343	0.073491	0.232399	not_significant	0.423871	1.13377	1.4322	1.234	1.631	0.101	14.135	0	-0.0498	-0.055	-0.045	0.002	-20.551	0	0.4438	0.307	0.581	0.07	6.361	0	0.2902	0.178	0.402	0.057	5.068	0	1.1258	1.019	1.232	0.054	20.695	0	-0.1536
Congenital anomaly of fingers/toes	congenital anomalies	-0.5341	-3.024	1.956	1.27	-0.42	0.586197	0.0486064	7.07099	10	6521	10	8343	0.674168	0.849781	not_significant	-0.231957	0.171232	1.4329	1.234	1.631	0.101	14.145	0	-0.0498	-0.055	-0.045	0.002	-20.55	0	0.4425	0.306	0.579	0.07	6.344	0	0.2902	0.178	0.402	0.057	5.068	0	1.1258	1.019	1.232	0.054	20.699	0	-0.1536
Congenital anomaly of gallbladder, bile ducts, liver, pancreas	congenital anomalies	0.2056	-1.178	1.589	0.706	0.291	1.22826	0.307894	4.89885	10	6521	10	8343	0.770843	0.900184	not_significant	0.0892909	0.113034	1.4325	1.234	1.631	0.101	14.14	0	-0.0498	-0.055	-0.045	0.002	-20.549	0	0.4426	0.306	0.579	0.07	6.345	0	0.2904	0.178	0.403	0.057	5.07	0	1.1258	1.019	1.232	0.054	20.699	0	-0.1533
Congenital cataract and lens anomalies	congenital anomalies	1.1991	-1.212	3.61	1.23	0.975	3.31713	0.297601	36.9661	10	6521	10	8343	0.329687	0.579516	not_significant	0.520763	0.481898	1.433	1.234	1.632	0.101	14.145	0	-0.0498	-0.055	-0.045	0.002	-20.551	0	0.4418	0.305	0.579	0.07	6.332	0	0.2902	0.178	0.402	0.057	5.068	0	1.1258	1.019	1.232	0.054	20.699	0	-0.1539
Congenital coagulation defects	hematopoietic	1.2759	-0.979	3.531	1.151	1.109	3.58192	0.375687	34.1581	10	6521	10	8343	0.267487	0.510207	not_significant	0.554116	0.572697	1.4321	1.234	1.631	0.101	14.137	0	-0.0498	-0.055	-0.045	0.002	-20.542	0	0.4427	0.306	0.579	0.07	6.346	0	0.2902	0.178	0.402	0.057	5.067	0	1.125	1.018	1.232	0.054	20.682	0	-0.154
Congenital deficiency of other clotting factors (including factor VII)	hematopoietic	0.4919	-1.351	2.335	0.94	0.523	1.63542	0.258981	10.3295	10	6521	10	8343	0.60089	0.799448	not_significant	0.213629	0.221205	1.4324	1.234	1.631	0.101	14.139	0	-0.0498	-0.055	-0.045	0.002	-20.548	0	0.4429	0.306	0.58	0.07	6.349	0	0.29	0.178	0.402	0.057	5.064	0	1.1259	1.019	1.232	0.054	20.7	0	-0.1533
Congenital deformities of feet	congenital anomalies	-0.7306	-1.424	-0.037	0.354	-2.065	0.48162	0.240749	0.963676	11	6520	36	8317	0.0389042	0.153163	not_significant	-0.317296	1.41	1.4366	1.238	1.635	0.101	14.179	0	-0.0498	-0.055	-0.045	0.002	-20.539	0	0.4381	0.301	0.575	0.07	6.277	0	0.2873	0.175	0.4	0.057	5.014	0	1.1221	1.015	1.229	0.054	20.617	0	-0.1559
Congenital factor VIII disorder	hematopoietic	-0.6739	-2.249	0.901	0.803	-0.839	0.509717	0.105505	2.46206	10	6521	10	8343	0.401529	0.654982	not_significant	-0.292671	0.396284	1.4334	1.235	1.632	0.101	14.149	0	-0.0498	-0.055	-0.045	0.002	-20.556	0	0.4427	0.306	0.579	0.07	6.346	0	0.2904	0.178	0.403	0.057	5.071	0	1.1269	1.02	1.234	0.054	20.712	0	-0.1532
Congenital hip dysplasia and deformity	congenital anomalies	-1.2072	-3.399	0.984	1.118	-1.08	0.299033	0.0334067	2.67514	10	6521	10	8343	0.280336	0.518307	not_significant	-0.52428	0.552321	1.4323	1.234	1.631	0.101	14.14	0	-0.0498	-0.055	-0.045	0.002	-20.543	0	0.4424	0.306	0.579	0.07	6.342	0	0.2907	0.178	0.403	0.057	5.076	0	1.1259	1.019	1.232	0.054	20.699	0	-0.1534
Congenital hypothyroidism	endocrine/metabolic	0.961	-0.926	2.848	0.963	0.998	2.61431	0.396135	17.2532	10	6521	10	8343	0.318296	0.56386	not_significant	0.417357	0.497169	1.4335	1.235	1.632	0.101	14.15	0	-0.0498	-0.055	-0.045	0.002	-20.556	0	0.4421	0.305	0.579	0.07	6.337	0	0.2894	0.177	0.402	0.057	5.054	0	1.1259	1.019	1.232	0.054	20.7	0	-0.1537
Congenital musculoskeletal deformities of spine	congenital anomalies	-0.3795	-1.522	0.763	0.583	-0.651	0.684203	0.218275	2.1447	10	6521	10	8343	0.514892	0.741732	not_significant	-0.164815	0.288284	1.4327	1.234	1.631	0.101	14.143	0	-0.0498	-0.055	-0.045	0.002	-20.54	0	0.442	0.305	0.579	0.07	6.336	0	0.2901	0.178	0.402	0.057	5.066	0	1.1256	1.019	1.232	0.054	20.694	0	-0.154
Congenital osteodystrophies	congenital anomalies	-0.2308	-0.644	0.182	0.211	-1.095	0.793898	0.525187	1.19961	37	6494	71	8282	0.273499	0.514864	not_significant	-0.100235	0.563044	1.4321	1.234	1.631	0.101	14.137	0	-0.0498	-0.055	-0.045	0.002	-20.53	0	0.4423	0.306	0.579	0.07	6.341	0	0.2917	0.179	0.404	0.057	5.091	0	1.1258	1.019	1.232	0.054	20.698	0	-0.1524
Congenital pigmentary anomalies of skin	dermatologic	-0.6465	-2.447	1.153	0.918	-0.704	0.523876	0.0865529	3.16768	10	6521	10	8343	0.48144	0.713927	not_significant	-0.280771	0.317458	1.4334	1.235	1.632	0.101	14.15	0	-0.0498	-0.055	-0.045	0.002	-20.553	0	0.4428	0.306	0.58	0.07	6.348	0	0.2898	0.178	0.402	0.057	5.06	0	1.1258	1.019	1.232	0.054	20.698	0	-0.1537
Congestive heart failure (CHF) NOS	circulatory system	1.7511	1.117	2.385	0.323	5.415	5.76094	3.05567	10.8591	40	6491	15	8338	6.13744e-08	1.80616e-06	mi_significant	0.760493	7.21201	1.4625	1.263	1.662	0.102	14.4	0	-0.0508	-0.056	-0.046	0.002	-20.868	0	0.4467	0.31	0.584	0.07	6.394	0	0.2871	0.175	0.4	0.057	5.006	0	1.1315	1.025	1.238	0.054	20.771	0	-0.1479
Conjunctivitis, infectious	sense organs	-0.8117	-1.059	-0.564	0.126	-6.435	0.444102	0.346802	0.568929	87	6444	303	8050	1.23309e-10	6.83888e-09	con_significant	-0.352517	9.90901	1.4454	1.247	1.644	0.101	14.254	0	-0.0494	-0.054	-0.045	0.002	-20.351	0	0.4224	0.285	0.559	0.07	6.043	0	0.2749	0.162	0.387	0.057	4.788	0	1.1063	0.999	1.213	0.055	20.282	0	-0.1608
Conjunctivitis, noninfectious	sense organs	-1	-2.093	0.093	0.557	-1.794	0.367879	0.123317	1.09746	10	6521	21	8332	0.0728372	0.231759	not_significant	-0.434294	1.13765	1.4316	1.233	1.63	0.101	14.131	0	-0.0498	-0.055	-0.045	0.002	-20.525	0	0.4424	0.306	0.579	0.07	6.342	0	0.2894	0.177	0.402	0.057	5.053	0	1.1256	1.019	1.232	0.054	20.693	0	-0.1513
Constipation	digestive	0.7082	0.495	0.921	0.109	6.509	2.03033	1.6405	2.5118	223	6308	175	8178	7.56504e-11	4.54533e-09	mi_significant	0.307567	10.1212	1.4404	1.242	1.639	0.101	14.207	0	-0.0506	-0.055	-0.046	0.002	-20.819	0	0.4496	0.313	0.586	0.07	6.437	0	0.2884	0.176	0.401	0.057	5.029	0	1.136	1.029	1.243	0.055	20.843	0	-0.1507
Constitutional aplastic anemia	hematopoietic	-0.3496	-3.327	2.628	1.519	-0.23	0.70497	0.0359006	13.8461	10	6521	10	8343	0.817962	0.923301	not_significant	-0.151829	0.087267	1.4333	1.235	1.632	0.101	14.147	0	-0.0498	-0.055	-0.045	0.002	-20.553	0	0.4427	0.306	0.579	0.07	6.346	0	0.2902	0.178	0.402	0.057	5.068	0	1.1259	1.019	1.233	0.054	20.7	0	-0.1533
Contact and allergic dermatitis of eyelid	dermatologic	-0.148	-1.415	1.119	0.647	-0.229	0.862431	0.242926	3.06179	10	6521	10	8343	0.81895	0.923301	not_significant	-0.0642756	0.0867425	1.4331	1.235	1.632	0.101	14.147	0	-0.0498	-0.055	-0.045	0.002	-20.553	0	0.4427	0.306	0.579	0.07	6.346	0	0.2903	0.178	0.403	0.057	5.069	0	1.1258	1.019	1.232	0.054	20.699	0	-0.1532
Contact dermatitis and other eczema due to plants [except food]	dermatologic	-0.5383	-1.046	-0.031	0.259	-2.08	0.58374	0.35134	0.969476	21	6510	61	8292	0.0375196	0.150842	not_significant	-0.233781	1.42574	1.4393	1.241	1.638	0.101	14.198	0	-0.0498	-0.055	-0.045	0.002	-20.532	0	0.435	0.298	0.572	0.07	6.228	0	0.2843	0.172	0.397	0.057	4.958	0	1.1186	1.012	1.225	0.054	20.528	0	-0.1585
Contracture of joint	musculoskeletal	0.1494	-0.671	0.97	0.419	0.357	1.16114	0.511197	2.63794	11	6520	14	8339	0.721211	0.876064	not_significant	0.0648836	0.141937	1.4328	1.234	1.631	0.101	14.144	0	-0.0498	-0.055	-0.045	0.002	-20.553	0	0.4426	0.306	0.579	0.07	6.344	0	0.29	0.178	0.402	0.057	5.064	0	1.126	1.019	1.233	0.054	20.701	0	-0.1534
Contracture of palmar fascia [Dupuytren's disease]	musculoskeletal	0.167	-0.826	1.16	0.507	0.33	1.18175	0.437797	3.18993	10	6521	15	8338	0.741748	0.889111	not_significant	0.0725272	0.129744	1.4342	1.236	1.633	0.101	14.148	0	-0.0499	-0.055	-0.045	0.002	-20.544	0	0.4427	0.306	0.579	0.07	6.346	0	0.2904	0.178	0.403	0.057	5.071	0	1.1261	1.019	1.233	0.054	20.701	0	-0.1535
Contracture of tendon (sheath)	musculoskeletal	0.0158	-1.512	1.544	0.78	0.02	1.01593	0.220469	4.68329	10	6521	10	8343	0.983851	0.991432	not_significant	0.00686185	0.00707048	1.433	1.234	1.632	0.101	14.145	0	-0.0498	-0.055	-0.045	0.002	-20.55	0	0.4427	0.306	0.579	0.07	6.346	0	0.2902	0.178	0.402	0.057	5.068	0	1.1258	1.019	1.232	0.054	20.699	0	-0.1534
Contusion	injuries & poisonings	-0.3582	-0.574	-0.143	0.11	-3.256	0.698933	0.563268	0.866754	134	6397	290	8063	0.00112962	0.00920287	con_significant	-0.155564	2.94707	1.4356	1.237	1.634	0.101	14.168	0	-0.0496	-0.054	-0.045	0.002	-20.463	0	0.4398	0.303	0.577	0.07	6.302	0	0.2911	0.179	0.403	0.057	5.081	0	1.1206	1.014	1.227	0.054	20.59	0	-0.1523
Convulsions	neurological	0.3656	-0.057	0.788	0.216	1.696	1.44138	0.944594	2.19899	50	6481	44	8309	0.0899273	0.268645	not_significant	0.158778	1.04611	1.4292	1.231	1.628	0.101	14.106	0	-0.0498	-0.055	-0.045	0.002	-20.54	0	0.4425	0.306	0.579	0.07	6.342	0	0.2892	0.177	0.401	0.057	5.049	0	1.1266	1.02	1.233	0.054	20.71	0	-0.1528
Cornea replaced by transplant	sense organs	0.2597	-1.217	1.736	0.753	0.345	1.29654	0.296117	5.6746	10	6521	10	8343	0.73032	0.881804	not_significant	0.112786	0.136487	1.4336	1.235	1.632	0.101	14.149	0	-0.0499	-0.055	-0.045	0.002	-20.554	0	0.4429	0.306	0.58	0.07	6.349	0	0.2902	0.178	0.402	0.057	5.067	0	1.126	1.019	1.233	0.054	20.701	0	-0.1533
Corneal degenerations	sense organs	0.0592	-0.916	1.035	0.498	0.119	1.06099	0.400116	2.81511	10	6521	12	8341	0.905311	0.964476	not_significant	0.0257102	0.0432024	1.4333	1.235	1.632	0.101	14.143	0	-0.0498	-0.055	-0.045	0.002	-20.544	0	0.4425	0.306	0.579	0.07	6.341	0	0.2902	0.178	0.402	0.057	5.067	0	1.1258	1.019	1.232	0.054	20.699	0	-0.1534
Corneal edema	sense organs	0.6274	-1.05	2.305	0.856	0.733	1.87274	0.349938	10.0242	10	6521	10	8343	0.463589	0.701634	not_significant	0.272476	0.333867	1.4339	1.235	1.633	0.101	14.153	0	-0.0499	-0.055	-0.045	0.002	-20.561	0	0.4425	0.306	0.579	0.07	6.343	0	0.2902	0.178	0.402	0.057	5.068	0	1.126	1.019	1.233	0.054	20.701	0	-0.1534
Corneal opacity	sense organs	0.1876	-0.679	1.054	0.442	0.424	1.20635	0.507124	2.8691	10	6521	14	8339	0.671502	0.849237	not_significant	0.0814736	0.172953	1.4333	1.235	1.632	0.101	14.149	0	-0.0499	-0.055	-0.045	0.002	-20.557	0	0.4429	0.306	0.58	0.07	6.349	0	0.2906	0.178	0.403	0.057	5.074	0	1.1263	1.02	1.233	0.054	20.703	0	-0.1532
Corneal opacity and other disorders of cornea	sense organs	-0.4512	-1.49	0.588	0.53	-0.851	0.636863	0.225373	1.80038	10	6521	14	8339	0.394579	0.649214	not_significant	-0.195954	0.403866	1.4334	1.235	1.632	0.101	14.149	0	-0.0498	-0.055	-0.045	0.002	-20.541	0	0.4416	0.305	0.578	0.07	6.329	0	0.2891	0.177	0.401	0.057	5.047	0	1.1245	1.018	1.231	0.054	20.668	0	-0.1543
Corneal ulcer	sense organs	-0.694	-1.971	0.583	0.652	-1.065	0.499574	0.139317	1.7914	10	6521	12	8341	0.286853	0.525593	not_significant	-0.3014	0.542341	1.4324	1.234	1.631	0.101	14.138	0	-0.0498	-0.055	-0.045	0.002	-20.53	0	0.442	0.305	0.579	0.07	6.336	0	0.2892	0.177	0.401	0.057	5.049	0	1.1248	1.018	1.231	0.054	20.676	0	-0.1537
Corns and callosities	dermatologic	-0.3217	-0.815	0.172	0.252	-1.277	0.724916	0.442639	1.18768	25	6506	53	8300	0.201548	0.43573	not_significant	-0.139713	0.695622	1.435	1.236	1.634	0.101	14.164	0	-0.0498	-0.055	-0.045	0.002	-20.549	0	0.4409	0.304	0.578	0.07	6.319	0	0.2898	0.178	0.402	0.057	5.06	0	1.1242	1.018	1.231	0.054	20.663	0	-0.1537
Coronary atherosclerosis	circulatory system	0.6814	0.353	1.01	0.168	4.061	1.97664	1.42333	2.7456	75	6456	99	8254	4.88314e-05	0.000628704	mi_significant	0.295928	4.3113	1.4915	1.291	1.692	0.102	14.578	0	-0.0515	-0.056	-0.047	0.002	-20.936	0	0.4408	0.304	0.578	0.07	6.315	0	0.2859	0.174	0.398	0.057	4.99	0	1.1283	1.022	1.235	0.054	20.729	0	-0.1523
Costochondritis		0.1033	-0.459	0.666	0.287	0.36	1.10882	0.631915	1.94644	23	6508	31	8322	0.718961	0.87415	not_significant	0.0448626	0.143295	1.4325	1.234	1.631	0.101	14.14	0	-0.0498	-0.055	-0.045	0.002	-20.552	0	0.4429	0.306	0.58	0.07	6.349	0	0.2903	0.178	0.403	0.057	5.069	0	1.1261	1.02	1.233	0.054	20.702	0	-0.1534
Cough	respiratory	-0.3614	-0.486	-0.237	0.064	-5.684	0.6967	0.615082	0.788991	423	6108	945	7408	1.31654e-08	4.41501e-07	con_significant	-0.156954	7.88057	1.4394	1.241	1.638	0.101	14.201	0	-0.0489	-0.054	-0.044	0.002	-20.15	0	0.4138	0.277	0.551	0.07	5.916	0	0.2797	0.167	0.392	0.057	4.875	0	1.1008	0.994	1.208	0.055	20.167	0	-0.154
Cramp of limb		0.1703	-0.465	0.805	0.324	0.525	1.18566	0.628135	2.2367	18	6513	25	8328	0.599246	0.799364	not_significant	0.0739604	0.222395	1.4339	1.235	1.632	0.101	14.152	0	-0.0499	-0.055	-0.045	0.002	-20.557	0	0.4435	0.307	0.58	0.07	6.356	0	0.2903	0.178	0.403	0.057	5.069	0	1.1264	1.02	1.233	0.054	20.705	0	-0.1527
Crushing injury		0.1174	-0.818	1.053	0.477	0.246	1.12457	0.441313	2.86624	10	6521	12	8341	0.805563	0.919705	not_significant	0.0509862	0.0939003	1.433	1.234	1.632	0.101	14.145	0	-0.0498	-0.055	-0.045	0.002	-20.554	0	0.4429	0.306	0.58	0.07	6.348	0	0.2903	0.178	0.403	0.057	5.07	0	1.126	1.019	1.233	0.054	20.701	0	-0.1533
Crushing or internal injury to organs		0.3589	-0.285	1.002	0.328	1.093	1.43175	0.752014	2.72372	20	6511	21	8332	0.274411	0.514877	not_significant	0.155868	0.561598	1.432	1.233	1.631	0.101	14.135	0	-0.0499	-0.055	-0.045	0.002	-20.56	0	0.4438	0.307	0.581	0.07	6.36	0	0.2903	0.178	0.403	0.057	5.07	0	1.1273	1.021	1.234	0.054	20.719	0	-0.1522
Crystal arthropathies	endocrine/metabolic	-0.4218	-2.873	2.029	1.25	-0.337	0.655865	0.0565291	7.60648	10	6521	10	8343	0.735877	0.885016	not_significant	-0.183185	0.133195	1.4328	1.234	1.631	0.101	14.144	0	-0.0498	-0.055	-0.045	0.002	-20.549	0	0.4426	0.306	0.579	0.07	6.344	0	0.2902	0.178	0.402	0.057	5.068	0	1.1258	1.019	1.232	0.054	20.699	0	-0.1535
Curvature of spine	musculoskeletal	0.5659	-1.51	2.642	1.059	0.534	1.76103	0.22091	14.0413	10	6521	10	8343	0.593218	0.795429	not_significant	0.245767	0.226786	1.433	1.234	1.632	0.101	14.146	0	-0.0498	-0.055	-0.045	0.002	-20.557	0	0.4424	0.306	0.579	0.07	6.342	0	0.2906	0.178	0.403	0.057	5.075	0	1.1263	1.02	1.233	0.054	20.704	0	-0.1529
Cushing's syndrome	endocrine/metabolic	-0.2705	-2.579	2.038	1.178	-0.23	0.762998	0.0758498	7.67524	10	6521	10	8343	0.818382	0.923301	not_significant	-0.117477	0.0870438	1.4324	1.234	1.631	0.101	14.136	0	-0.0498	-0.055	-0.045	0.002	-20.54	0	0.4428	0.306	0.58	0.07	6.348	0	0.2905	0.178	0.403	0.057	5.071	0	1.1258	1.019	1.232	0.054	20.699	0	-0.1534
Cutaneous lupus erythematosus	dermatologic	0.1745	-1.017	1.365	0.608	0.287	1.19065	0.361678	3.91572	10	6521	10	8343	0.77399	0.900184	not_significant	0.0757844	0.111265	1.4329	1.234	1.631	0.101	14.145	0	-0.0498	-0.055	-0.045	0.002	-20.553	0	0.4426	0.306	0.579	0.07	6.344	0	0.2903	0.178	0.403	0.057	5.07	0	1.1259	1.019	1.233	0.054	20.701	0	-0.1535
Cyst and pseudocyst of pancreas	digestive	0.5421	-0.718	1.802	0.643	0.843	1.71961	0.487727	6.06176	10	6521	10	8343	0.399011	0.651612	not_significant	0.235431	0.399015	1.4345	1.236	1.633	0.101	14.159	0	-0.0499	-0.055	-0.045	0.002	-20.567	0	0.4414	0.305	0.578	0.07	6.326	0	0.2904	0.178	0.403	0.057	5.072	0	1.126	1.019	1.233	0.054	20.701	0	-0.1536
Cyst of bone	musculoskeletal	-0.4506	-1.55	0.649	0.561	-0.803	0.637246	0.212248	1.91363	10	6521	11	8342	0.421922	0.672035	not_significant	-0.195693	0.374768	1.4333	1.235	1.632	0.101	14.15	0	-0.0498	-0.055	-0.045	0.002	-20.545	0	0.4423	0.306	0.579	0.07	6.34	0	0.2893	0.177	0.402	0.057	5.051	0	1.1252	1.019	1.232	0.054	20.684	0	-0.1542
Cyst of kidney, acquired	genitourinary	0.4626	-0.016	0.941	0.244	1.894	1.5882	0.984127	2.56254	34	6497	43	8310	0.0582593	0.200024	not_significant	0.200905	1.23463	1.4434	1.245	1.642	0.101	14.229	0	-0.0501	-0.055	-0.045	0.002	-20.634	0	0.4408	0.304	0.578	0.07	6.318	0	0.2891	0.177	0.401	0.057	5.049	0	1.1262	1.02	1.233	0.054	20.703	0	-0.1541
Cyst of the salivary gland	digestive	0.1669	-1.71	2.044	0.958	0.174	1.18164	0.180866	7.72143	10	6521	10	8343	0.861643	0.938446	not_significant	0.0724837	0.0646727	1.4331	1.235	1.632	0.101	14.147	0	-0.0498	-0.055	-0.045	0.002	-20.553	0	0.4428	0.306	0.58	0.07	6.348	0	0.2903	0.178	0.403	0.057	5.069	0	1.1259	1.019	1.233	0.054	20.7	0	-0.1533
Cystic fibrosis	respiratory	2.3623	1.154	3.571	0.617	3.832	10.6153	3.17085	35.5521	32	6499	10	8343	0.000127306	0.00134982	mi_significant	1.02593	3.89515	1.4182	1.219	1.617	0.101	13.986	0	-0.0495	-0.054	-0.045	0.002	-20.39	0	0.4436	0.307	0.58	0.07	6.36	0	0.2838	0.171	0.396	0.057	4.95	0	1.1224	1.016	1.229	0.054	20.628	0	-0.1568
Cystic kidney disease	congenital anomalies	0.8483	0.276	1.421	0.292	2.903	2.33567	1.31785	4.14126	33	6498	22	8331	0.00369419	0.0244359	mi_significant	0.368412	2.43248	1.4408	1.242	1.639	0.101	14.211	0	-0.0501	-0.055	-0.045	0.002	-20.64	0	0.4426	0.306	0.579	0.07	6.343	0	0.2896	0.177	0.402	0.057	5.056	0	1.1257	1.019	1.232	0.054	20.692	0	-0.1529
Cystic mastopathy	genitourinary	-0.5209	-2.813	1.771	1.169	-0.445	0.593986	0.0600246	5.87673	10	6521	10	8343	0.65599	0.836373	not_significant	-0.226224	0.183102	1.4333	1.235	1.632	0.101	14.149	0	-0.0498	-0.055	-0.045	0.002	-20.554	0	0.4425	0.306	0.579	0.07	6.343	0	0.29	0.178	0.402	0.057	5.064	0	1.1256	1.019	1.232	0.054	20.695	0	-0.1533
Cystitis	genitourinary	0.8246	0.034	1.615	0.404	2.043	2.28097	1.03458	5.02789	18	6513	12	8341	0.0410034	0.156008	not_significant	0.358119	1.38718	1.4367	1.238	1.635	0.101	14.175	0	-0.0499	-0.055	-0.045	0.002	-20.584	0	0.4409	0.304	0.578	0.07	6.319	0	0.2875	0.175	0.4	0.057	5.019	0	1.1258	1.019	1.232	0.054	20.695	0	-0.1539
Cystoid macular degeneration of retina	sense organs	1.0696	-0.133	2.272	0.614	1.743	2.91421	0.875465	9.69878	10	6521	10	8343	0.0813494	0.250119	not_significant	0.464521	1.08965	1.4355	1.237	1.634	0.101	14.169	0	-0.0499	-0.055	-0.045	0.002	-20.589	0	0.4423	0.306	0.579	0.07	6.339	0	0.2916	0.179	0.404	0.057	5.09	0	1.1274	1.021	1.234	0.054	20.722	0	-0.1522
Cysts of oral soft tissues	digestive	1.0106	-1.609	3.63	1.337	0.756	2.74725	0.200088	37.7128	10	6521	10	8343	0.449608	0.689289	not_significant	0.438898	0.347166	1.4331	1.235	1.632	0.101	14.146	0	-0.0498	-0.055	-0.045	0.002	-20.557	0	0.4431	0.306	0.58	0.07	6.351	0	0.2902	0.178	0.402	0.057	5.067	0	1.126	1.019	1.233	0.054	20.702	0	-0.153
Cysts of the jaws	digestive	-0.5119	-2.17	1.146	0.846	-0.605	0.599356	0.114178	3.14559	10	6521	10	8343	0.545147	0.764054	not_significant	-0.222315	0.263486	1.4332	1.235	1.632	0.101	14.148	0	-0.0498	-0.055	-0.045	0.002	-20.551	0	0.4423	0.306	0.579	0.07	6.341	0	0.2906	0.178	0.403	0.057	5.074	0	1.1255	1.019	1.232	0.054	20.691	0	-0.1537
Debility unspecified		1.3686	-0.431	3.168	0.918	1.491	3.92985	0.649859	23.7599	10	6521	10	8343	0.136029	0.342096	not_significant	0.594375	0.866369	1.435	1.236	1.634	0.101	14.162	0	-0.0499	-0.055	-0.045	0.002	-20.575	0	0.4438	0.307	0.581	0.07	6.361	0	0.2903	0.178	0.403	0.057	5.068	0	1.1262	1.02	1.233	0.054	20.703	0	-0.1523
Decreased libido	mental disorders	0.7549	0.528	0.982	0.116	6.518	2.1274	1.69554	2.66979	191	6340	148	8205	7.10768e-11	4.45621e-09	mi_significant	0.327849	10.1483	1.4394	1.24	1.638	0.102	14.18	0	-0.0505	-0.055	-0.046	0.002	-20.771	0	0.4373	0.3	0.574	0.07	6.255	0	0.2962	0.184	0.409	0.057	5.165	0	1.1391	1.032	1.246	0.055	20.895	0	-0.1518
Decreased white blood cell count	hematopoietic	0.2434	-0.064	0.551	0.157	1.551	1.27558	0.938005	1.73499	76	6455	104	8249	0.120787	0.31838	not_significant	0.105707	0.917979	1.4322	1.234	1.631	0.101	14.136	0	-0.0499	-0.055	-0.045	0.002	-20.571	0	0.4438	0.307	0.581	0.07	6.362	0	0.2909	0.179	0.403	0.057	5.079	0	1.1282	1.022	1.235	0.054	20.734	0	-0.1553
Decubitus ulcer	dermatologic	1.5279	0.43	2.626	0.56	2.727	4.60849	1.53726	13.8184	12	6519	10	8343	0.00639116	0.0374636	mi_significant	0.663559	2.19442	1.4336	1.235	1.632	0.101	14.152	0	-0.0499	-0.055	-0.045	0.002	-20.595	0	0.4422	0.305	0.579	0.07	6.336	0	0.2918	0.18	0.404	0.057	5.093	0	1.1293	1.023	1.236	0.054	20.751	0	-0.1513
Deep vein thrombosis [DVT]	circulatory system	0.6664	0.229	1.104	0.223	2.984	1.94721	1.25734	3.01621	52	6479	40	8313	0.00284809	0.0202588	mi_significant	0.289414	2.54545	1.4392	1.241	1.638	0.101	14.202	0	-0.0501	-0.055	-0.045	0.002	-20.629	0	0.442	0.305	0.579	0.07	6.333	0	0.2866	0.174	0.399	0.057	5.002	0	1.1247	1.018	1.231	0.054	20.672	0	-0.1549
Deficiency anemias	hematopoietic	1.3702	0.059	2.681	0.669	2.048	3.93614	1.06078	14.5997	10	6521	10	8343	0.0405275	0.155999	not_significant	0.59507	1.39225	1.4345	1.236	1.633	0.101	14.163	0	-0.0499	-0.055	-0.045	0.002	-20.587	0	0.4444	0.308	0.581	0.07	6.369	0	0.2896	0.177	0.402	0.057	5.056	0	1.1268	1.02	1.233	0.054	20.711	0	-0.1523
Deficiency of humoral immunity	endocrine/metabolic	1.0424	0.061	2.024	0.501	2.081	2.83602	1.0629	7.56854	12	6519	10	8343	0.0374208	0.150842	not_significant	0.452709	1.42689	1.4339	1.235	1.632	0.101	14.15	0	-0.0499	-0.055	-0.045	0.002	-20.57	0	0.4431	0.306	0.58	0.07	6.35	0	0.2906	0.178	0.403	0.057	5.074	0	1.1268	1.02	1.233	0.054	20.714	0	-0.1532
Degeneration of intervertebral disc	musculoskeletal	-0.0806	-0.27	0.109	0.097	-0.834	0.922563	0.763379	1.11516	181	6350	363	7990	0.404395	0.656538	not_significant	-0.0350041	0.393194	1.4282	1.229	1.627	0.101	14.076	0	-0.0496	-0.054	-0.045	0.002	-20.351	0	0.4404	0.304	0.577	0.07	6.309	0	0.2895	0.177	0.402	0.057	5.055	0	1.1233	1.017	1.23	0.054	20.623	0	-0.1537
Degenerative and vascular disorders of ear	sense organs	0.3936	-0.694	1.481	0.555	0.709	1.48231	0.499574	4.39734	10	6521	10	8343	0.478258	0.713183	not_significant	0.170938	0.320338	1.4326	1.234	1.631	0.101	14.142	0	-0.0499	-0.055	-0.045	0.002	-20.558	0	0.4438	0.307	0.581	0.07	6.36	0	0.2909	0.179	0.403	0.057	5.079	0	1.1266	1.02	1.233	0.054	20.708	0	-0.1525
Degenerative disease of the spinal cord	neurological	1.2641	0.569	1.96	0.355	3.562	3.53991	1.7665	7.09933	24	6507	14	8339	0.000368046	0.00371134	mi_significant	0.548992	3.4341	1.4459	1.247	1.645	0.101	14.263	0	-0.0502	-0.055	-0.045	0.002	-20.688	0	0.4392	0.302	0.576	0.07	6.293	0	0.2891	0.177	0.401	0.057	5.047	0	1.127	1.02	1.234	0.054	20.711	0	-0.1549
Degenerative skin conditions and other dermatoses	dermatologic	0.3177	-0.909	1.544	0.626	0.508	1.37396	0.402927	4.68329	10	6521	10	8343	0.611719	0.807044	not_significant	0.137975	0.213448	1.4345	1.236	1.633	0.101	14.154	0	-0.0499	-0.055	-0.045	0.002	-20.556	0	0.4424	0.306	0.579	0.07	6.341	0	0.2901	0.178	0.402	0.057	5.066	0	1.1257	1.019	1.232	0.054	20.696	0	-0.1533
Delirium dementia and amnestic and other cognitive disorders	mental disorders	0.2711	-2.279	2.821	1.301	0.208	1.31141	0.102387	16.7936	10	6521	10	8343	0.834946	0.927863	not_significant	0.117737	0.0783414	1.4332	1.235	1.632	0.101	14.148	0	-0.0498	-0.055	-0.045	0.002	-20.555	0	0.4427	0.306	0.579	0.07	6.346	0	0.2901	0.178	0.402	0.057	5.065	0	1.1258	1.019	1.232	0.054	20.699	0	-0.1534
Delirium due to conditions classified elsewhere	mental disorders	1.5771	0.14	3.014	0.733	2.151	4.8409	1.15027	20.3687	10	6521	10	8343	0.0314836	0.133921	not_significant	0.684926	1.50192	1.4388	1.24	1.638	0.101	14.195	0	-0.05	-0.055	-0.045	0.002	-20.6	0	0.4418	0.305	0.579	0.07	6.332	0	0.2886	0.176	0.401	0.057	5.039	0	1.1248	1.018	1.231	0.054	20.677	0	-0.1541
Dementias	mental disorders	1.5233	-0.892	3.938	1.232	1.236	4.58734	0.409835	51.3159	10	6521	10	8343	0.216384	0.452281	not_significant	0.661561	0.664775	1.4396	1.241	1.638	0.101	14.189	0	-0.05	-0.055	-0.045	0.002	-20.584	0	0.4413	0.305	0.578	0.07	6.325	0	0.29	0.178	0.402	0.057	5.063	0	1.1262	1.02	1.233	0.054	20.703	0	-0.1531
Dental caries	digestive	0.8076	-0.162	1.777	0.495	1.632	2.24252	0.850441	5.91209	10	6521	10	8343	0.102631	0.289615	not_significant	0.350736	0.988723	1.4346	1.236	1.633	0.101	14.159	0	-0.0499	-0.055	-0.045	0.002	-20.573	0	0.4424	0.306	0.579	0.07	6.341	0	0.2892	0.177	0.402	0.057	5.05	0	1.1267	1.02	1.233	0.054	20.713	0	-0.1534
Dependence on respirator [Ventilator] or supplemental oxygen	respiratory	1.9327	0.792	3.073	0.582	3.322	6.90814	2.20781	21.6066	16	6515	10	8343	0.000893496	0.00776158	mi_significant	0.839361	3.04891	1.4349	1.236	1.634	0.101	14.154	0	-0.05	-0.055	-0.045	0.002	-20.591	0	0.4448	0.308	0.582	0.07	6.374	0	0.2885	0.176	0.401	0.057	5.033	0	1.1288	1.022	1.235	0.054	20.74	0	-0.1514
Depression		-0.1239	-0.325	0.077	0.103	-1.208	0.883468	0.722527	1.08004	171	6360	290	8063	0.226934	0.46222	not_significant	-0.0538091	0.6441	1.4336	1.235	1.632	0.101	14.152	0	-0.0497	-0.054	-0.045	0.002	-20.49	0	0.4397	0.303	0.577	0.07	6.299	0	0.2882	0.176	0.401	0.057	5.031	0	1.1236	1.017	1.23	0.054	20.646	0	-0.1545
Dermatitis due to solar radiation	dermatologic	-0.1212	-0.907	0.665	0.401	-0.302	0.885857	0.403734	1.94449	12	6519	16	8337	0.762478	0.895666	not_significant	-0.0526365	0.117773	1.4326	1.234	1.631	0.101	14.141	0	-0.0498	-0.055	-0.045	0.002	-20.545	0	0.4429	0.306	0.58	0.07	6.348	0	0.2904	0.178	0.403	0.057	5.07	0	1.1261	1.02	1.233	0.054	20.701	0	-0.1533
Dermatochalasis	sense organs	0.5426	-0.403	1.488	0.483	1.124	1.72047	0.668312	4.42823	10	6521	15	8338	0.260815	0.504096	not_significant	0.235648	0.583667	1.439	1.24	1.638	0.101	14.186	0	-0.05	-0.055	-0.045	0.002	-20.579	0	0.4438	0.307	0.58	0.07	6.36	0	0.2912	0.179	0.403	0.057	5.084	0	1.1275	1.021	1.234	0.054	20.719	0	-0.1522
Dermatomycoses	infectious diseases	-0.0533	-0.381	0.275	0.167	-0.319	0.948096	0.683178	1.31653	63	6468	103	8250	0.750014	0.892343	not_significant	-0.0231479	0.124931	1.4333	1.235	1.632	0.101	14.148	0	-0.0498	-0.055	-0.045	0.002	-20.543	0	0.442	0.305	0.579	0.07	6.334	0	0.2898	0.177	0.402	0.057	5.059	0	1.1253	1.019	1.232	0.054	20.678	0	-0.1536
Dermatomyositis	dermatologic	0.6034	-1.412	2.619	1.028	0.587	1.82832	0.243655	13.722	10	6521	10	8343	0.557282	0.772628	not_significant	0.262053	0.253925	1.433	1.234	1.632	0.101	14.145	0	-0.0498	-0.055	-0.045	0.002	-20.552	0	0.4427	0.306	0.579	0.07	6.346	0	0.29	0.178	0.402	0.057	5.063	0	1.1258	1.019	1.232	0.054	20.699	0	-0.1538
Dermatophytosis	infectious diseases	-0.0219	-0.483	0.439	0.235	-0.093	0.978338	0.61693	1.55116	33	6498	49	8304	0.925979	0.971806	not_significant	-0.00951105	0.033399	1.4331	1.235	1.632	0.101	14.146	0	-0.0498	-0.055	-0.045	0.002	-20.551	0	0.4426	0.306	0.579	0.07	6.342	0	0.2901	0.178	0.402	0.057	5.065	0	1.1257	1.019	1.232	0.054	20.691	0	-0.1535
Dermatophytosis of nail	infectious diseases	-0.1829	-0.405	0.04	0.114	-1.611	0.832851	0.666977	1.04081	129	6402	254	8099	0.107091	0.297235	not_significant	-0.0794325	0.970246	1.4332	1.235	1.632	0.101	14.147	0	-0.0497	-0.054	-0.045	0.002	-20.468	0	0.439	0.302	0.576	0.07	6.29	0	0.2877	0.175	0.4	0.057	5.021	0	1.1214	1.015	1.228	0.054	20.591	0	-0.1546
Dermatophytosis of the body	infectious diseases	-0.2433	-0.498	0.011	0.13	-1.874	0.784036	0.607745	1.01106	97	6434	197	8156	0.0608718	0.203659	not_significant	-0.105664	1.21558	1.4363	1.238	1.635	0.101	14.175	0	-0.0497	-0.055	-0.045	0.002	-20.515	0	0.438	0.301	0.575	0.07	6.274	0	0.2873	0.175	0.4	0.057	5.015	0	1.1215	1.015	1.228	0.054	20.601	0	-0.1537
Develomental delays and disorders	mental disorders	1.0416	0.037	2.046	0.512	2.032	2.83375	1.03769	7.73689	12	6519	10	8343	0.0421049	0.158525	not_significant	0.452361	1.37567	1.4368	1.238	1.635	0.101	14.183	0	-0.0499	-0.055	-0.045	0.002	-20.595	0	0.4433	0.307	0.58	0.07	6.353	0	0.2889	0.177	0.401	0.057	5.044	0	1.125	1.018	1.232	0.054	20.681	0	-0.1544
Diabetes insipidus	endocrine/metabolic	0.7958	-0.67	2.261	0.748	1.064	2.21621	0.511709	9.59268	10	6521	10	8343	0.287249	0.525652	not_significant	0.345612	0.541741	1.4336	1.235	1.632	0.101	14.152	0	-0.0498	-0.055	-0.045	0.002	-20.559	0	0.4421	0.305	0.579	0.07	6.338	0	0.2902	0.178	0.402	0.057	5.068	0	1.1256	1.019	1.232	0.054	20.693	0	-0.1543
Diabetes mellitus	endocrine/metabolic	0.8647	0.117	1.613	0.382	2.266	2.37429	1.12412	5.01784	18	6513	13	8340	0.0234474	0.105331	not_significant	0.375534	1.62991	1.4372	1.239	1.636	0.101	14.184	0	-0.05	-0.055	-0.045	0.002	-20.611	0	0.4441	0.307	0.581	0.07	6.364	0	0.2898	0.178	0.402	0.057	5.059	0	1.1271	1.02	1.234	0.054	20.717	0	-0.1521
Diabetes type 1 with peripheral circulatory disorders	endocrine/metabolic	0.7464	-1.088	2.58	0.936	0.798	2.10939	0.33689	13.1971	10	6521	10	8343	0.425107	0.673061	not_significant	0.324157	0.371502	1.4329	1.234	1.631	0.101	14.144	0	-0.0498	-0.055	-0.045	0.002	-20.551	0	0.4421	0.305	0.579	0.07	6.337	0	0.2902	0.178	0.402	0.057	5.068	0	1.1256	1.019	1.232	0.054	20.695	0	-0.1539
Diabetes type 2 with peripheral circulatory disorders	endocrine/metabolic	1.5781	0.673	2.483	0.462	3.419	4.84574	1.96011	11.9771	13	6518	10	8343	0.000628628	0.00577436	mi_significant	0.68536	3.20161	1.4531	1.254	1.652	0.101	14.32	0	-0.0504	-0.055	-0.046	0.002	-20.725	0	0.4433	0.307	0.58	0.07	6.353	0	0.2875	0.175	0.4	0.057	5.018	0	1.126	1.019	1.233	0.054	20.696	0	-0.1571
Diabetic retinopathy	endocrine/metabolic	1.3214	0.681	1.962	0.327	4.045	3.74867	1.97585	7.11354	31	6500	16	8337	5.24058e-05	0.000662887	mi_significant	0.573877	4.28062	1.4471	1.248	1.646	0.101	14.262	0	-0.0503	-0.055	-0.046	0.002	-20.706	0	0.4382	0.301	0.575	0.07	6.275	0	0.2948	0.182	0.407	0.057	5.145	0	1.1282	1.022	1.235	0.054	20.731	0	-0.1524
Diaphragmatic hernia	digestive	0.1495	-0.182	0.481	0.169	0.883	1.16125	0.833601	1.61769	63	6468	99	8254	0.377084	0.630369	not_significant	0.064927	0.423562	1.436	1.237	1.635	0.101	14.167	0	-0.05	-0.055	-0.045	0.002	-20.566	0	0.4434	0.307	0.58	0.07	6.355	0	0.2906	0.178	0.403	0.057	5.074	0	1.1272	1.021	1.234	0.054	20.715	0	-0.1529
Diarrhea	digestive	0.0121	-0.153	0.177	0.084	0.143	1.01217	0.85813	1.19363	276	6255	388	7965	0.886399	0.952449	not_significant	0.00525496	0.0523709	1.4326	1.234	1.631	0.101	14.136	0	-0.0498	-0.055	-0.045	0.002	-20.553	0	0.443	0.306	0.58	0.07	6.348	0	0.2902	0.178	0.402	0.057	5.067	0	1.126	1.019	1.233	0.054	20.696	0	-0.1534
Difficulty in walking	musculoskeletal	0.5623	-0.021	1.145	0.298	1.89	1.7547	0.979219	3.14244	26	6505	24	8329	0.0587845	0.200392	not_significant	0.244204	1.23074	1.4362	1.238	1.635	0.101	14.179	0	-0.0499	-0.055	-0.045	0.002	-20.594	0	0.4417	0.305	0.578	0.07	6.331	0	0.283	0.171	0.396	0.057	4.93	0	1.1267	1.02	1.233	0.054	20.713	0	-0.1532
Diplopia and disorders of binocular vision	sense organs	0.3394	-0.324	1.003	0.338	1.003	1.4041	0.72325	2.72645	18	6513	21	8332	0.316035	0.56262	not_significant	0.1474	0.500265	1.4338	1.235	1.632	0.101	14.153	0	-0.0499	-0.055	-0.045	0.002	-20.571	0	0.4431	0.306	0.58	0.07	6.352	0	0.2912	0.179	0.403	0.057	5.084	0	1.1271	1.02	1.234	0.054	20.716	0	-0.1521
Disease of capillaries	circulatory system	-0.8207	-1.469	-0.173	0.331	-2.482	0.440123	0.230156	0.841138	13	6518	41	8312	0.0130757	0.0656795	not_significant	-0.356425	1.88354	1.4306	1.232	1.629	0.101	14.118	0	-0.0497	-0.054	-0.045	0.002	-20.49	0	0.4413	0.305	0.578	0.07	6.326	0	0.2928	0.18	0.405	0.057	5.11	0	1.1256	1.019	1.232	0.054	20.692	0	-0.1544
Disease of tricuspid valve	circulatory system	1.6107	0.444	2.778	0.596	2.705	5.00631	1.55893	16.0868	11	6520	10	8343	0.0068365	0.0394329	mi_significant	0.699518	2.16517	1.4394	1.241	1.638	0.101	14.213	0	-0.05	-0.055	-0.045	0.002	-20.637	0	0.4432	0.306	0.58	0.07	6.353	0	0.2867	0.174	0.399	0.057	5.003	0	1.127	1.02	1.234	0.054	20.715	0	-0.153
Diseases and other conditions of the tongue	digestive	-0.0923	-0.808	0.623	0.365	-0.253	0.911832	0.445749	1.86451	12	6519	24	8329	0.800415	0.917487	not_significant	-0.0400854	0.0966847	1.4328	1.234	1.631	0.101	14.144	0	-0.0498	-0.055	-0.045	0.002	-20.546	0	0.4426	0.306	0.579	0.07	6.344	0	0.2903	0.178	0.403	0.057	5.069	0	1.1257	1.019	1.232	0.054	20.695	0	-0.1533
Diseases due to other mycobacteria	infectious diseases	1.5409	-0.117	3.199	0.846	1.821	4.66879	0.889585	24.508	10	6521	10	8343	0.0685549	0.223148	not_significant	0.669204	1.16396	1.4315	1.233	1.63	0.101	14.128	0	-0.0498	-0.055	-0.045	0.002	-20.546	0	0.4428	0.306	0.58	0.07	6.347	0	0.2894	0.177	0.402	0.057	5.052	0	1.1265	1.02	1.233	0.054	20.71	0	-0.1527
Diseases of esophagus	digestive	-0.7087	-1.647	0.23	0.479	-1.48	0.492284	0.192627	1.2586	10	6521	17	8336	0.13877	0.344417	not_significant	-0.307784	0.857704	1.4337	1.235	1.632	0.101	14.15	0	-0.0498	-0.055	-0.045	0.002	-20.54	0	0.4416	0.305	0.578	0.07	6.33	0	0.2894	0.177	0.402	0.057	5.053	0	1.1257	1.019	1.232	0.054	20.695	0	-0.1545
Diseases of hair and hair follicles	dermatologic	-0.2746	-0.528	-0.021	0.129	-2.122	0.759876	0.589783	0.979219	101	6430	193	8160	0.0338711	0.141983	not_significant	-0.119257	1.47017	1.4328	1.234	1.631	0.101	14.142	0	-0.0498	-0.055	-0.045	0.002	-20.534	0	0.4441	0.307	0.581	0.07	6.365	0	0.2951	0.183	0.407	0.057	5.149	0	1.1286	1.022	1.235	0.054	20.742	0	-0.1461
Diseases of lips	digestive	-0.2294	-0.78	0.321	0.281	-0.817	0.79501	0.458406	1.37851	21	6510	41	8312	0.413778	0.666667	not_significant	-0.0996272	0.383233	1.4337	1.235	1.632	0.101	14.151	0	-0.0498	-0.055	-0.045	0.002	-20.541	0	0.4413	0.305	0.578	0.07	6.325	0	0.2901	0.178	0.402	0.057	5.065	0	1.1247	1.018	1.231	0.054	20.671	0	-0.1542
Diseases of nail, NOS	dermatologic	-0.1379	-0.483	0.207	0.176	-0.784	0.871186	0.61693	1.22998	53	6478	105	8248	0.43291	0.679493	not_significant	-0.0598892	0.363602	1.4328	1.234	1.631	0.101	14.143	0	-0.0498	-0.055	-0.045	0.002	-20.513	0	0.4412	0.304	0.578	0.07	6.322	0	0.2892	0.177	0.401	0.057	5.049	0	1.1241	1.017	1.231	0.054	20.652	0	-0.1541
Diseases of pancreas	digestive	1.1175	0.448	1.787	0.342	3.271	3.0572	1.56518	5.97151	32	6499	14	8339	0.0010707	0.00887328	mi_significant	0.485324	2.97033	1.4313	1.233	1.63	0.101	14.124	0	-0.0498	-0.055	-0.045	0.002	-20.539	0	0.4397	0.303	0.577	0.07	6.302	0	0.2852	0.173	0.398	0.057	4.976	0	1.125	1.018	1.232	0.054	20.68	0	-0.1553
Diseases of spleen	hematopoietic	0.9129	-0.058	1.884	0.496	1.842	2.49154	0.94365	6.57977	11	6520	10	8343	0.0654643	0.216513	not_significant	0.396467	1.184	1.4347	1.236	1.633	0.101	14.159	0	-0.0499	-0.055	-0.045	0.002	-20.57	0	0.4415	0.305	0.578	0.07	6.327	0	0.2881	0.176	0.4	0.057	5.03	0	1.1264	1.02	1.233	0.054	20.708	0	-0.1534
Diseases of the jaws	digestive	0.0247	-0.528	0.577	0.282	0.088	1.02501	0.589783	1.78069	22	6509	37	8316	0.930055	0.972685	not_significant	0.0107271	0.0314914	1.4331	1.235	1.632	0.101	14.146	0	-0.0498	-0.055	-0.045	0.002	-20.547	0	0.4428	0.306	0.58	0.07	6.347	0	0.2902	0.178	0.402	0.057	5.068	0	1.1259	1.019	1.233	0.054	20.698	0	-0.1534
Diseases of the larynx and vocal cords	respiratory	0.0165	-0.572	0.605	0.3	0.055	1.01664	0.564396	1.83125	21	6510	30	8323	0.956137	0.982321	not_significant	0.00716586	0.0194798	1.4331	1.235	1.632	0.101	14.143	0	-0.0498	-0.055	-0.045	0.002	-20.542	0	0.4427	0.306	0.579	0.07	6.346	0	0.2902	0.178	0.402	0.057	5.068	0	1.1258	1.019	1.232	0.054	20.697	0	-0.1534
Diseases of the oral soft tissues, excluding lesions specific for gingiva and tongue	digestive	-0.1953	-0.567	0.177	0.19	-1.029	0.822588	0.567225	1.19363	48	6483	85	8268	0.303263	0.547315	not_significant	-0.0848177	0.518181	1.435	1.236	1.634	0.101	14.162	0	-0.0498	-0.055	-0.045	0.002	-20.548	0	0.4417	0.305	0.578	0.07	6.332	0	0.2897	0.177	0.402	0.057	5.057	0	1.1244	1.018	1.231	0.054	20.665	0	-0.1539
Diseases of the salivary glands	digestive	-0.3579	-2.781	2.065	1.236	-0.289	0.699143	0.0619765	7.8853	10	6521	10	8343	0.772211	0.900184	not_significant	-0.155434	0.112264	1.4333	1.235	1.632	0.101	14.148	0	-0.0498	-0.055	-0.045	0.002	-20.554	0	0.4426	0.306	0.579	0.07	6.344	0	0.2902	0.178	0.402	0.057	5.068	0	1.1257	1.019	1.232	0.054	20.696	0	-0.1534
Diseases of white blood cells	hematopoietic	0.1729	-0.989	1.335	0.593	0.292	1.18875	0.371948	3.8	10	6521	10	8343	0.770574	0.900184	not_significant	0.0750895	0.113186	1.4333	1.235	1.632	0.101	14.148	0	-0.0498	-0.055	-0.045	0.002	-20.555	0	0.4427	0.306	0.579	0.07	6.345	0	0.2902	0.178	0.402	0.057	5.068	0	1.1257	1.019	1.232	0.054	20.696	0	-0.1535
Dislocation	injuries & poisonings	-0.3123	-0.57	-0.055	0.131	-2.377	0.731762	0.565525	0.946485	97	6434	185	8168	0.0174746	0.0823825	not_significant	-0.13563	1.75759	1.4365	1.238	1.635	0.101	14.18	0	-0.0497	-0.054	-0.045	0.002	-20.49	0	0.4351	0.298	0.572	0.07	6.23	0	0.2871	0.175	0.399	0.057	5.01	0	1.122	1.015	1.229	0.054	20.614	0	-0.1576
Disorder of skin and subcutaneous tissue NOS	dermatologic	-0.4268	-0.577	-0.276	0.077	-5.559	0.652594	0.561581	0.758813	270	6261	673	7680	2.71456e-08	8.69867e-07	con_significant	-0.185357	7.5663	1.4329	1.234	1.632	0.101	14.143	0	-0.0488	-0.054	-0.044	0.002	-20.082	0	0.4099	0.273	0.547	0.07	5.855	0	0.2751	0.163	0.388	0.057	4.792	0	1.0967	0.99	1.204	0.055	20.065	0	-0.1644
Disorders involving the immune mechanism	endocrine/metabolic	1.2077	0.601	1.814	0.309	3.904	3.34578	1.82394	6.13494	48	6483	15	8338	9.45546e-05	0.00106522	mi_significant	0.524497	4.02432	1.4287	1.23	1.628	0.101	14.088	0	-0.0498	-0.055	-0.045	0.002	-20.495	0	0.4396	0.303	0.576	0.07	6.299	0	0.2838	0.171	0.396	0.057	4.951	0	1.121	1.014	1.228	0.054	20.598	0	-0.1556
Disorders of accommodation	sense organs	0.1901	-1.322	1.702	0.771	0.246	1.20937	0.266602	5.48491	10	6521	10	8343	0.80532	0.919705	not_significant	0.0825594	0.0940314	1.4325	1.234	1.631	0.101	14.138	0	-0.0498	-0.055	-0.045	0.002	-20.552	0	0.4432	0.306	0.58	0.07	6.35	0	0.2906	0.178	0.403	0.057	5.073	0	1.1263	1.02	1.233	0.054	20.696	0	-0.153
Disorders of acoustic nerve	sense organs	0.6842	-0.017	1.385	0.358	1.913	1.98219	0.983144	3.99483	18	6513	16	8337	0.0557876	0.196862	not_significant	0.297144	1.25346	1.4333	1.235	1.632	0.101	14.145	0	-0.0499	-0.055	-0.045	0.002	-20.56	0	0.4438	0.307	0.581	0.07	6.362	0	0.2902	0.178	0.402	0.057	5.067	0	1.1263	1.02	1.233	0.054	20.706	0	-0.1555
Disorders of adrenal glands	endocrine/metabolic	0.9055	0.071	1.74	0.426	2.126	2.47317	1.07358	5.69734	14	6517	11	8342	0.0334871	0.141194	not_significant	0.393254	1.47512	1.4391	1.24	1.638	0.101	14.199	0	-0.05	-0.055	-0.045	0.002	-20.612	0	0.4396	0.303	0.576	0.07	6.3	0	0.2901	0.178	0.402	0.057	5.065	0	1.1265	1.02	1.233	0.054	20.707	0	-0.1535
Disorders of bilirubin excretion	endocrine/metabolic	0.1443	-0.285	0.573	0.219	0.659	1.15523	0.752014	1.77358	39	6492	57	8296	0.510001	0.738817	not_significant	0.0626687	0.292429	1.4336	1.235	1.632	0.101	14.152	0	-0.0499	-0.055	-0.045	0.002	-20.564	0	0.4435	0.307	0.58	0.07	6.357	0	0.2903	0.178	0.402	0.057	5.069	0	1.1266	1.02	1.233	0.054	20.708	0	-0.1531
Disorders of calcium/phosphorus metabolism	endocrine/metabolic	0.4039	-0.428	1.236	0.425	0.951	1.49765	0.651811	3.44182	12	6519	13	8340	0.341378	0.591385	not_significant	0.175412	0.466765	1.4335	1.235	1.632	0.101	14.152	0	-0.0499	-0.055	-0.045	0.002	-20.568	0	0.4435	0.307	0.58	0.07	6.357	0	0.2904	0.178	0.403	0.057	5.07	0	1.1262	1.02	1.233	0.054	20.706	0	-0.153
Disorders of coccyx		-0.6023	-1.416	0.212	0.415	-1.45	0.547551	0.242683	1.23615	10	6521	25	8328	0.146938	0.357913	not_significant	-0.261576	0.832866	1.433	1.234	1.632	0.101	14.146	0	-0.0498	-0.055	-0.045	0.002	-20.538	0	0.4421	0.305	0.579	0.07	6.336	0	0.2906	0.178	0.403	0.057	5.074	0	1.1246	1.018	1.231	0.054	20.674	0	-0.1532
Disorders of conjunctiva	sense organs	-0.0878	-0.463	0.288	0.192	-0.459	0.915944	0.629393	1.33376	44	6487	85	8268	0.646576	0.829504	not_significant	-0.0381311	0.18938	1.4329	1.234	1.631	0.101	14.145	0	-0.0498	-0.055	-0.045	0.002	-20.529	0	0.4421	0.305	0.579	0.07	6.337	0	0.2894	0.177	0.402	0.057	5.05	0	1.1248	1.018	1.231	0.054	20.662	0	-0.1537
Disorders of diaphragm	respiratory	1.074	0.222	1.926	0.435	2.472	2.92706	1.24857	6.86201	17	6514	10	8343	0.0134523	0.066782	not_significant	0.466432	1.8712	1.4411	1.242	1.64	0.101	14.216	0	-0.0501	-0.055	-0.045	0.002	-20.637	0	0.4418	0.305	0.579	0.07	6.332	0	0.2904	0.178	0.403	0.057	5.07	0	1.1256	1.019	1.232	0.054	20.691	0	-0.1521
Disorders of esophageal motility	digestive	0.0274	-0.703	0.758	0.373	0.074	1.02778	0.495098	2.134	13	6518	20	8333	0.941354	0.975394	not_significant	0.0118997	0.0262472	1.4329	1.234	1.631	0.101	14.145	0	-0.0498	-0.055	-0.045	0.002	-20.552	0	0.4428	0.306	0.58	0.07	6.346	0	0.2902	0.178	0.402	0.057	5.068	0	1.1259	1.019	1.233	0.054	20.696	0	-0.1533
Disorders of external ear	sense organs	-0.217	-0.747	0.313	0.27	-0.803	0.80493	0.473786	1.36752	21	6510	49	8304	0.422236	0.672035	not_significant	-0.0942419	0.374445	1.4304	1.232	1.629	0.101	14.114	0	-0.0498	-0.055	-0.045	0.002	-20.505	0	0.4425	0.306	0.579	0.07	6.343	0	0.2912	0.179	0.403	0.057	5.084	0	1.1257	1.019	1.232	0.054	20.697	0	-0.1526
Disorders of iris and ciliary body	sense organs	0.3277	-0.738	1.393	0.544	0.603	1.38777	0.478069	4.02691	10	6521	10	8343	0.546563	0.765189	not_significant	0.142318	0.262359	1.4335	1.235	1.632	0.101	14.15	0	-0.0499	-0.055	-0.045	0.002	-20.56	0	0.4426	0.306	0.579	0.07	6.344	0	0.2907	0.178	0.403	0.057	5.076	0	1.1265	1.02	1.233	0.054	20.707	0	-0.1532
Disorders of iron metabolism	hematopoietic	0.5026	-0.079	1.084	0.297	1.694	1.65301	0.92404	2.95648	31	6500	23	8330	0.090334	0.268645	not_significant	0.218276	1.04415	1.4311	1.233	1.63	0.101	14.126	0	-0.0498	-0.055	-0.045	0.002	-20.549	0	0.443	0.306	0.58	0.07	6.35	0	0.291	0.179	0.403	0.057	5.081	0	1.1254	1.019	1.232	0.054	20.688	0	-0.1536
Disorders of lacrimal system	sense organs	1.4914	-0.147	3.129	0.836	1.785	4.44331	0.863294	22.8511	10	6521	10	8343	0.0743299	0.234538	not_significant	0.647707	1.12884	1.4345	1.236	1.633	0.101	14.155	0	-0.0499	-0.055	-0.045	0.002	-20.571	0	0.4429	0.306	0.58	0.07	6.347	0	0.2902	0.178	0.402	0.057	5.066	0	1.1262	1.02	1.233	0.054	20.703	0	-0.1525
Disorders of magnesium metabolism	endocrine/metabolic	1.4941	0.882	2.107	0.312	4.781	4.45532	2.41573	8.22353	58	6473	14	8339	1.74056e-06	3.4382e-05	mi_significant	0.648879	5.75931	1.4318	1.233	1.631	0.101	14.11	0	-0.0499	-0.055	-0.045	0.002	-20.523	0	0.4317	0.295	0.569	0.07	6.178	0	0.284	0.172	0.396	0.057	4.954	0	1.1201	1.013	1.227	0.054	20.577	0	-0.1543
Disorders of mineral metabolism	endocrine/metabolic	2.133	0.5	3.766	0.833	2.56	8.44015	1.64872	43.2069	10	6521	10	8343	0.0104744	0.0551245	not_significant	0.92635	1.97987	1.4403	1.242	1.639	0.101	14.205	0	-0.05	-0.055	-0.045	0.002	-20.609	0	0.4429	0.306	0.58	0.07	6.349	0	0.2881	0.176	0.4	0.057	5.029	0	1.1253	1.019	1.232	0.054	20.685	0	-0.1549
Disorders of muscle, ligament, and fascia	musculoskeletal	0.4668	-0.363	1.297	0.424	1.102	1.59488	0.695586	3.65831	12	6519	13	8340	0.270395	0.51233	not_significant	0.202729	0.568001	1.4356	1.237	1.634	0.101	14.166	0	-0.0499	-0.055	-0.045	0.002	-20.573	0	0.4424	0.306	0.579	0.07	6.341	0	0.2902	0.178	0.402	0.057	5.068	0	1.1257	1.019	1.232	0.054	20.696	0	-0.1536
Disorders of optic nerve and visual pathways	sense organs	0.4662	-0.608	1.54	0.548	0.851	1.59393	0.544439	4.66459	10	6521	10	8343	0.394841	0.649214	not_significant	0.202468	0.403578	1.4346	1.236	1.633	0.101	14.157	0	-0.0499	-0.055	-0.045	0.002	-20.564	0	0.4422	0.305	0.579	0.07	6.339	0	0.2901	0.178	0.402	0.057	5.066	0	1.1254	1.019	1.232	0.054	20.691	0	-0.1539
Disorders of other cranial nerves	neurological	0.5942	-1.233	2.421	0.932	0.638	1.81158	0.291417	11.2571	10	6521	10	8343	0.523779	0.750039	not_significant	0.258058	0.280852	1.433	1.234	1.632	0.101	14.145	0	-0.0498	-0.055	-0.045	0.002	-20.554	0	0.4425	0.306	0.579	0.07	6.343	0	0.29	0.178	0.402	0.057	5.063	0	1.1259	1.019	1.233	0.054	20.701	0	-0.1531
Disorders of penis	genitourinary	0.1372	-0.139	0.413	0.141	0.974	1.14706	0.870228	1.51135	104	6427	125	8228	0.329946	0.579516	not_significant	0.0595852	0.481557	1.4311	1.233	1.63	0.101	14.126	0	-0.0498	-0.055	-0.045	0.002	-20.561	0	0.444	0.307	0.581	0.07	6.363	0	0.2902	0.178	0.402	0.057	5.068	0	1.1267	1.02	1.233	0.054	20.711	0	-0.1529
Disorders of phosphorus metabolism	endocrine/metabolic	1.347	0.723	1.971	0.318	4.232	3.84587	2.06061	7.17785	40	6491	16	8337	2.31559e-05	0.000330468	mi_significant	0.584995	4.63534	1.44	1.241	1.639	0.101	14.203	0	-0.0501	-0.055	-0.045	0.002	-20.654	0	0.4391	0.302	0.576	0.07	6.288	0	0.2886	0.176	0.401	0.057	5.035	0	1.1282	1.021	1.235	0.054	20.725	0	-0.1504
Disorders of plasma protein metabolism		0.474	-2.895	3.843	1.719	0.276	1.60641	0.055299	46.6653	10	6521	10	8343	0.782705	0.907283	not_significant	0.205856	0.106402	1.4334	1.235	1.632	0.101	14.149	0	-0.0498	-0.055	-0.045	0.002	-20.555	0	0.4425	0.306	0.579	0.07	6.343	0	0.2902	0.178	0.402	0.057	5.068	0	1.1257	1.019	1.232	0.054	20.697	0	-0.1534
Disorders of refraction and accommodation; blindness and low vision	sense organs	0.2506	-0.319	0.82	0.291	0.862	1.2848	0.726876	2.2705	21	6510	34	8319	0.38844	0.643828	not_significant	0.108834	0.410676	1.4347	1.236	1.633	0.101	14.16	0	-0.0499	-0.055	-0.045	0.002	-20.57	0	0.4436	0.307	0.58	0.07	6.358	0	0.2902	0.178	0.402	0.057	5.068	0	1.1265	1.02	1.233	0.054	20.709	0	-0.1541
Disorders of sacrum	musculoskeletal	-0.3574	-0.848	0.133	0.25	-1.427	0.699493	0.428271	1.14225	25	6506	55	8298	0.153456	0.368805	not_significant	-0.155217	0.814017	1.4331	1.235	1.632	0.101	14.146	0	-0.0498	-0.055	-0.045	0.002	-20.537	0	0.4414	0.305	0.578	0.07	6.327	0	0.2916	0.179	0.404	0.057	5.091	0	1.1252	1.019	1.232	0.054	20.687	0	-0.1527
Disorders of sweat glands	dermatologic	-0.5832	-1.672	0.506	0.556	-1.05	0.55811	0.187871	1.65864	10	6521	12	8341	0.293891	0.535089	not_significant	-0.253281	0.531814	1.4344	1.236	1.633	0.101	14.159	0	-0.0498	-0.055	-0.045	0.002	-20.558	0	0.4418	0.305	0.579	0.07	6.332	0	0.2895	0.177	0.402	0.057	5.054	0	1.1254	1.019	1.232	0.054	20.69	0	-0.1534
Disorders of the autonomic nervous system	neurological	0.7162	-0.29	1.722	0.513	1.395	2.04664	0.748264	5.59571	10	6521	10	8343	0.162905	0.384467	not_significant	0.311042	0.788065	1.4315	1.233	1.63	0.101	14.131	0	-0.0498	-0.055	-0.045	0.002	-20.553	0	0.4434	0.307	0.58	0.07	6.356	0	0.2901	0.178	0.402	0.057	5.065	0	1.1267	1.02	1.233	0.054	20.713	0	-0.1528
Disorders of the globe	sense organs	1.9072	-0.328	4.143	1.141	1.672	6.73421	0.720363	62.9915	10	6521	10	8343	0.0945094	0.276997	not_significant	0.828286	1.02452	1.4347	1.236	1.633	0.101	14.158	0	-0.0499	-0.055	-0.045	0.002	-20.57	0	0.4435	0.307	0.58	0.07	6.357	0	0.2897	0.177	0.402	0.057	5.058	0	1.1262	1.02	1.233	0.054	20.703	0	-0.153
Disorders of the orbit	sense organs	0.0827	-1.083	1.249	0.595	0.139	1.08622	0.338578	3.48685	10	6521	10	8343	0.889393	0.954344	not_significant	0.0359162	0.0509065	1.433	1.234	1.632	0.101	14.146	0	-0.0498	-0.055	-0.045	0.002	-20.553	0	0.4426	0.306	0.579	0.07	6.344	0	0.2902	0.178	0.402	0.057	5.068	0	1.1259	1.019	1.232	0.054	20.7	0	-0.1534
Disorders of the pituitary gland and its hypothalamic control	endocrine/metabolic	1.7439	0.937	2.551	0.412	4.237	5.71961	2.55231	12.8199	29	6502	10	8343	2.26618e-05	0.000326783	mi_significant	0.757366	4.64471	1.4356	1.237	1.634	0.101	14.165	0	-0.0499	-0.055	-0.045	0.002	-20.582	0	0.4408	0.304	0.578	0.07	6.317	0	0.2885	0.176	0.401	0.057	5.036	0	1.1243	1.018	1.231	0.054	20.665	0	-0.159
Disorders of vitreous body	sense organs	0.1115	-0.282	0.505	0.201	0.555	1.11795	0.754274	1.65699	44	6487	75	8278	0.578639	0.787911	not_significant	0.0484238	0.237592	1.4359	1.237	1.635	0.101	14.156	0	-0.0499	-0.055	-0.045	0.002	-20.541	0	0.4408	0.304	0.578	0.07	6.312	0	0.2906	0.178	0.403	0.057	5.074	0	1.1263	1.02	1.233	0.054	20.705	0	-0.1533
Displacement of intervertebral disc	musculoskeletal	-0.2893	-0.528	-0.051	0.122	-2.377	0.748788	0.589783	0.950279	108	6423	238	8115	0.0174749	0.0823825	not_significant	-0.125641	1.75759	1.428	1.229	1.627	0.101	14.094	0	-0.0495	-0.054	-0.045	0.002	-20.4	0	0.4402	0.303	0.577	0.07	6.31	0	0.2889	0.177	0.401	0.057	5.044	0	1.1221	1.015	1.229	0.054	20.621	0	-0.1528
Dissociative disorder	mental disorders	-0.5185	-2.97	1.933	1.251	-0.415	0.595413	0.0513033	6.91021	10	6521	10	8343	0.678474	0.852972	not_significant	-0.225182	0.168467	1.4328	1.234	1.631	0.101	14.145	0	-0.0498	-0.055	-0.045	0.002	-20.549	0	0.4429	0.306	0.58	0.07	6.349	0	0.29	0.178	0.402	0.057	5.064	0	1.1258	1.019	1.232	0.054	20.699	0	-0.1536
Disturbance of salivary secretion	digestive	-0.8366	-1.64	-0.033	0.41	-2.04	0.433181	0.19398	0.967539	10	6521	32	8321	0.0413045	0.15669	not_significant	-0.363331	1.384	1.4309	1.232	1.63	0.101	14.117	0	-0.0497	-0.054	-0.045	0.002	-20.493	0	0.4414	0.305	0.578	0.07	6.326	0	0.2888	0.177	0.401	0.057	5.042	0	1.1251	1.018	1.232	0.054	20.682	0	-0.1531
Disturbance of skin sensation	dermatologic	-0.1341	-0.309	0.041	0.089	-1.502	0.874503	0.734181	1.04185	219	6312	404	7949	0.133132	0.33621	not_significant	-0.0582389	0.875718	1.4307	1.232	1.629	0.101	14.124	0	-0.0496	-0.054	-0.045	0.002	-20.399	0	0.4381	0.301	0.575	0.07	6.275	0	0.2879	0.176	0.4	0.057	5.025	0	1.1209	1.014	1.228	0.054	20.571	0	-0.1559
Disturbances in tooth eruption	digestive	-0.5581	-2.839	1.723	1.164	-0.479	0.572295	0.0584841	5.60131	10	6521	10	8343	0.631589	0.820497	not_significant	-0.24238	0.199566	1.433	1.234	1.632	0.101	14.146	0	-0.0498	-0.055	-0.045	0.002	-20.553	0	0.4431	0.306	0.58	0.07	6.352	0	0.2902	0.178	0.402	0.057	5.068	0	1.1258	1.019	1.232	0.054	20.699	0	-0.1531
Disturbances of amino-acid transport	endocrine/metabolic	0.1745	-1.834	2.183	1.025	0.17	1.19065	0.159773	8.87289	10	6521	10	8343	0.864734	0.939674	not_significant	0.0757844	0.0631173	1.4328	1.234	1.631	0.101	14.142	0	-0.0498	-0.055	-0.045	0.002	-20.548	0	0.4427	0.306	0.579	0.07	6.346	0	0.2901	0.178	0.402	0.057	5.065	0	1.1258	1.019	1.232	0.054	20.699	0	-0.1535
Disturbances of sensation of smell and taste	neurological	-0.2865	-0.789	0.216	0.256	-1.118	0.750887	0.454299	1.2411	24	6507	54	8299	0.263469	0.505889	not_significant	-0.124425	0.57927	1.4323	1.234	1.631	0.101	14.138	0	-0.0498	-0.055	-0.045	0.002	-20.529	0	0.4422	0.305	0.579	0.07	6.338	0	0.2902	0.178	0.402	0.057	5.067	0	1.1252	1.019	1.232	0.054	20.687	0	-0.1525
Disturbances of sulphur-bearing amino-acid metabolism	endocrine/metabolic	0.1173	-1.074	1.309	0.608	0.193	1.12446	0.341639	3.70247	10	6521	10	8343	0.846965	0.933772	not_significant	0.0509427	0.0721345	1.433	1.234	1.632	0.101	14.146	0	-0.0498	-0.055	-0.045	0.002	-20.554	0	0.4428	0.306	0.579	0.07	6.347	0	0.2902	0.178	0.402	0.057	5.068	0	1.1259	1.019	1.232	0.054	20.7	0	-0.1534
Diverticulitis	digestive	-0.672	-1.228	-0.116	0.284	-2.369	0.510686	0.292878	0.890475	17	6514	59	8294	0.0178391	0.0835196	not_significant	-0.291846	1.74863	1.4242	1.226	1.623	0.101	14.054	0	-0.0495	-0.054	-0.045	0.002	-20.399	0	0.4398	0.303	0.577	0.07	6.304	0	0.2912	0.179	0.404	0.057	5.084	0	1.124	1.017	1.231	0.054	20.66	0	-0.1549
Diverticulosis	digestive	-0.2798	-0.599	0.039	0.163	-1.72	0.755935	0.549361	1.03977	57	6474	155	8198	0.085385	0.257584	not_significant	-0.121516	1.06862	1.4154	1.216	1.615	0.102	13.905	0	-0.0493	-0.054	-0.044	0.002	-20.146	0	0.4422	0.305	0.579	0.07	6.338	0	0.2903	0.178	0.403	0.057	5.069	0	1.1232	1.017	1.23	0.054	20.642	0	-0.1555
Dizziness and giddiness (Light-headedness and vertigo)	sense organs	-0.104	-0.299	0.091	0.1	-1.044	0.901225	0.741559	1.09527	176	6355	319	8034	0.296588	0.537285	not_significant	-0.0451666	0.527847	1.4321	1.234	1.631	0.101	14.136	0	-0.0497	-0.054	-0.045	0.002	-20.474	0	0.4406	0.304	0.577	0.07	6.313	0	0.2893	0.177	0.402	0.057	5.05	0	1.1235	1.017	1.23	0.054	20.641	0	-0.1533
Drusen (degenerative) of retina	sense organs	0.9705	-0.226	2.168	0.611	1.589	2.63926	0.797718	8.74078	10	6521	10	8343	0.112026	0.30308	not_significant	0.421483	0.950681	1.4393	1.241	1.638	0.101	14.198	0	-0.05	-0.055	-0.045	0.002	-20.605	0	0.4426	0.306	0.579	0.07	6.345	0	0.2906	0.178	0.403	0.057	5.075	0	1.1269	1.02	1.234	0.054	20.714	0	-0.1537
Dry eyes	sense organs	0.0961	-0.237	0.429	0.17	0.565	1.10087	0.788991	1.53572	63	6468	97	8256	0.572022	0.781898	not_significant	0.0417357	0.242587	1.4345	1.236	1.633	0.101	14.156	0	-0.0499	-0.055	-0.045	0.002	-20.552	0	0.4422	0.306	0.579	0.07	6.339	0	0.291	0.179	0.403	0.057	5.079	0	1.1266	1.02	1.233	0.054	20.706	0	-0.153
Duodenal ulcer	digestive	0.2681	-0.593	1.129	0.439	0.61	1.30748	0.552667	3.09256	10	6521	13	8340	0.541789	0.763695	not_significant	0.116434	0.26617	1.4337	1.235	1.632	0.101	14.153	0	-0.0499	-0.055	-0.045	0.002	-20.561	0	0.4428	0.306	0.579	0.07	6.347	0	0.2901	0.178	0.402	0.057	5.066	0	1.1259	1.019	1.232	0.054	20.7	0	-0.1536
Duodenitis	digestive	-0.3312	-1.089	0.427	0.387	-0.857	0.718062	0.336553	1.53265	12	6519	21	8332	0.391687	0.646978	not_significant	-0.143838	0.407061	1.4327	1.234	1.631	0.101	14.143	0	-0.0498	-0.055	-0.045	0.002	-20.539	0	0.4421	0.305	0.579	0.07	6.337	0	0.2899	0.178	0.402	0.057	5.062	0	1.126	1.019	1.233	0.054	20.702	0	-0.1538
Dyshidrosis	dermatologic	-0.523	-1.043	-0.003	0.266	-1.969	0.59274	0.352396	0.997004	22	6509	50	8303	0.0489005	0.179426	not_significant	-0.227136	1.31069	1.4364	1.238	1.635	0.101	14.178	0	-0.0498	-0.055	-0.045	0.002	-20.548	0	0.4403	0.304	0.577	0.07	6.31	0	0.288	0.176	0.4	0.057	5.027	0	1.1239	1.017	1.231	0.054	20.657	0	-0.1552
Dysmetabolic syndrome X	endocrine/metabolic	0.0179	-0.556	0.592	0.293	0.061	1.01806	0.573498	1.8076	21	6510	32	8321	0.951301	0.979159	not_significant	0.00777387	0.0216819	1.433	1.234	1.632	0.101	14.146	0	-0.0498	-0.055	-0.045	0.002	-20.549	0	0.4428	0.306	0.579	0.07	6.347	0	0.2902	0.178	0.402	0.057	5.066	0	1.1259	1.019	1.233	0.054	20.696	0	-0.1533
Dyspepsia and other specified disorders of function of stomach	digestive	0.3144	-0.016	0.645	0.169	1.866	1.36944	0.984127	1.90599	72	6459	84	8269	0.0621091	0.206839	not_significant	0.136542	1.20684	1.4322	1.234	1.631	0.101	14.138	0	-0.0499	-0.055	-0.045	0.002	-20.577	0	0.4447	0.308	0.581	0.07	6.373	0	0.2902	0.178	0.402	0.057	5.067	0	1.1275	1.021	1.234	0.054	20.724	0	-0.1546
Dysphagia	digestive	-0.032	-0.292	0.228	0.133	-0.241	0.968507	0.746769	1.25609	97	6434	173	8180	0.809366	0.919705	not_significant	-0.0138974	0.0918549	1.4327	1.234	1.631	0.101	14.141	0	-0.0498	-0.055	-0.045	0.002	-20.518	0	0.4422	0.305	0.579	0.07	6.336	0	0.29	0.178	0.402	0.057	5.064	0	1.1253	1.019	1.232	0.054	20.674	0	-0.1535
Dysthymic disorder	mental disorders	-0.2713	-0.551	0.009	0.143	-1.898	0.762388	0.576373	1.00904	83	6448	156	8197	0.0576926	0.199026	not_significant	-0.117824	1.23888	1.4387	1.24	1.637	0.101	14.197	0	-0.0497	-0.054	-0.045	0.002	-20.508	0	0.4352	0.298	0.572	0.07	6.228	0	0.2849	0.172	0.397	0.057	4.968	0	1.1188	1.012	1.226	0.055	20.524	0	-0.1609
Dysuria	genitourinary	0.3341	0.11	0.558	0.114	2.926	1.39668	1.11628	1.74717	170	6361	177	8176	0.00343305	0.0233512	mi_significant	0.145098	2.46432	1.4278	1.229	1.626	0.101	14.087	0	-0.05	-0.055	-0.045	0.002	-20.595	0	0.4488	0.312	0.586	0.07	6.429	0	0.2918	0.18	0.404	0.057	5.095	0	1.1305	1.024	1.237	0.054	20.768	0	-0.1511
E. coli	infectious diseases	2.2334	0.91	3.557	0.675	3.307	9.33154	2.48432	35.0579	15	6516	10	8343	0.00094467	0.00806044	mi_significant	0.969953	3.02472	1.4409	1.242	1.64	0.101	14.211	0	-0.0501	-0.055	-0.045	0.002	-20.629	0	0.443	0.306	0.58	0.07	6.348	0	0.2876	0.175	0.4	0.057	5.02	0	1.1261	1.019	1.233	0.054	20.695	0	-0.1533
Eating disorder	mental disorders	0.7801	-0.252	1.812	0.527	1.481	2.18169	0.777245	6.12268	10	6521	10	8343	0.138476	0.344417	not_significant	0.338793	0.858627	1.4322	1.234	1.631	0.101	14.137	0	-0.0498	-0.055	-0.045	0.002	-20.556	0	0.4434	0.307	0.58	0.07	6.355	0	0.29	0.178	0.402	0.057	5.063	0	1.1267	1.02	1.233	0.054	20.713	0	-0.1529
Ectropion or entropion	sense organs	0.1567	-1.153	1.467	0.668	0.234	1.16964	0.315688	4.33621	10	6521	10	8343	0.814628	0.922444	not_significant	0.0680539	0.0890407	1.4334	1.235	1.632	0.101	14.148	0	-0.0498	-0.055	-0.045	0.002	-20.553	0	0.4426	0.306	0.579	0.07	6.345	0	0.2902	0.178	0.402	0.057	5.067	0	1.1258	1.019	1.232	0.054	20.699	0	-0.1534
Edema	symptoms	0.2073	-0.066	0.481	0.139	1.487	1.23035	0.936131	1.61769	96	6435	143	8210	0.136926	0.342792	not_significant	0.0900292	0.863513	1.4406	1.242	1.639	0.101	14.204	0	-0.0501	-0.055	-0.045	0.002	-20.607	0	0.4428	0.306	0.58	0.07	6.347	0	0.2893	0.177	0.402	0.057	5.052	0	1.1281	1.021	1.235	0.054	20.73	0	-0.1529
Effects of heat, cold and air pressure		-0.1246	-0.735	0.486	0.311	-0.4	0.88285	0.479505	1.6258	18	6513	30	8323	0.688948	0.854906	not_significant	-0.0541131	0.161813	1.4331	1.235	1.632	0.101	14.146	0	-0.0498	-0.055	-0.045	0.002	-20.549	0	0.4423	0.306	0.579	0.07	6.34	0	0.2904	0.178	0.403	0.057	5.071	0	1.1257	1.019	1.232	0.054	20.697	0	-0.1533
Effects of other external causes		0.0113	-0.196	0.219	0.106	0.107	1.01136	0.822012	1.24483	166	6365	250	8103	0.914907	0.967848	not_significant	0.00490753	0.038623	1.433	1.234	1.632	0.101	14.146	0	-0.0498	-0.055	-0.045	0.002	-20.545	0	0.4427	0.306	0.579	0.07	6.347	0	0.2901	0.178	0.402	0.057	5.064	0	1.126	1.019	1.233	0.054	20.693	0	-0.1534
Effects radiation NOS	injuries & poisonings	1.2521	0.757	1.747	0.252	4.96	3.49768	2.13187	5.73736	63	6468	26	8327	7.06223e-07	1.51996e-05	mi_significant	0.54378	6.15106	1.4449	1.246	1.644	0.101	14.248	0	-0.0502	-0.055	-0.045	0.002	-20.688	0	0.4377	0.301	0.575	0.07	6.27	0	0.2836	0.171	0.396	0.057	4.948	0	1.123	1.016	1.23	0.054	20.632	0	-0.1548
Electrolyte imbalance	endocrine/metabolic	1.3034	0.154	2.453	0.587	2.222	3.68179	1.16649	11.6232	13	6518	10	8343	0.0262809	0.115189	not_significant	0.566059	1.58036	1.4334	1.235	1.632	0.101	14.146	0	-0.0499	-0.055	-0.045	0.002	-20.559	0	0.4438	0.307	0.58	0.07	6.361	0	0.2889	0.177	0.401	0.057	5.043	0	1.1258	1.019	1.232	0.054	20.694	0	-0.1536
Elevated blood pressure reading without diagnosis of hypertension	circulatory system	-0.4381	-0.573	-0.303	0.069	-6.352	0.645261	0.563831	0.738599	344	6187	802	7551	2.12224e-10	1.09295e-08	con_significant	-0.190264	9.67321	1.4529	1.254	1.652	0.101	14.333	0	-0.0492	-0.054	-0.044	0.002	-20.285	0	0.4132	0.276	0.55	0.07	5.907	0	0.2922	0.18	0.405	0.057	5.091	0	1.0929	0.986	1.2	0.055	19.993	0	-0.1641
Elevated C-reactive protein (CRP)	symptoms	-0.1151	-0.858	0.627	0.379	-0.304	0.891277	0.424009	1.87199	12	6519	21	8332	0.761224	0.895666	not_significant	-0.0499873	0.118488	1.4329	1.234	1.631	0.101	14.144	0	-0.0498	-0.055	-0.045	0.002	-20.55	0	0.4429	0.306	0.58	0.07	6.349	0	0.2905	0.178	0.403	0.057	5.072	0	1.1259	1.019	1.233	0.054	20.701	0	-0.1531
Elevated prostate specific antigen [PSA]	genitourinary	0.6786	0.294	1.063	0.196	3.46	1.97112	1.34178	2.89504	51	6480	70	8283	0.000539427	0.00515135	mi_significant	0.294712	3.26807	1.48	1.279	1.681	0.102	14.461	0	-0.0511	-0.056	-0.046	0.002	-20.799	0	0.4352	0.298	0.572	0.07	6.234	0	0.29	0.178	0.402	0.057	5.062	0	1.1265	1.02	1.233	0.054	20.7	0	-0.1554
Elevated sedimentation rate	symptoms	0.3711	-0.539	1.281	0.464	0.799	1.44933	0.583331	3.60024	10	6521	11	8342	0.424349	0.673061	not_significant	0.161167	0.372277	1.434	1.235	1.633	0.101	14.153	0	-0.0499	-0.055	-0.045	0.002	-20.562	0	0.4426	0.306	0.579	0.07	6.345	0	0.2904	0.178	0.403	0.057	5.07	0	1.126	1.019	1.233	0.054	20.702	0	-0.1536
Elevated white blood cell count	hematopoietic	0.4941	0.163	0.825	0.169	2.927	1.63902	1.17704	2.28188	80	6451	81	8272	0.00341765	0.0233512	mi_significant	0.214585	2.46627	1.4367	1.238	1.635	0.101	14.187	0	-0.0501	-0.055	-0.045	0.002	-20.644	0	0.4434	0.307	0.58	0.07	6.354	0	0.2877	0.175	0.4	0.057	5.023	0	1.128	1.021	1.235	0.054	20.733	0	-0.1544
Emphysema	respiratory	0.0497	-1.358	1.457	0.718	0.069	1.05096	0.257175	4.29306	10	6521	10	8343	0.944864	0.977399	not_significant	0.0215844	0.0246305	1.4332	1.235	1.632	0.101	14.142	0	-0.0498	-0.055	-0.045	0.002	-20.542	0	0.4427	0.306	0.579	0.07	6.346	0	0.2902	0.178	0.402	0.057	5.068	0	1.1258	1.019	1.232	0.054	20.698	0	-0.1534
Empyema and pneumothorax	respiratory	0.5831	-0.112	1.278	0.355	1.644	1.79158	0.894044	3.58945	20	6511	15	8338	0.100263	0.286448	not_significant	0.253237	0.998861	1.4308	1.232	1.629	0.101	14.121	0	-0.0498	-0.055	-0.045	0.002	-20.554	0	0.4449	0.308	0.582	0.07	6.376	0	0.2903	0.178	0.403	0.057	5.068	0	1.1275	1.021	1.234	0.054	20.724	0	-0.1514
Encephalitis	neurological	0.3974	-1.508	2.303	0.972	0.409	1.48795	0.221352	10.0041	10	6521	10	8343	0.682751	0.852993	not_significant	0.172589	0.165738	1.433	1.234	1.632	0.101	14.146	0	-0.0498	-0.055	-0.045	0.002	-20.552	0	0.4427	0.306	0.579	0.07	6.346	0	0.2902	0.178	0.402	0.057	5.068	0	1.1255	1.019	1.232	0.054	20.691	0	-0.1536
Encephalitis, non-infectious	neurological	-0.1789	-1.373	1.015	0.609	-0.294	0.83619	0.253346	2.75936	10	6521	10	8343	0.768963	0.900184	not_significant	-0.0776953	0.114094	1.4329	1.234	1.631	0.101	14.145	0	-0.0498	-0.055	-0.045	0.002	-20.55	0	0.443	0.306	0.58	0.07	6.35	0	0.2902	0.178	0.402	0.057	5.068	0	1.126	1.019	1.233	0.054	20.701	0	-0.1533
Encephalopathy, not elsewhere classified	neurological	1.3086	0.074	2.544	0.63	2.077	3.70099	1.07681	12.7305	12	6519	10	8343	0.0378364	0.151017	not_significant	0.568318	1.42209	1.4335	1.235	1.632	0.101	14.153	0	-0.0499	-0.055	-0.045	0.002	-20.567	0	0.4407	0.304	0.578	0.07	6.316	0	0.2881	0.176	0.4	0.057	5.029	0	1.1249	1.018	1.231	0.054	20.68	0	-0.1532
Encounter for long-term (current) use of antibiotics		1.0071	0.174	1.84	0.425	2.37	2.73765	1.19006	6.29654	17	6514	10	8343	0.017774	0.0834857	not_significant	0.437378	1.75021	1.4329	1.234	1.631	0.101	14.14	0	-0.0499	-0.055	-0.045	0.002	-20.557	0	0.4439	0.307	0.581	0.07	6.362	0	0.2863	0.174	0.399	0.057	4.995	0	1.1263	1.02	1.233	0.054	20.704	0	-0.1538
Encounter for long-term (current) use of anticoagulants		0.6805	0.112	1.249	0.29	2.348	1.97486	1.11851	3.48685	30	6501	25	8328	0.0188957	0.0878955	not_significant	0.295537	1.72364	1.4425	1.244	1.641	0.101	14.224	0	-0.0501	-0.055	-0.045	0.002	-20.639	0	0.4433	0.307	0.58	0.07	6.353	0	0.2884	0.176	0.401	0.057	5.034	0	1.1247	1.018	1.231	0.054	20.675	0	-0.1532
Encounter for long-term (current) use of antiplatelets/antithrombotics		0.5754	-1.86	3.011	1.243	0.463	1.77784	0.155673	20.3077	10	6521	10	8343	0.64331	0.827522	not_significant	0.249893	0.19158	1.4336	1.235	1.632	0.101	14.15	0	-0.0499	-0.055	-0.045	0.002	-20.556	0	0.4432	0.306	0.58	0.07	6.352	0	0.2906	0.178	0.403	0.057	5.074	0	1.1263	1.02	1.233	0.054	20.704	0	-0.153
Encounter for long-term (current) use of aspirin		0.8841	-0.068	1.837	0.486	1.819	2.4208	0.93426	6.27768	12	6519	10	8343	0.0688632	0.223148	not_significant	0.38396	1.16201	1.4425	1.244	1.641	0.101	14.217	0	-0.0501	-0.055	-0.045	0.002	-20.623	0	0.4439	0.307	0.581	0.07	6.363	0	0.2917	0.179	0.404	0.057	5.092	0	1.125	1.018	1.232	0.054	20.683	0	-0.1515
End stage renal disease	genitourinary	2.2497	1.549	2.951	0.358	6.291	9.48489	4.70676	19.1251	58	6473	10	8343	3.161e-10	1.57178e-08	mi_significant	0.977032	9.50018	1.4467	1.248	1.646	0.102	14.24	0	-0.0504	-0.055	-0.046	0.002	-20.723	0	0.4386	0.301	0.576	0.07	6.268	0	0.2921	0.18	0.405	0.057	5.092	0	1.1293	1.022	1.236	0.054	20.724	0	-0.1503
Endocarditis	circulatory system	1.0641	-0.142	2.27	0.615	1.73	2.89823	0.867621	9.6794	10	6521	10	8343	0.0836488	0.253407	not_significant	0.462133	1.07754	1.4345	1.236	1.633	0.101	14.16	0	-0.0499	-0.055	-0.045	0.002	-20.575	0	0.442	0.305	0.579	0.07	6.336	0	0.2903	0.178	0.403	0.057	5.069	0	1.1263	1.02	1.233	0.054	20.704	0	-0.1535
Enthesopathy	musculoskeletal	-0.2892	-0.471	-0.107	0.093	-3.115	0.748862	0.624378	0.898526	193	6338	396	7957	0.00184232	0.0139091	con_significant	-0.125598	2.73463	1.4321	1.234	1.631	0.101	14.138	0	-0.0494	-0.054	-0.045	0.002	-20.372	0	0.4348	0.298	0.572	0.07	6.228	0	0.288	0.176	0.4	0.057	5.027	0	1.1182	1.012	1.225	0.054	20.537	0	-0.1561
Eosinophilia	hematopoietic	1.4489	0.356	2.541	0.557	2.599	4.25843	1.42761	12.6924	11	6520	10	8343	0.00934159	0.0500765	not_significant	0.629249	2.02958	1.4384	1.24	1.637	0.101	14.19	0	-0.05	-0.055	-0.045	0.002	-20.594	0	0.4421	0.305	0.579	0.07	6.336	0	0.2892	0.177	0.401	0.057	5.05	0	1.1251	1.018	1.232	0.054	20.684	0	-0.1564
Eosinophilic esophagitis	digestive	-0.4685	-1.1	0.163	0.322	-1.454	0.62594	0.332871	1.17704	14	6517	36	8317	0.146019	0.356276	not_significant	-0.203467	0.835592	1.4341	1.236	1.633	0.101	14.156	0	-0.0498	-0.055	-0.045	0.002	-20.536	0	0.4404	0.304	0.577	0.07	6.312	0	0.2888	0.177	0.401	0.057	5.043	0	1.1239	1.017	1.23	0.054	20.656	0	-0.1543
Epilepsy	neurological	0.06	-0.738	0.858	0.407	0.147	1.06184	0.478069	2.35844	12	6519	14	8339	0.882877	0.95131	not_significant	0.0260577	0.0540998	1.4327	1.234	1.631	0.101	14.141	0	-0.0498	-0.055	-0.045	0.002	-20.549	0	0.4426	0.306	0.579	0.07	6.344	0	0.2902	0.178	0.402	0.057	5.067	0	1.1258	1.019	1.232	0.054	20.699	0	-0.1535
Epilepsy, recurrent seizures, convulsions	neurological	0.2228	-0.249	0.694	0.241	0.926	1.24957	0.77958	2.00171	41	6490	35	8318	0.354357	0.606149	not_significant	0.0967608	0.450559	1.43	1.231	1.629	0.101	14.109	0	-0.0498	-0.055	-0.045	0.002	-20.526	0	0.4416	0.305	0.578	0.07	6.329	0	0.2903	0.178	0.403	0.057	5.069	0	1.1255	1.019	1.232	0.054	20.692	0	-0.1535
Epiphora	sense organs	0.0491	-0.863	0.961	0.465	0.106	1.05033	0.421894	2.61431	10	6521	14	8339	0.915863	0.967848	not_significant	0.0213239	0.0381693	1.4332	1.235	1.632	0.101	14.145	0	-0.0498	-0.055	-0.045	0.002	-20.547	0	0.4427	0.306	0.579	0.07	6.347	0	0.2902	0.178	0.402	0.057	5.067	0	1.1258	1.019	1.232	0.054	20.699	0	-0.1534
Epistaxis or throat hemorrhage	respiratory	0.1838	-0.242	0.609	0.217	0.847	1.20178	0.785056	1.83859	46	6485	50	8303	0.397097	0.650017	not_significant	0.0798233	0.401103	1.4311	1.233	1.63	0.101	14.125	0	-0.0498	-0.055	-0.045	0.002	-20.549	0	0.4433	0.307	0.58	0.07	6.354	0	0.2905	0.178	0.403	0.057	5.072	0	1.1264	1.02	1.233	0.054	20.707	0	-0.153
Erectile dysfunction [ED]	genitourinary	0.824	0.702	0.946	0.062	13.25	2.2796	2.01778	2.57539	742	5789	616	7737	4.50676e-40	1.29975e-37	mi_significant	0.357859	39.3461	1.5987	1.397	1.8	0.103	15.527	0	-0.0562	-0.061	-0.051	0.002	-22.476	0	0.4334	0.296	0.571	0.07	6.163	0	0.3046	0.192	0.417	0.058	5.289	0	1.1528	1.045	1.26	0.055	21.042	0	-0.1468
Erythema nodosum	dermatologic	0.4656	-0.993	1.924	0.744	0.626	1.59297	0.370464	6.8483	10	6521	10	8343	0.53151	0.756602	not_significant	0.202208	0.274488	1.4329	1.234	1.631	0.101	14.146	0	-0.0498	-0.055	-0.045	0.002	-20.553	0	0.4427	0.306	0.579	0.07	6.346	0	0.2898	0.178	0.402	0.057	5.061	0	1.1257	1.019	1.232	0.054	20.697	0	-0.1539
Erythematosquamous dermatosis	dermatologic	2.2902	-0.339	4.92	1.342	1.707	9.87691	0.712482	137.003	10	6521	10	8343	0.0878209	0.264379	not_significant	0.994621	1.0564	1.4368	1.238	1.635	0.101	14.182	0	-0.0499	-0.055	-0.045	0.002	-20.591	0	0.4428	0.306	0.58	0.07	6.348	0	0.2903	0.178	0.403	0.057	5.069	0	1.126	1.019	1.233	0.054	20.702	0	-0.1545
Esophageal atresia/tracheoesophageal fistula	congenital anomalies	-1.7315	-3.812	0.35	1.062	-1.631	0.177019	0.0221039	1.41907	10	6521	11	8342	0.102936	0.289909	not_significant	-0.751981	0.987433	1.4301	1.232	1.629	0.101	14.113	0	-0.0497	-0.054	-0.045	0.002	-20.505	0	0.4422	0.305	0.579	0.07	6.338	0	0.2904	0.178	0.403	0.057	5.07	0	1.1253	1.019	1.232	0.054	20.688	0	-0.1533
Esophageal bleeding (varices/hemorrhage)	digestive	0.2173	-0.469	0.904	0.35	0.62	1.24272	0.625628	2.46946	15	6516	22	8331	0.535193	0.758135	not_significant	0.0943722	0.271489	1.4337	1.235	1.632	0.101	14.152	0	-0.0499	-0.055	-0.045	0.002	-20.561	0	0.4429	0.306	0.58	0.07	6.349	0	0.2906	0.178	0.403	0.057	5.075	0	1.1267	1.02	1.233	0.054	20.707	0	-0.1528
Esophagitis, GERD and related diseases	digestive	0.1464	-0.369	0.662	0.263	0.557	1.15766	0.691425	1.93867	25	6506	38	8315	0.577798	0.787509	not_significant	0.0635807	0.238224	1.4329	1.234	1.631	0.101	14.144	0	-0.0499	-0.055	-0.045	0.002	-20.558	0	0.4437	0.307	0.58	0.07	6.358	0	0.2911	0.179	0.403	0.057	5.081	0	1.1273	1.021	1.234	0.054	20.701	0	-0.1523
Essential hypertension	circulatory system	0.1697	0.056	0.283	0.058	2.93	1.18495	1.0576	1.32711	634	5897	944	7409	0.00338536	0.0232937	mi_significant	0.0736998	2.4704	1.4604	1.261	1.66	0.102	14.351	0	-0.0511	-0.056	-0.046	0.002	-20.729	0	0.4475	0.311	0.584	0.07	6.412	0	0.294	0.182	0.406	0.057	5.131	0	1.1394	1.032	1.246	0.055	20.859	0	-0.1479
Essential tremor	neurological	-0.5907	-1.378	0.197	0.402	-1.47	0.553939	0.252082	1.21774	10	6521	24	8329	0.141526	0.348856	not_significant	-0.256538	0.849163	1.4347	1.236	1.633	0.101	14.157	0	-0.0498	-0.055	-0.045	0.002	-20.543	0	0.4416	0.305	0.578	0.07	6.329	0	0.2889	0.177	0.401	0.057	5.044	0	1.1251	1.018	1.232	0.054	20.684	0	-0.1543
Eustachian tube disorders	sense organs	-0.5519	-0.824	-0.28	0.139	-3.979	0.575855	0.438673	0.755784	76	6455	207	8146	6.91744e-05	0.000824376	con_significant	-0.239687	4.16005	1.4463	1.248	1.645	0.101	14.267	0	-0.0498	-0.055	-0.045	0.002	-20.518	0	0.4311	0.294	0.568	0.07	6.173	0	0.281	0.169	0.393	0.057	4.9	0	1.1135	1.007	1.22	0.054	20.434	0	-0.1569
Exophthalmos	endocrine/metabolic	1.0412	-0.702	2.785	0.89	1.17	2.83261	0.495593	16.1998	10	6521	10	8343	0.241865	0.481062	not_significant	0.452187	0.616426	1.434	1.235	1.633	0.101	14.153	0	-0.0499	-0.055	-0.045	0.002	-20.569	0	0.444	0.307	0.581	0.07	6.363	0	0.2914	0.179	0.404	0.057	5.088	0	1.1262	1.02	1.233	0.054	20.704	0	-0.1521
Exostosis of jaw		1.7814	-0.516	4.078	1.172	1.52	5.93816	0.596903	59.0273	10	6521	10	8343	0.128513	0.330182	not_significant	0.773652	0.891051	1.4319	1.233	1.63	0.101	14.133	0	-0.0499	-0.055	-0.045	0.002	-20.559	0	0.4447	0.308	0.581	0.07	6.373	0	0.2922	0.18	0.404	0.057	5.101	0	1.1278	1.021	1.234	0.054	20.728	0	-0.1518
Extrapyramidal disease and abnormal movement disorders	neurological	0.2786	-0.643	1.201	0.47	0.592	1.32128	0.525713	3.32344	10	6521	11	8342	0.553698	0.770688	not_significant	0.120994	0.256727	1.4339	1.235	1.632	0.101	14.153	0	-0.0499	-0.055	-0.045	0.002	-20.559	0	0.4422	0.305	0.579	0.07	6.339	0	0.2897	0.177	0.402	0.057	5.059	0	1.1258	1.019	1.232	0.054	20.698	0	-0.1536
Eye infection, viral	sense organs	-0.9102	-1.612	-0.208	0.358	-2.541	0.402444	0.199488	0.812207	10	6521	43	8310	0.0110479	0.0575823	not_significant	-0.395295	1.95672	1.4287	1.23	1.627	0.101	14.102	0	-0.0496	-0.054	-0.045	0.002	-20.466	0	0.4411	0.304	0.578	0.07	6.322	0	0.29	0.178	0.402	0.057	5.063	0	1.124	1.017	1.231	0.054	20.659	0	-0.1537
Facial nerve disorders [CN7]	neurological	-0.1722	-0.79	0.445	0.315	-0.547	0.841811	0.453845	1.56049	18	6513	31	8322	0.584686	0.792403	not_significant	-0.0747855	0.233077	1.4327	1.234	1.631	0.101	14.143	0	-0.0498	-0.055	-0.045	0.002	-20.541	0	0.4428	0.306	0.579	0.07	6.347	0	0.29	0.178	0.402	0.057	5.064	0	1.1257	1.019	1.232	0.054	20.696	0	-0.1535
Facial weakness	symptoms	1.0483	-0.128	2.225	0.6	1.747	2.8528	0.879853	9.25348	10	6521	10	8343	0.0806983	0.249152	not_significant	0.455271	1.09314	1.4373	1.239	1.636	0.101	14.181	0	-0.05	-0.055	-0.045	0.002	-20.592	0	0.4421	0.305	0.579	0.07	6.336	0	0.2896	0.177	0.402	0.057	5.056	0	1.1261	1.02	1.233	0.054	20.701	0	-0.1528
Family history		-0.3333	-0.455	-0.212	0.062	-5.375	0.716555	0.634448	0.808965	474	6057	934	7419	7.67307e-08	2.16952e-06	con_significant	-0.14475	7.11503	1.4107	1.212	1.609	0.101	13.916	0	-0.0489	-0.054	-0.044	0.002	-20.128	0	0.4453	0.308	0.582	0.07	6.38	0	0.3188	0.206	0.432	0.058	5.539	0	1.1363	1.03	1.243	0.054	20.868	0	-0.1301
Fasciitis	musculoskeletal	-0.2424	-0.478	-0.007	0.12	-2.015	0.784742	0.620022	0.993024	111	6420	234	8119	0.0439288	0.164533	not_significant	-0.105273	1.35725	1.4335	1.235	1.632	0.101	14.153	0	-0.0496	-0.054	-0.045	0.002	-20.458	0	0.4368	0.3	0.574	0.07	6.256	0	0.2856	0.173	0.398	0.057	4.983	0	1.1201	1.013	1.227	0.054	20.566	0	-0.1549
Femoral hernia	digestive	0.1714	-1.43	1.773	0.817	0.21	1.18697	0.239309	5.88849	10	6521	10	8343	0.833857	0.927863	not_significant	0.0744381	0.0789084	1.4332	1.235	1.632	0.101	14.147	0	-0.0498	-0.055	-0.045	0.002	-20.553	0	0.4428	0.306	0.58	0.07	6.347	0	0.2902	0.178	0.402	0.057	5.068	0	1.1258	1.019	1.232	0.054	20.699	0	-0.1534
Fetal distress and abnormal forces of labor	pregnancy complications	1.0869	-0.616	2.79	0.869	1.251	2.96507	0.540101	16.281	10	6521	10	8343	0.211024	0.446183	not_significant	0.472035	0.675668	1.431	1.232	1.63	0.101	14.124	0	-0.0498	-0.055	-0.045	0.002	-20.544	0	0.4432	0.306	0.58	0.07	6.352	0	0.2915	0.179	0.404	0.057	5.089	0	1.1271	1.02	1.234	0.054	20.717	0	-0.1526
Fever of unknown origin	symptoms	-0.0625	-0.258	0.133	0.1	-0.628	0.939413	0.772595	1.14225	196	6335	288	8065	0.530322	0.755656	not_significant	-0.0271434	0.275461	1.4353	1.237	1.634	0.101	14.159	0	-0.0498	-0.055	-0.045	0.002	-20.552	0	0.4416	0.305	0.578	0.07	6.327	0	0.2898	0.178	0.402	0.057	5.061	0	1.1251	1.018	1.232	0.054	20.681	0	-0.1532
First degree AV block	circulatory system	-0.155	-1.117	0.807	0.491	-0.316	0.856415	0.32726	2.24117	10	6521	14	8339	0.752097	0.892722	not_significant	-0.0673156	0.123726	1.4326	1.234	1.631	0.101	14.141	0	-0.0498	-0.055	-0.045	0.002	-20.54	0	0.4427	0.306	0.579	0.07	6.346	0	0.2902	0.178	0.402	0.057	5.068	0	1.1257	1.019	1.232	0.054	20.695	0	-0.1536
Flat foot	musculoskeletal	0.0868	-0.327	0.5	0.211	0.411	1.09068	0.721084	1.64872	42	6489	59	8294	0.681006	0.852993	not_significant	0.0376968	0.166849	1.4327	1.234	1.631	0.101	14.142	0	-0.0498	-0.055	-0.045	0.002	-20.556	0	0.4431	0.306	0.58	0.07	6.351	0	0.2901	0.178	0.402	0.057	5.065	0	1.1263	1.02	1.233	0.054	20.703	0	-0.1533
Flatulence	digestive	0.442	0.184	0.7	0.132	3.354	1.55582	1.20202	2.01375	124	6407	133	8220	0.000797877	0.00705852	mi_significant	0.191958	3.09806	1.4338	1.235	1.632	0.101	14.149	0	-0.0501	-0.055	-0.045	0.002	-20.641	0	0.4475	0.311	0.584	0.07	6.412	0	0.2931	0.181	0.405	0.057	5.115	0	1.1312	1.025	1.238	0.054	20.779	0	-0.1544
Fluid overload	endocrine/metabolic	2.0642	1.214	2.915	0.434	4.757	7.87899	3.36693	18.4488	33	6498	10	8343	1.96641e-06	3.82904e-05	mi_significant	0.896471	5.70633	1.4375	1.239	1.636	0.101	14.171	0	-0.0502	-0.055	-0.045	0.002	-20.651	0	0.4444	0.307	0.581	0.07	6.362	0	0.291	0.179	0.403	0.057	5.075	0	1.1319	1.025	1.239	0.054	20.782	0	-0.1482
Folate-deficiency anemia	hematopoietic	-0.3849	-2.139	1.369	0.895	-0.43	0.680519	0.117773	3.93142	10	6521	10	8343	0.66715	0.847323	not_significant	-0.16716	0.175777	1.4335	1.235	1.632	0.101	14.15	0	-0.0498	-0.055	-0.045	0.002	-20.554	0	0.4424	0.306	0.579	0.07	6.342	0	0.2899	0.178	0.402	0.057	5.062	0	1.1257	1.019	1.232	0.054	20.696	0	-0.1534
Foreign body injury		-0.2676	-0.718	0.183	0.23	-1.165	0.765214	0.487727	1.20081	31	6500	62	8291	0.244062	0.484095	not_significant	-0.116217	0.6125	1.4351	1.237	1.634	0.101	14.164	0	-0.0498	-0.055	-0.045	0.002	-20.541	0	0.4409	0.304	0.578	0.07	6.319	0	0.2881	0.176	0.4	0.057	5.029	0	1.1234	1.017	1.23	0.054	20.64	0	-0.1551
Fracture of ankle and foot	injuries & poisonings	-0.7253	-1.092	-0.358	0.187	-3.873	0.484179	0.335545	0.699073	41	6490	124	8229	0.000107506	0.00118338	con_significant	-0.314994	3.96857	1.4343	1.236	1.633	0.101	14.156	0	-0.0496	-0.054	-0.045	0.002	-20.453	0	0.4356	0.299	0.572	0.07	6.24	0	0.287	0.175	0.399	0.057	5.007	0	1.1217	1.015	1.228	0.054	20.607	0	-0.1562
Fracture of clavicle or scapula	injuries & poisonings	-0.1929	-0.792	0.407	0.306	-0.631	0.824564	0.452938	1.5023	19	6512	30	8323	0.528275	0.753485	not_significant	-0.0837754	0.27714	1.434	1.235	1.633	0.101	14.154	0	-0.0498	-0.055	-0.045	0.002	-20.553	0	0.4421	0.305	0.579	0.07	6.337	0	0.2898	0.178	0.402	0.057	5.06	0	1.1256	1.019	1.232	0.054	20.694	0	-0.1536
Fracture of foot	injuries & poisonings	-0.3071	-1.093	0.479	0.401	-0.766	0.735577	0.335209	1.61446	11	6520	18	8335	0.443633	0.687869	not_significant	-0.133372	0.352976	1.4333	1.235	1.632	0.101	14.149	0	-0.0498	-0.055	-0.045	0.002	-20.549	0	0.4424	0.306	0.579	0.07	6.342	0	0.2901	0.178	0.402	0.057	5.066	0	1.1258	1.019	1.232	0.054	20.698	0	-0.1538
Fracture of hand or wrist	injuries & poisonings	-0.3669	-0.689	-0.045	0.164	-2.233	0.692879	0.502078	0.955997	59	6472	124	8229	0.02556	0.112714	not_significant	-0.159343	1.59244	1.4392	1.241	1.638	0.101	14.2	0	-0.0498	-0.055	-0.045	0.002	-20.547	0	0.4385	0.302	0.575	0.07	6.284	0	0.2885	0.176	0.401	0.057	5.036	0	1.1217	1.015	1.228	0.054	20.609	0	-0.1551
Fracture of humerus	injuries & poisonings	0.0333	-0.618	0.684	0.332	0.1	1.03386	0.539021	1.98179	17	6514	23	8330	0.920052	0.968005	not_significant	0.014462	0.0361877	1.4329	1.234	1.631	0.101	14.144	0	-0.0498	-0.055	-0.045	0.002	-20.553	0	0.4428	0.306	0.579	0.07	6.347	0	0.2902	0.178	0.402	0.057	5.068	0	1.1259	1.019	1.232	0.054	20.7	0	-0.1534
Fracture of lower limb	injuries & poisonings	-0.0797	-0.599	0.44	0.265	-0.301	0.923393	0.549361	1.55271	25	6506	41	8312	0.76365	0.895999	not_significant	-0.0346133	0.117106	1.433	1.234	1.632	0.101	14.146	0	-0.0498	-0.055	-0.045	0.002	-20.545	0	0.4425	0.306	0.579	0.07	6.343	0	0.2901	0.178	0.402	0.057	5.066	0	1.1256	1.019	1.232	0.054	20.692	0	-0.1535
Fracture of neck of femur	injuries & poisonings	-0.0729	-1.342	1.196	0.648	-0.113	0.929694	0.261323	3.30686	10	6521	10	8343	0.910378	0.96456	not_significant	-0.0316601	0.040778	1.433	1.234	1.632	0.101	14.146	0	-0.0498	-0.055	-0.045	0.002	-20.551	0	0.4426	0.306	0.579	0.07	6.345	0	0.2901	0.178	0.402	0.057	5.065	0	1.1257	1.019	1.232	0.054	20.694	0	-0.1535
Fracture of patella	injuries & poisonings	0.5374	-0.392	1.467	0.474	1.134	1.71155	0.675704	4.33621	10	6521	10	8343	0.256925	0.499144	not_significant	0.23339	0.590193	1.4319	1.233	1.63	0.101	14.135	0	-0.0498	-0.055	-0.045	0.002	-20.554	0	0.4436	0.307	0.58	0.07	6.358	0	0.2902	0.178	0.402	0.057	5.067	0	1.127	1.02	1.234	0.054	20.715	0	-0.1527
Fracture of pelvis	injuries & poisonings	0.278	-0.891	1.447	0.596	0.466	1.32049	0.410245	4.25034	10	6521	10	8343	0.641091	0.825571	not_significant	0.120734	0.19308	1.433	1.234	1.632	0.101	14.148	0	-0.0498	-0.055	-0.045	0.002	-20.559	0	0.4432	0.306	0.58	0.07	6.352	0	0.2903	0.178	0.403	0.057	5.07	0	1.1263	1.02	1.233	0.054	20.704	0	-0.1532
Fracture of radius and ulna	injuries & poisonings	-0.4569	-0.952	0.038	0.253	-1.808	0.633244	0.385968	1.03873	24	6507	57	8296	0.0706133	0.226276	not_significant	-0.198429	1.15111	1.4323	1.234	1.631	0.101	14.138	0	-0.0497	-0.055	-0.045	0.002	-20.514	0	0.442	0.305	0.579	0.07	6.335	0	0.2909	0.179	0.403	0.057	5.078	0	1.1247	1.018	1.231	0.054	20.675	0	-0.1539
Fracture of ribs	injuries & poisonings	0.0095	-0.635	0.654	0.329	0.029	1.00955	0.529935	1.92322	16	6515	29	8324	0.976974	0.987936	not_significant	0.0041258	0.0101171	1.4331	1.234	1.632	0.101	14.142	0	-0.0498	-0.055	-0.045	0.002	-20.54	0	0.4427	0.306	0.579	0.07	6.346	0	0.2902	0.178	0.402	0.057	5.068	0	1.1258	1.019	1.232	0.054	20.699	0	-0.1534
Fracture of tibia and fibula	injuries & poisonings	-0.3089	-0.877	0.259	0.29	-1.065	0.734254	0.416029	1.29563	20	6511	38	8315	0.286683	0.525593	not_significant	-0.134154	0.542598	1.4339	1.235	1.632	0.101	14.154	0	-0.0498	-0.055	-0.045	0.002	-20.543	0	0.4412	0.304	0.578	0.07	6.324	0	0.2898	0.178	0.402	0.057	5.06	0	1.1251	1.018	1.232	0.054	20.684	0	-0.154
Fracture of unspecified bones	injuries & poisonings	0.0902	-0.391	0.571	0.246	0.367	1.09439	0.67638	1.77004	34	6497	40	8313	0.713406	0.871806	not_significant	0.0391734	0.146663	1.4323	1.234	1.631	0.101	14.136	0	-0.0498	-0.055	-0.045	0.002	-20.553	0	0.4432	0.306	0.58	0.07	6.352	0	0.2905	0.178	0.403	0.057	5.072	0	1.1262	1.02	1.233	0.054	20.702	0	-0.1529
Fracture of unspecified part of femur	injuries & poisonings	0.415	-0.663	1.493	0.55	0.754	1.51437	0.515303	4.45043	10	6521	10	8343	0.450655	0.689289	not_significant	0.180232	0.346156	1.4314	1.233	1.63	0.101	14.128	0	-0.0498	-0.055	-0.045	0.002	-20.539	0	0.4429	0.306	0.58	0.07	6.348	0	0.2895	0.177	0.402	0.057	5.055	0	1.1262	1.02	1.233	0.054	20.705	0	-0.1531
Fracture of upper limb	injuries & poisonings	0.0073	-0.703	0.718	0.362	0.02	1.00733	0.495098	2.05033	14	6517	21	8332	0.983869	0.991432	not_significant	0.00317035	0.00706284	1.433	1.234	1.632	0.101	14.146	0	-0.0498	-0.055	-0.045	0.002	-20.551	0	0.4427	0.306	0.579	0.07	6.346	0	0.2902	0.178	0.402	0.057	5.068	0	1.1258	1.019	1.232	0.054	20.699	0	-0.1534
Fracture of vertebral column without mention of spinal cord injury	injuries & poisonings	0.5646	0.032	1.097	0.272	2.079	1.75874	1.03252	2.99517	31	6500	29	8324	0.0376188	0.150842	not_significant	0.245203	1.42459	1.4337	1.235	1.632	0.101	14.153	0	-0.0499	-0.055	-0.045	0.002	-20.587	0	0.4435	0.307	0.58	0.07	6.356	0	0.2894	0.177	0.402	0.057	5.052	0	1.1278	1.021	1.234	0.054	20.729	0	-0.1527
Frequency of urination and polyuria	genitourinary	0.3446	0.137	0.552	0.106	3.257	1.41143	1.14683	1.73672	181	6350	237	8116	0.00112794	0.00920287	mi_significant	0.149658	2.94771	1.4514	1.252	1.65	0.101	14.304	0	-0.0506	-0.055	-0.046	0.002	-20.76	0	0.4443	0.308	0.581	0.07	6.368	0	0.293	0.181	0.405	0.057	5.113	0	1.1308	1.024	1.238	0.054	20.774	0	-0.1558
Fuchs' dystrophy	sense organs	0.4129	-1.998	2.824	1.23	0.336	1.51119	0.135606	16.8441	10	6521	10	8343	0.737095	0.885742	not_significant	0.17932	0.132477	1.4336	1.235	1.632	0.101	14.149	0	-0.0499	-0.055	-0.045	0.002	-20.554	0	0.4426	0.306	0.579	0.07	6.345	0	0.2904	0.178	0.403	0.057	5.07	0	1.126	1.019	1.233	0.054	20.701	0	-0.1533
Functional digestive disorders	digestive	1.0879	0.387	1.789	0.358	3.041	2.96803	1.47256	5.98347	27	6504	13	8340	0.00235639	0.0176058	mi_significant	0.472469	2.62775	1.4295	1.231	1.628	0.101	14.104	0	-0.0499	-0.055	-0.045	0.002	-20.563	0	0.4472	0.31	0.584	0.07	6.408	0	0.293	0.181	0.405	0.057	5.113	0	1.129	1.022	1.236	0.054	20.741	0	-0.1504
Functional disorders of bladder	genitourinary	1.2311	0.811	1.651	0.214	5.741	3.42499	2.25016	5.21219	77	6454	36	8317	9.43432e-09	3.31812e-07	mi_significant	0.53466	8.02529	1.4381	1.239	1.637	0.101	14.177	0	-0.0503	-0.055	-0.046	0.002	-20.72	0	0.4442	0.307	0.581	0.07	6.358	0	0.2977	0.185	0.41	0.057	5.19	0	1.134	1.027	1.241	0.054	20.813	0	-0.1462
Ganglion and cyst of synovium, tendon, and bursa	musculoskeletal	-0.4818	-0.84	-0.123	0.183	-2.633	0.617671	0.431711	0.884264	45	6486	117	8236	0.00845512	0.0461829	con_significant	-0.209243	2.07288	1.4317	1.233	1.63	0.101	14.129	0	-0.0496	-0.054	-0.045	0.002	-20.447	0	0.4372	0.3	0.574	0.07	6.265	0	0.2878	0.175	0.4	0.057	5.023	0	1.1213	1.015	1.228	0.054	20.603	0	-0.156
Gastric ulcer	digestive	-0.4592	-1.364	0.446	0.462	-0.995	0.631789	0.255636	1.56205	10	6521	19	8334	0.319875	0.565963	not_significant	-0.199428	0.49502	1.4319	1.233	1.631	0.101	14.134	0	-0.0498	-0.055	-0.045	0.002	-20.534	0	0.4433	0.307	0.58	0.07	6.354	0	0.2903	0.178	0.402	0.057	5.068	0	1.1258	1.019	1.232	0.054	20.698	0	-0.1527
Gastritis and duodenitis, NOS	digestive	-0.2274	-0.57	0.115	0.175	-1.302	0.796602	0.565525	1.12187	55	6476	103	8250	0.192747	0.426674	not_significant	-0.0987586	0.715012	1.4348	1.236	1.633	0.101	14.163	0	-0.0498	-0.055	-0.045	0.002	-20.525	0	0.4391	0.302	0.576	0.07	6.29	0	0.2883	0.176	0.401	0.057	5.033	0	1.123	1.016	1.23	0.054	20.631	0	-0.1556
Gastroesophageal laceration-hemorrhage syndrome	digestive	1.4208	-0.004	2.846	0.727	1.954	4.14043	0.996008	17.2188	10	6521	10	8343	0.0507183	0.185154	not_significant	0.617046	1.29484	1.4342	1.236	1.633	0.101	14.154	0	-0.0499	-0.055	-0.045	0.002	-20.569	0	0.4429	0.306	0.58	0.07	6.348	0	0.2899	0.178	0.402	0.057	5.061	0	1.1269	1.02	1.234	0.054	20.715	0	-0.1531
Gastrointestinal complications	digestive	0.0428	-0.681	0.766	0.369	0.116	1.04373	0.506111	2.15114	14	6517	20	8333	0.907624	0.964476	not_significant	0.0185878	0.0420939	1.433	1.234	1.632	0.101	14.146	0	-0.0498	-0.055	-0.045	0.002	-20.551	0	0.4428	0.306	0.58	0.07	6.347	0	0.2903	0.178	0.403	0.057	5.069	0	1.1259	1.019	1.233	0.054	20.698	0	-0.1533
Gastrointestinal malfunction arising from mental factors		-0.3343	-1	0.332	0.34	-0.984	0.715839	0.367879	1.39375	14	6517	29	8324	0.325272	0.573401	not_significant	-0.145185	0.487754	1.4308	1.232	1.629	0.101	14.122	0	-0.0498	-0.055	-0.045	0.002	-20.516	0	0.4425	0.306	0.579	0.07	6.343	0	0.2908	0.179	0.403	0.057	5.077	0	1.1263	1.02	1.233	0.054	20.706	0	-0.1531
Gastrojejunal ulcer	digestive	0.8879	-2.02	3.795	1.483	0.599	2.43002	0.132655	44.4782	10	6521	10	8343	0.549471	0.766756	not_significant	0.38561	0.260055	1.4337	1.235	1.632	0.101	14.151	0	-0.0499	-0.055	-0.045	0.002	-20.559	0	0.4423	0.306	0.579	0.07	6.34	0	0.2905	0.178	0.403	0.057	5.072	0	1.1262	1.02	1.233	0.054	20.704	0	-0.1531
Gastroparesis	digestive	1.5338	-0.052	3.119	0.809	1.896	4.63576	0.949329	22.6237	10	6521	10	8343	0.0579608	0.199474	not_significant	0.666121	1.23687	1.4343	1.236	1.633	0.101	14.154	0	-0.0499	-0.055	-0.045	0.002	-20.558	0	0.4405	0.304	0.577	0.07	6.313	0	0.2881	0.176	0.4	0.057	5.029	0	1.1249	1.018	1.231	0.054	20.68	0	-0.1537
Generalized anxiety disorder	mental disorders	-0.1316	-0.362	0.099	0.118	-1.119	0.876692	0.696282	1.10407	126	6405	210	8143	0.262973	0.505609	not_significant	-0.0571532	0.580089	1.437	1.238	1.636	0.101	14.177	0	-0.0498	-0.055	-0.045	0.002	-20.558	0	0.4415	0.305	0.578	0.07	6.329	0	0.2905	0.178	0.403	0.057	5.072	0	1.1234	1.017	1.23	0.054	20.638	0	-0.1536
Generalized convulsive epilepsy	neurological	0.0901	-0.723	0.903	0.415	0.217	1.09428	0.485294	2.46699	12	6519	13	8340	0.828067	0.927796	not_significant	0.0391299	0.0819343	1.4324	1.234	1.631	0.101	14.136	0	-0.0498	-0.055	-0.045	0.002	-20.545	0	0.4425	0.306	0.579	0.07	6.342	0	0.2902	0.178	0.402	0.057	5.067	0	1.1259	1.019	1.233	0.054	20.7	0	-0.1533
Genetic Test		-0.0617	-0.515	0.391	0.231	-0.267	0.940165	0.597501	1.47846	38	6493	48	8305	0.789415	0.911398	not_significant	-0.026796	0.102695	1.4332	1.235	1.632	0.101	14.148	0	-0.0498	-0.055	-0.045	0.002	-20.553	0	0.4427	0.306	0.579	0.07	6.346	0	0.2903	0.178	0.403	0.057	5.069	0	1.1262	1.02	1.233	0.054	20.699	0	-0.1531
Genital prolapse	genitourinary	0.4293	-0.331	1.189	0.388	1.107	1.53618	0.718205	3.2838	21	6510	11	8342	0.268317	0.510681	not_significant	0.186443	0.571352	1.4319	1.233	1.631	0.101	14.135	0	-0.0498	-0.055	-0.045	0.002	-20.55	0	0.4436	0.307	0.58	0.07	6.358	0	0.2902	0.178	0.402	0.057	5.068	0	1.1242	1.018	1.231	0.054	20.662	0	-0.1526
Genitourinary congenital anomalies	congenital anomalies	1.3852	-0.341	3.112	0.881	1.572	3.99562	0.711059	22.4659	10	6521	10	8343	0.115838	0.309903	not_significant	0.601585	0.936151	1.4322	1.234	1.631	0.101	14.138	0	-0.0498	-0.055	-0.045	0.002	-20.55	0	0.4432	0.306	0.58	0.07	6.353	0	0.2892	0.177	0.401	0.057	5.049	0	1.1259	1.019	1.233	0.054	20.699	0	-0.1535
GERD	digestive	0.0368	-0.087	0.16	0.063	0.584	1.03749	0.916677	1.17351	492	6039	785	7568	0.559459	0.77348	not_significant	0.015982	0.252232	1.4335	1.235	1.632	0.101	14.151	0	-0.05	-0.055	-0.045	0.002	-20.521	0	0.4449	0.308	0.582	0.07	6.368	0	0.2918	0.179	0.404	0.057	5.09	0	1.1287	1.022	1.236	0.055	20.665	0	-0.1525
Gingival and periodontal diseases	digestive	-1.5634	-3.061	-0.066	0.764	-2.046	0.209423	0.0468408	0.936131	10	6521	15	8338	0.0407717	0.155999	not_significant	-0.678976	1.38964	1.4326	1.234	1.631	0.101	14.143	0	-0.0498	-0.055	-0.045	0.002	-20.534	0	0.4422	0.305	0.579	0.07	6.338	0	0.2911	0.179	0.403	0.057	5.082	0	1.1248	1.018	1.231	0.054	20.677	0	-0.1535
Gingivitis	digestive	-0.1179	-1.469	1.233	0.689	-0.171	0.888785	0.230156	3.43151	10	6521	10	8343	0.864169	0.939674	not_significant	-0.0512033	0.0634014	1.4332	1.235	1.632	0.101	14.147	0	-0.0498	-0.055	-0.045	0.002	-20.553	0	0.4426	0.306	0.579	0.07	6.345	0	0.2903	0.178	0.403	0.057	5.069	0	1.1258	1.019	1.232	0.054	20.698	0	-0.1533
Glaucoma	sense organs	0.2514	-0.13	0.632	0.194	1.293	1.28582	0.878095	1.88137	51	6480	73	8280	0.195899	0.429904	not_significant	0.109182	0.707967	1.4384	1.24	1.637	0.101	14.188	0	-0.0501	-0.055	-0.045	0.002	-20.591	0	0.4435	0.307	0.58	0.07	6.357	0	0.2922	0.18	0.404	0.057	5.1	0	1.1278	1.021	1.234	0.054	20.725	0	-0.1516
Glossitis	digestive	-0.8345	-2.138	0.469	0.665	-1.254	0.434091	0.11789	1.59839	10	6521	11	8342	0.209702	0.44532	not_significant	-0.362419	0.678397	1.434	1.235	1.633	0.101	14.154	0	-0.0498	-0.055	-0.045	0.002	-20.555	0	0.4428	0.306	0.58	0.07	6.347	0	0.29	0.178	0.402	0.057	5.063	0	1.1256	1.019	1.232	0.054	20.694	0	-0.1526
Glossodynia	digestive	-1.1831	-2.766	0.4	0.808	-1.465	0.306328	0.0629132	1.49182	10	6521	11	8342	0.143033	0.351881	not_significant	-0.513814	0.844563	1.4324	1.234	1.631	0.101	14.137	0	-0.0498	-0.055	-0.045	0.002	-20.53	0	0.4419	0.305	0.579	0.07	6.334	0	0.2905	0.178	0.403	0.057	5.073	0	1.1253	1.019	1.232	0.054	20.688	0	-0.1533
Glucocorticoid deficiency	endocrine/metabolic	1.1245	0.372	1.877	0.384	2.93	3.07868	1.45063	6.53387	24	6507	11	8342	0.00339228	0.0232937	mi_significant	0.488364	2.46951	1.4329	1.234	1.632	0.101	14.137	0	-0.0499	-0.055	-0.045	0.002	-20.553	0	0.4406	0.304	0.577	0.07	6.314	0	0.2887	0.176	0.401	0.057	5.041	0	1.1253	1.019	1.232	0.054	20.685	0	-0.1558
Glycosuria or Acetonuria	endocrine/metabolic	0.4492	-0.694	1.592	0.583	0.77	1.56706	0.499574	4.91357	10	6521	10	8343	0.441133	0.685468	not_significant	0.195085	0.35543	1.4329	1.234	1.631	0.101	14.144	0	-0.0498	-0.055	-0.045	0.002	-20.557	0	0.4431	0.306	0.58	0.07	6.351	0	0.2904	0.178	0.403	0.057	5.07	0	1.1265	1.02	1.233	0.054	20.709	0	-0.1531
Gonococcal infections	infectious diseases	-0.2343	-2.263	1.794	1.035	-0.226	0.791124	0.104038	6.01346	10	6521	10	8343	0.820943	0.92359	not_significant	-0.101755	0.0856869	1.4332	1.235	1.632	0.101	14.147	0	-0.0498	-0.055	-0.045	0.002	-20.553	0	0.4427	0.306	0.579	0.07	6.346	0	0.2903	0.178	0.403	0.057	5.069	0	1.126	1.019	1.233	0.054	20.7	0	-0.1533
Gout	endocrine/metabolic	0.1685	-0.108	0.445	0.141	1.193	1.18353	0.897628	1.56049	93	6438	139	8214	0.232736	0.470695	not_significant	0.0731786	0.633136	1.4391	1.24	1.638	0.101	14.185	0	-0.0501	-0.055	-0.045	0.002	-20.577	0	0.4436	0.307	0.58	0.07	6.358	0	0.2904	0.178	0.403	0.057	5.072	0	1.1268	1.02	1.233	0.054	20.714	0	-0.1535
Gouty arthropathy	endocrine/metabolic	0.076	-0.291	0.443	0.187	0.406	1.07896	0.747516	1.55737	49	6482	83	8270	0.684997	0.852993	not_significant	0.0330064	0.164311	1.434	1.235	1.633	0.101	14.151	0	-0.0499	-0.055	-0.045	0.002	-20.544	0	0.4434	0.307	0.58	0.07	6.355	0	0.2905	0.178	0.403	0.057	5.073	0	1.1264	1.02	1.233	0.054	20.702	0	-0.1532
Graft-versus-host disease	infectious diseases	2.6535	0.572	4.735	1.062	2.499	14.2037	1.77181	113.863	16	6515	10	8343	0.0124578	0.0630322	not_significant	1.1524	1.90456	1.4308	1.232	1.629	0.101	14.115	0	-0.0498	-0.055	-0.045	0.002	-20.523	0	0.4435	0.307	0.58	0.07	6.358	0	0.2878	0.175	0.4	0.057	5.023	0	1.1232	1.017	1.23	0.054	20.641	0	-0.1531
Gram negative septicemia	infectious diseases	1.6727	0.434	2.912	0.632	2.646	5.32653	1.54342	18.3935	12	6519	10	8343	0.00814966	0.0449673	mi_significant	0.726444	2.08886	1.4364	1.238	1.635	0.101	14.175	0	-0.0499	-0.055	-0.045	0.002	-20.587	0	0.4413	0.305	0.578	0.07	6.325	0	0.2884	0.176	0.401	0.057	5.035	0	1.126	1.019	1.233	0.054	20.698	0	-0.1544
Gram positive septicemia	infectious diseases	2.3072	0.704	3.91	0.818	2.821	10.0463	2.02182	49.899	10	6521	10	8343	0.00478626	0.0298779	mi_significant	1.002	2.32	1.4389	1.24	1.638	0.101	14.19	0	-0.05	-0.055	-0.045	0.002	-20.615	0	0.4439	0.307	0.581	0.07	6.36	0	0.2904	0.178	0.403	0.057	5.069	0	1.1279	1.021	1.235	0.054	20.727	0	-0.1516
Graves' disease	endocrine/metabolic	0.3049	-0.494	1.103	0.407	0.748	1.35649	0.610181	3.01319	11	6520	17	8336	0.454366	0.692013	not_significant	0.132416	0.342594	1.4345	1.236	1.633	0.101	14.157	0	-0.0499	-0.055	-0.045	0.002	-20.564	0	0.443	0.306	0.58	0.07	6.35	0	0.2907	0.178	0.403	0.057	5.076	0	1.1264	1.02	1.233	0.054	20.707	0	-0.1535
Gross hematuria	genitourinary	0.0018	-0.484	0.488	0.248	0.007	1.0018	0.616313	1.62905	31	6500	47	8306	0.994158	0.995951	not_significant	0.00078173	0.00254468	1.433	1.234	1.632	0.101	14.144	0	-0.0498	-0.055	-0.045	0.002	-20.545	0	0.4427	0.306	0.579	0.07	6.346	0	0.2902	0.178	0.402	0.057	5.067	0	1.1258	1.019	1.232	0.054	20.699	0	-0.1534
H. pylori	infectious diseases	0.2426	-0.284	0.769	0.269	0.903	1.27456	0.752767	2.15761	29	6502	32	8321	0.366701	0.619184	not_significant	0.10536	0.435688	1.4328	1.234	1.631	0.101	14.144	0	-0.0499	-0.055	-0.045	0.002	-20.561	0	0.4435	0.307	0.58	0.07	6.356	0	0.2902	0.178	0.402	0.057	5.068	0	1.126	1.019	1.233	0.054	20.702	0	-0.1533
Hallucinations	mental disorders	0.2897	-1.088	1.667	0.703	0.412	1.33603	0.33689	5.29626	10	6521	10	8343	0.680154	0.852993	not_significant	0.125815	0.167393	1.4332	1.235	1.632	0.101	14.148	0	-0.0498	-0.055	-0.045	0.002	-20.557	0	0.4429	0.306	0.58	0.07	6.349	0	0.2902	0.178	0.402	0.057	5.068	0	1.1257	1.019	1.232	0.054	20.697	0	-0.1533
Hallux rigidus	musculoskeletal	-0.0294	-0.935	0.877	0.462	-0.064	0.971028	0.392586	2.40368	10	6521	15	8338	0.949334	0.979159	not_significant	-0.0127683	0.0225811	1.4329	1.234	1.631	0.101	14.144	0	-0.0498	-0.055	-0.045	0.002	-20.544	0	0.4426	0.306	0.579	0.07	6.344	0	0.2902	0.178	0.402	0.057	5.066	0	1.1258	1.019	1.232	0.054	20.696	0	-0.1534
Hallux valgus (Bunion)	musculoskeletal	-0.3652	-0.724	-0.007	0.183	-1.996	0.694058	0.484809	0.993024	44	6487	119	8234	0.0459127	0.170483	not_significant	-0.158604	1.33807	1.4323	1.234	1.631	0.101	14.136	0	-0.0497	-0.054	-0.045	0.002	-20.488	0	0.439	0.302	0.576	0.07	6.291	0	0.2875	0.175	0.4	0.057	5.019	0	1.1223	1.016	1.229	0.054	20.624	0	-0.1514
Hammer toe (acquired)	musculoskeletal	0.5924	-0.279	1.464	0.445	1.332	1.80832	0.75654	4.32322	11	6520	11	8342	0.182739	0.413025	not_significant	0.257276	0.738169	1.4332	1.235	1.632	0.101	14.148	0	-0.0499	-0.055	-0.045	0.002	-20.571	0	0.4442	0.307	0.581	0.07	6.367	0	0.2911	0.179	0.403	0.057	5.082	0	1.1274	1.021	1.234	0.054	20.721	0	-0.1524
Hearing loss	sense organs	-0.0836	-0.309	0.142	0.115	-0.726	0.919799	0.734181	1.15258	134	6397	242	8111	0.467623	0.704269	not_significant	-0.036307	0.330104	1.4302	1.231	1.629	0.101	14.108	0	-0.0497	-0.054	-0.045	0.002	-20.439	0	0.4416	0.305	0.578	0.07	6.329	0	0.2895	0.177	0.402	0.057	5.055	0	1.1248	1.018	1.231	0.054	20.674	0	-0.1537
Heart failure NOS	circulatory system	0.959	-0.252	2.17	0.618	1.552	2.60909	0.777245	8.75828	10	6521	10	8343	0.120683	0.31838	not_significant	0.416488	0.918355	1.4361	1.238	1.635	0.101	14.173	0	-0.0499	-0.055	-0.045	0.002	-20.584	0	0.4422	0.306	0.579	0.07	6.339	0	0.2888	0.177	0.401	0.057	5.042	0	1.1266	1.02	1.233	0.054	20.71	0	-0.1526
Heart failure with preserved EF [Diastolic heart failure]	circulatory system	2.5846	1.27	3.899	0.671	3.854	13.258	3.56085	49.3531	15	6516	10	8343	0.000116062	0.00126789	mi_significant	1.12248	3.93531	1.4516	1.253	1.65	0.101	14.304	0	-0.0504	-0.055	-0.046	0.002	-20.73	0	0.443	0.306	0.58	0.07	6.344	0	0.2898	0.177	0.402	0.057	5.057	0	1.1278	1.021	1.234	0.054	20.717	0	-0.1526
Heart failure with reduced EF [Systolic or combined heart failure]	circulatory system	1.2263	0.523	1.93	0.359	3.415	3.40859	1.68708	6.88951	23	6508	14	8339	0.000636701	0.00577436	mi_significant	0.532575	3.19606	1.4464	1.248	1.645	0.101	14.263	0	-0.0503	-0.055	-0.046	0.002	-20.701	0	0.4442	0.307	0.581	0.07	6.365	0	0.2891	0.177	0.401	0.057	5.044	0	1.1293	1.023	1.236	0.054	20.747	0	-0.15
Heart transplant/surgery	circulatory system	0.9668	0.044	1.89	0.471	2.053	2.62952	1.04498	6.61937	13	6518	10	8343	0.0400449	0.154812	not_significant	0.419876	1.39745	1.4354	1.237	1.634	0.101	14.165	0	-0.0499	-0.055	-0.045	0.002	-20.58	0	0.4434	0.307	0.58	0.07	6.356	0	0.29	0.178	0.402	0.057	5.063	0	1.1259	1.019	1.232	0.054	20.698	0	-0.1538
Heart valve replaced	circulatory system	0.6897	-0.218	1.597	0.463	1.489	1.99312	0.804125	4.9382	10	6521	11	8342	0.136411	0.342096	not_significant	0.299533	0.865149	1.4353	1.237	1.634	0.101	14.168	0	-0.0499	-0.055	-0.045	0.002	-20.589	0	0.4439	0.307	0.581	0.07	6.362	0	0.2917	0.179	0.404	0.057	5.092	0	1.1279	1.021	1.235	0.054	20.728	0	-0.1527
Heartburn	digestive	0.0722	-0.417	0.562	0.25	0.289	1.07487	0.659021	1.75418	31	6500	40	8313	0.772423	0.900184	not_significant	0.0313561	0.112145	1.4324	1.234	1.631	0.101	14.138	0	-0.0498	-0.055	-0.045	0.002	-20.551	0	0.4428	0.306	0.58	0.07	6.348	0	0.2901	0.178	0.402	0.057	5.066	0	1.1261	1.019	1.233	0.054	20.701	0	-0.1533
Helminthiases	infectious diseases	0.7057	-0.625	2.037	0.679	1.039	2.02526	0.535261	7.66757	10	6521	10	8343	0.298719	0.540469	not_significant	0.306482	0.524736	1.4336	1.235	1.632	0.101	14.15	0	-0.0499	-0.055	-0.045	0.002	-20.559	0	0.443	0.306	0.58	0.07	6.351	0	0.2902	0.178	0.402	0.057	5.068	0	1.1254	1.019	1.232	0.054	20.69	0	-0.1537
Hemangioma and lymphangioma, any site	neoplasms	-0.6448	-1.113	-0.176	0.239	-2.698	0.524767	0.328572	0.838618	26	6505	70	8283	0.00698581	0.0399743	con_significant	-0.280033	2.15578	1.4276	1.229	1.626	0.101	14.087	0	-0.0496	-0.054	-0.045	0.002	-20.45	0	0.4415	0.305	0.578	0.07	6.329	0	0.2939	0.182	0.406	0.057	5.129	0	1.1266	1.02	1.233	0.054	20.708	0	-0.1538
Hemangioma of skin and subcutaneous tissue	neoplasms	-0.88	-1.132	-0.629	0.128	-6.859	0.414783	0.322388	0.533125	86	6445	295	8058	6.95053e-12	4.7727e-10	con_significant	-0.382179	11.158	1.4101	1.211	1.609	0.101	13.91	0	-0.0492	-0.054	-0.044	0.002	-20.265	0	0.4441	0.307	0.581	0.07	6.367	0	0.3115	0.199	0.424	0.057	5.427	0	1.1434	1.037	1.25	0.055	20.977	0	-0.1269
Hemarthrosis	musculoskeletal	-0.521	-2.157	1.116	0.835	-0.624	0.593926	0.115672	3.05262	10	6521	10	8343	0.53266	0.756745	not_significant	-0.226267	0.27355	1.434	1.235	1.633	0.101	14.153	0	-0.0499	-0.055	-0.045	0.002	-20.559	0	0.4427	0.306	0.579	0.07	6.347	0	0.2904	0.178	0.403	0.057	5.072	0	1.1265	1.02	1.233	0.054	20.707	0	-0.1532
Hematemesis	digestive	0.7227	-0.055	1.5	0.397	1.822	2.05999	0.946485	4.48169	17	6514	12	8341	0.0684524	0.223148	not_significant	0.313865	1.16461	1.4313	1.233	1.63	0.101	14.128	0	-0.0498	-0.055	-0.045	0.002	-20.552	0	0.4405	0.304	0.577	0.07	6.312	0	0.2902	0.178	0.402	0.057	5.067	0	1.1273	1.021	1.234	0.054	20.721	0	-0.1529
Hematuria	genitourinary	0.2148	-0.04	0.47	0.13	1.652	1.23961	0.960789	1.59999	112	6419	157	8196	0.0985155	0.284688	not_significant	0.0932865	1.0065	1.4359	1.237	1.634	0.101	14.171	0	-0.05	-0.055	-0.045	0.002	-20.602	0	0.4443	0.308	0.581	0.07	6.368	0	0.2904	0.178	0.403	0.057	5.07	0	1.1288	1.022	1.235	0.054	20.738	0	-0.154
Hemiplegia	neurological	1.57	-0.04	3.18	0.821	1.911	4.80665	0.960789	24.0468	10	6521	10	8343	0.0559732	0.196862	not_significant	0.681842	1.25202	1.4353	1.237	1.634	0.101	14.162	0	-0.0499	-0.055	-0.045	0.002	-20.577	0	0.4405	0.304	0.577	0.07	6.312	0	0.2908	0.179	0.403	0.057	5.077	0	1.1267	1.02	1.233	0.054	20.711	0	-0.1524
Hemoptysis	respiratory	-0.0627	-0.633	0.508	0.291	-0.215	0.939225	0.530996	1.66196	22	6509	34	8319	0.829481	0.927863	not_significant	-0.0272303	0.0811937	1.433	1.234	1.632	0.101	14.145	0	-0.0498	-0.055	-0.045	0.002	-20.55	0	0.4427	0.306	0.579	0.07	6.346	0	0.2904	0.178	0.403	0.057	5.07	0	1.1259	1.019	1.232	0.054	20.7	0	-0.1532
Hemorrhage from gastrointestinal ulcer	digestive	0.0201	-1.277	1.317	0.662	0.03	1.0203	0.278873	3.73221	10	6521	10	8343	0.975814	0.987936	not_significant	0.00872932	0.0106329	1.433	1.234	1.632	0.101	14.146	0	-0.0498	-0.055	-0.045	0.002	-20.551	0	0.4427	0.306	0.579	0.07	6.346	0	0.2902	0.178	0.402	0.057	5.067	0	1.1258	1.019	1.232	0.054	20.699	0	-0.1534
Hemorrhage NOS	circulatory system	0.3653	-0.624	1.354	0.505	0.724	1.44095	0.535797	3.87289	10	6521	10	8343	0.469176	0.704742	not_significant	0.158648	0.328664	1.4326	1.234	1.631	0.101	14.142	0	-0.0498	-0.055	-0.045	0.002	-20.553	0	0.4431	0.306	0.58	0.07	6.352	0	0.2899	0.178	0.402	0.057	5.062	0	1.1262	1.02	1.233	0.054	20.704	0	-0.1536
Hemorrhage of gastrointestinal tract	digestive	0.4513	-0.164	1.067	0.314	1.437	1.57035	0.848742	2.90665	22	6509	23	8330	0.150778	0.364191	not_significant	0.195997	0.821661	1.4352	1.237	1.634	0.101	14.165	0	-0.0499	-0.055	-0.045	0.002	-20.579	0	0.4415	0.305	0.578	0.07	6.328	0	0.2899	0.178	0.402	0.057	5.062	0	1.1261	1.02	1.233	0.054	20.703	0	-0.1538
Hemorrhage of rectum and anus	digestive	-0.1103	-0.333	0.112	0.113	-0.972	0.895565	0.71677	1.11851	135	6396	231	8122	0.330833	0.580366	not_significant	-0.0479027	0.480392	1.4351	1.237	1.634	0.101	14.164	0	-0.0498	-0.055	-0.045	0.002	-20.54	0	0.4411	0.304	0.578	0.07	6.321	0	0.2895	0.177	0.402	0.057	5.055	0	1.1238	1.017	1.231	0.054	20.648	0	-0.1532
Hemorrhage or hematoma complicating a procedure	injuries & poisonings	-0.3144	-1.162	0.533	0.432	-0.727	0.730227	0.31286	1.70404	10	6521	17	8336	0.466931	0.704269	not_significant	-0.136542	0.330747	1.4334	1.235	1.632	0.101	14.149	0	-0.0498	-0.055	-0.045	0.002	-20.542	0	0.4422	0.305	0.579	0.07	6.338	0	0.2894	0.177	0.402	0.057	5.053	0	1.125	1.018	1.232	0.054	20.68	0	-0.1545
Hemorrhoids	circulatory system	-0.1099	-0.262	0.043	0.078	-1.413	0.895924	0.769511	1.04394	291	6240	551	7802	0.157715	0.374744	not_significant	-0.047729	0.802127	1.4255	1.227	1.624	0.101	14.055	0	-0.0494	-0.054	-0.045	0.002	-20.265	0	0.438	0.301	0.575	0.07	6.272	0	0.2886	0.176	0.401	0.057	5.038	0	1.1215	1.015	1.228	0.054	20.587	0	-0.1546
Hepatitis NOS	infectious diseases	-0.4481	-1.624	0.727	0.6	-0.747	0.638841	0.197109	2.06886	10	6521	10	8343	0.454903	0.692013	not_significant	-0.194607	0.342082	1.4335	1.235	1.632	0.101	14.149	0	-0.0498	-0.055	-0.045	0.002	-20.55	0	0.4423	0.306	0.579	0.07	6.34	0	0.2904	0.178	0.403	0.057	5.071	0	1.1252	1.019	1.232	0.054	20.686	0	-0.1536
Hepatomegaly	digestive	0.1398	-0.279	0.559	0.214	0.654	1.15004	0.75654	1.74892	42	6489	56	8297	0.513042	0.74063	not_significant	0.0607144	0.289847	1.4325	1.234	1.631	0.101	14.141	0	-0.0499	-0.055	-0.045	0.002	-20.558	0	0.4429	0.306	0.58	0.07	6.349	0	0.2904	0.178	0.403	0.057	5.071	0	1.1265	1.02	1.233	0.054	20.707	0	-0.1533
Hereditary and idiopathic peripheral neuropathy	neurological	0.2717	-0.198	0.741	0.24	1.134	1.31219	0.82037	2.09803	36	6495	44	8309	0.256743	0.499144	not_significant	0.117998	0.590502	1.4354	1.237	1.634	0.101	14.166	0	-0.05	-0.055	-0.045	0.002	-20.58	0	0.4424	0.306	0.579	0.07	6.342	0	0.291	0.179	0.403	0.057	5.082	0	1.1271	1.02	1.234	0.054	20.716	0	-0.1519
Hereditary hemochromatosis	hematopoietic	-0.4214	-1.472	0.629	0.536	-0.786	0.656128	0.229466	1.87573	10	6521	11	8342	0.431702	0.67886	not_significant	-0.183012	0.364816	1.4327	1.234	1.631	0.101	14.144	0	-0.0498	-0.055	-0.045	0.002	-20.545	0	0.4426	0.306	0.579	0.07	6.345	0	0.2901	0.178	0.402	0.057	5.065	0	1.1262	1.02	1.233	0.054	20.704	0	-0.1534
Hereditary retinal dystrophies	sense organs	0.1434	-1.132	1.419	0.651	0.22	1.15419	0.322388	4.13299	10	6521	10	8343	0.825625	0.927221	not_significant	0.0622778	0.083217	1.4331	1.235	1.632	0.101	14.146	0	-0.0498	-0.055	-0.045	0.002	-20.552	0	0.443	0.306	0.58	0.07	6.349	0	0.2905	0.178	0.403	0.057	5.071	0	1.1261	1.019	1.233	0.054	20.698	0	-0.1531
Herpes simplex	infectious diseases	-0.1885	-0.397	0.02	0.106	-1.774	0.828201	0.672334	1.0202	147	6384	299	8054	0.0760657	0.237932	not_significant	-0.0818645	1.11881	1.4329	1.234	1.631	0.101	14.145	0	-0.0496	-0.054	-0.045	0.002	-20.453	0	0.4369	0.3	0.574	0.07	6.257	0	0.2872	0.175	0.4	0.057	5.013	0	1.1206	1.014	1.227	0.054	20.575	0	-0.1538
Herpes zoster	infectious diseases	-0.4247	-0.789	-0.06	0.186	-2.282	0.653966	0.454299	0.941765	44	6487	107	8246	0.0224822	0.102593	not_significant	-0.184445	1.64816	1.4353	1.237	1.634	0.101	14.165	0	-0.0497	-0.054	-0.045	0.002	-20.508	0	0.4392	0.302	0.576	0.07	6.293	0	0.2881	0.176	0.4	0.057	5.03	0	1.1218	1.015	1.229	0.054	20.613	0	-0.1543
Herpes zoster with nervous system complications	infectious diseases	-0.2573	-1.313	0.798	0.539	-0.478	0.773136	0.269012	2.22109	10	6521	13	8340	0.632878	0.821432	not_significant	-0.111744	0.19868	1.4321	1.234	1.631	0.101	14.135	0	-0.0498	-0.055	-0.045	0.002	-20.539	0	0.4429	0.306	0.58	0.07	6.349	0	0.2909	0.179	0.403	0.057	5.078	0	1.1258	1.019	1.232	0.054	20.699	0	-0.153
Hidradenitis	dermatologic	0.5988	-0.347	1.544	0.482	1.241	1.81993	0.706805	4.68329	11	6520	10	8343	0.214497	0.450881	not_significant	0.260056	0.668579	1.4316	1.233	1.63	0.101	14.131	0	-0.0498	-0.055	-0.045	0.002	-20.547	0	0.4427	0.306	0.579	0.07	6.346	0	0.2907	0.178	0.403	0.057	5.075	0	1.1261	1.02	1.233	0.054	20.703	0	-0.1534
Hirsutism	dermatologic	0.6152	-0.943	2.174	0.795	0.774	1.85003	0.389458	8.79339	10	6521	10	8343	0.439179	0.684529	not_significant	0.267178	0.357358	1.4321	1.233	1.631	0.101	14.135	0	-0.0498	-0.055	-0.045	0.002	-20.549	0	0.4434	0.307	0.58	0.07	6.356	0	0.2907	0.178	0.403	0.057	5.076	0	1.1265	1.02	1.233	0.054	20.707	0	-0.1529
HIV infection, symptomatic	infectious diseases	1.059	0.134	1.984	0.472	2.243	2.88349	1.14339	7.27177	16	6515	10	8343	0.0249109	0.110528	not_significant	0.459918	1.60361	1.4371	1.238	1.636	0.101	14.179	0	-0.0499	-0.055	-0.045	0.002	-20.584	0	0.4428	0.306	0.58	0.07	6.348	0	0.2863	0.174	0.399	0.057	4.996	0	1.1236	1.017	1.23	0.054	20.654	0	-0.1542
Hodgkin's disease	neoplasms	1.9878	1.033	2.943	0.487	4.079	7.29946	2.80948	18.9727	35	6496	10	8343	4.51396e-05	0.000599093	mi_significant	0.863291	4.34544	1.4194	1.221	1.618	0.101	13.999	0	-0.0496	-0.054	-0.045	0.002	-20.436	0	0.4465	0.31	0.583	0.07	6.399	0	0.2896	0.177	0.402	0.057	5.052	0	1.124	1.017	1.231	0.054	20.65	0	-0.1542
Hormones and synthetic substitutes causing adverse effects in therapeutic use	injuries & poisonings	1.8832	0.94	2.826	0.481	3.915	6.57451	2.55998	16.8778	24	6507	10	8343	9.05474e-05	0.00104455	mi_significant	0.817863	4.04312	1.4435	1.245	1.642	0.101	14.241	0	-0.0501	-0.055	-0.045	0.002	-20.65	0	0.438	0.301	0.575	0.07	6.274	0	0.2814	0.169	0.394	0.057	4.909	0	1.1243	1.018	1.231	0.054	20.665	0	-0.1554
Human immunodeficiency virus [HIV] disease	infectious diseases	1.2625	-0.381	2.906	0.839	1.505	3.53425	0.683178	18.2835	10	6521	10	8343	0.132267	0.335484	not_significant	0.548297	0.87855	1.4351	1.236	1.634	0.101	14.163	0	-0.0499	-0.055	-0.045	0.002	-20.568	0	0.4428	0.306	0.58	0.07	6.347	0	0.2902	0.178	0.402	0.057	5.068	0	1.1238	1.017	1.23	0.054	20.656	0	-0.1539
Hydrocele	genitourinary	-0.0491	-0.325	0.227	0.141	-0.349	0.952086	0.722527	1.25483	90	6441	146	8207	0.727262	0.88053	not_significant	-0.0213239	0.138309	1.433	1.234	1.632	0.101	14.146	0	-0.0498	-0.055	-0.045	0.002	-20.538	0	0.4428	0.306	0.58	0.07	6.347	0	0.2905	0.178	0.403	0.057	5.073	0	1.1254	1.019	1.232	0.054	20.685	0	-0.1533
Hydrocephalus	neurological	0.7832	-0.91	2.477	0.864	0.906	2.18846	0.402524	11.9055	10	6521	10	8343	0.364756	0.616922	not_significant	0.340139	0.437997	1.4308	1.232	1.629	0.101	14.119	0	-0.0498	-0.055	-0.045	0.002	-20.525	0	0.4424	0.306	0.579	0.07	6.341	0	0.2898	0.178	0.402	0.057	5.061	0	1.1257	1.019	1.232	0.054	20.696	0	-0.1533
Hydronephrosis	genitourinary	0.0713	-0.336	0.478	0.208	0.343	1.0739	0.714623	1.61285	46	6485	60	8293	0.731372	0.881804	not_significant	0.0309652	0.135862	1.4326	1.234	1.631	0.101	14.141	0	-0.0498	-0.055	-0.045	0.002	-20.555	0	0.4427	0.306	0.579	0.07	6.347	0	0.2902	0.178	0.402	0.057	5.067	0	1.1262	1.02	1.233	0.054	20.701	0	-0.1531
Hyperaldosteronism	endocrine/metabolic	2.3707	0.166	4.575	1.125	2.108	10.7049	1.18057	97.028	10	6521	10	8343	0.035052	0.144828	not_significant	1.02958	1.45529	1.4367	1.238	1.635	0.101	14.176	0	-0.05	-0.055	-0.045	0.002	-20.589	0	0.4437	0.307	0.58	0.07	6.359	0	0.2895	0.177	0.402	0.057	5.054	0	1.1265	1.02	1.233	0.054	20.707	0	-0.1533
Hypercalcemia	endocrine/metabolic	0.347	-0.16	0.854	0.259	1.34	1.41482	0.852144	2.34902	29	6502	41	8312	0.180197	0.408561	not_significant	0.1507	0.744252	1.4373	1.239	1.636	0.101	14.18	0	-0.05	-0.055	-0.045	0.002	-20.588	0	0.441	0.304	0.578	0.07	6.321	0	0.2903	0.178	0.402	0.057	5.068	0	1.1262	1.02	1.233	0.054	20.704	0	-0.1552
Hypercholesterolemia	endocrine/metabolic	-0.0058	-0.161	0.15	0.079	-0.073	0.994217	0.851292	1.16183	282	6249	537	7816	0.941573	0.975394	not_significant	-0.00251891	0.026146	1.4323	1.233	1.632	0.102	14.078	0	-0.0498	-0.055	-0.045	0.002	-20.345	0	0.4427	0.306	0.579	0.07	6.345	0	0.2902	0.178	0.402	0.057	5.068	0	1.1257	1.019	1.232	0.054	20.682	0	-0.1532
Hypercoagulable state	hematopoietic	0.052	-2.215	2.319	1.157	0.045	1.05338	0.109154	10.1655	10	6521	10	8343	0.964164	0.986651	not_significant	0.0225833	0.0158491	1.4331	1.234	1.632	0.101	14.141	0	-0.0498	-0.055	-0.045	0.002	-20.542	0	0.4427	0.306	0.579	0.07	6.346	0	0.2902	0.178	0.402	0.057	5.068	0	1.1258	1.019	1.232	0.054	20.699	0	-0.1534
Hyperestrogenism	endocrine/metabolic	1.5421	0.504	2.58	0.53	2.912	4.6744	1.65533	13.1971	15	6516	10	8343	0.00359453	0.0241516	mi_significant	0.669726	2.44436	1.4368	1.238	1.635	0.101	14.176	0	-0.0499	-0.055	-0.045	0.002	-20.58	0	0.4311	0.294	0.568	0.07	6.168	0	0.288	0.176	0.4	0.057	5.028	0	1.126	1.019	1.233	0.054	20.701	0	-0.1549
Hyperglyceridemia	endocrine/metabolic	0.1319	-0.115	0.379	0.126	1.047	1.14099	0.891366	1.46082	116	6415	168	8185	0.295136	0.535412	not_significant	0.0572834	0.529978	1.433	1.234	1.632	0.101	14.143	0	-0.0499	-0.055	-0.045	0.002	-20.57	0	0.4438	0.307	0.581	0.07	6.361	0	0.2907	0.178	0.403	0.057	5.075	0	1.1282	1.022	1.235	0.054	20.723	0	-0.1532
Hyperhidrosis	dermatologic	-0.3789	-0.734	-0.024	0.181	-2.093	0.684614	0.479985	0.976286	48	6483	104	8249	0.0363573	0.148501	not_significant	-0.164554	1.43941	1.4339	1.235	1.633	0.101	14.154	0	-0.0498	-0.055	-0.045	0.002	-20.517	0	0.4412	0.304	0.578	0.07	6.323	0	0.2906	0.178	0.403	0.057	5.073	0	1.1241	1.018	1.231	0.054	20.664	0	-0.1532
Hyperlipidemia	endocrine/metabolic	0.1109	0.006	0.216	0.054	2.067	1.11728	1.00602	1.2411	737	5794	1172	7181	0.0387458	0.153163	not_significant	0.0481633	1.41178	1.4521	1.253	1.652	0.102	14.269	0	-0.0508	-0.056	-0.046	0.002	-20.547	0	0.453	0.316	0.59	0.07	6.475	0	0.2992	0.187	0.412	0.057	5.209	0	1.1368	1.03	1.244	0.055	20.794	0	-0.1496
Hypermetropia	sense organs	-0.078	-0.583	0.427	0.258	-0.303	0.924964	0.558221	1.53265	26	6505	46	8307	0.762173	0.895666	not_significant	-0.033875	0.117947	1.4325	1.234	1.631	0.101	14.138	0	-0.0498	-0.055	-0.045	0.002	-20.512	0	0.4419	0.305	0.579	0.07	6.331	0	0.2895	0.177	0.402	0.057	5.05	0	1.1253	1.019	1.232	0.054	20.679	0	-0.1542
Hyperosmolality and/or hypernatremia	endocrine/metabolic	2.2491	0.885	3.613	0.696	3.232	9.4792	2.42298	37.0771	12	6519	10	8343	0.00122964	0.00974257	mi_significant	0.976772	2.91022	1.445	1.246	1.644	0.101	14.253	0	-0.0502	-0.055	-0.045	0.002	-20.668	0	0.4384	0.302	0.575	0.07	6.281	0	0.2863	0.174	0.399	0.057	4.995	0	1.127	1.02	1.234	0.054	20.714	0	-0.153
Hyperparathyroidism	endocrine/metabolic	1.5883	0.748	2.429	0.429	3.704	4.89542	2.11277	11.3475	22	6509	10	8343	0.000212024	0.00218385	mi_significant	0.68979	3.67361	1.443	1.244	1.642	0.101	14.229	0	-0.0501	-0.055	-0.045	0.002	-20.656	0	0.441	0.304	0.578	0.07	6.317	0	0.2908	0.179	0.403	0.057	5.076	0	1.1265	1.02	1.233	0.054	20.702	0	-0.155
Hyperplasia of prostate	genitourinary	0.7317	0.496	0.968	0.12	6.073	2.07861	1.64214	2.63267	144	6387	204	8149	1.25431e-09	5.48094e-08	mi_significant	0.317773	8.9016	1.5533	1.351	1.756	0.103	15.027	0	-0.0534	-0.058	-0.049	0.003	-21.355	0	0.4393	0.302	0.576	0.07	6.292	0	0.2926	0.18	0.405	0.057	5.102	0	1.1437	1.037	1.251	0.055	20.955	0	-0.1472
Hyperpotassemia	endocrine/metabolic	0.6339	0.251	1.017	0.195	3.245	1.88495	1.28531	2.76489	62	6469	55	8298	0.00117426	0.00940716	mi_significant	0.275299	2.93023	1.4404	1.242	1.639	0.101	14.209	0	-0.0502	-0.055	-0.045	0.002	-20.667	0	0.4437	0.307	0.58	0.07	6.357	0	0.2906	0.178	0.403	0.057	5.073	0	1.1297	1.023	1.236	0.054	20.756	0	-0.1507
Hypersensitivity angiitis	circulatory system	0.4149	-2.389	3.219	1.43	0.29	1.51422	0.0917214	25.0031	10	6521	10	8343	0.77176	0.900184	not_significant	0.180189	0.112518	1.4327	1.234	1.631	0.101	14.142	0	-0.0498	-0.055	-0.045	0.002	-20.549	0	0.4427	0.306	0.579	0.07	6.346	0	0.2902	0.178	0.402	0.057	5.068	0	1.1258	1.019	1.232	0.054	20.699	0	-0.1536
Hypersomnia	neurological	-0.2134	-0.542	0.115	0.168	-1.273	0.807833	0.581584	1.12187	56	6475	124	8229	0.202888	0.437316	not_significant	-0.0926784	0.692744	1.433	1.234	1.632	0.101	14.146	0	-0.0498	-0.055	-0.045	0.002	-20.524	0	0.4414	0.305	0.578	0.07	6.327	0	0.2901	0.178	0.402	0.057	5.066	0	1.1239	1.017	1.231	0.054	20.656	0	-0.1516
Hypertensive chronic kidney disease	circulatory system	2.0837	1.547	2.621	0.274	7.605	8.03414	4.69736	13.7495	74	6457	19	8334	2.85594e-14	3.1679e-12	mi_significant	0.904939	13.5443	1.4888	1.289	1.689	0.102	14.607	0	-0.0516	-0.056	-0.047	0.002	-21.094	0	0.4359	0.299	0.573	0.07	6.225	0	0.2902	0.178	0.403	0.057	5.057	0	1.1303	1.023	1.237	0.055	20.732	0	-0.1491
Hypertensive heart and/or renal disease	circulatory system	1.8427	0.75	2.936	0.558	3.305	6.31356	2.117	18.8403	13	6518	10	8343	0.000951458	0.0080706	mi_significant	0.800274	3.02161	1.4484	1.25	1.647	0.101	14.276	0	-0.0503	-0.055	-0.046	0.002	-20.7	0	0.442	0.305	0.579	0.07	6.332	0	0.2893	0.177	0.402	0.057	5.049	0	1.1281	1.021	1.235	0.054	20.726	0	-0.1508
Hypertensive heart disease	circulatory system	0.9076	0.113	1.702	0.405	2.239	2.47837	1.11963	5.48491	14	6517	13	8340	0.0251762	0.111362	not_significant	0.394166	1.59901	1.4422	1.243	1.641	0.101	14.223	0	-0.0501	-0.055	-0.045	0.002	-20.641	0	0.4406	0.304	0.577	0.07	6.314	0	0.2899	0.178	0.402	0.057	5.061	0	1.1285	1.022	1.235	0.054	20.738	0	-0.1511
Hypertrophic obstructive cardiomyopathy	circulatory system	-0.0219	-1.433	1.389	0.72	-0.03	0.978338	0.238592	4.01084	10	6521	10	8343	0.975702	0.987936	not_significant	-0.00951105	0.0106827	1.433	1.234	1.632	0.101	14.146	0	-0.0498	-0.055	-0.045	0.002	-20.552	0	0.4427	0.306	0.579	0.07	6.346	0	0.2902	0.178	0.402	0.057	5.067	0	1.1258	1.019	1.232	0.054	20.699	0	-0.1534
Hypertrophy of breast (Gynecomastia)	genitourinary	0.9219	0.452	1.391	0.24	3.849	2.51406	1.57145	4.01887	53	6478	30	8323	0.000118794	0.00128798	mi_significant	0.400376	3.92521	1.4271	1.228	1.626	0.101	14.075	0	-0.0498	-0.055	-0.045	0.002	-20.524	0	0.4409	0.304	0.578	0.07	6.316	0	0.2911	0.179	0.403	0.057	5.08	0	1.128	1.021	1.235	0.054	20.728	0	-0.1552
Hypertrophy of salivary gland	digestive	-0.6296	-2.803	1.543	1.109	-0.568	0.532805	0.0606279	4.67861	10	6521	10	8343	0.570123	0.781487	not_significant	-0.273432	0.244032	1.4321	1.233	1.631	0.101	14.136	0	-0.0498	-0.055	-0.045	0.002	-20.538	0	0.4425	0.306	0.579	0.07	6.344	0	0.2903	0.178	0.403	0.057	5.069	0	1.1256	1.019	1.232	0.054	20.695	0	-0.1532
Hyperventilation	respiratory	1.2699	-0.314	2.854	0.808	1.571	3.5605	0.730519	17.3571	10	6521	10	8343	0.116139	0.310135	not_significant	0.551511	0.93502	1.4352	1.237	1.634	0.101	14.17	0	-0.0499	-0.055	-0.045	0.002	-20.584	0	0.4433	0.307	0.58	0.07	6.354	0	0.289	0.177	0.401	0.057	5.045	0	1.1262	1.02	1.233	0.054	20.704	0	-0.1532
Hypocalcemia	endocrine/metabolic	1.4872	0.607	2.367	0.449	3.312	4.42469	1.83492	10.6653	22	6509	10	8343	0.000927874	0.00796425	mi_significant	0.645883	3.03251	1.4325	1.234	1.631	0.101	14.132	0	-0.0499	-0.055	-0.045	0.002	-20.574	0	0.4424	0.306	0.579	0.07	6.337	0	0.2915	0.179	0.404	0.057	5.087	0	1.1277	1.021	1.234	0.054	20.72	0	-0.1513
Hypoglycemia	endocrine/metabolic	0.9335	0.308	1.559	0.319	2.923	2.5434	1.3607	4.75406	28	6503	17	8336	0.00346444	0.0234541	mi_significant	0.405414	2.46037	1.431	1.232	1.63	0.101	14.119	0	-0.0499	-0.055	-0.045	0.002	-20.579	0	0.445	0.308	0.582	0.07	6.378	0	0.2932	0.181	0.406	0.057	5.118	0	1.1307	1.024	1.237	0.054	20.77	0	-0.1495
Hypoparathyroidism	endocrine/metabolic	2.1543	-0.024	4.332	1.111	1.939	8.62185	0.976286	76.0963	10	6521	10	8343	0.0525565	0.188994	not_significant	0.935601	1.27937	1.4331	1.234	1.632	0.101	14.142	0	-0.0499	-0.055	-0.045	0.002	-20.562	0	0.4443	0.308	0.581	0.07	6.368	0	0.2918	0.18	0.404	0.057	5.094	0	1.1264	1.02	1.233	0.054	20.703	0	-0.1526
Hypopotassemia	endocrine/metabolic	0.9335	0.512	1.355	0.215	4.345	2.5434	1.66863	3.87676	76	6455	37	8316	1.39244e-05	0.000213607	mi_significant	0.405414	4.85622	1.4323	1.234	1.631	0.101	14.128	0	-0.05	-0.055	-0.045	0.002	-20.591	0	0.442	0.305	0.579	0.07	6.333	0	0.2857	0.173	0.398	0.057	4.984	0	1.1251	1.018	1.232	0.054	20.671	0	-0.1503
Hyposmolality and/or hyponatremia	endocrine/metabolic	1.1598	0.752	1.568	0.208	5.57	3.1893	2.12124	4.79704	75	6456	40	8313	2.5407e-08	8.32658e-07	mi_significant	0.503695	7.59505	1.4458	1.247	1.645	0.101	14.254	0	-0.0505	-0.055	-0.046	0.002	-20.772	0	0.446	0.309	0.583	0.07	6.385	0	0.2931	0.181	0.405	0.057	5.111	0	1.1333	1.027	1.24	0.054	20.802	0	-0.1477
Hypotension	circulatory system	1.4799	-0.191	3.151	0.853	1.735	4.39251	0.826133	23.3594	10	6521	10	8343	0.082666	0.251486	not_significant	0.642712	1.08267	1.4338	1.235	1.632	0.101	14.151	0	-0.0499	-0.055	-0.045	0.002	-20.572	0	0.4445	0.308	0.581	0.07	6.37	0	0.2909	0.179	0.403	0.057	5.079	0	1.1272	1.021	1.234	0.054	20.719	0	-0.1519
Hypotension NOS	circulatory system	0.9908	0.437	1.544	0.282	3.508	2.69339	1.54806	4.68329	40	6491	22	8331	0.000450918	0.00442329	mi_significant	0.430299	3.3459	1.4356	1.237	1.634	0.101	14.168	0	-0.05	-0.055	-0.045	0.002	-20.626	0	0.4444	0.308	0.581	0.07	6.368	0	0.2881	0.176	0.4	0.057	5.028	0	1.1286	1.022	1.235	0.054	20.735	0	-0.1498
Hypothermia/Chills	symptoms	0.0658	-0.559	0.691	0.319	0.206	1.06801	0.571781	1.99571	20	6511	24	8329	0.836492	0.927863	not_significant	0.0285766	0.077538	1.4328	1.234	1.631	0.101	14.144	0	-0.0498	-0.055	-0.045	0.002	-20.553	0	0.4427	0.306	0.579	0.07	6.347	0	0.2901	0.178	0.402	0.057	5.067	0	1.1258	1.019	1.232	0.054	20.698	0	-0.1534
Hypothyroidism NOS	endocrine/metabolic	0.6803	0.438	0.923	0.124	5.503	1.97447	1.5496	2.51683	154	6377	144	8209	3.74241e-08	1.1482e-06	mi_significant	0.295451	7.42685	1.4491	1.25	1.648	0.101	14.294	0	-0.0508	-0.056	-0.046	0.002	-20.892	0	0.4565	0.32	0.594	0.07	6.533	0	0.3008	0.188	0.413	0.057	5.244	0	1.1433	1.036	1.25	0.055	20.949	0	-0.1438
Hypotony of eye	sense organs	1.0407	-1.743	3.824	1.42	0.733	2.8312	0.174995	45.787	10	6521	10	8343	0.463702	0.701634	not_significant	0.45197	0.333761	1.4342	1.236	1.633	0.101	14.155	0	-0.0499	-0.055	-0.045	0.002	-20.561	0	0.4428	0.306	0.579	0.07	6.347	0	0.2899	0.178	0.402	0.057	5.061	0	1.1259	1.019	1.232	0.054	20.7	0	-0.1536
Hypoventilation	respiratory	1.2818	-0.382	2.945	0.849	1.51	3.60312	0.682495	19.0107	10	6521	10	8343	0.130977	0.333564	not_significant	0.556679	0.882804	1.4351	1.236	1.634	0.101	14.162	0	-0.0499	-0.055	-0.045	0.002	-20.567	0	0.4401	0.303	0.577	0.07	6.305	0	0.2892	0.177	0.401	0.057	5.05	0	1.1255	1.019	1.232	0.054	20.693	0	-0.1536
Hypovolemia	endocrine/metabolic	0.707	0.391	1.023	0.161	4.384	2.0279	1.47846	2.78153	103	6428	78	8275	1.1653e-05	0.000184656	mi_significant	0.307046	4.93356	1.4338	1.235	1.632	0.101	14.152	0	-0.0501	-0.055	-0.045	0.002	-20.658	0	0.4475	0.311	0.584	0.07	6.411	0	0.2898	0.178	0.402	0.057	5.058	0	1.1302	1.023	1.237	0.054	20.757	0	-0.1517
Iatrogenic endocrine disorders	endocrine/metabolic	0.8529	-1.104	2.81	0.999	0.854	2.34644	0.331542	16.6099	10	6521	10	8343	0.393065	0.647771	not_significant	0.37041	0.405536	1.434	1.235	1.633	0.101	14.157	0	-0.0499	-0.055	-0.045	0.002	-20.565	0	0.4421	0.305	0.579	0.07	6.337	0	0.2893	0.177	0.402	0.057	5.052	0	1.1257	1.019	1.232	0.054	20.695	0	-0.1533
Iatrogenic hypotension	circulatory system	2.7477	0.537	4.959	1.128	2.436	15.6067	1.71087	142.451	10	6521	10	8343	0.0148654	0.0724186	not_significant	1.19331	1.82782	1.4381	1.239	1.637	0.101	14.188	0	-0.05	-0.055	-0.045	0.002	-20.608	0	0.4418	0.305	0.579	0.07	6.331	0	0.2914	0.179	0.404	0.057	5.087	0	1.1268	1.02	1.233	0.054	20.708	0	-0.1515
Ichthyosis congenita	dermatologic	-0.5868	-2.295	1.121	0.872	-0.673	0.556104	0.100761	3.06792	10	6521	10	8343	0.500789	0.73158	not_significant	-0.254844	0.300346	1.4336	1.235	1.632	0.101	14.15	0	-0.0498	-0.055	-0.045	0.002	-20.554	0	0.4423	0.306	0.579	0.07	6.34	0	0.2899	0.178	0.402	0.057	5.063	0	1.1256	1.019	1.232	0.054	20.694	0	-0.1535
Idiopathic fibrosing alveolitis	respiratory	0.7412	-0.802	2.284	0.787	0.941	2.09845	0.448431	9.81587	10	6521	10	8343	0.346532	0.597727	not_significant	0.321899	0.460256	1.4342	1.236	1.633	0.101	14.155	0	-0.0499	-0.055	-0.045	0.002	-20.563	0	0.4425	0.306	0.579	0.07	6.342	0	0.2902	0.178	0.402	0.057	5.067	0	1.1257	1.019	1.232	0.054	20.697	0	-0.1534
Ileostomy status	digestive	0.2526	-0.696	1.201	0.484	0.522	1.28737	0.498576	3.32344	10	6521	10	8343	0.601744	0.799448	not_significant	0.109703	0.220588	1.4328	1.234	1.631	0.101	14.144	0	-0.0498	-0.055	-0.045	0.002	-20.556	0	0.4431	0.306	0.58	0.07	6.351	0	0.2898	0.178	0.402	0.057	5.061	0	1.1259	1.019	1.232	0.054	20.699	0	-0.1532
Immunity deficiency	endocrine/metabolic	0.9729	0.532	1.414	0.225	4.322	2.64561	1.70233	4.11237	80	6451	31	8322	1.54498e-05	0.000231019	mi_significant	0.422525	4.81108	1.4263	1.228	1.625	0.101	14.064	0	-0.0497	-0.054	-0.045	0.002	-20.459	0	0.4393	0.303	0.576	0.07	6.296	0	0.281	0.169	0.393	0.057	4.901	0	1.1156	1.009	1.222	0.054	20.489	0	-0.1597
Impacted cerumen	sense organs	-0.128	-0.324	0.068	0.1	-1.282	0.879853	0.72325	1.07037	171	6360	326	8027	0.199744	0.434436	not_significant	-0.0555897	0.699526	1.4332	1.235	1.632	0.101	14.146	0	-0.0497	-0.054	-0.045	0.002	-20.473	0	0.4391	0.302	0.576	0.07	6.29	0	0.2878	0.176	0.4	0.057	5.024	0	1.122	1.015	1.229	0.054	20.599	0	-0.1535
Impaction of intestine	digestive	1.2559	0.104	2.408	0.588	2.136	3.511	1.1096	11.1117	11	6520	10	8343	0.0326668	0.138139	not_significant	0.54543	1.48589	1.433	1.235	1.632	0.101	14.148	0	-0.0499	-0.055	-0.045	0.002	-20.571	0	0.4432	0.306	0.58	0.07	6.353	0	0.2894	0.177	0.402	0.057	5.051	0	1.1267	1.02	1.233	0.054	20.709	0	-0.1529
Impaired fasting glucose	endocrine/metabolic	0.0118	-0.243	0.267	0.13	0.09	1.01187	0.784272	1.30604	102	6429	181	8172	0.927996	0.972507	not_significant	0.00512467	0.032454	1.4333	1.235	1.632	0.101	14.141	0	-0.0498	-0.055	-0.045	0.002	-20.51	0	0.4429	0.306	0.58	0.07	6.346	0	0.2903	0.178	0.403	0.057	5.068	0	1.126	1.019	1.233	0.054	20.69	0	-0.1534
Impetigo	dermatologic	-0.1468	-0.826	0.532	0.347	-0.424	0.863467	0.437797	1.70233	14	6517	25	8328	0.671922	0.849237	not_significant	-0.0637544	0.172681	1.4331	1.235	1.632	0.101	14.147	0	-0.0498	-0.055	-0.045	0.002	-20.55	0	0.4426	0.306	0.579	0.07	6.344	0	0.2901	0.178	0.402	0.057	5.065	0	1.1257	1.019	1.232	0.054	20.697	0	-0.1532
Incisional hernia	digestive	0.4451	-0.462	1.352	0.463	0.962	1.56065	0.630022	3.86515	10	6521	11	8342	0.336028	0.587108	not_significant	0.193304	0.473624	1.4348	1.236	1.633	0.101	14.161	0	-0.0499	-0.055	-0.045	0.002	-20.57	0	0.442	0.305	0.579	0.07	6.335	0	0.2898	0.178	0.402	0.057	5.06	0	1.1261	1.019	1.233	0.054	20.703	0	-0.1532
Infantile cerebral palsy	neurological	0.1724	-1.012	1.356	0.604	0.285	1.18815	0.363491	3.88064	10	6521	10	8343	0.775332	0.900184	not_significant	0.0748724	0.110512	1.4325	1.234	1.631	0.101	14.139	0	-0.0498	-0.055	-0.045	0.002	-20.551	0	0.443	0.306	0.58	0.07	6.35	0	0.2904	0.178	0.403	0.057	5.07	0	1.126	1.019	1.233	0.054	20.701	0	-0.1531
Infection with drug-resistant microorganisms	infectious diseases	1.8051	0.699	2.911	0.564	3.199	6.08058	2.01174	18.3752	17	6514	10	8343	0.00137778	0.0107976	mi_significant	0.783945	2.86082	1.4418	1.243	1.641	0.101	14.222	0	-0.0501	-0.055	-0.045	0.002	-20.633	0	0.4414	0.305	0.578	0.07	6.325	0	0.2839	0.172	0.396	0.057	4.954	0	1.1257	1.019	1.232	0.054	20.692	0	-0.1532
Infection/inflammation of internal prosthetic device; implant; and graft	infectious diseases	1.4129	0.336	2.489	0.549	2.572	4.10785	1.39934	12.0492	13	6518	10	8343	0.0101021	0.05336	not_significant	0.613615	1.99559	1.4362	1.238	1.635	0.101	14.172	0	-0.05	-0.055	-0.045	0.002	-20.601	0	0.4433	0.307	0.58	0.07	6.354	0	0.2923	0.18	0.405	0.057	5.103	0	1.1276	1.021	1.234	0.054	20.722	0	-0.1522
Infectious mononucleosis	infectious diseases	0.612	-0.861	2.085	0.752	0.814	1.84412	0.422739	8.04459	10	6521	10	8343	0.415524	0.667245	not_significant	0.265788	0.381404	1.4318	1.233	1.63	0.101	14.132	0	-0.0498	-0.055	-0.045	0.002	-20.541	0	0.4425	0.306	0.579	0.07	6.343	0	0.2897	0.177	0.402	0.057	5.058	0	1.1259	1.019	1.233	0.054	20.7	0	-0.1535
Infective connective tissue disorders	musculoskeletal	-0.5624	-2.197	1.072	0.834	-0.674	0.56984	0.111136	2.92122	10	6521	10	8343	0.500026	0.73158	not_significant	-0.244247	0.301007	1.4326	1.234	1.631	0.101	14.142	0	-0.0498	-0.055	-0.045	0.002	-20.546	0	0.4425	0.306	0.579	0.07	6.343	0	0.2903	0.178	0.403	0.057	5.069	0	1.1258	1.019	1.232	0.054	20.698	0	-0.1532
Infertility, female	genitourinary	3.8738	2.459	5.288	0.722	5.368	48.1249	11.6931	197.947	74	6457	10	8343	7.94934e-08	2.20441e-06	mi_significant	1.68237	7.09967	1.406	1.207	1.605	0.102	13.831	0	-0.0498	-0.055	-0.045	0.002	-20.473	0	0.4486	0.311	0.586	0.07	6.393	0	0.3067	0.194	0.419	0.058	5.328	0	1.1431	1.036	1.25	0.055	20.912	0	-0.1317
Infestation (lice, mites)	infectious diseases	-0.1683	-1.013	0.676	0.431	-0.391	0.8451	0.363128	1.966	10	6521	16	8337	0.696097	0.857924	not_significant	-0.0730918	0.15733	1.4338	1.235	1.632	0.101	14.151	0	-0.0498	-0.055	-0.045	0.002	-20.554	0	0.4422	0.305	0.579	0.07	6.337	0	0.29	0.178	0.402	0.057	5.065	0	1.1253	1.019	1.232	0.054	20.685	0	-0.1537
Inflammation of eyelids	sense organs	-0.3686	-0.64	-0.097	0.138	-2.664	0.691702	0.527292	0.907556	80	6451	198	8155	0.00772041	0.0433184	con_significant	-0.160081	2.11236	1.428	1.229	1.627	0.101	14.09	0	-0.0495	-0.054	-0.045	0.002	-20.366	0	0.4386	0.302	0.575	0.07	6.284	0	0.2846	0.172	0.397	0.057	4.966	0	1.12	1.013	1.227	0.054	20.573	0	-0.155
Inflammation of the eye	sense organs	0.7105	-1.338	2.759	1.045	0.68	2.03501	0.26237	15.7841	10	6521	10	8343	0.496587	0.730226	not_significant	0.308566	0.304005	1.4341	1.236	1.633	0.101	14.154	0	-0.0499	-0.055	-0.045	0.002	-20.56	0	0.4428	0.306	0.579	0.07	6.347	0	0.29	0.178	0.402	0.057	5.064	0	1.1257	1.019	1.232	0.054	20.696	0	-0.1536
Inflammatory and toxic neuropathy	neurological	0.5308	0.157	0.904	0.191	2.785	1.70029	1.17	2.46946	65	6466	63	8290	0.00535269	0.032845	mi_significant	0.230524	2.27143	1.4452	1.246	1.644	0.101	14.251	0	-0.0502	-0.055	-0.045	0.002	-20.665	0	0.4371	0.3	0.574	0.07	6.262	0	0.2859	0.174	0.398	0.057	4.99	0	1.1242	1.018	1.231	0.054	20.663	0	-0.1565
Influenza	respiratory	-0.4925	-0.765	-0.22	0.139	-3.543	0.611097	0.465334	0.802519	78	6453	199	8154	0.000396283	0.00396833	con_significant	-0.21389	3.40199	1.4428	1.244	1.642	0.101	14.235	0	-0.0497	-0.054	-0.045	0.002	-20.503	0	0.4333	0.296	0.57	0.07	6.205	0	0.2847	0.172	0.397	0.057	4.968	0	1.1142	1.007	1.221	0.054	20.448	0	-0.1585
Infusion and transfusion reaction	injuries & poisonings	1.9471	-0.349	4.243	1.171	1.662	7.00833	0.705393	69.6164	10	6521	10	8343	0.0964691	0.281027	not_significant	0.845615	1.01561	1.4305	1.232	1.629	0.101	14.117	0	-0.0498	-0.055	-0.045	0.002	-20.533	0	0.444	0.307	0.581	0.07	6.365	0	0.2909	0.179	0.403	0.057	5.079	0	1.1258	1.019	1.232	0.054	20.692	0	-0.1521
Ingrowing nail	dermatologic	0.3227	-0.079	0.725	0.205	1.574	1.38085	0.92404	2.06473	47	6484	59	8294	0.115554	0.30972	not_significant	0.140147	0.937213	1.4306	1.232	1.629	0.101	14.121	0	-0.0499	-0.055	-0.045	0.002	-20.572	0	0.4452	0.308	0.582	0.07	6.38	0	0.2931	0.181	0.405	0.057	5.115	0	1.1295	1.023	1.236	0.054	20.745	0	-0.1521
Inguinal hernia	digestive	-0.0524	-0.308	0.203	0.13	-0.402	0.948949	0.734915	1.22507	99	6432	189	8164	0.68801	0.854604	not_significant	-0.022757	0.162405	1.4317	1.233	1.63	0.101	14.126	0	-0.0498	-0.055	-0.045	0.002	-20.487	0	0.4423	0.306	0.579	0.07	6.34	0	0.2899	0.178	0.402	0.057	5.062	0	1.1251	1.018	1.232	0.054	20.676	0	-0.1532
Injuries to the nervous system	injuries & poisonings	1.3536	0.651	2.056	0.358	3.776	3.87134	1.91746	7.81465	31	6500	12	8341	0.0001592	0.00166352	mi_significant	0.587861	3.79806	1.4275	1.229	1.626	0.101	14.085	0	-0.0499	-0.055	-0.045	0.002	-20.558	0	0.4481	0.311	0.585	0.07	6.419	0	0.2921	0.18	0.404	0.057	5.096	0	1.1298	1.023	1.237	0.054	20.754	0	-0.1505
Injury to blood vessels		0.7055	-1.005	2.416	0.873	0.808	2.02486	0.366045	11.201	10	6521	10	8343	0.418846	0.668116	not_significant	0.306395	0.377945	1.434	1.235	1.633	0.101	14.154	0	-0.0499	-0.055	-0.045	0.002	-20.561	0	0.4422	0.305	0.579	0.07	6.339	0	0.2902	0.178	0.402	0.057	5.068	0	1.1257	1.019	1.232	0.054	20.696	0	-0.1539
Injury to other and unspecified nerves		0.1493	-1.851	2.15	1.021	0.146	1.16102	0.15708	8.58486	10	6521	10	8343	0.883659	0.95131	not_significant	0.0648402	0.0537154	1.4328	1.234	1.631	0.101	14.142	0	-0.0498	-0.055	-0.045	0.002	-20.551	0	0.4428	0.306	0.58	0.07	6.348	0	0.2903	0.178	0.403	0.057	5.069	0	1.1259	1.019	1.233	0.054	20.7	0	-0.1533
Injury, NOS		-0.3813	-0.506	-0.257	0.064	-5.995	0.682973	0.602902	0.773368	424	6107	912	7441	2.03373e-09	8.37898e-08	con_significant	-0.165596	8.69171	1.4545	1.256	1.653	0.101	14.335	0	-0.0495	-0.054	-0.045	0.002	-20.388	0	0.426	0.289	0.563	0.07	6.098	0	0.2896	0.177	0.402	0.057	5.049	0	1.1087	1.002	1.216	0.055	20.341	0	-0.145
Insect bite	injuries & poisonings	-0.3715	-0.948	0.205	0.294	-1.263	0.689699	0.387515	1.22753	18	6513	41	8312	0.206591	0.441995	not_significant	-0.16134	0.684888	1.4335	1.235	1.632	0.101	14.151	0	-0.0498	-0.055	-0.045	0.002	-20.529	0	0.4404	0.304	0.577	0.07	6.31	0	0.2882	0.176	0.4	0.057	5.03	0	1.1243	1.018	1.231	0.054	20.665	0	-0.1545
Insomnia	neurological	0.0186	-0.143	0.18	0.082	0.226	1.01877	0.866754	1.19722	279	6252	437	7916	0.821111	0.92359	not_significant	0.00807788	0.0855979	1.4335	1.235	1.632	0.101	14.147	0	-0.0499	-0.055	-0.045	0.002	-20.514	0	0.4434	0.307	0.58	0.07	6.35	0	0.2901	0.178	0.402	0.057	5.065	0	1.1264	1.02	1.233	0.054	20.688	0	-0.1532
Insulin pump user	endocrine/metabolic	1.0335	0.335	1.732	0.357	2.899	2.81089	1.39794	5.65195	24	6507	14	8339	0.00374859	0.0246741	mi_significant	0.448843	2.42613	1.4356	1.237	1.634	0.101	14.168	0	-0.05	-0.055	-0.045	0.002	-20.618	0	0.4436	0.307	0.58	0.07	6.355	0	0.2912	0.179	0.404	0.057	5.084	0	1.1293	1.023	1.236	0.054	20.75	0	-0.1497
Internal derangement of knee	injuries & poisonings	-0.3427	-0.63	-0.056	0.146	-2.342	0.709851	0.532592	0.945539	73	6458	169	8184	0.0192001	0.0890242	not_significant	-0.148833	1.7167	1.434	1.235	1.633	0.101	14.156	0	-0.0496	-0.054	-0.045	0.002	-20.466	0	0.4366	0.3	0.573	0.07	6.254	0	0.285	0.173	0.397	0.057	4.972	0	1.1203	1.014	1.227	0.054	20.578	0	-0.1552
Intervertebral disc disorder with myelopathy	musculoskeletal	-0.5811	-1.506	0.344	0.472	-1.232	0.559283	0.221795	1.41058	10	6521	20	8333	0.21807	0.452931	not_significant	-0.252369	0.661404	1.4328	1.234	1.631	0.101	14.146	0	-0.0498	-0.055	-0.045	0.002	-20.529	0	0.442	0.305	0.579	0.07	6.336	0	0.2891	0.177	0.401	0.057	5.048	0	1.1238	1.017	1.23	0.054	20.653	0	-0.1545
Intestinal disaccharidase deficiencies and disaccharide malabsorption	endocrine/metabolic	0.0054	-0.168	0.179	0.089	0.061	1.00541	0.845354	1.19602	227	6304	414	7939	0.951319	0.979159	not_significant	0.00234519	0.0216739	1.4333	1.235	1.632	0.101	14.135	0	-0.0498	-0.055	-0.045	0.002	-20.517	0	0.4427	0.306	0.579	0.07	6.346	0	0.2902	0.178	0.402	0.057	5.067	0	1.1258	1.019	1.232	0.054	20.699	0	-0.1538
Intestinal e.coli	infectious diseases	0.2703	-2.524	3.065	1.426	0.19	1.31036	0.0801384	21.4345	10	6521	10	8343	0.84962	0.935231	not_significant	0.11739	0.0707751	1.433	1.234	1.632	0.101	14.146	0	-0.0498	-0.055	-0.045	0.002	-20.553	0	0.4427	0.306	0.579	0.07	6.346	0	0.29	0.178	0.402	0.057	5.063	0	1.1258	1.019	1.232	0.054	20.699	0	-0.1534
Intestinal helminthiases	infectious diseases	0.9726	-0.536	2.481	0.77	1.264	2.64481	0.585084	11.9532	10	6521	10	8343	0.20631	0.441995	not_significant	0.422395	0.68548	1.4338	1.235	1.632	0.101	14.152	0	-0.0499	-0.055	-0.045	0.002	-20.561	0	0.4424	0.306	0.579	0.07	6.341	0	0.2902	0.178	0.402	0.057	5.068	0	1.1263	1.02	1.233	0.054	20.706	0	-0.1538
Intestinal infection	infectious diseases	0.0829	-0.347	0.513	0.219	0.378	1.08643	0.706805	1.67029	37	6494	57	8296	0.705574	0.865168	not_significant	0.036003	0.151458	1.4326	1.234	1.631	0.101	14.141	0	-0.0498	-0.055	-0.045	0.002	-20.555	0	0.4433	0.307	0.58	0.07	6.353	0	0.2903	0.178	0.403	0.057	5.069	0	1.1263	1.02	1.233	0.054	20.702	0	-0.1536
Intestinal infection due to C. difficile	infectious diseases	0.3993	-0.39	1.188	0.403	0.992	1.49078	0.677057	3.28051	15	6516	13	8340	0.321263	0.567721	not_significant	0.173414	0.49314	1.4321	1.234	1.631	0.101	14.136	0	-0.0498	-0.055	-0.045	0.002	-20.55	0	0.4425	0.306	0.579	0.07	6.344	0	0.2895	0.177	0.402	0.057	5.055	0	1.1259	1.019	1.233	0.054	20.701	0	-0.1535
Intestinal infection due to protozoa	infectious diseases	-1.4248	-3.565	0.716	1.092	-1.305	0.240557	0.028297	2.04623	10	6521	10	8343	0.191995	0.42659	not_significant	-0.618783	0.71671	1.434	1.235	1.633	0.101	14.153	0	-0.0498	-0.055	-0.045	0.002	-20.547	0	0.4423	0.306	0.579	0.07	6.34	0	0.2888	0.177	0.401	0.057	5.043	0	1.1249	1.018	1.231	0.054	20.678	0	-0.1544
Intestinal malabsorption (non-celiac)	digestive	0.2146	-0.433	0.862	0.33	0.65	1.23937	0.64856	2.36789	20	6511	20	8333	0.515997	0.742582	not_significant	0.0931996	0.287353	1.4317	1.233	1.63	0.101	14.13	0	-0.0498	-0.055	-0.045	0.002	-20.545	0	0.4432	0.306	0.58	0.07	6.352	0	0.2897	0.177	0.402	0.057	5.059	0	1.126	1.019	1.233	0.054	20.702	0	-0.1533
Intracerebral hemorrhage	circulatory system	1.5132	-0.123	3.149	0.835	1.813	4.54124	0.884264	23.3127	10	6521	10	8343	0.0698055	0.224686	not_significant	0.657174	1.15611	1.4308	1.232	1.629	0.101	14.121	0	-0.0498	-0.055	-0.045	0.002	-20.543	0	0.4423	0.305	0.579	0.07	6.338	0	0.2919	0.18	0.404	0.057	5.095	0	1.127	1.02	1.234	0.054	20.714	0	-0.1524
Intracranial hemorrhage	circulatory system	1.1139	-0.488	2.715	0.817	1.363	3.04622	0.613853	15.1046	10	6521	10	8343	0.172815	0.397447	not_significant	0.483761	0.762418	1.4346	1.236	1.633	0.101	14.157	0	-0.0499	-0.055	-0.045	0.002	-20.57	0	0.4426	0.306	0.579	0.07	6.345	0	0.2905	0.178	0.403	0.057	5.073	0	1.1264	1.02	1.233	0.054	20.706	0	-0.153
Intracranial hemorrhage (injury)	injuries & poisonings	0.1062	-1.036	1.249	0.583	0.182	1.11204	0.354871	3.48685	10	6521	10	8343	0.855379	0.936566	not_significant	0.0461221	0.0678413	1.4327	1.234	1.631	0.101	14.142	0	-0.0498	-0.055	-0.045	0.002	-20.552	0	0.4428	0.306	0.58	0.07	6.347	0	0.2902	0.178	0.402	0.057	5.068	0	1.1259	1.019	1.233	0.054	20.7	0	-0.1533
Iron deficiency anemia secondary to blood loss (chronic)	hematopoietic	1.2248	0.386	2.063	0.428	2.863	3.40349	1.47108	7.86954	19	6512	10	8343	0.00419292	0.0269919	mi_significant	0.531924	2.37748	1.4369	1.238	1.636	0.101	14.177	0	-0.05	-0.055	-0.045	0.002	-20.6	0	0.4429	0.306	0.58	0.07	6.347	0	0.2893	0.177	0.402	0.057	5.05	0	1.1262	1.02	1.233	0.054	20.697	0	-0.1537
Iron deficiency anemias, unspecified or not due to blood loss	hematopoietic	0.7074	0.361	1.054	0.177	4.005	2.02871	1.43476	2.8691	87	6444	62	8291	6.20711e-05	0.000758529	mi_significant	0.30722	4.20711	1.4301	1.232	1.629	0.101	14.112	0	-0.05	-0.055	-0.045	0.002	-20.623	0	0.4461	0.309	0.583	0.07	6.389	0	0.2923	0.18	0.405	0.057	5.101	0	1.1316	1.025	1.238	0.054	20.781	0	-0.1473
Irritable Bowel Syndrome	digestive	0.1595	-0.121	0.44	0.143	1.115	1.17292	0.886034	1.55271	96	6435	121	8232	0.264692	0.5071	not_significant	0.06927	0.57726	1.431	1.232	1.63	0.101	14.123	0	-0.0499	-0.055	-0.045	0.002	-20.558	0	0.4434	0.307	0.58	0.07	6.356	0	0.291	0.179	0.403	0.057	5.081	0	1.127	1.02	1.234	0.054	20.716	0	-0.1538
Jaundice (not of newborn)	digestive	0.1138	-0.298	0.526	0.21	0.541	1.12053	0.742301	1.69215	43	6488	60	8293	0.588205	0.794187	not_significant	0.0494227	0.230471	1.4326	1.234	1.631	0.101	14.142	0	-0.0499	-0.055	-0.045	0.002	-20.56	0	0.4435	0.307	0.58	0.07	6.356	0	0.2903	0.178	0.403	0.057	5.07	0	1.1267	1.02	1.233	0.054	20.706	0	-0.1529
Jaw disease NOS	digestive	-0.8547	-2.455	0.746	0.816	-1.047	0.425411	0.0858632	2.10855	10	6521	10	8343	0.295182	0.535412	not_significant	-0.371191	0.52991	1.4331	1.235	1.632	0.101	14.147	0	-0.0498	-0.055	-0.045	0.002	-20.545	0	0.442	0.305	0.579	0.07	6.336	0	0.2898	0.178	0.402	0.057	5.061	0	1.1254	1.019	1.232	0.054	20.69	0	-0.1534
Joint effusions	musculoskeletal	-0.2583	-0.494	-0.022	0.12	-2.147	0.772363	0.610181	0.97824	112	6419	242	8111	0.0318026	0.134881	not_significant	-0.112178	1.49754	1.4318	1.233	1.63	0.101	14.134	0	-0.0496	-0.054	-0.045	0.002	-20.458	0	0.4391	0.302	0.576	0.07	6.292	0	0.2881	0.176	0.4	0.057	5.03	0	1.1221	1.015	1.229	0.054	20.618	0	-0.1514
Joint/ligament sprain	injuries & poisonings	-0.5275	-0.706	-0.349	0.091	-5.792	0.590078	0.493615	0.705393	193	6338	458	7895	6.93798e-09	2.63278e-07	con_significant	-0.22909	8.15877	1.4353	1.237	1.634	0.101	14.168	0	-0.0494	-0.054	-0.045	0.002	-20.359	0	0.4305	0.294	0.567	0.07	6.165	0	0.2925	0.18	0.405	0.057	5.1	0	1.1244	1.018	1.231	0.054	20.649	0	-0.1472
Juvenile osteochondrosis	musculoskeletal	-0.2708	-1.287	0.745	0.518	-0.522	0.762769	0.276098	2.10644	10	6521	10	8343	0.601347	0.799448	not_significant	-0.117607	0.220875	1.4337	1.235	1.632	0.101	14.151	0	-0.0498	-0.055	-0.045	0.002	-20.555	0	0.4425	0.306	0.579	0.07	6.344	0	0.2901	0.178	0.402	0.057	5.066	0	1.1259	1.019	1.232	0.054	20.7	0	-0.1536
Juvenile rheumatoid arthritis	musculoskeletal	-0.2863	-1.782	1.209	0.763	-0.375	0.751037	0.168301	3.35013	10	6521	10	8343	0.70751	0.866805	not_significant	-0.124339	0.150267	1.4341	1.235	1.633	0.101	14.151	0	-0.0499	-0.055	-0.045	0.002	-20.556	0	0.4424	0.306	0.579	0.07	6.341	0	0.29	0.178	0.402	0.057	5.064	0	1.1257	1.019	1.232	0.054	20.698	0	-0.1536
Keloid scar	dermatologic	0.03	-0.475	0.534	0.257	0.116	1.03045	0.621885	1.70574	30	6501	39	8314	0.907361	0.964476	not_significant	0.0130288	0.0422198	1.4328	1.234	1.631	0.101	14.141	0	-0.0498	-0.055	-0.045	0.002	-20.552	0	0.4428	0.306	0.58	0.07	6.347	0	0.2902	0.178	0.402	0.057	5.068	0	1.1259	1.019	1.232	0.054	20.699	0	-0.1534
Keratitis	sense organs	-0.3179	-1.343	0.707	0.523	-0.608	0.727676	0.261061	2.0279	10	6521	11	8342	0.543235	0.764054	not_significant	-0.138062	0.265012	1.4334	1.235	1.632	0.101	14.15	0	-0.0498	-0.055	-0.045	0.002	-20.55	0	0.4422	0.305	0.579	0.07	6.338	0	0.2895	0.177	0.402	0.057	5.055	0	1.1254	1.019	1.232	0.054	20.69	0	-0.1539
Keratoconjunctivitis	sense organs	0.5291	-1.11	2.169	0.837	0.632	1.6974	0.329559	8.74953	10	6521	10	8343	0.527065	0.752503	not_significant	0.229785	0.278136	1.4327	1.234	1.631	0.101	14.142	0	-0.0499	-0.055	-0.045	0.002	-20.557	0	0.4437	0.307	0.581	0.07	6.359	0	0.2912	0.179	0.404	0.057	5.083	0	1.1267	1.02	1.233	0.054	20.708	0	-0.1524
Keratoconjunctivitis sicca	sense organs	-0.6395	-1.957	0.678	0.672	-0.951	0.527556	0.141282	1.96993	10	6521	12	8341	0.341358	0.591385	not_significant	-0.277731	0.46679	1.4293	1.231	1.628	0.101	14.097	0	-0.0497	-0.054	-0.045	0.002	-20.488	0	0.447	0.31	0.584	0.07	6.395	0	0.2899	0.178	0.402	0.057	5.063	0	1.1254	1.019	1.232	0.054	20.692	0	-0.1537
Keratoconus	sense organs	-0.4212	-1.349	0.507	0.474	-0.889	0.656259	0.2595	1.6603	10	6521	16	8337	0.373774	0.627453	not_significant	-0.182925	0.427391	1.4322	1.234	1.631	0.101	14.138	0	-0.0498	-0.055	-0.045	0.002	-20.534	0	0.4426	0.306	0.579	0.07	6.344	0	0.2899	0.178	0.402	0.057	5.063	0	1.1257	1.019	1.232	0.054	20.696	0	-0.1536
Keratoderma, acquired	dermatologic	-0.1919	-0.854	0.471	0.338	-0.568	0.825389	0.425709	1.60159	13	6518	34	8319	0.570242	0.781487	not_significant	-0.0833411	0.243941	1.432	1.233	1.631	0.101	14.133	0	-0.0498	-0.055	-0.045	0.002	-20.521	0	0.442	0.305	0.579	0.07	6.336	0	0.2898	0.178	0.402	0.057	5.061	0	1.1251	1.018	1.232	0.054	20.68	0	-0.1534
Kidney replaced by transpant	genitourinary	1.8506	1.135	2.566	0.365	5.07	6.36364	3.11117	13.0137	44	6487	10	8343	3.9839e-07	9.41769e-06	mi_significant	0.803705	6.39969	1.4376	1.239	1.636	0.101	14.171	0	-0.0501	-0.055	-0.045	0.002	-20.637	0	0.4426	0.306	0.58	0.07	6.335	0	0.2897	0.177	0.402	0.057	5.054	0	1.1272	1.02	1.234	0.054	20.701	0	-0.1507
Kyphoscoliosis and scoliosis	musculoskeletal	-0.0106	-0.499	0.478	0.249	-0.042	0.989456	0.607137	1.61285	32	6499	42	8311	0.966124	0.986651	not_significant	-0.00460352	0.0149669	1.4331	1.234	1.632	0.101	14.143	0	-0.0498	-0.055	-0.045	0.002	-20.552	0	0.4427	0.306	0.579	0.07	6.346	0	0.2902	0.178	0.402	0.057	5.067	0	1.1258	1.019	1.232	0.054	20.698	0	-0.1534
Kyphosis (acquired)	musculoskeletal	0.3867	-0.521	1.294	0.463	0.835	1.47211	0.593926	3.64735	11	6520	11	8342	0.403619	0.656165	not_significant	0.167942	0.394028	1.4342	1.236	1.633	0.101	14.157	0	-0.0499	-0.055	-0.045	0.002	-20.568	0	0.4429	0.306	0.58	0.07	6.349	0	0.2902	0.178	0.402	0.057	5.068	0	1.1255	1.019	1.232	0.054	20.693	0	-0.1533
Labyrinthitis	sense organs	-0.7448	-2.011	0.521	0.646	-1.153	0.474829	0.133855	1.68371	10	6521	14	8339	0.248872	0.490141	not_significant	-0.323463	0.604024	1.4306	1.232	1.629	0.101	14.117	0	-0.0497	-0.054	-0.045	0.002	-20.495	0	0.4413	0.305	0.578	0.07	6.325	0	0.2896	0.177	0.402	0.057	5.056	0	1.1242	1.018	1.231	0.054	20.664	0	-0.1548
Lack of coordination	neurological	0.7502	-0.021	1.522	0.394	1.906	2.11742	0.979219	4.58138	17	6514	12	8341	0.0566346	0.197741	not_significant	0.325808	1.24692	1.4364	1.238	1.635	0.101	14.173	0	-0.0499	-0.055	-0.045	0.002	-20.583	0	0.44	0.303	0.577	0.07	6.306	0	0.2888	0.177	0.401	0.057	5.043	0	1.1256	1.019	1.232	0.054	20.692	0	-0.154
Lack of normal physiological development, unspecified	endocrine/metabolic	-1.0579	-3.461	1.345	1.226	-0.863	0.347184	0.0313983	3.83819	10	6521	10	8343	0.388164	0.643828	not_significant	-0.45944	0.410985	1.4356	1.237	1.634	0.101	14.164	0	-0.0499	-0.055	-0.045	0.002	-20.567	0	0.4428	0.306	0.58	0.07	6.347	0	0.2911	0.179	0.403	0.057	5.082	0	1.126	1.019	1.233	0.054	20.701	0	-0.153
Lagophthalmos	sense organs	1.7932	-0.468	4.055	1.154	1.554	6.00865	0.626254	57.6852	10	6521	10	8343	0.120158	0.317923	not_significant	0.778777	0.920247	1.4346	1.236	1.633	0.101	14.158	0	-0.0499	-0.055	-0.045	0.002	-20.57	0	0.4422	0.305	0.579	0.07	6.338	0	0.2909	0.179	0.403	0.057	5.08	0	1.1258	1.019	1.232	0.054	20.697	0	-0.153
Large cell lymphoma	neoplasms	0.4379	-1.298	2.174	0.886	0.494	1.54945	0.273077	8.79339	10	6521	10	8343	0.621093	0.813457	not_significant	0.190178	0.206844	1.4325	1.234	1.631	0.101	14.141	0	-0.0498	-0.055	-0.045	0.002	-20.547	0	0.4424	0.306	0.579	0.07	6.341	0	0.29	0.178	0.402	0.057	5.064	0	1.1254	1.019	1.232	0.054	20.69	0	-0.1535
Late effect		-0.5515	-2.395	1.292	0.941	-0.586	0.576085	0.0911727	3.64006	10	6521	10	8343	0.557771	0.772628	not_significant	-0.239513	0.253544	1.4332	1.235	1.632	0.101	14.148	0	-0.0498	-0.055	-0.045	0.002	-20.553	0	0.4425	0.306	0.579	0.07	6.343	0	0.29	0.178	0.402	0.057	5.064	0	1.1262	1.02	1.233	0.054	20.704	0	-0.1535
Late effects of cerebrovascular disease	circulatory system	1.9209	0.508	3.334	0.721	2.664	6.8271	1.66196	28.0503	10	6521	10	8343	0.00771262	0.0433184	mi_significant	0.834236	2.1128	1.4451	1.246	1.644	0.101	14.243	0	-0.0502	-0.055	-0.045	0.002	-20.654	0	0.4416	0.305	0.578	0.07	6.328	0	0.2896	0.177	0.402	0.057	5.056	0	1.1272	1.021	1.234	0.054	20.718	0	-0.1523
Laxity of ligament or hypermobility syndrome	musculoskeletal	-0.3641	-1.29	0.562	0.473	-0.77	0.694822	0.275271	1.75418	10	6521	16	8337	0.441109	0.685468	not_significant	-0.158127	0.355454	1.4338	1.235	1.632	0.101	14.152	0	-0.0498	-0.055	-0.045	0.002	-20.541	0	0.441	0.304	0.578	0.07	6.319	0	0.2889	0.177	0.401	0.057	5.042	0	1.1245	1.018	1.231	0.054	20.664	0	-0.1549
Learning disorder	mental disorders	-0.4445	-2.274	1.385	0.933	-0.476	0.641145	0.1029	3.99483	10	6521	10	8343	0.633916	0.822038	not_significant	-0.193044	0.197969	1.4344	1.236	1.633	0.101	14.153	0	-0.0499	-0.055	-0.045	0.002	-20.557	0	0.4426	0.306	0.579	0.07	6.345	0	0.2899	0.178	0.402	0.057	5.062	0	1.1254	1.019	1.232	0.054	20.688	0	-0.1538
Left bundle branch block	circulatory system	0.1434	-0.926	1.213	0.546	0.263	1.15419	0.396135	3.36356	10	6521	12	8341	0.792729	0.912874	not_significant	0.0622778	0.100875	1.4339	1.235	1.633	0.101	14.146	0	-0.0499	-0.055	-0.045	0.002	-20.542	0	0.4428	0.306	0.58	0.07	6.348	0	0.2903	0.178	0.403	0.057	5.07	0	1.126	1.019	1.233	0.054	20.701	0	-0.1533
Leukemia	neoplasms	1.2049	0.402	2.008	0.41	2.941	3.33643	1.49481	7.44841	27	6504	10	8343	0.00327251	0.0226873	mi_significant	0.523281	2.48512	1.4285	1.23	1.627	0.101	14.101	0	-0.0497	-0.054	-0.045	0.002	-20.509	0	0.4408	0.304	0.577	0.07	6.318	0	0.2876	0.175	0.4	0.057	5.021	0	1.1229	1.016	1.23	0.054	20.641	0	-0.1562
Leukoplakia of oral mucosa	digestive	1.0768	-0.558	2.712	0.834	1.291	2.93527	0.572353	15.0594	10	6521	10	8343	0.196727	0.430472	not_significant	0.467648	0.706135	1.4354	1.237	1.634	0.101	14.165	0	-0.0499	-0.055	-0.045	0.002	-20.576	0	0.4435	0.307	0.58	0.07	6.358	0	0.2906	0.178	0.403	0.057	5.075	0	1.1267	1.02	1.233	0.054	20.713	0	-0.1532
Lipoma	neoplasms	0.2814	0.03	0.533	0.129	2.19	1.32498	1.03045	1.70404	122	6409	147	8206	0.0285347	0.123565	not_significant	0.12221	1.54463	1.4281	1.23	1.627	0.101	14.096	0	-0.0499	-0.055	-0.045	0.002	-20.57	0	0.4475	0.311	0.584	0.07	6.411	0	0.2926	0.18	0.405	0.057	5.108	0	1.1295	1.023	1.236	0.054	20.754	0	-0.1549
Lipoma of skin and subcutaneous tissue	neoplasms	-0.5072	-0.874	-0.14	0.187	-2.71	0.602179	0.417279	0.869358	43	6488	111	8242	0.00673474	0.039002	con_significant	-0.220274	2.17168	1.432	1.233	1.631	0.101	14.135	0	-0.0497	-0.054	-0.045	0.002	-20.485	0	0.4391	0.302	0.576	0.07	6.293	0	0.289	0.177	0.401	0.057	5.046	0	1.1244	1.018	1.231	0.054	20.667	0	-0.1519
Lipoprotein disorders	endocrine/metabolic	0.0167	-0.368	0.402	0.196	0.085	1.01684	0.692117	1.49481	46	6485	70	8283	0.932176	0.972759	not_significant	0.00725272	0.0305019	1.4328	1.234	1.631	0.101	14.142	0	-0.0498	-0.055	-0.045	0.002	-20.552	0	0.4429	0.306	0.58	0.07	6.346	0	0.2904	0.178	0.403	0.057	5.068	0	1.126	1.019	1.233	0.054	20.691	0	-0.1533
Liver abscess and sequelae of chronic liver disease	digestive	0.797	-0.193	1.787	0.505	1.577	2.21887	0.824482	5.97151	11	6520	10	8343	0.114687	0.307967	not_significant	0.346133	0.940487	1.4333	1.235	1.632	0.101	14.147	0	-0.0499	-0.055	-0.045	0.002	-20.559	0	0.4428	0.306	0.58	0.07	6.346	0	0.2893	0.177	0.402	0.057	5.051	0	1.1257	1.019	1.232	0.054	20.694	0	-0.1537
Liver replaced by transplant	digestive	0.874	-0.422	2.17	0.661	1.322	2.39648	0.655734	8.75828	10	6521	10	8343	0.186317	0.418489	not_significant	0.379573	0.729747	1.4325	1.234	1.631	0.101	14.14	0	-0.0498	-0.055	-0.045	0.002	-20.549	0	0.4424	0.306	0.579	0.07	6.342	0	0.2895	0.177	0.402	0.057	5.055	0	1.1258	1.019	1.232	0.054	20.697	0	-0.1537
Localized superficial swelling, mass, or lump	dermatologic	-0.1906	-0.418	0.037	0.116	-1.643	0.826463	0.658362	1.03769	127	6404	234	8119	0.100408	0.286448	not_significant	-0.0827765	0.99823	1.4348	1.236	1.633	0.101	14.164	0	-0.0497	-0.054	-0.045	0.002	-20.497	0	0.4385	0.302	0.575	0.07	6.282	0	0.2867	0.174	0.399	0.057	5.003	0	1.1226	1.016	1.229	0.054	20.625	0	-0.1545
Loose body in joint	musculoskeletal	0.0197	-1.202	1.241	0.623	0.032	1.0199	0.300592	3.45907	10	6521	10	8343	0.974772	0.987936	not_significant	0.0085556	0.0110971	1.433	1.234	1.632	0.101	14.145	0	-0.0498	-0.055	-0.045	0.002	-20.55	0	0.4427	0.306	0.579	0.07	6.346	0	0.2902	0.178	0.402	0.057	5.067	0	1.1258	1.019	1.232	0.054	20.699	0	-0.1534
Lordosis (acquired)	musculoskeletal	0.2385	-1.811	2.288	1.046	0.228	1.26934	0.163491	9.85521	10	6521	10	8343	0.819574	0.923301	not_significant	0.103579	0.086412	1.4331	1.235	1.632	0.101	14.146	0	-0.0498	-0.055	-0.045	0.002	-20.553	0	0.4424	0.306	0.579	0.07	6.341	0	0.2903	0.178	0.403	0.057	5.069	0	1.1258	1.019	1.232	0.054	20.7	0	-0.1533
Loss of height	symptoms	0.806	-0.522	2.134	0.677	1.19	2.23893	0.593333	8.44859	10	6521	10	8343	0.234108	0.472144	not_significant	0.350041	0.630584	1.4348	1.236	1.633	0.101	14.16	0	-0.0499	-0.055	-0.045	0.002	-20.569	0	0.4434	0.307	0.58	0.07	6.355	0	0.2902	0.178	0.402	0.057	5.067	0	1.126	1.019	1.233	0.054	20.703	0	-0.1532
Loss of teeth or edentulism	digestive	-0.5286	-1.844	0.787	0.671	-0.787	0.58943	0.158183	2.1968	10	6521	10	8343	0.431151	0.678733	not_significant	-0.229568	0.365371	1.4329	1.234	1.631	0.101	14.144	0	-0.0498	-0.055	-0.045	0.002	-20.55	0	0.4438	0.307	0.581	0.07	6.361	0	0.291	0.179	0.403	0.057	5.08	0	1.1263	1.02	1.233	0.054	20.706	0	-0.1533
Lumbosacral spondylolysis, congenital		-0.2499	-3.463	2.963	1.639	-0.152	0.778879	0.0313356	19.356	10	6521	10	8343	0.878831	0.948559	not_significant	-0.10853	0.0560946	1.4331	1.235	1.632	0.101	14.147	0	-0.0498	-0.055	-0.045	0.002	-20.553	0	0.4427	0.306	0.579	0.07	6.346	0	0.2902	0.178	0.402	0.057	5.068	0	1.1259	1.019	1.233	0.054	20.7	0	-0.1533
Lump or mass in breast	genitourinary	-0.0014	-0.653	0.65	0.332	-0.004	0.998601	0.520482	1.91554	17	6514	24	8329	0.996626	0.997318	not_significant	-0.000608012	0.00146775	1.433	1.234	1.632	0.101	14.144	0	-0.0498	-0.055	-0.045	0.002	-20.552	0	0.4427	0.306	0.579	0.07	6.346	0	0.2902	0.178	0.402	0.057	5.067	0	1.1258	1.019	1.232	0.054	20.699	0	-0.1534
Lung disease due to external agents	respiratory	1.4857	0.412	2.559	0.548	2.713	4.41806	1.50983	12.9229	16	6515	10	8343	0.00666856	0.0387744	mi_significant	0.645231	2.17597	1.4331	1.234	1.632	0.101	14.14	0	-0.0499	-0.055	-0.045	0.002	-20.554	0	0.4439	0.307	0.581	0.07	6.362	0	0.288	0.176	0.4	0.057	5.027	0	1.1252	1.019	1.232	0.054	20.683	0	-0.1541
Lyme disease	infectious diseases	-1.3553	-3.509	0.798	1.099	-1.233	0.25787	0.0299268	2.22109	10	6521	10	8343	0.217453	0.452931	not_significant	-0.588599	0.662635	1.4322	1.234	1.631	0.101	14.138	0	-0.0498	-0.055	-0.045	0.002	-20.529	0	0.4414	0.305	0.578	0.07	6.327	0	0.2893	0.177	0.402	0.057	5.052	0	1.1249	1.018	1.231	0.054	20.678	0	-0.1545
Lymphadenitis	hematopoietic	0.4155	0.168	0.663	0.126	3.287	1.51513	1.18294	1.94061	138	6393	140	8213	0.00101127	0.0084292	mi_significant	0.180449	2.99513	1.4277	1.229	1.626	0.101	14.09	0	-0.05	-0.055	-0.045	0.002	-20.602	0	0.4469	0.31	0.584	0.07	6.402	0	0.2925	0.18	0.405	0.057	5.105	0	1.1323	1.026	1.239	0.054	20.792	0	-0.1517
Lymphoid leukemia	neoplasms	1.3942	-0.289	3.077	0.859	1.624	4.03175	0.749012	21.6932	10	6521	10	8343	0.104461	0.293058	not_significant	0.605493	0.981048	1.4297	1.231	1.628	0.101	14.111	0	-0.0498	-0.055	-0.045	0.002	-20.522	0	0.4431	0.306	0.58	0.07	6.352	0	0.2901	0.178	0.402	0.057	5.067	0	1.1259	1.019	1.232	0.054	20.701	0	-0.1545
Lymphoid leukemia, acute	neoplasms	2.9927	0.973	5.012	1.03	2.905	19.9394	2.64587	150.205	23	6508	10	8343	0.00367581	0.0244359	mi_significant	1.29971	2.43465	1.421	1.222	1.62	0.101	14.013	0	-0.0495	-0.054	-0.045	0.002	-20.4	0	0.4423	0.306	0.579	0.07	6.342	0	0.2866	0.174	0.399	0.057	5.003	0	1.1212	1.015	1.228	0.054	20.611	0	-0.1577
Lymphoid leukemia, chronic	neoplasms	3.0959	0.975	5.217	1.082	2.861	22.1071	2.65117	184.38	11	6520	10	8343	0.00422887	0.0271024	mi_significant	1.34453	2.37378	1.4483	1.249	1.647	0.102	14.268	0	-0.0502	-0.055	-0.045	0.002	-20.666	0	0.4432	0.306	0.58	0.07	6.351	0	0.2888	0.177	0.401	0.057	5.042	0	1.123	1.016	1.23	0.054	20.639	0	-0.1546
Macular degeneration (senile) of retina NOS	sense organs	0.7113	-0.868	2.29	0.806	0.883	2.03664	0.41979	9.87494	10	6521	10	8343	0.37726	0.630369	not_significant	0.308914	0.423359	1.4369	1.238	1.636	0.101	14.17	0	-0.0499	-0.055	-0.045	0.002	-20.568	0	0.4419	0.305	0.579	0.07	6.334	0	0.2906	0.178	0.403	0.057	5.073	0	1.1259	1.019	1.232	0.054	20.699	0	-0.153
Macular degeneration, dry	sense organs	1.1523	-0.349	2.653	0.766	1.505	3.16547	0.705393	14.1966	10	6521	10	8343	0.132379	0.335484	not_significant	0.500438	0.878181	1.4426	1.244	1.642	0.102	14.211	0	-0.0501	-0.055	-0.045	0.002	-20.604	0	0.4397	0.303	0.576	0.07	6.3	0	0.2899	0.178	0.402	0.057	5.062	0	1.1263	1.02	1.233	0.054	20.705	0	-0.1533
Macular degeneration, wet	sense organs	2.1249	-0.402	4.651	1.289	1.648	8.37206	0.668981	104.69	10	6521	10	8343	0.0992619	0.285517	not_significant	0.922832	1.00322	1.4399	1.241	1.639	0.101	14.202	0	-0.05	-0.055	-0.045	0.002	-20.605	0	0.4401	0.303	0.577	0.07	6.308	0	0.2896	0.177	0.402	0.057	5.056	0	1.1262	1.02	1.233	0.054	20.703	0	-0.1531
Macular puckering of retina	sense organs	0.3049	-1.125	1.735	0.729	0.418	1.35649	0.324652	5.66893	10	6521	10	8343	0.675937	0.851268	not_significant	0.132416	0.170093	1.4346	1.236	1.633	0.101	14.151	0	-0.0499	-0.055	-0.045	0.002	-20.552	0	0.4417	0.305	0.579	0.07	6.329	0	0.2901	0.178	0.402	0.057	5.066	0	1.1259	1.019	1.233	0.054	20.7	0	-0.1535
Major depressive disorder	mental disorders	-0.1145	-0.297	0.068	0.093	-1.228	0.891812	0.743044	1.07037	205	6326	356	7997	0.219338	0.453782	not_significant	-0.0497267	0.658885	1.4342	1.236	1.633	0.101	14.156	0	-0.0498	-0.055	-0.045	0.002	-20.516	0	0.4415	0.305	0.578	0.07	6.328	0	0.2911	0.179	0.403	0.057	5.082	0	1.1238	1.017	1.23	0.054	20.653	0	-0.1519
Malaise and fatigue	symptoms	0.0739	-0.059	0.207	0.068	1.088	1.0767	0.942707	1.22998	425	6106	640	7713	0.276562	0.517254	not_significant	0.0320944	0.558207	1.4309	1.232	1.629	0.101	14.123	0	-0.05	-0.055	-0.045	0.002	-20.579	0	0.4478	0.311	0.585	0.07	6.404	0	0.2916	0.179	0.404	0.057	5.09	0	1.1309	1.024	1.238	0.055	20.713	0	-0.1523
Malignant neoplasm of bladder	neoplasms	0.2541	-0.701	1.209	0.487	0.522	1.2893	0.496089	3.35013	10	6521	11	8342	0.601877	0.799448	not_significant	0.110354	0.220492	1.4349	1.236	1.634	0.101	14.155	0	-0.0499	-0.055	-0.045	0.002	-20.556	0	0.4426	0.306	0.579	0.07	6.345	0	0.29	0.178	0.402	0.057	5.064	0	1.1256	1.019	1.232	0.054	20.694	0	-0.1532
Malignant neoplasm of female breast	neoplasms	0.7255	-1.249	2.7	1.008	0.72	2.06576	0.286791	14.8797	10	6521	10	8343	0.471498	0.706023	not_significant	0.315081	0.32652	1.4329	1.234	1.631	0.101	14.144	0	-0.0498	-0.055	-0.045	0.002	-20.554	0	0.443	0.306	0.58	0.07	6.35	0	0.2905	0.178	0.403	0.057	5.073	0	1.1261	1.02	1.233	0.054	20.704	0	-0.1536
Malignant neoplasm of head, face, and neck	neoplasms	2.7939	0.637	4.951	1.101	2.538	16.3446	1.8908	141.316	10	6521	10	8343	0.0111368	0.057767	not_significant	1.21338	1.95324	1.4418	1.243	1.641	0.101	14.218	0	-0.0501	-0.055	-0.045	0.002	-20.629	0	0.442	0.305	0.579	0.07	6.335	0	0.2914	0.179	0.404	0.057	5.087	0	1.1259	1.019	1.233	0.054	20.694	0	-0.1536
Malignant neoplasm of kidney, except pelvis	neoplasms	0.4912	-0.277	1.259	0.392	1.253	1.63428	0.758054	3.5219	14	6517	15	8338	0.210093	0.44532	not_significant	0.213325	0.677587	1.4351	1.237	1.634	0.101	14.165	0	-0.0499	-0.055	-0.045	0.002	-20.574	0	0.4415	0.305	0.578	0.07	6.328	0	0.2894	0.177	0.402	0.057	5.053	0	1.1256	1.019	1.232	0.054	20.694	0	-0.1545
Malignant neoplasm of liver, primary	neoplasms	1.6327	0.458	2.808	0.599	2.724	5.11767	1.58091	16.5767	13	6518	10	8343	0.00645629	0.0376922	mi_significant	0.709073	2.19002	1.4337	1.235	1.632	0.101	14.148	0	-0.0499	-0.055	-0.045	0.002	-20.559	0	0.4423	0.306	0.579	0.07	6.339	0	0.2909	0.179	0.403	0.057	5.079	0	1.1247	1.018	1.231	0.054	20.675	0	-0.1561
Malignant neoplasm of other and ill-defined sites within the digestive organs and peritoneum	neoplasms	1.8707	0.089	3.652	0.909	2.058	6.49284	1.09308	38.5517	10	6521	10	8343	0.0395762	0.153824	not_significant	0.812435	1.40257	1.4353	1.237	1.634	0.101	14.167	0	-0.0499	-0.055	-0.045	0.002	-20.588	0	0.4441	0.307	0.581	0.07	6.365	0	0.2916	0.179	0.404	0.057	5.09	0	1.1268	1.02	1.233	0.054	20.713	0	-0.1534
Malignant neoplasm of rectum, rectosigmoid junction, and anus	neoplasms	0.7914	0.077	1.506	0.365	2.17	2.20648	1.08004	4.50866	21	6510	15	8338	0.0300081	0.128785	not_significant	0.343701	1.52276	1.4402	1.242	1.639	0.101	14.209	0	-0.05	-0.055	-0.045	0.002	-20.619	0	0.4432	0.306	0.58	0.07	6.352	0	0.2858	0.174	0.398	0.057	4.987	0	1.1241	1.018	1.231	0.054	20.665	0	-0.1542
Malignant neoplasm of renal pelvis	neoplasms	0.238	-2.28	2.756	1.285	0.185	1.26871	0.102284	15.7368	10	6521	10	8343	0.853039	0.936253	not_significant	0.103362	0.0690312	1.4333	1.235	1.632	0.101	14.147	0	-0.0498	-0.055	-0.045	0.002	-20.553	0	0.4425	0.306	0.579	0.07	6.343	0	0.2902	0.178	0.402	0.057	5.067	0	1.1258	1.019	1.232	0.054	20.699	0	-0.1534
Malignant neoplasm of retroperitoneum and peritoneum	neoplasms	-0.1443	-1.48	1.191	0.681	-0.212	0.865628	0.227638	3.29037	10	6521	10	8343	0.832251	0.927863	not_significant	-0.0626687	0.0797456	1.4324	1.234	1.631	0.101	14.133	0	-0.0498	-0.055	-0.045	0.002	-20.535	0	0.4427	0.306	0.579	0.07	6.346	0	0.2905	0.178	0.403	0.057	5.071	0	1.126	1.019	1.233	0.054	20.7	0	-0.1534
Malignant neoplasm of testis	neoplasms	1.5054	1.092	1.919	0.211	7.141	4.50596	2.98023	6.81414	130	6401	30	8323	9.28003e-13	7.04305e-11	mi_significant	0.653787	12.0325	1.3898	1.191	1.589	0.102	13.69	0	-0.0489	-0.054	-0.044	0.002	-20.118	0	0.4369	0.3	0.574	0.07	6.256	0	0.2861	0.174	0.399	0.057	4.991	0	1.1115	1.005	1.218	0.054	20.401	0	-0.1674
Malignant neoplasm, other	neoplasms	1.0998	0.633	1.566	0.238	4.621	3.00357	1.88325	4.78746	75	6456	29	8324	3.81619e-06	6.71091e-05	mi_significant	0.477637	5.41837	1.4333	1.235	1.632	0.101	14.139	0	-0.0499	-0.055	-0.045	0.002	-20.578	0	0.4418	0.305	0.579	0.07	6.331	0	0.2849	0.173	0.397	0.057	4.971	0	1.1193	1.013	1.226	0.054	20.558	0	-0.1544
Malunion and nonunion of fracture	musculoskeletal	-0.2075	-0.921	0.506	0.364	-0.57	0.812613	0.398121	1.65864	13	6518	22	8331	0.568901	0.781291	not_significant	-0.0901161	0.244963	1.4322	1.234	1.631	0.101	14.138	0	-0.0498	-0.055	-0.045	0.002	-20.54	0	0.4426	0.306	0.579	0.07	6.344	0	0.2907	0.178	0.403	0.057	5.076	0	1.1261	1.02	1.233	0.054	20.703	0	-0.1533
Manlignant and unknown neoplasms of brain and nervous system	neoplasms	1.1459	0.404	1.888	0.379	3.025	3.14527	1.4978	6.60614	28	6503	11	8342	0.00248315	0.0180844	mi_significant	0.497658	2.605	1.4364	1.238	1.635	0.101	14.171	0	-0.0499	-0.055	-0.045	0.002	-20.583	0	0.4383	0.301	0.575	0.07	6.28	0	0.2886	0.176	0.401	0.057	5.038	0	1.1231	1.016	1.23	0.054	20.642	0	-0.1546
Mastodynia	genitourinary	-0.6203	-1.655	0.415	0.528	-1.175	0.537783	0.191092	1.51437	10	6521	12	8341	0.240074	0.478159	not_significant	-0.269393	0.619654	1.4348	1.236	1.633	0.101	14.161	0	-0.0499	-0.055	-0.045	0.002	-20.563	0	0.4426	0.306	0.579	0.07	6.345	0	0.2901	0.178	0.402	0.057	5.066	0	1.1262	1.02	1.233	0.054	20.705	0	-0.1531
Mastoiditis & related conditions	sense organs	0.2239	-1.114	1.561	0.682	0.328	1.25095	0.328243	4.76358	10	6521	10	8343	0.742848	0.88969	not_significant	0.0972385	0.1291	1.4329	1.234	1.631	0.101	14.145	0	-0.0498	-0.055	-0.045	0.002	-20.553	0	0.4424	0.306	0.579	0.07	6.34	0	0.2903	0.178	0.403	0.057	5.069	0	1.126	1.019	1.233	0.054	20.701	0	-0.1533
Mechanical complication of unspecified genitourinary device, implant, and graft	injuries & poisonings	0.7872	-0.089	1.664	0.447	1.76	2.19724	0.914846	5.28039	13	6518	11	8342	0.0783855	0.243987	not_significant	0.341877	1.10576	1.4379	1.239	1.637	0.101	14.189	0	-0.05	-0.055	-0.045	0.002	-20.603	0	0.4416	0.305	0.578	0.07	6.329	0	0.2891	0.177	0.401	0.057	5.048	0	1.1264	1.02	1.233	0.054	20.707	0	-0.1527
Melanomas of skin	neoplasms	-0.3951	-1.003	0.213	0.31	-1.274	0.673613	0.366777	1.23738	17	6514	38	8315	0.202586	0.437316	not_significant	-0.17159	0.69339	1.4293	1.231	1.628	0.101	14.103	0	-0.0497	-0.054	-0.045	0.002	-20.482	0	0.4438	0.307	0.581	0.07	6.36	0	0.2902	0.178	0.402	0.057	5.068	0	1.1259	1.019	1.233	0.054	20.7	0	-0.1541
Melanomas of skin, dx or hx	neoplasms	-0.3133	-0.658	0.031	0.176	-1.782	0.731031	0.517886	1.03149	51	6480	124	8229	0.0746763	0.234604	not_significant	-0.136064	1.12682	1.4193	1.22	1.618	0.102	13.969	0	-0.0494	-0.054	-0.045	0.002	-20.298	0	0.4432	0.306	0.58	0.07	6.352	0	0.2918	0.18	0.404	0.057	5.094	0	1.1268	1.02	1.233	0.054	20.715	0	-0.1522
Memory loss	mental disorders	-0.0293	-0.47	0.411	0.225	-0.13	0.971125	0.625002	1.50833	34	6497	62	8291	0.89632	0.958823	not_significant	-0.0127248	0.0475368	1.4327	1.234	1.631	0.101	14.14	0	-0.0498	-0.055	-0.045	0.002	-20.528	0	0.4426	0.306	0.579	0.07	6.343	0	0.2901	0.178	0.402	0.057	5.065	0	1.1257	1.019	1.232	0.054	20.694	0	-0.1534
Meniere's disease	sense organs	0.0526	-1.177	1.283	0.628	0.084	1.05401	0.308202	3.60745	10	6521	10	8343	0.933204	0.973016	not_significant	0.0228439	0.0300232	1.4332	1.235	1.632	0.101	14.144	0	-0.0498	-0.055	-0.045	0.002	-20.546	0	0.4428	0.306	0.58	0.07	6.347	0	0.2902	0.178	0.402	0.057	5.068	0	1.1259	1.019	1.232	0.054	20.699	0	-0.1534
Meningitis	neurological	-0.6204	-1.714	0.473	0.558	-1.112	0.537729	0.180144	1.6048	10	6521	11	8342	0.266097	0.508902	not_significant	-0.269436	0.574959	1.4326	1.234	1.631	0.101	14.142	0	-0.0498	-0.055	-0.045	0.002	-20.541	0	0.4433	0.307	0.58	0.07	6.354	0	0.29	0.178	0.402	0.057	5.064	0	1.1261	1.02	1.233	0.054	20.703	0	-0.1537
Methicillin resistant Staphylococcus aureus	infectious diseases	0.4923	-0.206	1.19	0.356	1.382	1.63607	0.813833	3.28708	18	6513	17	8336	0.166938	0.386923	not_significant	0.213803	0.777446	1.4327	1.234	1.631	0.101	14.143	0	-0.0499	-0.055	-0.045	0.002	-20.561	0	0.4423	0.306	0.579	0.07	6.34	0	0.2898	0.178	0.402	0.057	5.059	0	1.1264	1.02	1.233	0.054	20.709	0	-0.1536
Methicillin sensitive Staphylococcus aureus	infectious diseases	1.834	0.65	3.018	0.604	3.036	6.25887	1.91554	20.4504	15	6516	10	8343	0.00239473	0.0177091	mi_significant	0.796496	2.62074	1.4354	1.237	1.634	0.101	14.161	0	-0.0499	-0.055	-0.045	0.002	-20.582	0	0.4439	0.307	0.581	0.07	6.361	0	0.2897	0.177	0.402	0.057	5.057	0	1.1267	1.02	1.233	0.054	20.706	0	-0.1534
Microscopic hematuria	genitourinary	-0.1846	-0.541	0.172	0.182	-1.016	0.831437	0.582166	1.18768	49	6482	105	8248	0.309843	0.555023	not_significant	-0.0801708	0.508859	1.4309	1.232	1.629	0.101	14.123	0	-0.0497	-0.054	-0.045	0.002	-20.494	0	0.4416	0.305	0.578	0.07	6.33	0	0.2894	0.177	0.402	0.057	5.053	0	1.1247	1.018	1.231	0.054	20.675	0	-0.1527
Migrain with aura	neurological	-0.6571	-1.099	-0.215	0.226	-2.911	0.518352	0.333204	0.806541	28	6503	82	8271	0.00360096	0.0241516	con_significant	-0.285375	2.44358	1.4343	1.236	1.633	0.101	14.155	0	-0.0497	-0.054	-0.045	0.002	-20.501	0	0.4391	0.302	0.576	0.07	6.293	0	0.2891	0.177	0.401	0.057	5.046	0	1.1229	1.016	1.23	0.054	20.637	0	-0.1541
Migraine	neurological	-0.3826	-0.61	-0.155	0.116	-3.293	0.682086	0.543351	0.856415	121	6410	250	8103	0.000992203	0.00831836	con_significant	-0.166161	3.0034	1.4414	1.243	1.64	0.101	14.22	0	-0.0498	-0.055	-0.045	0.002	-20.52	0	0.4402	0.303	0.577	0.07	6.307	0	0.2887	0.176	0.401	0.057	5.038	0	1.121	1.014	1.228	0.054	20.598	0	-0.154
Mild cognitive impairment	mental disorders	1.4376	0.06	2.816	0.703	2.045	4.21058	1.06184	16.7099	10	6521	10	8343	0.0408929	0.155999	not_significant	0.624342	1.38835	1.4391	1.241	1.638	0.101	14.205	0	-0.05	-0.055	-0.045	0.002	-20.62	0	0.4381	0.301	0.575	0.07	6.276	0	0.2903	0.178	0.403	0.057	5.068	0	1.1263	1.02	1.233	0.054	20.705	0	-0.1531
Mineral deficiency NEC	endocrine/metabolic	0.6854	0.033	1.338	0.333	2.058	1.98457	1.03355	3.81141	25	6506	17	8336	0.0395721	0.153824	not_significant	0.297665	1.40261	1.4331	1.235	1.632	0.101	14.145	0	-0.0499	-0.055	-0.045	0.002	-20.571	0	0.4425	0.306	0.579	0.07	6.342	0	0.2903	0.178	0.403	0.057	5.069	0	1.1263	1.02	1.233	0.054	20.703	0	-0.1526
Miscarriage; stillbirth	pregnancy complications	1.2064	-0.127	2.54	0.68	1.773	3.34143	0.880734	12.6797	10	6521	10	8343	0.076252	0.237999	not_significant	0.523933	1.11775	1.4291	1.231	1.628	0.101	14.105	0	-0.0498	-0.055	-0.045	0.002	-20.536	0	0.445	0.308	0.582	0.07	6.377	0	0.292	0.18	0.404	0.057	5.098	0	1.127	1.02	1.234	0.054	20.713	0	-0.1517
Mitral valve disease	circulatory system	1.2521	0.171	2.333	0.551	2.271	3.49768	1.18649	10.3088	10	6521	10	8343	0.0231692	0.104733	not_significant	0.54378	1.63509	1.4382	1.24	1.637	0.101	14.193	0	-0.05	-0.055	-0.045	0.002	-20.604	0	0.4434	0.307	0.58	0.07	6.355	0	0.2876	0.175	0.4	0.057	5.021	0	1.1266	1.02	1.233	0.054	20.71	0	-0.1545
Mitral valve stenosis and aortic valve stenosis	circulatory system	-1.0153	-3.186	1.156	1.108	-0.917	0.362294	0.0413369	3.1772	10	6521	10	8343	0.35938	0.611116	not_significant	-0.440939	0.444446	1.4318	1.233	1.63	0.101	14.133	0	-0.0498	-0.055	-0.045	0.002	-20.534	0	0.4424	0.306	0.579	0.07	6.342	0	0.2914	0.179	0.404	0.057	5.087	0	1.1255	1.019	1.232	0.054	20.693	0	-0.1537
Mixed hyperlipidemia	endocrine/metabolic	-0.0932	-0.288	0.102	0.1	-0.935	0.911011	0.749762	1.10738	165	6366	352	8001	0.34969	0.599587	not_significant	-0.0404762	0.456317	1.4284	1.23	1.627	0.101	14.086	0	-0.0496	-0.054	-0.045	0.002	-20.389	0	0.442	0.305	0.579	0.07	6.336	0	0.2886	0.176	0.401	0.057	5.038	0	1.1231	1.016	1.23	0.054	20.619	0	-0.1521
Mood disorders	mental disorders	0.0171	-0.399	0.434	0.212	0.08	1.01725	0.670991	1.54342	41	6490	58	8295	0.935844	0.974359	not_significant	0.00742644	0.0287966	1.4328	1.234	1.631	0.101	14.141	0	-0.0498	-0.055	-0.045	0.002	-20.553	0	0.4429	0.306	0.58	0.07	6.346	0	0.2902	0.178	0.402	0.057	5.068	0	1.126	1.019	1.233	0.054	20.691	0	-0.1533
Morbid obesity	endocrine/metabolic	0.2916	0.073	0.51	0.111	2.618	1.33857	1.07573	1.66529	165	6366	192	8161	0.00885427	0.0479994	mi_significant	0.12664	2.05285	1.4298	1.231	1.628	0.101	14.109	0	-0.05	-0.055	-0.045	0.002	-20.595	0	0.4423	0.306	0.579	0.07	6.339	0	0.2898	0.177	0.402	0.057	5.059	0	1.1315	1.025	1.238	0.054	20.783	0	-0.153
MRSA pneumonia	respiratory	0.59	-1.468	2.648	1.05	0.562	1.80399	0.230386	14.1258	10	6521	10	8343	0.574269	0.784182	not_significant	0.256234	0.240885	1.4332	1.235	1.632	0.101	14.147	0	-0.0498	-0.055	-0.045	0.002	-20.556	0	0.4429	0.306	0.58	0.07	6.348	0	0.2899	0.178	0.402	0.057	5.061	0	1.1258	1.019	1.232	0.054	20.698	0	-0.1532
Multiple myeloma	neoplasms	1.3011	0.368	2.234	0.476	2.732	3.67334	1.44484	9.33714	18	6513	10	8343	0.00628558	0.0369951	mi_significant	0.565061	2.20165	1.4376	1.239	1.636	0.101	14.19	0	-0.05	-0.055	-0.045	0.002	-20.603	0	0.442	0.305	0.579	0.07	6.336	0	0.2842	0.172	0.397	0.057	4.958	0	1.1248	1.018	1.231	0.054	20.677	0	-0.1532
Multiple sclerosis	neurological	-0.1669	-0.938	0.604	0.393	-0.424	0.846284	0.39141	1.82942	11	6520	19	8334	0.671376	0.849237	not_significant	-0.0724837	0.173034	1.4327	1.234	1.631	0.101	14.143	0	-0.0498	-0.055	-0.045	0.002	-20.544	0	0.4431	0.306	0.58	0.07	6.351	0	0.2902	0.178	0.402	0.057	5.068	0	1.1258	1.019	1.232	0.054	20.698	0	-0.1534
Muscle weakness	symptoms	0.1505	-0.267	0.568	0.213	0.706	1.16242	0.765673	1.76473	40	6491	59	8294	0.480394	0.713927	not_significant	0.0653613	0.318402	1.4336	1.235	1.632	0.101	14.151	0	-0.0499	-0.055	-0.045	0.002	-20.562	0	0.4424	0.306	0.579	0.07	6.342	0	0.2897	0.177	0.402	0.057	5.058	0	1.1264	1.02	1.233	0.054	20.707	0	-0.1539
Muscle/tendon sprain		-0.049	-1.009	0.911	0.49	-0.1	0.952181	0.364583	2.48681	10	6521	13	8340	0.920343	0.968005	not_significant	-0.0212804	0.0360501	1.4329	1.234	1.631	0.101	14.144	0	-0.0498	-0.055	-0.045	0.002	-20.546	0	0.4426	0.306	0.579	0.07	6.345	0	0.2902	0.178	0.402	0.057	5.067	0	1.1258	1.019	1.232	0.054	20.697	0	-0.1534
Muscular calcification and ossification	musculoskeletal	-0.9557	-3.162	1.25	1.125	-0.849	0.384543	0.042341	3.49034	10	6521	10	8343	0.395807	0.649322	not_significant	-0.415055	0.402516	1.4341	1.236	1.633	0.101	14.156	0	-0.0498	-0.055	-0.045	0.002	-20.554	0	0.4418	0.305	0.579	0.07	6.333	0	0.2896	0.177	0.402	0.057	5.056	0	1.1249	1.018	1.232	0.054	20.679	0	-0.1541
Muscular dystrophies	neurological	-0.0815	-1.444	1.281	0.695	-0.117	0.921733	0.235982	3.60024	10	6521	10	8343	0.906612	0.964476	not_significant	-0.035395	0.0425783	1.4333	1.235	1.632	0.101	14.144	0	-0.0498	-0.055	-0.045	0.002	-20.551	0	0.4426	0.306	0.579	0.07	6.345	0	0.2902	0.178	0.402	0.057	5.067	0	1.1258	1.019	1.232	0.054	20.697	0	-0.1534
Muscular wasting and disuse atrophy	symptoms	0.4955	-0.329	1.32	0.421	1.178	1.64132	0.719643	3.74342	12	6519	13	8340	0.238789	0.476256	not_significant	0.215193	0.621986	1.4359	1.237	1.634	0.101	14.17	0	-0.0499	-0.055	-0.045	0.002	-20.58	0	0.443	0.306	0.58	0.07	6.35	0	0.2891	0.177	0.401	0.057	5.048	0	1.1262	1.02	1.233	0.054	20.704	0	-0.1529
Musculoskeletal symptoms referable to limbs	symptoms	0.065	-0.255	0.385	0.163	0.398	1.06716	0.774916	1.46961	65	6466	109	8244	0.690797	0.854906	not_significant	0.0282291	0.16065	1.4338	1.235	1.632	0.101	14.15	0	-0.0499	-0.055	-0.045	0.002	-20.551	0	0.4432	0.306	0.58	0.07	6.353	0	0.29	0.178	0.402	0.057	5.064	0	1.1262	1.02	1.233	0.054	20.703	0	-0.1538
Myalgia and myositis unspecified	symptoms	0.0457	-0.174	0.265	0.112	0.407	1.04676	0.840297	1.30343	141	6390	234	8119	0.684015	0.852993	not_significant	0.0198473	0.164935	1.4333	1.235	1.632	0.101	14.149	0	-0.0499	-0.055	-0.045	0.002	-20.551	0	0.4435	0.307	0.58	0.07	6.355	0	0.2904	0.178	0.403	0.057	5.071	0	1.1268	1.02	1.234	0.054	20.697	0	-0.1536
Mycoses	infectious diseases	0.1876	-0.521	0.896	0.362	0.519	1.20635	0.593926	2.44978	17	6514	17	8336	0.603744	0.799448	not_significant	0.0814736	0.219147	1.4323	1.234	1.631	0.101	14.137	0	-0.0498	-0.055	-0.045	0.002	-20.547	0	0.4429	0.306	0.58	0.07	6.349	0	0.2897	0.177	0.402	0.057	5.058	0	1.1258	1.019	1.232	0.054	20.699	0	-0.1535
Myeloid leukemia	neoplasms	0.6493	-0.902	2.2	0.791	0.821	1.9142	0.405757	9.02501	10	6521	10	8343	0.411917	0.664412	not_significant	0.281987	0.38519	1.4333	1.235	1.632	0.101	14.148	0	-0.0498	-0.055	-0.045	0.002	-20.554	0	0.4427	0.306	0.579	0.07	6.346	0	0.29	0.178	0.402	0.057	5.063	0	1.1252	1.019	1.232	0.054	20.686	0	-0.1538
Myeloid leukemia, acute	neoplasms	1.0827	-0.011	2.177	0.558	1.94	2.95264	0.98906	8.81981	15	6516	10	8343	0.0523996	0.1889	not_significant	0.470211	1.28067	1.4302	1.231	1.629	0.101	14.11	0	-0.0498	-0.055	-0.045	0.002	-20.524	0	0.4431	0.306	0.58	0.07	6.351	0	0.2909	0.179	0.403	0.057	5.08	0	1.1248	1.018	1.231	0.054	20.677	0	-0.1534
Myeloid leukemia, chronic	neoplasms	1.3051	-0.379	2.989	0.859	1.519	3.68806	0.684546	19.8658	10	6521	10	8343	0.128684	0.330182	not_significant	0.566798	0.890476	1.4323	1.234	1.631	0.101	14.135	0	-0.0498	-0.055	-0.045	0.002	-20.539	0	0.4427	0.306	0.579	0.07	6.346	0	0.2902	0.178	0.402	0.057	5.067	0	1.1247	1.018	1.231	0.054	20.675	0	-0.1546
Myeloproliferative disease	neoplasms	0.8747	0.142	1.608	0.374	2.339	2.39816	1.15258	4.99282	22	6509	14	8339	0.019345	0.0894087	not_significant	0.379877	1.71343	1.4348	1.236	1.633	0.101	14.163	0	-0.0499	-0.055	-0.045	0.002	-20.592	0	0.4419	0.305	0.579	0.07	6.333	0	0.2906	0.178	0.403	0.057	5.073	0	1.1265	1.02	1.233	0.054	20.706	0	-0.1524
Myocardial infarction	circulatory system	0.7168	0.213	1.221	0.257	2.788	2.04787	1.23738	3.39058	33	6498	38	8315	0.00531127	0.0327301	mi_significant	0.311302	2.2748	1.4551	1.256	1.654	0.102	14.32	0	-0.0505	-0.055	-0.046	0.002	-20.723	0	0.4434	0.307	0.58	0.07	6.354	0	0.2888	0.177	0.401	0.057	5.042	0	1.1268	1.02	1.233	0.054	20.71	0	-0.1525
Myocarditis	circulatory system	-1.5798	-3.81	0.65	1.138	-1.389	0.206016	0.0221482	1.91554	10	6521	10	8343	0.16493	0.385549	not_significant	-0.686098	0.782701	1.4318	1.233	1.63	0.101	14.134	0	-0.0498	-0.055	-0.045	0.002	-20.535	0	0.4424	0.306	0.579	0.07	6.341	0	0.2902	0.178	0.402	0.057	5.067	0	1.1269	1.02	1.234	0.054	20.714	0	-0.1536
Myoneural disorders	neurological	-0.1128	-1.921	1.696	0.923	-0.122	0.893329	0.14646	5.4521	10	6521	10	8343	0.902714	0.963519	not_significant	-0.0489884	0.0444497	1.433	1.234	1.632	0.101	14.146	0	-0.0498	-0.055	-0.045	0.002	-20.552	0	0.4427	0.306	0.579	0.07	6.346	0	0.2902	0.178	0.402	0.057	5.068	0	1.1258	1.019	1.232	0.054	20.699	0	-0.1534
Myopathy	neurological	0.4352	-0.313	1.183	0.382	1.14	1.54527	0.73125	3.26415	15	6516	16	8337	0.254187	0.497059	not_significant	0.189005	0.594847	1.4337	1.235	1.632	0.101	14.15	0	-0.0499	-0.055	-0.045	0.002	-20.568	0	0.4432	0.306	0.58	0.07	6.352	0	0.291	0.179	0.403	0.057	5.081	0	1.1268	1.02	1.233	0.054	20.713	0	-0.1527
Myopia	sense organs	-0.2047	-0.474	0.065	0.137	-1.489	0.814892	0.622507	1.06716	98	6433	157	8196	0.136377	0.342096	not_significant	-0.0889001	0.865258	1.4359	1.237	1.634	0.101	14.17	0	-0.0497	-0.055	-0.045	0.002	-20.51	0	0.438	0.301	0.575	0.07	6.273	0	0.2861	0.174	0.399	0.057	4.991	0	1.1239	1.017	1.231	0.054	20.657	0	-0.1571
Myringitis	sense organs	-1.4826	-3.571	0.606	1.066	-1.391	0.227047	0.0281277	1.83308	10	6521	10	8343	0.164192	0.385549	not_significant	-0.643885	0.784649	1.4342	1.236	1.633	0.101	14.158	0	-0.0498	-0.055	-0.045	0.002	-20.546	0	0.4407	0.304	0.577	0.07	6.316	0	0.2887	0.176	0.401	0.057	5.04	0	1.1238	1.017	1.23	0.054	20.656	0	-0.1548
Nasal polyps	respiratory	-0.4758	-0.997	0.045	0.266	-1.79	0.621388	0.368985	1.04603	22	6509	54	8299	0.0734832	0.232399	not_significant	-0.206637	1.13381	1.4317	1.233	1.63	0.101	14.134	0	-0.0497	-0.054	-0.045	0.002	-20.514	0	0.443	0.306	0.58	0.07	6.349	0	0.2899	0.178	0.402	0.057	5.063	0	1.1254	1.019	1.232	0.054	20.688	0	-0.1529
Nausea and vomiting	symptoms	0.1849	0.007	0.363	0.091	2.033	1.2031	1.00702	1.43764	266	6265	293	8060	0.0420727	0.158525	not_significant	0.080301	1.376	1.4225	1.224	1.621	0.101	14.023	0	-0.0498	-0.055	-0.045	0.002	-20.521	0	0.4477	0.311	0.585	0.07	6.414	0	0.2894	0.177	0.402	0.057	5.053	0	1.1282	1.022	1.235	0.054	20.732	0	-0.153
Neoplasm of uncertain behavior	neoplasms	-0.1632	-0.409	0.082	0.125	-1.303	0.849421	0.664314	1.08546	114	6417	193	8160	0.192708	0.426674	not_significant	-0.0708769	0.715099	1.4331	1.235	1.632	0.101	14.146	0	-0.0498	-0.055	-0.045	0.002	-20.53	0	0.4427	0.306	0.579	0.07	6.345	0	0.2916	0.179	0.404	0.057	5.091	0	1.1265	1.02	1.233	0.054	20.709	0	-0.1508
Neoplasm of uncertain behavior of male genital organs	neoplasms	1.2086	-0.152	2.569	0.694	1.741	3.34879	0.858988	13.0528	10	6521	10	8343	0.081618	0.250411	not_significant	0.524888	1.08821	1.431	1.232	1.63	0.101	14.125	0	-0.0498	-0.055	-0.045	0.002	-20.53	0	0.4427	0.306	0.579	0.07	6.346	0	0.2889	0.177	0.401	0.057	5.044	0	1.1247	1.018	1.231	0.054	20.678	0	-0.1548
Neoplasm of uncertain behavior of skin	neoplasms	-0.5734	-0.747	-0.399	0.089	-6.459	0.563606	0.473786	0.670991	198	6333	507	7846	1.05198e-10	6.06779e-09	con_significant	-0.249024	9.97799	1.435	1.236	1.634	0.101	14.159	0	-0.049	-0.054	-0.044	0.002	-20.179	0	0.4149	0.278	0.552	0.07	5.935	0	0.2793	0.167	0.392	0.057	4.867	0	1.1122	1.005	1.219	0.055	20.403	0	-0.1624
Neoplasm of unspecified nature of digestive system	neoplasms	0.4011	-0.54	1.342	0.48	0.835	1.49347	0.582748	3.82669	10	6521	12	8341	0.403446	0.656165	not_significant	0.174196	0.394215	1.4351	1.237	1.634	0.101	14.162	0	-0.0499	-0.055	-0.045	0.002	-20.568	0	0.443	0.306	0.58	0.07	6.35	0	0.2901	0.178	0.402	0.057	5.065	0	1.1259	1.019	1.233	0.054	20.7	0	-0.1536
Nephritis and nephropathy in diseases classified elsewhere	genitourinary	2.1388	0.806	3.472	0.68	3.144	8.48924	2.23893	32.2011	14	6517	10	8343	0.00166602	0.0129162	mi_significant	0.928869	2.77832	1.4385	1.24	1.637	0.101	14.189	0	-0.05	-0.055	-0.045	0.002	-20.609	0	0.4363	0.299	0.573	0.07	6.247	0	0.2904	0.178	0.403	0.057	5.07	0	1.1267	1.02	1.233	0.054	20.711	0	-0.1534
Nephritis and nephropathy with pathological lesion	genitourinary	1.1189	0.421	1.817	0.356	3.141	3.06148	1.52348	6.15337	23	6508	14	8339	0.00168326	0.01298	mi_significant	0.485932	2.77385	1.4381	1.239	1.637	0.101	14.189	0	-0.05	-0.055	-0.045	0.002	-20.618	0	0.4424	0.306	0.579	0.07	6.34	0	0.2916	0.179	0.404	0.057	5.091	0	1.1273	1.021	1.234	0.054	20.719	0	-0.1548
Nephrotic syndrome without mention of glomerulonephritis	genitourinary	0.4374	-0.454	1.329	0.455	0.961	1.54868	0.635083	3.77726	10	6521	11	8342	0.336304	0.587108	not_significant	0.18996	0.473267	1.4335	1.235	1.632	0.101	14.15	0	-0.0499	-0.055	-0.045	0.002	-20.564	0	0.4424	0.306	0.579	0.07	6.341	0	0.2911	0.179	0.403	0.057	5.082	0	1.1264	1.02	1.233	0.054	20.707	0	-0.1533
Nerve plexus lesions	neurological	-0.3868	-1.187	0.414	0.409	-0.947	0.679227	0.305135	1.51286	10	6521	19	8334	0.343694	0.593541	not_significant	-0.167985	0.463828	1.4342	1.236	1.633	0.101	14.156	0	-0.0498	-0.055	-0.045	0.002	-20.554	0	0.4417	0.305	0.578	0.07	6.332	0	0.2897	0.177	0.402	0.057	5.058	0	1.1257	1.019	1.232	0.054	20.696	0	-0.1535
Nerve root and plexus disorders	neurological	-0.2705	-1.505	0.964	0.63	-0.429	0.762998	0.222017	2.62216	10	6521	10	8343	0.667622	0.847323	not_significant	-0.117477	0.17547	1.4331	1.235	1.632	0.101	14.146	0	-0.0498	-0.055	-0.045	0.002	-20.542	0	0.4422	0.305	0.579	0.07	6.338	0	0.2895	0.177	0.402	0.057	5.054	0	1.1251	1.018	1.232	0.054	20.676	0	-0.1542
Nerve root lesions	neurological	-1.7006	-3.792	0.391	1.067	-1.593	0.182574	0.0225505	1.47846	10	6521	10	8343	0.111069	0.30228	not_significant	-0.738561	0.954406	1.4322	1.234	1.631	0.101	14.136	0	-0.0498	-0.055	-0.045	0.002	-20.537	0	0.4422	0.305	0.579	0.07	6.339	0	0.2935	0.181	0.406	0.057	5.122	0	1.1253	1.019	1.232	0.054	20.689	0	-0.1539
Nervous system congenital anomalies	congenital anomalies	-0.9249	-3.38	1.53	1.253	-0.738	0.396571	0.0340475	4.61818	10	6521	10	8343	0.460289	0.697936	not_significant	-0.401679	0.336969	1.4338	1.235	1.632	0.101	14.152	0	-0.0499	-0.055	-0.045	0.002	-20.559	0	0.4435	0.307	0.58	0.07	6.356	0	0.2902	0.178	0.402	0.057	5.068	0	1.1262	1.02	1.233	0.054	20.704	0	-0.1532
Neural tube defects	congenital anomalies	0.6232	-1.828	3.074	1.251	0.498	1.86489	0.160735	21.6282	10	6521	10	8343	0.618228	0.812658	not_significant	0.270652	0.208851	1.4325	1.234	1.631	0.101	14.141	0	-0.0498	-0.055	-0.045	0.002	-20.547	0	0.4427	0.306	0.579	0.07	6.346	0	0.2899	0.178	0.402	0.057	5.063	0	1.1257	1.019	1.232	0.054	20.696	0	-0.1535
Neuralgia, neuritis, and radiculitis NOS	symptoms	0.2194	-0.104	0.543	0.165	1.328	1.24533	0.901225	1.72116	71	6460	97	8256	0.18407	0.414734	not_significant	0.0952842	0.735016	1.4377	1.239	1.636	0.101	14.182	0	-0.05	-0.055	-0.045	0.002	-20.591	0	0.4426	0.306	0.579	0.07	6.344	0	0.2894	0.177	0.402	0.057	5.053	0	1.1263	1.02	1.233	0.054	20.707	0	-0.1541
Neuroendocrine tumors	neoplasms	1.2841	-0.529	3.098	0.925	1.388	3.61142	0.589194	22.1536	10	6521	10	8343	0.165195	0.385549	not_significant	0.557678	0.782004	1.433	1.234	1.632	0.101	14.145	0	-0.0499	-0.055	-0.045	0.002	-20.565	0	0.4434	0.307	0.58	0.07	6.355	0	0.2917	0.179	0.404	0.057	5.093	0	1.1271	1.02	1.234	0.054	20.717	0	-0.1521
Neurofibromatosis	neoplasms	1.4145	-0.268	3.097	0.858	1.648	4.11443	0.764908	22.1315	10	6521	10	8343	0.0993963	0.285517	not_significant	0.61431	1.00263	1.4337	1.235	1.632	0.101	14.149	0	-0.0499	-0.055	-0.045	0.002	-20.565	0	0.4428	0.306	0.579	0.07	6.346	0	0.2913	0.179	0.404	0.057	5.086	0	1.1255	1.019	1.232	0.054	20.689	0	-0.1525
Neurological disorders	mental disorders	-0.1499	-0.533	0.233	0.196	-0.766	0.860794	0.586842	1.26238	45	6486	77	8276	0.443487	0.687869	not_significant	-0.0651007	0.353119	1.4343	1.236	1.633	0.101	14.157	0	-0.0498	-0.055	-0.045	0.002	-20.551	0	0.4422	0.306	0.579	0.07	6.339	0	0.2905	0.178	0.403	0.057	5.072	0	1.125	1.018	1.232	0.054	20.678	0	-0.1534
Neutropenia	hematopoietic	1.1065	0.691	1.522	0.212	5.216	3.02376	1.99571	4.58138	89	6442	35	8318	1.83048e-07	4.6308e-06	mi_significant	0.480547	6.73743	1.4201	1.221	1.619	0.101	14.006	0	-0.0496	-0.054	-0.045	0.002	-20.452	0	0.4386	0.302	0.575	0.07	6.285	0	0.2874	0.175	0.4	0.057	5.015	0	1.1216	1.015	1.228	0.054	20.603	0	-0.1586
Nevus, non-neoplastic	neoplasms	-0.7995	-1.096	-0.503	0.151	-5.285	0.449554	0.334205	0.604714	65	6466	177	8176	1.25454e-07	3.28917e-06	con_significant	-0.347218	6.90152	1.4289	1.23	1.628	0.101	14.103	0	-0.0493	-0.054	-0.045	0.002	-20.336	0	0.4289	0.292	0.566	0.07	6.144	0	0.2988	0.186	0.411	0.057	5.207	0	1.125	1.018	1.232	0.054	20.655	0	-0.1655
Nodular lymphoma	neoplasms	0.0509	-1.206	1.308	0.641	0.079	1.05222	0.299392	3.69877	10	6521	10	8343	0.936683	0.974529	not_significant	0.0221056	0.0284072	1.433	1.234	1.632	0.101	14.145	0	-0.0498	-0.055	-0.045	0.002	-20.552	0	0.4427	0.306	0.579	0.07	6.346	0	0.2902	0.178	0.402	0.057	5.067	0	1.1257	1.019	1.232	0.054	20.694	0	-0.1534
Non-healing surgical wound		0.0442	-2.457	2.545	1.276	0.035	1.04519	0.0856916	12.7432	10	6521	10	8343	0.972401	0.987936	not_significant	0.0191958	0.0121547	1.433	1.234	1.632	0.101	14.145	0	-0.0498	-0.055	-0.045	0.002	-20.55	0	0.4427	0.306	0.579	0.07	6.346	0	0.2902	0.178	0.402	0.057	5.068	0	1.1259	1.019	1.232	0.054	20.699	0	-0.1534
Non-Hodgkins lymphoma	neoplasms	0.6983	0.146	1.25	0.282	2.48	2.01033	1.1572	3.49034	38	6493	23	8330	0.0131469	0.0656795	not_significant	0.303268	1.88118	1.4334	1.235	1.632	0.101	14.152	0	-0.0499	-0.055	-0.045	0.002	-20.583	0	0.4407	0.304	0.577	0.07	6.316	0	0.2904	0.178	0.403	0.057	5.07	0	1.1238	1.017	1.23	0.054	20.657	0	-0.1533
Non-proliferative glomerulonephritis	genitourinary	0.6454	-0.375	1.666	0.521	1.24	1.90675	0.687289	5.29096	10	6521	10	8343	0.215037	0.451359	not_significant	0.280294	0.667486	1.4325	1.234	1.631	0.101	14.138	0	-0.0498	-0.055	-0.045	0.002	-20.553	0	0.4417	0.305	0.578	0.07	6.331	0	0.2912	0.179	0.403	0.057	5.084	0	1.1262	1.02	1.233	0.054	20.704	0	-0.1531
Nonallopathic lesions NEC	symptoms	-0.3304	-0.885	0.224	0.283	-1.168	0.718636	0.412714	1.25107	20	6511	41	8312	0.242931	0.482516	not_significant	-0.143491	0.614517	1.4299	1.231	1.629	0.101	14.112	0	-0.0498	-0.055	-0.045	0.002	-20.512	0	0.4437	0.307	0.58	0.07	6.36	0	0.2955	0.183	0.408	0.057	5.145	0	1.1258	1.019	1.232	0.054	20.701	0	-0.1533
Noninfectious dermatoses of eyelid	sense organs	-0.4727	-1.691	0.746	0.622	-0.76	0.623317	0.184335	2.10855	10	6521	10	8343	0.447009	0.689289	not_significant	-0.205291	0.349684	1.433	1.234	1.632	0.101	14.145	0	-0.0498	-0.055	-0.045	0.002	-20.549	0	0.4424	0.306	0.579	0.07	6.342	0	0.2902	0.178	0.402	0.057	5.067	0	1.126	1.019	1.233	0.054	20.701	0	-0.1531
Noninfectious disorders of lymphatic channels	circulatory system	-0.1432	-1.057	0.771	0.466	-0.307	0.866581	0.347497	2.16193	10	6521	14	8339	0.758823	0.895436	not_significant	-0.062191	0.11986	1.4327	1.234	1.631	0.101	14.142	0	-0.0498	-0.055	-0.045	0.002	-20.544	0	0.443	0.306	0.58	0.07	6.349	0	0.2902	0.178	0.402	0.057	5.067	0	1.1258	1.019	1.232	0.054	20.698	0	-0.1534
Noninfectious gastroenteritis	digestive	-0.0411	-0.274	0.192	0.119	-0.346	0.959733	0.760332	1.21167	130	6401	202	8151	0.729368	0.881599	not_significant	-0.0178495	0.137054	1.434	1.235	1.633	0.101	14.149	0	-0.0498	-0.055	-0.045	0.002	-20.55	0	0.442	0.305	0.579	0.07	6.333	0	0.2897	0.177	0.402	0.057	5.058	0	1.1251	1.018	1.232	0.054	20.669	0	-0.1535
Noninflammatory female genital disorders	genitourinary	0.3256	-1.044	1.695	0.699	0.466	1.38486	0.352044	5.44665	10	6521	10	8343	0.64122	0.825571	not_significant	0.141406	0.192993	1.4324	1.234	1.631	0.101	14.139	0	-0.0498	-0.055	-0.045	0.002	-20.548	0	0.4425	0.306	0.579	0.07	6.342	0	0.2903	0.178	0.403	0.057	5.07	0	1.1259	1.019	1.232	0.054	20.7	0	-0.1533
Nonrheumatic aortic valve disorders	circulatory system	1.0857	0.465	1.707	0.317	3.427	2.96151	1.59201	5.5124	25	6506	21	8332	0.000610264	0.00575163	mi_significant	0.471514	3.21448	1.4476	1.249	1.646	0.101	14.278	0	-0.0503	-0.055	-0.046	0.002	-20.725	0	0.4459	0.309	0.583	0.07	6.387	0	0.2919	0.18	0.404	0.057	5.095	0	1.1308	1.024	1.238	0.054	20.773	0	-0.1511
Nonrheumatic mitral valve disorders	circulatory system	0.5632	0.06	1.066	0.257	2.194	1.75628	1.06184	2.90374	32	6499	37	8316	0.0282557	0.122725	not_significant	0.244595	1.54889	1.4404	1.242	1.639	0.101	14.214	0	-0.0501	-0.055	-0.045	0.002	-20.638	0	0.444	0.307	0.581	0.07	6.364	0	0.2891	0.177	0.401	0.057	5.048	0	1.1271	1.02	1.234	0.054	20.719	0	-0.1544
Nonrheumatic pulmonary valve disorders	circulatory system	0.331	-1.013	1.675	0.686	0.483	1.39236	0.363128	5.3388	10	6521	10	8343	0.629393	0.818382	not_significant	0.143751	0.201078	1.433	1.234	1.632	0.101	14.146	0	-0.0498	-0.055	-0.045	0.002	-20.555	0	0.4428	0.306	0.58	0.07	6.348	0	0.2902	0.178	0.402	0.057	5.068	0	1.1262	1.02	1.233	0.054	20.704	0	-0.1531
Nonrheumatic tricuspid valve disorders	circulatory system	1.0216	-0.046	2.09	0.545	1.875	2.77764	0.955042	8.08492	10	6521	10	8343	0.0608219	0.203659	not_significant	0.443675	1.21594	1.4337	1.235	1.632	0.101	14.152	0	-0.0499	-0.055	-0.045	0.002	-20.57	0	0.4427	0.306	0.579	0.07	6.345	0	0.2899	0.178	0.402	0.057	5.061	0	1.1271	1.021	1.234	0.054	20.72	0	-0.1535
Nonsenile Cataract	sense organs	-0.1345	-1.772	1.503	0.836	-0.161	0.874153	0.169993	4.49515	10	6521	10	8343	0.872136	0.943451	not_significant	-0.0584126	0.0594156	1.4324	1.234	1.631	0.101	14.13	0	-0.0498	-0.055	-0.045	0.002	-20.529	0	0.4432	0.306	0.58	0.07	6.347	0	0.2902	0.178	0.402	0.057	5.067	0	1.1258	1.019	1.232	0.054	20.699	0	-0.1534
Nonspecific abnormal findings in stool contents	digestive	0.3497	0.004	0.695	0.176	1.983	1.41864	1.00401	2.00371	64	6467	80	8273	0.0473773	0.174727	not_significant	0.151873	1.32443	1.4355	1.237	1.634	0.101	14.168	0	-0.05	-0.055	-0.045	0.002	-20.609	0	0.4466	0.31	0.583	0.07	6.398	0	0.292	0.18	0.404	0.057	5.097	0	1.1285	1.022	1.235	0.054	20.739	0	-0.1534
Nonspecific abnormal findings on radiological and other examination of biliary tract	digestive	-0.0592	-0.894	0.776	0.426	-0.139	0.942518	0.409016	2.17276	10	6521	16	8337	0.889485	0.954344	not_significant	-0.0257102	0.0508613	1.4331	1.235	1.632	0.101	14.146	0	-0.0498	-0.055	-0.045	0.002	-20.551	0	0.4425	0.306	0.579	0.07	6.342	0	0.2901	0.178	0.402	0.057	5.064	0	1.1256	1.019	1.232	0.054	20.685	0	-0.1536
Nonspecific abnormal findings on radiological and other examination of musculoskeletal system	symptoms	-0.1728	-0.674	0.329	0.256	-0.675	0.841306	0.509666	1.38958	27	6504	44	8309	0.499491	0.73158	not_significant	-0.0750461	0.301472	1.4333	1.235	1.632	0.101	14.149	0	-0.0498	-0.055	-0.045	0.002	-20.536	0	0.4418	0.305	0.579	0.07	6.332	0	0.29	0.178	0.402	0.057	5.063	0	1.1249	1.018	1.232	0.054	20.676	0	-0.1547
Nonspecific abnormal findings on radiological and other examination of other intrathoracic organs (echocardiogram, etc)	symptoms	0.0614	-0.514	0.637	0.294	0.209	1.06332	0.598098	1.8908	20	6511	35	8318	0.834518	0.927863	not_significant	0.0266657	0.0785644	1.4334	1.235	1.632	0.101	14.147	0	-0.0499	-0.055	-0.045	0.002	-20.546	0	0.4429	0.306	0.58	0.07	6.348	0	0.2901	0.178	0.402	0.057	5.067	0	1.1261	1.019	1.233	0.054	20.699	0	-0.1533
Nonspecific abnormal findings on radiological and other examination of skull and head	neurological	0.7579	0.038	1.478	0.367	2.063	2.13379	1.03873	4.38417	18	6513	15	8338	0.0391601	0.153448	not_significant	0.329152	1.40716	1.4339	1.235	1.632	0.101	14.158	0	-0.0499	-0.055	-0.045	0.002	-20.587	0	0.4419	0.305	0.579	0.07	6.334	0	0.292	0.18	0.404	0.057	5.098	0	1.1273	1.021	1.234	0.054	20.72	0	-0.1537
Nonspecific abnormal results of function study of brain and central nervous system	neurological	-0.628	-2.03	0.774	0.715	-0.878	0.533658	0.131336	2.16842	10	6521	10	8343	0.38004	0.633546	not_significant	-0.272737	0.420171	1.4336	1.235	1.632	0.101	14.152	0	-0.0498	-0.055	-0.045	0.002	-20.555	0	0.4428	0.306	0.579	0.07	6.347	0	0.2907	0.178	0.403	0.057	5.075	0	1.1256	1.019	1.232	0.054	20.694	0	-0.1536
Nonspecific chest pain	circulatory system	-0.0833	-0.214	0.047	0.067	-1.253	0.920075	0.807348	1.04812	428	6103	724	7629	0.210307	0.44532	not_significant	-0.0361767	0.677146	1.4328	1.234	1.631	0.101	14.143	0	-0.0496	-0.054	-0.045	0.002	-20.419	0	0.4373	0.3	0.574	0.07	6.258	0	0.2884	0.176	0.401	0.057	5.035	0	1.122	1.015	1.229	0.054	20.597	0	-0.1539
Nonspecific elevation of levels of transaminase or lactic acid dehydrogenase [LDH]	digestive	0.198	-0.008	0.404	0.105	1.883	1.21896	0.992032	1.4978	196	6335	209	8144	0.059635	0.201389	not_significant	0.0859903	1.2245	1.427	1.228	1.626	0.101	14.08	0	-0.0498	-0.055	-0.045	0.002	-20.555	0	0.4455	0.309	0.582	0.07	6.384	0	0.2857	0.173	0.398	0.057	4.985	0	1.1282	1.022	1.235	0.054	20.733	0	-0.1507
Nonspecific findings on examination of blood	symptoms	0.2222	-0.04	0.484	0.134	1.661	1.24882	0.960789	1.62255	108	6423	146	8207	0.0967361	0.281237	not_significant	0.0965002	1.01441	1.4354	1.237	1.634	0.101	14.167	0	-0.05	-0.055	-0.045	0.002	-20.606	0	0.4466	0.31	0.583	0.07	6.397	0	0.2889	0.177	0.401	0.057	5.045	0	1.1306	1.024	1.237	0.054	20.753	0	-0.1506
Nontoxic multinodular goiter	endocrine/metabolic	0.3463	-0.25	0.942	0.304	1.139	1.41383	0.778801	2.56511	19	6512	30	8323	0.254734	0.497059	not_significant	0.150396	0.593913	1.4363	1.238	1.635	0.101	14.171	0	-0.0499	-0.055	-0.045	0.002	-20.578	0	0.4432	0.306	0.58	0.07	6.353	0	0.2911	0.179	0.403	0.057	5.083	0	1.1268	1.02	1.233	0.054	20.713	0	-0.1542
Nontoxic nodular goiter	endocrine/metabolic	0.1879	-0.559	0.935	0.381	0.493	1.20671	0.571781	2.54721	12	6519	19	8334	0.622133	0.813964	not_significant	0.0816039	0.206117	1.4333	1.235	1.632	0.101	14.149	0	-0.0498	-0.055	-0.045	0.002	-20.556	0	0.4426	0.306	0.579	0.07	6.344	0	0.29	0.178	0.402	0.057	5.064	0	1.1259	1.019	1.233	0.054	20.701	0	-0.154
Nontoxic uninodular goiter	endocrine/metabolic	0.2054	-0.216	0.626	0.215	0.956	1.22802	0.805735	1.87012	40	6491	59	8294	0.338906	0.589508	not_significant	0.0892041	0.469921	1.4337	1.235	1.632	0.101	14.154	0	-0.0499	-0.055	-0.045	0.002	-20.568	0	0.4435	0.307	0.58	0.07	6.356	0	0.2902	0.178	0.402	0.057	5.067	0	1.1263	1.02	1.233	0.054	20.706	0	-0.1549
Nutritional marasmus	endocrine/metabolic	2.1443	-0.413	4.702	1.305	1.644	8.53606	0.661662	110.167	10	6521	10	8343	0.100275	0.286448	not_significant	0.931258	0.998808	1.4369	1.238	1.635	0.101	14.18	0	-0.0499	-0.055	-0.045	0.002	-20.587	0	0.4428	0.306	0.58	0.07	6.348	0	0.2878	0.175	0.4	0.057	5.023	0	1.126	1.019	1.233	0.054	20.702	0	-0.1532
Nystagmus and other irregular eye movements	sense organs	0.0802	-1.095	1.255	0.6	0.134	1.0835	0.33454	3.50784	10	6521	10	8343	0.893578	0.956647	not_significant	0.0348304	0.0488677	1.4331	1.235	1.632	0.101	14.146	0	-0.0498	-0.055	-0.045	0.002	-20.552	0	0.4427	0.306	0.579	0.07	6.345	0	0.2901	0.178	0.402	0.057	5.066	0	1.1258	1.019	1.232	0.054	20.699	0	-0.1534
Obesity	endocrine/metabolic	-0.0999	-0.223	0.023	0.063	-1.595	0.904928	0.800115	1.02327	481	6050	789	7564	0.110774	0.30228	not_significant	-0.043386	0.955561	1.4402	1.241	1.639	0.101	14.201	0	-0.0497	-0.054	-0.045	0.002	-20.503	0	0.4409	0.304	0.578	0.07	6.319	0	0.2892	0.177	0.401	0.057	5.049	0	1.1184	1.011	1.225	0.055	20.488	0	-0.1557
Obsessive-compulsive disorders	mental disorders	0.0414	-0.617	0.7	0.336	0.123	1.04227	0.539561	2.01375	17	6514	22	8331	0.901921	0.963385	not_significant	0.0179798	0.0448314	1.4328	1.234	1.631	0.101	14.143	0	-0.0498	-0.055	-0.045	0.002	-20.552	0	0.4427	0.306	0.579	0.07	6.347	0	0.2902	0.178	0.402	0.057	5.067	0	1.1259	1.019	1.232	0.054	20.7	0	-0.1534
Obstruction of bile duct	digestive	0.9676	-0.127	2.062	0.558	1.733	2.63162	0.880734	7.86168	10	6521	10	8343	0.0831416	0.2524	not_significant	0.420223	1.08018	1.4357	1.237	1.634	0.101	14.168	0	-0.0499	-0.055	-0.045	0.002	-20.583	0	0.4426	0.306	0.579	0.07	6.344	0	0.2902	0.178	0.402	0.057	5.067	0	1.1263	1.02	1.233	0.054	20.705	0	-0.1529
Obstructive chronic bronchitis	respiratory	1.1631	-0.27	2.596	0.731	1.591	3.19984	0.763379	13.41	10	6521	10	8343	0.111558	0.302692	not_significant	0.505128	0.952498	1.4395	1.241	1.638	0.101	14.196	0	-0.05	-0.055	-0.045	0.002	-20.599	0	0.4418	0.305	0.578	0.07	6.333	0	0.2894	0.177	0.402	0.057	5.053	0	1.1265	1.02	1.233	0.054	20.709	0	-0.1533
Obstructive genitourinary defect	congenital anomalies	-0.4237	-2.171	1.323	0.891	-0.475	0.65462	0.114063	3.75467	10	6521	10	8343	0.634489	0.822043	not_significant	-0.184011	0.197576	1.4329	1.234	1.631	0.101	14.145	0	-0.0498	-0.055	-0.045	0.002	-20.548	0	0.4433	0.307	0.58	0.07	6.353	0	0.2899	0.178	0.402	0.057	5.062	0	1.1257	1.019	1.232	0.054	20.695	0	-0.1537
Obstructive sleep apnea	neurological	-0.111	-0.254	0.032	0.073	-1.524	0.894939	0.775692	1.03252	344	6187	605	7748	0.127608	0.329402	not_significant	-0.0482067	0.894122	1.4269	1.228	1.626	0.101	14.078	0	-0.0495	-0.054	-0.045	0.002	-20.309	0	0.4402	0.303	0.577	0.07	6.308	0	0.2888	0.176	0.401	0.057	5.041	0	1.1223	1.016	1.229	0.054	20.616	0	-0.1546
Occlusion and stenosis of precerebral arteries	circulatory system	0.1102	-0.971	1.191	0.552	0.2	1.1165	0.378704	3.29037	10	6521	13	8340	0.841655	0.930536	not_significant	0.0478593	0.0748658	1.4339	1.235	1.633	0.101	14.14	0	-0.0499	-0.055	-0.045	0.002	-20.534	0	0.4427	0.306	0.579	0.07	6.347	0	0.2902	0.178	0.402	0.057	5.067	0	1.1259	1.019	1.232	0.054	20.7	0	-0.1535
Occlusion of cerebral arteries	circulatory system	0.5727	-2.511	3.656	1.573	0.364	1.77305	0.081187	38.7062	10	6521	10	8343	0.715848	0.872254	not_significant	0.24872	0.145179	1.4335	1.235	1.632	0.101	14.149	0	-0.0498	-0.055	-0.045	0.002	-20.555	0	0.4427	0.306	0.579	0.07	6.346	0	0.2902	0.178	0.402	0.057	5.068	0	1.1257	1.019	1.232	0.054	20.696	0	-0.1535
Occlusion of cerebral arteries, with cerebral infarction	circulatory system	-0.2447	-2.653	2.163	1.229	-0.199	0.782939	0.0704396	8.69719	10	6521	10	8343	0.842129	0.930536	not_significant	-0.106272	0.0746215	1.4328	1.234	1.631	0.101	14.144	0	-0.0498	-0.055	-0.045	0.002	-20.55	0	0.4427	0.306	0.579	0.07	6.346	0	0.2905	0.178	0.403	0.057	5.071	0	1.1258	1.019	1.232	0.054	20.699	0	-0.1534
Oliguria and anuria	genitourinary	0.5366	-0.858	1.931	0.712	0.754	1.71018	0.424009	6.8964	10	6521	10	8343	0.450762	0.689289	not_significant	0.233042	0.346052	1.4334	1.235	1.632	0.101	14.149	0	-0.0498	-0.055	-0.045	0.002	-20.556	0	0.441	0.304	0.578	0.07	6.319	0	0.2899	0.178	0.402	0.057	5.061	0	1.1258	1.019	1.232	0.054	20.698	0	-0.1536
Open wound of finger(s)	injuries & poisonings	-0.508	-0.89	-0.126	0.195	-2.608	0.601698	0.410656	0.881615	40	6491	98	8255	0.00911404	0.049039	con_significant	-0.220622	2.04029	1.4387	1.24	1.637	0.101	14.198	0	-0.0498	-0.055	-0.045	0.002	-20.551	0	0.4398	0.303	0.577	0.07	6.303	0	0.2886	0.176	0.401	0.057	5.038	0	1.1224	1.016	1.229	0.054	20.627	0	-0.1535
Open wound of foot except toe(s) alone	injuries & poisonings	0.0778	-0.655	0.811	0.374	0.208	1.08091	0.519442	2.25016	13	6518	20	8333	0.835316	0.927863	not_significant	0.0337881	0.0781494	1.433	1.234	1.632	0.101	14.146	0	-0.0498	-0.055	-0.045	0.002	-20.553	0	0.443	0.306	0.58	0.07	6.349	0	0.2903	0.178	0.403	0.057	5.07	0	1.1261	1.019	1.233	0.054	20.699	0	-0.1532
Open wound of genital organs	injuries & poisonings	-1.7098	-3.877	0.457	1.106	-1.547	0.180902	0.0207129	1.57933	10	6521	10	8343	0.121977	0.319803	not_significant	-0.742557	0.913721	1.4342	1.236	1.633	0.101	14.157	0	-0.0498	-0.055	-0.045	0.002	-20.552	0	0.443	0.306	0.58	0.07	6.35	0	0.2897	0.177	0.402	0.057	5.058	0	1.1253	1.019	1.232	0.054	20.686	0	-0.154
Open wound of hand except finger(s)	injuries & poisonings	-0.6329	-1.235	-0.031	0.307	-2.06	0.53105	0.290835	0.969476	16	6515	40	8313	0.0393919	0.153824	not_significant	-0.274865	1.40459	1.4377	1.239	1.636	0.101	14.188	0	-0.0499	-0.055	-0.045	0.002	-20.561	0	0.4407	0.304	0.578	0.07	6.316	0	0.289	0.177	0.401	0.057	5.046	0	1.1234	1.017	1.23	0.054	20.648	0	-0.1555
Open wound of lip and mouth	injuries & poisonings	-0.6365	-1.738	0.465	0.562	-1.133	0.529141	0.175872	1.59201	10	6521	13	8340	0.257187	0.499144	not_significant	-0.276428	0.589751	1.4337	1.235	1.632	0.101	14.152	0	-0.0498	-0.055	-0.045	0.002	-20.553	0	0.4426	0.306	0.579	0.07	6.345	0	0.2901	0.178	0.402	0.057	5.065	0	1.1258	1.019	1.232	0.054	20.698	0	-0.153
Open wound of nose and sinus	injuries & poisonings	0.6695	-0.619	1.958	0.657	1.018	1.95326	0.538483	7.08514	10	6521	10	8343	0.308447	0.553899	not_significant	0.29076	0.510819	1.4342	1.236	1.633	0.101	14.155	0	-0.0499	-0.055	-0.045	0.002	-20.567	0	0.4438	0.307	0.581	0.07	6.36	0	0.291	0.179	0.403	0.057	5.08	0	1.1265	1.02	1.233	0.054	20.709	0	-0.1527
Open wound of toe(s)	injuries & poisonings	-0.174	-1.016	0.668	0.43	-0.405	0.840297	0.36204	1.95033	10	6521	16	8337	0.68561	0.853019	not_significant	-0.0755672	0.163923	1.4336	1.235	1.632	0.101	14.149	0	-0.0498	-0.055	-0.045	0.002	-20.553	0	0.4423	0.306	0.579	0.07	6.339	0	0.2902	0.178	0.402	0.057	5.067	0	1.1255	1.019	1.232	0.054	20.69	0	-0.1535
Open wound or laceration of eye or eyelid	injuries & poisonings	-0.1535	-1.105	0.798	0.485	-0.316	0.857701	0.331211	2.22109	10	6521	13	8340	0.751825	0.892722	not_significant	-0.0666642	0.123883	1.433	1.234	1.632	0.101	14.146	0	-0.0498	-0.055	-0.045	0.002	-20.549	0	0.4424	0.306	0.579	0.07	6.341	0	0.2902	0.178	0.402	0.057	5.068	0	1.1256	1.019	1.232	0.054	20.693	0	-0.1535
Open wounds of extremities	injuries & poisonings	-0.3277	-0.803	0.148	0.243	-1.351	0.720579	0.447983	1.15951	27	6504	57	8296	0.176691	0.40251	not_significant	-0.142318	0.752785	1.4348	1.236	1.633	0.101	14.161	0	-0.0498	-0.055	-0.045	0.002	-20.55	0	0.4417	0.305	0.578	0.07	6.332	0	0.2909	0.179	0.403	0.057	5.079	0	1.1244	1.018	1.231	0.054	20.669	0	-0.1533
Open wounds of head; neck; and trunk	injuries & poisonings	0.0489	-0.364	0.462	0.211	0.232	1.05012	0.694891	1.58725	43	6488	60	8293	0.816418	0.923301	not_significant	0.021237	0.0880874	1.4325	1.234	1.631	0.101	14.138	0	-0.0498	-0.055	-0.045	0.002	-20.554	0	0.4432	0.306	0.58	0.07	6.35	0	0.2905	0.178	0.403	0.057	5.072	0	1.1264	1.02	1.233	0.054	20.691	0	-0.1529
Open-angle glaucoma	sense organs	0.2206	-0.591	1.032	0.414	0.533	1.24682	0.553773	2.80667	10	6521	17	8336	0.594217	0.795599	not_significant	0.0958054	0.226055	1.4342	1.236	1.633	0.101	14.155	0	-0.0499	-0.055	-0.045	0.002	-20.556	0	0.4429	0.306	0.58	0.07	6.349	0	0.2912	0.179	0.404	0.057	5.083	0	1.1268	1.02	1.233	0.054	20.705	0	-0.1525
Opiates and related narcotics causing adverse effects in therapeutic use	injuries & poisonings	1.2879	0.483	2.093	0.411	3.135	3.62517	1.62093	8.10921	26	6505	10	8343	0.0017168	0.0131682	mi_significant	0.559328	2.76528	1.4378	1.239	1.636	0.101	14.181	0	-0.05	-0.055	-0.045	0.002	-20.602	0	0.4439	0.307	0.581	0.07	6.362	0	0.2894	0.177	0.402	0.057	5.052	0	1.1233	1.017	1.23	0.054	20.644	0	-0.1531
Optic atrophy	sense organs	0.5243	-0.496	1.545	0.521	1.007	1.68928	0.608962	4.68797	10	6521	10	8343	0.313877	0.560161	not_significant	0.227701	0.503241	1.4327	1.234	1.631	0.101	14.142	0	-0.0498	-0.055	-0.045	0.002	-20.556	0	0.4404	0.304	0.577	0.07	6.309	0	0.2911	0.179	0.403	0.057	5.082	0	1.1264	1.02	1.233	0.054	20.707	0	-0.1527
Optic neuritis/neuropathy	sense organs	0.1029	-0.867	1.073	0.495	0.208	1.10838	0.42021	2.92414	10	6521	13	8340	0.835221	0.927863	not_significant	0.0446889	0.0781983	1.4334	1.235	1.632	0.101	14.147	0	-0.0498	-0.055	-0.045	0.002	-20.548	0	0.4427	0.306	0.579	0.07	6.347	0	0.2904	0.178	0.403	0.057	5.07	0	1.126	1.019	1.233	0.054	20.7	0	-0.1533
Oral aphthae	digestive	-0.1323	-0.714	0.45	0.297	-0.446	0.876078	0.489682	1.56831	19	6512	33	8320	0.655877	0.836373	not_significant	-0.0574572	0.183178	1.4337	1.235	1.632	0.101	14.151	0	-0.0498	-0.055	-0.045	0.002	-20.552	0	0.4422	0.305	0.579	0.07	6.337	0	0.2898	0.178	0.402	0.057	5.06	0	1.1251	1.018	1.232	0.054	20.677	0	-0.1538
Orchitis and epididymitis	genitourinary	-0.4726	-0.767	-0.178	0.15	-3.148	0.623379	0.464404	0.836942	70	6461	158	8195	0.00164637	0.0128328	con_significant	-0.205248	2.78347	1.438	1.239	1.637	0.101	14.19	0	-0.0498	-0.055	-0.045	0.002	-20.521	0	0.4457	0.309	0.583	0.07	6.384	0	0.291	0.179	0.403	0.057	5.079	0	1.122	1.015	1.229	0.054	20.617	0	-0.1542
Organic or persistent insomnia	neurological	0.0734	-0.292	0.439	0.186	0.394	1.07616	0.746769	1.55116	50	6481	85	8268	0.693814	0.855878	not_significant	0.0318772	0.158757	1.4339	1.235	1.633	0.101	14.151	0	-0.0499	-0.055	-0.045	0.002	-20.551	0	0.4433	0.307	0.58	0.07	6.353	0	0.2901	0.178	0.402	0.057	5.066	0	1.1261	1.02	1.233	0.054	20.702	0	-0.1538
Orthopnea	respiratory	3.003	0.817	5.189	1.115	2.693	20.1459	2.2637	179.289	10	6521	10	8343	0.00708862	0.0404023	mi_significant	1.30419	2.14944	1.4512	1.252	1.65	0.102	14.293	0	-0.0503	-0.055	-0.046	0.002	-20.689	0	0.4412	0.304	0.578	0.07	6.322	0	0.2886	0.176	0.401	0.057	5.037	0	1.1259	1.019	1.233	0.054	20.695	0	-0.1538
Orthostatic hypotension	circulatory system	0.49	-0.138	1.118	0.32	1.53	1.63232	0.871099	3.05873	19	6512	25	8328	0.126119	0.327183	not_significant	0.212804	0.899218	1.4363	1.238	1.635	0.101	14.176	0	-0.05	-0.055	-0.045	0.002	-20.597	0	0.4439	0.307	0.581	0.07	6.363	0	0.2912	0.179	0.403	0.057	5.084	0	1.1277	1.021	1.234	0.054	20.727	0	-0.1529
Osteitis deformans and osteopathies associated with other disorders classified elsewhere	musculoskeletal	0.9923	-0.59	2.575	0.807	1.229	2.69743	0.554327	13.1313	10	6521	10	8343	0.219119	0.453782	not_significant	0.43095	0.659321	1.4351	1.237	1.634	0.101	14.164	0	-0.0499	-0.055	-0.045	0.002	-20.57	0	0.4428	0.306	0.58	0.07	6.347	0	0.2885	0.176	0.401	0.057	5.037	0	1.1256	1.019	1.232	0.054	20.693	0	-0.1535
Osteoarthritis; localized	musculoskeletal	0.7345	0.217	1.252	0.264	2.781	2.08444	1.24234	3.49733	32	6499	35	8318	0.00542002	0.0331172	mi_significant	0.318989	2.266	1.4476	1.249	1.646	0.101	14.271	0	-0.0503	-0.055	-0.046	0.002	-20.702	0	0.447	0.31	0.584	0.07	6.404	0	0.2937	0.181	0.406	0.057	5.126	0	1.1294	1.023	1.236	0.054	20.751	0	-0.1504
Osteoarthrosis		1.2901	-0.632	3.212	0.981	1.315	3.63315	0.531528	24.8287	10	6521	10	8343	0.188371	0.421787	not_significant	0.560283	0.724986	1.4346	1.236	1.633	0.101	14.163	0	-0.0499	-0.055	-0.045	0.002	-20.576	0	0.443	0.306	0.58	0.07	6.35	0	0.2895	0.177	0.402	0.057	5.055	0	1.1255	1.019	1.232	0.054	20.693	0	-0.1534
Osteoarthrosis involving more than one site, but not specified as generalized	musculoskeletal	0.8851	-1.899	3.669	1.42	0.623	2.42323	0.149718	39.2127	10	6521	10	8343	0.53319	0.756751	not_significant	0.384394	0.273118	1.4331	1.235	1.632	0.101	14.146	0	-0.0499	-0.055	-0.045	0.002	-20.558	0	0.4434	0.307	0.58	0.07	6.355	0	0.2909	0.179	0.403	0.057	5.078	0	1.1265	1.02	1.233	0.054	20.707	0	-0.1527
Osteoarthrosis NOS	musculoskeletal	0.0805	-0.166	0.327	0.126	0.639	1.08383	0.847046	1.3868	112	6419	206	8147	0.52298	0.750039	not_significant	0.0349607	0.281515	1.4387	1.239	1.638	0.102	14.147	0	-0.05	-0.055	-0.045	0.002	-20.463	0	0.4435	0.307	0.58	0.07	6.357	0	0.2905	0.178	0.403	0.057	5.074	0	1.1271	1.02	1.234	0.054	20.707	0	-0.1527
Osteoarthrosis, generalized	musculoskeletal	0.9891	-0.293	2.271	0.654	1.512	2.68881	0.746022	9.68909	10	6521	10	8343	0.13054	0.333564	not_significant	0.429561	0.884255	1.4423	1.243	1.641	0.102	14.207	0	-0.0501	-0.055	-0.045	0.002	-20.6	0	0.4427	0.306	0.579	0.07	6.346	0	0.2898	0.178	0.402	0.057	5.061	0	1.1262	1.02	1.233	0.054	20.704	0	-0.1536
Osteoarthrosis, localized, primary	musculoskeletal	0.0242	-0.177	0.226	0.103	0.235	1.0245	0.83778	1.25358	164	6367	324	8029	0.813871	0.922444	not_significant	0.0105099	0.0894443	1.4358	1.236	1.636	0.102	14.076	0	-0.0499	-0.055	-0.045	0.002	-20.336	0	0.4428	0.306	0.58	0.07	6.348	0	0.2899	0.178	0.402	0.057	5.062	0	1.1263	1.02	1.233	0.054	20.695	0	-0.1534
Osteoarthrosis, localized, secondary	musculoskeletal	-0.1185	-0.67	0.433	0.281	-0.421	0.888252	0.511709	1.54188	21	6510	40	8313	0.673726	0.849781	not_significant	-0.0514639	0.171517	1.4323	1.234	1.631	0.101	14.137	0	-0.0498	-0.055	-0.045	0.002	-20.528	0	0.4423	0.306	0.579	0.07	6.341	0	0.2904	0.178	0.403	0.057	5.07	0	1.1254	1.019	1.232	0.054	20.688	0	-0.1537
Osteochondritis dissecans	musculoskeletal	-0.0049	-1.286	1.276	0.653	-0.007	0.995112	0.276374	3.58228	10	6521	10	8343	0.994017	0.995951	not_significant	-0.00212804	0.0026062	1.433	1.234	1.632	0.101	14.146	0	-0.0498	-0.055	-0.045	0.002	-20.552	0	0.4427	0.306	0.579	0.07	6.346	0	0.2902	0.178	0.402	0.057	5.067	0	1.1258	1.019	1.232	0.054	20.696	0	-0.1534
Osteochondropathies	musculoskeletal	0.4422	-2.357	3.241	1.428	0.31	1.55613	0.0947039	25.5593	10	6521	10	8343	0.756808	0.894522	not_significant	0.192045	0.121014	1.4329	1.234	1.631	0.101	14.145	0	-0.0498	-0.055	-0.045	0.002	-20.552	0	0.4427	0.306	0.579	0.07	6.346	0	0.29	0.178	0.402	0.057	5.064	0	1.1258	1.019	1.232	0.054	20.699	0	-0.1535
Osteopenia or other disorder of bone and cartilage	musculoskeletal	0.3145	-0.012	0.641	0.166	1.89	1.36957	0.988072	1.89838	81	6450	84	8269	0.0587894	0.200392	not_significant	0.136586	1.2307	1.4346	1.236	1.633	0.101	14.162	0	-0.05	-0.055	-0.045	0.002	-20.6	0	0.4432	0.307	0.58	0.07	6.354	0	0.2901	0.178	0.402	0.057	5.066	0	1.1266	1.02	1.233	0.054	20.708	0	-0.1522
Osteoporosis NOS	musculoskeletal	1.4045	0.743	2.066	0.337	4.162	4.07349	2.10223	7.89319	36	6495	14	8339	3.14854e-05	0.000432399	mi_significant	0.609967	4.50189	1.4413	1.243	1.64	0.101	14.215	0	-0.0502	-0.055	-0.045	0.002	-20.671	0	0.4408	0.304	0.578	0.07	6.316	0	0.2907	0.178	0.403	0.057	5.072	0	1.127	1.02	1.234	0.054	20.707	0	-0.151
Otalgia	sense organs	-0.361	-0.63	-0.092	0.137	-2.629	0.696979	0.532592	0.912105	82	6449	191	8162	0.00855689	0.0465624	con_significant	-0.15678	2.06768	1.4335	1.235	1.632	0.101	14.148	0	-0.0497	-0.054	-0.045	0.002	-20.48	0	0.4401	0.303	0.577	0.07	6.307	0	0.2892	0.177	0.402	0.057	5.05	0	1.1222	1.016	1.229	0.054	20.624	0	-0.1509
Other abnormal blood chemistry	symptoms	0.5155	0.393	0.638	0.062	8.275	1.67448	1.48142	1.89269	657	5874	602	7751	1.28817e-16	2.06394e-14	mi_significant	0.223879	15.89	1.4392	1.24	1.638	0.102	14.166	0	-0.0512	-0.056	-0.046	0.002	-20.979	0	0.4618	0.325	0.599	0.07	6.6	0	0.2824	0.17	0.395	0.057	4.92	0	1.1385	1.032	1.245	0.055	20.869	0	-0.1527
Other abnormal glucose	endocrine/metabolic	0.0837	-0.054	0.222	0.07	1.19	1.0873	0.947432	1.24857	381	6150	641	7712	0.233878	0.472144	not_significant	0.0363504	0.631011	1.4377	1.239	1.636	0.101	14.18	0	-0.0501	-0.055	-0.045	0.002	-20.562	0	0.4468	0.31	0.584	0.07	6.396	0	0.2937	0.181	0.406	0.057	5.121	0	1.1302	1.023	1.237	0.055	20.73	0	-0.1553
Other abnormality of urination	genitourinary	0.4161	0.131	0.701	0.146	2.859	1.51604	1.13997	2.01577	101	6430	113	8240	0.00425344	0.0271392	mi_significant	0.18071	2.37126	1.4437	1.245	1.642	0.101	14.238	0	-0.0503	-0.055	-0.046	0.002	-20.682	0	0.4448	0.308	0.582	0.07	6.374	0	0.2916	0.179	0.404	0.057	5.091	0	1.1276	1.021	1.234	0.054	20.724	0	-0.154
Other acquired deformities of limbs	musculoskeletal	-0.0332	-0.893	0.827	0.439	-0.076	0.967345	0.409426	2.28645	10	6521	15	8338	0.939677	0.975394	not_significant	-0.0144186	0.0270212	1.433	1.234	1.632	0.101	14.146	0	-0.0498	-0.055	-0.045	0.002	-20.552	0	0.4427	0.306	0.579	0.07	6.346	0	0.2903	0.178	0.403	0.057	5.068	0	1.1258	1.019	1.232	0.054	20.697	0	-0.1534
Other acquired musculoskeletal deformity	musculoskeletal	0.1108	-0.294	0.516	0.207	0.536	1.11717	0.745276	1.67531	47	6484	55	8298	0.59208	0.795429	not_significant	0.0481198	0.22762	1.4326	1.234	1.631	0.101	14.141	0	-0.0498	-0.055	-0.045	0.002	-20.556	0	0.4423	0.306	0.579	0.07	6.339	0	0.2898	0.178	0.402	0.057	5.061	0	1.1261	1.019	1.233	0.054	20.703	0	-0.153
Other acute and subacute forms of ischemic heart disease	circulatory system	1.2497	-0.277	2.776	0.779	1.605	3.4893	0.758054	16.0547	10	6521	10	8343	0.108588	0.29997	not_significant	0.542738	0.964217	1.4349	1.236	1.633	0.101	14.163	0	-0.0499	-0.055	-0.045	0.002	-20.577	0	0.4438	0.307	0.581	0.07	6.361	0	0.2912	0.179	0.403	0.057	5.085	0	1.1263	1.02	1.233	0.054	20.705	0	-0.1533
Other allied disorders of spine	musculoskeletal	-0.152	-0.788	0.484	0.325	-0.468	0.858988	0.454753	1.62255	15	6516	31	8322	0.639591	0.825571	not_significant	-0.0660128	0.194097	1.4314	1.233	1.63	0.101	14.123	0	-0.0498	-0.055	-0.045	0.002	-20.513	0	0.4428	0.306	0.579	0.07	6.347	0	0.2908	0.179	0.403	0.057	5.077	0	1.1256	1.019	1.232	0.054	20.695	0	-0.1536
Other alveolar and parietoalveolar pneumonopathy	respiratory	0.8809	-0.253	2.014	0.578	1.523	2.41307	0.776468	7.49323	10	6521	10	8343	0.127695	0.329402	not_significant	0.38257	0.893827	1.4331	1.234	1.632	0.101	14.144	0	-0.0499	-0.055	-0.045	0.002	-20.56	0	0.4431	0.306	0.58	0.07	6.351	0	0.2902	0.178	0.402	0.057	5.067	0	1.1264	1.02	1.233	0.054	20.708	0	-0.1531
Other and unspecified coagulation defects	hematopoietic	0.8994	0.118	1.681	0.399	2.255	2.45813	1.12524	5.37092	19	6512	12	8341	0.0241618	0.108203	not_significant	0.390604	1.61687	1.436	1.237	1.635	0.101	14.174	0	-0.0499	-0.055	-0.045	0.002	-20.587	0	0.4428	0.306	0.58	0.07	6.347	0	0.288	0.176	0.4	0.057	5.028	0	1.1252	1.019	1.232	0.054	20.683	0	-0.1546
Other and unspecified congenital anomalies	congenital anomalies	0.9547	0.31	1.599	0.329	2.903	2.59789	1.36343	4.94808	30	6501	15	8338	0.00369071	0.0244359	mi_significant	0.414621	2.43289	1.4264	1.228	1.625	0.101	14.07	0	-0.0497	-0.055	-0.045	0.002	-20.505	0	0.4432	0.306	0.58	0.07	6.352	0	0.2905	0.178	0.403	0.057	5.071	0	1.1274	1.021	1.234	0.054	20.721	0	-0.1536
Other and unspecified disc disorder	musculoskeletal	-0.1513	-0.602	0.299	0.23	-0.658	0.85959	0.547715	1.34851	29	6502	67	8286	0.510306	0.738817	not_significant	-0.0657088	0.292169	1.4308	1.232	1.629	0.101	14.119	0	-0.0498	-0.055	-0.045	0.002	-20.501	0	0.4423	0.306	0.579	0.07	6.34	0	0.2903	0.178	0.402	0.057	5.068	0	1.1253	1.019	1.232	0.054	20.688	0	-0.1528
Other and unspecified disorders of the nervous system	neurological	0.2229	-0.854	1.3	0.549	0.406	1.2497	0.425709	3.6693	10	6521	10	8343	0.684995	0.852993	not_significant	0.0968042	0.164312	1.4337	1.235	1.632	0.101	14.151	0	-0.0499	-0.055	-0.045	0.002	-20.557	0	0.4427	0.306	0.579	0.07	6.345	0	0.2902	0.178	0.402	0.057	5.068	0	1.1257	1.019	1.232	0.054	20.697	0	-0.1534
Other anemias	hematopoietic	0.6036	0.397	0.81	0.105	5.735	1.82869	1.48736	2.24791	226	6305	194	8159	9.74103e-09	3.34442e-07	mi_significant	0.26214	8.0114	1.4391	1.24	1.638	0.101	14.196	0	-0.0506	-0.055	-0.046	0.002	-20.807	0	0.4497	0.313	0.587	0.07	6.438	0	0.2966	0.184	0.409	0.057	5.173	0	1.1363	1.029	1.243	0.054	20.85	0	-0.1469
Other aneurysm	circulatory system	1.1918	-0.605	2.988	0.917	1.3	3.293	0.546074	19.846	10	6521	10	8343	0.193546	0.426812	not_significant	0.517592	0.713216	1.4331	1.235	1.632	0.101	14.145	0	-0.0499	-0.055	-0.045	0.002	-20.56	0	0.4437	0.307	0.58	0.07	6.359	0	0.2912	0.179	0.403	0.057	5.084	0	1.1268	1.02	1.233	0.054	20.714	0	-0.1532
Other arthropathies	musculoskeletal	-0.0597	-1.245	1.126	0.605	-0.099	0.942047	0.287941	3.0833	10	6521	10	8343	0.921329	0.968176	not_significant	-0.0259274	0.0355851	1.4329	1.234	1.631	0.101	14.145	0	-0.0498	-0.055	-0.045	0.002	-20.551	0	0.4428	0.306	0.58	0.07	6.347	0	0.2903	0.178	0.403	0.057	5.069	0	1.1259	1.019	1.232	0.054	20.7	0	-0.1533
Other benign neoplasm of connective and other soft tissue	neoplasms	-0.3252	-1.006	0.356	0.347	-0.936	0.722383	0.365679	1.42761	14	6517	28	8325	0.349238	0.599525	not_significant	-0.141233	0.456878	1.4326	1.234	1.631	0.101	14.14	0	-0.0498	-0.055	-0.045	0.002	-20.533	0	0.442	0.305	0.579	0.07	6.336	0	0.2904	0.178	0.403	0.057	5.07	0	1.1255	1.019	1.232	0.054	20.692	0	-0.1539
Other cardiac conduction disorders	circulatory system	-0.6116	-2.285	1.062	0.854	-0.716	0.542482	0.101774	2.89215	10	6521	10	8343	0.473801	0.708735	not_significant	-0.265615	0.324404	1.433	1.234	1.632	0.101	14.146	0	-0.0498	-0.055	-0.045	0.002	-20.541	0	0.4418	0.305	0.579	0.07	6.332	0	0.2897	0.177	0.402	0.057	5.057	0	1.1251	1.018	1.232	0.054	20.682	0	-0.1543
Other chronic ischemic heart disease, unspecified	circulatory system	1.0947	0.238	1.952	0.437	2.504	2.98829	1.26871	7.04276	12	6519	12	8341	0.0122794	0.0627126	not_significant	0.475422	1.91082	1.4502	1.251	1.649	0.102	14.279	0	-0.0503	-0.055	-0.046	0.002	-20.677	0	0.4428	0.306	0.58	0.07	6.345	0	0.2876	0.175	0.4	0.057	5.02	0	1.1269	1.02	1.234	0.054	20.713	0	-0.1527
Other chronic nonalcoholic liver disease	digestive	0.1944	-0.011	0.4	0.105	1.855	1.21458	0.98906	1.49182	178	6353	235	8118	0.0636648	0.211045	not_significant	0.0844268	1.1961	1.435	1.236	1.634	0.101	14.161	0	-0.05	-0.055	-0.045	0.002	-20.608	0	0.444	0.307	0.581	0.07	6.363	0	0.2891	0.177	0.401	0.057	5.049	0	1.1294	1.023	1.236	0.054	20.747	0	-0.1533
Other CNS infection and poliomyelitis	neurological	1.4636	0.227	2.7	0.631	2.32	4.32149	1.25483	14.8797	10	6521	10	8343	0.020351	0.0934593	not_significant	0.635633	1.69141	1.4367	1.238	1.635	0.101	14.177	0	-0.05	-0.055	-0.045	0.002	-20.599	0	0.4434	0.307	0.58	0.07	6.354	0	0.2914	0.179	0.404	0.057	5.086	0	1.1264	1.02	1.233	0.054	20.705	0	-0.153
Other conditions of brain, NOS	neurological	0.4802	-0.007	0.967	0.248	1.933	1.6164	0.993024	2.63004	41	6490	34	8319	0.0532209	0.190433	not_significant	0.208548	1.27392	1.4307	1.232	1.629	0.101	14.12	0	-0.0498	-0.055	-0.045	0.002	-20.554	0	0.443	0.306	0.58	0.07	6.349	0	0.2907	0.178	0.403	0.057	5.076	0	1.1266	1.02	1.233	0.054	20.709	0	-0.1532
Other congenital anomalies of lower limb, including pelvic girdle	congenital anomalies	-0.6098	-1.673	0.454	0.543	-1.124	0.54346	0.187683	1.5746	10	6521	11	8342	0.261137	0.504096	not_significant	-0.264833	0.583131	1.4342	1.236	1.633	0.101	14.157	0	-0.0498	-0.055	-0.045	0.002	-20.552	0	0.4416	0.305	0.578	0.07	6.329	0	0.2895	0.177	0.402	0.057	5.054	0	1.126	1.019	1.233	0.054	20.7	0	-0.1543
Other congenital musculoskeletal anomalies	congenital anomalies	-0.1201	-1.07	0.83	0.485	-0.248	0.886832	0.343009	2.29332	10	6521	11	8342	0.804232	0.919669	not_significant	-0.0521588	0.0946187	1.4331	1.235	1.632	0.101	14.147	0	-0.0498	-0.055	-0.045	0.002	-20.551	0	0.4426	0.306	0.579	0.07	6.344	0	0.2902	0.178	0.402	0.057	5.067	0	1.1258	1.019	1.232	0.054	20.698	0	-0.1536
Other deficiencies of circulating enzymes	endocrine/metabolic	1.2623	-1.163	3.688	1.238	1.02	3.53354	0.312547	39.9648	10	6521	10	8343	0.3077	0.553246	not_significant	0.54821	0.511872	1.4347	1.236	1.633	0.101	14.159	0	-0.0499	-0.055	-0.045	0.002	-20.564	0	0.4409	0.304	0.578	0.07	6.317	0	0.2897	0.177	0.402	0.057	5.059	0	1.1259	1.019	1.233	0.054	20.7	0	-0.1533
Other demyelinating diseases of central nervous system	neurological	1.0407	-0.684	2.766	0.88	1.183	2.8312	0.504595	15.8949	10	6521	10	8343	0.236998	0.47334	not_significant	0.45197	0.625255	1.4329	1.234	1.631	0.101	14.143	0	-0.0499	-0.055	-0.045	0.002	-20.557	0	0.4436	0.307	0.58	0.07	6.358	0	0.291	0.179	0.403	0.057	5.082	0	1.1261	1.02	1.233	0.054	20.703	0	-0.153
Other derangement of joint	musculoskeletal	-0.4432	-0.7	-0.186	0.131	-3.378	0.641979	0.496585	0.830274	92	6439	208	8145	0.000729827	0.00653671	con_significant	-0.192479	3.13678	1.4319	1.233	1.63	0.101	14.132	0	-0.0496	-0.054	-0.045	0.002	-20.449	0	0.4389	0.302	0.576	0.07	6.289	0	0.2935	0.181	0.406	0.057	5.122	0	1.1242	1.018	1.231	0.054	20.663	0	-0.1522
Other diseases of blood and blood-forming organs	hematopoietic	1.0767	0.569	1.584	0.259	4.158	2.93498	1.7665	4.87441	50	6481	25	8328	3.20892e-05	0.000436534	mi_significant	0.467605	4.49364	1.4287	1.23	1.627	0.101	14.092	0	-0.0498	-0.055	-0.045	0.002	-20.51	0	0.444	0.307	0.581	0.07	6.364	0	0.289	0.177	0.401	0.057	5.045	0	1.1241	1.017	1.231	0.054	20.659	0	-0.1617
Other diseases of lung	respiratory	0.5454	0.193	0.898	0.18	3.034	1.7253	1.21288	2.45469	70	6461	73	8280	0.00241692	0.0177816	mi_significant	0.236864	2.61674	1.4423	1.244	1.641	0.101	14.236	0	-0.0502	-0.055	-0.045	0.002	-20.677	0	0.4418	0.305	0.579	0.07	6.331	0	0.2885	0.176	0.401	0.057	5.036	0	1.1276	1.021	1.234	0.054	20.722	0	-0.1554
Other diseases of respiratory system, NEC	respiratory	-0.5777	-0.972	-0.183	0.201	-2.869	0.561188	0.378326	0.832768	37	6494	99	8254	0.0041231	0.0266615	con_significant	-0.250892	2.38478	1.4378	1.239	1.637	0.101	14.183	0	-0.0498	-0.055	-0.045	0.002	-20.528	0	0.439	0.302	0.576	0.07	6.291	0	0.2881	0.176	0.4	0.057	5.028	0	1.1223	1.016	1.229	0.054	20.628	0	-0.1535
Other diseases of respiratory system, not elsewhere classified	respiratory	-0.6748	-2.269	0.919	0.813	-0.83	0.509258	0.103416	2.50678	10	6521	10	8343	0.406726	0.65751	not_significant	-0.293062	0.390698	1.4336	1.235	1.632	0.101	14.152	0	-0.0498	-0.055	-0.045	0.002	-20.553	0	0.4421	0.305	0.579	0.07	6.337	0	0.2898	0.178	0.402	0.057	5.061	0	1.1252	1.019	1.232	0.054	20.685	0	-0.1534
Other diseases of the teeth and supporting structures	digestive	0.5487	-0.127	1.225	0.345	1.591	1.731	0.880734	3.40417	19	6512	18	8335	0.111673	0.302692	not_significant	0.238297	0.952053	1.4332	1.235	1.632	0.101	14.144	0	-0.0499	-0.055	-0.045	0.002	-20.575	0	0.4452	0.308	0.582	0.07	6.379	0	0.2911	0.179	0.403	0.057	5.082	0	1.128	1.021	1.235	0.054	20.73	0	-0.1513
Other disorders of arteries and arterioles	circulatory system	1.3306	0.494	2.167	0.427	3.116	3.78331	1.63886	8.73205	17	6514	10	8343	0.00183076	0.0138945	mi_significant	0.577872	2.73737	1.4455	1.247	1.644	0.101	14.256	0	-0.0502	-0.055	-0.045	0.002	-20.683	0	0.4448	0.308	0.582	0.07	6.375	0	0.2883	0.176	0.401	0.057	5.032	0	1.1272	1.021	1.234	0.054	20.717	0	-0.1524
Other disorders of biliary tract	digestive	1.4936	0.409	2.578	0.553	2.7	4.4531	1.50531	13.1708	12	6519	10	8343	0.00694021	0.0398716	mi_significant	0.648662	2.15863	1.4387	1.24	1.637	0.101	14.191	0	-0.0501	-0.055	-0.045	0.002	-20.62	0	0.4435	0.307	0.58	0.07	6.356	0	0.2902	0.178	0.403	0.057	5.067	0	1.1281	1.021	1.235	0.054	20.731	0	-0.1509
Other disorders of bladder	genitourinary	0.9812	0.467	1.496	0.263	3.737	2.66766	1.5952	4.4638	37	6494	30	8323	0.000186221	0.00193187	mi_significant	0.42613	3.72997	1.4501	1.251	1.649	0.101	14.303	0	-0.0504	-0.055	-0.046	0.002	-20.747	0	0.4425	0.306	0.579	0.07	6.342	0	0.2859	0.174	0.398	0.057	4.99	0	1.1304	1.024	1.237	0.054	20.765	0	-0.1519
Other disorders of bone and cartilage	musculoskeletal	0.029	-0.245	0.303	0.14	0.208	1.02942	0.782705	1.35391	96	6435	145	8208	0.835304	0.927863	not_significant	0.0125945	0.0781556	1.4333	1.235	1.632	0.101	14.147	0	-0.0498	-0.055	-0.045	0.002	-20.548	0	0.4428	0.306	0.58	0.07	6.348	0	0.29	0.178	0.402	0.057	5.064	0	1.1259	1.019	1.233	0.054	20.7	0	-0.1535
Other disorders of carbohydrate transport and metabolism	endocrine/metabolic	0.4269	-0.682	1.536	0.566	0.754	1.5325	0.505605	4.64597	10	6521	10	8343	0.450554	0.689289	not_significant	0.1854	0.346254	1.4323	1.234	1.631	0.101	14.138	0	-0.0498	-0.055	-0.045	0.002	-20.553	0	0.4435	0.307	0.58	0.07	6.357	0	0.2907	0.178	0.403	0.057	5.075	0	1.1266	1.02	1.233	0.054	20.71	0	-0.1532
Other disorders of cervical region	musculoskeletal	-0.0758	-0.812	0.66	0.376	-0.202	0.927002	0.443969	1.93479	13	6518	21	8332	0.840059	0.929825	not_significant	-0.0329195	0.07569	1.4327	1.234	1.631	0.101	14.141	0	-0.0498	-0.055	-0.045	0.002	-20.545	0	0.4427	0.306	0.579	0.07	6.346	0	0.2905	0.178	0.403	0.057	5.071	0	1.126	1.019	1.233	0.054	20.7	0	-0.1532
Other disorders of circulatory system	circulatory system	1.7031	0.337	3.069	0.697	2.444	5.49094	1.40074	21.5204	11	6520	10	8343	0.0145216	0.071225	not_significant	0.739647	1.83799	1.4329	1.234	1.631	0.101	14.144	0	-0.0499	-0.055	-0.045	0.002	-20.563	0	0.444	0.307	0.581	0.07	6.364	0	0.2879	0.176	0.4	0.057	5.024	0	1.1263	1.02	1.233	0.054	20.702	0	-0.1531
Other disorders of ear	sense organs	-0.3478	-0.706	0.011	0.183	-1.901	0.70624	0.493615	1.01106	46	6485	106	8247	0.0573616	0.198669	not_significant	-0.151048	1.24138	1.4313	1.233	1.63	0.101	14.13	0	-0.0497	-0.054	-0.045	0.002	-20.489	0	0.4414	0.305	0.578	0.07	6.326	0	0.2898	0.178	0.402	0.057	5.059	0	1.1239	1.017	1.231	0.054	20.659	0	-0.1529
Other disorders of eye	sense organs	-0.185	-0.672	0.302	0.249	-0.744	0.831104	0.510686	1.35256	26	6505	55	8298	0.456753	0.694033	not_significant	-0.0803445	0.340319	1.4325	1.234	1.631	0.101	14.14	0	-0.0498	-0.055	-0.045	0.002	-20.523	0	0.4416	0.305	0.578	0.07	6.329	0	0.2894	0.177	0.402	0.057	5.053	0	1.1248	1.018	1.231	0.054	20.673	0	-0.1537
Other disorders of eyelids	sense organs	-0.4976	-0.968	-0.027	0.24	-2.074	0.607988	0.379842	0.973361	24	6507	78	8275	0.038061	0.151196	not_significant	-0.216105	1.41952	1.4284	1.23	1.627	0.101	14.095	0	-0.0496	-0.054	-0.045	0.002	-20.428	0	0.4391	0.302	0.576	0.07	6.292	0	0.2878	0.175	0.4	0.057	5.023	0	1.1215	1.015	1.228	0.054	20.604	0	-0.1549
Other disorders of gallbladder	digestive	1.0329	0.148	1.918	0.452	2.287	2.8092	1.15951	6.80733	13	6518	10	8343	0.0221773	0.101523	not_significant	0.448583	1.65409	1.4345	1.236	1.633	0.101	14.158	0	-0.05	-0.055	-0.045	0.002	-20.601	0	0.4437	0.307	0.58	0.07	6.358	0	0.2932	0.181	0.405	0.057	5.117	0	1.1298	1.023	1.236	0.054	20.756	0	-0.15
Other disorders of intestine	digestive	0.2304	-0.151	0.612	0.195	1.183	1.2591	0.859848	1.84412	54	6477	65	8288	0.236751	0.47334	not_significant	0.100061	0.625708	1.434	1.235	1.633	0.101	14.154	0	-0.0499	-0.055	-0.045	0.002	-20.572	0	0.4437	0.307	0.58	0.07	6.36	0	0.2892	0.177	0.401	0.057	5.05	0	1.1264	1.02	1.233	0.054	20.708	0	-0.1533
Other disorders of lipoid metabolism	endocrine/metabolic	-0.584	-1.41	0.242	0.421	-1.386	0.557663	0.244143	1.27379	10	6521	21	8332	0.165721	0.385549	not_significant	-0.253628	0.780623	1.4323	1.234	1.631	0.101	14.139	0	-0.0498	-0.055	-0.045	0.002	-20.544	0	0.443	0.306	0.58	0.07	6.351	0	0.2919	0.18	0.404	0.057	5.095	0	1.1269	1.02	1.234	0.054	20.716	0	-0.1523
Other disorders of liver	digestive	0.2868	-0.03	0.603	0.161	1.777	1.33216	0.970446	1.82759	77	6454	93	8260	0.0756489	0.237143	not_significant	0.124556	1.1212	1.4348	1.236	1.633	0.101	14.159	0	-0.05	-0.055	-0.045	0.002	-20.591	0	0.4429	0.306	0.58	0.07	6.348	0	0.2897	0.177	0.402	0.057	5.058	0	1.1275	1.021	1.234	0.054	20.725	0	-0.1539
Other disorders of male genital organs	genitourinary	0.1364	0.028	0.245	0.055	2.471	1.14614	1.0284	1.27762	752	5779	882	7471	0.0134768	0.066782	not_significant	0.0592378	1.87041	1.4167	1.218	1.616	0.102	13.957	0	-0.0498	-0.055	-0.045	0.002	-20.538	0	0.4437	0.307	0.58	0.07	6.36	0	0.2903	0.178	0.403	0.057	5.068	0	1.1271	1.02	1.234	0.054	20.717	0	-0.1558
Other disorders of metabolism	endocrine/metabolic	0.2122	-0.051	0.476	0.134	1.578	1.2364	0.950279	1.60962	112	6419	140	8213	0.114489	0.307967	not_significant	0.0921573	0.941235	1.4331	1.234	1.632	0.101	14.145	0	-0.0499	-0.055	-0.045	0.002	-20.561	0	0.4408	0.304	0.578	0.07	6.318	0	0.2878	0.176	0.4	0.057	5.024	0	1.1248	1.018	1.231	0.054	20.677	0	-0.1586
Other disorders of middle ear and mastoid	sense organs	-0.4684	-1.679	0.742	0.618	-0.758	0.626003	0.18656	2.10013	10	6521	10	8343	0.448327	0.689289	not_significant	-0.203424	0.348406	1.4337	1.235	1.632	0.101	14.152	0	-0.0498	-0.055	-0.045	0.002	-20.553	0	0.4424	0.306	0.579	0.07	6.341	0	0.2906	0.178	0.403	0.057	5.073	0	1.1253	1.019	1.232	0.054	20.687	0	-0.1541
Other disorders of neurohypophysis	endocrine/metabolic	1.3607	-0.266	2.988	0.83	1.639	3.89892	0.766439	19.846	10	6521	10	8343	0.101218	0.286752	not_significant	0.590945	0.994741	1.4334	1.235	1.632	0.101	14.148	0	-0.0498	-0.055	-0.045	0.002	-20.553	0	0.4427	0.306	0.579	0.07	6.346	0	0.2897	0.177	0.402	0.057	5.058	0	1.1248	1.018	1.231	0.054	20.679	0	-0.1546
Other disorders of peritoneum	digestive	0.6438	-0.616	1.904	0.643	1.001	1.9037	0.540101	6.71269	10	6521	10	8343	0.316663	0.562706	not_significant	0.279599	0.499402	1.4356	1.237	1.634	0.101	14.165	0	-0.0499	-0.055	-0.045	0.002	-20.572	0	0.4432	0.306	0.58	0.07	6.352	0	0.2894	0.177	0.402	0.057	5.054	0	1.1262	1.02	1.233	0.054	20.705	0	-0.1533
Other disorders of prostate	genitourinary	0.4912	-0.352	1.335	0.43	1.141	1.63428	0.70328	3.8	11	6520	12	8341	0.25368	0.497059	not_significant	0.213325	0.595713	1.4348	1.236	1.633	0.101	14.161	0	-0.0499	-0.055	-0.045	0.002	-20.571	0	0.4432	0.306	0.58	0.07	6.352	0	0.2898	0.178	0.402	0.057	5.06	0	1.1263	1.02	1.233	0.054	20.705	0	-0.1533
Other disorders of soft tissues	musculoskeletal	-0.2763	-0.541	-0.011	0.135	-2.045	0.758585	0.582166	0.98906	93	6438	184	8169	0.0408579	0.155999	not_significant	-0.119996	1.38872	1.4308	1.232	1.629	0.101	14.12	0	-0.0497	-0.054	-0.045	0.002	-20.46	0	0.4401	0.303	0.577	0.07	6.307	0	0.2916	0.179	0.404	0.057	5.091	0	1.1246	1.018	1.231	0.054	20.674	0	-0.1531
Other disorders of stomach and duodenum	digestive	0.698	0.278	1.118	0.215	3.254	2.00973	1.32049	3.05873	50	6481	46	8307	0.00113876	0.00922525	mi_significant	0.303138	2.94357	1.4433	1.245	1.642	0.101	14.233	0	-0.0502	-0.055	-0.045	0.002	-20.676	0	0.4428	0.306	0.58	0.07	6.345	0	0.2891	0.177	0.401	0.057	5.046	0	1.1294	1.023	1.236	0.054	20.753	0	-0.1525
Other disorders of synovium, tendon, and bursa	musculoskeletal	-0.2288	-0.586	0.128	0.182	-1.257	0.795488	0.556549	1.13655	47	6484	106	8247	0.208741	0.445005	not_significant	-0.0993666	0.680392	1.4291	1.23	1.628	0.101	14.102	0	-0.0497	-0.054	-0.045	0.002	-20.457	0	0.4411	0.304	0.578	0.07	6.323	0	0.2908	0.179	0.403	0.057	5.078	0	1.1241	1.017	1.231	0.054	20.661	0	-0.1536
Other disorders of testis	genitourinary	2.221	1.628	2.814	0.303	7.339	9.21654	5.09368	16.6765	71	6460	14	8339	2.1542e-13	1.82727e-11	mi_significant	0.964568	12.6667	1.4318	1.233	1.631	0.102	14.091	0	-0.0501	-0.055	-0.045	0.002	-20.601	0	0.4399	0.303	0.577	0.07	6.288	0	0.2954	0.183	0.408	0.057	5.148	0	1.1352	1.028	1.242	0.054	20.837	0	-0.1597
Other disorders of the kidney and ureters	genitourinary	0.7663	0.432	1.1	0.171	4.493	2.15179	1.54034	3.00417	81	6450	75	8278	7.00707e-06	0.000118873	mi_significant	0.3328	5.15446	1.4569	1.258	1.656	0.101	14.362	0	-0.0506	-0.055	-0.046	0.002	-20.826	0	0.4395	0.303	0.576	0.07	6.295	0	0.2874	0.175	0.4	0.057	5.015	0	1.1311	1.024	1.238	0.054	20.777	0	-0.1544
Other disorders of thyroid	endocrine/metabolic	0.6184	-0.045	1.282	0.338	1.828	1.85596	0.955997	3.60384	19	6512	19	8334	0.06761	0.221576	not_significant	0.268568	1.16999	1.4369	1.238	1.636	0.101	14.18	0	-0.05	-0.055	-0.045	0.002	-20.6	0	0.4439	0.307	0.581	0.07	6.363	0	0.2897	0.177	0.402	0.057	5.058	0	1.127	1.02	1.234	0.054	20.717	0	-0.1531
Other disorders of tympanic membrane	sense organs	0.7486	-0.273	1.771	0.521	1.436	2.11404	0.761093	5.87673	10	6521	10	8343	0.151116	0.364396	not_significant	0.325113	0.820691	1.4324	1.234	1.631	0.101	14.138	0	-0.0499	-0.055	-0.045	0.002	-20.561	0	0.4434	0.307	0.58	0.07	6.355	0	0.2911	0.179	0.403	0.057	5.082	0	1.1274	1.021	1.234	0.054	20.722	0	-0.1522
Other disorders of urethra and urinary tract	genitourinary	0.3565	-0.506	1.219	0.44	0.81	1.42832	0.602902	3.3838	13	6518	11	8342	0.417909	0.667639	not_significant	0.154826	0.378918	1.4318	1.233	1.63	0.101	14.133	0	-0.0498	-0.055	-0.045	0.002	-20.546	0	0.4427	0.306	0.579	0.07	6.345	0	0.2901	0.178	0.402	0.057	5.066	0	1.1258	1.019	1.232	0.054	20.698	0	-0.1535
Other dyschromia	dermatologic	-0.6752	-0.851	-0.499	0.09	-7.528	0.509055	0.426988	0.607137	193	6338	516	7837	5.15948e-14	5.31427e-12	con_significant	-0.293236	13.2874	1.4112	1.213	1.61	0.101	13.923	0	-0.0488	-0.054	-0.044	0.002	-20.095	0	0.4372	0.3	0.574	0.07	6.263	0	0.3036	0.191	0.416	0.057	5.289	0	1.1381	1.031	1.245	0.055	20.873	0	-0.1386
Other dyspnea	respiratory	-0.0604	-0.211	0.091	0.077	-0.784	0.941388	0.809774	1.09527	305	6226	526	7827	0.433047	0.679493	not_significant	-0.0262314	0.363465	1.4323	1.234	1.631	0.101	14.138	0	-0.0497	-0.054	-0.045	0.002	-20.461	0	0.441	0.304	0.578	0.07	6.319	0	0.2902	0.178	0.402	0.057	5.068	0	1.1231	1.016	1.23	0.054	20.609	0	-0.1538
Other endocrine disorders	endocrine/metabolic	1.0102	0.631	1.389	0.193	5.221	2.74615	1.87949	4.01084	88	6443	45	8308	1.77697e-07	4.57571e-06	mi_significant	0.438724	6.75032	1.4329	1.234	1.632	0.101	14.13	0	-0.05	-0.055	-0.045	0.002	-20.612	0	0.4457	0.309	0.583	0.07	6.384	0	0.288	0.176	0.4	0.057	5.025	0	1.1257	1.019	1.232	0.054	20.679	0	-0.1543
Other forms of chronic heart disease	circulatory system	0.9287	0.206	1.651	0.369	2.518	2.53122	1.22875	5.21219	20	6511	15	8338	0.0117921	0.0609471	not_significant	0.403329	1.92841	1.4384	1.24	1.637	0.101	14.197	0	-0.05	-0.055	-0.045	0.002	-20.626	0	0.4432	0.306	0.58	0.07	6.351	0	0.2894	0.177	0.402	0.057	5.052	0	1.1274	1.021	1.234	0.054	20.722	0	-0.1525
Other headache syndromes	neurological	0.0229	-0.152	0.198	0.089	0.257	1.02316	0.858988	1.21896	247	6284	344	8009	0.797381	0.916083	not_significant	0.00994534	0.0983343	1.4319	1.233	1.631	0.101	14.124	0	-0.0498	-0.055	-0.045	0.002	-20.554	0	0.4433	0.306	0.58	0.07	6.351	0	0.2906	0.178	0.403	0.057	5.072	0	1.1265	1.02	1.233	0.054	20.689	0	-0.1532
Other heart block	circulatory system	0.3586	-2.229	2.947	1.32	0.272	1.43132	0.107636	19.0487	10	6521	10	8343	0.785968	0.909727	not_significant	0.155738	0.104595	1.4336	1.235	1.632	0.101	14.148	0	-0.0498	-0.055	-0.045	0.002	-20.553	0	0.4427	0.306	0.579	0.07	6.347	0	0.2902	0.178	0.402	0.057	5.068	0	1.1257	1.019	1.232	0.054	20.697	0	-0.1535
Other hemoglobinopathies	hematopoietic	-0.0078	-0.525	0.509	0.264	-0.03	0.99223	0.591555	1.66363	29	6502	37	8316	0.976393	0.987936	not_significant	-0.0033875	0.0103753	1.433	1.234	1.632	0.101	14.145	0	-0.0498	-0.055	-0.045	0.002	-20.553	0	0.4428	0.306	0.579	0.07	6.346	0	0.2902	0.178	0.402	0.057	5.067	0	1.1258	1.019	1.232	0.054	20.699	0	-0.1534
Other hereditary hemolytic anemias	hematopoietic	1.157	-0.597	2.911	0.895	1.293	3.18038	0.550461	18.3752	10	6521	10	8343	0.19617	0.429904	not_significant	0.502479	0.707368	1.4328	1.234	1.631	0.101	14.143	0	-0.0498	-0.055	-0.045	0.002	-20.55	0	0.4419	0.305	0.579	0.07	6.334	0	0.2893	0.177	0.402	0.057	5.052	0	1.1258	1.019	1.232	0.054	20.699	0	-0.1542
Other high-risk pregnancy	pregnancy complications	0.9675	-1.545	3.48	1.282	0.755	2.63136	0.213312	32.4597	10	6521	10	8343	0.450431	0.689289	not_significant	0.42018	0.346371	1.4327	1.234	1.631	0.101	14.143	0	-0.0498	-0.055	-0.045	0.002	-20.549	0	0.4427	0.306	0.579	0.07	6.346	0	0.2902	0.178	0.402	0.057	5.068	0	1.1256	1.019	1.232	0.054	20.695	0	-0.1538
Other hypertensive complications	circulatory system	0.9254	0.544	1.307	0.195	4.752	2.52288	1.72288	3.69507	73	6458	51	8302	2.01543e-06	3.82904e-05	mi_significant	0.401896	5.69563	1.4459	1.247	1.645	0.101	14.26	0	-0.0503	-0.055	-0.046	0.002	-20.725	0	0.4418	0.305	0.579	0.07	6.327	0	0.2894	0.177	0.402	0.057	5.05	0	1.1282	1.021	1.235	0.054	20.726	0	-0.1562
Other hypertrophic and atrophic conditions of skin	dermatologic	-0.3889	-0.612	-0.166	0.114	-3.418	0.677802	0.542265	0.847046	123	6408	280	8073	0.000631787	0.00577436	con_significant	-0.168897	3.19943	1.4321	1.234	1.631	0.101	14.137	0	-0.0495	-0.054	-0.045	0.002	-20.39	0	0.4367	0.3	0.573	0.07	6.256	0	0.2865	0.174	0.399	0.057	4.999	0	1.1187	1.012	1.225	0.054	20.548	0	-0.156
Other hypertrophic cardiomyopathy	circulatory system	-0.9368	-2.617	0.744	0.857	-1.093	0.39188	0.0730216	2.10434	10	6521	10	8343	0.274542	0.514877	not_significant	-0.406847	0.561392	1.4321	1.234	1.631	0.101	14.136	0	-0.0498	-0.055	-0.045	0.002	-20.542	0	0.4434	0.307	0.58	0.07	6.356	0	0.2905	0.178	0.403	0.057	5.073	0	1.1267	1.02	1.233	0.054	20.712	0	-0.1531
Other ill-defined and unknown causes of morbidity and mortality		0.188	-0.297	0.673	0.248	0.759	1.20683	0.743044	1.96011	33	6498	39	8314	0.447607	0.689289	not_significant	0.0816474	0.349103	1.4328	1.234	1.631	0.101	14.144	0	-0.0498	-0.055	-0.045	0.002	-20.556	0	0.4423	0.306	0.579	0.07	6.34	0	0.2897	0.177	0.402	0.057	5.058	0	1.1258	1.019	1.232	0.054	20.698	0	-0.1539
Other immunological findings	endocrine/metabolic	0.2337	-0.097	0.565	0.169	1.383	1.26327	0.907556	1.75945	74	6457	83	8270	0.166615	0.38689	not_significant	0.101495	0.778287	1.4298	1.231	1.628	0.101	14.11	0	-0.0499	-0.055	-0.045	0.002	-20.561	0	0.4448	0.308	0.582	0.07	6.374	0	0.2927	0.18	0.405	0.057	5.108	0	1.128	1.021	1.235	0.054	20.729	0	-0.1516
Other infectious and parasitic diseases	infectious diseases	0.4821	0.207	0.757	0.14	3.435	1.61947	1.22998	2.13187	125	6406	110	8243	0.000592978	0.00562548	mi_significant	0.209373	3.22696	1.4329	1.234	1.631	0.101	14.143	0	-0.05	-0.055	-0.045	0.002	-20.616	0	0.4419	0.305	0.579	0.07	6.332	0	0.2892	0.177	0.401	0.057	5.048	0	1.1267	1.02	1.233	0.054	20.704	0	-0.1539
Other inflammatory disorders of male genital organs	genitourinary	-0.0999	-0.735	0.535	0.324	-0.308	0.904928	0.479505	1.70745	17	6514	29	8324	0.757952	0.89514	not_significant	-0.043386	0.120358	1.4328	1.234	1.631	0.101	14.144	0	-0.0498	-0.055	-0.045	0.002	-20.544	0	0.4425	0.306	0.579	0.07	6.344	0	0.2901	0.178	0.402	0.057	5.066	0	1.1258	1.019	1.232	0.054	20.698	0	-0.1534
Other inflammatory spondylopathies	musculoskeletal	-1.2878	-2.592	0.017	0.666	-1.935	0.275877	0.0748701	1.01715	10	6521	12	8341	0.0530232	0.190198	not_significant	-0.559284	1.27553	1.4334	1.235	1.632	0.101	14.149	0	-0.0498	-0.055	-0.045	0.002	-20.552	0	0.4442	0.307	0.581	0.07	6.366	0	0.291	0.179	0.403	0.057	5.081	0	1.1271	1.02	1.234	0.054	20.718	0	-0.1528
Other intestinal obstruction	digestive	0.2954	-0.285	0.876	0.296	0.998	1.34366	0.752014	2.40128	24	6507	29	8324	0.318178	0.56386	not_significant	0.128291	0.49733	1.4357	1.237	1.634	0.101	14.168	0	-0.0499	-0.055	-0.045	0.002	-20.576	0	0.4417	0.305	0.578	0.07	6.332	0	0.2893	0.177	0.402	0.057	5.051	0	1.1258	1.019	1.232	0.054	20.698	0	-0.1534
Other local infections of skin and subcutaneous tissue	dermatologic	0.1679	-0.143	0.479	0.159	1.059	1.18282	0.866754	1.61446	75	6456	106	8247	0.289512	0.529121	not_significant	0.072918	0.538334	1.4339	1.235	1.632	0.101	14.154	0	-0.0499	-0.055	-0.045	0.002	-20.573	0	0.4426	0.306	0.579	0.07	6.345	0	0.2893	0.177	0.402	0.057	5.05	0	1.1267	1.02	1.233	0.054	20.712	0	-0.1546
Other mental disorder	mental disorders	0.05	-0.545	0.645	0.304	0.165	1.05127	0.579842	1.90599	22	6509	25	8328	0.869288	0.942491	not_significant	0.0217147	0.0608365	1.4325	1.234	1.631	0.101	14.136	0	-0.0498	-0.055	-0.045	0.002	-20.546	0	0.4427	0.306	0.579	0.07	6.345	0	0.2901	0.178	0.402	0.057	5.066	0	1.1259	1.019	1.233	0.054	20.7	0	-0.1533
Other non-epithelial cancer of skin	neoplasms	-0.2175	-0.585	0.15	0.187	-1.16	0.804528	0.557106	1.16183	45	6486	106	8247	0.245958	0.486518	not_significant	-0.094459	0.609139	1.4255	1.227	1.624	0.101	14.044	0	-0.0496	-0.054	-0.045	0.002	-20.384	0	0.4417	0.305	0.578	0.07	6.332	0	0.2905	0.178	0.403	0.057	5.073	0	1.1255	1.019	1.232	0.054	20.692	0	-0.153
Other nondiabetic retinopathy	sense organs	0.4249	-0.678	1.528	0.563	0.755	1.52944	0.507631	4.60895	10	6521	10	8343	0.450137	0.689289	not_significant	0.184532	0.346655	1.4346	1.236	1.633	0.101	14.158	0	-0.0499	-0.055	-0.045	0.002	-20.564	0	0.4429	0.306	0.58	0.07	6.349	0	0.2897	0.178	0.402	0.057	5.059	0	1.1256	1.019	1.232	0.054	20.694	0	-0.1537
Other nonspecific findings on examination of urine	genitourinary	0.251	-0.113	0.615	0.186	1.353	1.28531	0.893151	1.84966	61	6470	72	8281	0.176094	0.401785	not_significant	0.109008	0.754255	1.432	1.233	1.631	0.101	14.134	0	-0.0499	-0.055	-0.045	0.002	-20.565	0	0.4435	0.307	0.58	0.07	6.357	0	0.29	0.178	0.402	0.057	5.065	0	1.1273	1.021	1.234	0.054	20.72	0	-0.1534
Other nutritional deficiency	endocrine/metabolic	0.6611	0.297	1.025	0.186	3.563	1.93692	1.34582	2.7871	75	6456	57	8296	0.000366338	0.00371134	mi_significant	0.287112	3.43612	1.4373	1.239	1.636	0.101	14.182	0	-0.05	-0.055	-0.045	0.002	-20.602	0	0.4364	0.3	0.573	0.07	6.25	0	0.2846	0.172	0.397	0.057	4.966	0	1.1232	1.017	1.23	0.054	20.643	0	-0.1594
Other open wound of head and face	injuries & poisonings	-0.1821	-0.642	0.277	0.234	-0.777	0.833518	0.526239	1.31917	30	6501	57	8296	0.437119	0.68291	not_significant	-0.079085	0.3594	1.4326	1.234	1.631	0.101	14.142	0	-0.0498	-0.055	-0.045	0.002	-20.536	0	0.4428	0.306	0.58	0.07	6.348	0	0.2904	0.178	0.403	0.057	5.07	0	1.1254	1.019	1.232	0.054	20.689	0	-0.1531
Other paralytic syndromes	neurological	2.29	1.301	3.279	0.504	4.54	9.87494	3.67297	26.5492	30	6501	10	8343	5.62178e-06	9.767e-05	mi_significant	0.994534	5.25013	1.4336	1.235	1.632	0.101	14.132	0	-0.05	-0.055	-0.045	0.002	-20.608	0	0.4457	0.309	0.583	0.07	6.385	0	0.2943	0.182	0.407	0.057	5.132	0	1.1307	1.024	1.237	0.054	20.76	0	-0.1499
Other peripheral nerve disorders	neurological	-0.0713	-0.281	0.138	0.107	-0.668	0.931182	0.755028	1.14798	155	6376	273	8080	0.504033	0.733417	not_significant	-0.0309652	0.297541	1.4318	1.233	1.63	0.101	14.131	0	-0.0497	-0.054	-0.045	0.002	-20.475	0	0.4412	0.304	0.578	0.07	6.321	0	0.2897	0.177	0.402	0.057	5.058	0	1.1244	1.018	1.231	0.054	20.656	0	-0.1538
Other persistent mental disorders due to conditions classified elsewhere	mental disorders	0.2256	-0.935	1.386	0.592	0.381	1.25307	0.392586	3.99882	10	6521	10	8343	0.703128	0.863637	not_significant	0.0979768	0.152966	1.433	1.235	1.632	0.101	14.148	0	-0.0498	-0.055	-0.045	0.002	-20.558	0	0.4427	0.306	0.579	0.07	6.346	0	0.2901	0.178	0.402	0.057	5.067	0	1.1261	1.02	1.233	0.054	20.702	0	-0.1532
Other pulmonary inflamation or edema	respiratory	1.904	0.593	3.215	0.669	2.847	6.71269	1.80941	24.9033	12	6519	10	8343	0.00440928	0.027974	mi_significant	0.826897	2.35563	1.4302	1.232	1.629	0.101	14.11	0	-0.0499	-0.055	-0.045	0.002	-20.57	0	0.4467	0.31	0.583	0.07	6.399	0	0.2947	0.182	0.407	0.057	5.142	0	1.1302	1.023	1.237	0.054	20.762	0	-0.1494
Other retinal disorders	sense organs	-0.4814	-1.418	0.455	0.478	-1.008	0.617918	0.242198	1.57617	10	6521	19	8334	0.313538	0.560161	not_significant	-0.209069	0.50371	1.4309	1.232	1.629	0.101	14.123	0	-0.0498	-0.055	-0.045	0.002	-20.512	0	0.4434	0.307	0.58	0.07	6.355	0	0.2896	0.177	0.402	0.057	5.056	0	1.1251	1.018	1.232	0.054	20.683	0	-0.1536
Other signs and symptoms in breast	genitourinary	0.1335	-1.394	1.661	0.779	0.171	1.14282	0.248081	5.26457	10	6521	10	8343	0.86403	0.939674	not_significant	0.0579783	0.063471	1.433	1.234	1.632	0.101	14.146	0	-0.0498	-0.055	-0.045	0.002	-20.553	0	0.4428	0.306	0.579	0.07	6.347	0	0.2901	0.178	0.402	0.057	5.066	0	1.1258	1.019	1.232	0.054	20.699	0	-0.1534
Other signs and symptoms involving emotional state		0.1634	-0.324	0.651	0.249	0.657	1.17751	0.72325	1.91746	34	6497	38	8315	0.511009	0.739092	not_significant	0.0709637	0.291572	1.4332	1.235	1.632	0.101	14.148	0	-0.0499	-0.055	-0.045	0.002	-20.559	0	0.4428	0.306	0.58	0.07	6.348	0	0.2897	0.177	0.402	0.057	5.058	0	1.1256	1.019	1.232	0.054	20.694	0	-0.1535
Other specified cardiac dysrhythmias	circulatory system	-0.0144	-0.295	0.267	0.143	-0.1	0.985703	0.744532	1.30604	87	6444	144	8209	0.920065	0.968005	not_significant	-0.00625384	0.0361815	1.4328	1.234	1.631	0.101	14.142	0	-0.0498	-0.055	-0.045	0.002	-20.527	0	0.4426	0.306	0.579	0.07	6.343	0	0.2902	0.178	0.402	0.057	5.068	0	1.1257	1.019	1.232	0.054	20.694	0	-0.1534
Other specified congenital anomalies of kidney	congenital anomalies	0.7598	-0.021	1.54	0.398	1.908	2.13785	0.979219	4.66459	17	6514	12	8341	0.0563992	0.197741	not_significant	0.329977	1.24873	1.4315	1.233	1.63	0.101	14.128	0	-0.0498	-0.055	-0.045	0.002	-20.551	0	0.4421	0.305	0.579	0.07	6.336	0	0.291	0.179	0.403	0.057	5.081	0	1.1269	1.02	1.234	0.054	20.715	0	-0.1536
Other specified congenital anomalies of nervous system	congenital anomalies	0.3234	-1.125	1.772	0.739	0.438	1.38182	0.324652	5.88261	10	6521	10	8343	0.661651	0.841359	not_significant	0.140451	0.179371	1.4321	1.234	1.631	0.101	14.135	0	-0.0498	-0.055	-0.045	0.002	-20.547	0	0.4428	0.306	0.58	0.07	6.348	0	0.2903	0.178	0.403	0.057	5.069	0	1.1261	1.019	1.233	0.054	20.702	0	-0.153
Other specified diffuse diseases of connective tissue	dermatologic	1.2718	-0.441	2.984	0.874	1.455	3.56727	0.643393	19.7667	10	6521	10	8343	0.145537	0.355703	not_significant	0.552336	0.837025	1.4331	1.235	1.632	0.101	14.146	0	-0.0498	-0.055	-0.045	0.002	-20.556	0	0.4423	0.306	0.579	0.07	6.34	0	0.2902	0.178	0.402	0.057	5.067	0	1.1264	1.02	1.233	0.054	20.708	0	-0.1537
Other specified diseases of hair and hair follicles	dermatologic	-0.2202	-0.431	-0.009	0.108	-2.047	0.802358	0.649859	0.99104	147	6384	277	8076	0.0406901	0.155999	not_significant	-0.0956316	1.39051	1.4339	1.235	1.632	0.101	14.153	0	-0.0497	-0.054	-0.045	0.002	-20.483	0	0.4382	0.301	0.575	0.07	6.279	0	0.2896	0.177	0.402	0.057	5.056	0	1.1233	1.017	1.23	0.054	20.646	0	-0.1526
Other specified diseases of sebaceous glands	dermatologic	-0.3676	-0.708	-0.027	0.174	-2.116	0.692394	0.492628	0.973361	55	6476	113	8240	0.0343076	0.143396	not_significant	-0.159647	1.46461	1.4287	1.23	1.627	0.101	14.099	0	-0.0496	-0.054	-0.045	0.002	-20.444	0	0.4396	0.303	0.576	0.07	6.301	0	0.2918	0.18	0.404	0.057	5.094	0	1.1254	1.019	1.232	0.054	20.689	0	-0.1549
Other specified diseases of the salivary glands	digestive	-0.4631	-2.163	1.236	0.867	-0.534	0.62933	0.11498	3.44182	10	6521	10	8343	0.593319	0.795429	not_significant	-0.201122	0.226711	1.4331	1.235	1.632	0.101	14.147	0	-0.0498	-0.055	-0.045	0.002	-20.549	0	0.4423	0.306	0.579	0.07	6.339	0	0.2899	0.178	0.402	0.057	5.062	0	1.1255	1.019	1.232	0.054	20.692	0	-0.1537
Other specified disorders involving the immune mechanism	endocrine/metabolic	1.9134	-0.301	4.128	1.13	1.693	6.77609	0.740078	62.0537	10	6521	10	8343	0.0903628	0.268645	not_significant	0.830979	1.04401	1.4339	1.235	1.633	0.101	14.151	0	-0.0499	-0.055	-0.045	0.002	-20.562	0	0.4408	0.304	0.578	0.07	6.316	0	0.2909	0.179	0.403	0.057	5.08	0	1.126	1.019	1.233	0.054	20.699	0	-0.153
Other specified disorders of breast	genitourinary	1.354	-1.119	3.827	1.262	1.073	3.87289	0.326606	45.9246	10	6521	10	8343	0.283259	0.521659	not_significant	0.588035	0.547817	1.4331	1.235	1.632	0.101	14.146	0	-0.0498	-0.055	-0.045	0.002	-20.557	0	0.4433	0.307	0.58	0.07	6.354	0	0.2903	0.178	0.403	0.057	5.068	0	1.1264	1.02	1.233	0.054	20.708	0	-0.1531
Other specified disorders of plasma protein metabolism	endocrine/metabolic	1.1854	0.348	2.023	0.427	2.773	3.272	1.41623	7.56097	21	6510	10	8343	0.00555295	0.0333169	mi_significant	0.514813	2.25548	1.4347	1.236	1.633	0.101	14.164	0	-0.0499	-0.055	-0.045	0.002	-20.591	0	0.4408	0.304	0.578	0.07	6.318	0	0.2907	0.178	0.403	0.057	5.075	0	1.1252	1.019	1.232	0.054	20.682	0	-0.1535
Other specified erythematous conditions	dermatologic	0.3942	-0.157	0.946	0.281	1.401	1.4832	0.854704	2.57539	25	6506	31	8322	0.16135	0.381421	not_significant	0.171199	0.79223	1.433	1.235	1.632	0.101	14.147	0	-0.0499	-0.055	-0.045	0.002	-20.578	0	0.4444	0.308	0.581	0.07	6.369	0	0.2916	0.179	0.404	0.057	5.091	0	1.1281	1.021	1.235	0.054	20.729	0	-0.1526
Other specified gastritis	digestive	0.09	-0.664	0.844	0.384	0.234	1.09417	0.514788	2.32565	12	6519	19	8334	0.814975	0.922444	not_significant	0.0390865	0.0888559	1.433	1.234	1.632	0.101	14.145	0	-0.0498	-0.055	-0.045	0.002	-20.553	0	0.443	0.306	0.58	0.07	6.35	0	0.2905	0.178	0.403	0.057	5.072	0	1.1261	1.019	1.233	0.054	20.699	0	-0.1532
Other specified osteoporosis		0.1412	-1.59	1.872	0.883	0.16	1.15165	0.203926	6.50129	10	6521	10	8343	0.873007	0.943686	not_significant	0.0613224	0.0589821	1.4328	1.234	1.631	0.101	14.143	0	-0.0498	-0.055	-0.045	0.002	-20.55	0	0.4428	0.306	0.579	0.07	6.347	0	0.2903	0.178	0.402	0.057	5.068	0	1.1257	1.019	1.232	0.054	20.694	0	-0.1533
Other specified peripheral vascular diseases	circulatory system	0.6983	-1.82	3.216	1.285	0.543	2.01033	0.162026	24.9282	10	6521	10	8343	0.586792	0.793765	not_significant	0.303268	0.231516	1.4342	1.236	1.633	0.101	14.155	0	-0.0499	-0.055	-0.045	0.002	-20.561	0	0.4428	0.306	0.579	0.07	6.347	0	0.2901	0.178	0.402	0.057	5.065	0	1.1259	1.019	1.232	0.054	20.7	0	-0.1536
Other sprains and strains		-0.296	-0.68	0.088	0.196	-1.511	0.743787	0.506617	1.09199	41	6490	86	8267	0.130712	0.333564	not_significant	-0.128551	0.883685	1.4335	1.235	1.632	0.101	14.152	0	-0.0497	-0.055	-0.045	0.002	-20.516	0	0.4399	0.303	0.577	0.07	6.304	0	0.2895	0.177	0.402	0.057	5.054	0	1.1233	1.017	1.23	0.054	20.643	0	-0.1549
Other symptoms		-0.1641	-0.336	0.007	0.088	-1.875	0.848657	0.714623	1.00702	234	6297	421	7932	0.0608327	0.203659	not_significant	-0.0712677	1.21586	1.4322	1.234	1.631	0.101	14.135	0	-0.0497	-0.054	-0.045	0.002	-20.502	0	0.4445	0.308	0.581	0.07	6.371	0	0.2935	0.181	0.406	0.057	5.121	0	1.1272	1.021	1.234	0.054	20.721	0	-0.1449
Other symptoms involving abdomen and pelvis	digestive	0.2817	-0.103	0.667	0.196	1.434	1.32538	0.902127	1.94838	52	6479	64	8289	0.151574	0.36489	not_significant	0.122341	0.819377	1.4357	1.237	1.634	0.101	14.171	0	-0.05	-0.055	-0.045	0.002	-20.591	0	0.4439	0.307	0.581	0.07	6.362	0	0.2887	0.176	0.401	0.057	5.04	0	1.1266	1.02	1.233	0.054	20.71	0	-0.1537
Other symptoms involving urinary system	genitourinary	0.34	0.075	0.605	0.135	2.512	1.40495	1.07788	1.83125	113	6418	136	8217	0.0119913	0.0615352	not_significant	0.14766	1.92114	1.4429	1.244	1.642	0.101	14.227	0	-0.0503	-0.055	-0.045	0.002	-20.669	0	0.4468	0.31	0.584	0.07	6.401	0	0.2891	0.177	0.401	0.057	5.048	0	1.1291	1.022	1.236	0.054	20.747	0	-0.1513
Other symptoms referable to back	musculoskeletal	-0.2227	-0.556	0.111	0.17	-1.309	0.800355	0.573498	1.11739	54	6477	117	8236	0.190417	0.425049	not_significant	-0.0967174	0.720293	1.4337	1.235	1.632	0.101	14.153	0	-0.0497	-0.054	-0.045	0.002	-20.509	0	0.4393	0.303	0.576	0.07	6.294	0	0.2885	0.176	0.401	0.057	5.037	0	1.1223	1.016	1.229	0.054	20.61	0	-0.1547
Other symptoms/disorders or the urinary system	genitourinary	0.3133	-0.088	0.714	0.205	1.531	1.36793	0.915761	2.04214	51	6480	56	8297	0.125735	0.327183	not_significant	0.136064	0.900543	1.433	1.234	1.632	0.101	14.146	0	-0.0499	-0.055	-0.045	0.002	-20.579	0	0.4431	0.306	0.58	0.07	6.351	0	0.2898	0.178	0.402	0.057	5.061	0	1.1274	1.021	1.234	0.054	20.722	0	-0.1525
Other tests		-0.2024	-0.274	-0.13	0.037	-5.512	0.816768	0.760332	0.878095	3349	3182	5288	3065	3.55747e-08	1.11519e-06	con_significant	-0.0879012	7.44886	1.5252	1.324	1.727	0.103	14.845	0	-0.049	-0.054	-0.044	0.002	-20.173	0	0.3801	0.242	0.519	0.071	5.375	0	0.2882	0.176	0.401	0.057	5.025	0	1.077	0.969	1.185	0.055	19.543	0	-0.1306
Other unspecified back disorders	musculoskeletal	-0.4423	-1.226	0.341	0.4	-1.107	0.642557	0.293464	1.40635	10	6521	21	8332	0.268444	0.510681	not_significant	-0.192088	0.571146	1.4311	1.233	1.63	0.101	14.126	0	-0.0498	-0.055	-0.045	0.002	-20.528	0	0.4435	0.307	0.58	0.07	6.357	0	0.293	0.181	0.405	0.057	5.111	0	1.1264	1.02	1.233	0.054	20.708	0	-0.1532
Other upper respiratory disease	respiratory	-0.3734	-0.523	-0.223	0.077	-4.875	0.68839	0.59274	0.800115	281	6250	627	7726	1.08625e-06	2.2701e-05	con_significant	-0.162166	5.96407	1.4397	1.241	1.638	0.101	14.206	0	-0.0494	-0.054	-0.045	0.002	-20.349	0	0.4303	0.293	0.567	0.07	6.161	0	0.2881	0.176	0.4	0.057	5.026	0	1.1124	1.006	1.219	0.054	20.416	0	-0.1494
Other venous embolism and thrombosis	circulatory system	0.5813	0.209	0.953	0.19	3.062	1.78836	1.23244	2.59348	68	6463	58	8295	0.00219903	0.0165156	mi_significant	0.252455	2.65777	1.438	1.239	1.637	0.101	14.188	0	-0.0501	-0.055	-0.045	0.002	-20.633	0	0.4439	0.307	0.581	0.07	6.362	0	0.2887	0.176	0.401	0.057	5.039	0	1.1264	1.02	1.233	0.054	20.701	0	-0.1539
Other vitamin B12 deficiency anemia	hematopoietic	-0.4164	-2.721	1.888	1.176	-0.354	0.659416	0.0658089	6.60614	10	6521	10	8343	0.723239	0.877133	not_significant	-0.18084	0.140718	1.4329	1.234	1.631	0.101	14.145	0	-0.0498	-0.055	-0.045	0.002	-20.55	0	0.4426	0.306	0.579	0.07	6.344	0	0.2902	0.178	0.402	0.057	5.068	0	1.1257	1.019	1.232	0.054	20.696	0	-0.1534
Otitis externa	sense organs	-0.7536	-1.05	-0.457	0.151	-4.987	0.470669	0.349938	0.63318	61	6470	202	8151	6.14538e-07	1.34267e-05	con_significant	-0.327284	6.21145	1.4271	1.228	1.626	0.101	14.083	0	-0.0493	-0.054	-0.045	0.002	-20.314	0	0.4361	0.299	0.573	0.07	6.246	0	0.2877	0.175	0.4	0.057	5.019	0	1.1181	1.011	1.225	0.054	20.533	0	-0.1561
Otitis media	sense organs	-0.6507	-1.043	-0.258	0.2	-3.249	0.52168	0.352396	0.772595	35	6496	110	8243	0.00115692	0.00931999	con_significant	-0.282595	2.9367	1.4341	1.236	1.633	0.101	14.157	0	-0.0496	-0.054	-0.045	0.002	-20.461	0	0.434	0.297	0.571	0.07	6.217	0	0.2862	0.174	0.399	0.057	4.994	0	1.1193	1.013	1.226	0.054	20.559	0	-0.1562
Otorrhea	sense organs	0.4593	-0.482	1.401	0.48	0.956	1.58297	0.617547	4.05926	10	6521	10	8343	0.338833	0.589508	not_significant	0.199471	0.470014	1.4334	1.235	1.632	0.101	14.149	0	-0.0499	-0.055	-0.045	0.002	-20.56	0	0.4425	0.306	0.579	0.07	6.344	0	0.2904	0.178	0.403	0.057	5.071	0	1.1262	1.02	1.233	0.054	20.704	0	-0.1537
Otosclerosis	sense organs	-0.8724	-3.029	1.284	1.1	-0.793	0.417947	0.048364	3.61106	10	6521	10	8343	0.427766	0.674878	not_significant	-0.378879	0.368794	1.433	1.234	1.632	0.101	14.146	0	-0.0498	-0.055	-0.045	0.002	-20.55	0	0.4424	0.306	0.579	0.07	6.342	0	0.2899	0.178	0.402	0.057	5.063	0	1.1256	1.019	1.232	0.054	20.694	0	-0.1529
Overweight, obesity and other hyperalimentation	endocrine/metabolic	0.0199	-0.141	0.181	0.082	0.242	1.0201	0.868489	1.19842	279	6252	423	7930	0.80844	0.919705	not_significant	0.00864246	0.0923523	1.4331	1.235	1.632	0.101	14.147	0	-0.0499	-0.055	-0.045	0.002	-20.542	0	0.4428	0.306	0.58	0.07	6.348	0	0.2898	0.178	0.402	0.057	5.06	0	1.1263	1.02	1.233	0.054	20.695	0	-0.1535
Pain and other symptoms associated with female genital organs	genitourinary	-1.018	-2.449	0.413	0.73	-1.394	0.361317	0.0863799	1.51135	10	6521	10	8343	0.163308	0.384788	not_significant	-0.442112	0.786992	1.4322	1.234	1.631	0.101	14.136	0	-0.0498	-0.055	-0.045	0.002	-20.541	0	0.4431	0.306	0.58	0.07	6.351	0	0.2906	0.178	0.403	0.057	5.074	0	1.128	1.021	1.235	0.054	20.729	0	-0.1534
Pain in joint	musculoskeletal	-0.2787	-0.367	-0.19	0.045	-6.175	0.756767	0.69281	0.826959	1015	5516	1934	6419	6.6257e-10	3.08202e-08	con_significant	-0.121038	9.17877	1.4435	1.245	1.642	0.101	14.24	0	-0.0483	-0.053	-0.043	0.002	-19.807	0	0.3951	0.257	0.533	0.07	5.627	0	0.2666	0.154	0.379	0.057	4.638	0	1.0918	0.985	1.199	0.055	19.959	0	-0.1638
Pain in limb	symptoms	-0.2471	-0.356	-0.138	0.056	-4.446	0.781063	0.700473	0.871099	602	5929	1190	7163	8.74184e-06	0.000143247	con_significant	-0.107314	5.0584	1.4371	1.238	1.636	0.101	14.179	0	-0.049	-0.054	-0.044	0.002	-20.138	0	0.4171	0.28	0.554	0.07	5.958	0	0.2767	0.164	0.389	0.057	4.822	0	1.1056	0.999	1.213	0.055	20.253	0	-0.1541
Pain, swelling or discharge of eye	sense organs	-0.004	-0.361	0.353	0.182	-0.022	0.996008	0.696979	1.42333	54	6477	86	8267	0.982392	0.99133	not_significant	-0.00173718	0.00771499	1.433	1.234	1.632	0.101	14.145	0	-0.0498	-0.055	-0.045	0.002	-20.543	0	0.4427	0.306	0.579	0.07	6.345	0	0.2902	0.178	0.402	0.057	5.067	0	1.1258	1.019	1.232	0.054	20.695	0	-0.1534
Painful respiration	respiratory	-0.283	-0.547	-0.019	0.135	-2.099	0.75352	0.578683	0.981179	91	6440	187	8166	0.0358067	0.146749	not_significant	-0.122905	1.44604	1.4357	1.237	1.634	0.101	14.171	0	-0.0497	-0.054	-0.045	0.002	-20.511	0	0.4375	0.301	0.574	0.07	6.268	0	0.2884	0.176	0.401	0.057	5.034	0	1.1223	1.016	1.229	0.054	20.623	0	-0.1532
Palindromic rheumatism	musculoskeletal	1.0011	-1.415	3.417	1.233	0.812	2.72127	0.242926	30.4778	10	6521	10	8343	0.416734	0.667338	not_significant	0.434772	0.380141	1.4328	1.234	1.631	0.101	14.144	0	-0.0498	-0.055	-0.045	0.002	-20.554	0	0.4416	0.305	0.578	0.07	6.328	0	0.2906	0.178	0.403	0.057	5.074	0	1.1262	1.02	1.233	0.054	20.705	0	-0.153
Pallor and flushing	symptoms	0.0087	-1.047	1.065	0.539	0.016	1.00874	0.350989	2.90084	10	6521	11	8342	0.987177	0.992684	not_significant	0.00377836	0.0056049	1.433	1.234	1.632	0.101	14.144	0	-0.0498	-0.055	-0.045	0.002	-20.548	0	0.4427	0.306	0.579	0.07	6.346	0	0.2902	0.178	0.402	0.057	5.068	0	1.1258	1.019	1.232	0.054	20.699	0	-0.1534
Palpitations	circulatory system	-0.247	-0.441	-0.053	0.099	-2.49	0.781141	0.643393	0.94838	176	6355	323	8030	0.0127772	0.0644222	not_significant	-0.107271	1.89356	1.4355	1.237	1.634	0.101	14.169	0	-0.0496	-0.054	-0.045	0.002	-20.47	0	0.4375	0.301	0.574	0.07	6.268	0	0.2875	0.175	0.4	0.057	5.018	0	1.123	1.016	1.23	0.054	20.639	0	-0.1539
Pancreatic cancer	neoplasms	1.825	0.084	3.566	0.888	2.054	6.2028	1.08763	35.3748	10	6521	10	8343	0.0399382	0.154812	not_significant	0.792587	1.39861	1.4436	1.245	1.642	0.101	14.228	0	-0.0501	-0.055	-0.045	0.002	-20.63	0	0.4411	0.304	0.578	0.07	6.322	0	0.2911	0.179	0.403	0.057	5.082	0	1.1261	1.019	1.233	0.054	20.7	0	-0.1526
Pancytopenia	hematopoietic	2.0099	1.231	2.789	0.398	5.055	7.46257	3.42465	16.2647	53	6478	10	8343	4.30985e-07	1.00239e-05	mi_significant	0.872888	6.36554	1.421	1.222	1.62	0.101	14.005	0	-0.0496	-0.054	-0.045	0.002	-20.409	0	0.4397	0.303	0.576	0.07	6.301	0	0.2832	0.171	0.396	0.057	4.94	0	1.1211	1.014	1.228	0.054	20.596	0	-0.1585
Panniculitis	musculoskeletal	-0.1119	-2.534	2.31	1.236	-0.091	0.894134	0.079341	10.0744	10	6521	10	8343	0.927855	0.972507	not_significant	-0.0485976	0.03252	1.433	1.234	1.632	0.101	14.146	0	-0.0498	-0.055	-0.045	0.002	-20.551	0	0.4426	0.306	0.579	0.07	6.345	0	0.2902	0.178	0.402	0.057	5.067	0	1.1258	1.019	1.232	0.054	20.695	0	-0.1535
Papanicolaou smear of cervix or vagina with atypical squamous cells	genitourinary	1.1934	-1.294	3.681	1.269	0.94	3.29828	0.274172	39.6861	10	6521	10	8343	0.34697	0.597767	not_significant	0.518287	0.459708	1.4348	1.236	1.633	0.101	14.16	0	-0.0499	-0.055	-0.045	0.002	-20.565	0	0.4428	0.306	0.58	0.07	6.347	0	0.2893	0.177	0.402	0.057	5.052	0	1.1256	1.019	1.232	0.054	20.694	0	-0.1533
Paralysis/spasm of vocal cords or larynx	respiratory	0.8751	-0.132	1.882	0.514	1.703	2.39912	0.876341	6.56662	10	6521	10	8343	0.0884842	0.26569	not_significant	0.380051	1.05313	1.4349	1.236	1.633	0.101	14.16	0	-0.0499	-0.055	-0.045	0.002	-20.574	0	0.4431	0.306	0.58	0.07	6.352	0	0.2906	0.178	0.403	0.057	5.074	0	1.1265	1.02	1.233	0.054	20.709	0	-0.1538
Paralytic ileus	digestive	0.627	-0.185	1.439	0.414	1.513	1.87199	0.831104	4.21648	18	6513	10	8343	0.130363	0.333564	not_significant	0.272303	0.884846	1.4314	1.233	1.63	0.101	14.13	0	-0.0498	-0.055	-0.045	0.002	-20.547	0	0.4422	0.305	0.579	0.07	6.339	0	0.2892	0.177	0.401	0.057	5.05	0	1.1252	1.019	1.232	0.054	20.685	0	-0.1529
Paralytic strabismus	sense organs	-0.2142	-1.278	0.849	0.543	-0.395	0.807187	0.278594	2.33731	10	6521	11	8342	0.69307	0.855878	not_significant	-0.0930259	0.159223	1.4329	1.234	1.631	0.101	14.145	0	-0.0498	-0.055	-0.045	0.002	-20.546	0	0.4429	0.306	0.58	0.07	6.348	0	0.2901	0.178	0.402	0.057	5.065	0	1.1255	1.019	1.232	0.054	20.692	0	-0.1536
Paranoid disorders	mental disorders	0.9884	-0.418	2.395	0.718	1.377	2.68693	0.658362	10.9682	10	6521	10	8343	0.168419	0.388576	not_significant	0.429257	0.773609	1.4319	1.233	1.63	0.101	14.134	0	-0.0498	-0.055	-0.045	0.002	-20.548	0	0.4435	0.307	0.58	0.07	6.357	0	0.2894	0.177	0.402	0.057	5.053	0	1.1264	1.02	1.233	0.054	20.707	0	-0.1531
Paraproteinemia	endocrine/metabolic	-0.2692	-1.4	0.862	0.577	-0.466	0.76399	0.246597	2.36789	10	6521	11	8342	0.640925	0.825571	not_significant	-0.116912	0.193193	1.4321	1.234	1.631	0.101	14.134	0	-0.0498	-0.055	-0.045	0.002	-20.537	0	0.443	0.306	0.58	0.07	6.35	0	0.2904	0.178	0.403	0.057	5.071	0	1.1259	1.019	1.233	0.054	20.701	0	-0.1532
Parasomnia	neurological	0.019	-0.64	0.678	0.336	0.057	1.01918	0.527292	1.96993	17	6514	23	8330	0.954939	0.982184	not_significant	0.0082516	0.0200246	1.4329	1.234	1.631	0.101	14.142	0	-0.0498	-0.055	-0.045	0.002	-20.552	0	0.4427	0.306	0.579	0.07	6.346	0	0.2902	0.178	0.402	0.057	5.068	0	1.1259	1.019	1.232	0.054	20.698	0	-0.1534
Parkinson's disease	neurological	2.2462	-0.544	5.037	1.424	1.578	9.45175	0.580422	154.007	10	6521	10	8343	0.114635	0.307967	not_significant	0.975512	0.940683	1.4405	1.242	1.639	0.101	14.203	0	-0.05	-0.055	-0.045	0.002	-20.603	0	0.4416	0.305	0.578	0.07	6.329	0	0.2897	0.177	0.402	0.057	5.059	0	1.1262	1.02	1.233	0.054	20.703	0	-0.1531
Paroxysmal supraventricular tachycardia	circulatory system	0.112	-0.438	0.662	0.281	0.399	1.11851	0.645326	1.93867	24	6507	34	8319	0.689844	0.854906	not_significant	0.048641	0.161249	1.4334	1.235	1.632	0.101	14.15	0	-0.0499	-0.055	-0.045	0.002	-20.557	0	0.4429	0.306	0.58	0.07	6.348	0	0.2903	0.178	0.403	0.057	5.07	0	1.1257	1.019	1.232	0.054	20.696	0	-0.1537
Paroxysmal tachycardia, unspecified	circulatory system	0.4034	-1.1	1.907	0.767	0.526	1.49691	0.332871	6.73286	10	6521	10	8343	0.599011	0.799364	not_significant	0.175194	0.222565	1.4332	1.235	1.632	0.101	14.147	0	-0.0498	-0.055	-0.045	0.002	-20.554	0	0.4424	0.306	0.579	0.07	6.342	0	0.2902	0.178	0.402	0.057	5.068	0	1.1258	1.019	1.232	0.054	20.699	0	-0.1539
Paroxysmal ventricular tachycardia	circulatory system	0.5829	-0.192	1.358	0.396	1.474	1.79123	0.825307	3.88841	14	6517	14	8339	0.140543	0.348218	not_significant	0.25315	0.852191	1.4366	1.238	1.635	0.101	14.177	0	-0.05	-0.055	-0.045	0.002	-20.591	0	0.4427	0.306	0.579	0.07	6.346	0	0.2898	0.178	0.402	0.057	5.06	0	1.1263	1.02	1.233	0.054	20.706	0	-0.153
Partial epilepsy	neurological	0.1255	-0.448	0.699	0.293	0.429	1.13372	0.638905	2.01174	28	6503	23	8330	0.668104	0.847323	not_significant	0.054504	0.175156	1.4319	1.233	1.631	0.101	14.131	0	-0.0498	-0.055	-0.045	0.002	-20.541	0	0.4423	0.306	0.579	0.07	6.34	0	0.29	0.178	0.402	0.057	5.063	0	1.1254	1.019	1.232	0.054	20.688	0	-0.1534
Pathologic fracture	musculoskeletal	1.2379	0.128	2.348	0.566	2.186	3.44836	1.13655	10.4646	10	6521	10	8343	0.0288221	0.124435	not_significant	0.537613	1.54027	1.4367	1.238	1.635	0.101	14.18	0	-0.05	-0.055	-0.045	0.002	-20.606	0	0.4443	0.308	0.581	0.07	6.368	0	0.2924	0.18	0.405	0.057	5.105	0	1.1275	1.021	1.234	0.054	20.722	0	-0.152
Pathologic fracture of femur		0.4978	-2.715	3.711	1.639	0.304	1.6451	0.066205	40.8947	10	6521	10	8343	0.761356	0.895666	not_significant	0.216192	0.118412	1.4333	1.235	1.632	0.101	14.148	0	-0.0498	-0.055	-0.045	0.002	-20.555	0	0.4427	0.306	0.579	0.07	6.346	0	0.2902	0.178	0.402	0.057	5.068	0	1.1257	1.019	1.232	0.054	20.697	0	-0.1534
Pathologic fracture of vertebrae	musculoskeletal	0.7023	-0.406	1.811	0.565	1.242	2.01839	0.66631	6.11656	10	6521	10	8343	0.214267	0.450881	not_significant	0.305005	0.669045	1.434	1.235	1.633	0.101	14.154	0	-0.0499	-0.055	-0.045	0.002	-20.563	0	0.4415	0.305	0.578	0.07	6.328	0	0.2894	0.177	0.402	0.057	5.052	0	1.1248	1.018	1.231	0.054	20.678	0	-0.153
Pathological, developmental or recurrent dislocation	musculoskeletal	-0.0696	-1.014	0.875	0.482	-0.144	0.932767	0.362765	2.39888	10	6521	11	8342	0.885117	0.951782	not_significant	-0.0302269	0.0529992	1.4331	1.235	1.632	0.101	14.146	0	-0.0498	-0.055	-0.045	0.002	-20.552	0	0.4426	0.306	0.579	0.07	6.343	0	0.2901	0.178	0.402	0.057	5.066	0	1.1258	1.019	1.232	0.054	20.698	0	-0.1535
Pectus and other congenital anomalies of ribs/sternum	congenital anomalies	-0.5928	-2.323	1.137	0.883	-0.672	0.552777	0.0979792	3.1174	10	6521	10	8343	0.501756	0.73158	not_significant	-0.25745	0.299507	1.4341	1.236	1.633	0.101	14.154	0	-0.0499	-0.055	-0.045	0.002	-20.557	0	0.4423	0.306	0.579	0.07	6.34	0	0.2902	0.178	0.402	0.057	5.068	0	1.1254	1.019	1.232	0.054	20.691	0	-0.1535
Pectus carinatum	congenital anomalies	0.0141	-2.766	2.794	1.419	0.01	1.0142	0.0629132	16.3463	10	6521	10	8343	0.992063	0.995519	not_significant	0.00612355	0.00346059	1.433	1.234	1.632	0.101	14.141	0	-0.0498	-0.055	-0.045	0.002	-20.548	0	0.4427	0.306	0.579	0.07	6.346	0	0.2902	0.178	0.402	0.057	5.067	0	1.1258	1.019	1.232	0.054	20.699	0	-0.1534
Pectus excavatum	congenital anomalies	-0.3761	-1.58	0.828	0.614	-0.612	0.686534	0.205975	2.28874	10	6521	10	8343	0.540353	0.763529	not_significant	-0.163338	0.267323	1.4337	1.235	1.632	0.101	14.152	0	-0.0498	-0.055	-0.045	0.002	-20.556	0	0.4425	0.306	0.579	0.07	6.342	0	0.2905	0.178	0.403	0.057	5.073	0	1.1256	1.019	1.232	0.054	20.694	0	-0.1531
Peptic ulcer, site unspecified	digestive	0.3051	-0.324	0.934	0.321	0.951	1.35676	0.72325	2.54467	20	6511	22	8331	0.341625	0.591385	not_significant	0.132503	0.46645	1.4316	1.233	1.63	0.101	14.132	0	-0.0498	-0.055	-0.045	0.002	-20.553	0	0.4436	0.307	0.58	0.07	6.359	0	0.2905	0.178	0.403	0.057	5.073	0	1.1267	1.02	1.233	0.054	20.711	0	-0.1531
Perforation of tympanic membrane	sense organs	0.2659	-0.36	0.891	0.319	0.833	1.3046	0.697676	2.43757	21	6510	23	8330	0.404759	0.656538	not_significant	0.115479	0.392804	1.4316	1.233	1.63	0.101	14.131	0	-0.0498	-0.055	-0.045	0.002	-20.555	0	0.4438	0.307	0.581	0.07	6.361	0	0.2911	0.179	0.403	0.057	5.082	0	1.1268	1.02	1.233	0.054	20.71	0	-0.1526
Periapical abscess	digestive	1.386	0.333	2.439	0.537	2.58	3.99882	1.39515	11.4616	11	6520	10	8343	0.0098817	0.0525809	not_significant	0.601932	2.00517	1.437	1.238	1.636	0.101	14.181	0	-0.05	-0.055	-0.045	0.002	-20.597	0	0.4439	0.307	0.581	0.07	6.363	0	0.2889	0.177	0.401	0.057	5.043	0	1.1268	1.02	1.233	0.054	20.714	0	-0.1546
Pericarditis	circulatory system	0.499	-0.219	1.217	0.366	1.362	1.64707	0.803322	3.37704	19	6512	14	8339	0.173337	0.398013	not_significant	0.216713	0.761109	1.4294	1.231	1.628	0.101	14.106	0	-0.0498	-0.055	-0.045	0.002	-20.527	0	0.4429	0.306	0.58	0.07	6.348	0	0.2904	0.178	0.403	0.057	5.07	0	1.1263	1.02	1.233	0.054	20.707	0	-0.1533
Peripheral enthesopathies and allied syndromes	musculoskeletal	-0.3618	-0.543	-0.181	0.092	-3.919	0.696422	0.581003	0.834435	186	6345	452	7901	8.87398e-05	0.00103196	con_significant	-0.157128	4.05188	1.4182	1.22	1.617	0.101	13.994	0	-0.0489	-0.054	-0.044	0.002	-20.087	0	0.4265	0.29	0.564	0.07	6.104	0	0.2838	0.171	0.396	0.057	4.95	0	1.112	1.005	1.219	0.055	20.398	0	-0.16
Peripheral or central vertigo	sense organs	-0.1581	-0.606	0.289	0.228	-0.692	0.853764	0.545529	1.33509	30	6501	66	8287	0.488662	0.721239	not_significant	-0.068662	0.310992	1.432	1.233	1.631	0.101	14.134	0	-0.0498	-0.055	-0.045	0.002	-20.513	0	0.442	0.305	0.579	0.07	6.335	0	0.2896	0.177	0.402	0.057	5.057	0	1.1247	1.018	1.231	0.054	20.67	0	-0.1535
Peripheral retinal degenerations	sense organs	-0.7708	-1.691	0.149	0.469	-1.642	0.462643	0.184335	1.16067	10	6521	23	8330	0.10054	0.286448	not_significant	-0.334754	0.997661	1.4294	1.231	1.628	0.101	14.107	0	-0.0497	-0.054	-0.045	0.002	-20.484	0	0.4443	0.307	0.581	0.07	6.366	0	0.2891	0.177	0.401	0.057	5.048	0	1.1245	1.018	1.231	0.054	20.671	0	-0.1545
Peripheral vascular disease, unspecified	circulatory system	0.4178	-0.614	1.449	0.526	0.794	1.51862	0.541182	4.25885	10	6521	10	8343	0.427363	0.674878	not_significant	0.181448	0.369203	1.4353	1.237	1.634	0.101	14.164	0	-0.0499	-0.055	-0.045	0.002	-20.569	0	0.4428	0.306	0.58	0.07	6.347	0	0.2896	0.177	0.402	0.057	5.056	0	1.126	1.019	1.233	0.054	20.701	0	-0.1533
Peritoneal adhesions (postoperative) (postinfection)	digestive	0.045	-0.824	0.914	0.443	0.101	1.04603	0.438673	2.49428	10	6521	16	8337	0.919231	0.968005	not_significant	0.0195433	0.0365753	1.4332	1.235	1.632	0.101	14.144	0	-0.0498	-0.055	-0.045	0.002	-20.548	0	0.4426	0.306	0.579	0.07	6.344	0	0.2901	0.178	0.402	0.057	5.066	0	1.1258	1.019	1.232	0.054	20.698	0	-0.1534
Peritoneal or intestinal adhesions	digestive	0.1006	-1.822	2.023	0.981	0.103	1.10583	0.161702	7.56097	10	6521	10	8343	0.918291	0.968005	not_significant	0.04369	0.0370195	1.4332	1.235	1.632	0.101	14.145	0	-0.0498	-0.055	-0.045	0.002	-20.55	0	0.4426	0.306	0.579	0.07	6.343	0	0.2901	0.178	0.402	0.057	5.066	0	1.1258	1.019	1.232	0.054	20.699	0	-0.1534
Peritonitis and retroperitoneal infections	digestive	1.0989	0.455	1.743	0.329	3.345	3.00086	1.57617	5.71446	29	6502	16	8337	0.000822234	0.00722964	mi_significant	0.477246	3.085	1.4371	1.238	1.636	0.101	14.179	0	-0.05	-0.055	-0.045	0.002	-20.621	0	0.445	0.308	0.582	0.07	6.376	0	0.2894	0.177	0.402	0.057	5.052	0	1.1275	1.021	1.234	0.054	20.72	0	-0.1527
Pernicious anemia	hematopoietic	1.9098	-0.45	4.269	1.204	1.586	6.75174	0.637628	71.4501	10	6521	10	8343	0.112627	0.304136	not_significant	0.829416	0.948356	1.4348	1.236	1.633	0.101	14.161	0	-0.0499	-0.055	-0.045	0.002	-20.574	0	0.4435	0.307	0.58	0.07	6.357	0	0.291	0.179	0.403	0.057	5.08	0	1.1263	1.02	1.233	0.054	20.704	0	-0.1534
Persistent vomiting		-0.3451	-2.521	1.83	1.11	-0.311	0.70815	0.0803792	6.23389	10	6521	10	8343	0.755858	0.894226	not_significant	-0.149875	0.12156	1.4335	1.235	1.632	0.101	14.149	0	-0.0498	-0.055	-0.045	0.002	-20.555	0	0.4426	0.306	0.579	0.07	6.345	0	0.2901	0.178	0.402	0.057	5.065	0	1.1259	1.019	1.232	0.054	20.7	0	-0.1534
Personal history of allergy to medicinal agents		0.5397	-0.32	1.399	0.438	1.231	1.71549	0.726149	4.05115	18	6513	10	8343	0.218299	0.452931	not_significant	0.234389	0.660949	1.4319	1.233	1.63	0.101	14.134	0	-0.0498	-0.055	-0.045	0.002	-20.538	0	0.4408	0.304	0.578	0.07	6.318	0	0.2895	0.177	0.402	0.057	5.056	0	1.124	1.017	1.231	0.054	20.657	0	-0.154
Personal history of diseases of blood and blood-forming organs	hematopoietic	0.4585	-0.139	1.056	0.305	1.503	1.5817	0.870228	2.87485	26	6505	22	8331	0.132781	0.335912	not_significant	0.199124	0.876865	1.4318	1.233	1.63	0.101	14.13	0	-0.0499	-0.055	-0.045	0.002	-20.554	0	0.4422	0.305	0.579	0.07	6.337	0	0.2904	0.178	0.403	0.057	5.071	0	1.1268	1.02	1.233	0.054	20.713	0	-0.1526
Personal history of diseases of digestive system	digestive	0.1286	-0.154	0.412	0.144	0.891	1.13724	0.857272	1.50983	91	6440	128	8225	0.373015	0.626909	not_significant	0.0558503	0.428274	1.4353	1.237	1.634	0.101	14.162	0	-0.0499	-0.055	-0.045	0.002	-20.569	0	0.442	0.305	0.579	0.07	6.336	0	0.2892	0.177	0.401	0.057	5.048	0	1.1263	1.02	1.233	0.054	20.705	0	-0.1539
Personality disorders	mental disorders	0.2152	-1.339	1.769	0.793	0.271	1.24011	0.262108	5.86499	10	6521	10	8343	0.786075	0.909727	not_significant	0.0934602	0.104536	1.4327	1.234	1.631	0.101	14.142	0	-0.0498	-0.055	-0.045	0.002	-20.553	0	0.443	0.306	0.58	0.07	6.35	0	0.2903	0.178	0.403	0.057	5.069	0	1.1261	1.019	1.233	0.054	20.701	0	-0.1531
Persons encountering health services in circumstances related to reproduction		-3.2628	-3.378	-3.147	0.059	-55.379	0.0382811	0.0341156	0.0429809	2259	4272	7031	1322	0	0	con_significant	-1.41702	inf	2.6584	2.422	2.894	0.12	22.075	0	-0.064	-0.07	-0.058	0.003	-22.547	0	1.2794	1.102	1.457	0.09	14.154	0	1.741	1.585	1.897	0.08	21.881	0	3.0001	2.844	3.156	0.08	37.736	0	1.762
Persons with potential health hazards related to socioeconomic, psychosocial, and other circumstances		0.0524	-0.036	0.141	0.045	1.16	1.0538	0.96464	1.15142	1174	5357	1643	6710	0.245911	0.486518	not_significant	0.022757	0.609223	1.4348	1.236	1.633	0.101	14.163	0	-0.05	-0.055	-0.045	0.002	-20.586	0	0.4399	0.303	0.577	0.07	6.303	0	0.2815	0.168	0.395	0.058	4.873	0	1.1236	1.017	1.23	0.054	20.645	0	-0.1617
Pervasive developmental disorders	mental disorders	-0.2202	-0.594	0.153	0.191	-1.155	0.802358	0.552114	1.16532	46	6485	83	8270	0.248	0.489216	not_significant	-0.0956316	0.605547	1.4353	1.237	1.634	0.101	14.165	0	-0.0499	-0.055	-0.045	0.002	-20.565	0	0.443	0.306	0.58	0.07	6.35	0	0.2919	0.18	0.404	0.057	5.095	0	1.126	1.019	1.233	0.054	20.701	0	-0.1509
Peyronie's disease	genitourinary	-0.2685	-0.753	0.216	0.247	-1.086	0.764525	0.470952	1.2411	26	6505	57	8296	0.277361	0.517267	not_significant	-0.116608	0.556955	1.4291	1.23	1.628	0.101	14.099	0	-0.0497	-0.054	-0.045	0.002	-20.479	0	0.4437	0.307	0.58	0.07	6.359	0	0.2907	0.178	0.403	0.057	5.076	0	1.1259	1.019	1.233	0.054	20.7	0	-0.153
Phlebitis and thrombophlebitis	circulatory system	1.1261	0.244	2.008	0.45	2.502	3.08361	1.27634	7.44841	17	6514	10	8343	0.0123512	0.0627126	not_significant	0.489059	1.90829	1.4297	1.231	1.628	0.101	14.109	0	-0.0498	-0.055	-0.045	0.002	-20.54	0	0.4453	0.309	0.582	0.07	6.382	0	0.2911	0.179	0.403	0.057	5.082	0	1.1273	1.021	1.234	0.054	20.72	0	-0.1533
Phlebitis and thrombophlebitis of intracranial venous sinuses	neurological	0.3163	-2.232	2.865	1.3	0.243	1.37204	0.107314	17.5491	10	6521	10	8343	0.807828	0.919705	not_significant	0.137367	0.0926811	1.4329	1.234	1.631	0.101	14.145	0	-0.0498	-0.055	-0.045	0.002	-20.551	0	0.4427	0.306	0.579	0.07	6.346	0	0.2901	0.178	0.402	0.057	5.065	0	1.1257	1.019	1.232	0.054	20.695	0	-0.1534
Phlebitis and thrombophlebitis of lower extremities	circulatory system	-1.1236	-2.647	0.399	0.777	-1.446	0.325107	0.0708635	1.49033	10	6521	11	8342	0.148181	0.359726	not_significant	-0.487973	0.829208	1.4319	1.233	1.63	0.101	14.134	0	-0.0498	-0.055	-0.045	0.002	-20.528	0	0.4415	0.305	0.578	0.07	6.329	0	0.2904	0.178	0.403	0.057	5.07	0	1.1249	1.018	1.232	0.054	20.682	0	-0.1538
Phobia	mental disorders	-0.2158	-0.759	0.327	0.277	-0.779	0.805896	0.468134	1.3868	21	6510	40	8313	0.436116	0.682082	not_significant	-0.0937207	0.360398	1.4342	1.236	1.633	0.101	14.155	0	-0.0498	-0.055	-0.045	0.002	-20.553	0	0.4423	0.306	0.579	0.07	6.34	0	0.29	0.178	0.402	0.057	5.063	0	1.1251	1.018	1.232	0.054	20.682	0	-0.1533
Pigmentary iris degeneration	sense organs	0.0674	-1.641	1.776	0.872	0.077	1.06972	0.193786	5.90618	10	6521	10	8343	0.93841	0.974918	not_significant	0.0292714	0.0276075	1.433	1.234	1.632	0.101	14.146	0	-0.0498	-0.055	-0.045	0.002	-20.55	0	0.4428	0.306	0.58	0.07	6.347	0	0.2903	0.178	0.403	0.057	5.068	0	1.126	1.019	1.233	0.054	20.693	0	-0.1533
Pilonidal cyst	dermatologic	-0.0635	-0.71	0.583	0.33	-0.193	0.938474	0.491644	1.7914	17	6514	23	8330	0.847195	0.933772	not_significant	-0.0275777	0.0720165	1.4334	1.235	1.632	0.101	14.146	0	-0.0498	-0.055	-0.045	0.002	-20.553	0	0.4427	0.306	0.579	0.07	6.347	0	0.2902	0.178	0.402	0.057	5.067	0	1.1258	1.019	1.232	0.054	20.698	0	-0.1534
Pituitary dwarfism		1.0354	-0.564	2.635	0.816	1.269	2.81623	0.568929	13.9433	10	6521	10	8343	0.204522	0.44018	not_significant	0.449669	0.68926	1.43	1.231	1.629	0.101	14.111	0	-0.0498	-0.055	-0.045	0.002	-20.511	0	0.4426	0.306	0.579	0.07	6.345	0	0.2883	0.176	0.401	0.057	5.032	0	1.1249	1.018	1.232	0.054	20.681	0	-0.1537
Pituitary hyperfunction	endocrine/metabolic	1.8679	1.192	2.544	0.345	5.415	6.47469	3.29366	12.7305	51	6480	11	8342	6.13052e-08	1.80616e-06	mi_significant	0.811219	7.2125	1.4239	1.225	1.623	0.101	14.045	0	-0.0498	-0.055	-0.045	0.002	-20.504	0	0.4338	0.297	0.571	0.07	6.202	0	0.2906	0.178	0.403	0.057	5.069	0	1.1276	1.021	1.234	0.054	20.712	0	-0.1554
Pituitary hypofunction	endocrine/metabolic	1.7752	1.13	2.42	0.329	5.394	5.90146	3.09566	11.2459	57	6474	12	8341	6.88677e-08	1.98614e-06	mi_significant	0.77096	7.16198	1.4152	1.216	1.614	0.101	13.947	0	-0.0495	-0.054	-0.045	0.002	-20.371	0	0.4412	0.304	0.578	0.07	6.322	0	0.2821	0.17	0.395	0.057	4.919	0	1.1243	1.018	1.231	0.054	20.66	0	-0.1597
Pityriasis	dermatologic	-0.757	-1.635	0.121	0.448	-1.691	0.469072	0.194952	1.12862	10	6521	21	8332	0.0909017	0.269159	not_significant	-0.328761	1.04143	1.4353	1.237	1.634	0.101	14.167	0	-0.0498	-0.055	-0.045	0.002	-20.554	0	0.4434	0.307	0.58	0.07	6.354	0	0.2883	0.176	0.401	0.057	5.033	0	1.1244	1.018	1.231	0.054	20.668	0	-0.1542
Pleurisy; pleural effusion	respiratory	1.057	0.54	1.574	0.264	4.01	2.87772	1.71601	4.82591	50	6481	24	8329	6.06375e-05	0.000747345	mi_significant	0.459049	4.21726	1.4258	1.227	1.624	0.101	14.071	0	-0.0499	-0.055	-0.045	0.002	-20.582	0	0.449	0.312	0.586	0.07	6.432	0	0.2966	0.184	0.409	0.057	5.173	0	1.1312	1.025	1.238	0.054	20.771	0	-0.1469
Plica syndrome	musculoskeletal	-0.4195	-2.08	1.241	0.847	-0.495	0.657375	0.12493	3.45907	10	6521	10	8343	0.620405	0.813457	not_significant	-0.182187	0.207325	1.4328	1.234	1.631	0.101	14.144	0	-0.0498	-0.055	-0.045	0.002	-20.545	0	0.4423	0.306	0.579	0.07	6.339	0	0.29	0.178	0.402	0.057	5.064	0	1.1255	1.019	1.232	0.054	20.691	0	-0.1538
Pneumococcal pneumonia	respiratory	0.4995	-0.373	1.372	0.445	1.122	1.6479	0.688665	3.94323	12	6519	10	8343	0.261853	0.504128	not_significant	0.21693	0.581942	1.4326	1.234	1.631	0.101	14.141	0	-0.0498	-0.055	-0.045	0.002	-20.557	0	0.4429	0.306	0.58	0.07	6.348	0	0.29	0.178	0.402	0.057	5.063	0	1.1263	1.02	1.233	0.054	20.706	0	-0.153
Pneumoconiosis	respiratory	0.2738	-2.175	2.723	1.249	0.219	1.31495	0.113608	15.2259	10	6521	10	8343	0.826516	0.927499	not_significant	0.11891	0.0827489	1.4333	1.235	1.632	0.101	14.147	0	-0.0498	-0.055	-0.045	0.002	-20.553	0	0.4428	0.306	0.58	0.07	6.347	0	0.2902	0.178	0.402	0.057	5.067	0	1.1259	1.019	1.233	0.054	20.7	0	-0.1533
Pneumonia	respiratory	0.078	-0.177	0.333	0.13	0.601	1.08112	0.83778	1.39515	116	6415	163	8190	0.548074	0.765817	not_significant	0.033875	0.261161	1.4329	1.234	1.631	0.101	14.146	0	-0.0499	-0.055	-0.045	0.002	-20.561	0	0.4439	0.307	0.581	0.07	6.361	0	0.2903	0.178	0.403	0.057	5.07	0	1.1266	1.02	1.233	0.054	20.707	0	-0.1531
Pneumonitis due to inhalation of food or vomitus	respiratory	1.5103	0.287	2.733	0.624	2.421	4.52809	1.33242	15.379	10	6521	10	8343	0.0154929	0.0744692	not_significant	0.655915	1.80987	1.4353	1.237	1.634	0.101	14.167	0	-0.0499	-0.055	-0.045	0.002	-20.585	0	0.4429	0.306	0.58	0.07	6.347	0	0.2892	0.177	0.402	0.057	5.05	0	1.1265	1.02	1.233	0.054	20.707	0	-0.1537
Poisoning by agents primarily affecting blood constituents	injuries & poisonings	-0.4123	-2.703	1.878	1.169	-0.353	0.662126	0.0670042	6.54041	10	6521	10	8343	0.72424	0.877608	not_significant	-0.17906	0.140118	1.433	1.234	1.632	0.101	14.146	0	-0.0498	-0.055	-0.045	0.002	-20.553	0	0.4427	0.306	0.579	0.07	6.346	0	0.2902	0.178	0.402	0.057	5.068	0	1.1258	1.019	1.232	0.054	20.699	0	-0.1531
Poisoning by agents primarily affecting the cardiovascular system	injuries & poisonings	1.0861	-1.704	3.876	1.423	0.763	2.9627	0.181954	48.2309	10	6521	10	8343	0.445454	0.689289	not_significant	0.471687	0.351197	1.4337	1.235	1.632	0.101	14.151	0	-0.0499	-0.055	-0.045	0.002	-20.56	0	0.4431	0.306	0.58	0.07	6.352	0	0.2906	0.178	0.403	0.057	5.074	0	1.1263	1.02	1.233	0.054	20.706	0	-0.1532
Poisoning by analgesics, antipyretics, and antirheumatics	injuries & poisonings	0.3011	-0.314	0.917	0.314	0.959	1.35134	0.730519	2.50177	24	6507	23	8330	0.337542	0.588555	not_significant	0.130766	0.471673	1.4328	1.234	1.631	0.101	14.144	0	-0.0498	-0.055	-0.045	0.002	-20.555	0	0.4425	0.306	0.579	0.07	6.344	0	0.2896	0.177	0.402	0.057	5.056	0	1.125	1.018	1.232	0.054	20.682	0	-0.1543
Poisoning by antibiotics	injuries & poisonings	0.3337	-0.563	1.23	0.457	0.73	1.39612	0.569498	3.42123	12	6519	10	8343	0.46559	0.703753	not_significant	0.144924	0.331997	1.4323	1.234	1.631	0.101	14.138	0	-0.0498	-0.055	-0.045	0.002	-20.544	0	0.4414	0.305	0.578	0.07	6.325	0	0.2898	0.178	0.402	0.057	5.061	0	1.1254	1.019	1.232	0.054	20.69	0	-0.1541
Poisoning by anticonvulsants and anti-Parkinsonism drugs	injuries & poisonings	1.4918	-0.881	3.865	1.211	1.232	4.44509	0.414368	47.7033	10	6521	10	8343	0.217863	0.452931	not_significant	0.647881	0.661817	1.433	1.234	1.632	0.101	14.146	0	-0.0498	-0.055	-0.045	0.002	-20.552	0	0.4427	0.306	0.579	0.07	6.346	0	0.2897	0.177	0.402	0.057	5.058	0	1.1255	1.019	1.232	0.054	20.693	0	-0.154
Poisoning by hormones and synthetic substitutes	injuries & poisonings	1.1656	-0.412	2.744	0.805	1.448	3.20785	0.662324	15.5491	10	6521	10	8343	0.147683	0.35912	not_significant	0.506214	0.830671	1.435	1.236	1.634	0.101	14.163	0	-0.0499	-0.055	-0.045	0.002	-20.572	0	0.4432	0.307	0.58	0.07	6.353	0	0.2898	0.178	0.402	0.057	5.06	0	1.126	1.019	1.233	0.054	20.699	0	-0.1535
Poisoning by other anti-infectives	injuries & poisonings	0.6767	-0.284	1.637	0.49	1.381	1.96737	0.752767	5.13973	13	6518	10	8343	0.16735	0.386923	not_significant	0.293887	0.776375	1.4335	1.235	1.632	0.101	14.15	0	-0.0499	-0.055	-0.045	0.002	-20.562	0	0.4419	0.305	0.579	0.07	6.334	0	0.29	0.178	0.402	0.057	5.064	0	1.1251	1.019	1.232	0.054	20.685	0	-0.1536
Poisoning by primarily systemic agents	injuries & poisonings	0.9581	-1.233	3.149	1.118	0.857	2.60674	0.291417	23.3127	10	6521	10	8343	0.391481	0.646978	not_significant	0.416098	0.40729	1.4313	1.233	1.63	0.101	14.127	0	-0.0498	-0.055	-0.045	0.002	-20.532	0	0.442	0.305	0.579	0.07	6.335	0	0.2898	0.178	0.402	0.057	5.06	0	1.125	1.018	1.232	0.054	20.682	0	-0.1534
Poisoning by psychotropic agents	injuries & poisonings	0.4268	-0.922	1.776	0.688	0.62	1.53235	0.397723	5.90618	10	6521	10	8343	0.535216	0.758135	not_significant	0.185357	0.271471	1.432	1.233	1.631	0.101	14.134	0	-0.0498	-0.055	-0.045	0.002	-20.544	0	0.443	0.306	0.58	0.07	6.351	0	0.29	0.178	0.402	0.057	5.064	0	1.126	1.019	1.233	0.054	20.702	0	-0.1534
Poisoning/allergy of sulfonamides	injuries & poisonings	0.3613	-0.168	0.89	0.27	1.339	1.43519	0.845354	2.43513	29	6502	31	8322	0.180712	0.409084	not_significant	0.156911	0.743014	1.4338	1.235	1.632	0.101	14.151	0	-0.0499	-0.055	-0.045	0.002	-20.565	0	0.4421	0.305	0.579	0.07	6.337	0	0.2894	0.177	0.402	0.057	5.053	0	1.1256	1.019	1.232	0.054	20.695	0	-0.1547
Polyarteritis nodosa	circulatory system	0.4627	-2.324	3.249	1.422	0.326	1.58836	0.0978813	25.7646	10	6521	10	8343	0.744797	0.890545	not_significant	0.200948	0.127962	1.4327	1.234	1.631	0.101	14.142	0	-0.0498	-0.055	-0.045	0.002	-20.551	0	0.4429	0.306	0.58	0.07	6.349	0	0.2904	0.178	0.403	0.057	5.071	0	1.126	1.019	1.233	0.054	20.701	0	-0.1533
Polyclonal hypergammaglobulinemia	endocrine/metabolic	0.0122	-2.401	2.426	1.231	0.01	1.01227	0.0906273	11.3135	10	6521	10	8343	0.992067	0.995519	not_significant	0.00529839	0.00345907	1.433	1.234	1.632	0.101	14.146	0	-0.0498	-0.055	-0.045	0.002	-20.552	0	0.4427	0.306	0.579	0.07	6.346	0	0.2902	0.178	0.402	0.057	5.068	0	1.1258	1.019	1.232	0.054	20.699	0	-0.1534
Polycythemia vera	neoplasms	1.3403	0.413	2.268	0.473	2.832	3.82019	1.51135	9.66006	17	6514	10	8343	0.00462561	0.0291272	mi_significant	0.582085	2.33483	1.4343	1.236	1.633	0.101	14.153	0	-0.05	-0.055	-0.045	0.002	-20.594	0	0.4442	0.307	0.581	0.07	6.365	0	0.2907	0.178	0.403	0.057	5.074	0	1.1279	1.021	1.234	0.054	20.728	0	-0.151
Polycythemia, secondary	hematopoietic	1.0655	0.365	1.766	0.357	2.981	2.90229	1.44051	5.84742	24	6507	14	8339	0.00287677	0.0203348	mi_significant	0.462741	2.5411	1.4334	1.235	1.632	0.101	14.15	0	-0.0499	-0.055	-0.045	0.002	-20.591	0	0.4437	0.307	0.58	0.07	6.358	0	0.2902	0.178	0.402	0.057	5.066	0	1.1277	1.021	1.234	0.054	20.727	0	-0.1536
[truncated: 306 more rows]
[truncated: 6 more columns]

## Sheet: before_sdoh
phenotype	phecode_category	coef_has_phenotype	ci_lb_has_phenotype	ci_ub_has_phenotype	std err_has_phenotype	z_has_phenotype	odds_ratio_has_phenotype	ci_lb_or_has_phenotype	ci_ub_or_has_phenotype	Count_mi	Count_r_mi	Count_con	Count_r_con	pval_has_phenotype	pval_BH_adj_has_phenotype	significance_bh	log10_OR_has_phenotype	-log10_pval_has_phenotype	coef_Intercept	ci_lb_Intercept	ci_ub_Intercept	std err_Intercept	z_Intercept	pval_Intercept	coef_mi_or_vas_est_age	ci_lb_mi_or_vas_est_age	ci_ub_mi_or_vas_est_age	std err_mi_or_vas_est_age	z_mi_or_vas_est_age	pval_mi_or_vas_est_age	coef_location_source_value[T.1]	ci_lb_location_source_value[T.1]	ci_ub_location_source_value[T.1]	std err_location_source_value[T.1]	z_location_source_value[T.1]	pval_location_source_value[T.1]	coef_location_source_value[T.2]	ci_lb_location_source_value[T.2]	ci_ub_location_source_value[T.2]	std err_location_source_value[T.2]	z_location_source_value[T.2]	pval_location_source_value[T.2]	coef_location_source_value[T.4]	ci_lb_location_source_value[T.4]	ci_ub_location_source_value[T.4]	std err_location_source_value[T.4]	z_location_source_value[T.4]	pval_location_source_value[T.4]	coef_location_source_value[T.5]
[truncated: 1,442 more rows]
[truncated: 66 more columns]

[truncated: 2 more sheets: before_hosp, legend]
