# Supplementary material for: Leveraging Electronic Medical Records from Two Hospital Systems Identifies Male Infertility Associated Comorbidities Across Time
Source: Research Square preprint supplement (doi:10.21203/rs.3.rs-3706493/v1), 2023-12-07
Supplement: Supplementary file 11 [file b76324bba08f81374402325b.xlsx]

## Sheet: location_axis1
location	1	2	3	4	5
1	1	6.69157e-22	7.00795e-36	0.34697	8.54261e-50
2	6.69157e-22	1	0.00845372	2.54132e-23	8.46406e-07
3	7.00795e-36	0.00845372	1	4.44983e-43	1
4	0.34697	2.54132e-23	4.44983e-43	1	2.34236e-70
5	8.54261e-50	8.46406e-07	1	2.34236e-70	1

## Sheet: location_axis2
location	1	2	3	4	5
1	1	3.52386e-12	0.197012	1	5.23537e-45
2	3.52386e-12	1	1.01901e-08	2.77531e-18	1.26508e-14
3	0.197012	1.01901e-08	1	0.100913	3.33105e-51
4	1	2.77531e-18	0.100913	1	2.14931e-82
5	5.23537e-45	1.26508e-14	3.33105e-51	2.14931e-82	1

## Sheet: age_axis1
age_category	30 - 39	40 - 49	50 - 59	60 - 69	70 - 79	< 30	>= 80
30 - 39	1	0.00179521	1.49111e-08	7.83221e-05	1	1	1
40 - 49	0.00179521	1	0.0127758	0.056796	1	1	1
50 - 59	1.49111e-08	0.0127758	1	1	0.791436	0.791436	0.791436
60 - 69	7.83221e-05	0.056796	1	1	0.227464	0.227464	0.227464
70 - 79	1	1	0.791436	0.227464	1	1	1
< 30	1	1	0.791436	0.227464	1	1	1
>= 80	1	1	0.791436	0.227464	1	1	1

## Sheet: age_axis2
age_category	30 - 39	40 - 49	50 - 59	60 - 69	70 - 79	< 30	>= 80
30 - 39	1	4.92109e-17	1.23651e-51	5.97515e-23	0.0310168	0.0310168	0.0310168
40 - 49	4.92109e-17	1	5.59653e-20	1.27712e-09	1.27549e-07	1.27549e-07	1.27549e-07
50 - 59	1.23651e-51	5.59653e-20	1	1	1.45371e-16	1.45371e-16	1.45371e-16
60 - 69	5.97515e-23	1.27712e-09	1	1	1.72093e-16	1.72093e-16	1.72093e-16
70 - 79	0.0310168	1.27549e-07	1.45371e-16	1.72093e-16	1	1	1
< 30	0.0310168	1.27549e-07	1.45371e-16	1.72093e-16	1	1	1
>= 80	0.0310168	1.27549e-07	1.45371e-16	1.72093e-16	1	1	1

## Sheet: race_axis1
identified_race	American Indian or Alaska Native	Asian	Black or African American	Multirace	Native Hawaiian or Other Pacific Islander	Other Race	Unknown	White
American Indian or Alaska Native	1	1	1	1	1	4.3969e-09	2.46761e-21	6.39149e-18
Asian	1	1	1	1	1	4.3969e-09	2.46761e-21	6.39149e-18
Black or African American	1	1	1	1	1	0.167665	4.64033e-05	0.00720491
Multirace	1	1	1	1	1	4.3969e-09	2.46761e-21	6.39149e-18
Native Hawaiian or Other Pacific Islander	1	1	1	1	1	4.3969e-09	2.46761e-21	6.39149e-18
Other Race	4.3969e-09	4.3969e-09	0.167665	4.3969e-09	4.3969e-09	1	0.112229	1
Unknown	2.46761e-21	2.46761e-21	4.64033e-05	2.46761e-21	2.46761e-21	0.112229	1	0.111465
White	6.39149e-18	6.39149e-18	0.00720491	6.39149e-18	6.39149e-18	1	0.111465	1

## Sheet: race_axis2
identified_race	American Indian or Alaska Native	Asian	Black or African American	Multirace	Native Hawaiian or Other Pacific Islander	Other Race	Unknown	White
American Indian or Alaska Native	1	1	0.617657	1	1	0.74293	1	1
Asian	1	1	0.617657	1	1	0.74293	1	1
Black or African American	0.617657	0.617657	1	0.617657	0.617657	0.00226027	0.481201	0.267052
Multirace	1	1	0.617657	1	1	0.74293	1	1
Native Hawaiian or Other Pacific Islander	1	1	0.617657	1	1	0.74293	1	1
Other Race	0.74293	0.74293	0.00226027	0.74293	0.74293	1	0.212937	0.0784999
Unknown	1	1	0.481201	1	1	0.212937	1	1
White	1	1	0.267052	1	1	0.0784999	1	1

## Sheet: ethnicity_axis1
identified_ethnicity	Hispanic or Latino	Not Hispanic or Latino	Unknown
Hispanic or Latino	1	0.737199	2.78157e-16
Not Hispanic or Latino	0.737199	1	1.87167e-22
Unknown	2.78157e-16	1.87167e-22	1

## Sheet: ethnicity_axis2
identified_ethnicity	Hispanic or Latino	Not Hispanic or Latino	Unknown
Hispanic or Latino	1	0.00244973	3.73479e-12
Not Hispanic or Latino	0.00244973	1	8.01708e-09
Unknown	3.73479e-12	8.01708e-09	1

## Sheet: adi_axis1
adi_category	High_ADI	Low_ADI	Medium_ADI
High_ADI	1	0.515737	0.199288
Low_ADI	0.515737	1	9.32091e-05
Medium_ADI	0.199288	9.32091e-05	1

## Sheet: adi_axis2
adi_category	High_ADI	Low_ADI	Medium_ADI
High_ADI	1	9.72896e-11	5.0493e-06
Low_ADI	9.72896e-11	1	0.270666
Medium_ADI	5.0493e-06	0.270666	1

[truncated: 8 more sheets: visits_before_axis1, visits_before_axis2, visits_after_axis1, visits_after_axis2, mths_EMR_before_axis1, mths_EMR_before_axis2, mths_EMR_after_axis1, mths_EMR_after_axis2]
