# Supplementary material for: Leveraging Electronic Medical Records from Two Hospital Systems Identifies Male Infertility Associated Comorbidities Across Time
Source: Research Square preprint supplement (doi:10.21203/rs.3.rs-3706493/v1), 2023-12-07
Supplement: Supplementary file 13 [file c6a2f2b86d3527bca52b4c4e.xlsx]

## Sheet: uc_mannwhitney
umap_comparison	test_statistic	p_value
mi_status_all_axis1	28378721	2.27237e-05
mi_status_all_axis2	20661741	1.1976e-142
mi_status_before_axis1	2.60828e+07	0.000206565
mi_status_before_axis2	20309756	1.21614e-149
mi_status_after_axis1	1.01137e+07	0.00186719
mi_status_after_axis2	9.74423e+06	1.79476e-09

## Sheet: stanford_mannwhitney
umap_comparison	test_statistic	p_value
mi_status_all_axis1	5627387	8.25372e-37
mi_status_all_axis2	8711591	1.79534e-85
mi_status_before_axis1	9048372	3.94904e-256
mi_status_before_axis2	6082276	0.592784
mi_status_after_axis1	3.19058e+06	0.806848
mi_status_after_axis2	3.17863e+06	0.642974

## Sheet: uc_kruskalwallis
umap_comparison	test_statistic	p_value
location_axis1	483.522	2.45327e-103
location_axis2	509.048	7.39884e-109
age_axis1	51.5126	2.33678e-09
age_axis2	383.756	8.67031e-80
race_axis1	297.613	1.95677e-60
race_axis2	17.6391	0.0137091
ethnicity_axis1	104.594	1.93922e-23
ethnicity_axis2	54.0624	1.82184e-12
adi_axis1	17.3967	0.000166863
adi_axis2	44.0507	2.71959e-10
visits_before_axis1	2758.91	0
visits_before_axis2	1774.29	0
visits_after_axis1	649.339	3.2409e-139
visits_after_axis2	409.879	2.04008e-87
mths_EMR_before_axis1	2273.14	0
mths_EMR_before_axis2	1415.77	2.63321e-305
mths_EMR_after_axis1	853.123	2.38609e-183
mths_EMR_after_axis2	319.118	8.13018e-68

## Sheet: stanford_kruskalwallis
umap_comparison	test_statistic	p_value
age_axis1	38.0592	1.09381e-06
age_axis2	28.0621	9.14649e-05
race_axis1	111.017	2.49717e-22
race_axis2	22.863	0.000358544
ethnicity_axis1	35.2483	2.21781e-08
ethnicity_axis2	10.249	0.00594927
visits_before_axis1	575.646	2.88905e-123
visits_before_axis2	193.421	9.75369e-41
visits_after_axis1	152.407	6.20753e-32
visits_after_axis2	121.67	2.34945e-25
mths_EMR_before_axis1	851.129	6.45073e-183
mths_EMR_before_axis2	57.4783	9.81905e-12
mths_EMR_after_axis1	121.338	2.76572e-25
mths_EMR_after_axis2	51.5608	1.70423e-10

## Sheet: legend
umap_comparison	description
mi_status_all_axis1	UMAP component 1 distribution for UMAP of patients' diagnosis profiles, of diagnoses obtained at any time and based on male infertility status
mi_status_all_axis2	UMAP component 2 distribution for UMAP of patients' diagnosis profiles, of diagnoses obtained at any time and based on male infertility status
mi_status_before_axis1	UMAP component 1 distribution for UMAP of patients' diagnosis profiles, of diagnoses first obtained before the 6-month cutoff and based on male infertility status
mi_status_before_axis2	UMAP component 2 distribution for UMAP of patients' diagnosis profiles, of diagnoses first obtained before the 6-month cutoff and based on male infertility status
mi_status_after_axis1	UMAP component 1 distribution for UMAP of patients' diagnosis profiles, of diagnoses first obtained after the 6-month cutoff and based on male infertility status
mi_status_after_axis2	UMAP component 2 distribution for UMAP of patients' diagnosis profiles, of diagnoses first obtained after the 6-month cutoff and based on male infertility status
location_axis1	UMAP component 1 distribution for UMAP of patients' diagnosis profiles, of diagnoses obtained at any time and based on UC location of care
location_axis2	UMAP component 2 distribution for UMAP of patients' diagnosis profiles, of diagnoses obtained at any time and based on UC location of care
age_axis1	UMAP component 1 distribution for UMAP of patients' diagnosis profiles, of diagnoses obtained at any time and based on age category
age_axis2	UMAP component 2 distribution for UMAP of patients' diagnosis profiles, of diagnoses obtained at any time and based on age category
race_axis1	UMAP component 1 distribution for UMAP of patients' diagnosis profiles, of diagnoses obtained at any time and based on self- or provider- identified race category
race_axis2	UMAP component 2 distribution for UMAP of patients' diagnosis profiles, of diagnoses obtained at any time and based on self- or provider- identified race category
ethnicity_axis1	UMAP component 1 distribution for UMAP of patients' diagnosis profiles, of diagnoses obtained at any time and based on self- or provider- identified ethnicity category
ethnicity_axis2	UMAP component 2 distribution for UMAP of patients' diagnosis profiles, of diagnoses obtained at any time and based on self- or provider- identified ethnicity category
adi_axis1	UMAP component 1 distribution for UMAP of patients' diagnosis profiles, of diagnoses obtained at any time and based on area deprivation index category
adi_axis2	UMAP component 2 distribution for UMAP of patients' diagnosis profiles, of diagnoses obtained at any time and based on area deprivation index category
visits_before_axis1	UMAP component 1 distribution for UMAP of patients' diagnosis profiles, of diagnoses first obtained before the 6-month cutoff and based on number of visits before the 6-month cutoff
visits_before_axis2	UMAP component 2 distribution for UMAP of patients' diagnosis profiles, of diagnoses first obtained before the 6-month cutoff and based on number of visits before the 6-month cutoff
visits_after_axis1	UMAP component 1 distribution for UMAP of patients' diagnosis profiles, of diagnoses first obtained after the 6-month cutoff and based on number of visits after the 6-month cutoff
visits_after_axis2	UMAP component 2 distribution for UMAP of patients' diagnosis profiles, of diagnoses first obtained after the 6-month cutoff and based on number of visits after the 6-month cutoff
mths_EMR_before_axis1	UMAP component 1 distribution for UMAP of patients' diagnosis profiles, of diagnoses first obtained before the 6-month cutoff and based on months in the EMR before the 6-month cutoff
mths_EMR_before_axis2	UMAP component 2 distribution for UMAP of patients' diagnosis profiles, of diagnoses first obtained before the 6-month cutoff and based on months in the EMR before the 6-month cutoff
mths_EMR_after_axis1	UMAP component 1 distribution for UMAP of patients' diagnosis profiles, of diagnoses first obtained after the 6-month cutoff and based on months in the EMR after the 6-month cutoff
mths_EMR_after_axis2	UMAP component 2 distribution for UMAP of patients' diagnosis profiles, of diagnoses first obtained after the 6-month cutoff and based on months in the EMR after the 6-month cutoff
