# Supplementary material for: Leveraging Electronic Medical Records from Two Hospital Systems Identifies Male Infertility Associated Comorbidities Across Time
Source: Research Square preprint supplement (doi:10.21203/rs.3.rs-3706493/v1), 2023-12-07
Supplement: Supplementary file 14 [file d6db972b02bf6f158ecb7ee9.xlsx]

## Sheet: after_primary
phenotype	phecode_category	coef_has_phenotype	ci_lb_has_phenotype	ci_ub_has_phenotype	std err_has_phenotype	z_has_phenotype	odds_ratio_has_phenotype	ci_lb_or_has_phenotype	ci_ub_or_has_phenotype	Count_mi	Count_r_mi	Count_con	Count_r_con	pval_has_phenotype	pval_BH_adj_has_phenotype	significance_bh	log10_OR_has_phenotype	-log10_pval_has_phenotype	coef_Intercept	ci_lb_Intercept	ci_ub_Intercept	std err_Intercept	z_Intercept	pval_Intercept	coef_mi_or_vas_est_age	ci_lb_mi_or_vas_est_age	ci_ub_mi_or_vas_est_age	std err_mi_or_vas_est_age	z_mi_or_vas_est_age	pval_mi_or_vas_est_age	converged
Abdominal aortic aneurysm	circulatory system	1.1964	-1.121	3.514	1.182	1.012	3.30819	0.325954	33.5823	10	5541	10	2454	0.311576	0.664988	not_significant	0.51959	0.506435	2.8682	2.606	3.13	0.134	21.47	0	-0.0514	-0.058	-0.045	0.003	-15.815	0	TRUE
Abdominal hernia	digestive	-0.0124	-1.538	1.513	0.778	-0.016	0.987677	0.21481	4.54033	10	5541	10	2454	0.987338	0.99392	not_significant	-0.00538525	0.00553411	2.861	2.599	3.123	0.133	21.439	0	-0.0512	-0.058	-0.045	0.003	-15.772	0	TRUE
Abdominal pain	symptoms	0.3002	0.115	0.486	0.095	3.17	1.35013	1.12187	1.6258	480	5071	168	2296	0.00152679	0.0316434	mi_significant	0.130375	2.81622	2.8506	2.589	3.112	0.134	21.348	0	-0.0516	-0.058	-0.045	0.003	-15.854	0	TRUE
Abnormal arterial blood gases	symptoms	0.2426	-1.468	1.953	0.873	0.278	1.27456	0.230386	7.04981	10	5541	10	2454	0.780985	0.916968	not_significant	0.10536	0.107357	2.8619	2.6	3.123	0.133	21.453	0	-0.0513	-0.058	-0.045	0.003	-15.787	0	TRUE
Abnormal coagulation profile	hematopoietic	0.1774	-1.102	1.457	0.653	0.272	1.19411	0.332206	4.29306	10	5541	10	2454	0.785768	0.916968	not_significant	0.0770438	0.104706	2.8623	2.601	3.124	0.133	21.45	0	-0.0513	-0.058	-0.045	0.003	-15.784	0	TRUE
Abnormal electrocardiogram [ECG] [EKG]	circulatory system	0.8104	0.422	1.199	0.198	4.085	2.24881	1.52501	3.3168	137	5414	34	2430	4.41248e-05	0.0022052	mi_significant	0.351952	4.35532	2.8907	2.628	3.153	0.134	21.574	0	-0.0524	-0.059	-0.046	0.003	-16.025	0	TRUE
Abnormal findings examination of lungs	respiratory	0.5843	0.176	0.992	0.208	2.808	1.79373	1.19244	2.69662	112	5439	31	2433	0.00498551	0.0693379	not_significant	0.253758	2.30229	2.8656	2.604	3.127	0.134	21.455	0	-0.0516	-0.058	-0.045	0.003	-15.858	0	TRUE
Abnormal findings on exam of gastrointestinal tract/ abdominal area	digestive	0.0759	-0.583	0.735	0.336	0.226	1.07885	0.558221	2.08548	28	5523	14	2450	0.821482	0.93007	not_significant	0.032963	0.0854017	2.8618	2.6	3.123	0.133	21.451	0	-0.0513	-0.058	-0.045	0.003	-15.783	0	TRUE
Abnormal findings on study of brain and/or nervous system	neurological	0.7841	-1.657	3.226	1.246	0.629	2.19043	0.19071	25.1787	10	5541	10	2454	0.529066	0.804637	not_significant	0.34053	0.27649	2.8648	2.603	3.126	0.134	21.456	0	-0.0513	-0.058	-0.045	0.003	-15.796	0	TRUE
Abnormal function study of cardiovascular system	circulatory system	0.3257	-0.722	1.373	0.534	0.609	1.385	0.48578	3.94717	13	5538	10	2454	0.542281	0.805044	not_significant	0.14145	0.265776	2.8622	2.601	3.124	0.133	21.456	0	-0.0513	-0.058	-0.045	0.003	-15.794	0	TRUE
Abnormal heart sounds	circulatory system	-0.0967	-0.746	0.553	0.331	-0.292	0.907828	0.47426	1.73846	27	5524	15	2449	0.770537	0.914093	not_significant	-0.0419963	0.113207	2.8607	2.599	3.122	0.133	21.448	0	-0.0512	-0.058	-0.045	0.003	-15.773	0	TRUE
Abnormal involuntary movements	neurological	0.2269	-0.214	0.668	0.225	1.009	1.2547	0.807348	1.95033	70	5481	30	2434	0.313212	0.664988	not_significant	0.0985414	0.504162	2.8659	2.604	3.128	0.134	21.465	0	-0.0514	-0.058	-0.045	0.003	-15.811	0	TRUE
Abnormal posture	symptoms	1.3545	-0.749	3.458	1.073	1.262	3.87482	0.472839	31.7534	10	5541	10	2454	0.207034	0.545723	not_significant	0.588252	0.683959	2.8596	2.598	3.121	0.133	21.434	0	-0.0512	-0.058	-0.045	0.003	-15.778	0	TRUE
Abnormal results of function study of kidney	genitourinary	0.9485	-0.572	2.469	0.776	1.223	2.58183	0.564396	11.8106	12	5539	10	2454	0.221499	0.57062	not_significant	0.411928	0.654629	2.8595	2.598	3.121	0.133	21.433	0	-0.0512	-0.058	-0.045	0.003	-15.778	0	TRUE
Abnormal results of function study of liver	digestive	0.5544	-0.012	1.121	0.289	1.917	1.7409	0.988072	3.06792	57	5494	16	2448	0.0552447	0.313944	not_significant	0.240773	1.25771	2.8627	2.601	3.124	0.133	21.449	0	-0.0514	-0.058	-0.045	0.003	-15.817	0	TRUE
Abnormal results of function study of pulmonary system	respiratory	0.1603	-1.19	1.511	0.689	0.233	1.17386	0.304221	4.53126	10	5541	10	2454	0.816045	0.928887	not_significant	0.0696174	0.0882858	2.8609	2.599	3.122	0.133	21.45	0	-0.0512	-0.058	-0.045	0.003	-15.785	0	TRUE
Abnormal results of function study of thyroid	endocrine/metabolic	0.5834	-0.256	1.423	0.428	1.362	1.79212	0.774142	4.14955	28	5523	10	2454	0.173055	0.501147	not_significant	0.253367	0.761817	2.8591	2.598	3.121	0.133	21.433	0	-0.0513	-0.058	-0.045	0.003	-15.785	0	TRUE
Abnormal results of other function studies (bladder, pancreas, placenta, spleen, etc)	symptoms	1.2873	-0.787	3.361	1.058	1.216	3.62299	0.455208	28.818	10	5541	10	2454	0.223802	0.571398	not_significant	0.559067	0.650136	2.8584	2.597	3.12	0.133	21.43	0	-0.0512	-0.058	-0.045	0.003	-15.773	0	TRUE
Abnormal spermatozoa	genitourinary	2.2092	1.047	3.372	0.593	3.724	9.10843	2.84909	29.1367	65	5486	10	2454	0.000195786	0.00757179	mi_significant	0.959443	3.70822	2.8422	2.58	3.104	0.134	21.28	0	-0.051	-0.057	-0.045	0.003	-15.696	0	TRUE
Abnormality of gait	neurological	1.5813	0.086	3.077	0.763	2.073	4.86127	1.08981	21.6932	16	5535	10	2454	0.0382033	0.246225	not_significant	0.68675	1.4179	2.8698	2.608	3.131	0.134	21.49	0	-0.0515	-0.058	-0.045	0.003	-15.848	0	TRUE
Acid-base balance disorder	endocrine/metabolic	0.6107	-1.005	2.226	0.824	0.741	1.84172	0.366045	9.26274	10	5541	10	2454	0.458699	0.752383	not_significant	0.265224	0.338472	2.8631	2.602	3.125	0.133	21.461	0	-0.0513	-0.058	-0.045	0.003	-15.798	0	TRUE
Acidosis	endocrine/metabolic	0.2425	-0.565	1.051	0.412	0.588	1.27443	0.56836	2.86051	20	5531	10	2454	0.556322	0.816801	not_significant	0.105316	0.254674	2.8634	2.602	3.125	0.133	21.457	0	-0.0513	-0.058	-0.045	0.003	-15.794	0	TRUE
Acne	dermatologic	0.3344	-0.162	0.831	0.253	1.32	1.3971	0.850441	2.29561	71	5480	21	2443	0.18673	0.518274	not_significant	0.145228	0.728785	2.8545	2.593	3.116	0.133	21.385	0	-0.0512	-0.058	-0.045	0.003	-15.755	0	TRUE
Acquired absence of limb		0.6488	-1.59	2.888	1.142	0.568	1.91324	0.203926	17.9574	10	5541	10	2454	0.570093	0.822085	not_significant	0.28177	0.244054	2.8612	2.6	3.123	0.133	21.451	0	-0.0513	-0.058	-0.045	0.003	-15.787	0	TRUE
Acquired absence of organs		0.6447	0.164	1.125	0.245	2.63	1.90542	1.17821	3.08022	79	5472	23	2441	0.00853656	0.0939911	not_significant	0.27999	2.06872	2.8761	2.614	3.138	0.134	21.515	0	-0.0518	-0.058	-0.045	0.003	-15.903	0	TRUE
Acquired acanthosis nigricans	dermatologic	1.4763	-0.614	3.566	1.066	1.384	4.37672	0.541182	35.3748	10	5541	10	2454	0.166225	0.496327	not_significant	0.641149	0.779304	2.8621	2.6	3.124	0.133	21.447	0	-0.0513	-0.058	-0.045	0.003	-15.792	0	TRUE
Acquired deformities of finger	musculoskeletal	0.2426	-0.777	1.262	0.52	0.466	1.27456	0.459783	3.53248	15	5536	10	2454	0.640931	0.847069	not_significant	0.10536	0.193189	2.8601	2.599	3.122	0.133	21.443	0	-0.0512	-0.058	-0.045	0.003	-15.782	0	TRUE
Acquired foot deformities	musculoskeletal	0.3405	-0.549	1.23	0.454	0.75	1.40565	0.577527	3.42123	19	5532	10	2454	0.453024	0.751572	not_significant	0.147877	0.343878	2.8623	2.601	3.124	0.133	21.457	0	-0.0513	-0.058	-0.045	0.003	-15.797	0	TRUE
Acquired hemolytic anemias	hematopoietic	-1.8749	-4.165	0.415	1.168	-1.605	0.15337	0.0155297	1.51437	10	5541	10	2454	0.10851	0.426368	not_significant	-0.814259	0.964528	2.8617	2.6	3.123	0.133	21.451	0	-0.0512	-0.058	-0.045	0.003	-15.778	0	TRUE
Acquired hypothyroidism	endocrine/metabolic	0.5644	-0.091	1.219	0.334	1.689	1.75839	0.913018	3.3838	42	5509	12	2452	0.0912021	0.40335	not_significant	0.245116	1.04	2.8635	2.602	3.125	0.133	21.459	0	-0.0514	-0.058	-0.045	0.003	-15.817	0	TRUE
Acquired spondylolisthesis	musculoskeletal	-0.0723	-0.777	0.633	0.36	-0.201	0.930252	0.459783	1.88325	22	5529	13	2451	0.840785	0.930983	not_significant	-0.0313995	0.0753151	2.8604	2.599	3.122	0.133	21.441	0	-0.0512	-0.058	-0.045	0.003	-15.766	0	TRUE
Acquired toe deformities	musculoskeletal	0.9598	-1.218	3.137	1.111	0.864	2.61117	0.295821	23.0347	10	5541	10	2454	0.387643	0.712169	not_significant	0.416836	0.411568	2.8618	2.6	3.123	0.133	21.455	0	-0.0513	-0.058	-0.045	0.003	-15.793	0	TRUE
Actinic keratosis	dermatologic	0.0317	-0.306	0.369	0.172	0.184	1.03221	0.736387	1.44629	98	5453	58	2406	0.85414	0.936542	not_significant	0.0137671	0.0684709	2.8633	2.601	3.126	0.134	21.381	0	-0.0513	-0.058	-0.045	0.003	-15.695	0	TRUE
Acute and chronic tonsillitis	respiratory	-0.0898	-2.374	2.195	1.166	-0.077	0.914114	0.0931076	8.98	10	5541	10	2454	0.938572	0.976448	not_significant	-0.0389996	0.0275322	2.8614	2.6	3.123	0.133	21.448	0	-0.0513	-0.058	-0.045	0.003	-15.784	0	TRUE
Acute and subacute necrosis of liver	digestive	-0.0458	-1.881	1.79	0.936	-0.049	0.955233	0.152438	5.98945	10	5541	10	2454	0.961021	0.982774	not_significant	-0.0198907	0.0172673	2.861	2.6	3.122	0.133	21.447	0	-0.0512	-0.058	-0.045	0.003	-15.779	0	TRUE
Acute appendicitis	digestive	-0.578	-1.907	0.751	0.678	-0.852	0.561019	0.148525	2.11912	10	5541	10	2454	0.394143	0.717068	not_significant	-0.251022	0.404347	2.8618	2.6	3.123	0.133	21.456	0	-0.0512	-0.058	-0.045	0.003	-15.784	0	TRUE
Acute bronchitis and bronchiolitis	respiratory	0.4356	0.093	0.778	0.175	2.493	1.54589	1.09746	2.17711	149	5402	45	2419	0.0126793	0.124042	not_significant	0.189179	1.89691	2.8563	2.595	3.118	0.133	21.411	0	-0.0514	-0.058	-0.045	0.003	-15.817	0	TRUE
Acute bronchospasm	respiratory	0.2806	-0.323	0.884	0.308	0.911	1.32392	0.723974	2.42056	39	5512	15	2449	0.362347	0.701703	not_significant	0.121863	0.440875	2.8626	2.601	3.124	0.133	21.459	0	-0.0513	-0.058	-0.045	0.003	-15.802	0	TRUE
Acute cystitis	genitourinary	1.2151	0.329	2.101	0.452	2.688	3.37063	1.38958	8.17434	35	5516	10	2454	0.00718376	0.0834421	not_significant	0.527711	2.14365	2.8741	2.612	3.136	0.134	21.505	0	-0.0517	-0.058	-0.045	0.003	-15.882	0	TRUE
Acute gastritis	digestive	0.77	-0.322	1.862	0.557	1.382	2.15977	0.724698	6.4366	19	5532	10	2454	0.166905	0.496954	not_significant	0.334407	0.77753	2.86	2.599	3.121	0.133	21.439	0	-0.0513	-0.058	-0.045	0.003	-15.787	0	TRUE
Acute laryngitis and tracheitis	respiratory	0.6283	-0.755	2.011	0.706	0.89	1.87442	0.470011	7.47078	10	5541	10	2454	0.373259	0.702655	not_significant	0.272867	0.42799	2.8656	2.604	3.127	0.133	21.467	0	-0.0514	-0.058	-0.045	0.003	-15.808	0	TRUE
Acute osteomyelitis	musculoskeletal	-0.6224	-2.613	1.369	1.016	-0.613	0.536655	0.0733143	3.93142	10	5541	10	2454	0.540095	0.804753	not_significant	-0.270305	0.26753	2.8606	2.599	3.122	0.133	21.447	0	-0.0512	-0.058	-0.045	0.003	-15.778	0	TRUE
Acute pain	neurological	-0.0757	-0.363	0.211	0.146	-0.517	0.927094	0.695586	1.23491	145	5406	77	2387	0.605075	0.830271	not_significant	-0.0328761	0.218191	2.8602	2.599	3.122	0.133	21.443	0	-0.0512	-0.058	-0.045	0.003	-15.745	0	TRUE
Acute pancreatitis	digestive	0.0781	-1.077	1.234	0.589	0.133	1.08123	0.340616	3.43494	11	5540	10	2454	0.894558	0.956065	not_significant	0.0339184	0.0483914	2.8607	2.599	3.122	0.133	21.445	0	-0.0512	-0.058	-0.045	0.003	-15.782	0	TRUE
Acute pericarditis	circulatory system	-0.7248	-2.061	0.612	0.682	-1.063	0.484421	0.127327	1.84412	10	5541	10	2454	0.287879	0.642855	not_significant	-0.314777	0.540789	2.8635	2.602	3.125	0.133	21.465	0	-0.0513	-0.058	-0.045	0.003	-15.795	0	TRUE
Acute pharyngitis	respiratory	0.2186	-0.03	0.467	0.127	1.723	1.24433	0.970446	1.5952	256	5295	90	2374	0.0848684	0.390503	not_significant	0.0949368	1.07125	2.8492	2.587	3.111	0.134	21.336	0	-0.0512	-0.058	-0.045	0.003	-15.76	0	TRUE
Acute posthemorrhagic anemia	hematopoietic	0.4565	-0.182	1.095	0.326	1.4	1.57854	0.833601	2.98918	37	5514	14	2450	0.161388	0.488787	not_significant	0.198255	0.79213	2.8696	2.608	3.131	0.134	21.486	0	-0.0515	-0.058	-0.045	0.003	-15.837	0	TRUE
Acute prostatitis	genitourinary	0.748	-0.559	2.055	0.667	1.122	2.11277	0.571781	7.80684	10	5541	10	2454	0.261951	0.618041	not_significant	0.324852	0.581779	2.8656	2.604	3.127	0.133	21.471	0	-0.0514	-0.058	-0.045	0.003	-15.813	0	TRUE
Acute reaction to stress	mental disorders	-0.1915	-0.912	0.529	0.368	-0.521	0.82572	0.40172	1.69723	21	5530	12	2452	0.602285	0.830271	not_significant	-0.0831674	0.220198	2.8613	2.6	3.123	0.133	21.453	0	-0.0512	-0.058	-0.045	0.003	-15.779	0	TRUE
Acute renal failure	genitourinary	0.8609	0.261	1.461	0.306	2.814	2.36529	1.29823	4.31027	60	5491	14	2450	0.00489309	0.06896	not_significant	0.373884	2.31042	2.8744	2.612	3.136	0.134	21.506	0	-0.0517	-0.058	-0.045	0.003	-15.894	0	TRUE
Acute sinusitis	respiratory	0.1199	-0.152	0.392	0.139	0.863	1.12738	0.858988	1.47994	192	5359	78	2386	0.388088	0.712169	not_significant	0.0520719	0.411069	2.8588	2.597	3.12	0.133	21.427	0	-0.0513	-0.058	-0.045	0.003	-15.793	0	TRUE
Acute tonsillitis	respiratory	-0.2551	-1.226	0.715	0.495	-0.515	0.774839	0.293464	2.04419	11	5540	10	2454	0.606394	0.830271	not_significant	-0.110789	0.217245	2.8609	2.599	3.122	0.133	21.449	0	-0.0512	-0.058	-0.045	0.003	-15.777	0	TRUE
Acute upper respiratory infections of multiple or unspecified sites	respiratory	0.4615	0.246	0.677	0.11	4.193	1.58645	1.2789	1.96796	396	5155	116	2348	2.75192e-05	0.00181946	mi_significant	0.200427	4.56036	2.841	2.579	3.103	0.134	21.267	0	-0.0514	-0.058	-0.045	0.003	-15.813	0	TRUE
Adjustment reaction	mental disorders	0.3134	-0.076	0.703	0.199	1.576	1.36807	0.926816	2.0198	104	5447	36	2428	0.114921	0.433	not_significant	0.136108	0.939601	2.8605	2.599	3.122	0.133	21.438	0	-0.0514	-0.058	-0.045	0.003	-15.809	0	TRUE
Adverse drug events and drug allergies	injuries & poisonings	-0.1095	-1.774	1.555	0.849	-0.129	0.896282	0.169653	4.73509	10	5541	10	2454	0.897362	0.95616	not_significant	-0.0475552	0.0470325	2.8614	2.6	3.123	0.133	21.451	0	-0.0513	-0.058	-0.045	0.003	-15.786	0	TRUE
Agorophobia, social phobia, and panic disorder	mental disorders	-0.0797	-0.676	0.517	0.304	-0.262	0.923393	0.508648	1.67699	37	5514	16	2448	0.793268	0.917379	not_significant	-0.0346133	0.10058	2.8623	2.601	3.124	0.133	21.447	0	-0.0513	-0.058	-0.045	0.003	-15.787	0	TRUE
Alcohol-related disorders	mental disorders	-0.2854	-0.904	0.334	0.316	-0.904	0.751714	0.404947	1.39654	27	5524	17	2447	0.366181	0.702655	not_significant	-0.123948	0.436304	2.8613	2.6	3.123	0.133	21.453	0	-0.0512	-0.058	-0.045	0.003	-15.773	0	TRUE
Alcoholic liver damage	mental disorders	-0.0242	-1.038	0.99	0.517	-0.047	0.97609	0.354162	2.69123	10	5541	10	2454	0.962671	0.982774	not_significant	-0.0105099	0.0165221	2.8609	2.599	3.122	0.133	21.432	0	-0.0512	-0.058	-0.045	0.003	-15.762	0	TRUE
Alcoholism	mental disorders	-0.1668	-0.798	0.464	0.322	-0.518	0.846369	0.450229	1.59042	28	5523	16	2448	0.604444	0.830271	not_significant	-0.0724403	0.218644	2.8609	2.599	3.122	0.133	21.45	0	-0.0512	-0.058	-0.045	0.003	-15.774	0	TRUE
Allergic conjunctivitis	sense organs	0.1764	-0.606	0.959	0.399	0.442	1.19292	0.545529	2.60909	24	5527	10	2454	0.658699	0.858501	not_significant	0.0766095	0.181313	2.8605	2.599	3.122	0.133	21.446	0	-0.0512	-0.058	-0.045	0.003	-15.786	0	TRUE
Allergic reaction to food	injuries & poisonings	-0.0722	-1.293	1.149	0.623	-0.116	0.930345	0.274446	3.15504	10	5541	10	2454	0.907689	0.96135	not_significant	-0.0313561	0.0420631	2.8612	2.6	3.123	0.133	21.452	0	-0.0512	-0.058	-0.045	0.003	-15.785	0	TRUE
Allergic rhinitis	respiratory	0.6224	0.371	0.874	0.128	4.852	1.86339	1.44918	2.39648	317	5234	83	2381	1.22099e-06	0.00018437	mi_significant	0.270305	5.91329	2.858	2.596	3.12	0.134	21.391	0	-0.0519	-0.058	-0.045	0.003	-15.928	0	TRUE
Allergies, other	injuries & poisonings	0.4245	-0.033	0.882	0.233	1.818	1.52883	0.967539	2.41573	82	5469	25	2439	0.0690561	0.354331	not_significant	0.184358	1.1608	2.8593	2.598	3.121	0.133	21.429	0	-0.0513	-0.058	-0.045	0.003	-15.802	0	TRUE
Alopecia	dermatologic	0.6631	0.193	1.133	0.24	2.767	1.9408	1.21288	3.10496	98	5453	22	2442	0.00566139	0.075748	not_significant	0.287981	2.24708	2.8496	2.588	3.111	0.133	21.349	0	-0.0512	-0.058	-0.045	0.003	-15.753	0	TRUE
Alopecia Areata	dermatologic	1.1492	-0.318	2.616	0.749	1.535	3.15567	0.727603	13.6809	18	5533	10	2454	0.124767	0.443715	not_significant	0.499091	0.903899	2.8529	2.591	3.114	0.133	21.38	0	-0.0511	-0.057	-0.045	0.003	-15.733	0	TRUE
Alpha-1-antitrypsin deficiency	endocrine/metabolic	-0.2478	-3.054	2.558	1.432	-0.173	0.780516	0.0471699	12.91	10	5541	10	2454	0.862599	0.940621	not_significant	-0.107618	0.0641911	2.8606	2.599	3.122	0.133	21.444	0	-0.0512	-0.058	-0.045	0.003	-15.777	0	TRUE
Alteration of consciousness	mental disorders	0.2964	-0.401	0.994	0.356	0.833	1.34501	0.66965	2.70202	33	5518	11	2453	0.404855	0.720354	not_significant	0.128725	0.392701	2.8598	2.598	3.121	0.133	21.44	0	-0.0513	-0.058	-0.045	0.003	-15.786	0	TRUE
Altered mental status	mental disorders	1.0115	0.088	1.935	0.471	2.146	2.74972	1.09199	6.92404	25	5526	10	2454	0.0318759	0.217373	not_significant	0.439289	1.49654	2.8769	2.615	3.139	0.134	21.511	0	-0.0517	-0.058	-0.045	0.003	-15.878	0	TRUE
Althete's foot	infectious diseases	0.4187	-0.021	0.859	0.225	1.864	1.51998	0.979219	2.3608	82	5469	28	2436	0.0622729	0.337551	not_significant	0.181839	1.2057	2.8667	2.605	3.128	0.133	21.481	0	-0.0515	-0.058	-0.045	0.003	-15.848	0	TRUE
Amblyopia	sense organs	1.4171	-0.687	3.522	1.074	1.32	4.12514	0.503083	33.8521	10	5541	10	2454	0.186919	0.518274	not_significant	0.615439	0.728346	2.8624	2.601	3.124	0.133	21.455	0	-0.0513	-0.058	-0.045	0.003	-15.798	0	TRUE
Anal and rectal conditions	digestive	0.6053	0.204	1.006	0.205	2.958	1.8318	1.2263	2.73464	124	5427	31	2433	0.00309594	0.0472297	mi_significant	0.262878	2.50921	2.8535	2.592	3.115	0.133	21.381	0	-0.0513	-0.058	-0.045	0.003	-15.795	0	TRUE
Anal and rectal polyp	digestive	0.0343	-0.5	0.569	0.273	0.126	1.0349	0.606531	1.7665	39	5512	22	2442	0.899912	0.956948	not_significant	0.0148963	0.0458002	2.8619	2.6	3.124	0.134	21.434	0	-0.0513	-0.058	-0.045	0.003	-15.761	0	TRUE
Anaphylactic shock NOS	injuries & poisonings	0.5427	-0.595	1.68	0.58	0.935	1.72065	0.551563	5.36556	14	5537	10	2454	0.34971	0.696113	not_significant	0.235692	0.456292	2.8619	2.6	3.123	0.133	21.452	0	-0.0513	-0.058	-0.045	0.003	-15.793	0	TRUE
Anemia in chronic kidney disease	hematopoietic	2.6139	0.556	4.672	1.05	2.49	13.6522	1.74368	106.911	18	5533	10	2454	0.0127914	0.124042	not_significant	1.1352	1.89308	2.8835	2.621	3.146	0.134	21.539	0	-0.0519	-0.058	-0.046	0.003	-15.919	0	TRUE
Anemia in neoplastic disease	hematopoietic	0.813	-0.501	2.127	0.67	1.213	2.25466	0.605924	8.38966	12	5539	10	2454	0.225101	0.5731	not_significant	0.353081	0.647622	2.8643	2.603	3.126	0.133	21.464	0	-0.0514	-0.058	-0.045	0.003	-15.808	0	TRUE
Anemia of chronic disease	hematopoietic	1.0824	-0.021	2.186	0.563	1.923	2.95176	0.979219	8.89954	21	5530	10	2454	0.054483	0.312981	not_significant	0.47008	1.26374	2.868	2.606	3.13	0.134	21.472	0	-0.0515	-0.058	-0.045	0.003	-15.831	0	TRUE
Aneurysm and dissection of heart	circulatory system	-1.1448	-4.139	1.849	1.528	-0.749	0.318288	0.0159388	6.35346	10	5541	10	2454	0.453645	0.751572	not_significant	-0.49718	0.343284	2.8621	2.601	3.124	0.133	21.461	0	-0.0513	-0.058	-0.045	0.003	-15.793	0	TRUE
Angina pectoris	circulatory system	0.106	-0.588	0.8	0.354	0.3	1.11182	0.555437	2.22554	24	5527	13	2451	0.764558	0.914093	not_significant	0.0460352	0.11659	2.8627	2.601	3.124	0.133	21.445	0	-0.0513	-0.058	-0.045	0.003	-15.777	0	TRUE
Anisometropia	sense organs	-0.3278	-1.462	0.806	0.579	-0.567	0.720507	0.231772	2.23893	10	5541	10	2454	0.571002	0.822274	not_significant	-0.142362	0.243362	2.859	2.597	3.12	0.133	21.428	0	-0.0512	-0.058	-0.045	0.003	-15.755	0	TRUE
Ankylosing spondylitis	musculoskeletal	-0.3973	-2.215	1.421	0.928	-0.428	0.672132	0.109154	4.14126	10	5541	10	2454	0.668389	0.863771	not_significant	-0.172545	0.174971	2.8614	2.6	3.123	0.133	21.453	0	-0.0512	-0.058	-0.045	0.003	-15.785	0	TRUE
Ankylosis of joint	musculoskeletal	0.0079	-1.699	1.714	0.871	0.009	1.00793	0.182866	5.55112	10	5541	10	2454	0.992744	0.995845	not_significant	0.00343093	0.00316271	2.8611	2.6	3.123	0.133	21.452	0	-0.0512	-0.058	-0.045	0.003	-15.785	0	TRUE
Anomalies of endocrine glands, congenital	congenital anomalies	-0.7859	-3.564	1.992	1.417	-0.554	0.455709	0.0283253	7.33018	10	5541	10	2454	0.579263	0.827978	not_significant	-0.341312	0.237124	2.8613	2.6	3.123	0.133	21.453	0	-0.0512	-0.058	-0.045	0.003	-15.785	0	TRUE
Anomalies of jaw size/symmetry	digestive	0.1402	-0.915	1.195	0.538	0.26	1.1505	0.400517	3.30356	12	5539	10	2454	0.794536	0.917841	not_significant	0.0608881	0.0998867	2.8611	2.6	3.123	0.133	21.452	0	-0.0513	-0.058	-0.045	0.003	-15.787	0	TRUE
Anomalies of pupillary function	sense organs	-0.5667	-1.909	0.775	0.685	-0.828	0.567395	0.148229	2.17059	10	5541	10	2454	0.407882	0.723158	not_significant	-0.246115	0.389466	2.8616	2.6	3.123	0.133	21.454	0	-0.0512	-0.058	-0.045	0.003	-15.783	0	TRUE
Anomalies of respiratory system, congenital	congenital anomalies	1.0322	-1.168	3.232	1.122	0.92	2.80723	0.310988	25.3303	10	5541	10	2454	0.357781	0.700191	not_significant	0.448279	0.446383	2.8627	2.601	3.124	0.133	21.457	0	-0.0513	-0.058	-0.045	0.003	-15.796	0	TRUE
Anomalies of tooth position/malocclusion	digestive	-0.1423	-1.79	1.505	0.841	-0.169	0.867361	0.16696	4.50415	10	5541	10	2454	0.865591	0.942255	not_significant	-0.0618001	0.0626875	2.8616	2.6	3.123	0.133	21.449	0	-0.0513	-0.058	-0.045	0.003	-15.785	0	TRUE
Anomalous atrioventricular excitation	circulatory system	0.5658	-1.585	2.716	1.097	0.516	1.76086	0.204948	15.1197	10	5541	10	2454	0.606088	0.830271	not_significant	0.245724	0.217464	2.8596	2.598	3.121	0.133	21.438	0	-0.0512	-0.058	-0.045	0.003	-15.775	0	TRUE
Anorexia	endocrine/metabolic	1.1446	-0.108	2.398	0.639	1.79	3.14118	0.897628	11.0012	19	5532	10	2454	0.0733797	0.370823	not_significant	0.497093	1.13442	2.8617	2.6	3.123	0.133	21.454	0	-0.0513	-0.058	-0.045	0.003	-15.805	0	TRUE
Anticoagulants causing adverse effects	injuries & poisonings	0.6008	-1.921	3.123	1.287	0.467	1.82358	0.14646	22.7144	10	5541	10	2454	0.640594	0.847069	not_significant	0.260924	0.193417	2.8633	2.602	3.125	0.133	21.452	0	-0.0513	-0.058	-0.045	0.003	-15.79	0	TRUE
Antineoplastic and immunosuppressive drugs causing adverse effects	injuries & poisonings	-0.1836	-1.305	0.938	0.572	-0.321	0.832269	0.271173	2.55487	10	5541	10	2454	0.748425	0.911389	not_significant	-0.0797365	0.125852	2.8611	2.6	3.123	0.133	21.453	0	-0.0512	-0.058	-0.045	0.003	-15.784	0	TRUE
Anxiety disorder	mental disorders	0.0736	-0.185	0.332	0.132	0.558	1.07638	0.831104	1.39375	209	5342	88	2376	0.576532	0.827978	not_significant	0.0319641	0.239177	2.8593	2.598	3.121	0.133	21.43	0	-0.0513	-0.058	-0.045	0.003	-15.789	0	TRUE
Anxiety disorders	mental disorders	0.7041	-1.455	2.863	1.102	0.639	2.02203	0.2334	17.514	10	5541	10	2454	0.522722	0.797283	not_significant	0.305787	0.281729	2.8601	2.599	3.122	0.133	21.443	0	-0.0512	-0.058	-0.045	0.003	-15.781	0	TRUE
Aortic aneurysm	circulatory system	0.5986	-0.451	1.648	0.535	1.118	1.81957	0.636991	5.19658	15	5536	10	2454	0.263508	0.61895	not_significant	0.259969	0.579207	2.8659	2.604	3.127	0.133	21.47	0	-0.0514	-0.058	-0.045	0.003	-15.814	0	TRUE
Aortic ectasia	circulatory system	-0.0944	-0.825	0.636	0.373	-0.253	0.909919	0.438235	1.88891	20	5531	12	2452	0.800005	0.920064	not_significant	-0.0409974	0.0969072	2.8604	2.599	3.122	0.133	21.442	0	-0.0512	-0.058	-0.045	0.003	-15.768	0	TRUE
Aphasia	mental disorders	1.7796	-0.335	3.894	1.079	1.65	5.92748	0.715338	49.1069	10	5541	10	2454	0.09901	0.416947	not_significant	0.77287	1.00432	2.8705	2.609	3.132	0.134	21.492	0	-0.0515	-0.058	-0.045	0.003	-15.843	0	TRUE
Aphasia/speech disturbance	mental disorders	1.4616	0.219	2.704	0.634	2.306	4.31285	1.24483	14.9394	20	5531	10	2454	0.021134	0.171285	not_significant	0.634765	1.67502	2.8752	2.613	3.137	0.134	21.506	0	-0.0517	-0.058	-0.045	0.003	-15.873	0	TRUE
Aplastic anemia	hematopoietic	0.0676	-1.635	1.77	0.869	0.078	1.06994	0.194952	5.87085	10	5541	10	2454	0.937962	0.976448	not_significant	0.0293583	0.0278149	2.8611	2.6	3.122	0.133	21.451	0	-0.0512	-0.058	-0.045	0.003	-15.785	0	TRUE
Apnea	respiratory	0.0198	-0.944	0.984	0.492	0.04	1.02	0.389068	2.67514	15	5536	10	2454	0.967896	0.982774	not_significant	0.00859903	0.0141715	2.861	2.6	3.122	0.133	21.447	0	-0.0512	-0.058	-0.045	0.003	-15.784	0	TRUE
Appendiceal conditions	digestive	0.2573	-2.174	2.689	1.241	0.207	1.29343	0.113722	14.717	10	5541	10	2454	0.835734	0.930983	not_significant	0.111744	0.0779319	2.8615	2.6	3.123	0.133	21.452	0	-0.0513	-0.058	-0.045	0.003	-15.786	0	TRUE
Arrhythmia (cardiac) NOS	circulatory system	0.5001	-0.059	1.059	0.285	1.754	1.64889	0.942707	2.88349	52	5499	18	2446	0.0794869	0.382676	not_significant	0.217191	1.0997	2.8715	2.61	3.133	0.134	21.49	0	-0.0516	-0.058	-0.045	0.003	-15.852	0	TRUE
Arterial dissection	circulatory system	1.0978	-1.041	3.237	1.091	1.006	2.99756	0.353101	25.4572	10	5541	10	2454	0.314509	0.666205	not_significant	0.476768	0.502367	2.8615	2.6	3.123	0.133	21.453	0	-0.0513	-0.058	-0.045	0.003	-15.792	0	TRUE
Arterial embolism and thrombosis	circulatory system	0.2194	-1.975	2.413	1.119	0.196	1.24533	0.138761	11.1674	10	5541	10	2454	0.844633	0.932891	not_significant	0.0952842	0.0733322	2.8604	2.599	3.122	0.133	21.44	0	-0.0512	-0.058	-0.045	0.003	-15.778	0	TRUE
Arthralgia/ankylosis of temporomandibular joint	digestive	0.4595	-0.546	1.465	0.513	0.896	1.58328	0.579262	4.32754	18	5533	10	2454	0.370508	0.702655	not_significant	0.199558	0.431202	2.8597	2.598	3.121	0.133	21.44	0	-0.0512	-0.058	-0.045	0.003	-15.783	0	TRUE
Arthropathy NOS	musculoskeletal	1.2258	0.333	2.119	0.456	2.69	3.40689	1.39515	8.32281	34	5517	10	2454	0.00715163	0.0834421	not_significant	0.532358	2.14559	2.8761	2.614	3.138	0.134	21.521	0	-0.0517	-0.058	-0.045	0.003	-15.897	0	TRUE
Articular cartilage disorder	musculoskeletal	0.3224	-0.515	1.16	0.427	0.755	1.38044	0.597501	3.18993	20	5531	10	2454	0.450397	0.751572	not_significant	0.140017	0.346404	2.8633	2.602	3.125	0.133	21.46	0	-0.0513	-0.058	-0.045	0.003	-15.8	0	TRUE
Ascites (non malignant)	digestive	0.766	-0.281	1.813	0.534	1.434	2.15114	0.755028	6.12881	15	5536	10	2454	0.151448	0.474133	not_significant	0.33267	0.819736	2.8713	2.609	3.133	0.134	21.49	0	-0.0515	-0.058	-0.045	0.003	-15.84	0	TRUE
Aseptic necrosis of bone	musculoskeletal	1.7827	-0.341	3.907	1.084	1.645	5.94589	0.711059	49.7495	10	5541	10	2454	0.0999502	0.417851	not_significant	0.774217	1.00022	2.8652	2.604	3.127	0.133	21.473	0	-0.0514	-0.058	-0.045	0.003	-15.821	0	TRUE
Aspergillosis	infectious diseases	0.6666	-1.603	2.936	1.158	0.576	1.9476	0.201292	18.8403	10	5541	10	2454	0.564854	0.820353	not_significant	0.289501	0.248063	2.8625	2.601	3.124	0.133	21.458	0	-0.0513	-0.058	-0.045	0.003	-15.794	0	TRUE
Asphyxia and hypoxemia		1.0028	-0.102	2.107	0.563	1.78	2.7259	0.90303	8.22353	18	5533	10	2454	0.0751316	0.372738	not_significant	0.435511	1.12418	2.869	2.607	3.131	0.134	21.486	0	-0.0515	-0.058	-0.045	0.003	-15.84	0	TRUE
Asthma	respiratory	0.6008	0.271	0.93	0.168	3.573	1.82358	1.31128	2.53451	172	5379	49	2415	0.000352241	0.0112824	mi_significant	0.260924	3.45316	2.8746	2.613	3.136	0.134	21.517	0	-0.052	-0.058	-0.046	0.003	-15.954	0	TRUE
Asthma with exacerbation	respiratory	0.3241	-0.119	0.767	0.226	1.433	1.38279	0.887808	2.1533	79	5472	28	2436	0.151972	0.474133	not_significant	0.140755	0.818235	2.8623	2.601	3.124	0.133	21.456	0	-0.0514	-0.058	-0.045	0.003	-15.816	0	TRUE
Astigmatism	sense organs	0.8317	0.34	1.323	0.251	3.318	2.29722	1.40495	3.75467	98	5453	20	2444	0.000907292	0.020848	mi_significant	0.361203	3.04225	2.8582	2.596	3.12	0.134	21.396	0	-0.0514	-0.058	-0.045	0.003	-15.811	0	TRUE
Atherosclerosis	circulatory system	0.8323	-0.771	2.436	0.818	1.017	2.2986	0.46255	11.4272	10	5541	10	2454	0.308944	0.664976	not_significant	0.361463	0.51012	2.8649	2.603	3.126	0.133	21.469	0	-0.0514	-0.058	-0.045	0.003	-15.809	0	TRUE
Atherosclerosis of aorta	circulatory system	-1.6101	-3.9	0.68	1.168	-1.378	0.199868	0.0202419	1.97388	10	5541	10	2454	0.168151	0.497859	not_significant	-0.699258	0.774301	2.8584	2.597	3.12	0.133	21.429	0	-0.0512	-0.058	-0.045	0.003	-15.755	0	TRUE
Atherosclerosis of native arteries of the extremities with intermittent claudication	circulatory system	-0.5026	-2.544	1.539	1.042	-0.483	0.604956	0.0785516	4.65993	10	5541	10	2454	0.629419	0.84382	not_significant	-0.218276	0.20106	2.8601	2.599	3.122	0.133	21.443	0	-0.0512	-0.058	-0.045	0.003	-15.773	0	TRUE
Atherosclerosis of the extremities	circulatory system	0.737	-1.599	3.073	1.192	0.618	2.08966	0.202099	21.6066	10	5541	10	2454	0.536314	0.804753	not_significant	0.320075	0.270581	2.8631	2.602	3.125	0.133	21.457	0	-0.0513	-0.058	-0.045	0.003	-15.794	0	TRUE
Atopic/contact dermatitis due to other or unspecified	dermatologic	0.4367	0.201	0.673	0.12	3.631	1.54759	1.22262	1.96011	319	5232	98	2366	0.000282535	0.00963353	mi_significant	0.189656	3.54893	2.8543	2.593	3.116	0.134	21.37	0	-0.0516	-0.058	-0.045	0.003	-15.861	0	TRUE
Atrial fibrillation	circulatory system	0.9882	0.421	1.556	0.29	3.412	2.68639	1.52348	4.73982	64	5487	16	2448	0.000645332	0.0168809	mi_significant	0.42917	3.19022	2.901	2.638	3.164	0.134	21.617	0	-0.0525	-0.059	-0.046	0.003	-16.031	0	TRUE
Atrial flutter	circulatory system	2.3371	0.881	3.794	0.743	3.145	10.3512	2.41331	44.4338	27	5524	10	2454	0.00166011	0.0323606	mi_significant	1.01499	2.77986	2.8974	2.635	3.16	0.134	21.613	0	-0.0523	-0.059	-0.046	0.003	-16.012	0	TRUE
Atrioventricular [AV] block	circulatory system	0.1092	-1.713	1.932	0.93	0.117	1.11539	0.180324	6.9033	10	5541	10	2454	0.906543	0.96135	not_significant	0.047425	0.0426117	2.8616	2.6	3.123	0.133	21.446	0	-0.0513	-0.058	-0.045	0.003	-15.78	0	TRUE
Atrioventricular block, complete	circulatory system	-0.7234	-2.255	0.808	0.782	-0.926	0.4851	0.104874	2.24342	10	5541	10	2454	0.354651	0.696202	not_significant	-0.314169	0.450199	2.8583	2.597	3.12	0.133	21.424	0	-0.0512	-0.058	-0.045	0.003	-15.75	0	TRUE
Atrophic gastritis	digestive	0.5602	0	1.12	0.286	1.961	1.75102	1	3.06485	60	5491	16	2448	0.0498753	0.294515	not_significant	0.243292	1.30211	2.8593	2.598	3.121	0.133	21.431	0	-0.0513	-0.058	-0.045	0.003	-15.801	0	TRUE
Attention deficit hyperactivity disorder	mental disorders	-0.3318	-0.975	0.312	0.328	-1.011	0.717631	0.377192	1.36615	26	5525	15	2449	0.31221	0.664988	not_significant	-0.144099	0.505553	2.8646	2.603	3.126	0.133	21.468	0	-0.0513	-0.058	-0.045	0.003	-15.796	0	TRUE
Autism	mental disorders	-1.2218	-4.15	1.706	1.494	-0.818	0.294699	0.0157644	5.50689	10	5541	10	2454	0.413453	0.724823	not_significant	-0.530621	0.383573	2.8627	2.601	3.124	0.133	21.463	0	-0.0513	-0.058	-0.045	0.003	-15.795	0	TRUE
Back pain	symptoms	0.5813	0.36	0.802	0.113	5.154	1.78836	1.43333	2.23	394	5157	111	2353	2.55106e-07	5.39295e-05	mi_significant	0.252455	6.59328	2.8699	2.608	3.132	0.134	21.453	0	-0.0523	-0.059	-0.046	0.003	-16.024	0	TRUE
Bacteremia	infectious diseases	0.2259	-0.813	1.264	0.53	0.426	1.25345	0.443525	3.53955	14	5537	10	2454	0.669868	0.86453	not_significant	0.0981071	0.174011	2.8607	2.599	3.122	0.133	21.447	0	-0.0513	-0.058	-0.045	0.003	-15.785	0	TRUE
Bacterial enteritis	infectious diseases	0.2863	-0.402	0.974	0.351	0.815	1.33149	0.668981	2.64852	34	5517	11	2453	0.414871	0.724823	not_significant	0.124339	0.382087	2.8589	2.597	3.12	0.133	21.432	0	-0.0512	-0.058	-0.045	0.003	-15.779	0	TRUE
Bacterial infection NOS	infectious diseases	0.9199	0.177	1.663	0.379	2.428	2.50904	1.19363	5.27511	41	5510	10	2454	0.0152009	0.138511	not_significant	0.399507	1.81813	2.8704	2.609	3.132	0.134	21.491	0	-0.0516	-0.058	-0.045	0.003	-15.864	0	TRUE
Bacterial pneumonia	respiratory	0.2014	-1.003	1.406	0.614	0.328	1.22311	0.366777	4.0796	10	5541	10	2454	0.743044	0.907974	not_significant	0.0874669	0.128986	2.8611	2.6	3.122	0.133	21.454	0	-0.0513	-0.058	-0.045	0.003	-15.789	0	TRUE
Balanoposthitis	genitourinary	1.3613	0.157	2.565	0.614	2.216	3.90126	1.17	13.0007	26	5525	10	2454	0.0267015	0.191801	not_significant	0.591205	1.57346	2.8582	2.597	3.12	0.133	21.421	0	-0.0513	-0.058	-0.045	0.003	-15.782	0	TRUE
Barrett's esophagus	digestive	0.8732	-0.422	2.169	0.661	1.321	2.39456	0.655734	8.74953	13	5538	10	2454	0.186489	0.518274	not_significant	0.379226	0.729348	2.864	2.603	3.126	0.133	21.465	0	-0.0514	-0.058	-0.045	0.003	-15.81	0	TRUE
Basal cell carcinoma	neoplasms	0.0854	-0.433	0.603	0.264	0.323	1.08915	0.64856	1.82759	43	5508	23	2441	0.746619	0.911289	not_significant	0.0370887	0.126901	2.8631	2.601	3.125	0.134	21.443	0	-0.0513	-0.058	-0.045	0.003	-15.772	0	TRUE
Benign neoplasm of adrenal gland	neoplasms	1.2318	-0.888	3.351	1.081	1.139	3.42739	0.411478	28.5313	10	5541	10	2454	0.254636	0.611705	not_significant	0.534964	0.59408	2.8616	2.6	3.123	0.133	21.45	0	-0.0513	-0.058	-0.045	0.003	-15.791	0	TRUE
Benign neoplasm of bone and articular cartilage	neoplasms	0.3829	-0.973	1.738	0.692	0.554	1.46653	0.377947	5.68596	10	5541	10	2454	0.57989	0.827978	not_significant	0.166291	0.236654	2.8622	2.601	3.124	0.133	21.456	0	-0.0513	-0.058	-0.045	0.003	-15.792	0	TRUE
Benign neoplasm of brain, cranial nerves, meninges	neoplasms	1.0816	-0.436	2.599	0.774	1.397	2.94939	0.646618	13.4503	11	5540	10	2454	0.16247	0.489309	not_significant	0.469733	0.789226	2.8633	2.602	3.125	0.133	21.463	0	-0.0513	-0.058	-0.045	0.003	-15.807	0	TRUE
Benign neoplasm of colon	neoplasms	-0.0169	-0.221	0.187	0.104	-0.163	0.983242	0.801717	1.20563	285	5266	163	2301	0.870774	0.943928	not_significant	-0.00733958	0.0600946	2.8589	2.596	3.122	0.134	21.328	0	-0.0512	-0.058	-0.045	0.003	-15.584	0	TRUE
Benign neoplasm of eye, uveal	neoplasms	0.4351	-0.741	1.611	0.6	0.725	1.54512	0.476637	5.00782	11	5540	10	2454	0.468444	0.758263	not_significant	0.188962	0.329342	2.863	2.601	3.124	0.133	21.458	0	-0.0513	-0.058	-0.045	0.003	-15.797	0	TRUE
Benign neoplasm of kidney and other urinary organs	neoplasms	0.2014	-2.241	2.644	1.246	0.162	1.22311	0.106352	14.0694	10	5541	10	2454	0.871593	0.943928	not_significant	0.0874669	0.0596865	2.8614	2.6	3.123	0.133	21.452	0	-0.0513	-0.058	-0.045	0.003	-15.785	0	TRUE
Benign neoplasm of other parts of digestive system	neoplasms	-0.0642	-0.776	0.648	0.363	-0.177	0.937817	0.460243	1.91171	23	5528	12	2452	0.859645	0.939653	not_significant	-0.0278817	0.0656808	2.861	2.6	3.122	0.133	21.451	0	-0.0512	-0.058	-0.045	0.003	-15.78	0	TRUE
Benign neoplasm of pituitary gland and craniopharyngeal duct (pouch)	neoplasms	0.7063	-0.549	1.962	0.641	1.103	2.02648	0.577527	7.11354	14	5537	10	2454	0.270221	0.624997	not_significant	0.306742	0.568281	2.8594	2.598	3.121	0.133	21.437	0	-0.0512	-0.058	-0.045	0.003	-15.781	0	TRUE
Benign neoplasm of respiratory and intrathoracic organs	neoplasms	-0.1108	-1.521	1.299	0.719	-0.154	0.895118	0.218493	3.66563	10	5541	10	2454	0.877589	0.945578	not_significant	-0.0481198	0.0567088	2.8612	2.6	3.123	0.133	21.452	0	-0.0512	-0.058	-0.045	0.003	-15.785	0	TRUE
Benign neoplasm of skin	neoplasms	0.2225	0.019	0.426	0.104	2.141	1.2492	1.01918	1.53112	369	5182	141	2323	0.032301	0.21886	not_significant	0.0966305	1.49078	2.858	2.596	3.119	0.133	21.422	0	-0.0515	-0.058	-0.045	0.003	-15.848	0	TRUE
Benign neoplasm of unspecified sites	neoplasms	-0.5655	-1.308	0.177	0.379	-1.493	0.568076	0.27036	1.19363	15	5536	14	2450	0.135423	0.450132	not_significant	-0.245594	0.868308	2.8577	2.596	3.119	0.133	21.426	0	-0.0511	-0.057	-0.045	0.003	-15.737	0	TRUE
Bipolar	mental disorders	0.6496	-0.447	1.747	0.56	1.161	1.91477	0.639544	5.73736	18	5533	10	2454	0.245725	0.599841	not_significant	0.282118	0.609551	2.859	2.598	3.121	0.133	21.43	0	-0.0512	-0.058	-0.045	0.003	-15.777	0	TRUE
Bladder neck obstruction	genitourinary	0.6004	-1.112	2.313	0.874	0.687	1.82285	0.328901	10.1047	10	5541	10	2454	0.492078	0.7717	not_significant	0.26075	0.307966	2.864	2.602	3.126	0.133	21.462	0	-0.0513	-0.058	-0.045	0.003	-15.8	0	TRUE
Blindness and low vision	sense organs	0.2206	-0.599	1.04	0.418	0.528	1.24682	0.549361	2.82922	22	5529	10	2454	0.597807	0.830271	not_significant	0.0958054	0.223439	2.8605	2.599	3.122	0.133	21.446	0	-0.0513	-0.058	-0.045	0.003	-15.786	0	TRUE
Blister	injuries & poisonings	0.8387	-0.704	2.381	0.787	1.066	2.31336	0.494603	10.8157	10	5541	10	2454	0.286485	0.642855	not_significant	0.364243	0.542898	2.8608	2.599	3.122	0.133	21.445	0	-0.0513	-0.058	-0.045	0.003	-15.787	0	TRUE
Blood in stool	digestive	0.6048	0.082	1.128	0.267	2.266	1.83089	1.08546	3.08947	67	5484	19	2445	0.0234505	0.179795	not_significant	0.262661	1.62985	2.8668	2.605	3.128	0.133	21.484	0	-0.0515	-0.058	-0.045	0.003	-15.857	0	TRUE
Bone cancer	neoplasms	0.1798	-2.09	2.45	1.158	0.155	1.19698	0.123687	11.5883	10	5541	10	2454	0.8766	0.945476	not_significant	0.0780861	0.0571985	2.8609	2.599	3.122	0.133	21.449	0	-0.0512	-0.058	-0.045	0.003	-15.784	0	TRUE
Bone marrow or stem cell transplant	neoplasms	0.9312	-1.249	3.112	1.112	0.837	2.53755	0.286791	22.4659	10	5541	10	2454	0.402528	0.717491	not_significant	0.404415	0.395204	2.8607	2.599	3.122	0.133	21.44	0	-0.0513	-0.058	-0.045	0.003	-15.78	0	TRUE
Broken tooth	injuries & poisonings	-0.1106	-1.817	1.596	0.871	-0.127	0.895297	0.162513	4.93326	10	5541	10	2454	0.898885	0.956819	not_significant	-0.048033	0.046296	2.8612	2.6	3.123	0.133	21.452	0	-0.0512	-0.058	-0.045	0.003	-15.785	0	TRUE
Bronchitis	respiratory	0.6324	-0.074	1.339	0.361	1.754	1.88212	0.928672	3.81523	39	5512	10	2454	0.079512	0.382676	not_significant	0.274648	1.09957	2.8617	2.6	3.123	0.133	21.446	0	-0.0513	-0.058	-0.045	0.003	-15.806	0	TRUE
Bronchopneumonia and lung abscess	respiratory	-0.0317	-1.893	1.83	0.95	-0.033	0.968797	0.150619	6.23389	10	5541	10	2454	0.973409	0.985557	not_significant	-0.0137671	0.0117046	2.861	2.6	3.122	0.133	21.448	0	-0.0512	-0.058	-0.045	0.003	-15.78	0	TRUE
Burns		0.5575	-0.567	1.682	0.574	0.971	1.7463	0.567225	5.3763	14	5537	10	2454	0.331304	0.680706	not_significant	0.242119	0.479773	2.8617	2.6	3.123	0.133	21.454	0	-0.0513	-0.058	-0.045	0.003	-15.796	0	TRUE
Bursitis	musculoskeletal	0.063	-0.392	0.518	0.232	0.271	1.06503	0.675704	1.67867	62	5489	28	2436	0.786043	0.916968	not_significant	0.0273606	0.104554	2.8611	2.6	3.123	0.133	21.452	0	-0.0513	-0.058	-0.045	0.003	-15.787	0	TRUE
Bursitis disorders	musculoskeletal	-0.8549	-2.659	0.949	0.92	-0.929	0.425326	0.0700182	2.58313	10	5541	10	2454	0.352914	0.696113	not_significant	-0.371278	0.452331	2.8587	2.597	3.12	0.133	21.432	0	-0.0512	-0.058	-0.045	0.003	-15.759	0	TRUE
Calcaneal spur; Exostosis NOS	musculoskeletal	0.3358	-0.568	1.24	0.461	0.728	1.39906	0.566658	3.45561	17	5534	10	2454	0.466453	0.756904	not_significant	0.145836	0.331192	2.8637	2.602	3.125	0.133	21.46	0	-0.0513	-0.058	-0.045	0.003	-15.799	0	TRUE
Calculus of bile duct	digestive	0.5475	-0.464	1.559	0.516	1.061	1.72893	0.628764	4.75406	17	5534	10	2454	0.28889	0.642855	not_significant	0.237776	0.539268	2.8622	2.601	3.124	0.133	21.457	0	-0.0513	-0.058	-0.045	0.003	-15.8	0	TRUE
Calculus of kidney	genitourinary	0.3548	-0.06	0.77	0.212	1.677	1.4259	0.941765	2.15977	88	5463	32	2432	0.0935662	0.406994	not_significant	0.154088	1.02888	2.8666	2.605	3.128	0.133	21.475	0	-0.0515	-0.058	-0.045	0.003	-15.839	0	TRUE
Calculus of lower urinary tract	genitourinary	1.1856	-0.38	2.751	0.799	1.485	3.27265	0.683861	15.6583	10	5541	10	2454	0.137647	0.454665	not_significant	0.5149	0.861234	2.8697	2.608	3.131	0.134	21.486	0	-0.0515	-0.058	-0.045	0.003	-15.834	0	TRUE
Calculus of ureter	genitourinary	0.5571	-0.307	1.421	0.441	1.264	1.7456	0.735651	4.14126	24	5527	10	2454	0.2064	0.545412	not_significant	0.241945	0.68529	2.8629	2.601	3.124	0.133	21.458	0	-0.0513	-0.058	-0.045	0.003	-15.805	0	TRUE
Cancer of bladder	neoplasms	-0.1709	-2.963	2.621	1.424	-0.12	0.842906	0.0516637	13.7495	10	5541	10	2454	0.904524	0.960886	not_significant	-0.0742209	0.0435801	2.8607	2.599	3.122	0.133	21.443	0	-0.0512	-0.058	-0.045	0.003	-15.776	0	TRUE
Cancer of brain	neoplasms	1.2144	-0.339	2.768	0.793	1.532	3.36827	0.712482	15.9267	10	5541	10	2454	0.125516	0.443715	not_significant	0.527407	0.9013	2.8687	2.607	3.13	0.134	21.482	0	-0.0515	-0.058	-0.045	0.003	-15.831	0	TRUE
Cancer of connective tissue	neoplasms	0.435	-1.137	2.007	0.802	0.542	1.54496	0.32078	7.44096	10	5541	10	2454	0.587482	0.829869	not_significant	0.188918	0.231005	2.8599	2.598	3.121	0.133	21.439	0	-0.0512	-0.058	-0.045	0.003	-15.778	0	TRUE
Cancer of liver and intrahepatic bile duct	neoplasms	-1.1706	-3.947	1.606	1.416	-0.826	0.310181	0.0193126	4.98284	10	5541	10	2454	0.408574	0.723158	not_significant	-0.508385	0.388729	2.8631	2.602	3.125	0.133	21.461	0	-0.0513	-0.058	-0.045	0.003	-15.795	0	TRUE
Cancer of major salivary glands	neoplasms	-0.5296	-3.341	2.281	1.434	-0.369	0.58884	0.0354015	9.78646	10	5541	10	2454	0.711913	0.891317	not_significant	-0.230002	0.147573	2.8607	2.599	3.122	0.133	21.448	0	-0.0512	-0.058	-0.045	0.003	-15.78	0	TRUE
Cancer of prostate	neoplasms	1.3213	0.05	2.592	0.648	2.038	3.74829	1.05127	13.3565	13	5538	10	2454	0.0415706	0.25696	not_significant	0.573833	1.38121	2.8816	2.619	3.144	0.134	21.529	0	-0.0518	-0.058	-0.045	0.003	-15.893	0	TRUE
Cancer of tongue	neoplasms	-0.3759	-3.231	2.479	1.457	-0.258	0.686671	0.039518	11.9293	10	5541	10	2454	0.796379	0.917964	not_significant	-0.163251	0.0988802	2.8606	2.599	3.122	0.133	21.446	0	-0.0512	-0.058	-0.045	0.003	-15.778	0	TRUE
Cancer, suspected or other	neoplasms	1.715	0.227	3.203	0.759	2.26	5.55668	1.25483	24.6062	20	5531	10	2454	0.0238461	0.180038	not_significant	0.744815	1.62258	2.8677	2.606	3.13	0.134	21.47	0	-0.0515	-0.058	-0.045	0.003	-15.834	0	TRUE
Candidiasis	infectious diseases	1.3695	0.319	2.42	0.536	2.556	3.93338	1.37575	11.2459	33	5518	10	2454	0.0105883	0.106589	not_significant	0.594766	1.97517	2.8611	2.599	3.123	0.133	21.432	0	-0.0514	-0.058	-0.045	0.003	-15.803	0	TRUE
Carbuncle and furuncle	dermatologic	0.613	-0.3	1.526	0.466	1.316	1.84596	0.740818	4.59974	23	5528	10	2454	0.188184	0.519348	not_significant	0.266223	0.725418	2.8613	2.6	3.123	0.133	21.449	0	-0.0513	-0.058	-0.045	0.003	-15.797	0	TRUE
Carcinoma in situ of skin	neoplasms	0.1317	-1.12	1.383	0.638	0.206	1.14077	0.32628	3.98684	10	5541	10	2454	0.836614	0.930983	not_significant	0.0571966	0.0774749	2.862	2.6	3.124	0.133	21.447	0	-0.0513	-0.058	-0.045	0.003	-15.781	0	TRUE
Cardiac complications, not elsewhere classified	circulatory system	-2.0104	-4.235	0.214	1.135	-1.771	0.133935	0.0144798	1.23862	10	5541	10	2454	0.0765146	0.374426	not_significant	-0.873106	1.11626	2.8589	2.597	3.12	0.133	21.431	0	-0.0512	-0.058	-0.045	0.003	-15.755	0	TRUE
Cardiac conduction disorders	circulatory system	0.4233	-1.165	2.011	0.81	0.522	1.52699	0.311923	7.47078	10	5541	10	2454	0.601362	0.830271	not_significant	0.183837	0.220864	2.8606	2.599	3.122	0.133	21.447	0	-0.0512	-0.058	-0.045	0.003	-15.784	0	TRUE
Cardiac congenital anomalies	congenital anomalies	1.1941	0.125	2.263	0.545	2.19	3.30059	1.13315	9.61188	26	5525	10	2454	0.0285589	0.198597	not_significant	0.518591	1.54426	2.8644	2.603	3.126	0.134	21.455	0	-0.0514	-0.058	-0.045	0.003	-15.818	0	TRUE
Cardiac shunt/ heart septal defect	congenital anomalies	0.6199	-0.642	1.882	0.644	0.962	1.85874	0.526239	6.56662	13	5538	10	2454	0.335839	0.684066	not_significant	0.269219	0.473869	2.8594	2.598	3.121	0.133	21.438	0	-0.0512	-0.058	-0.045	0.003	-15.781	0	TRUE
Cardiogenic shock	symptoms	0.2847	-2.204	2.774	1.27	0.224	1.32936	0.110361	16.0226	10	5541	10	2454	0.822614	0.93007	not_significant	0.123644	0.0848038	2.8616	2.6	3.123	0.133	21.452	0	-0.0513	-0.058	-0.045	0.003	-15.786	0	TRUE
Cardiomegaly	circulatory system	0.3543	-0.257	0.965	0.312	1.137	1.42518	0.773368	2.62479	39	5512	15	2449	0.255732	0.611957	not_significant	0.153871	0.592215	2.8656	2.604	3.127	0.133	21.469	0	-0.0514	-0.058	-0.045	0.003	-15.816	0	TRUE
Cataplexy and narcolepsy	neurological	-0.531	-2.34	1.278	0.923	-0.575	0.588017	0.0963276	3.58945	10	5541	10	2454	0.565011	0.820353	not_significant	-0.23061	0.247943	2.8621	2.601	3.124	0.133	21.457	0	-0.0513	-0.058	-0.045	0.003	-15.789	0	TRUE
Cataract	sense organs	1.5751	0.836	2.314	0.377	4.179	4.83122	2.30712	10.1148	48	5503	10	2454	2.92628e-05	0.00181946	mi_significant	0.684057	4.53368	2.9426	2.678	3.208	0.135	21.765	0	-0.0535	-0.06	-0.047	0.003	-16.225	0	TRUE
Celiac disease	digestive	0.4127	-1.181	2.006	0.813	0.508	1.51089	0.306972	7.43352	10	5541	10	2454	0.611747	0.83304	not_significant	0.179233	0.213428	2.8606	2.599	3.122	0.133	21.447	0	-0.0512	-0.058	-0.045	0.003	-15.784	0	TRUE
Cellulitis and abscess of arm/hand	dermatologic	0.2963	-0.535	1.127	0.424	0.699	1.34487	0.585669	3.08638	23	5528	10	2454	0.484681	0.767898	not_significant	0.128681	0.314544	2.8606	2.599	3.122	0.133	21.45	0	-0.0513	-0.058	-0.045	0.003	-15.791	0	TRUE
Cellulitis and abscess of face/neck	dermatologic	-0.185	-1.055	0.685	0.444	-0.417	0.831104	0.348192	1.98377	15	5536	10	2454	0.676969	0.869261	not_significant	-0.0803445	0.169431	2.8617	2.6	3.123	0.133	21.455	0	-0.0512	-0.058	-0.045	0.003	-15.785	0	TRUE
Cellulitis and abscess of fingers/toes	dermatologic	0.4664	-0.073	1.006	0.275	1.693	1.59424	0.929601	2.73464	61	5490	18	2446	0.0903992	0.401479	not_significant	0.202555	1.04384	2.8599	2.598	3.121	0.133	21.439	0	-0.0513	-0.058	-0.045	0.003	-15.804	0	TRUE
Cellulitis and abscess of foot, toe	dermatologic	0.7275	-1.708	3.163	1.243	0.585	2.0699	0.181228	23.6414	10	5541	10	2454	0.558246	0.817266	not_significant	0.315949	0.253174	2.8643	2.603	3.126	0.133	21.456	0	-0.0513	-0.058	-0.045	0.003	-15.794	0	TRUE
Cellulitis and abscess of leg, except foot	dermatologic	0.8031	0.084	1.522	0.367	2.19	2.23245	1.08763	4.58138	38	5513	10	2454	0.0285138	0.198597	not_significant	0.348782	1.54495	2.8731	2.611	3.135	0.134	21.506	0	-0.0517	-0.058	-0.045	0.003	-15.873	0	TRUE
Cellulitis and abscess of oral soft tissues	digestive	-0.1862	-1.633	1.261	0.738	-0.252	0.830108	0.195343	3.52895	10	5541	10	2454	0.800812	0.920064	not_significant	-0.0808656	0.0964693	2.861	2.6	3.122	0.133	21.451	0	-0.0512	-0.058	-0.045	0.003	-15.782	0	TRUE
Cellulitis and abscess of trunk	dermatologic	0.3785	-0.619	1.376	0.509	0.744	1.46009	0.538483	3.95903	18	5533	10	2454	0.457075	0.752383	not_significant	0.16438	0.340012	2.8588	2.597	3.12	0.133	21.431	0	-0.0512	-0.058	-0.045	0.003	-15.775	0	TRUE
Central/nonobstroctive sleep apnea	neurological	0.1696	-0.818	1.158	0.504	0.336	1.18483	0.441313	3.18356	13	5538	10	2454	0.736532	0.904197	not_significant	0.0736563	0.132809	2.8619	2.6	3.123	0.133	21.453	0	-0.0513	-0.058	-0.045	0.003	-15.788	0	TRUE
Cerebral artery occlusion, with cerebral infarction	circulatory system	1.2964	0.191	2.402	0.564	2.299	3.65611	1.21046	11.0452	20	5531	10	2454	0.0215122	0.172261	not_significant	0.563019	1.66731	2.8805	2.618	3.143	0.134	21.532	0	-0.0518	-0.058	-0.045	0.003	-15.901	0	TRUE
Cerebral cysts	neurological	-1.6551	-3.305	-0.005	0.842	-1.966	0.191073	0.0366992	0.995012	10	5541	10	2454	0.0493179	0.29286	not_significant	-0.718801	1.307	2.8613	2.6	3.123	0.133	21.45	0	-0.0512	-0.058	-0.045	0.003	-15.772	0	TRUE
Cerebral edema and compression of brain	neurological	1.0293	-0.239	2.298	0.647	1.59	2.79911	0.787415	9.95425	15	5536	10	2454	0.11176	0.433	not_significant	0.447019	0.951712	2.8654	2.604	3.127	0.133	21.47	0	-0.0514	-0.058	-0.045	0.003	-15.819	0	TRUE
Cerebrovascular disease	circulatory system	0.9436	-1.478	3.365	1.235	0.764	2.56921	0.228093	28.9335	10	5541	10	2454	0.444957	0.747727	not_significant	0.4098	0.351682	2.8643	2.603	3.126	0.133	21.466	0	-0.0513	-0.058	-0.045	0.003	-15.804	0	TRUE
Certain early complications of trauma or procedure	injuries & poisonings	0.8482	-1.28	2.976	1.086	0.781	2.33544	0.278037	19.6092	10	5541	10	2454	0.43472	0.741128	not_significant	0.368369	0.36179	2.8595	2.598	3.121	0.133	21.438	0	-0.0512	-0.058	-0.045	0.003	-15.777	0	TRUE
Cervical radiculitis	symptoms	0.2569	-0.133	0.647	0.199	1.292	1.29292	0.875465	1.9098	95	5456	37	2427	0.196401	0.526893	not_significant	0.11157	0.706856	2.8638	2.602	3.125	0.133	21.464	0	-0.0514	-0.058	-0.045	0.003	-15.82	0	TRUE
Cervicalgia	symptoms	0.5179	0.242	0.794	0.141	3.677	1.6785	1.27379	2.21223	236	5315	70	2394	0.000236152	0.00832044	mi_significant	0.224921	3.62681	2.8669	2.605	3.129	0.134	21.458	0	-0.0518	-0.058	-0.045	0.003	-15.92	0	TRUE
Changes in skin texture	dermatologic	0.9155	-0.365	2.196	0.653	1.401	2.49802	0.694197	8.98899	13	5538	10	2454	0.161088	0.488787	not_significant	0.397597	0.792936	2.8655	2.604	3.127	0.133	21.469	0	-0.0514	-0.058	-0.045	0.003	-15.816	0	TRUE
Cholecystitis without cholelithiasis	digestive	0.7343	-0.374	1.843	0.566	1.298	2.08402	0.687977	6.31546	17	5534	10	2454	0.194126	0.524048	not_significant	0.318902	0.711916	2.8618	2.6	3.123	0.133	21.451	0	-0.0513	-0.058	-0.045	0.003	-15.798	0	TRUE
Cholelithiasis	digestive	1.1388	0.383	1.894	0.385	2.955	3.12302	1.46668	6.6459	52	5499	10	2454	0.0031278	0.0472297	mi_significant	0.494575	2.50476	2.8622	2.6	3.124	0.134	21.427	0	-0.0514	-0.058	-0.045	0.003	-15.815	0	TRUE
Cholelithiasis with other cholecystitis	digestive	0.4001	-0.614	1.414	0.517	0.773	1.49197	0.541182	4.11237	16	5535	10	2454	0.439426	0.743158	not_significant	0.173761	0.357114	2.8607	2.599	3.122	0.133	21.448	0	-0.0513	-0.058	-0.045	0.003	-15.789	0	TRUE
Cholesteatoma	sense organs	1.0125	-1.087	3.112	1.071	0.945	2.75247	0.337227	22.4659	10	5541	10	2454	0.344526	0.692327	not_significant	0.439723	0.462778	2.8589	2.598	3.12	0.133	21.435	0	-0.0512	-0.058	-0.045	0.003	-15.775	0	TRUE
Cholesterolosis of gallbladder	digestive	0.6324	-0.266	1.53	0.458	1.38	1.88212	0.766439	4.61818	26	5525	10	2454	0.167499	0.497322	not_significant	0.274648	0.775987	2.8582	2.597	3.12	0.133	21.426	0	-0.0512	-0.058	-0.045	0.003	-15.778	0	TRUE
Chondrocalcinosis	endocrine/metabolic	0.9934	-1.214	3.201	1.126	0.882	2.7004	0.297007	24.5571	10	5541	10	2454	0.37771	0.705371	not_significant	0.431428	0.422841	2.8639	2.602	3.125	0.133	21.464	0	-0.0513	-0.058	-0.045	0.003	-15.802	0	TRUE
Chondromalacia		0.0663	-1.308	1.441	0.701	0.095	1.06855	0.27036	4.22492	10	5541	10	2454	0.924668	0.968294	not_significant	0.0287937	0.0340141	2.8611	2.6	3.122	0.133	21.451	0	-0.0512	-0.058	-0.045	0.003	-15.785	0	TRUE
Chorioretinal scars	sense organs	-1.4327	-3.088	0.223	0.845	-1.696	0.238664	0.045593	1.24982	10	5541	10	2454	0.0898458	0.400705	not_significant	-0.622214	1.0465	2.8571	2.596	3.119	0.133	21.417	0	-0.0511	-0.057	-0.045	0.003	-15.738	0	TRUE
Chromosomal anomalies and genetic disorders	congenital anomalies	-1.2144	-3.661	1.232	1.248	-0.973	0.296888	0.0257068	3.42808	10	5541	10	2454	0.330634	0.680706	not_significant	-0.527407	0.480652	2.8596	2.598	3.121	0.133	21.439	0	-0.0512	-0.058	-0.045	0.003	-15.767	0	TRUE
Chronic airway obstruction	respiratory	1.0867	0.066	2.108	0.521	2.086	2.96448	1.06823	8.23176	22	5529	10	2454	0.0369907	0.241353	not_significant	0.471948	1.43191	2.8753	2.613	3.137	0.134	21.515	0	-0.0517	-0.058	-0.045	0.003	-15.878	0	TRUE
Chronic bronchitis	respiratory	0.488	-0.856	1.832	0.686	0.711	1.62905	0.424858	6.24637	10	5541	10	2454	0.476775	0.76415	not_significant	0.211936	0.321687	2.8625	2.601	3.124	0.133	21.456	0	-0.0513	-0.058	-0.045	0.003	-15.794	0	TRUE
Chronic dermatitis due to solar radiation	dermatologic	0.1903	-0.601	0.981	0.404	0.472	1.20961	0.548263	2.66712	18	5533	10	2454	0.637274	0.847069	not_significant	0.0826462	0.195674	2.8643	2.603	3.126	0.134	21.447	0	-0.0513	-0.058	-0.045	0.003	-15.783	0	TRUE
Chronic fatigue syndrome	symptoms	0.1207	-0.772	1.013	0.455	0.265	1.12829	0.462088	2.75385	18	5533	10	2454	0.79086	0.916968	not_significant	0.0524193	0.101901	2.8608	2.599	3.122	0.133	21.448	0	-0.0512	-0.058	-0.045	0.003	-15.785	0	TRUE
Chronic graft-versus-host disease	infectious diseases	-0.1731	-1.969	1.623	0.916	-0.189	0.841054	0.139596	5.06827	10	5541	10	2454	0.850166	0.93417	not_significant	-0.0751764	0.0704964	2.8612	2.6	3.123	0.133	21.454	0	-0.0512	-0.058	-0.045	0.003	-15.786	0	TRUE
Chronic hepatitis	infectious diseases	0.6185	-0.959	2.196	0.805	0.768	1.85614	0.383276	8.98899	10	5541	10	2454	0.44222	0.744896	not_significant	0.268611	0.354361	2.8619	2.601	3.123	0.133	21.457	0	-0.0513	-0.058	-0.045	0.003	-15.794	0	TRUE
Chronic kidney disease, Stage I or II	genitourinary	0.6169	-0.034	1.268	0.332	1.856	1.85317	0.966572	3.55374	38	5513	13	2451	0.0633863	0.340915	not_significant	0.267916	1.198	2.8757	2.614	3.138	0.134	21.507	0	-0.0517	-0.058	-0.045	0.003	-15.869	0	TRUE
Chronic Kidney Disease, Stage III	genitourinary	3.0604	1.021	5.099	1.04	2.942	21.3361	2.77597	163.858	22	5529	10	2454	0.00326457	0.0486007	mi_significant	1.32911	2.48617	2.9114	2.648	3.175	0.135	21.64	0	-0.0526	-0.059	-0.046	0.003	-16.057	0	TRUE
Chronic Kidney Disease, Stage IV	genitourinary	1.3296	-0.288	2.947	0.825	1.611	3.77953	0.749762	19.0487	10	5541	10	2454	0.107106	0.42469	not_significant	0.577438	0.970186	2.8726	2.611	3.134	0.134	21.501	0	-0.0516	-0.058	-0.045	0.003	-15.853	0	TRUE
Chronic laryngitis	respiratory	-1.5665	-4.004	0.871	1.243	-1.26	0.208775	0.0182425	2.3893	10	5541	10	2454	0.207743	0.546231	not_significant	-0.680322	0.682473	2.8623	2.601	3.124	0.133	21.458	0	-0.0513	-0.058	-0.045	0.003	-15.787	0	TRUE
Chronic lymphocytic thyroiditis	endocrine/metabolic	1.2323	-0.265	2.73	0.764	1.613	3.42911	0.767206	15.3329	14	5537	10	2454	0.10678	0.42469	not_significant	0.535181	0.971508	2.8623	2.601	3.124	0.133	21.449	0	-0.0513	-0.058	-0.045	0.003	-15.798	0	TRUE
Chronic osteomyelitis	musculoskeletal	0.7985	-1.461	3.058	1.153	0.693	2.22221	0.232004	21.2849	10	5541	10	2454	0.488457	0.767898	not_significant	0.346784	0.311173	2.8621	2.601	3.124	0.133	21.455	0	-0.0513	-0.058	-0.045	0.003	-15.792	0	TRUE
Chronic pain	neurological	0.0517	-0.126	0.229	0.091	0.571	1.05306	0.881615	1.25734	433	5118	204	2260	0.568143	0.820393	not_significant	0.022453	0.245542	2.8631	2.602	3.125	0.133	21.456	0	-0.0514	-0.058	-0.045	0.003	-15.776	0	TRUE
Chronic pain syndrome	neurological	1.1452	-0.135	2.426	0.653	1.753	3.14307	0.873716	11.3135	15	5536	10	2454	0.0796488	0.382676	not_significant	0.497354	1.09882	2.8698	2.608	3.132	0.134	21.482	0	-0.0515	-0.058	-0.045	0.003	-15.837	0	TRUE
Chronic pancreatitis	digestive	1.0894	-1.097	3.276	1.116	0.977	2.97249	0.333871	26.4697	10	5541	10	2454	0.328807	0.680136	not_significant	0.47312	0.483058	2.8615	2.6	3.123	0.133	21.451	0	-0.0513	-0.058	-0.045	0.003	-15.791	0	TRUE
Chronic passive congestion of liver	digestive	-1.2233	-3.661	1.214	1.244	-0.984	0.294258	0.0257068	3.36693	10	5541	10	2454	0.325349	0.67716	not_significant	-0.531272	0.487651	2.8597	2.598	3.121	0.133	21.44	0	-0.0512	-0.058	-0.045	0.003	-15.768	0	TRUE
Chronic pharyngitis and nasopharyngitis	respiratory	0.1796	-0.327	0.686	0.258	0.695	1.19674	0.721084	1.98576	52	5499	23	2441	0.487165	0.767898	not_significant	0.0779993	0.312324	2.8636	2.602	3.125	0.133	21.459	0	-0.0513	-0.058	-0.045	0.003	-15.798	0	TRUE
Chronic prostatitis	genitourinary	-0.2795	-1.681	1.122	0.715	-0.391	0.756162	0.186188	3.07099	10	5541	10	2454	0.695978	0.879457	not_significant	-0.121385	0.157404	2.8621	2.601	3.124	0.133	21.455	0	-0.0513	-0.058	-0.045	0.003	-15.789	0	TRUE
Chronic pulmonary heart disease	circulatory system	0.2231	-0.749	1.195	0.496	0.45	1.24995	0.472839	3.30356	15	5536	10	2454	0.652671	0.854862	not_significant	0.0968911	0.185306	2.8616	2.6	3.123	0.133	21.453	0	-0.0513	-0.058	-0.045	0.003	-15.789	0	TRUE
Chronic renal failure [CKD]	genitourinary	0.4045	-0.266	1.075	0.342	1.182	1.49855	0.766439	2.92999	31	5520	13	2451	0.237275	0.591508	not_significant	0.175672	0.624749	2.8693	2.607	3.131	0.134	21.479	0	-0.0515	-0.058	-0.045	0.003	-15.826	0	TRUE
Chronic sinusitis	respiratory	0.3612	0.004	0.718	0.182	1.982	1.43505	1.00401	2.05033	128	5423	42	2422	0.0474971	0.283641	not_significant	0.156867	1.32333	2.859	2.597	3.12	0.133	21.428	0	-0.0514	-0.058	-0.045	0.003	-15.814	0	TRUE
Chronic tonsillitis and adenoiditis	respiratory	0.195	-0.509	0.899	0.359	0.543	1.21531	0.601096	2.45714	30	5521	11	2453	0.587148	0.829869	not_significant	0.0846874	0.231252	2.8603	2.599	3.122	0.133	21.443	0	-0.0512	-0.058	-0.045	0.003	-15.785	0	TRUE
Chronic ulcer of leg or foot	dermatologic	0.9155	-0.225	2.056	0.582	1.574	2.49802	0.798516	7.81465	15	5536	10	2454	0.115521	0.433	not_significant	0.397597	0.937338	2.87	2.608	3.132	0.134	21.489	0	-0.0515	-0.058	-0.045	0.003	-15.84	0	TRUE
Chronic ulcer of unspecified site	dermatologic	1.2719	-0.849	3.393	1.082	1.175	3.56762	0.427843	29.7551	10	5541	10	2454	0.239935	0.593936	not_significant	0.552379	0.619907	2.8621	2.601	3.124	0.133	21.453	0	-0.0513	-0.058	-0.045	0.003	-15.795	0	TRUE
Chronic venous insufficiency [CVI]	circulatory system	1.0598	0.142	1.978	0.468	2.263	2.88579	1.15258	7.22827	26	5525	10	2454	0.0236306	0.179795	not_significant	0.460265	1.62652	2.8777	2.616	3.14	0.134	21.524	0	-0.0518	-0.058	-0.045	0.003	-15.892	0	TRUE
Circadian rhythm sleep disorder	neurological	-0.1547	-0.784	0.475	0.321	-0.482	0.856672	0.456576	1.60801	28	5523	16	2448	0.629872	0.84382	not_significant	-0.0671854	0.200748	2.8608	2.599	3.122	0.133	21.449	0	-0.0512	-0.058	-0.045	0.003	-15.773	0	TRUE
Circulatory disease NEC	circulatory system	1.0502	-0.293	2.393	0.685	1.533	2.85822	0.746022	10.9463	11	5540	10	2454	0.125378	0.443715	not_significant	0.456096	0.901777	2.872	2.61	3.134	0.134	21.495	0	-0.0516	-0.058	-0.045	0.003	-15.846	0	TRUE
Circumscribed scleroderma	dermatologic	-0.914	-3.709	1.881	1.426	-0.641	0.400917	0.024502	6.56006	10	5541	10	2454	0.521564	0.797283	not_significant	-0.396945	0.282693	2.8617	2.6	3.123	0.133	21.455	0	-0.0513	-0.058	-0.045	0.003	-15.788	0	TRUE
Cirrhosis of liver without mention of alcohol	digestive	2.1388	0.65	3.628	0.76	2.815	8.48924	1.91554	37.6375	20	5531	10	2454	0.0048797	0.06896	not_significant	0.928869	2.31161	2.8941	2.631	3.157	0.134	21.591	0	-0.0522	-0.059	-0.046	0.003	-15.979	0	TRUE
Colon cancer	neoplasms	1.6457	-0.493	3.784	1.091	1.508	5.18464	0.610791	43.9917	10	5541	10	2454	0.131491	0.447603	not_significant	0.714718	0.881103	2.8664	2.605	3.128	0.133	21.478	0	-0.0514	-0.058	-0.045	0.003	-15.824	0	TRUE
Complex regional/central pain syndrome	neurological	-0.612	-2.036	0.812	0.727	-0.842	0.542265	0.13055	2.25241	10	5541	10	2454	0.399705	0.717068	not_significant	-0.265788	0.398261	2.8599	2.598	3.121	0.133	21.441	0	-0.0512	-0.058	-0.045	0.003	-15.768	0	TRUE
Complication due to other implant and internal device	injuries & poisonings	1.1506	-0.118	2.419	0.647	1.778	3.16009	0.888696	11.2346	15	5536	10	2454	0.0754645	0.372738	not_significant	0.499699	1.12226	2.8701	2.608	3.132	0.134	21.486	0	-0.0515	-0.058	-0.045	0.003	-15.84	0	TRUE
Complication of internal orthopedic device	injuries & poisonings	-0.253	-1.243	0.737	0.505	-0.501	0.776468	0.288517	2.08966	11	5540	10	2454	0.616561	0.835715	not_significant	-0.109877	0.210024	2.8606	2.599	3.122	0.133	21.449	0	-0.0512	-0.058	-0.045	0.003	-15.776	0	TRUE
Complications of cardiac/vascular device, implant, and graft	injuries & poisonings	0.7947	-0.497	2.086	0.659	1.206	2.21378	0.608353	8.05264	12	5539	10	2454	0.227915	0.577318	not_significant	0.345134	0.642227	2.8637	2.602	3.125	0.133	21.465	0	-0.0513	-0.058	-0.045	0.003	-15.808	0	TRUE
Complications of surgical and medical procedures		1.1324	0.311	1.953	0.419	2.704	3.10309	1.36479	7.04981	42	5509	10	2454	0.00685883	0.0833308	not_significant	0.491795	2.16375	2.8667	2.605	3.128	0.134	21.467	0	-0.0515	-0.058	-0.045	0.003	-15.845	0	TRUE
Complications of transplants and reattached limbs	injuries & poisonings	0.6444	0.073	1.215	0.291	2.212	1.90484	1.07573	3.37029	59	5492	16	2448	0.026988	0.191801	not_significant	0.279859	1.56883	2.8671	2.605	3.129	0.134	21.471	0	-0.0515	-0.058	-0.045	0.003	-15.845	0	TRUE
Concussion	injuries & poisonings	0.3665	-0.437	1.17	0.41	0.894	1.44268	0.645971	3.22199	25	5526	10	2454	0.371336	0.702655	not_significant	0.159169	0.430233	2.8603	2.599	3.122	0.133	21.445	0	-0.0513	-0.058	-0.045	0.003	-15.789	0	TRUE
Conduct disorders	mental disorders	0.3457	-2.007	2.698	1.2	0.288	1.41298	0.134391	14.85	10	5541	10	2454	0.77335	0.914257	not_significant	0.150136	0.111624	2.8612	2.6	3.123	0.133	21.451	0	-0.0513	-0.058	-0.045	0.003	-15.786	0	TRUE
Conductive hearing loss	sense organs	0.7578	-0.142	1.658	0.459	1.651	2.13358	0.867621	5.2488	26	5525	10	2454	0.0987491	0.416947	not_significant	0.329108	1.00547	2.862	2.601	3.124	0.133	21.453	0	-0.0513	-0.058	-0.045	0.003	-15.806	0	TRUE
Congenital anomalies of esophagus	congenital anomalies	-1.2905	-3.702	1.121	1.231	-1.049	0.275133	0.0246741	3.06792	10	5541	10	2454	0.294322	0.653568	not_significant	-0.560457	0.531177	2.8601	2.599	3.122	0.133	21.444	0	-0.0512	-0.058	-0.045	0.003	-15.773	0	TRUE
Congenital anomalies of face and neck	congenital anomalies	1.26	-0.862	3.382	1.082	1.164	3.52542	0.422317	29.4296	10	5541	10	2454	0.244417	0.599841	not_significant	0.547211	0.611868	2.8622	2.601	3.124	0.133	21.452	0	-0.0513	-0.058	-0.045	0.003	-15.794	0	TRUE
Congenital anomalies of great vessels	congenital anomalies	-0.1173	-1.588	1.353	0.75	-0.156	0.889318	0.204334	3.86902	10	5541	10	2454	0.875742	0.945476	not_significant	-0.0509427	0.057624	2.8609	2.599	3.122	0.133	21.45	0	-0.0512	-0.058	-0.045	0.003	-15.781	0	TRUE
Congenital anomalies of male genital organs	congenital anomalies	1.9658	-0.061	3.993	1.034	1.901	7.14062	0.940823	54.2173	17	5534	10	2454	0.0573607	0.319107	not_significant	0.853736	1.24139	2.8572	2.596	3.119	0.133	21.408	0	-0.0512	-0.058	-0.045	0.003	-15.764	0	TRUE
Congenital anomalies of mouth/tongue	congenital anomalies	0.5179	-1.682	2.718	1.123	0.461	1.6785	0.186002	15.15	10	5541	10	2454	0.644548	0.847372	not_significant	0.224921	0.190745	2.8606	2.599	3.122	0.133	21.448	0	-0.0512	-0.058	-0.045	0.003	-15.783	0	TRUE
Congenital anomalies of peripheral vascular system	congenital anomalies	0.2032	-1.127	1.534	0.679	0.299	1.22532	0.324004	4.63669	10	5541	10	2454	0.764693	0.914093	not_significant	0.0882486	0.116513	2.8605	2.599	3.122	0.133	21.445	0	-0.0512	-0.058	-0.045	0.003	-15.782	0	TRUE
Congenital anomalies of skin	dermatologic	0.3036	-0.708	1.315	0.516	0.588	1.35473	0.492628	3.72475	17	5534	10	2454	0.556383	0.816801	not_significant	0.131852	0.254626	2.8594	2.598	3.121	0.133	21.433	0	-0.0512	-0.058	-0.045	0.003	-15.776	0	TRUE
Congenital deformities of feet	congenital anomalies	-0.2253	-1.108	0.657	0.45	-0.501	0.798277	0.330219	1.929	14	5537	10	2454	0.616707	0.835715	not_significant	-0.0978465	0.209921	2.8615	2.6	3.123	0.133	21.454	0	-0.0512	-0.058	-0.045	0.003	-15.783	0	TRUE
Congenital musculoskeletal deformities of spine	congenital anomalies	-1.5505	-4.04	0.939	1.27	-1.221	0.212142	0.0175975	2.55742	10	5541	10	2454	0.222226	0.57062	not_significant	-0.673374	0.653204	2.8617	2.6	3.123	0.133	21.456	0	-0.0512	-0.058	-0.045	0.003	-15.785	0	TRUE
Congenital osteodystrophies	congenital anomalies	0.4538	-0.117	1.025	0.291	1.558	1.57428	0.889585	2.7871	54	5497	16	2448	0.119194	0.438984	not_significant	0.197083	0.923744	2.8595	2.598	3.121	0.133	21.439	0	-0.0513	-0.058	-0.045	0.003	-15.799	0	TRUE
Congestive heart failure (CHF) NOS	circulatory system	0.8272	-0.183	1.837	0.515	1.605	2.28691	0.832768	6.27768	20	5531	10	2454	0.108502	0.426368	not_significant	0.359248	0.964561	2.8675	2.606	3.129	0.134	21.471	0	-0.0515	-0.058	-0.045	0.003	-15.825	0	TRUE
Conjunctivitis, infectious	sense organs	0.0037	-0.35	0.357	0.18	0.021	1.00371	0.704688	1.42904	103	5448	47	2417	0.983615	0.993009	not_significant	0.00160689	0.00717503	2.8611	2.6	3.123	0.133	21.449	0	-0.0512	-0.058	-0.045	0.003	-15.785	0	TRUE
Conjunctivitis, noninfectious	sense organs	-0.5121	-2.325	1.301	0.925	-0.554	0.599236	0.0977834	3.67297	10	5541	10	2454	0.579884	0.827978	not_significant	-0.222402	0.236659	2.862	2.601	3.123	0.133	21.456	0	-0.0513	-0.058	-0.045	0.003	-15.788	0	TRUE
Constipation	digestive	0.2717	-0.088	0.631	0.184	1.481	1.31219	0.915761	1.87949	120	5431	43	2421	0.1387	0.456717	not_significant	0.117998	0.857922	2.8598	2.598	3.121	0.133	21.437	0	-0.0513	-0.058	-0.045	0.003	-15.808	0	TRUE
Contact and allergic dermatitis of eyelid	dermatologic	0.4096	-1.869	2.689	1.163	0.352	1.50622	0.154278	14.717	10	5541	10	2454	0.724668	0.897976	not_significant	0.177887	0.139861	2.8612	2.6	3.123	0.133	21.452	0	-0.0513	-0.058	-0.045	0.003	-15.787	0	TRUE
Contact dermatitis and other eczema due to plants [except food]	dermatologic	-0.5748	-1.329	0.179	0.385	-1.494	0.562817	0.264742	1.19602	15	5536	13	2451	0.135207	0.450132	not_significant	-0.249632	0.869002	2.8605	2.599	3.122	0.133	21.446	0	-0.0512	-0.058	-0.045	0.003	-15.762	0	TRUE
Contracture of joint	musculoskeletal	0.781	-0.516	2.078	0.662	1.18	2.18365	0.596903	7.98848	13	5538	10	2454	0.237915	0.591708	not_significant	0.339184	0.623578	2.8626	2.601	3.124	0.133	21.452	0	-0.0513	-0.058	-0.045	0.003	-15.797	0	TRUE
Contracture of palmar fascia [Dupuytren's disease]	musculoskeletal	-0.9522	-2.153	0.248	0.612	-1.555	0.385891	0.116135	1.28146	10	5541	10	2454	0.119991	0.440382	not_significant	-0.413535	0.920853	2.8618	2.6	3.123	0.133	21.455	0	-0.0512	-0.058	-0.045	0.003	-15.778	0	TRUE
Contusion	injuries & poisonings	0.209	-0.175	0.593	0.196	1.068	1.23244	0.839457	1.80941	96	5455	39	2425	0.285561	0.642855	not_significant	0.0907675	0.544301	2.8633	2.602	3.125	0.133	21.46	0	-0.0514	-0.058	-0.045	0.003	-15.811	0	TRUE
Convulsions	neurological	0.9517	-0.131	2.035	0.552	1.723	2.59011	0.877218	7.65225	21	5530	10	2454	0.0849723	0.390503	not_significant	0.413318	1.07072	2.8621	2.601	3.124	0.133	21.452	0	-0.0513	-0.058	-0.045	0.003	-15.804	0	TRUE
Corneal opacity	sense organs	0.2642	-0.985	1.514	0.637	0.414	1.30239	0.373439	4.54487	10	5541	10	2454	0.678591	0.869261	not_significant	0.114741	0.168392	2.8628	2.601	3.124	0.133	21.453	0	-0.0513	-0.058	-0.045	0.003	-15.789	0	TRUE
Corneal opacity and other disorders of cornea	sense organs	0.3838	-0.833	1.601	0.621	0.618	1.46785	0.434743	4.95799	10	5541	10	2454	0.536481	0.804753	not_significant	0.166682	0.270446	2.8639	2.602	3.125	0.133	21.458	0	-0.0513	-0.058	-0.045	0.003	-15.795	0	TRUE
Corns and callosities	dermatologic	0.4111	-0.153	0.976	0.288	1.427	1.50848	0.85813	2.65382	49	5502	17	2447	0.153489	0.47717	not_significant	0.178538	0.813923	2.865	2.603	3.127	0.133	21.47	0	-0.0514	-0.058	-0.045	0.003	-15.823	0	TRUE
Coronary atherosclerosis	circulatory system	0.7063	0.3	1.113	0.208	3.403	2.02648	1.34986	3.04348	104	5447	33	2431	0.000665778	0.0168809	mi_significant	0.306742	3.17667	2.9047	2.642	3.168	0.134	21.636	0	-0.0526	-0.059	-0.046	0.003	-16.057	0	TRUE
Costochondritis		-0.3657	-2.174	1.442	0.922	-0.396	0.693711	0.113722	4.22915	10	5541	10	2454	0.691772	0.876742	not_significant	-0.158821	0.160037	2.8612	2.6	3.123	0.133	21.453	0	-0.0512	-0.058	-0.045	0.003	-15.784	0	TRUE
Cough	respiratory	0.6301	0.408	0.852	0.113	5.56	1.8778	1.50381	2.34433	402	5149	108	2356	2.69192e-08	9.48453e-06	mi_significant	0.273649	7.56994	2.8685	2.606	3.131	0.134	21.448	0	-0.0523	-0.059	-0.046	0.003	-16.04	0	TRUE
Crushing injury		-1.3333	-3.129	0.463	0.916	-1.455	0.263606	0.0437615	1.58883	10	5541	10	2454	0.145694	0.467623	not_significant	-0.579045	0.836558	2.8637	2.602	3.125	0.133	21.466	0	-0.0513	-0.058	-0.045	0.003	-15.795	0	TRUE
Cyst and pseudocyst of pancreas	digestive	0.151	-1.318	1.62	0.75	0.201	1.163	0.26767	5.05309	10	5541	10	2454	0.840342	0.930983	not_significant	0.0655785	0.0755442	2.8619	2.6	3.123	0.133	21.448	0	-0.0513	-0.058	-0.045	0.003	-15.782	0	TRUE
Cyst of bone	musculoskeletal	-0.3532	-1.608	0.902	0.64	-0.552	0.702437	0.200288	2.46453	10	5541	10	2454	0.581229	0.827978	not_significant	-0.153393	0.235652	2.8621	2.601	3.124	0.133	21.458	0	-0.0513	-0.058	-0.045	0.003	-15.79	0	TRUE
Cyst of kidney, acquired	genitourinary	1.0134	0.194	1.833	0.418	2.424	2.75495	1.2141	6.25262	39	5512	10	2454	0.0153566	0.138735	not_significant	0.440114	1.8137	2.8632	2.602	3.125	0.133	21.449	0	-0.0514	-0.058	-0.045	0.003	-15.82	0	TRUE
Cyst of the salivary gland	digestive	-0.6833	-3.538	2.171	1.457	-0.469	0.504948	0.0290714	8.76705	10	5541	10	2454	0.638955	0.847069	not_significant	-0.296753	0.19453	2.8609	2.6	3.122	0.133	21.451	0	-0.0512	-0.058	-0.045	0.003	-15.782	0	TRUE
Cystic kidney disease	congenital anomalies	0.5439	-0.82	1.908	0.696	0.781	1.72271	0.440432	6.7396	10	5541	10	2454	0.43453	0.741128	not_significant	0.236213	0.36198	2.8631	2.602	3.125	0.133	21.46	0	-0.0513	-0.058	-0.045	0.003	-15.799	0	TRUE
Cystitis	genitourinary	-0.7853	-2.768	1.198	1.012	-0.776	0.455983	0.0627875	3.31348	10	5541	10	2454	0.437644	0.741841	not_significant	-0.341051	0.358879	2.8614	2.6	3.123	0.133	21.454	0	-0.0512	-0.058	-0.045	0.003	-15.784	0	TRUE
Cystoid macular degeneration of retina	sense organs	1.9608	-0.186	4.108	1.095	1.79	7.10501	0.830274	60.8249	10	5541	10	2454	0.073481	0.370823	not_significant	0.851565	1.13383	2.8775	2.615	3.14	0.134	21.521	0	-0.0517	-0.058	-0.045	0.003	-15.878	0	TRUE
Cysts of the jaws	digestive	-0.2122	-2.626	2.201	1.231	-0.172	0.808803	0.0723674	9.03404	10	5541	10	2454	0.8632	0.940621	not_significant	-0.0921573	0.0638884	2.8613	2.6	3.123	0.133	21.452	0	-0.0512	-0.058	-0.045	0.003	-15.786	0	TRUE
Decreased libido	mental disorders	0.3277	-0.108	0.763	0.222	1.475	1.38777	0.897628	2.1447	80	5471	29	2435	0.140269	0.459024	not_significant	0.142318	0.853038	2.8641	2.603	3.126	0.133	21.463	0	-0.0514	-0.058	-0.045	0.003	-15.823	0	TRUE
Decreased white blood cell count	hematopoietic	0.3439	-0.257	0.945	0.306	1.122	1.41044	0.773368	2.57281	42	5509	15	2449	0.261792	0.618041	not_significant	0.149354	0.582043	2.8629	2.601	3.124	0.133	21.458	0	-0.0513	-0.058	-0.045	0.003	-15.806	0	TRUE
Decubitus ulcer	dermatologic	1.2503	-0.865	3.366	1.079	1.158	3.49139	0.421052	28.9624	10	5541	10	2454	0.246667	0.600753	not_significant	0.542998	0.607889	2.8616	2.6	3.123	0.133	21.453	0	-0.0513	-0.058	-0.045	0.003	-15.794	0	TRUE
Deep vein thrombosis [DVT]	circulatory system	0.9771	0.06	1.895	0.468	2.087	2.65674	1.06184	6.65255	28	5523	10	2454	0.0368668	0.241353	not_significant	0.424349	1.43336	2.8689	2.607	3.131	0.134	21.49	0	-0.0515	-0.058	-0.045	0.003	-15.851	0	TRUE
Deficiency anemias	hematopoietic	0.772	-0.934	2.478	0.871	0.887	2.16409	0.392979	11.9174	10	5541	10	2454	0.375246	0.702655	not_significant	0.335275	0.425684	2.8666	2.605	3.128	0.134	21.468	0	-0.0514	-0.058	-0.045	0.003	-15.809	0	TRUE
Deficiency of humoral immunity	endocrine/metabolic	0.17	-1.485	1.825	0.844	0.201	1.1853	0.226502	6.2028	10	5541	10	2454	0.840469	0.930983	not_significant	0.0738301	0.0754782	2.8608	2.599	3.122	0.133	21.448	0	-0.0512	-0.058	-0.045	0.003	-15.783	0	TRUE
Degeneration of intervertebral disc	musculoskeletal	0.364	-0.021	0.749	0.196	1.855	1.43907	0.979219	2.11488	103	5448	38	2426	0.0635385	0.340915	not_significant	0.158083	1.19696	2.8693	2.608	3.131	0.134	21.492	0	-0.0516	-0.058	-0.045	0.003	-15.861	0	TRUE
Degenerative and vascular disorders of ear	sense organs	0.4129	-0.881	1.707	0.66	0.625	1.51119	0.414368	5.5124	11	5540	10	2454	0.531816	0.804753	not_significant	0.17932	0.274239	2.8599	2.598	3.121	0.133	21.44	0	-0.0512	-0.058	-0.045	0.003	-15.78	0	TRUE
Delirium due to conditions classified elsewhere	mental disorders	0.3896	-0.728	1.507	0.57	0.683	1.47639	0.482874	4.51317	10	5541	10	2454	0.494506	0.772508	not_significant	0.169201	0.305828	2.8656	2.604	3.127	0.134	21.457	0	-0.0514	-0.058	-0.045	0.003	-15.797	0	TRUE
Dementia with cerebral degenerations	mental disorders	-1.3409	-3.631	0.949	1.168	-1.148	0.26161	0.0264897	2.58313	10	5541	10	2454	0.251137	0.605922	not_significant	-0.582345	0.60009	2.8563	2.595	3.118	0.133	21.408	0	-0.0511	-0.057	-0.045	0.003	-15.734	0	TRUE
Dementias	mental disorders	1.9003	-0.308	4.109	1.127	1.687	6.6879	0.734915	60.8858	10	5541	10	2454	0.0916706	0.403733	not_significant	0.82529	1.03777	2.8776	2.615	3.14	0.134	21.505	0	-0.0517	-0.058	-0.045	0.003	-15.864	0	TRUE
Dental caries	digestive	-0.0913	-2.371	2.188	1.163	-0.079	0.912744	0.0933873	8.91736	10	5541	10	2454	0.937405	0.976448	not_significant	-0.0396511	0.0280728	2.8614	2.6	3.123	0.133	21.448	0	-0.0513	-0.058	-0.045	0.003	-15.784	0	TRUE
Dentofacial anomalies, including malocclusion	digestive	-0.3352	-1.449	0.778	0.568	-0.59	0.715195	0.234805	2.17711	10	5541	10	2454	0.555195	0.816801	not_significant	-0.145576	0.255554	2.8624	2.601	3.124	0.133	21.459	0	-0.0513	-0.058	-0.045	0.003	-15.791	0	TRUE
Dependence on respirator [Ventilator] or supplemental oxygen	respiratory	1.1067	-0.216	2.43	0.675	1.639	3.02436	0.805735	11.3589	12	5539	10	2454	0.101137	0.418707	not_significant	0.480634	0.99509	2.8723	2.61	3.134	0.134	21.501	0	-0.0516	-0.058	-0.045	0.003	-15.853	0	TRUE
Depression		0.8277	0.089	1.566	0.377	2.196	2.28805	1.09308	4.78746	41	5510	10	2454	0.0280842	0.1979	not_significant	0.359466	1.55154	2.8652	2.603	3.127	0.134	21.452	0	-0.0515	-0.058	-0.045	0.003	-15.822	0	TRUE
Dermatitis due to solar radiation	dermatologic	0.7867	-0.236	1.81	0.522	1.507	2.19614	0.789781	6.11045	17	5534	10	2454	0.131809	0.447603	not_significant	0.341659	0.880054	2.8695	2.608	3.131	0.134	21.486	0	-0.0515	-0.058	-0.045	0.003	-15.837	0	TRUE
Dermatochalasis	sense organs	0.5466	-0.526	1.619	0.547	0.999	1.72737	0.590964	5.04804	12	5539	10	2454	0.317792	0.671732	not_significant	0.237385	0.497857	2.8677	2.606	3.129	0.134	21.471	0	-0.0514	-0.058	-0.045	0.003	-15.814	0	TRUE
Dermatomycoses	infectious diseases	0.1376	-0.408	0.683	0.278	0.495	1.14752	0.664979	1.97981	47	5504	19	2445	0.620925	0.837139	not_significant	0.0597589	0.206961	2.8607	2.599	3.122	0.133	21.448	0	-0.0513	-0.058	-0.045	0.003	-15.789	0	TRUE
Dermatophytosis	infectious diseases	2.3804	0.355	4.405	1.033	2.304	10.8092	1.42618	81.8591	19	5532	10	2454	0.0212283	0.171285	not_significant	1.03379	1.67309	2.8703	2.608	3.132	0.134	21.48	0	-0.0516	-0.058	-0.045	0.003	-15.848	0	TRUE
Dermatophytosis of nail	infectious diseases	0.1032	-0.27	0.476	0.19	0.542	1.10871	0.763379	1.60962	91	5460	43	2421	0.588053	0.829869	not_significant	0.0448192	0.230584	2.8634	2.602	3.125	0.133	21.455	0	-0.0513	-0.058	-0.045	0.003	-15.788	0	TRUE
Dermatophytosis of the body	infectious diseases	0.6421	0.124	1.16	0.264	2.428	1.90047	1.13202	3.18993	73	5478	19	2445	0.0151797	0.138511	not_significant	0.27886	1.81874	2.8639	2.602	3.126	0.133	21.455	0	-0.0515	-0.058	-0.045	0.003	-15.837	0	TRUE
Develomental delays and disorders	mental disorders	-0.0215	-1.758	1.715	0.886	-0.024	0.978729	0.172389	5.55668	10	5541	10	2454	0.980608	0.99092	not_significant	-0.00933733	0.00850462	2.8611	2.6	3.123	0.133	21.452	0	-0.0512	-0.058	-0.045	0.003	-15.785	0	TRUE
Diabetes mellitus	endocrine/metabolic	0.9547	-0.056	1.965	0.516	1.852	2.59789	0.945539	7.13491	21	5530	10	2454	0.0640753	0.342058	not_significant	0.414621	1.19331	2.8706	2.609	3.132	0.134	21.493	0	-0.0515	-0.058	-0.045	0.003	-15.85	0	TRUE
Diabetes type 2 with peripheral circulatory disorders	endocrine/metabolic	1.6124	0.065	3.16	0.789	2.042	5.01483	1.06716	23.5706	11	5540	10	2454	0.0411152	0.256419	not_significant	0.700256	1.386	2.8814	2.619	3.144	0.134	21.527	0	-0.0518	-0.058	-0.045	0.003	-15.892	0	TRUE
Diabetic retinopathy	endocrine/metabolic	1.0425	0.129	1.956	0.466	2.238	2.8363	1.13769	7.07099	25	5526	10	2454	0.0252287	0.189126	not_significant	0.452752	1.5981	2.8783	2.616	3.14	0.134	21.53	0	-0.0518	-0.058	-0.045	0.003	-15.896	0	TRUE
Diaphragmatic hernia	digestive	0.08	-0.454	0.614	0.272	0.294	1.08329	0.635083	1.84781	47	5504	20	2444	0.768982	0.914093	not_significant	0.0347436	0.114084	2.8608	2.599	3.122	0.133	21.449	0	-0.0513	-0.058	-0.045	0.003	-15.787	0	TRUE
Diarrhea	digestive	0.1628	-0.124	0.45	0.147	1.111	1.1768	0.88338	1.56831	176	5375	70	2394	0.266569	0.622811	not_significant	0.0707031	0.574191	2.8597	2.598	3.121	0.133	21.436	0	-0.0513	-0.058	-0.045	0.003	-15.803	0	TRUE
Difficulty in walking	musculoskeletal	1.0675	-0.499	2.634	0.799	1.335	2.9081	0.607137	13.9294	10	5541	10	2454	0.181751	0.513665	not_significant	0.463609	0.740523	2.8654	2.604	3.127	0.134	21.463	0	-0.0514	-0.058	-0.045	0.003	-15.809	0	TRUE
Diplopia and disorders of binocular vision	sense organs	0.6317	-0.242	1.505	0.446	1.418	1.88081	0.785056	4.50415	23	5528	10	2454	0.156331	0.479809	not_significant	0.274344	0.805956	2.8666	2.605	3.128	0.133	21.475	0	-0.0514	-0.058	-0.045	0.003	-15.824	0	TRUE
Disease of capillaries	circulatory system	0.4071	-1.881	2.695	1.168	0.349	1.50245	0.152438	14.8055	10	5541	10	2454	0.727354	0.900249	not_significant	0.176801	0.138254	2.8612	2.6	3.123	0.133	21.452	0	-0.0513	-0.058	-0.045	0.003	-15.787	0	TRUE
Diseases and other conditions of the tongue	digestive	0.6916	-0.417	1.8	0.566	1.223	1.99691	0.659021	6.04965	16	5535	10	2454	0.221477	0.57062	not_significant	0.300358	0.65467	2.862	2.601	3.123	0.133	21.455	0	-0.0513	-0.058	-0.045	0.003	-15.799	0	TRUE
Diseases of esophagus	digestive	0.8013	-0.503	2.105	0.665	1.204	2.22844	0.604714	8.2071	12	5539	10	2454	0.228425	0.577318	not_significant	0.348	0.641257	2.8639	2.602	3.125	0.133	21.465	0	-0.0513	-0.058	-0.045	0.003	-15.808	0	TRUE
Diseases of hair and hair follicles	dermatologic	0.3418	-0.033	0.716	0.191	1.789	1.40748	0.967539	2.04623	117	5434	38	2426	0.0736735	0.370823	not_significant	0.148442	1.13269	2.8571	2.596	3.119	0.133	21.412	0	-0.0513	-0.058	-0.045	0.003	-15.794	0	TRUE
Diseases of lips	digestive	-0.0513	-0.728	0.626	0.345	-0.148	0.949994	0.482874	1.87012	27	5524	13	2451	0.882	0.948397	not_significant	-0.0222793	0.0545312	2.8612	2.6	3.123	0.133	21.453	0	-0.0512	-0.058	-0.045	0.003	-15.784	0	TRUE
Diseases of nail, NOS	dermatologic	0.3379	-0.122	0.798	0.234	1.441	1.402	0.885148	2.22109	73	5478	26	2438	0.149527	0.471792	not_significant	0.146748	0.82528	2.8634	2.602	3.125	0.133	21.461	0	-0.0514	-0.058	-0.045	0.003	-15.819	0	TRUE
Diseases of pancreas	digestive	0.9063	-0.197	2.009	0.563	1.611	2.47515	0.821191	7.45586	19	5532	10	2454	0.107277	0.42469	not_significant	0.393601	0.969492	2.8641	2.603	3.126	0.133	21.459	0	-0.0514	-0.058	-0.045	0.003	-15.811	0	TRUE
Diseases of the jaws	digestive	0.6253	-0.654	1.905	0.653	0.958	1.86881	0.519962	6.71941	12	5539	10	2454	0.3381	0.685934	not_significant	0.271564	0.470955	2.8608	2.599	3.122	0.133	21.448	0	-0.0513	-0.058	-0.045	0.003	-15.789	0	TRUE
Diseases of the larynx and vocal cords	respiratory	0.8373	-0.084	1.759	0.47	1.781	2.31012	0.919431	5.80663	24	5527	10	2454	0.0749711	0.372738	not_significant	0.363635	1.12511	2.868	2.606	3.13	0.133	21.486	0	-0.0515	-0.058	-0.045	0.003	-15.84	0	TRUE
Diseases of the oral soft tissues, excluding lesions specific for gingiva and tongue	digestive	0.5438	-0.168	1.255	0.363	1.498	1.72254	0.845354	3.50784	38	5513	10	2454	0.134164	0.450132	not_significant	0.236169	0.872363	2.8593	2.598	3.121	0.133	21.429	0	-0.0513	-0.058	-0.045	0.003	-15.786	0	TRUE
Dislocation	injuries & poisonings	-0.2138	-0.71	0.282	0.253	-0.844	0.80751	0.491644	1.32578	45	5506	26	2438	0.398496	0.717068	not_significant	-0.0928522	0.399576	2.8614	2.6	3.123	0.133	21.456	0	-0.0512	-0.058	-0.045	0.003	-15.773	0	TRUE
Disorder of skin and subcutaneous tissue NOS	dermatologic	0.0767	-0.185	0.339	0.134	0.574	1.07972	0.831104	1.40354	190	5361	89	2375	0.566154	0.820393	not_significant	0.0333104	0.247066	2.8632	2.602	3.125	0.133	21.456	0	-0.0514	-0.058	-0.045	0.003	-15.787	0	TRUE
Disorders involving the immune mechanism	endocrine/metabolic	0.9312	-0.308	2.171	0.632	1.472	2.53755	0.734915	8.76705	18	5533	10	2454	0.140888	0.459626	not_significant	0.404415	0.851125	2.8583	2.597	3.12	0.133	21.421	0	-0.0512	-0.058	-0.045	0.003	-15.772	0	TRUE
Disorders of acoustic nerve	sense organs	0.7332	-0.551	2.017	0.655	1.119	2.08173	0.576373	7.51574	13	5538	10	2454	0.263046	0.61895	not_significant	0.318425	0.579969	2.861	2.6	3.122	0.133	21.451	0	-0.0513	-0.058	-0.045	0.003	-15.794	0	TRUE
Disorders of bilirubin excretion	endocrine/metabolic	0.3953	-0.37	1.161	0.391	1.012	1.48483	0.690734	3.19312	29	5522	10	2454	0.311652	0.664988	not_significant	0.171677	0.50633	2.8605	2.599	3.122	0.133	21.442	0	-0.0513	-0.058	-0.045	0.003	-15.789	0	TRUE
Disorders of coccyx		0.6905	-1.525	2.906	1.131	0.611	1.99471	0.217621	18.2835	10	5541	10	2454	0.541324	0.804753	not_significant	0.29988	0.266543	2.8613	2.6	3.123	0.133	21.453	0	-0.0513	-0.058	-0.045	0.003	-15.789	0	TRUE
Disorders of conjunctiva	sense organs	0.1703	-0.396	0.736	0.289	0.59	1.18566	0.673007	2.08757	42	5509	18	2446	0.555255	0.816801	not_significant	0.0739604	0.255508	2.8622	2.601	3.124	0.133	21.456	0	-0.0513	-0.058	-0.045	0.003	-15.794	0	TRUE
Disorders of diaphragm	respiratory	0.5527	-0.601	1.706	0.588	0.939	1.73794	0.548263	5.50689	13	5538	10	2454	0.347583	0.695125	not_significant	0.240035	0.458941	2.8629	2.601	3.124	0.133	21.459	0	-0.0513	-0.058	-0.045	0.003	-15.8	0	TRUE
Disorders of esophageal motility	digestive	-0.7708	-2.048	0.507	0.652	-1.183	0.462643	0.128993	1.6603	10	5541	10	2454	0.236962	0.591508	not_significant	-0.334754	0.625321	2.8613	2.6	3.123	0.133	21.453	0	-0.0512	-0.058	-0.045	0.003	-15.778	0	TRUE
Disorders of external ear	sense organs	-0.4202	-1.281	0.441	0.439	-0.956	0.656915	0.277759	1.55426	13	5538	10	2454	0.338902	0.686244	not_significant	-0.182491	0.469926	2.862	2.601	3.123	0.133	21.457	0	-0.0512	-0.058	-0.045	0.003	-15.782	0	TRUE
Disorders of iron metabolism	hematopoietic	0.8475	-0.438	2.133	0.656	1.292	2.33381	0.645326	8.44015	13	5538	10	2454	0.196354	0.526893	not_significant	0.368065	0.706959	2.8639	2.602	3.126	0.133	21.459	0	-0.0514	-0.058	-0.045	0.003	-15.805	0	TRUE
Disorders of magnesium metabolism	endocrine/metabolic	0.738	-0.367	1.843	0.564	1.309	2.09175	0.69281	6.31546	18	5533	10	2454	0.190404	0.522112	not_significant	0.320509	0.720323	2.861	2.599	3.123	0.133	21.441	0	-0.0513	-0.058	-0.045	0.003	-15.789	0	TRUE
Disorders of muscle, ligament, and fascia	musculoskeletal	-0.1734	-1.731	1.384	0.795	-0.218	0.840801	0.177107	3.99083	10	5541	10	2454	0.827257	0.930983	not_significant	-0.0753067	0.0823597	2.8605	2.599	3.122	0.133	21.442	0	-0.0512	-0.058	-0.045	0.003	-15.773	0	TRUE
Disorders of optic nerve and visual pathways	sense organs	0.5951	-0.704	1.894	0.663	0.898	1.81321	0.494603	6.6459	11	5540	10	2454	0.369153	0.702655	not_significant	0.258449	0.432794	2.8616	2.6	3.123	0.133	21.452	0	-0.0513	-0.058	-0.045	0.003	-15.793	0	TRUE
Disorders of penis	genitourinary	0.095	-0.447	0.637	0.277	0.343	1.09966	0.639544	1.8908	46	5505	19	2445	0.73133	0.902142	not_significant	0.041258	0.135887	2.8605	2.599	3.122	0.133	21.446	0	-0.0513	-0.058	-0.045	0.003	-15.787	0	TRUE
Disorders of phosphorus metabolism	endocrine/metabolic	1.8102	-0.217	3.838	1.035	1.75	6.11167	0.80493	46.4325	16	5535	10	2454	0.0801521	0.383352	not_significant	0.78616	1.09608	2.8545	2.593	3.116	0.133	21.395	0	-0.0511	-0.058	-0.045	0.003	-15.747	0	TRUE
Disorders of refraction and accommodation; blindness and low vision	sense organs	0.8742	-0.256	2.005	0.577	1.515	2.39696	0.774142	7.42609	15	5536	10	2454	0.129671	0.447603	not_significant	0.37966	0.887158	2.8686	2.607	3.13	0.134	21.485	0	-0.0515	-0.058	-0.045	0.003	-15.834	0	TRUE
Disorders of sacrum	musculoskeletal	-0.0294	-1.439	1.38	0.719	-0.041	0.971028	0.237165	3.9749	10	5541	10	2454	0.967373	0.982774	not_significant	-0.0127683	0.0144059	2.8611	2.6	3.123	0.133	21.452	0	-0.0512	-0.058	-0.045	0.003	-15.784	0	TRUE
Disorders of the autonomic nervous system	neurological	-0.371	-1.892	1.15	0.776	-0.478	0.690044	0.15077	3.15819	10	5541	10	2454	0.6326	0.845333	not_significant	-0.161123	0.19887	2.8607	2.599	3.122	0.133	21.449	0	-0.0512	-0.058	-0.045	0.003	-15.779	0	TRUE
Disorders of the orbit	sense organs	1.3791	-0.716	3.474	1.069	1.29	3.97133	0.488703	32.2655	10	5541	10	2454	0.197023	0.527223	not_significant	0.598936	0.705484	2.8617	2.6	3.123	0.133	21.452	0	-0.0513	-0.058	-0.045	0.003	-15.795	0	TRUE
Disorders of the pituitary gland and its hypothalamic control	endocrine/metabolic	0.0233	-1.346	1.392	0.699	0.033	1.02357	0.260279	4.02289	10	5541	10	2454	0.973436	0.985557	not_significant	0.0101191	0.0116928	2.8611	2.6	3.122	0.133	21.451	0	-0.0512	-0.058	-0.045	0.003	-15.785	0	TRUE
Disorders of vitreous body	sense organs	0.6893	0.243	1.135	0.228	3.029	1.99232	1.27507	3.11117	88	5463	27	2437	0.00245124	0.0425005	mi_significant	0.299359	2.61061	2.8911	2.629	3.154	0.134	21.578	0	-0.0522	-0.059	-0.046	0.003	-15.981	0	TRUE
Displacement of intervertebral disc	musculoskeletal	0.1192	-0.253	0.491	0.19	0.628	1.1266	0.776468	1.63395	98	5453	42	2422	0.530051	0.804753	not_significant	0.0517679	0.275682	2.8613	2.6	3.123	0.133	21.453	0	-0.0513	-0.058	-0.045	0.003	-15.796	0	TRUE
Disturbance of salivary secretion	digestive	0.1855	-0.989	1.36	0.599	0.31	1.20382	0.371948	3.89619	10	5541	10	2454	0.756927	0.914093	not_significant	0.0805616	0.120946	2.8611	2.6	3.123	0.133	21.452	0	-0.0513	-0.058	-0.045	0.003	-15.787	0	TRUE
Disturbance of skin sensation	dermatologic	0.5588	0.28	0.837	0.142	3.93	1.74857	1.32313	2.30943	235	5316	69	2395	8.49233e-05	0.00390278	mi_significant	0.242684	4.07097	2.8756	2.613	3.138	0.134	21.499	0	-0.0521	-0.058	-0.046	0.003	-15.969	0	TRUE
Disturbances of sensation of smell and taste	neurological	0.4142	-0.522	1.351	0.478	0.867	1.51316	0.593333	3.86128	19	5532	10	2454	0.386047	0.712169	not_significant	0.179885	0.413359	2.8611	2.6	3.122	0.133	21.45	0	-0.0513	-0.058	-0.045	0.003	-15.792	0	TRUE
Diverticulitis	digestive	0.1122	-0.707	0.932	0.418	0.268	1.11874	0.493121	2.53958	18	5533	10	2454	0.788411	0.916968	not_significant	0.0487278	0.103247	2.862	2.6	3.123	0.133	21.451	0	-0.0513	-0.058	-0.045	0.003	-15.784	0	TRUE
Diverticulosis	digestive	0.0806	-0.246	0.407	0.167	0.484	1.08394	0.781922	1.5023	110	5441	60	2404	0.628429	0.84382	not_significant	0.0350041	0.201744	2.8662	2.604	3.128	0.134	21.421	0	-0.0514	-0.058	-0.045	0.003	-15.742	0	TRUE
Dizziness and giddiness (Light-headedness and vertigo)	sense organs	0.2079	-0.074	0.49	0.144	1.443	1.23109	0.928672	1.63232	183	5368	73	2391	0.148958	0.471404	not_significant	0.0902898	0.826935	2.8631	2.602	3.125	0.133	21.459	0	-0.0515	-0.058	-0.045	0.003	-15.829	0	TRUE
Drusen (degenerative) of retina	sense organs	0.8721	-0.444	2.188	0.671	1.299	2.39193	0.641465	8.91736	10	5541	10	2454	0.194003	0.524048	not_significant	0.378748	0.712193	2.8687	2.607	3.13	0.134	21.481	0	-0.0515	-0.058	-0.045	0.003	-15.828	0	TRUE
Dry eyes	sense organs	1.7284	0.939	2.518	0.403	4.29	5.63164	2.55742	12.4038	72	5479	10	2454	1.79072e-05	0.001456	mi_significant	0.750635	4.74697	2.8799	2.618	3.142	0.134	21.523	0	-0.052	-0.058	-0.046	0.003	-15.956	0	TRUE
Duodenal ulcer	digestive	0.5105	-1.099	2.12	0.821	0.622	1.66612	0.333204	8.33114	10	5541	10	2454	0.534092	0.804753	not_significant	0.221707	0.272384	2.8612	2.6	3.123	0.133	21.45	0	-0.0513	-0.058	-0.045	0.003	-15.788	0	TRUE
Duodenitis	digestive	0.2132	-0.762	1.189	0.498	0.428	1.23763	0.466732	3.2838	14	5537	10	2454	0.668366	0.863771	not_significant	0.0925916	0.174986	2.8618	2.6	3.123	0.133	21.455	0	-0.0513	-0.058	-0.045	0.003	-15.791	0	TRUE
Dyshidrosis	dermatologic	-0.0464	-1.016	0.923	0.494	-0.094	0.95466	0.36204	2.51683	14	5537	10	2454	0.925238	0.968294	not_significant	-0.0201513	0.0337466	2.8614	2.6	3.123	0.133	21.449	0	-0.0512	-0.058	-0.045	0.003	-15.785	0	TRUE
Dysmetabolic syndrome X	endocrine/metabolic	1.2517	0.2	2.303	0.537	2.332	3.49628	1.2214	10.0041	29	5522	10	2454	0.0196787	0.166403	not_significant	0.543606	1.706	2.8613	2.6	3.123	0.133	21.445	0	-0.0514	-0.058	-0.045	0.003	-15.808	0	TRUE
Dyspepsia and other specified disorders of function of stomach	digestive	1.0024	0.114	1.891	0.453	2.211	2.72481	1.12075	6.62599	32	5519	10	2454	0.0270373	0.191801	not_significant	0.435337	1.56804	2.8648	2.603	3.126	0.133	21.461	0	-0.0514	-0.058	-0.045	0.003	-15.826	0	TRUE
Dysphagia	digestive	0.2186	-0.183	0.62	0.205	1.066	1.24433	0.832768	1.85893	85	5466	37	2427	0.286544	0.642855	not_significant	0.0949368	0.542809	2.8666	2.605	3.128	0.133	21.473	0	-0.0515	-0.058	-0.045	0.003	-15.819	0	TRUE
Dysplasia of prostate	genitourinary	-0.4271	-3.282	2.428	1.457	-0.293	0.652398	0.0375531	11.3362	10	5541	10	2454	0.76935	0.914093	not_significant	-0.185487	0.113876	2.8606	2.599	3.122	0.133	21.446	0	-0.0512	-0.058	-0.045	0.003	-15.778	0	TRUE
Dysthymic disorder	mental disorders	0.4565	-0.574	1.487	0.526	0.869	1.57854	0.563268	4.4238	15	5536	10	2454	0.385096	0.712169	not_significant	0.198255	0.414431	2.8626	2.601	3.124	0.133	21.458	0	-0.0513	-0.058	-0.045	0.003	-15.799	0	TRUE
Dysuria	genitourinary	0.5392	0.149	0.929	0.199	2.712	1.71463	1.16067	2.53198	119	5432	35	2429	0.00669421	0.0833308	not_significant	0.234172	2.1743	2.867	2.605	3.129	0.134	21.473	0	-0.0516	-0.058	-0.045	0.003	-15.872	0	TRUE
E. coli	infectious diseases	0.7085	-0.874	2.291	0.807	0.878	2.03094	0.417279	9.88482	10	5541	10	2454	0.380193	0.708754	not_significant	0.307698	0.419996	2.862	2.601	3.123	0.133	21.453	0	-0.0513	-0.058	-0.045	0.003	-15.792	0	TRUE
Edema	symptoms	1.0776	0.567	1.588	0.26	4.14	2.93762	1.76297	4.89395	94	5457	19	2445	3.47526e-05	0.00193334	mi_significant	0.467996	4.45901	2.8957	2.633	3.158	0.134	21.611	0	-0.0524	-0.059	-0.046	0.003	-16.049	0	TRUE
Effects of heat, cold and air pressure		-0.029	-1.099	1.041	0.546	-0.053	0.971416	0.333204	2.83205	11	5540	10	2454	0.957693	0.982774	not_significant	-0.0125945	0.0187735	2.8612	2.6	3.123	0.133	21.452	0	-0.0512	-0.058	-0.045	0.003	-15.785	0	TRUE
Effects of other external causes		0.1596	-0.649	0.968	0.413	0.387	1.17304	0.522568	2.63267	20	5531	10	2454	0.69884	0.879982	not_significant	0.0693134	0.155622	2.862	2.6	3.123	0.133	21.454	0	-0.0513	-0.058	-0.045	0.003	-15.789	0	TRUE
Elevated C-reactive protein (CRP)	symptoms	0.1143	-1.051	1.279	0.594	0.192	1.12109	0.349588	3.59304	11	5540	10	2454	0.847545	0.93417	not_significant	0.0496399	0.0718371	2.8607	2.599	3.122	0.133	21.446	0	-0.0512	-0.058	-0.045	0.003	-15.783	0	TRUE
Elevated prostate specific antigen [PSA]	genitourinary	0.9124	0.345	1.48	0.29	3.151	2.49029	1.41199	4.39295	49	5502	17	2447	0.00162651	0.0323606	mi_significant	0.39625	2.78874	2.9211	2.656	3.186	0.135	21.637	0	-0.0529	-0.059	-0.046	0.003	-16.061	0	TRUE
Elevated sedimentation rate	symptoms	0.1984	-1.609	2.006	0.922	0.215	1.21945	0.200088	7.43352	10	5541	10	2454	0.829662	0.930983	not_significant	0.086164	0.0810989	2.8615	2.6	3.123	0.133	21.454	0	-0.0513	-0.058	-0.045	0.003	-15.788	0	TRUE
Elevated white blood cell count	hematopoietic	1.0488	0.366	1.731	0.348	3.012	2.85422	1.44196	5.6463	57	5494	10	2454	0.00259727	0.0425005	mi_significant	0.455488	2.58548	2.8652	2.603	3.127	0.134	21.456	0	-0.0515	-0.058	-0.045	0.003	-15.845	0	TRUE
Emphysema	respiratory	0.0441	-2.455	2.543	1.275	0.035	1.04509	0.0858632	12.7178	10	5541	10	2454	0.97239	0.985557	not_significant	0.0191524	0.0121595	2.8611	2.6	3.123	0.133	21.452	0	-0.0512	-0.058	-0.045	0.003	-15.785	0	TRUE
Empyema and pneumothorax	respiratory	0.6121	-0.699	1.923	0.669	0.915	1.8443	0.497082	6.84145	11	5540	10	2454	0.360015	0.700803	not_significant	0.265832	0.443679	2.8618	2.6	3.123	0.133	21.454	0	-0.0513	-0.058	-0.045	0.003	-15.795	0	TRUE
Encephalitis	neurological	0.6165	-1.902	3.135	1.285	0.48	1.85243	0.14927	22.9886	10	5541	10	2454	0.631356	0.844739	not_significant	0.267743	0.199725	2.8633	2.602	3.125	0.133	21.454	0	-0.0513	-0.058	-0.045	0.003	-15.791	0	TRUE
Encephalopathy, not elsewhere classified	neurological	1.6879	-0.386	3.762	1.058	1.595	5.40811	0.679771	43.0344	10	5541	10	2454	0.110613	0.431432	not_significant	0.733046	0.956193	2.8641	2.603	3.126	0.133	21.461	0	-0.0514	-0.058	-0.045	0.003	-15.809	0	TRUE
End stage renal disease	genitourinary	0.936	-0.763	2.635	0.867	1.08	2.54976	0.466266	13.9433	10	5541	10	2454	0.280352	0.638647	not_significant	0.4065	0.552296	2.8677	2.606	3.129	0.134	21.478	0	-0.0514	-0.058	-0.045	0.003	-15.821	0	TRUE
Endocarditis	circulatory system	-0.149	-1.606	1.308	0.743	-0.2	0.861569	0.200689	3.69877	10	5541	10	2454	0.841143	0.930983	not_significant	-0.0647099	0.07513	2.8609	2.6	3.122	0.133	21.45	0	-0.0512	-0.058	-0.045	0.003	-15.782	0	TRUE
Enthesopathy	musculoskeletal	0.0402	-0.238	0.318	0.142	0.283	1.04102	0.788203	1.37438	165	5386	79	2385	0.776808	0.915369	not_significant	0.0174586	0.109686	2.8618	2.6	3.123	0.133	21.453	0	-0.0513	-0.058	-0.045	0.003	-15.779	0	TRUE
Eosinophilia	hematopoietic	0.806	-1.41	3.022	1.131	0.713	2.23893	0.244143	20.5323	10	5541	10	2454	0.475987	0.76415	not_significant	0.350041	0.322405	2.8621	2.601	3.124	0.133	21.456	0	-0.0513	-0.058	-0.045	0.003	-15.793	0	TRUE
Eosinophilic esophagitis	digestive	0.0092	-1.064	1.083	0.548	0.017	1.00924	0.345073	2.95353	11	5540	10	2454	0.986591	0.99392	not_significant	0.00399551	0.00586269	2.8611	2.6	3.123	0.133	21.452	0	-0.0512	-0.058	-0.045	0.003	-15.785	0	TRUE
Epilepsy	neurological	0.5603	-0.719	1.839	0.653	0.859	1.7512	0.487239	6.29024	12	5539	10	2454	0.39059	0.71428	not_significant	0.243335	0.408279	2.86	2.599	3.121	0.133	21.442	0	-0.0512	-0.058	-0.045	0.003	-15.783	0	TRUE
Epilepsy, recurrent seizures, convulsions	neurological	0.9108	-0.344	2.166	0.64	1.423	2.48631	0.708929	8.72332	15	5536	10	2454	0.154831	0.478528	not_significant	0.395555	0.810141	2.862	2.601	3.123	0.133	21.454	0	-0.0513	-0.058	-0.045	0.003	-15.8	0	TRUE
Epistaxis or throat hemorrhage	respiratory	0.5449	-0.023	1.112	0.29	1.882	1.72444	0.977262	3.04043	56	5495	16	2448	0.0598744	0.326223	not_significant	0.236647	1.22276	2.8631	2.602	3.125	0.133	21.453	0	-0.0514	-0.058	-0.045	0.003	-15.819	0	TRUE
Erectile dysfunction [ED]	genitourinary	0.1838	-0.094	0.461	0.142	1.298	1.20178	0.910283	1.58566	177	5374	78	2386	0.194349	0.524048	not_significant	0.0798233	0.711418	2.869	2.607	3.131	0.134	21.478	0	-0.0516	-0.058	-0.045	0.003	-15.83	0	TRUE
Esophageal bleeding (varices/hemorrhage)	digestive	0.9167	-0.703	2.536	0.826	1.11	2.50102	0.495098	12.6291	10	5541	10	2454	0.267182	0.622811	not_significant	0.398118	0.573193	2.8664	2.605	3.128	0.133	21.473	0	-0.0514	-0.058	-0.045	0.003	-15.816	0	TRUE
Esophagitis, GERD and related diseases	digestive	0.1865	-1.004	1.377	0.607	0.307	1.20502	0.366411	3.96299	10	5541	10	2454	0.7587	0.914093	not_significant	0.0809959	0.11993	2.8612	2.6	3.123	0.133	21.452	0	-0.0513	-0.058	-0.045	0.003	-15.787	0	TRUE
Essential hypertension	circulatory system	0.4769	0.266	0.688	0.108	4.434	1.61107	1.30474	1.98973	380	5171	130	2334	9.24909e-06	0.000888754	mi_significant	0.207115	5.0339	2.9042	2.641	3.167	0.134	21.647	0	-0.053	-0.059	-0.047	0.003	-16.16	0	TRUE
Essential tremor	neurological	0.3269	-0.666	1.32	0.507	0.645	1.38666	0.51376	3.74342	13	5538	10	2454	0.5188	0.797283	not_significant	0.141971	0.285	2.8643	2.603	3.126	0.133	21.459	0	-0.0513	-0.058	-0.045	0.003	-15.797	0	TRUE
Eustachian tube disorders	sense organs	-0.1764	-0.6	0.247	0.216	-0.816	0.838283	0.548812	1.28018	63	5488	35	2429	0.414255	0.724823	not_significant	-0.0766095	0.382732	2.8619	2.6	3.123	0.133	21.456	0	-0.0512	-0.058	-0.045	0.003	-15.772	0	TRUE
Extrapyramidal disease and abnormal movement disorders	neurological	-0.1893	-1.214	0.836	0.523	-0.362	0.827538	0.297007	2.30712	10	5541	10	2454	0.717432	0.895215	not_significant	-0.0822119	0.144219	2.8609	2.6	3.122	0.133	21.45	0	-0.0512	-0.058	-0.045	0.003	-15.78	0	TRUE
Eye infection, viral	sense organs	0.1503	-0.631	0.932	0.399	0.377	1.16218	0.532059	2.53958	24	5527	10	2454	0.706071	0.88531	not_significant	0.0652745	0.151152	2.8604	2.599	3.122	0.133	21.444	0	-0.0512	-0.058	-0.045	0.003	-15.784	0	TRUE
Facial nerve disorders [CN7]	neurological	-0.2723	-1.297	0.752	0.523	-0.521	0.761626	0.273351	2.12124	10	5541	10	2454	0.602338	0.830271	not_significant	-0.118258	0.22016	2.8615	2.6	3.123	0.133	21.454	0	-0.0512	-0.058	-0.045	0.003	-15.784	0	TRUE
Facial weakness	symptoms	-0.1266	-1.055	0.802	0.474	-0.267	0.881086	0.348192	2.23	13	5538	10	2454	0.789382	0.916968	not_significant	-0.0549817	0.102713	2.8612	2.6	3.123	0.133	21.452	0	-0.0512	-0.058	-0.045	0.003	-15.783	0	TRUE
Fasciitis	musculoskeletal	0.4494	-0.012	0.911	0.236	1.907	1.56737	0.988072	2.48681	78	5473	25	2439	0.0565127	0.317328	not_significant	0.195172	1.24785	2.8645	2.603	3.126	0.133	21.464	0	-0.0515	-0.058	-0.045	0.003	-15.834	0	TRUE
Femoral hernia	digestive	-0.9653	-3.741	1.811	1.416	-0.682	0.380869	0.0237304	6.11656	10	5541	10	2454	0.495516	0.772508	not_significant	-0.419224	0.304942	2.862	2.601	3.123	0.133	21.456	0	-0.0513	-0.058	-0.045	0.003	-15.789	0	TRUE
Fever of unknown origin	symptoms	0.5432	0.242	0.845	0.154	3.533	1.72151	1.27379	2.32798	208	5343	58	2406	0.00041135	0.0124228	mi_significant	0.235909	3.38579	2.8589	2.597	3.121	0.134	21.41	0	-0.0516	-0.058	-0.045	0.003	-15.864	0	TRUE
First degree AV block	circulatory system	0.106	-0.886	1.098	0.506	0.209	1.11182	0.412302	2.99816	11	5540	10	2454	0.834063	0.930983	not_significant	0.0460352	0.0788011	2.8625	2.601	3.124	0.134	21.435	0	-0.0513	-0.058	-0.045	0.003	-15.769	0	TRUE
Flat foot	musculoskeletal	0.2527	-0.522	1.028	0.395	0.639	1.2875	0.593333	2.79547	25	5526	10	2454	0.52261	0.797283	not_significant	0.109746	0.281823	2.8607	2.599	3.122	0.133	21.447	0	-0.0513	-0.058	-0.045	0.003	-15.788	0	TRUE
Flatulence	digestive	1.0543	0.578	1.531	0.243	4.337	2.86997	1.78247	4.6228	117	5434	21	2443	1.44675e-05	0.00127435	mi_significant	0.457877	4.83961	2.8729	2.611	3.135	0.134	21.486	0	-0.0519	-0.058	-0.046	0.003	-15.934	0	TRUE
Fluid overload	endocrine/metabolic	1.2899	0.037	2.543	0.639	2.017	3.63242	1.03769	12.7178	18	5533	10	2454	0.043673	0.265301	not_significant	0.560196	1.35979	2.8703	2.608	3.132	0.134	21.486	0	-0.0515	-0.058	-0.045	0.003	-15.845	0	TRUE
Foreign body injury		-0.1274	-0.736	0.481	0.311	-0.41	0.880381	0.479026	1.61769	29	5522	18	2446	0.681757	0.869261	not_significant	-0.0553291	0.16637	2.8596	2.598	3.121	0.133	21.433	0	-0.0512	-0.058	-0.045	0.003	-15.754	0	TRUE
Fracture of ankle and foot	injuries & poisonings	0.0025	-0.517	0.522	0.265	0.009	1.0025	0.596307	1.6854	46	5505	22	2442	0.992484	0.995845	not_significant	0.00108574	0.00327627	2.8611	2.6	3.123	0.133	21.452	0	-0.0512	-0.058	-0.045	0.003	-15.783	0	TRUE
Fracture of clavicle or scapula	injuries & poisonings	-0.0733	-0.849	0.703	0.396	-0.185	0.929322	0.427843	2.0198	19	5532	10	2454	0.853121	0.936395	not_significant	-0.0318338	0.0689894	2.861	2.6	3.122	0.133	21.451	0	-0.0512	-0.058	-0.045	0.003	-15.781	0	TRUE
Fracture of foot	injuries & poisonings	-0.9041	-2.891	1.083	1.014	-0.892	0.404906	0.0555207	2.95353	10	5541	10	2454	0.372463	0.702655	not_significant	-0.392646	0.428917	2.8623	2.601	3.124	0.133	21.458	0	-0.0513	-0.058	-0.045	0.003	-15.789	0	TRUE
Fracture of hand or wrist	injuries & poisonings	0.3384	-0.261	0.938	0.306	1.107	1.4027	0.770281	2.55487	44	5507	15	2449	0.268351	0.623399	not_significant	0.146965	0.571298	2.861	2.6	3.122	0.133	21.45	0	-0.0513	-0.058	-0.045	0.003	-15.799	0	TRUE
Fracture of humerus	injuries & poisonings	0.6874	-0.583	1.958	0.648	1.061	1.98854	0.558221	7.08514	13	5538	10	2454	0.288866	0.642855	not_significant	0.298534	0.539303	2.8606	2.599	3.122	0.133	21.444	0	-0.0513	-0.058	-0.045	0.003	-15.787	0	TRUE
Fracture of lower limb	injuries & poisonings	0.7054	-0.429	1.84	0.579	1.219	2.02466	0.65116	6.29654	16	5535	10	2454	0.222958	0.57062	not_significant	0.306351	0.651778	2.8621	2.601	3.124	0.133	21.458	0	-0.0513	-0.058	-0.045	0.003	-15.802	0	TRUE
Fracture of patella	injuries & poisonings	-0.2525	-2.062	1.557	0.923	-0.273	0.776856	0.127199	4.74457	10	5541	10	2454	0.784486	0.916968	not_significant	-0.109659	0.105415	2.8609	2.6	3.122	0.133	21.45	0	-0.0512	-0.058	-0.045	0.003	-15.782	0	TRUE
Fracture of radius and ulna	injuries & poisonings	0.1803	-0.755	1.115	0.477	0.378	1.19758	0.470011	3.04957	18	5533	10	2454	0.705367	0.88531	not_significant	0.0783033	0.151585	2.8599	2.598	3.121	0.133	21.437	0	-0.0512	-0.058	-0.045	0.003	-15.778	0	TRUE
Fracture of ribs	injuries & poisonings	0.1917	-0.612	0.995	0.41	0.468	1.21131	0.542265	2.70472	22	5529	10	2454	0.639953	0.847069	not_significant	0.0832543	0.193852	2.8615	2.6	3.123	0.133	21.454	0	-0.0513	-0.058	-0.045	0.003	-15.791	0	TRUE
Fracture of tibia and fibula	injuries & poisonings	-0.1457	-1.06	0.769	0.466	-0.312	0.864417	0.346456	2.15761	13	5538	10	2454	0.754749	0.914093	not_significant	-0.0632767	0.122197	2.8606	2.599	3.122	0.133	21.445	0	-0.0512	-0.058	-0.045	0.003	-15.774	0	TRUE
Fracture of unspecified part of femur	injuries & poisonings	1.5928	-0.47	3.656	1.053	1.513	4.9175	0.625002	38.7062	11	5540	10	2454	0.130211	0.447603	not_significant	0.691744	0.885353	2.8602	2.599	3.122	0.133	21.436	0	-0.0513	-0.058	-0.045	0.003	-15.783	0	TRUE
Fracture of upper limb	injuries & poisonings	-1.1293	-2.739	0.48	0.821	-1.375	0.323259	0.0646349	1.61607	10	5541	10	2454	0.169003	0.498983	not_significant	-0.490449	0.772106	2.8662	2.605	3.128	0.133	21.476	0	-0.0513	-0.058	-0.045	0.003	-15.809	0	TRUE
Fracture of vertebral column without mention of spinal cord injury	injuries & poisonings	0.5577	-0.323	1.439	0.449	1.241	1.74665	0.723974	4.21648	23	5528	10	2454	0.214669	0.560261	not_significant	0.242206	0.66823	2.8636	2.602	3.125	0.133	21.467	0	-0.0514	-0.058	-0.045	0.003	-15.813	0	TRUE
Frequency of urination and polyuria	genitourinary	0.4573	0.152	0.762	0.156	2.937	1.5798	1.16416	2.14256	167	5384	62	2402	0.00331626	0.0486846	mi_significant	0.198603	2.47935	2.8944	2.631	3.157	0.134	21.58	0	-0.0524	-0.059	-0.046	0.003	-15.993	0	TRUE
Functional digestive disorders	digestive	1.1498	-0.329	2.628	0.754	1.524	3.15756	0.719643	13.8461	16	5535	10	2454	0.127453	0.444612	not_significant	0.499352	0.894651	2.8563	2.595	3.118	0.133	21.411	0	-0.0512	-0.058	-0.045	0.003	-15.76	0	TRUE
Functional disorders of bladder	genitourinary	1.3055	0.236	2.375	0.545	2.393	3.68953	1.26617	10.751	27	5524	10	2454	0.0166924	0.146056	not_significant	0.566971	1.77748	2.8688	2.607	3.131	0.134	21.475	0	-0.0515	-0.058	-0.045	0.003	-15.843	0	TRUE
Ganglion and cyst of synovium, tendon, and bursa	musculoskeletal	0.5802	-0.043	1.204	0.318	1.824	1.7864	0.957911	3.33342	47	5504	13	2451	0.0682166	0.354331	not_significant	0.251978	1.16611	2.8628	2.601	3.124	0.133	21.455	0	-0.0514	-0.058	-0.045	0.003	-15.816	0	TRUE
Gastric ulcer	digestive	-0.2233	-1.356	0.91	0.578	-0.386	0.799875	0.257689	2.48432	10	5541	10	2454	0.699323	0.879982	not_significant	-0.096978	0.155322	2.8609	2.599	3.122	0.133	21.45	0	-0.0512	-0.058	-0.045	0.003	-15.78	0	TRUE
Gastritis and duodenitis, NOS	digestive	0.4983	-0.099	1.096	0.305	1.636	1.64592	0.905743	2.99217	49	5502	15	2449	0.101918	0.418707	not_significant	0.216409	0.991748	2.8636	2.602	3.125	0.133	21.463	0	-0.0514	-0.058	-0.045	0.003	-15.821	0	TRUE
Gastrointestinal complications	digestive	0.5995	-0.412	1.611	0.516	1.162	1.82121	0.662324	5.00782	18	5533	10	2454	0.245185	0.599841	not_significant	0.26036	0.610507	2.8622	2.601	3.124	0.133	21.457	0	-0.0513	-0.058	-0.045	0.003	-15.802	0	TRUE
Gastrointestinal malfunction arising from mental factors		1.0042	-1.157	3.165	1.103	0.911	2.72972	0.314428	23.6887	10	5541	10	2454	0.362469	0.701703	not_significant	0.436119	0.440729	2.8623	2.601	3.124	0.133	21.458	0	-0.0513	-0.058	-0.045	0.003	-15.796	0	TRUE
Gastroparesis	digestive	1.0576	-1.055	3.171	1.078	0.981	2.87945	0.348192	23.8313	10	5541	10	2454	0.326584	0.67716	not_significant	0.45931	0.486005	2.8596	2.598	3.121	0.133	21.438	0	-0.0512	-0.058	-0.045	0.003	-15.778	0	TRUE
Generalized anxiety disorder	mental disorders	0.0621	-0.243	0.367	0.156	0.399	1.06407	0.784272	1.4434	150	5401	62	2402	0.690044	0.87561	not_significant	0.0269697	0.161123	2.8594	2.598	3.121	0.133	21.427	0	-0.0512	-0.058	-0.045	0.003	-15.783	0	TRUE
Generalized convulsive epilepsy	neurological	0.672	-1.483	2.827	1.099	0.611	1.95815	0.226956	16.8947	10	5541	10	2454	0.541031	0.804753	not_significant	0.291846	0.266778	2.8599	2.599	3.121	0.133	21.442	0	-0.0512	-0.058	-0.045	0.003	-15.779	0	TRUE
Genetic Test		-0.0173	-0.741	0.706	0.369	-0.047	0.982849	0.476637	2.02587	25	5526	11	2453	0.962558	0.982774	not_significant	-0.00751329	0.0165731	2.8612	2.6	3.123	0.133	21.45	0	-0.0512	-0.058	-0.045	0.003	-15.785	0	TRUE
Genital prolapse	genitourinary	1.1746	-0.967	3.317	1.093	1.075	3.23685	0.380222	27.5775	10	5541	10	2454	0.28249	0.642134	not_significant	0.510122	0.548996	2.8626	2.601	3.124	0.133	21.457	0	-0.0513	-0.058	-0.045	0.003	-15.797	0	TRUE
Genu valgum or varum (acquired)	musculoskeletal	-0.5969	-1.363	0.169	0.391	-1.528	0.550516	0.255892	1.18412	14	5537	14	2450	0.126625	0.444612	not_significant	-0.25923	0.89748	2.8563	2.595	3.118	0.133	21.41	0	-0.0511	-0.057	-0.045	0.003	-15.72	0	TRUE
GERD	digestive	0.3033	0.072	0.534	0.118	2.571	1.35432	1.07466	1.70574	297	5254	107	2357	0.0101282	0.10351	not_significant	0.131722	1.99447	2.8626	2.601	3.124	0.133	21.445	0	-0.0516	-0.058	-0.045	0.003	-15.875	0	TRUE
Giant cell arteritis	circulatory system	-0.7114	-2.715	1.292	1.022	-0.696	0.490956	0.066205	3.64006	10	5541	10	2454	0.486435	0.767898	not_significant	-0.308957	0.312975	2.8609	2.6	3.122	0.133	21.45	0	-0.0512	-0.058	-0.045	0.003	-15.781	0	TRUE
Gingival and periodontal diseases	digestive	-0.143	-1.604	1.318	0.745	-0.192	0.866754	0.201091	3.73594	10	5541	10	2454	0.847852	0.93417	not_significant	-0.0621041	0.0716802	2.8609	2.6	3.122	0.133	21.45	0	-0.0512	-0.058	-0.045	0.003	-15.781	0	TRUE
Glaucoma	sense organs	0.9419	0.403	1.481	0.275	3.427	2.56485	1.49631	4.39734	77	5474	17	2447	0.000609394	0.0165161	mi_significant	0.409062	3.2151	2.8821	2.62	3.144	0.134	21.544	0	-0.052	-0.058	-0.046	0.003	-15.952	0	TRUE
Glossodynia	digestive	0.6332	-0.949	2.216	0.807	0.784	1.88363	0.387128	9.17058	10	5541	10	2454	0.432899	0.741128	not_significant	0.274995	0.363613	2.8621	2.601	3.124	0.133	21.457	0	-0.0513	-0.058	-0.045	0.003	-15.795	0	TRUE
Glucocorticoid deficiency	endocrine/metabolic	1.8642	-0.217	3.945	1.062	1.756	6.45077	0.80493	51.6763	10	5541	10	2454	0.0790938	0.382676	not_significant	0.809612	1.10186	2.8691	2.607	3.131	0.134	21.483	0	-0.0515	-0.058	-0.045	0.003	-15.835	0	TRUE
Glycosuria or Acetonuria	endocrine/metabolic	0.2296	-2.059	2.518	1.168	0.197	1.2581	0.127581	12.4038	10	5541	10	2454	0.844106	0.932891	not_significant	0.099714	0.0736031	2.8609	2.6	3.122	0.133	21.45	0	-0.0512	-0.058	-0.045	0.003	-15.785	0	TRUE
Gout	endocrine/metabolic	0.0805	-0.4	0.561	0.245	0.328	1.08383	0.67032	1.75242	54	5497	26	2438	0.74287	0.907974	not_significant	0.0349607	0.129087	2.862	2.601	3.124	0.133	21.454	0	-0.0513	-0.058	-0.045	0.003	-15.785	0	TRUE
Gouty arthropathy	endocrine/metabolic	0.5371	-0.092	1.167	0.321	1.673	1.71104	0.912105	3.21234	41	5510	14	2450	0.0943726	0.407894	not_significant	0.23326	1.02515	2.8702	2.609	3.132	0.134	21.497	0	-0.0516	-0.058	-0.045	0.003	-15.853	0	TRUE
Graft-versus-host disease	infectious diseases	0.3718	-1.258	2.002	0.832	0.447	1.45034	0.284222	7.40385	10	5541	10	2454	0.654876	0.855162	not_significant	0.161471	0.183841	2.8607	2.599	3.122	0.133	21.445	0	-0.0512	-0.058	-0.045	0.003	-15.782	0	TRUE
Gram positive septicemia	infectious diseases	-0.1018	-1.809	1.606	0.871	-0.117	0.90321	0.163818	4.98284	10	5541	10	2454	0.907002	0.96135	not_significant	-0.0442112	0.0423916	2.8612	2.6	3.123	0.133	21.452	0	-0.0512	-0.058	-0.045	0.003	-15.785	0	TRUE
Graves' disease	endocrine/metabolic	1.7586	-0.33	3.847	1.066	1.65	5.80431	0.718924	46.8523	10	5541	10	2454	0.0988687	0.416947	not_significant	0.76375	1.00494	2.8682	2.606	3.13	0.134	21.481	0	-0.0515	-0.058	-0.045	0.003	-15.831	0	TRUE
Gross hematuria	genitourinary	0.6674	-0.025	1.36	0.353	1.889	1.94916	0.97531	3.89619	37	5514	11	2453	0.0589081	0.324301	not_significant	0.289848	1.22983	2.8712	2.609	3.133	0.134	21.491	0	-0.0516	-0.058	-0.045	0.003	-15.853	0	TRUE
H. pylori	infectious diseases	2.4802	0.479	4.481	1.021	2.43	11.9437	1.61446	88.323	27	5524	10	2454	0.0151155	0.138511	not_significant	1.07714	1.82058	2.8562	2.595	3.118	0.133	21.403	0	-0.0512	-0.058	-0.045	0.003	-15.772	0	TRUE
Hallucinations	mental disorders	0.7714	-0.935	2.478	0.871	0.886	2.16279	0.392586	11.9174	10	5541	10	2454	0.375591	0.702655	not_significant	0.335015	0.425285	2.8653	2.604	3.127	0.133	21.465	0	-0.0514	-0.058	-0.045	0.003	-15.806	0	TRUE
Hallux rigidus	musculoskeletal	0.085	-1.152	1.322	0.631	0.135	1.08872	0.316004	3.75092	10	5541	10	2454	0.892841	0.955196	not_significant	0.036915	0.0492257	2.8614	2.6	3.123	0.133	21.451	0	-0.0513	-0.058	-0.045	0.003	-15.784	0	TRUE
Hallux valgus (Bunion)	musculoskeletal	0.7496	-0.157	1.656	0.463	1.62	2.11615	0.854704	5.23832	23	5528	10	2454	0.105153	0.424173	not_significant	0.325547	0.97818	2.8658	2.604	3.127	0.133	21.476	0	-0.0514	-0.058	-0.045	0.003	-15.827	0	TRUE
Hammer toe (acquired)	musculoskeletal	-0.0878	-1.122	0.946	0.528	-0.166	0.915944	0.325628	2.57539	10	5541	10	2454	0.867804	0.943692	not_significant	-0.0381311	0.0615783	2.8608	2.599	3.122	0.133	21.447	0	-0.0512	-0.058	-0.045	0.003	-15.776	0	TRUE
Hearing loss	sense organs	0.1716	-0.166	0.51	0.173	0.995	1.1872	0.847046	1.66529	121	5430	52	2412	0.319783	0.673199	not_significant	0.0745249	0.495144	2.8644	2.603	3.126	0.133	21.465	0	-0.0514	-0.058	-0.045	0.003	-15.812	0	TRUE
Heart failure NOS	circulatory system	-0.8289	-2.169	0.512	0.684	-1.212	0.436529	0.114292	1.66863	10	5541	10	2454	0.225553	0.5731	not_significant	-0.359987	0.646751	2.8593	2.598	3.121	0.133	21.435	0	-0.0512	-0.058	-0.045	0.003	-15.759	0	TRUE
Heart failure with preserved EF [Diastolic heart failure]	circulatory system	-0.2481	-1.715	1.219	0.748	-0.332	0.780282	0.179964	3.3838	10	5541	10	2454	0.740252	0.906659	not_significant	-0.107748	0.13062	2.8593	2.598	3.121	0.133	21.42	0	-0.0512	-0.058	-0.045	0.003	-15.751	0	TRUE
Heart failure with reduced EF [Systolic or combined heart failure]	circulatory system	0.37	-0.489	1.229	0.438	0.844	1.44773	0.613239	3.41781	19	5532	10	2454	0.398568	0.717068	not_significant	0.160689	0.399498	2.8655	2.604	3.127	0.134	21.462	0	-0.0514	-0.058	-0.045	0.003	-15.804	0	TRUE
Heart transplant/surgery	circulatory system	-0.9347	-2.605	0.736	0.852	-1.097	0.392704	0.0739031	2.08757	10	5541	10	2454	0.272847	0.629694	not_significant	-0.405935	0.56408	2.8627	2.601	3.124	0.133	21.461	0	-0.0513	-0.058	-0.045	0.003	-15.791	0	TRUE
Heart valve replaced	circulatory system	0.1901	-1.064	1.444	0.64	0.297	1.20937	0.345073	4.23761	10	5541	10	2454	0.766392	0.914093	not_significant	0.0825594	0.115549	2.8621	2.601	3.124	0.133	21.452	0	-0.0513	-0.058	-0.045	0.003	-15.786	0	TRUE
Heartburn	digestive	0.7983	0.098	1.499	0.357	2.234	2.22176	1.10296	4.47721	45	5506	10	2454	0.0255119	0.189902	not_significant	0.346697	1.59326	2.8634	2.602	3.125	0.133	21.449	0	-0.0514	-0.058	-0.045	0.003	-15.819	0	TRUE
Hemangioma and lymphangioma, any site	neoplasms	0.3848	-0.308	1.078	0.354	1.088	1.46932	0.734915	2.9388	33	5518	11	2453	0.276592	0.634183	not_significant	0.167117	0.55816	2.8617	2.6	3.123	0.133	21.454	0	-0.0513	-0.058	-0.045	0.003	-15.8	0	TRUE
Hemangioma of skin and subcutaneous tissue	neoplasms	-0.2659	-0.66	0.128	0.201	-1.322	0.766516	0.516851	1.13655	65	5486	43	2421	0.186254	0.518274	not_significant	-0.115479	0.729894	2.8578	2.596	3.119	0.133	21.426	0	-0.0511	-0.057	-0.045	0.003	-15.719	0	TRUE
Hematemesis	digestive	0.6324	-1.702	2.967	1.191	0.531	1.88212	0.182319	19.4335	10	5541	10	2454	0.595455	0.830271	not_significant	0.274648	0.225151	2.8624	2.601	3.124	0.133	21.455	0	-0.0513	-0.058	-0.045	0.003	-15.791	0	TRUE
Hematuria	genitourinary	0.672	0.253	1.091	0.214	3.141	1.95815	1.28788	2.97725	105	5446	30	2434	0.00168385	0.0323606	mi_significant	0.291846	2.7737	2.8824	2.62	3.145	0.134	21.541	0	-0.052	-0.058	-0.046	0.003	-15.95	0	TRUE
Hemiplegia	neurological	0.1136	-1.38	1.607	0.762	0.149	1.1203	0.251579	4.98783	10	5541	10	2454	0.881497	0.948397	not_significant	0.0493359	0.0547794	2.8617	2.6	3.123	0.133	21.447	0	-0.0513	-0.058	-0.045	0.003	-15.781	0	TRUE
Hemoglobinuria	hematopoietic	-0.8884	-3.666	1.89	1.417	-0.627	0.411313	0.0255786	6.61937	10	5541	10	2454	0.530792	0.804753	not_significant	-0.385827	0.275076	2.8617	2.6	3.123	0.133	21.455	0	-0.0513	-0.058	-0.045	0.003	-15.787	0	TRUE
Hemoptysis	respiratory	1.1383	0.172	2.105	0.493	2.309	3.12146	1.18768	8.2071	30	5521	10	2454	0.0209508	0.171285	not_significant	0.494357	1.6788	2.8654	2.604	3.127	0.133	21.466	0	-0.0515	-0.058	-0.045	0.003	-15.831	0	TRUE
Hemorrhage from gastrointestinal ulcer	digestive	0.3976	-1.873	2.668	1.158	0.343	1.48825	0.153662	14.4111	10	5541	10	2454	0.731433	0.902142	not_significant	0.172675	0.135825	2.8612	2.6	3.123	0.133	21.452	0	-0.0513	-0.058	-0.045	0.003	-15.787	0	TRUE
Hemorrhage NOS	circulatory system	0.7309	-0.44	1.902	0.597	1.224	2.07695	0.644036	6.69928	12	5539	10	2454	0.221063	0.57062	not_significant	0.317426	0.655484	2.8679	2.606	3.13	0.134	21.482	0	-0.0515	-0.058	-0.045	0.003	-15.827	0	TRUE
Hemorrhage of gastrointestinal tract	digestive	1.0816	-0.039	2.202	0.572	1.892	2.94939	0.961751	9.04308	19	5532	10	2454	0.0584617	0.323529	not_significant	0.469733	1.23313	2.8698	2.608	3.131	0.133	21.497	0	-0.0515	-0.058	-0.045	0.003	-15.852	0	TRUE
Hemorrhage of rectum and anus	digestive	0.3199	-0.046	0.685	0.186	1.715	1.37699	0.955042	1.98377	120	5431	40	2424	0.0862866	0.394826	not_significant	0.138931	1.06406	2.8574	2.596	3.119	0.133	21.416	0	-0.0513	-0.058	-0.045	0.003	-15.796	0	TRUE
Hemorrhage or hematoma complicating a procedure	injuries & poisonings	1.7436	-0.342	3.829	1.064	1.639	5.71789	0.710348	46.0165	11	5540	10	2454	0.101316	0.418707	not_significant	0.757236	0.994324	2.8629	2.601	3.124	0.133	21.455	0	-0.0513	-0.058	-0.045	0.003	-15.803	0	TRUE
Hemorrhoids	circulatory system	0.2355	0.007	0.464	0.117	2.019	1.26554	1.00702	1.59042	278	5273	112	2352	0.0434679	0.265301	not_significant	0.102276	1.36183	2.8689	2.607	3.131	0.134	21.489	0	-0.0517	-0.058	-0.045	0.003	-15.879	0	TRUE
Hepatomegaly	digestive	0.6242	-0.23	1.478	0.436	1.432	1.86675	0.794534	4.38417	26	5525	10	2454	0.152064	0.474133	not_significant	0.271087	0.817975	2.8627	2.601	3.124	0.133	21.457	0	-0.0513	-0.058	-0.045	0.003	-15.807	0	TRUE
Hereditary and idiopathic peripheral neuropathy	neurological	2.0978	0.602	3.593	0.763	2.749	8.14822	1.82577	36.3429	17	5534	10	2454	0.00597487	0.0779684	not_significant	0.911063	2.22367	2.8978	2.635	3.161	0.134	21.608	0	-0.0523	-0.059	-0.046	0.003	-15.996	0	TRUE
Hereditary hemochromatosis	hematopoietic	-0.2066	-1.42	1.007	0.619	-0.334	0.813345	0.241714	2.73738	10	5541	10	2454	0.738732	0.905847	not_significant	-0.0897252	0.131513	2.8618	2.6	3.123	0.133	21.454	0	-0.0513	-0.058	-0.045	0.003	-15.787	0	TRUE
Hereditary retinal dystrophies	sense organs	-0.0933	-2.541	2.354	1.249	-0.075	0.91092	0.0787876	10.5276	10	5541	10	2454	0.940428	0.976456	not_significant	-0.0405197	0.0266743	2.8611	2.6	3.123	0.133	21.452	0	-0.0512	-0.058	-0.045	0.003	-15.785	0	TRUE
Herpes simplex	infectious diseases	0.1815	-0.318	0.681	0.255	0.713	1.19901	0.727603	1.97585	55	5496	23	2441	0.476135	0.76415	not_significant	0.0788244	0.32227	2.8624	2.601	3.124	0.133	21.456	0	-0.0513	-0.058	-0.045	0.003	-15.797	0	TRUE
Herpes zoster	infectious diseases	0.2291	-0.237	0.696	0.238	0.963	1.25747	0.788991	2.00571	66	5485	26	2438	0.335562	0.684066	not_significant	0.0994969	0.474227	2.8623	2.601	3.124	0.133	21.458	0	-0.0513	-0.058	-0.045	0.003	-15.805	0	TRUE
Herpes zoster with nervous system complications	infectious diseases	1.6771	-0.432	3.786	1.076	1.559	5.35002	0.649209	44.0797	10	5541	10	2454	0.119091	0.438984	not_significant	0.728355	0.92412	2.8656	2.604	3.127	0.133	21.47	0	-0.0514	-0.058	-0.045	0.003	-15.817	0	TRUE
Hirsutism	dermatologic	1.1762	-0.992	3.344	1.106	1.063	3.24203	0.370834	28.3322	10	5541	10	2454	0.287583	0.642855	not_significant	0.510817	0.541237	2.8629	2.601	3.124	0.133	21.454	0	-0.0513	-0.058	-0.045	0.003	-15.796	0	TRUE
Hodgkin's disease	neoplasms	1.1491	-1.012	3.31	1.103	1.042	3.15535	0.363491	27.3851	10	5541	10	2454	0.29738	0.657502	not_significant	0.499048	0.526688	2.8626	2.601	3.124	0.133	21.453	0	-0.0513	-0.058	-0.045	0.003	-15.794	0	TRUE
Hydrocele	genitourinary	0.0095	-0.66	0.679	0.342	0.028	1.00955	0.516851	1.9719	29	5522	13	2451	0.977836	0.989064	not_significant	0.0041258	0.00973415	2.8611	2.6	3.122	0.133	21.451	0	-0.0512	-0.058	-0.045	0.003	-15.785	0	TRUE
Hydrocephalus	neurological	0.5384	-1.8	2.877	1.193	0.451	1.71326	0.165299	17.7609	10	5541	10	2454	0.65184	0.854833	not_significant	0.233824	0.185859	2.8618	2.6	3.123	0.133	21.454	0	-0.0513	-0.058	-0.045	0.003	-15.79	0	TRUE
Hydronephrosis	genitourinary	1.0093	-0.074	2.092	0.552	1.827	2.74368	0.928672	8.1011	23	5528	10	2454	0.067716	0.354331	not_significant	0.438333	1.16931	2.8607	2.599	3.122	0.133	21.446	0	-0.0513	-0.058	-0.045	0.003	-15.799	0	TRUE
Hyperaldosteronism	endocrine/metabolic	0.8189	-1.44	3.078	1.153	0.711	2.268	0.236928	21.7149	10	5541	10	2454	0.477367	0.76415	not_significant	0.355644	0.321147	2.8626	2.601	3.124	0.133	21.454	0	-0.0513	-0.058	-0.045	0.003	-15.792	0	TRUE
Hypercalcemia	endocrine/metabolic	-0.4039	-1.082	0.274	0.346	-1.168	0.667711	0.338917	1.31521	21	5530	15	2449	0.242893	0.599841	not_significant	-0.175412	0.614584	2.8609	2.6	3.122	0.133	21.452	0	-0.0512	-0.058	-0.045	0.003	-15.769	0	TRUE
Hypercholesterolemia	endocrine/metabolic	0.2589	-0.017	0.535	0.141	1.84	1.2955	0.983144	1.70745	194	5357	76	2388	0.0657019	0.347235	not_significant	0.112439	1.18242	2.8668	2.605	3.128	0.133	21.482	0	-0.0516	-0.058	-0.045	0.003	-15.861	0	TRUE
Hyperestrogenism	endocrine/metabolic	-0.7858	-3.679	2.108	1.476	-0.532	0.455755	0.0252482	8.23176	10	5541	10	2454	0.594503	0.830271	not_significant	-0.341269	0.225846	2.8611	2.6	3.123	0.133	21.453	0	-0.0512	-0.058	-0.045	0.003	-15.784	0	TRUE
Hyperglyceridemia	endocrine/metabolic	0.6765	0.18	1.173	0.254	2.668	1.96698	1.19722	3.23167	85	5466	20	2444	0.00762443	0.0866561	not_significant	0.2938	2.11779	2.8573	2.596	3.119	0.133	21.409	0	-0.0513	-0.058	-0.045	0.003	-15.802	0	TRUE
Hyperhidrosis	dermatologic	0.4325	-0.086	0.951	0.265	1.634	1.54111	0.917594	2.5883	62	5489	20	2444	0.102228	0.418707	not_significant	0.187832	0.99043	2.8633	2.602	3.125	0.133	21.459	0	-0.0514	-0.058	-0.045	0.003	-15.82	0	TRUE
Hyperlipidemia	endocrine/metabolic	0.4175	0.247	0.588	0.087	4.806	1.51816	1.28018	1.80038	603	4948	202	2262	1.54147e-06	0.000203666	mi_significant	0.181318	5.81207	2.8717	2.61	3.134	0.134	21.479	0	-0.0525	-0.059	-0.046	0.003	-16.074	0	TRUE
Hypermetropia	sense organs	0.0236	-0.908	0.955	0.475	0.05	1.02388	0.40333	2.59867	14	5537	10	2454	0.960387	0.982774	not_significant	0.0102493	0.0175538	2.8612	2.6	3.123	0.133	21.451	0	-0.0512	-0.058	-0.045	0.003	-15.783	0	TRUE
Hyperosmolality and/or hypernatremia	endocrine/metabolic	0.628	-0.685	1.941	0.67	0.937	1.87386	0.50409	6.96571	10	5541	10	2454	0.348549	0.695125	not_significant	0.272737	0.457736	2.8633	2.602	3.125	0.133	21.461	0	-0.0513	-0.058	-0.045	0.003	-15.801	0	TRUE
Hyperparathyroidism	endocrine/metabolic	0.1007	-1.303	1.505	0.716	0.141	1.10594	0.271715	4.50415	10	5541	10	2454	0.888221	0.95218	not_significant	0.0437335	0.0514791	2.8613	2.6	3.123	0.133	21.452	0	-0.0513	-0.058	-0.045	0.003	-15.785	0	TRUE
Hyperplasia of prostate	genitourinary	0.7959	0.423	1.169	0.19	4.184	2.21643	1.52653	3.21877	117	5434	41	2423	2.86509e-05	0.00181946	mi_significant	0.345655	4.54286	2.9569	2.691	3.223	0.136	21.773	0	-0.054	-0.061	-0.048	0.003	-16.256	0	TRUE
Hyperpotassemia	endocrine/metabolic	0.718	0.024	1.412	0.354	2.029	2.05033	1.02429	4.10416	37	5514	11	2453	0.0424763	0.261032	not_significant	0.311823	1.37185	2.8745	2.613	3.136	0.134	21.506	0	-0.0517	-0.058	-0.045	0.003	-15.871	0	TRUE
Hypersomnia	neurological	0.0714	-0.269	0.412	0.174	0.411	1.07401	0.764143	1.50983	116	5435	50	2414	0.681134	0.869261	not_significant	0.0310086	0.166767	2.8604	2.599	3.122	0.133	21.445	0	-0.0513	-0.058	-0.045	0.003	-15.789	0	TRUE
Hypertensive chronic kidney disease	circulatory system	1.4921	0.655	2.329	0.427	3.492	4.44642	1.92514	10.2677	38	5513	10	2454	0.000479239	0.0136907	mi_significant	0.648011	3.31945	2.9123	2.649	3.176	0.135	21.649	0	-0.0527	-0.059	-0.046	0.003	-16.069	0	TRUE
Hypertensive heart and/or renal disease	circulatory system	0.1348	-1.019	1.288	0.588	0.229	1.14431	0.360956	3.62553	10	5541	10	2454	0.81886	0.928887	not_significant	0.0585429	0.0867901	2.862	2.6	3.123	0.133	21.45	0	-0.0513	-0.058	-0.045	0.003	-15.784	0	TRUE
Hypertensive heart disease	circulatory system	0.9407	-0.116	1.998	0.539	1.745	2.56177	0.890475	7.37429	15	5536	10	2454	0.0810414	0.385859	not_significant	0.408541	1.09129	2.8793	2.617	3.142	0.134	21.506	0	-0.0518	-0.058	-0.045	0.003	-15.869	0	TRUE
Hypertrophy of breast (Gynecomastia)	genitourinary	0.6783	-0.33	1.687	0.514	1.319	1.97052	0.718924	5.40325	20	5531	10	2454	0.187304	0.518274	not_significant	0.294582	0.727453	2.8623	2.601	3.124	0.133	21.452	0	-0.0513	-0.058	-0.045	0.003	-15.8	0	TRUE
Hypocalcemia	endocrine/metabolic	1.4513	0.225	2.678	0.626	2.319	4.26866	1.25232	14.556	24	5527	10	2454	0.0204142	0.169904	not_significant	0.630292	1.69007	2.8666	2.605	3.128	0.134	21.465	0	-0.0515	-0.058	-0.045	0.003	-15.831	0	TRUE
Hypoglycemia	endocrine/metabolic	0.4999	-0.847	1.847	0.687	0.728	1.64856	0.428699	6.34077	10	5541	10	2454	0.466889	0.756904	not_significant	0.217104	0.330787	2.8626	2.601	3.124	0.133	21.457	0	-0.0513	-0.058	-0.045	0.003	-15.795	0	TRUE
Hypopotassemia	endocrine/metabolic	0.4961	-0.188	1.18	0.349	1.421	1.6423	0.828615	3.25437	39	5512	11	2453	0.155333	0.478679	not_significant	0.215453	0.808737	2.8601	2.599	3.122	0.133	21.437	0	-0.0513	-0.058	-0.045	0.003	-15.793	0	TRUE
Hyposmolality and/or hyponatremia	endocrine/metabolic	0.7805	0.129	1.433	0.333	2.346	2.18256	1.13769	4.19125	47	5504	12	2452	0.0189601	0.162267	not_significant	0.338967	1.72216	2.872	2.61	3.134	0.134	21.495	0	-0.0516	-0.058	-0.045	0.003	-15.868	0	TRUE
Hypotension NOS	circulatory system	0.7666	0.047	1.486	0.367	2.088	2.15244	1.04812	4.41938	37	5514	10	2454	0.0367755	0.241353	not_significant	0.33293	1.43444	2.8712	2.61	3.133	0.134	21.507	0	-0.0516	-0.058	-0.045	0.003	-15.869	0	TRUE
Hypothermia/Chills	symptoms	0.4767	-0.441	1.394	0.468	1.018	1.61075	0.643393	4.03094	21	5530	10	2454	0.308489	0.664976	not_significant	0.207028	0.510761	2.8603	2.599	3.122	0.133	21.444	0	-0.0513	-0.058	-0.045	0.003	-15.789	0	TRUE
Hypothyroidism NOS	endocrine/metabolic	1.1918	0.665	1.718	0.269	4.436	3.293	1.94449	5.57337	102	5449	17	2447	9.18019e-06	0.000888754	mi_significant	0.517592	5.03715	2.8863	2.624	3.149	0.134	21.537	0	-0.0522	-0.059	-0.046	0.003	-15.989	0	TRUE
Hypovolemia	endocrine/metabolic	1.1826	0.492	1.873	0.352	3.357	3.26285	1.63558	6.50779	59	5492	10	2454	0.000786642	0.0187559	mi_significant	0.513597	3.10422	2.8759	2.614	3.138	0.134	21.514	0	-0.0518	-0.058	-0.045	0.003	-15.914	0	TRUE
Iatrogenic hypotension	circulatory system	-0.1952	-1.417	1.027	0.623	-0.313	0.82267	0.24244	2.79268	10	5541	10	2454	0.754202	0.914093	not_significant	-0.0847743	0.122512	2.8616	2.6	3.123	0.133	21.455	0	-0.0513	-0.058	-0.045	0.003	-15.787	0	TRUE
Idiopathic fibrosing alveolitis	respiratory	0.06	-2.846	2.966	1.483	0.04	1.06184	0.0580762	19.4141	10	5541	10	2454	0.967705	0.982774	not_significant	0.0260577	0.014257	2.8613	2.6	3.123	0.133	21.442	0	-0.0513	-0.058	-0.045	0.003	-15.776	0	TRUE
Immunity deficiency	endocrine/metabolic	0.1222	-0.494	0.738	0.314	0.389	1.12998	0.610181	2.09175	35	5516	16	2448	0.697242	0.879457	not_significant	0.0530708	0.156617	2.862	2.601	3.123	0.133	21.454	0	-0.0513	-0.058	-0.045	0.003	-15.789	0	TRUE
Impacted cerumen	sense organs	0.4349	0.091	0.779	0.176	2.478	1.54481	1.09527	2.17929	135	5416	47	2417	0.0132302	0.12713	not_significant	0.188875	1.87843	2.8753	2.613	3.137	0.134	21.513	0	-0.0518	-0.058	-0.045	0.003	-15.906	0	TRUE
Impaired fasting glucose	endocrine/metabolic	0.3036	0.015	0.593	0.147	2.059	1.35473	1.01511	1.80941	180	5371	68	2396	0.0394502	0.252268	not_significant	0.131852	1.40395	2.8682	2.607	3.13	0.133	21.487	0	-0.0517	-0.058	-0.045	0.003	-15.872	0	TRUE
Impetigo	dermatologic	0.4763	-0.637	1.589	0.568	0.839	1.61011	0.528877	4.89885	15	5536	10	2454	0.401612	0.717068	not_significant	0.206854	0.396193	2.8596	2.598	3.121	0.133	21.439	0	-0.0512	-0.058	-0.045	0.003	-15.781	0	TRUE
Incisional hernia	digestive	0.494	-1.086	2.074	0.806	0.613	1.63886	0.337564	7.95659	10	5541	10	2454	0.54	0.804753	not_significant	0.214541	0.267606	2.8609	2.6	3.122	0.133	21.45	0	-0.0513	-0.058	-0.045	0.003	-15.787	0	TRUE
Infectious mononucleosis	infectious diseases	-0.3083	-1.76	1.143	0.741	-0.416	0.734695	0.172045	3.13616	10	5541	10	2454	0.677214	0.869261	not_significant	-0.133893	0.169274	2.8615	2.6	3.123	0.133	21.454	0	-0.0512	-0.058	-0.045	0.003	-15.785	0	TRUE
Infective connective tissue disorders	musculoskeletal	-0.3246	-3.103	2.454	1.418	-0.229	0.722816	0.0449143	11.6348	10	5541	10	2454	0.818864	0.928887	not_significant	-0.140972	0.0867884	2.8606	2.599	3.122	0.133	21.445	0	-0.0512	-0.058	-0.045	0.003	-15.777	0	TRUE
Infestation (lice, mites)	infectious diseases	0.6123	-0.934	2.159	0.789	0.776	1.84467	0.392979	8.66247	10	5541	10	2454	0.437684	0.741841	not_significant	0.265919	0.35884	2.8598	2.598	3.121	0.133	21.439	0	-0.0512	-0.058	-0.045	0.003	-15.779	0	TRUE
Inflammation of eyelids	sense organs	0.1635	-0.206	0.533	0.188	0.868	1.17763	0.813833	1.70404	101	5450	42	2422	0.385336	0.712169	not_significant	0.0710071	0.41416	2.862	2.601	3.123	0.133	21.454	0	-0.0513	-0.058	-0.045	0.003	-15.802	0	TRUE
Inflammation of the eye	sense organs	0.4739	-1.946	2.894	1.235	0.384	1.60625	0.142844	18.0654	10	5541	10	2454	0.701131	0.881207	not_significant	0.205812	0.154201	2.8625	2.601	3.124	0.133	21.453	0	-0.0513	-0.058	-0.045	0.003	-15.789	0	TRUE
Inflammatory and toxic neuropathy	neurological	1.1722	0.554	1.79	0.315	3.718	3.22909	1.7402	5.98945	65	5486	13	2451	0.000200577	0.00757179	mi_significant	0.50908	3.69772	2.8984	2.636	3.161	0.134	21.62	0	-0.0524	-0.059	-0.046	0.003	-16.039	0	TRUE
Inflammatory conditions of jaw	digestive	-0.4597	-2.264	1.344	0.92	-0.499	0.631473	0.103934	3.83435	10	5541	10	2454	0.617496	0.835715	not_significant	-0.199645	0.209366	2.8617	2.6	3.123	0.133	21.455	0	-0.0513	-0.058	-0.045	0.003	-15.787	0	TRUE
Influenza	respiratory	1.3176	0.655	1.98	0.338	3.9	3.73445	1.92514	7.24274	87	5464	10	2454	9.62478e-05	0.00423891	mi_significant	0.572226	4.01661	2.844	2.582	3.106	0.134	21.285	0	-0.0511	-0.057	-0.045	0.003	-15.713	0	TRUE
Ingrowing nail	dermatologic	-0.06	-0.676	0.556	0.314	-0.191	0.941765	0.508648	1.74368	31	5520	16	2448	0.848637	0.93417	not_significant	-0.0260577	0.0712782	2.861	2.6	3.122	0.133	21.451	0	-0.0512	-0.058	-0.045	0.003	-15.779	0	TRUE
Inguinal hernia	digestive	0.3894	-0.081	0.86	0.24	1.622	1.47609	0.922194	2.36316	70	5481	25	2439	0.104751	0.424173	not_significant	0.169114	0.979841	2.867	2.605	3.129	0.133	21.477	0	-0.0515	-0.058	-0.045	0.003	-15.837	0	TRUE
Injuries to the nervous system	injuries & poisonings	0.812	-1.399	3.023	1.128	0.72	2.25241	0.246844	20.5529	10	5541	10	2454	0.471674	0.761159	not_significant	0.352647	0.326358	2.8621	2.601	3.124	0.133	21.457	0	-0.0513	-0.058	-0.045	0.003	-15.794	0	TRUE
Injury to blood vessels		1.2584	-0.893	3.41	1.098	1.146	3.51979	0.409426	30.2652	10	5541	10	2454	0.251655	0.605922	not_significant	0.546516	0.599194	2.8638	2.602	3.125	0.133	21.461	0	-0.0513	-0.058	-0.045	0.003	-15.803	0	TRUE
Injury, NOS		0.0635	-0.138	0.265	0.103	0.618	1.06556	0.871099	1.30343	349	5202	150	2314	0.536307	0.804753	not_significant	0.0275777	0.270586	2.8587	2.597	3.12	0.133	21.425	0	-0.0513	-0.058	-0.045	0.003	-15.793	0	TRUE
Insect bite	injuries & poisonings	0.2083	-0.527	0.944	0.375	0.555	1.23158	0.590373	2.57024	23	5528	11	2453	0.578793	0.827978	not_significant	0.0904635	0.237477	2.8637	2.602	3.125	0.133	21.455	0	-0.0513	-0.058	-0.045	0.003	-15.792	0	TRUE
Insomnia	neurological	0.4653	0.188	0.743	0.142	3.285	1.59249	1.20683	2.10223	220	5331	71	2393	0.00101915	0.0224426	mi_significant	0.202077	2.99176	2.8727	2.611	3.134	0.134	21.508	0	-0.0519	-0.058	-0.046	0.003	-15.944	0	TRUE
Internal derangement of knee	injuries & poisonings	0.1807	-0.18	0.542	0.184	0.981	1.19806	0.83527	1.71944	107	5444	44	2420	0.326448	0.67716	not_significant	0.078477	0.486186	2.8623	2.601	3.124	0.133	21.457	0	-0.0514	-0.058	-0.045	0.003	-15.807	0	TRUE
Intervertebral disc disorder with myelopathy	musculoskeletal	0.1721	-1.499	1.843	0.853	0.202	1.1878	0.223353	6.31546	10	5541	10	2454	0.840016	0.930983	not_significant	0.0747421	0.0757122	2.8611	2.6	3.123	0.133	21.452	0	-0.0512	-0.058	-0.045	0.003	-15.786	0	TRUE
Intestinal disaccharidase deficiencies and disaccharide malabsorption	endocrine/metabolic	0.46	0.201	0.719	0.132	3.485	1.58407	1.22262	2.05238	248	5303	83	2381	0.000492652	0.0137035	mi_significant	0.199775	3.30746	2.8819	2.62	3.144	0.134	21.545	0	-0.0522	-0.059	-0.046	0.003	-15.993	0	TRUE
Intestinal helminthiases	infectious diseases	-0.363	-2.347	1.621	1.012	-0.359	0.695586	0.0956557	5.05815	10	5541	10	2454	0.719899	0.895215	not_significant	-0.157649	0.142729	2.86	2.599	3.122	0.133	21.439	0	-0.0512	-0.058	-0.045	0.003	-15.77	0	TRUE
Intestinal infection	infectious diseases	0.2172	-0.24	0.675	0.233	0.931	1.24259	0.786628	1.96403	69	5482	27	2437	0.352111	0.696113	not_significant	0.0943288	0.45332	2.8618	2.6	3.123	0.133	21.453	0	-0.0513	-0.058	-0.045	0.003	-15.801	0	TRUE
Intestinal infection due to C. difficile	infectious diseases	1.1452	-0.501	2.791	0.84	1.364	3.14307	0.605924	16.2973	10	5541	10	2454	0.172642	0.501147	not_significant	0.497354	0.762853	2.8698	2.608	3.132	0.134	21.481	0	-0.0515	-0.058	-0.045	0.003	-15.83	0	TRUE
Intestinal infection due to protozoa	infectious diseases	0.0493	-1.606	1.704	0.844	0.058	1.05054	0.200689	5.49589	10	5541	10	2454	0.953425	0.982774	not_significant	0.0214107	0.0207134	2.861	2.6	3.122	0.133	21.45	0	-0.0512	-0.058	-0.045	0.003	-15.785	0	TRUE
Intestinal malabsorption (non-celiac)	digestive	0.1961	-0.738	1.13	0.476	0.412	1.21665	0.478069	3.09566	18	5533	10	2454	0.680561	0.869261	not_significant	0.0851651	0.167133	2.8599	2.598	3.121	0.133	21.438	0	-0.0512	-0.058	-0.045	0.003	-15.779	0	TRUE
Intracranial hemorrhage (injury)	injuries & poisonings	1.9112	-0.26	4.082	1.108	1.725	6.7612	0.771052	59.2639	10	5541	10	2454	0.0845053	0.390503	not_significant	0.830024	1.07312	2.8755	2.613	3.137	0.134	21.509	0	-0.0516	-0.058	-0.045	0.003	-15.865	0	TRUE
Iron deficiency anemia secondary to blood loss (chronic)	hematopoietic	2.153	0.678	3.628	0.753	2.861	8.61065	1.96993	37.6375	27	5524	10	2454	0.004224	0.0611612	not_significant	0.935036	2.37428	2.8798	2.617	3.142	0.134	21.515	0	-0.0518	-0.058	-0.045	0.003	-15.902	0	TRUE
Iron deficiency anemias, unspecified or not due to blood loss	hematopoietic	1.031	0.461	1.601	0.291	3.544	2.80387	1.58566	4.95799	75	5476	15	2449	0.000393557	0.012235	mi_significant	0.447758	3.40499	2.8811	2.619	3.143	0.134	21.538	0	-0.052	-0.058	-0.046	0.003	-15.949	0	TRUE
Irritable Bowel Syndrome	digestive	0.7572	0.111	1.404	0.33	2.295	2.1323	1.11739	4.07145	50	5501	12	2452	0.0217278	0.172679	not_significant	0.328848	1.66298	2.8656	2.604	3.127	0.133	21.468	0	-0.0515	-0.058	-0.045	0.003	-15.839	0	TRUE
Jaundice (not of newborn)	digestive	0.0808	-0.678	0.84	0.387	0.209	1.08415	0.507631	2.31637	24	5527	10	2454	0.834611	0.930983	not_significant	0.035091	0.078516	2.8609	2.599	3.122	0.133	21.449	0	-0.0512	-0.058	-0.045	0.003	-15.786	0	TRUE
Jaw disease NOS	digestive	0.8517	-1.359	3.063	1.128	0.755	2.34363	0.256918	21.3916	10	5541	10	2454	0.450233	0.751572	not_significant	0.369889	0.346563	2.8625	2.601	3.124	0.133	21.458	0	-0.0513	-0.058	-0.045	0.003	-15.795	0	TRUE
Joint effusions	musculoskeletal	0.3364	-0.045	0.718	0.195	1.728	1.3999	0.955997	2.05033	102	5449	39	2425	0.0840483	0.390503	not_significant	0.146097	1.07547	2.8697	2.608	3.131	0.134	21.489	0	-0.0516	-0.058	-0.045	0.003	-15.854	0	TRUE
Joint/ligament sprain	injuries & poisonings	-0.2513	-0.541	0.038	0.148	-1.7	0.777789	0.582166	1.03873	134	5417	76	2388	0.089087	0.399004	not_significant	-0.109138	1.05019	2.8681	2.607	3.13	0.133	21.488	0	-0.0512	-0.058	-0.045	0.003	-15.784	0	TRUE
Juvenile osteochondrosis	musculoskeletal	0.985	-1.158	3.128	1.094	0.901	2.67781	0.314114	22.8283	10	5541	10	2454	0.367742	0.702655	not_significant	0.42778	0.434456	2.8607	2.599	3.122	0.133	21.445	0	-0.0513	-0.058	-0.045	0.003	-15.784	0	TRUE
Keloid scar	dermatologic	0.5891	-0.26	1.438	0.433	1.359	1.80237	0.771052	4.21226	26	5525	10	2454	0.174021	0.502568	not_significant	0.255843	0.759399	2.8617	2.6	3.123	0.133	21.449	0	-0.0513	-0.058	-0.045	0.003	-15.799	0	TRUE
Keratitis	sense organs	0.8437	-0.779	2.467	0.828	1.019	2.32495	0.458865	11.787	10	5541	10	2454	0.30828	0.664976	not_significant	0.366414	0.511055	2.8632	2.602	3.125	0.133	21.466	0	-0.0513	-0.058	-0.045	0.003	-15.806	0	TRUE
Keratoconus	sense organs	0.975	-1.171	3.121	1.095	0.89	2.65117	0.310057	22.669	10	5541	10	2454	0.373306	0.702655	not_significant	0.423437	0.427936	2.8605	2.599	3.122	0.133	21.444	0	-0.0512	-0.058	-0.045	0.003	-15.783	0	TRUE
Keratoderma, acquired	dermatologic	0.0711	-1.009	1.151	0.551	0.129	1.07369	0.364583	3.16135	11	5540	10	2454	0.897329	0.95616	not_significant	0.0308783	0.0470484	2.8612	2.6	3.123	0.133	21.452	0	-0.0513	-0.058	-0.045	0.003	-15.785	0	TRUE
Kidney replaced by transpant	genitourinary	0.6441	-1.567	2.855	1.128	0.571	1.90427	0.20867	17.3744	10	5541	10	2454	0.568043	0.820393	not_significant	0.279729	0.245619	2.8611	2.6	3.122	0.133	21.451	0	-0.0513	-0.058	-0.045	0.003	-15.787	0	TRUE
Kyphoscoliosis and scoliosis	musculoskeletal	0.3658	-0.59	1.322	0.488	0.75	1.44167	0.554327	3.75092	18	5533	10	2454	0.453325	0.751572	not_significant	0.158865	0.34359	2.8615	2.6	3.123	0.133	21.45	0	-0.0513	-0.058	-0.045	0.003	-15.791	0	TRUE
Kyphosis (acquired)	musculoskeletal	1.1098	-1.018	3.237	1.085	1.022	3.03375	0.361317	25.4572	10	5541	10	2454	0.306593	0.664976	not_significant	0.48198	0.513438	2.8616	2.6	3.123	0.133	21.455	0	-0.0513	-0.058	-0.045	0.003	-15.794	0	TRUE
Labyrinthitis	sense organs	0.5524	-1.036	2.141	0.81	0.682	1.73742	0.354871	8.50794	10	5541	10	2454	0.495429	0.772508	not_significant	0.239904	0.305019	2.8614	2.6	3.123	0.133	21.453	0	-0.0513	-0.058	-0.045	0.003	-15.79	0	TRUE
Lack of coordination	neurological	0.7703	-0.823	2.364	0.813	0.947	2.16041	0.439112	10.6334	10	5541	10	2454	0.343489	0.691559	not_significant	0.334537	0.464087	2.8626	2.601	3.124	0.133	21.458	0	-0.0513	-0.058	-0.045	0.003	-15.798	0	TRUE
Late effect		0.1504	-1.216	1.516	0.697	0.216	1.1623	0.296413	4.55397	10	5541	10	2454	0.829107	0.930983	not_significant	0.0653179	0.0813893	2.8612	2.6	3.123	0.133	21.452	0	-0.0513	-0.058	-0.045	0.003	-15.787	0	TRUE
Late effects of cerebrovascular disease	circulatory system	0.9984	-0.588	2.585	0.809	1.234	2.71394	0.555437	13.2633	10	5541	10	2454	0.21732	0.565783	not_significant	0.4336	0.662899	2.8653	2.604	3.127	0.133	21.465	0	-0.0514	-0.058	-0.045	0.003	-15.81	0	TRUE
Laxity of ligament or hypermobility syndrome	musculoskeletal	-1.3319	-3.125	0.461	0.915	-1.456	0.263975	0.0439369	1.58566	10	5541	10	2454	0.145408	0.467623	not_significant	-0.578437	0.837411	2.8638	2.602	3.125	0.133	21.466	0	-0.0513	-0.058	-0.045	0.003	-15.795	0	TRUE
Left bundle branch block	circulatory system	-0.5142	-1.754	0.726	0.633	-0.812	0.597979	0.17308	2.0668	10	5541	10	2454	0.416517	0.725302	not_significant	-0.223314	0.380367	2.8569	2.595	3.119	0.133	21.401	0	-0.0511	-0.057	-0.045	0.003	-15.727	0	TRUE
Lipoma	neoplasms	0.2668	-0.338	0.871	0.308	0.865	1.30578	0.713195	2.3893	40	5511	15	2449	0.387071	0.712169	not_significant	0.11587	0.412209	2.8617	2.6	3.123	0.133	21.453	0	-0.0513	-0.058	-0.045	0.003	-15.797	0	TRUE
Lipoma of skin and subcutaneous tissue	neoplasms	0.623	-0.051	1.297	0.344	1.812	1.86451	0.950279	3.65831	43	5508	11	2453	0.070051	0.3577	not_significant	0.270565	1.15459	2.8611	2.6	3.123	0.133	21.441	0	-0.0513	-0.058	-0.045	0.003	-15.803	0	TRUE
Lipoprotein disorders	endocrine/metabolic	1.0686	0.32	1.817	0.382	2.799	2.9113	1.37713	6.15337	55	5496	10	2454	0.00511966	0.070279	not_significant	0.464087	2.29076	2.8499	2.588	3.111	0.133	21.357	0	-0.0511	-0.057	-0.045	0.003	-15.742	0	TRUE
Liver abscess and sequelae of chronic liver disease	digestive	1.0864	-0.505	2.678	0.812	1.338	2.96359	0.603506	14.556	10	5541	10	2454	0.180983	0.513665	not_significant	0.471818	0.742363	2.8686	2.607	3.13	0.134	21.482	0	-0.0515	-0.058	-0.045	0.003	-15.828	0	TRUE
Localized adiposity	endocrine/metabolic	-0.053	-2.078	1.972	1.033	-0.051	0.94838	0.12518	7.18503	10	5541	10	2454	0.959056	0.982774	not_significant	-0.0230176	0.0181562	2.8608	2.599	3.122	0.133	21.432	0	-0.0512	-0.058	-0.045	0.003	-15.766	0	TRUE
Localized superficial swelling, mass, or lump	dermatologic	0.588	0.155	1.021	0.221	2.663	1.80038	1.16766	2.77597	103	5448	27	2437	0.00774703	0.0871129	not_significant	0.255365	2.11086	2.859	2.597	3.121	0.133	21.419	0	-0.0514	-0.058	-0.045	0.003	-15.817	0	TRUE
Loose body in joint	musculoskeletal	-0.4934	-1.701	0.715	0.616	-0.801	0.610547	0.182501	2.04419	10	5541	10	2454	0.423393	0.72887	not_significant	-0.214281	0.373256	2.8604	2.599	3.122	0.133	21.447	0	-0.0512	-0.058	-0.045	0.003	-15.773	0	TRUE
Loss of teeth or edentulism	digestive	0.142	-2.373	2.657	1.283	0.111	1.15258	0.0932007	14.2535	10	5541	10	2454	0.91185	0.962984	not_significant	0.0616698	0.0400768	2.8613	2.6	3.123	0.133	21.452	0	-0.0513	-0.058	-0.045	0.003	-15.785	0	TRUE
Lump or mass in breast	genitourinary	0.2846	-0.912	1.481	0.61	0.466	1.32923	0.40172	4.39734	10	5541	10	2454	0.641019	0.847069	not_significant	0.1236	0.193129	2.8618	2.6	3.123	0.133	21.456	0	-0.0513	-0.058	-0.045	0.003	-15.791	0	TRUE
Lung disease due to external agents	respiratory	0.9359	-1.289	3.161	1.135	0.824	2.54951	0.275546	23.5942	10	5541	10	2454	0.40979	0.723158	not_significant	0.406456	0.387439	2.8619	2.6	3.123	0.133	21.452	0	-0.0513	-0.058	-0.045	0.003	-15.79	0	TRUE
Lung transplant	respiratory	0.5776	-1.607	2.763	1.115	0.518	1.78176	0.200488	15.8473	10	5541	10	2454	0.604369	0.830271	not_significant	0.250848	0.218698	2.8599	2.598	3.121	0.133	21.438	0	-0.0512	-0.058	-0.045	0.003	-15.776	0	TRUE
Lymphadenitis	hematopoietic	0.4909	0.035	0.947	0.233	2.11	1.63379	1.03562	2.57796	87	5464	25	2439	0.0348707	0.231813	not_significant	0.213195	1.45754	2.8596	2.598	3.121	0.133	21.427	0	-0.0514	-0.058	-0.045	0.003	-15.808	0	TRUE
Lymphoid leukemia	neoplasms	0.3793	-1.952	2.71	1.189	0.319	1.46126	0.14199	15.0293	10	5541	10	2454	0.749822	0.912039	not_significant	0.164728	0.125042	2.8613	2.6	3.123	0.133	21.451	0	-0.0513	-0.058	-0.045	0.003	-15.786	0	TRUE
Lymphoid leukemia, chronic	neoplasms	-0.3959	-1.927	1.135	0.781	-0.507	0.673074	0.145584	3.11117	10	5541	10	2454	0.612367	0.83304	not_significant	-0.171937	0.212988	2.8608	2.599	3.122	0.133	21.45	0	-0.0512	-0.058	-0.045	0.003	-15.779	0	TRUE
Macular puckering of retina	sense organs	0.962	-0.19	2.114	0.588	1.637	2.61693	0.826959	8.2813	12	5539	10	2454	0.10173	0.418707	not_significant	0.417791	0.992551	2.8773	2.615	3.14	0.134	21.501	0	-0.0517	-0.058	-0.045	0.003	-15.859	0	TRUE
Major depressive disorder	mental disorders	0.0385	-0.247	0.324	0.146	0.265	1.03925	0.781141	1.38265	161	5390	75	2389	0.791311	0.916968	not_significant	0.0167203	0.101653	2.8614	2.6	3.123	0.133	21.452	0	-0.0513	-0.058	-0.045	0.003	-15.782	0	TRUE
Malaise and fatigue	symptoms	0.3582	0.151	0.565	0.106	3.395	1.43075	1.163	1.75945	388	5163	134	2330	0.000686733	0.0168809	mi_significant	0.155564	3.16321	2.8652	2.603	3.127	0.134	21.447	0	-0.0519	-0.058	-0.046	0.003	-15.929	0	TRUE
Malignant neoplasm of rectum, rectosigmoid junction, and anus	neoplasms	1.2877	-0.825	3.401	1.078	1.195	3.62444	0.438235	29.9941	10	5541	10	2454	0.232268	0.583902	not_significant	0.559241	0.634011	2.8621	2.601	3.124	0.133	21.456	0	-0.0513	-0.058	-0.045	0.003	-15.797	0	TRUE
Malignant neoplasm of testis	neoplasms	1.302	-0.787	3.391	1.066	1.222	3.67664	0.455208	29.6956	10	5541	10	2454	0.221786	0.57062	not_significant	0.565451	0.654067	2.8604	2.599	3.122	0.133	21.446	0	-0.0513	-0.058	-0.045	0.003	-15.787	0	TRUE
Malignant neoplasm, other	neoplasms	1.8091	-0.245	3.863	1.048	1.726	6.10495	0.782705	47.608	12	5539	10	2454	0.084341	0.390503	not_significant	0.785682	1.07396	2.8632	2.602	3.125	0.133	21.453	0	-0.0513	-0.058	-0.045	0.003	-15.804	0	TRUE
Malunion and nonunion of fracture	musculoskeletal	0.8537	-0.765	2.472	0.826	1.034	2.34832	0.465334	11.8461	10	5541	10	2454	0.301294	0.65799	not_significant	0.370757	0.52101	2.864	2.602	3.126	0.133	21.462	0	-0.0513	-0.058	-0.045	0.003	-15.803	0	TRUE
Manlignant and unknown neoplasms of brain and nervous system	neoplasms	1.048	-0.523	2.619	0.802	1.307	2.85194	0.59274	13.722	10	5541	10	2454	0.191161	0.522112	not_significant	0.455141	0.7186	2.8661	2.604	3.128	0.133	21.473	0	-0.0514	-0.058	-0.045	0.003	-15.817	0	TRUE
Mastodynia	genitourinary	-0.2077	-1.181	0.766	0.497	-0.418	0.812451	0.306972	2.15114	11	5540	10	2454	0.675766	0.869261	not_significant	-0.090203	0.170204	2.8605	2.599	3.122	0.133	21.447	0	-0.0512	-0.058	-0.045	0.003	-15.774	0	TRUE
Mastoiditis & related conditions	sense organs	1.2722	-0.82	3.364	1.067	1.192	3.5687	0.440432	28.9046	10	5541	10	2454	0.233325	0.584419	not_significant	0.552509	0.632038	2.8602	2.599	3.122	0.133	21.442	0	-0.0512	-0.058	-0.045	0.003	-15.784	0	TRUE
Mechanical complication of unspecified genitourinary device, implant, and graft	injuries & poisonings	1.3533	-0.195	2.902	0.79	1.713	3.87018	0.822835	18.2105	12	5539	10	2454	0.0867756	0.395353	not_significant	0.587731	1.0616	2.8692	2.607	3.131	0.134	21.482	0	-0.0515	-0.058	-0.045	0.003	-15.835	0	TRUE
Melanomas of skin	neoplasms	-0.0281	-0.855	0.799	0.422	-0.067	0.972291	0.425283	2.22332	16	5535	10	2454	0.946868	0.978338	not_significant	-0.0122037	0.0237105	2.8609	2.599	3.122	0.133	21.447	0	-0.0512	-0.058	-0.045	0.003	-15.776	0	TRUE
Memory loss	mental disorders	0.9271	0.18	1.674	0.381	2.434	2.52717	1.19722	5.33346	39	5512	10	2454	0.0149505	0.138511	not_significant	0.402634	1.82535	2.8742	2.612	3.136	0.134	21.508	0	-0.0517	-0.058	-0.045	0.003	-15.881	0	TRUE
Meniere's disease	sense organs	-0.3116	-2.309	1.686	1.019	-0.306	0.732274	0.0993606	5.39785	10	5541	10	2454	0.759785	0.914093	not_significant	-0.135326	0.11931	2.8601	2.599	3.122	0.133	21.438	0	-0.0512	-0.058	-0.045	0.003	-15.769	0	TRUE
Meningitis	neurological	1.1053	-0.987	3.197	1.067	1.036	3.02013	0.372693	24.459	10	5541	10	2454	0.300432	0.65799	not_significant	0.480026	0.522253	2.8584	2.597	3.12	0.133	21.428	0	-0.0512	-0.058	-0.045	0.003	-15.769	0	TRUE
Methicillin resistant Staphylococcus aureus	infectious diseases	0.9883	-1.138	3.115	1.085	0.911	2.68666	0.320459	22.5334	10	5541	10	2454	0.362313	0.701703	not_significant	0.429213	0.440916	2.8604	2.599	3.122	0.133	21.447	0	-0.0512	-0.058	-0.045	0.003	-15.785	0	TRUE
Methicillin sensitive Staphylococcus aureus	infectious diseases	0.7564	-0.556	2.069	0.67	1.129	2.13059	0.573498	7.9169	12	5539	10	2454	0.258784	0.616695	not_significant	0.3285	0.587062	2.8628	2.601	3.124	0.133	21.461	0	-0.0513	-0.058	-0.045	0.003	-15.803	0	TRUE
Microscopic hematuria	genitourinary	1.0978	0.276	1.92	0.419	2.618	2.99756	1.31785	6.82096	37	5514	10	2454	0.00885569	0.0964509	not_significant	0.476768	2.05278	2.873	2.611	3.135	0.134	21.501	0	-0.0517	-0.058	-0.045	0.003	-15.876	0	TRUE
Migrain with aura	neurological	0.0378	-0.666	0.741	0.359	0.105	1.03852	0.51376	2.09803	26	5525	12	2452	0.916043	0.963609	not_significant	0.0164163	0.0380841	2.8611	2.6	3.123	0.133	21.452	0	-0.0513	-0.058	-0.045	0.003	-15.785	0	TRUE
Migraine	neurological	0.3462	-0.118	0.81	0.237	1.462	1.41369	0.888696	2.24791	73	5478	25	2439	0.143766	0.466138	not_significant	0.150353	0.842342	2.8619	2.6	3.123	0.133	21.448	0	-0.0514	-0.058	-0.045	0.003	-15.809	0	TRUE
Mild cognitive impairment	mental disorders	1.5527	-0.596	3.701	1.096	1.417	4.72421	0.551011	40.4878	10	5541	10	2454	0.156607	0.479809	not_significant	0.674329	0.805188	2.8675	2.606	3.129	0.134	21.472	0	-0.0514	-0.058	-0.045	0.003	-15.819	0	TRUE
Mineral deficiency NEC	endocrine/metabolic	0.5092	-0.349	1.367	0.438	1.163	1.66396	0.705393	3.92356	24	5527	10	2454	0.24479	0.599841	not_significant	0.221143	0.611206	2.8616	2.6	3.123	0.133	21.45	0	-0.0513	-0.058	-0.045	0.003	-15.797	0	TRUE
Mitral valve disease	circulatory system	0.718	-0.867	2.303	0.809	0.888	2.05033	0.42021	10.0041	10	5541	10	2454	0.374645	0.702655	not_significant	0.311823	0.42638	2.8632	2.602	3.125	0.133	21.462	0	-0.0513	-0.058	-0.045	0.003	-15.801	0	TRUE
Mixed hyperlipidemia	endocrine/metabolic	0.2788	-0.006	0.563	0.145	1.921	1.32154	0.994018	1.75593	186	5365	70	2394	0.0547803	0.312988	not_significant	0.121081	1.26138	2.8646	2.603	3.126	0.133	21.468	0	-0.0515	-0.058	-0.045	0.003	-15.852	0	TRUE
Mood disorders	mental disorders	-0.3028	-1.041	0.436	0.377	-0.803	0.738747	0.353101	1.54651	19	5532	12	2452	0.421707	0.72834	not_significant	-0.131504	0.374989	2.8618	2.6	3.123	0.133	21.452	0	-0.0512	-0.058	-0.045	0.003	-15.777	0	TRUE
Morbid obesity	endocrine/metabolic	0.1934	-0.3	0.687	0.252	0.768	1.21337	0.740818	1.98774	60	5491	23	2441	0.442569	0.744896	not_significant	0.0839926	0.354019	2.8603	2.599	3.122	0.133	21.446	0	-0.0513	-0.058	-0.045	0.003	-15.793	0	TRUE
Multiple myeloma	neoplasms	0.5423	-1.753	2.838	1.171	0.463	1.71996	0.173253	17.0816	10	5541	10	2454	0.64335	0.847069	not_significant	0.235518	0.191553	2.8618	2.6	3.123	0.133	21.455	0	-0.0513	-0.058	-0.045	0.003	-15.79	0	TRUE
Multiple sclerosis	neurological	0.6962	-1.517	2.909	1.129	0.617	2.00611	0.219369	18.3385	10	5541	10	2454	0.537479	0.804753	not_significant	0.302356	0.269638	2.8614	2.6	3.123	0.133	21.453	0	-0.0513	-0.058	-0.045	0.003	-15.789	0	TRUE
Muscle weakness	symptoms	0.7241	0.1	1.348	0.318	2.275	2.06287	1.10517	3.84972	50	5501	13	2451	0.0229095	0.178054	not_significant	0.314473	1.63998	2.8687	2.607	3.13	0.133	21.488	0	-0.0516	-0.058	-0.045	0.003	-15.858	0	TRUE
Muscle/tendon sprain		-0.4548	-1.671	0.761	0.62	-0.733	0.634575	0.188059	2.14042	10	5541	10	2454	0.463547	0.756125	not_significant	-0.197517	0.333907	2.8599	2.599	3.121	0.133	21.444	0	-0.0512	-0.058	-0.045	0.003	-15.77	0	TRUE
Muscular dystrophies	neurological	-0.8627	-3.65	1.924	1.422	-0.607	0.422021	0.0259911	6.8483	10	5541	10	2454	0.544003	0.806467	not_significant	-0.374666	0.264399	2.8616	2.6	3.123	0.133	21.454	0	-0.0513	-0.058	-0.045	0.003	-15.786	0	TRUE
Muscular wasting and disuse atrophy	symptoms	1.1669	-0.37	2.704	0.784	1.488	3.21202	0.690734	14.9394	11	5540	10	2454	0.136741	0.453088	not_significant	0.506778	0.864101	2.866	2.604	3.128	0.134	21.468	0	-0.0514	-0.058	-0.045	0.003	-15.816	0	TRUE
Musculoskeletal symptoms referable to limbs	symptoms	0.1875	-0.3	0.675	0.249	0.754	1.20623	0.740818	1.96403	57	5494	25	2439	0.451025	0.751572	not_significant	0.0814302	0.345799	2.8637	2.602	3.125	0.133	21.462	0	-0.0514	-0.058	-0.045	0.003	-15.802	0	TRUE
Myalgia and myositis unspecified	symptoms	0.957	0.342	1.572	0.314	3.049	2.60387	1.40776	4.81627	61	5490	13	2451	0.00229603	0.0414932	mi_significant	0.41562	2.63902	2.8756	2.614	3.137	0.134	21.517	0	-0.0518	-0.058	-0.045	0.003	-15.909	0	TRUE
Mycoses	infectious diseases	-0.5032	-1.614	0.608	0.567	-0.887	0.604593	0.19909	1.83675	10	5541	10	2454	0.374825	0.702655	not_significant	-0.218537	0.426171	2.8614	2.6	3.123	0.133	21.454	0	-0.0512	-0.058	-0.045	0.003	-15.78	0	TRUE
Myelofibrosis	hematopoietic	-0.299	-3.095	2.497	1.426	-0.21	0.741559	0.045275	12.146	10	5541	10	2454	0.833953	0.930983	not_significant	-0.129854	0.0788586	2.8606	2.599	3.122	0.133	21.445	0	-0.0512	-0.058	-0.045	0.003	-15.777	0	TRUE
Myeloid leukemia, acute	neoplasms	0.9126	-1.238	3.063	1.097	0.832	2.49079	0.289964	21.3916	10	5541	10	2454	0.405497	0.720354	not_significant	0.396337	0.392012	2.8601	2.599	3.122	0.133	21.441	0	-0.0512	-0.058	-0.045	0.003	-15.78	0	TRUE
Myeloproliferative disease	neoplasms	0.452	-0.604	1.508	0.539	0.839	1.57145	0.546621	4.51769	15	5536	10	2454	0.40143	0.717068	not_significant	0.196301	0.39639	2.8625	2.601	3.124	0.133	21.459	0	-0.0513	-0.058	-0.045	0.003	-15.799	0	TRUE
Myocardial infarction	circulatory system	0.5271	-0.133	1.188	0.337	1.564	1.69401	0.875465	3.28051	35	5516	13	2451	0.117838	0.437036	not_significant	0.228917	0.928713	2.8724	2.61	3.134	0.134	21.496	0	-0.0516	-0.058	-0.045	0.003	-15.851	0	TRUE
Myoclonus	neurological	0.0973	-1.74	1.935	0.938	0.104	1.10219	0.17552	6.92404	10	5541	10	2454	0.917319	0.963609	not_significant	0.0422569	0.0374794	2.8615	2.6	3.123	0.133	21.446	0	-0.0513	-0.058	-0.045	0.003	-15.779	0	TRUE
Myopathy	neurological	-0.0677	-1.463	1.328	0.712	-0.095	0.934541	0.231541	3.77349	10	5541	10	2454	0.924256	0.968294	not_significant	-0.0294017	0.0342078	2.8611	2.6	3.123	0.133	21.452	0	-0.0512	-0.058	-0.045	0.003	-15.785	0	TRUE
Myopia	sense organs	0.4695	0.103	0.836	0.187	2.509	1.59919	1.10849	2.30712	139	5412	38	2426	0.0121116	0.120773	not_significant	0.203901	1.9168	2.849	2.587	3.111	0.133	21.341	0	-0.0512	-0.058	-0.045	0.003	-15.755	0	TRUE
Nasal polyps	respiratory	0.132	-0.626	0.89	0.387	0.341	1.14111	0.534726	2.43513	24	5527	10	2454	0.732848	0.902489	not_significant	0.0573269	0.134986	2.8611	2.6	3.123	0.133	21.451	0	-0.0513	-0.058	-0.045	0.003	-15.788	0	TRUE
Nausea and vomiting	symptoms	0.1158	-0.153	0.385	0.137	0.844	1.12277	0.85813	1.46961	197	5354	80	2384	0.39861	0.717068	not_significant	0.0502913	0.399452	2.8586	2.597	3.12	0.133	21.425	0	-0.0513	-0.058	-0.045	0.003	-15.791	0	TRUE
Neoplasm of uncertain behavior	neoplasms	0.584	0.173	0.995	0.21	2.782	1.7932	1.18887	2.70472	104	5447	31	2433	0.00540464	0.0732398	not_significant	0.253628	2.26723	2.8742	2.612	3.136	0.134	21.508	0	-0.0518	-0.058	-0.045	0.003	-15.904	0	TRUE
Neoplasm of uncertain behavior of skin	neoplasms	0.1365	-0.121	0.394	0.132	1.038	1.14625	0.886034	1.4829	207	5344	89	2375	0.29949	0.65799	not_significant	0.0592812	0.523617	2.863	2.601	3.124	0.133	21.458	0	-0.0514	-0.058	-0.045	0.003	-15.812	0	TRUE
Neoplasm of unspecified nature of digestive system	neoplasms	1.1461	-0.419	2.711	0.799	1.435	3.1459	0.657704	15.0443	10	5541	10	2454	0.15123	0.474133	not_significant	0.497745	0.820363	2.8672	2.605	3.129	0.134	21.47	0	-0.0514	-0.058	-0.045	0.003	-15.819	0	TRUE
Nephrotic syndrome without mention of glomerulonephritis	genitourinary	0.0489	-1.32	1.418	0.699	0.07	1.05012	0.267135	4.12885	10	5541	10	2454	0.944224	0.976685	not_significant	0.021237	0.0249249	2.8611	2.6	3.122	0.133	21.451	0	-0.0512	-0.058	-0.045	0.003	-15.785	0	TRUE
Nerve plexus lesions	neurological	-0.2806	-1.333	0.772	0.537	-0.522	0.75533	0.263685	2.16409	10	5541	10	2454	0.601425	0.830271	not_significant	-0.121863	0.220818	2.8607	2.599	3.122	0.133	21.449	0	-0.0512	-0.058	-0.045	0.003	-15.776	0	TRUE
Nerve root and plexus disorders	neurological	1.0974	-1.022	3.217	1.081	1.015	2.99637	0.359874	24.9531	10	5541	10	2454	0.310155	0.664976	not_significant	0.476595	0.508422	2.8602	2.599	3.122	0.133	21.44	0	-0.0512	-0.058	-0.045	0.003	-15.781	0	TRUE
Neuralgia, neuritis, and radiculitis NOS	symptoms	0.3581	-0.105	0.821	0.236	1.515	1.43061	0.900325	2.27277	70	5481	26	2438	0.129776	0.447603	not_significant	0.155521	0.886804	2.8671	2.605	3.129	0.133	21.477	0	-0.0515	-0.058	-0.045	0.003	-15.834	0	TRUE
Neuroendocrine tumors	neoplasms	1.83	-0.275	3.935	1.074	1.704	6.23389	0.759572	51.1621	10	5541	10	2454	0.0884474	0.399004	not_significant	0.794759	1.05331	2.8697	2.608	3.131	0.134	21.489	0	-0.0515	-0.058	-0.045	0.003	-15.84	0	TRUE
Neurological disorders	mental disorders	0.2192	-0.4	0.838	0.316	0.694	1.24508	0.67032	2.31174	38	5513	15	2449	0.487967	0.767898	not_significant	0.0951974	0.311609	2.8619	2.6	3.123	0.133	21.453	0	-0.0513	-0.058	-0.045	0.003	-15.795	0	TRUE
Neutropenia	hematopoietic	0.6422	-0.155	1.439	0.407	1.58	1.90066	0.856415	4.21648	30	5521	10	2454	0.114182	0.433	not_significant	0.278904	0.942403	2.8638	2.602	3.125	0.133	21.456	0	-0.0514	-0.058	-0.045	0.003	-15.811	0	TRUE
Nevus, non-neoplastic	neoplasms	0.1462	-0.192	0.485	0.173	0.846	1.15743	0.825307	1.62418	120	5431	50	2414	0.397458	0.717068	not_significant	0.0634939	0.400709	2.8614	2.6	3.123	0.133	21.451	0	-0.0513	-0.058	-0.045	0.003	-15.8	0	TRUE
Non-Hodgkins lymphoma	neoplasms	0.3324	-0.721	1.386	0.538	0.618	1.39431	0.486266	3.99882	14	5537	10	2454	0.536355	0.804753	not_significant	0.144359	0.270548	2.8618	2.6	3.123	0.133	21.452	0	-0.0513	-0.058	-0.045	0.003	-15.791	0	TRUE
Nonallopathic lesions NEC	symptoms	0.5145	-0.472	1.501	0.503	1.022	1.6728	0.623754	4.48617	21	5530	10	2454	0.306605	0.664976	not_significant	0.223445	0.513421	2.8576	2.596	3.119	0.133	21.419	0	-0.0512	-0.058	-0.045	0.003	-15.767	0	TRUE
Noninfectious dermatoses of eyelid	sense organs	-0.1792	-1.579	1.22	0.714	-0.251	0.835939	0.206181	3.38719	10	5541	10	2454	0.801841	0.920246	not_significant	-0.0778256	0.0959116	2.8615	2.6	3.123	0.133	21.453	0	-0.0513	-0.058	-0.045	0.003	-15.786	0	TRUE
Noninfectious gastroenteritis	digestive	0.5236	0.124	0.923	0.204	2.571	1.68809	1.13202	2.51683	113	5438	33	2431	0.010154	0.10351	not_significant	0.227397	1.99336	2.8638	2.602	3.125	0.133	21.456	0	-0.0515	-0.058	-0.045	0.003	-15.851	0	TRUE
Noninflammatory female genital disorders	genitourinary	-0.5809	-3.436	2.274	1.457	-0.399	0.559395	0.0321932	9.7182	10	5541	10	2454	0.69005	0.87561	not_significant	-0.252282	0.16112	2.8607	2.599	3.122	0.133	21.449	0	-0.0512	-0.058	-0.045	0.003	-15.781	0	TRUE
Nonrheumatic aortic valve disorders	circulatory system	0.0941	-1.076	1.264	0.597	0.158	1.09867	0.340957	3.53955	10	5541	10	2454	0.874709	0.945366	not_significant	0.0408671	0.0581363	2.8619	2.6	3.123	0.133	21.443	0	-0.0513	-0.058	-0.045	0.003	-15.776	0	TRUE
Nonrheumatic mitral valve disorders	circulatory system	-0.1717	-0.746	0.403	0.293	-0.586	0.842232	0.47426	1.49631	29	5522	21	2443	0.558001	0.817266	not_significant	-0.0745684	0.253365	2.8571	2.595	3.119	0.134	21.397	0	-0.0511	-0.057	-0.045	0.003	-15.712	0	TRUE
Nonrheumatic tricuspid valve disorders	circulatory system	-0.7602	-3.541	2.02	1.419	-0.536	0.467573	0.0289843	7.53832	10	5541	10	2454	0.592031	0.830271	not_significant	-0.330151	0.227656	2.8612	2.6	3.123	0.133	21.452	0	-0.0512	-0.058	-0.045	0.003	-15.784	0	TRUE
Nonspecific abnormal findings in stool contents	digestive	0.2345	-0.243	0.712	0.244	0.962	1.26428	0.784272	2.03806	67	5484	24	2440	0.335885	0.684066	not_significant	0.101842	0.47381	2.8593	2.598	3.121	0.133	21.434	0	-0.0513	-0.058	-0.045	0.003	-15.788	0	TRUE
Nonspecific abnormal findings on radiological and other examination of biliary tract	digestive	-0.2595	-1.399	0.88	0.581	-0.446	0.771437	0.246844	2.4109	10	5541	10	2454	0.655327	0.855162	not_significant	-0.112699	0.183542	2.8611	2.6	3.123	0.133	21.451	0	-0.0512	-0.058	-0.045	0.003	-15.781	0	TRUE
Nonspecific abnormal findings on radiological and other examination of musculoskeletal system	symptoms	0.9377	0.144	1.732	0.405	2.315	2.5541	1.15488	5.65195	35	5516	10	2454	0.0206284	0.170345	not_significant	0.407238	1.68553	2.8732	2.611	3.135	0.134	21.499	0	-0.0517	-0.058	-0.045	0.003	-15.87	0	TRUE
Nonspecific abnormal findings on radiological and other examination of other intrathoracic organs (echocardiogram, etc)	symptoms	-0.07	-0.543	0.403	0.242	-0.29	0.932394	0.581003	1.49631	48	5503	29	2435	0.771992	0.914257	not_significant	-0.0304006	0.112387	2.8595	2.598	3.121	0.133	21.422	0	-0.0512	-0.058	-0.045	0.003	-15.738	0	TRUE
Nonspecific abnormal findings on radiological and other examination of skull and head	neurological	2.2935	0.278	4.309	1.028	2.23	9.90956	1.32049	74.3661	20	5531	10	2454	0.0257404	0.190263	not_significant	0.996054	1.58938	2.8627	2.601	3.124	0.133	21.45	0	-0.0514	-0.058	-0.045	0.003	-15.811	0	TRUE
Nonspecific abnormal results of function study of brain and central nervous system	neurological	1.7645	-0.361	3.89	1.084	1.627	5.83865	0.696979	48.9109	10	5541	10	2454	0.103659	0.421412	not_significant	0.766313	0.984395	2.8702	2.608	3.132	0.134	21.486	0	-0.0515	-0.058	-0.045	0.003	-15.838	0	TRUE
Nonspecific chest pain	circulatory system	0.3565	0.143	0.57	0.109	3.274	1.42832	1.15373	1.76827	367	5184	124	2340	0.00106138	0.0228955	mi_significant	0.154826	2.97413	2.8587	2.597	3.12	0.134	21.404	0	-0.0517	-0.058	-0.045	0.003	-15.884	0	TRUE
Nonspecific elevation of levels of transaminase or lactic acid dehydrogenase [LDH]	digestive	0.5343	0.025	1.043	0.26	2.058	1.70625	1.02532	2.83772	71	5480	20	2444	0.0396183	0.252268	not_significant	0.232044	1.4021	2.8615	2.6	3.123	0.133	21.444	0	-0.0514	-0.058	-0.045	0.003	-15.817	0	TRUE
Nonspecific findings on examination of blood	symptoms	0.1993	-0.645	1.043	0.431	0.463	1.22055	0.524663	2.83772	20	5531	10	2454	0.643516	0.847069	not_significant	0.0865549	0.191441	2.8613	2.6	3.123	0.133	21.453	0	-0.0513	-0.058	-0.045	0.003	-15.79	0	TRUE
Nontoxic multinodular goiter	endocrine/metabolic	-0.6576	-1.504	0.189	0.432	-1.522	0.518093	0.222239	1.20804	11	5540	11	2453	0.127953	0.44489	not_significant	-0.285592	0.892949	2.859	2.598	3.12	0.133	21.434	0	-0.0511	-0.058	-0.045	0.003	-15.75	0	TRUE
Nontoxic nodular goiter	endocrine/metabolic	0.2345	-1.115	1.584	0.688	0.341	1.26428	0.327915	4.87441	10	5541	10	2454	0.733432	0.902489	not_significant	0.101842	0.13464	2.8611	2.6	3.122	0.133	21.451	0	-0.0513	-0.058	-0.045	0.003	-15.787	0	TRUE
Nontoxic uninodular goiter	endocrine/metabolic	0.4482	-0.194	1.09	0.328	1.368	1.56549	0.823658	2.97427	38	5513	13	2451	0.17127	0.500088	not_significant	0.194651	0.76632	2.8651	2.604	3.127	0.133	21.473	0	-0.0514	-0.058	-0.045	0.003	-15.823	0	TRUE
Nystagmus and other irregular eye movements	sense organs	0.6455	-0.917	2.208	0.797	0.81	1.90694	0.399716	9.0975	10	5541	10	2454	0.418217	0.725871	not_significant	0.280337	0.378598	2.8602	2.599	3.122	0.133	21.44	0	-0.0512	-0.058	-0.045	0.003	-15.781	0	TRUE
Obesity	endocrine/metabolic	-0.0185	-0.296	0.259	0.142	-0.13	0.98167	0.743787	1.29563	162	5389	80	2384	0.896295	0.95616	not_significant	-0.00803445	0.0475489	2.861	2.6	3.122	0.133	21.451	0	-0.0512	-0.058	-0.045	0.003	-15.767	0	TRUE
Obsessive-compulsive disorders	mental disorders	-1.2551	-2.802	0.292	0.789	-1.59	0.285047	0.0606886	1.3391	10	5541	10	2454	0.111859	0.433	not_significant	-0.545083	0.951329	2.8642	2.603	3.126	0.133	21.472	0	-0.0513	-0.058	-0.045	0.003	-15.799	0	TRUE
Obstruction of bile duct	digestive	-0.1347	-1.657	1.387	0.777	-0.173	0.873978	0.19071	4.00282	10	5541	10	2454	0.862326	0.940621	not_significant	-0.0584995	0.0643284	2.8605	2.599	3.122	0.133	21.442	0	-0.0512	-0.058	-0.045	0.003	-15.773	0	TRUE
Obstructive sleep apnea	neurological	0.2225	0.02	0.425	0.103	2.154	1.2492	1.0202	1.52959	367	5184	144	2320	0.0312492	0.214483	not_significant	0.0966305	1.50516	2.8629	2.601	3.124	0.133	21.455	0	-0.0516	-0.058	-0.045	0.003	-15.871	0	TRUE
Occlusion and stenosis of precerebral arteries	circulatory system	0.8574	-0.13	1.845	0.504	1.702	2.35702	0.878095	6.3281	16	5535	10	2454	0.0887521	0.399004	not_significant	0.372364	1.05182	2.8802	2.618	3.143	0.134	21.509	0	-0.0518	-0.058	-0.045	0.003	-15.872	0	TRUE
Occlusion of cerebral arteries, with cerebral infarction	circulatory system	0.8283	-1.631	3.288	1.255	0.66	2.28942	0.195734	26.7892	10	5541	10	2454	0.509236	0.786933	not_significant	0.359726	0.293081	2.8633	2.602	3.125	0.133	21.463	0	-0.0513	-0.058	-0.045	0.003	-15.799	0	TRUE
Oliguria and anuria	genitourinary	0.7065	-1.452	2.865	1.101	0.641	2.02688	0.234102	17.5491	10	5541	10	2454	0.52127	0.797283	not_significant	0.306829	0.282937	2.8601	2.599	3.122	0.133	21.443	0	-0.0512	-0.058	-0.045	0.003	-15.781	0	TRUE
Open wound of finger(s)	injuries & poisonings	-0.2551	-0.8	0.29	0.278	-0.917	0.774839	0.449329	1.33643	35	5516	22	2442	0.359038	0.700191	not_significant	-0.110789	0.444859	2.8605	2.599	3.122	0.133	21.448	0	-0.0512	-0.058	-0.045	0.003	-15.763	0	TRUE
Open wound of foot except toe(s) alone	injuries & poisonings	0.4028	-0.937	1.743	0.684	0.589	1.49601	0.391801	5.71446	10	5541	10	2454	0.555803	0.816801	not_significant	0.174934	0.255079	2.8615	2.6	3.123	0.133	21.453	0	-0.0513	-0.058	-0.045	0.003	-15.79	0	TRUE
Open wound of hand except finger(s)	injuries & poisonings	1.1895	0.093	2.286	0.559	2.127	3.28544	1.09746	9.83552	22	5529	10	2454	0.0334237	0.225025	not_significant	0.516593	1.47595	2.8714	2.61	3.133	0.134	21.487	0	-0.0516	-0.058	-0.045	0.003	-15.851	0	TRUE
Open wound of lip and mouth	injuries & poisonings	0.4697	-1.124	2.063	0.813	0.578	1.59951	0.324977	7.86954	10	5541	10	2454	0.563432	0.820353	not_significant	0.203988	0.249159	2.8609	2.599	3.122	0.133	21.449	0	-0.0513	-0.058	-0.045	0.003	-15.786	0	TRUE
Open wound of toe(s)	injuries & poisonings	1.057	-0.493	2.607	0.791	1.337	2.87772	0.610791	13.5583	10	5541	10	2454	0.181344	0.513665	not_significant	0.459049	0.741498	2.8645	2.603	3.126	0.133	21.468	0	-0.0514	-0.058	-0.045	0.003	-15.812	0	TRUE
Open wound or laceration of eye or eyelid	injuries & poisonings	1.1534	-0.402	2.708	0.793	1.454	3.16895	0.668981	14.9992	12	5539	10	2454	0.145994	0.467623	not_significant	0.500915	0.835666	2.8627	2.601	3.124	0.133	21.462	0	-0.0513	-0.058	-0.045	0.003	-15.807	0	TRUE
Open wounds of extremities	injuries & poisonings	0.7821	0.034	1.53	0.382	2.049	2.18606	1.03458	4.61818	38	5513	10	2454	0.0404233	0.255853	not_significant	0.339662	1.39337	2.8658	2.604	3.128	0.134	21.465	0	-0.0515	-0.058	-0.045	0.003	-15.829	0	TRUE
Open wounds of head; neck; and trunk	injuries & poisonings	1.188	-0.336	2.712	0.778	1.527	3.28051	0.714623	15.0594	12	5539	10	2454	0.126676	0.444612	not_significant	0.515942	0.897305	2.8643	2.603	3.126	0.133	21.463	0	-0.0514	-0.058	-0.045	0.003	-15.811	0	TRUE
Open-angle glaucoma	sense organs	0.8827	-0.7	2.466	0.808	1.093	2.41742	0.496585	11.7753	10	5541	10	2454	0.274404	0.630532	not_significant	0.383352	0.56161	2.8644	2.603	3.126	0.133	21.465	0	-0.0514	-0.058	-0.045	0.003	-15.807	0	TRUE
Optic atrophy	sense organs	0.3229	-0.726	1.372	0.535	0.603	1.38113	0.48384	3.94323	14	5537	10	2454	0.546341	0.808799	not_significant	0.140234	0.262536	2.8614	2.6	3.123	0.133	21.453	0	-0.0513	-0.058	-0.045	0.003	-15.791	0	TRUE
Optic neuritis/neuropathy	sense organs	0.7647	-0.796	2.325	0.796	0.96	2.14835	0.45113	10.2267	10	5541	10	2454	0.336825	0.684661	not_significant	0.332105	0.472596	2.8624	2.601	3.124	0.133	21.459	0	-0.0513	-0.058	-0.045	0.003	-15.798	0	TRUE
Orchitis and epididymitis	genitourinary	-0.8186	-1.41	-0.227	0.302	-2.712	0.441049	0.244143	0.796921	24	5527	22	2442	0.00668972	0.0833308	not_significant	-0.355513	2.17459	2.8723	2.611	3.134	0.134	21.509	0	-0.0514	-0.058	-0.045	0.003	-15.819	0	TRUE
Organic or persistent insomnia	neurological	1.6935	0.487	2.9	0.616	2.751	5.43848	1.62743	18.1741	31	5520	10	2454	0.0059344	0.0779684	not_significant	0.735478	2.22662	2.8668	2.605	3.129	0.134	21.468	0	-0.0515	-0.058	-0.045	0.003	-15.843	0	TRUE
Orthostatic hypotension	circulatory system	0.3219	-0.706	1.35	0.525	0.614	1.37975	0.493615	3.85743	15	5536	10	2454	0.539459	0.804753	not_significant	0.139799	0.268041	2.8608	2.599	3.122	0.133	21.448	0	-0.0513	-0.058	-0.045	0.003	-15.787	0	TRUE
Osteitis deformans and osteopathies associated with other disorders classified elsewhere	musculoskeletal	-0.3738	-2.8	2.052	1.238	-0.302	0.688115	0.0608101	7.78345	10	5541	10	2454	0.762653	0.914093	not_significant	-0.162339	0.117673	2.8617	2.6	3.123	0.133	21.454	0	-0.0513	-0.058	-0.045	0.003	-15.788	0	TRUE
Osteoarthritis; localized	musculoskeletal	2.0748	0.575	3.575	0.765	2.711	7.96295	1.77713	35.6946	16	5535	10	2454	0.00671225	0.0833308	not_significant	0.901074	2.17313	2.8982	2.635	3.161	0.134	21.608	0	-0.0523	-0.059	-0.046	0.003	-15.995	0	TRUE
Osteoarthrosis involving more than one site, but not specified as generalized	musculoskeletal	-1.1637	-3.565	1.238	1.225	-0.95	0.312328	0.028297	3.44871	10	5541	10	2454	0.342221	0.690319	not_significant	-0.505388	0.465694	2.8594	2.598	3.121	0.133	21.438	0	-0.0512	-0.058	-0.045	0.003	-15.767	0	TRUE
Osteoarthrosis NOS	musculoskeletal	0.5911	0.07	1.112	0.266	2.223	1.80597	1.07251	3.04043	58	5493	20	2444	0.0261929	0.190662	not_significant	0.256711	1.58182	2.8812	2.619	3.144	0.134	21.527	0	-0.0519	-0.058	-0.045	0.003	-15.902	0	TRUE
Osteoarthrosis, generalized	musculoskeletal	1.5649	0.034	3.096	0.781	2.004	4.7822	1.03458	22.1093	11	5540	10	2454	0.0450782	0.272273	not_significant	0.679627	1.34603	2.8794	2.617	3.142	0.134	21.529	0	-0.0518	-0.058	-0.045	0.003	-15.89	0	TRUE
Osteoarthrosis, localized, primary	musculoskeletal	0.0289	-0.231	0.289	0.133	0.218	1.02932	0.793739	1.33509	170	5381	100	2364	0.827762	0.930983	not_significant	0.0125511	0.0820944	2.8644	2.601	3.128	0.134	21.336	0	-0.0514	-0.058	-0.045	0.003	-15.635	0	TRUE
Osteoarthrosis, localized, secondary	musculoskeletal	0.3383	-0.376	1.052	0.364	0.929	1.40256	0.686602	2.86337	27	5524	11	2453	0.353134	0.696113	not_significant	0.146922	0.452061	2.8649	2.603	3.126	0.133	21.468	0	-0.0514	-0.058	-0.045	0.003	-15.809	0	TRUE
Osteochondritis dissecans	musculoskeletal	-0.3432	-2.768	2.082	1.237	-0.277	0.709496	0.0627875	8.02049	10	5541	10	2454	0.78148	0.916968	not_significant	-0.14905	0.107082	2.8616	2.6	3.123	0.133	21.453	0	-0.0513	-0.058	-0.045	0.003	-15.787	0	TRUE
Osteochondropathies	musculoskeletal	-1.5192	-3.231	0.192	0.873	-1.74	0.218887	0.039518	1.21167	10	5541	10	2454	0.0819161	0.387911	not_significant	-0.65978	1.08663	2.8628	2.601	3.124	0.133	21.46	0	-0.0513	-0.058	-0.045	0.003	-15.785	0	TRUE
Osteopenia or other disorder of bone and cartilage	musculoskeletal	0.5515	-0.042	1.145	0.303	1.821	1.73585	0.95887	3.14244	49	5502	15	2449	0.0686581	0.354331	not_significant	0.239513	1.16331	2.8674	2.606	3.129	0.134	21.474	0	-0.0515	-0.058	-0.045	0.003	-15.837	0	TRUE
Osteoporosis NOS	musculoskeletal	3.0669	1.052	5.082	1.028	2.983	21.4752	2.86337	161.096	29	5522	10	2454	0.00285762	0.0457652	mi_significant	1.33194	2.544	2.8978	2.635	3.161	0.134	21.595	0	-0.0523	-0.059	-0.046	0.003	-16.005	0	TRUE
Otalgia	sense organs	0.049	-0.356	0.454	0.207	0.237	1.05022	0.700473	1.5746	79	5472	36	2428	0.812418	0.926349	not_significant	0.0212804	0.0902204	2.8612	2.6	3.123	0.133	21.451	0	-0.0513	-0.058	-0.045	0.003	-15.786	0	TRUE
Other abnormal blood chemistry	symptoms	0.5091	0.274	0.744	0.12	4.249	1.66379	1.31521	2.10434	331	5220	99	2365	2.14767e-05	0.00162149	mi_significant	0.221099	4.66803	2.8656	2.604	3.127	0.134	21.456	0	-0.052	-0.058	-0.046	0.003	-15.964	0	TRUE
Other abnormal glucose	endocrine/metabolic	0.5513	0.287	0.815	0.135	4.093	1.73551	1.33242	2.25918	255	5296	78	2386	4.26527e-05	0.0022052	mi_significant	0.239427	4.37005	2.8848	2.623	3.147	0.134	21.558	0	-0.0524	-0.059	-0.046	0.003	-16.035	0	TRUE
Other abnormality of urination	genitourinary	0.6173	0.21	1.025	0.208	2.971	1.85392	1.23368	2.7871	103	5448	33	2431	0.00296776	0.0468198	mi_significant	0.26809	2.52757	2.8892	2.627	3.152	0.134	21.568	0	-0.0522	-0.059	-0.046	0.003	-15.973	0	TRUE
Other acquired deformities of limbs	musculoskeletal	0.2391	-0.764	1.243	0.512	0.467	1.27011	0.465799	3.466	13	5538	10	2454	0.640443	0.847069	not_significant	0.10384	0.193519	2.8629	2.601	3.124	0.133	21.453	0	-0.0513	-0.058	-0.045	0.003	-15.789	0	TRUE
Other acquired musculoskeletal deformity	musculoskeletal	0.1722	-0.446	0.79	0.315	0.546	1.18792	0.640184	2.2034	36	5515	15	2449	0.585071	0.829869	not_significant	0.0747855	0.232791	2.8618	2.6	3.123	0.133	21.453	0	-0.0513	-0.058	-0.045	0.003	-15.792	0	TRUE
Other acute and subacute forms of ischemic heart disease	circulatory system	0.5583	-1.063	2.179	0.827	0.675	1.7477	0.345418	8.83746	10	5541	10	2454	0.49966	0.775537	not_significant	0.242467	0.301325	2.8626	2.601	3.124	0.133	21.458	0	-0.0513	-0.058	-0.045	0.003	-15.795	0	TRUE
Other allied disorders of spine	musculoskeletal	1.5658	-0.509	3.641	1.059	1.479	4.7865	0.601096	38.1299	10	5541	10	2454	0.139164	0.45682	not_significant	0.680018	0.856474	2.8632	2.602	3.125	0.133	21.461	0	-0.0513	-0.058	-0.045	0.003	-15.806	0	TRUE
Other alveolar and parietoalveolar pneumonopathy	respiratory	1.1937	-0.465	2.852	0.846	1.41	3.29927	0.628135	17.3224	10	5541	10	2454	0.158399	0.483895	not_significant	0.518417	0.800247	2.8745	2.612	3.137	0.134	21.493	0	-0.0516	-0.058	-0.045	0.003	-15.846	0	TRUE
Other and unspecified coagulation defects	hematopoietic	0.9058	-0.391	2.202	0.661	1.369	2.47391	0.67638	9.04308	12	5539	10	2454	0.170869	0.500088	not_significant	0.393384	0.767337	2.8671	2.605	3.129	0.134	21.471	0	-0.0514	-0.058	-0.045	0.003	-15.819	0	TRUE
Other and unspecified congenital anomalies	congenital anomalies	0.3502	-0.974	1.674	0.676	0.518	1.41935	0.37757	5.33346	10	5541	10	2454	0.604187	0.830271	not_significant	0.15209	0.218829	2.8611	2.6	3.123	0.133	21.45	0	-0.0513	-0.058	-0.045	0.003	-15.787	0	TRUE
Other and unspecified disc disorder	musculoskeletal	0.471	-0.416	1.358	0.453	1.041	1.60159	0.65968	3.88841	19	5532	10	2454	0.29796	0.657502	not_significant	0.204553	0.525842	2.8655	2.604	3.127	0.133	21.468	0	-0.0514	-0.058	-0.045	0.003	-15.812	0	TRUE
Other and unspecified disorders of the nervous system	neurological	2.458	0.416	4.5	1.042	2.359	11.6814	1.51589	90.0171	17	5534	10	2454	0.018305	0.158593	not_significant	1.0675	1.73743	2.8785	2.616	3.141	0.134	21.518	0	-0.0518	-0.058	-0.045	0.003	-15.891	0	TRUE
Other anemias	hematopoietic	0.844	0.446	1.242	0.203	4.161	2.32565	1.56205	3.46253	139	5412	32	2432	3.16949e-05	0.0018612	mi_significant	0.366545	4.49901	2.8838	2.621	3.146	0.134	21.522	0	-0.0522	-0.059	-0.046	0.003	-15.979	0	TRUE
Other aneurysm	circulatory system	-0.2875	-2.091	1.516	0.92	-0.313	0.750137	0.123564	4.55397	10	5541	10	2454	0.754636	0.914093	not_significant	-0.12486	0.122263	2.861	2.6	3.122	0.133	21.451	0	-0.0512	-0.058	-0.045	0.003	-15.783	0	TRUE
Other arthropathies	musculoskeletal	0.4586	-1.243	2.16	0.868	0.528	1.58186	0.288517	8.67114	10	5541	10	2454	0.597297	0.830271	not_significant	0.199167	0.22381	2.8626	2.601	3.124	0.133	21.457	0	-0.0513	-0.058	-0.045	0.003	-15.793	0	TRUE
Other benign neoplasm of connective and other soft tissue	neoplasms	0.4929	-0.506	1.492	0.51	0.967	1.63706	0.602902	4.44598	18	5533	10	2454	0.333546	0.683251	not_significant	0.214064	0.476845	2.86	2.599	3.121	0.133	21.444	0	-0.0513	-0.058	-0.045	0.003	-15.787	0	TRUE
Other cardiac conduction disorders	circulatory system	0.516	-1.803	2.835	1.183	0.436	1.67531	0.164804	17.0304	10	5541	10	2454	0.662815	0.861098	not_significant	0.224096	0.178608	2.8617	2.6	3.123	0.133	21.453	0	-0.0513	-0.058	-0.045	0.003	-15.789	0	TRUE
Other cardiomyopathy	circulatory system	-0.299	-3.204	2.606	1.482	-0.202	0.741559	0.0405995	13.5448	10	5541	10	2454	0.840114	0.930983	not_significant	-0.129854	0.075662	2.8606	2.599	3.122	0.133	21.445	0	-0.0512	-0.058	-0.045	0.003	-15.777	0	TRUE
Other chronic ischemic heart disease, unspecified	circulatory system	-0.0077	-1.07	1.054	0.542	-0.014	0.99233	0.343009	2.8691	10	5541	10	2454	0.988636	0.99428	not_significant	-0.00334407	0.00496379	2.861	2.599	3.123	0.133	21.436	0	-0.0512	-0.058	-0.045	0.003	-15.767	0	TRUE
Other chronic nonalcoholic liver disease	digestive	0.5803	0.245	0.915	0.171	3.396	1.78657	1.27762	2.49678	173	5378	46	2418	0.000683455	0.0168809	mi_significant	0.252021	3.16529	2.8577	2.596	3.119	0.134	21.402	0	-0.0515	-0.058	-0.045	0.003	-15.842	0	TRUE
Other CNS infection and poliomyelitis	neurological	-0.5809	-3.353	2.192	1.415	-0.411	0.559395	0.0349793	8.9531	10	5541	10	2454	0.681352	0.869261	not_significant	-0.252282	0.166629	2.8608	2.599	3.122	0.133	21.449	0	-0.0512	-0.058	-0.045	0.003	-15.781	0	TRUE
Other conditions of brain, NOS	neurological	0.2934	-0.389	0.975	0.348	0.843	1.34098	0.677734	2.65117	31	5520	12	2452	0.39924	0.717068	not_significant	0.127422	0.398766	2.8629	2.601	3.124	0.133	21.459	0	-0.0513	-0.058	-0.045	0.003	-15.801	0	TRUE
Other congenital anomalies of lower limb, including pelvic girdle	congenital anomalies	0.4521	-1.821	2.725	1.16	0.39	1.57161	0.161864	15.2564	10	5541	10	2454	0.696679	0.879457	not_significant	0.196345	0.156967	2.8614	2.6	3.123	0.133	21.453	0	-0.0513	-0.058	-0.045	0.003	-15.788	0	TRUE
Other demyelinating diseases of central nervous system	neurological	0.6969	-1.513	2.907	1.127	0.618	2.00752	0.220248	18.3018	10	5541	10	2454	0.5365	0.804753	not_significant	0.30266	0.27043	2.8614	2.6	3.123	0.133	21.453	0	-0.0513	-0.058	-0.045	0.003	-15.789	0	TRUE
Other derangement of joint	musculoskeletal	0.1542	-0.282	0.59	0.222	0.693	1.16672	0.754274	1.80399	71	5480	31	2433	0.488028	0.767898	not_significant	0.0669682	0.311555	2.8627	2.601	3.124	0.133	21.46	0	-0.0513	-0.058	-0.045	0.003	-15.8	0	TRUE
Other diseases of blood and blood-forming organs	hematopoietic	0.406	-0.329	1.141	0.375	1.083	1.5008	0.719643	3.1299	27	5524	11	2453	0.278799	0.637858	not_significant	0.176324	0.554709	2.8675	2.606	3.129	0.134	21.473	0	-0.0515	-0.058	-0.045	0.003	-15.818	0	TRUE
Other diseases of lung	respiratory	1.4685	0.512	2.425	0.488	3.01	4.34272	1.66863	11.3022	38	5513	10	2454	0.0026095	0.0425005	mi_significant	0.637761	2.58344	2.8766	2.614	3.139	0.134	21.494	0	-0.0518	-0.058	-0.045	0.003	-15.885	0	TRUE
Other diseases of respiratory system, NEC	respiratory	-0.245	-1.135	0.645	0.454	-0.54	0.782705	0.321422	1.90599	14	5537	10	2454	0.589441	0.830271	not_significant	-0.106402	0.229559	2.8617	2.6	3.123	0.133	21.455	0	-0.0512	-0.058	-0.045	0.003	-15.784	0	TRUE
Other diseases of respiratory system, not elsewhere classified	respiratory	0.4525	-1.254	2.159	0.871	0.52	1.57224	0.285361	8.66247	10	5541	10	2454	0.603288	0.830271	not_significant	0.196518	0.219475	2.8627	2.601	3.124	0.133	21.455	0	-0.0513	-0.058	-0.045	0.003	-15.792	0	TRUE
Other diseases of the teeth and supporting structures	digestive	1.1015	-0.151	2.355	0.639	1.723	3.00868	0.859848	10.5381	17	5534	10	2454	0.0848664	0.390503	not_significant	0.478375	1.07126	2.8646	2.603	3.126	0.133	21.461	0	-0.0514	-0.058	-0.045	0.003	-15.813	0	TRUE
Other disorders of arteries and arterioles	circulatory system	0.4171	-0.691	1.525	0.565	0.738	1.51755	0.501075	4.59514	11	5540	10	2454	0.460541	0.752383	not_significant	0.181144	0.336732	2.8653	2.604	3.127	0.134	21.461	0	-0.0514	-0.058	-0.045	0.003	-15.801	0	TRUE
Other disorders of biliary tract	digestive	1.6699	-0.401	3.741	1.057	1.58	5.31164	0.66965	42.1401	10	5541	10	2454	0.114006	0.433	not_significant	0.725228	0.943074	2.8636	2.602	3.125	0.133	21.46	0	-0.0514	-0.058	-0.045	0.003	-15.807	0	TRUE
Other disorders of bladder	genitourinary	1.0047	-0.303	2.312	0.667	1.506	2.73109	0.738599	10.0946	13	5538	10	2454	0.132121	0.447603	not_significant	0.436336	0.879027	2.8674	2.606	3.129	0.133	21.483	0	-0.0514	-0.058	-0.045	0.003	-15.831	0	TRUE
Other disorders of bone and cartilage	musculoskeletal	0.0859	-0.301	0.473	0.197	0.436	1.0897	0.740078	1.6048	85	5466	42	2422	0.663135	0.861098	not_significant	0.0373059	0.178398	2.8634	2.602	3.125	0.133	21.451	0	-0.0513	-0.058	-0.045	0.003	-15.78	0	TRUE
Other disorders of carbohydrate transport and metabolism	endocrine/metabolic	-0.9397	-3.712	1.833	1.415	-0.664	0.390745	0.0244286	6.25262	10	5541	10	2454	0.506512	0.78387	not_significant	-0.408107	0.29541	2.8619	2.6	3.123	0.133	21.456	0	-0.0513	-0.058	-0.045	0.003	-15.788	0	TRUE
Other disorders of cervical region	musculoskeletal	-0.3009	-1.432	0.83	0.577	-0.521	0.740152	0.238831	2.29332	10	5541	10	2454	0.602156	0.830271	not_significant	-0.130679	0.220291	2.8614	2.6	3.123	0.133	21.453	0	-0.0512	-0.058	-0.045	0.003	-15.783	0	TRUE
Other disorders of ear	sense organs	-0.0618	-0.554	0.43	0.251	-0.246	0.940071	0.574647	1.53726	50	5501	25	2439	0.805625	0.922584	not_significant	-0.0268394	0.0938672	2.8613	2.6	3.123	0.133	21.452	0	-0.0512	-0.058	-0.045	0.003	-15.781	0	TRUE
Other disorders of eye	sense organs	0.6036	-0.163	1.371	0.391	1.542	1.82869	0.849591	3.93929	30	5521	10	2454	0.123001	0.443431	not_significant	0.26214	0.91009	2.8659	2.604	3.127	0.133	21.478	0	-0.0514	-0.058	-0.045	0.003	-15.829	0	TRUE
Other disorders of eyelids	sense organs	0.8444	0.219	1.47	0.319	2.646	2.32658	1.24483	4.34924	51	5500	13	2451	0.00813796	0.0905455	not_significant	0.366718	2.08948	2.8782	2.616	3.14	0.134	21.533	0	-0.0518	-0.058	-0.045	0.003	-15.913	0	TRUE
Other disorders of gallbladder	digestive	1.0625	-0.175	2.3	0.631	1.683	2.8936	0.839457	9.97418	18	5533	10	2454	0.0924156	0.405132	not_significant	0.461438	1.03425	2.8616	2.6	3.123	0.133	21.446	0	-0.0513	-0.058	-0.045	0.003	-15.797	0	TRUE
Other disorders of intestine	digestive	0.3701	-0.178	0.918	0.28	1.323	1.44788	0.836942	2.50428	53	5498	18	2446	0.185752	0.518274	not_significant	0.160732	0.731066	2.8621	2.601	3.124	0.133	21.457	0	-0.0513	-0.058	-0.045	0.003	-15.81	0	TRUE
Other disorders of lipoid metabolism	endocrine/metabolic	0.7198	-0.553	1.992	0.649	1.109	2.05402	0.575222	7.33018	13	5538	10	2454	0.267508	0.622811	not_significant	0.312605	0.572663	2.8609	2.599	3.122	0.133	21.449	0	-0.0513	-0.058	-0.045	0.003	-15.791	0	TRUE
Other disorders of liver	digestive	0.9766	0.348	1.605	0.321	3.046	2.65541	1.41623	4.97786	64	5487	12	2452	0.00231608	0.0414932	mi_significant	0.424132	2.63525	2.8655	2.604	3.127	0.134	21.449	0	-0.0515	-0.058	-0.045	0.003	-15.843	0	TRUE
Other disorders of male genital organs	genitourinary	-0.1113	-0.378	0.156	0.136	-0.817	0.89467	0.685231	1.16883	180	5371	85	2379	0.414006	0.724823	not_significant	-0.048337	0.382994	2.8671	2.605	3.129	0.134	21.461	0	-0.0513	-0.058	-0.045	0.003	-15.798	0	TRUE
Other disorders of metabolism	endocrine/metabolic	0.7128	-0.324	1.75	0.529	1.347	2.03969	0.72325	5.7546	16	5535	10	2454	0.177927	0.510788	not_significant	0.309565	0.749759	2.8682	2.606	3.13	0.134	21.479	0	-0.0515	-0.058	-0.045	0.003	-15.827	0	TRUE
Other disorders of middle ear and mastoid	sense organs	1.2198	-1.135	3.574	1.201	1.015	3.38651	0.321422	35.6589	10	5541	10	2454	0.309882	0.664976	not_significant	0.529752	0.508803	2.8636	2.602	3.125	0.133	21.47	0	-0.0513	-0.058	-0.045	0.003	-15.809	0	TRUE
Other disorders of neurohypophysis	endocrine/metabolic	0.5813	-0.738	1.9	0.673	0.864	1.78836	0.478069	6.68589	10	5541	10	2454	0.387768	0.712169	not_significant	0.252455	0.411428	2.8626	2.601	3.124	0.133	21.457	0	-0.0513	-0.058	-0.045	0.003	-15.797	0	TRUE
Other disorders of peritoneum	digestive	0.2129	-1.461	1.887	0.854	0.249	1.23726	0.232004	6.59954	10	5541	10	2454	0.803115	0.920708	not_significant	0.0924613	0.095222	2.8613	2.6	3.123	0.133	21.452	0	-0.0513	-0.058	-0.045	0.003	-15.786	0	TRUE
Other disorders of prostate	genitourinary	1.1074	-0.01	2.225	0.57	1.943	3.02648	0.99005	9.25348	16	5535	10	2454	0.0520295	0.303841	not_significant	0.480938	1.28375	2.8775	2.615	3.14	0.134	21.515	0	-0.0517	-0.058	-0.045	0.003	-15.876	0	TRUE
Other disorders of soft tissues	musculoskeletal	0.0092	-0.377	0.395	0.197	0.047	1.00924	0.685916	1.48438	84	5467	41	2423	0.962719	0.982774	not_significant	0.00399551	0.0165004	2.8612	2.6	3.123	0.133	21.451	0	-0.0513	-0.058	-0.045	0.003	-15.778	0	TRUE
Other disorders of stomach and duodenum	digestive	0.376	-0.091	0.843	0.238	1.579	1.45645	0.913018	2.32333	74	5477	25	2439	0.114446	0.433	not_significant	0.163295	0.941398	2.8629	2.601	3.124	0.133	21.455	0	-0.0514	-0.058	-0.045	0.003	-15.818	0	TRUE
Other disorders of synovium, tendon, and bursa	musculoskeletal	-0.2517	-0.686	0.183	0.222	-1.136	0.777478	0.503586	1.20081	54	5497	35	2429	0.255899	0.611957	not_significant	-0.109312	0.591932	2.8589	2.598	3.12	0.133	21.434	0	-0.0511	-0.057	-0.045	0.003	-15.737	0	TRUE
Other disorders of testis	genitourinary	3.0831	1.1	5.066	1.012	3.047	21.826	3.00417	158.539	51	5500	10	2454	0.00231209	0.0414932	mi_significant	1.33897	2.636	2.8492	2.587	3.111	0.134	21.315	0	-0.0512	-0.058	-0.045	0.003	-15.723	0	TRUE
Other disorders of the kidney and ureters	genitourinary	0.8223	0.199	1.445	0.318	2.587	2.27573	1.22018	4.24185	53	5498	13	2451	0.00968135	0.101319	not_significant	0.35712	2.01406	2.8737	2.612	3.136	0.134	21.504	0	-0.0517	-0.058	-0.045	0.003	-15.884	0	TRUE
Other disorders of thyroid	endocrine/metabolic	0.3571	-0.589	1.303	0.483	0.74	1.42918	0.554882	3.68032	17	5534	10	2454	0.459302	0.752383	not_significant	0.155087	0.337902	2.862	2.601	3.123	0.133	21.454	0	-0.0513	-0.058	-0.045	0.003	-15.794	0	TRUE
Other disorders of tympanic membrane	sense organs	-1.2733	-4.079	1.532	1.432	-0.889	0.279906	0.0169244	4.62742	10	5541	10	2454	0.373755	0.702655	not_significant	-0.552987	0.427413	2.8635	2.602	3.125	0.133	21.464	0	-0.0513	-0.058	-0.045	0.003	-15.798	0	TRUE
Other disorders of urethra and urinary tract	genitourinary	-0.519	-2.038	1	0.775	-0.67	0.595115	0.130289	2.71828	10	5541	10	2454	0.503121	0.779763	not_significant	-0.225399	0.298328	2.8615	2.6	3.123	0.133	21.455	0	-0.0512	-0.058	-0.045	0.003	-15.785	0	TRUE
Other dyschromia	dermatologic	-0.0275	-0.263	0.208	0.12	-0.229	0.972875	0.768742	1.23121	224	5327	114	2350	0.819037	0.928887	not_significant	-0.0119431	0.0866964	2.8605	2.599	3.122	0.133	21.443	0	-0.0512	-0.058	-0.045	0.003	-15.742	0	TRUE
Other dyspnea	respiratory	0.0386	-0.197	0.274	0.12	0.321	1.03935	0.821191	1.31521	240	5311	110	2354	0.747928	0.911389	not_significant	0.0167638	0.12614	2.861	2.6	3.122	0.133	21.451	0	-0.0513	-0.058	-0.045	0.003	-15.785	0	TRUE
Other endocrine disorders	endocrine/metabolic	2.023	0.577	3.469	0.738	2.742	7.56097	1.78069	32.1046	29	5522	10	2454	0.00610007	0.0786314	not_significant	0.878578	2.21466	2.8667	2.605	3.128	0.134	21.464	0	-0.0515	-0.058	-0.045	0.003	-15.839	0	TRUE
Other forms of chronic heart disease	circulatory system	-0.1197	-1.009	0.77	0.454	-0.264	0.887187	0.364583	2.15977	14	5537	10	2454	0.792045	0.916968	not_significant	-0.051985	0.10125	2.8608	2.599	3.122	0.133	21.449	0	-0.0512	-0.058	-0.045	0.003	-15.778	0	TRUE
Other headache syndromes	neurological	0.6442	0.302	0.986	0.175	3.69	1.90446	1.35256	2.68049	175	5376	43	2421	0.000224145	0.00816971	mi_significant	0.279773	3.64947	2.8543	2.593	3.116	0.134	21.369	0	-0.0515	-0.058	-0.045	0.003	-15.821	0	TRUE
Other hemoglobinopathies	hematopoietic	-0.2151	-1.051	0.621	0.427	-0.504	0.806461	0.349588	1.86079	16	5535	10	2454	0.614202	0.834462	not_significant	-0.0934167	0.211689	2.8616	2.6	3.123	0.133	21.454	0	-0.0512	-0.058	-0.045	0.003	-15.783	0	TRUE
Other hereditary hemolytic anemias	hematopoietic	1.4656	-0.667	3.598	1.088	1.347	4.33014	0.513246	36.5251	10	5541	10	2454	0.177892	0.510788	not_significant	0.636502	0.749844	2.8629	2.601	3.124	0.133	21.459	0	-0.0513	-0.058	-0.045	0.003	-15.803	0	TRUE
Other hypertensive complications	circulatory system	1.1351	0.304	1.967	0.424	2.676	3.11148	1.35527	7.1492	37	5514	10	2454	0.00745873	0.0856943	not_significant	0.492968	2.12734	2.8764	2.614	3.139	0.134	21.508	0	-0.0518	-0.058	-0.045	0.003	-15.888	0	TRUE
Other hypertrophic and atrophic conditions of skin	dermatologic	0.2962	-0.03	0.623	0.167	1.778	1.34474	0.970446	1.86451	142	5409	52	2412	0.0753963	0.372738	not_significant	0.128638	1.12265	2.8635	2.602	3.125	0.133	21.457	0	-0.0515	-0.058	-0.045	0.003	-15.834	0	TRUE
Other ill-defined and unknown causes of morbidity and mortality		0.9528	0.694	1.212	0.132	7.206	2.59296	2.00171	3.3602	391	5160	73	2391	5.74106e-13	3.03415e-10	mi_significant	0.413796	12.241	2.8466	2.583	3.11	0.134	21.191	0	-0.052	-0.058	-0.046	0.003	-15.884	0	TRUE
Other infectious and parasitic diseases	infectious diseases	0.9993	-0.06	2.059	0.541	1.848	2.71638	0.941765	7.83813	26	5525	10	2454	0.0645475	0.342848	not_significant	0.43399	1.19012	2.8556	2.594	3.117	0.133	21.406	0	-0.0512	-0.058	-0.045	0.003	-15.763	0	TRUE
Other inflammatory disorders of male genital organs	genitourinary	-0.1835	-1.469	1.102	0.656	-0.28	0.832352	0.230156	3.01018	10	5541	10	2454	0.779641	0.916968	not_significant	-0.079693	0.108105	2.8611	2.6	3.123	0.133	21.451	0	-0.0512	-0.058	-0.045	0.003	-15.783	0	TRUE
Other intestinal obstruction	digestive	0.7879	-0.189	1.765	0.499	1.58	2.19877	0.827787	5.84157	25	5526	10	2454	0.11407	0.433	not_significant	0.342181	0.94283	2.8585	2.597	3.12	0.133	21.426	0	-0.0512	-0.058	-0.045	0.003	-15.779	0	TRUE
Other local infections of skin and subcutaneous tissue	dermatologic	0.4048	-0.124	0.933	0.27	1.501	1.499	0.88338	2.54212	59	5492	19	2445	0.133394	0.449037	not_significant	0.175802	0.874863	2.8617	2.6	3.123	0.133	21.448	0	-0.0514	-0.058	-0.045	0.003	-15.808	0	TRUE
Other mental disorder	mental disorders	-0.5337	-1.87	0.803	0.682	-0.783	0.586431	0.154124	2.23223	10	5541	10	2454	0.433808	0.741128	not_significant	-0.231783	0.362703	2.8613	2.6	3.123	0.133	21.452	0	-0.0512	-0.058	-0.045	0.003	-15.781	0	TRUE
Other nonspecific findings on examination of urine	genitourinary	0.2911	-0.386	0.968	0.345	0.843	1.3379	0.679771	2.63267	33	5518	12	2452	0.399196	0.717068	not_significant	0.126423	0.398814	2.8616	2.6	3.123	0.133	21.452	0	-0.0513	-0.058	-0.045	0.003	-15.796	0	TRUE
Other nutritional deficiency	endocrine/metabolic	0.3494	-2.062	2.761	1.23	0.284	1.41822	0.127199	15.8157	10	5541	10	2454	0.776416	0.915369	not_significant	0.151742	0.109905	2.8619	2.6	3.123	0.133	21.453	0	-0.0513	-0.058	-0.045	0.003	-15.787	0	TRUE
Other open wound of head and face	injuries & poisonings	0.123	-0.67	0.916	0.404	0.304	1.13088	0.511709	2.49927	21	5530	10	2454	0.760979	0.914093	not_significant	0.0534182	0.118627	2.8612	2.6	3.123	0.133	21.452	0	-0.0513	-0.058	-0.045	0.003	-15.788	0	TRUE
Other paralytic syndromes	neurological	1.3491	-0.768	3.466	1.08	1.249	3.85396	0.46394	32.0085	10	5541	10	2454	0.211707	0.553896	not_significant	0.585907	0.674265	2.8617	2.6	3.123	0.133	21.445	0	-0.0513	-0.058	-0.045	0.003	-15.789	0	TRUE
Other peripheral nerve disorders	neurological	0.4444	0.073	0.816	0.19	2.345	1.55955	1.07573	2.26144	117	5434	40	2424	0.019036	0.162267	not_significant	0.193	1.72042	2.8722	2.61	3.134	0.134	21.507	0	-0.0517	-0.058	-0.045	0.003	-15.892	0	TRUE
Other pulmonary inflamation or edema	respiratory	0.7842	-0.799	2.367	0.808	0.971	2.19065	0.449779	10.6653	10	5541	10	2454	0.331659	0.680706	not_significant	0.340574	0.479308	2.8629	2.601	3.124	0.133	21.458	0	-0.0513	-0.058	-0.045	0.003	-15.798	0	TRUE
Other retinal disorders	sense organs	0.7243	0.155	1.294	0.291	2.492	2.06329	1.16766	3.64735	58	5493	16	2448	0.0127107	0.124042	not_significant	0.314559	1.89583	2.875	2.613	3.137	0.134	21.517	0	-0.0517	-0.058	-0.045	0.003	-15.895	0	TRUE
Other signs and symptoms in breast	genitourinary	-0.7346	-3.573	2.104	1.448	-0.507	0.479697	0.0280715	8.1989	10	5541	10	2454	0.611956	0.83304	not_significant	-0.319033	0.21328	2.8611	2.6	3.122	0.133	21.452	0	-0.0512	-0.058	-0.045	0.003	-15.783	0	TRUE
Other signs and symptoms involving emotional state		-0.1767	-0.923	0.569	0.381	-0.464	0.838031	0.397325	1.7665	21	5530	11	2453	0.642389	0.847069	not_significant	-0.0767398	0.192202	2.8619	2.6	3.123	0.133	21.456	0	-0.0512	-0.058	-0.045	0.003	-15.786	0	TRUE
Other specified cardiac dysrhythmias	circulatory system	0.3138	-0.112	0.739	0.217	1.445	1.36862	0.894044	2.09384	80	5471	32	2432	0.1485	0.471366	not_significant	0.136282	0.828272	2.8689	2.607	3.131	0.134	21.484	0	-0.0515	-0.058	-0.045	0.003	-15.84	0	TRUE
Other specified congenital anomalies of kidney	congenital anomalies	0.9452	-1.235	3.126	1.112	0.85	2.57333	0.290835	22.7827	10	5541	10	2454	0.395517	0.717068	not_significant	0.410495	0.402835	2.8619	2.6	3.123	0.133	21.453	0	-0.0513	-0.058	-0.045	0.003	-15.791	0	TRUE
Other specified congenital anomalies of nervous system	congenital anomalies	1.5603	-0.539	3.659	1.071	1.457	4.76025	0.583331	38.8225	10	5541	10	2454	0.145121	0.467623	not_significant	0.67763	0.838268	2.8652	2.604	3.127	0.133	21.47	0	-0.0514	-0.058	-0.045	0.003	-15.815	0	TRUE
Other specified diseases of hair and hair follicles	dermatologic	-0.0107	-0.534	0.512	0.267	-0.04	0.989357	0.586255	1.66863	45	5506	22	2442	0.967897	0.982774	not_significant	-0.00464695	0.0141708	2.8611	2.6	3.122	0.133	21.452	0	-0.0512	-0.058	-0.045	0.003	-15.781	0	TRUE
Other specified diseases of sebaceous glands	dermatologic	0.1938	-0.217	0.604	0.21	0.925	1.21385	0.80493	1.82942	81	5470	34	2430	0.355017	0.696202	not_significant	0.0841663	0.449751	2.8636	2.602	3.125	0.133	21.46	0	-0.0514	-0.058	-0.045	0.003	-15.806	0	TRUE
Other specified disorders involving the immune mechanism	endocrine/metabolic	1.173	-0.124	2.469	0.661	1.773	3.23167	0.88338	11.8106	14	5537	10	2454	0.0761856	0.374426	not_significant	0.509427	1.11813	2.8718	2.61	3.134	0.134	21.499	0	-0.0516	-0.058	-0.045	0.003	-15.853	0	TRUE
Other specified disorders of plasma protein metabolism	endocrine/metabolic	1.6886	-0.376	3.753	1.053	1.603	5.4119	0.686602	42.6488	11	5540	10	2454	0.108911	0.426368	not_significant	0.73335	0.962926	2.8619	2.6	3.123	0.133	21.449	0	-0.0513	-0.058	-0.045	0.003	-15.796	0	TRUE
Other specified erythematous conditions	dermatologic	0.2856	-0.456	1.027	0.378	0.755	1.33056	0.633814	2.79268	27	5524	10	2454	0.450256	0.751572	not_significant	0.124035	0.346541	2.8616	2.6	3.123	0.133	21.454	0	-0.0513	-0.058	-0.045	0.003	-15.795	0	TRUE
Other specified gastritis	digestive	0.7889	-0.781	2.359	0.801	0.985	2.20097	0.457948	10.5804	10	5541	10	2454	0.324612	0.67716	not_significant	0.342615	0.488636	2.8616	2.6	3.123	0.133	21.45	0	-0.0513	-0.058	-0.045	0.003	-15.791	0	TRUE
Other sprains and strains		-0.1073	-0.92	0.705	0.414	-0.259	0.898256	0.398519	2.02385	18	5533	10	2454	0.795716	0.917964	not_significant	-0.0465998	0.0992421	2.8614	2.6	3.123	0.133	21.453	0	-0.0512	-0.058	-0.045	0.003	-15.785	0	TRUE
Other symptoms		0.2669	-0.106	0.64	0.19	1.402	1.30591	0.899425	1.89648	109	5442	40	2424	0.160972	0.488787	not_significant	0.115913	0.793251	2.8613	2.6	3.123	0.133	21.447	0	-0.0514	-0.058	-0.045	0.003	-15.812	0	TRUE
Other symptoms involving abdomen and pelvis	digestive	-0.0223	-0.785	0.741	0.389	-0.057	0.977947	0.45612	2.09803	21	5530	11	2453	0.954275	0.982774	not_significant	-0.00968477	0.0203263	2.861	2.6	3.122	0.133	21.45	0	-0.0512	-0.058	-0.045	0.003	-15.779	0	TRUE
Other symptoms involving urinary system	genitourinary	0.9261	0.253	1.599	0.343	2.698	2.52464	1.28788	4.94808	46	5505	11	2453	0.00697733	0.0834421	not_significant	0.4022	2.15631	2.8797	2.618	3.142	0.134	21.532	0	-0.0519	-0.058	-0.045	0.003	-15.914	0	TRUE
Other symptoms referable to back	musculoskeletal	-0.6576	-1.436	0.12	0.397	-1.657	0.518093	0.237877	1.1275	14	5537	13	2451	0.0975603	0.415811	not_significant	-0.285592	1.01073	2.8606	2.599	3.122	0.133	21.444	0	-0.0512	-0.058	-0.045	0.003	-15.759	0	TRUE
Other symptoms/disorders or the urinary system	genitourinary	1.2838	-0.303	2.87	0.809	1.586	3.61033	0.738599	17.637	13	5538	10	2454	0.112713	0.433	not_significant	0.557547	0.948027	2.8639	2.602	3.125	0.133	21.466	0	-0.0514	-0.058	-0.045	0.003	-15.814	0	TRUE
Other tests		0.956	0.545	1.367	0.21	4.555	2.60127	1.72461	3.92356	154	5397	28	2436	5.2426e-06	0.000615714	mi_significant	0.415186	5.28045	2.855	2.593	3.117	0.134	21.36	0	-0.0515	-0.058	-0.045	0.003	-15.832	0	TRUE
Other unspecified back disorders	musculoskeletal	0.2062	-1.446	1.859	0.843	0.245	1.229	0.23551	6.41732	10	5541	10	2454	0.806756	0.92288	not_significant	0.0895515	0.0932577	2.8612	2.6	3.123	0.133	21.452	0	-0.0513	-0.058	-0.045	0.003	-15.787	0	TRUE
Other upper respiratory disease	respiratory	0.2941	0.046	0.543	0.127	2.32	1.34192	1.04707	1.72116	261	5290	90	2374	0.0203502	0.169904	not_significant	0.127726	1.69143	2.8536	2.592	3.115	0.133	21.385	0	-0.0514	-0.058	-0.045	0.003	-15.813	0	TRUE
Other venous embolism and thrombosis	circulatory system	0.9286	-0.068	1.925	0.509	1.826	2.53096	0.93426	6.85515	22	5529	10	2454	0.0678488	0.354331	not_significant	0.403286	1.16846	2.8682	2.606	3.13	0.134	21.481	0	-0.0515	-0.058	-0.045	0.003	-15.837	0	TRUE
Other vitamin B12 deficiency anemia	hematopoietic	-0.3775	-1.28	0.525	0.46	-0.82	0.685573	0.278037	1.69046	11	5540	10	2454	0.412356	0.724823	not_significant	-0.163946	0.384728	2.8589	2.597	3.12	0.133	21.43	0	-0.0512	-0.058	-0.045	0.003	-15.753	0	TRUE
Otitis externa	sense organs	0.0109	-0.398	0.42	0.209	0.052	1.01096	0.671662	1.52196	74	5477	36	2428	0.958396	0.982774	not_significant	0.00473381	0.0184549	2.8612	2.6	3.123	0.133	21.452	0	-0.0513	-0.058	-0.045	0.003	-15.779	0	TRUE
Otitis media	sense organs	-0.2061	-0.737	0.324	0.271	-0.762	0.813752	0.478547	1.38265	40	5511	22	2442	0.44625	0.748708	not_significant	-0.0895081	0.350422	2.8625	2.601	3.124	0.133	21.46	0	-0.0512	-0.058	-0.045	0.003	-15.784	0	TRUE
Otorrhea	sense organs	0.1166	-1.495	1.728	0.822	0.142	1.12367	0.224249	5.62938	10	5541	10	2454	0.887196	0.952046	not_significant	0.0506387	0.0519806	2.8607	2.599	3.122	0.133	21.445	0	-0.0512	-0.058	-0.045	0.003	-15.782	0	TRUE
Otosclerosis	sense organs	-0.9012	-2.882	1.08	1.011	-0.892	0.406082	0.0560226	2.94468	10	5541	10	2454	0.372606	0.702655	not_significant	-0.391386	0.42875	2.8622	2.601	3.124	0.133	21.458	0	-0.0513	-0.058	-0.045	0.003	-15.789	0	TRUE
Ovarian cyst	genitourinary	-1.1192	-3.9	1.661	1.419	-0.789	0.326541	0.0202419	5.26457	10	5541	10	2454	0.430176	0.738143	not_significant	-0.486062	0.366354	2.8628	2.601	3.124	0.133	21.46	0	-0.0513	-0.058	-0.045	0.003	-15.793	0	TRUE
Pain and other symptoms associated with female genital organs	genitourinary	-0.5282	-2.558	1.501	1.035	-0.51	0.589665	0.0774595	4.48617	10	5541	10	2454	0.609947	0.83304	not_significant	-0.229394	0.214708	2.8602	2.599	3.122	0.133	21.444	0	-0.0512	-0.058	-0.045	0.003	-15.774	0	TRUE
Pain in joint	musculoskeletal	0.2844	0.139	0.43	0.074	3.826	1.32896	1.14912	1.53726	811	4740	292	2172	0.000130319	0.00529798	mi_significant	0.123513	3.88499	2.8429	2.581	3.105	0.134	21.279	0	-0.0517	-0.058	-0.045	0.003	-15.894	0	TRUE
Pain in limb	symptoms	0.1685	-0.005	0.342	0.088	1.905	1.18353	0.995012	1.40776	506	5045	204	2260	0.0567408	0.317328	not_significant	0.0731786	1.2461	2.858	2.596	3.12	0.133	21.419	0	-0.0515	-0.058	-0.045	0.003	-15.847	0	TRUE
Pain, swelling or discharge of eye	sense organs	0.3324	-0.245	0.91	0.295	1.128	1.39431	0.782705	2.48432	46	5505	16	2448	0.259319	0.616695	not_significant	0.144359	0.586165	2.8615	2.6	3.123	0.133	21.451	0	-0.0513	-0.058	-0.045	0.003	-15.801	0	TRUE
Painful respiration	respiratory	0.3846	-0.094	0.863	0.244	1.574	1.46903	0.910283	2.37026	68	5483	24	2440	0.115436	0.433	not_significant	0.16703	0.937658	2.8659	2.604	3.127	0.133	21.471	0	-0.0515	-0.058	-0.045	0.003	-15.83	0	TRUE
Palpitations	circulatory system	-0.1463	-0.424	0.131	0.142	-1.034	0.863898	0.654424	1.13997	153	5398	82	2382	0.301229	0.65799	not_significant	-0.0635373	0.521103	2.8628	2.601	3.124	0.133	21.461	0	-0.0512	-0.058	-0.045	0.003	-15.761	0	TRUE
Pancreatic cancer	neoplasms	1.6485	-0.471	3.768	1.081	1.524	5.19918	0.624378	43.2934	10	5541	10	2454	0.127414	0.444612	not_significant	0.715934	0.894782	2.8671	2.605	3.129	0.133	21.477	0	-0.0514	-0.058	-0.045	0.003	-15.824	0	TRUE
Pancytopenia	hematopoietic	-4.084e-05	-1.067	1.067	0.544	-7.5e-05	0.999959	0.344039	2.90665	12	5539	10	2454	0.99994	0.99994	not_significant	-1.77366e-05	2.59998e-05	2.8611	2.6	3.123	0.133	21.45	0	-0.0512	-0.058	-0.045	0.003	-15.785	0	TRUE
Panniculitis	musculoskeletal	-0.4784	-3.262	2.305	1.42	-0.337	0.619774	0.0383117	10.0242	10	5541	10	2454	0.736245	0.904197	not_significant	-0.207766	0.132978	2.8606	2.599	3.122	0.133	21.448	0	-0.0512	-0.058	-0.045	0.003	-15.779	0	TRUE
Paralysis/spasm of vocal cords or larynx	respiratory	0.7533	-1.411	2.917	1.104	0.682	2.124	0.243899	18.4857	10	5541	10	2454	0.495053	0.772508	not_significant	0.327154	0.305348	2.8603	2.599	3.122	0.133	21.445	0	-0.0512	-0.058	-0.045	0.003	-15.783	0	TRUE
Paralytic ileus	digestive	0.7413	-0.35	1.833	0.557	1.331	2.09866	0.704688	6.25262	19	5532	10	2454	0.183067	0.516005	not_significant	0.321942	0.73739	2.8594	2.598	3.121	0.133	21.434	0	-0.0512	-0.058	-0.045	0.003	-15.782	0	TRUE
Paralytic strabismus	sense organs	0.6859	-0.916	2.287	0.817	0.839	1.98556	0.400116	9.84536	10	5541	10	2454	0.401282	0.717068	not_significant	0.297883	0.396551	2.8629	2.601	3.124	0.133	21.459	0	-0.0513	-0.058	-0.045	0.003	-15.798	0	TRUE
Paranoid disorders	mental disorders	0.5832	-1.719	2.885	1.175	0.496	1.79176	0.179245	17.9036	10	5541	10	2454	0.619549	0.836351	not_significant	0.253281	0.207925	2.8612	2.6	3.123	0.133	21.448	0	-0.0513	-0.058	-0.045	0.003	-15.785	0	TRUE
Paraproteinemia	endocrine/metabolic	0.7826	-0.939	2.504	0.879	0.891	2.18715	0.391019	12.2313	10	5541	10	2454	0.373028	0.702655	not_significant	0.339879	0.428259	2.8664	2.605	3.128	0.133	21.472	0	-0.0514	-0.058	-0.045	0.003	-15.812	0	TRUE
Parasomnia	neurological	-0.4499	-1.216	0.316	0.391	-1.151	0.637692	0.296413	1.37163	16	5535	12	2452	0.249877	0.605779	not_significant	-0.195389	0.602274	2.861	2.6	3.122	0.133	21.45	0	-0.0512	-0.058	-0.045	0.003	-15.77	0	TRUE
Parkinson's disease	neurological	-1.5789	-3.878	0.72	1.173	-1.346	0.206202	0.0206922	2.05443	10	5541	10	2454	0.178317	0.510788	not_significant	-0.685708	0.748808	2.8582	2.597	3.12	0.133	21.425	0	-0.0512	-0.058	-0.045	0.003	-15.751	0	TRUE
Paroxysmal supraventricular tachycardia	circulatory system	0.7234	0.086	1.361	0.325	2.225	2.06143	1.08981	3.90009	45	5506	13	2451	0.0260731	0.190662	not_significant	0.314169	1.58381	2.8754	2.613	3.137	0.134	21.514	0	-0.0517	-0.058	-0.045	0.003	-15.884	0	TRUE
Paroxysmal ventricular tachycardia	circulatory system	0.5936	-0.254	1.442	0.433	1.372	1.81049	0.775692	4.22915	21	5530	10	2454	0.170099	0.499431	not_significant	0.257797	0.769297	2.8716	2.61	3.134	0.134	21.487	0	-0.0516	-0.058	-0.045	0.003	-15.838	0	TRUE
Partial epilepsy	neurological	1.3024	-0.232	2.836	0.783	1.664	3.67811	0.792946	17.0474	13	5538	10	2454	0.0960858	0.412857	not_significant	0.565625	1.01734	2.8652	2.604	3.127	0.133	21.471	0	-0.0514	-0.058	-0.045	0.003	-15.82	0	TRUE
Pathological, developmental or recurrent dislocation	musculoskeletal	-0.1663	-1.533	1.201	0.697	-0.238	0.846792	0.215887	3.32344	10	5541	10	2454	0.811501	0.926303	not_significant	-0.0722232	0.0907108	2.8619	2.6	3.123	0.133	21.451	0	-0.0513	-0.058	-0.045	0.003	-15.787	0	TRUE
Perforation of tympanic membrane	sense organs	-0.302	-1.154	0.55	0.435	-0.695	0.739338	0.315373	1.73325	14	5537	10	2454	0.487214	0.767898	not_significant	-0.131157	0.31228	2.8612	2.6	3.123	0.133	21.452	0	-0.0512	-0.058	-0.045	0.003	-15.778	0	TRUE
Periapical abscess	digestive	0.3986	-1.007	1.804	0.717	0.556	1.48974	0.365313	6.07389	10	5541	10	2454	0.578333	0.827978	not_significant	0.17311	0.237822	2.8621	2.601	3.124	0.133	21.458	0	-0.0513	-0.058	-0.045	0.003	-15.794	0	TRUE
Pericarditis	circulatory system	0.1574	-0.891	1.206	0.535	0.294	1.17046	0.410245	3.3401	13	5538	10	2454	0.768567	0.914093	not_significant	0.068358	0.114319	2.8609	2.599	3.122	0.133	21.449	0	-0.0513	-0.058	-0.045	0.003	-15.786	0	TRUE
Peripheral autonomic neuropathy	neurological	-0.134	-2.537	2.269	1.226	-0.109	0.87459	0.0791034	9.66973	10	5541	10	2454	0.912972	0.962984	not_significant	-0.0581955	0.0395427	2.8612	2.6	3.123	0.133	21.452	0	-0.0512	-0.058	-0.045	0.003	-15.785	0	TRUE
Peripheral enthesopathies and allied syndromes	musculoskeletal	-0.188	-0.423	0.048	0.12	-1.565	0.828615	0.655079	1.04917	203	5348	119	2345	0.117698	0.437036	not_significant	-0.0816474	0.929233	2.8588	2.597	3.12	0.133	21.431	0	-0.051	-0.057	-0.045	0.003	-15.686	0	TRUE
Peripheral or central vertigo	sense organs	0.2356	-0.338	0.809	0.292	0.805	1.26567	0.713195	2.24566	43	5508	17	2447	0.420581	0.727584	not_significant	0.10232	0.376151	2.8621	2.601	3.124	0.133	21.457	0	-0.0513	-0.058	-0.045	0.003	-15.8	0	TRUE
Peripheral retinal degenerations	sense organs	0.4243	-0.313	1.162	0.376	1.127	1.52852	0.73125	3.19632	27	5524	10	2454	0.25963	0.616695	not_significant	0.184271	0.585645	2.8656	2.604	3.127	0.133	21.47	0	-0.0514	-0.058	-0.045	0.003	-15.815	0	TRUE
Peripheral vascular disease, unspecified	circulatory system	0.44	-0.606	1.486	0.534	0.824	1.55271	0.545529	4.41938	14	5537	10	2454	0.409812	0.723158	not_significant	0.19109	0.387415	2.8633	2.602	3.125	0.133	21.46	0	-0.0513	-0.058	-0.045	0.003	-15.8	0	TRUE
Peritonitis and retroperitoneal infections	digestive	0.5745	-0.427	1.576	0.511	1.124	1.77624	0.652464	4.83557	18	5533	10	2454	0.260857	0.618041	not_significant	0.249502	0.583598	2.8616	2.6	3.123	0.133	21.454	0	-0.0513	-0.058	-0.045	0.003	-15.798	0	TRUE
Personality disorders	mental disorders	-0.6577	-3.431	2.115	1.415	-0.465	0.518041	0.0323546	8.28959	10	5541	10	2454	0.642037	0.847069	not_significant	-0.285635	0.19244	2.8609	2.6	3.122	0.133	21.45	0	-0.0512	-0.058	-0.045	0.003	-15.782	0	TRUE
Persons with potential health hazards related to socioeconomic, psychosocial, and other circumstances		0.1772	-0.249	0.604	0.218	0.814	1.19387	0.77958	1.82942	77	5474	32	2432	0.415573	0.724853	not_significant	0.076957	0.381352	2.8622	2.601	3.124	0.133	21.459	0	-0.0513	-0.058	-0.045	0.003	-15.803	0	TRUE
Pervasive developmental disorders	mental disorders	-0.4564	-1.368	0.456	0.465	-0.981	0.63356	0.254616	1.57775	12	5539	10	2454	0.326728	0.67716	not_significant	-0.198212	0.485813	2.8631	2.602	3.125	0.133	21.463	0	-0.0513	-0.058	-0.045	0.003	-15.79	0	TRUE
Peyronie's disease	genitourinary	-0.3368	-1.55	0.876	0.619	-0.544	0.714052	0.212248	2.40128	10	5541	10	2454	0.586346	0.829869	not_significant	-0.14627	0.231846	2.8595	2.598	3.121	0.133	21.436	0	-0.0512	-0.058	-0.045	0.003	-15.763	0	TRUE
Phlebitis and thrombophlebitis	circulatory system	-0.0544	-1.468	1.359	0.721	-0.075	0.947053	0.230386	3.8923	10	5541	10	2454	0.939921	0.976456	not_significant	-0.0236256	0.0269085	2.8611	2.6	3.123	0.133	21.452	0	-0.0512	-0.058	-0.045	0.003	-15.785	0	TRUE
Phlebitis and thrombophlebitis of lower extremities	circulatory system	-0.0364	-1.784	1.711	0.892	-0.041	0.964255	0.167965	5.53449	10	5541	10	2454	0.967425	0.982774	not_significant	-0.0158083	0.0143827	2.8611	2.6	3.123	0.133	21.452	0	-0.0512	-0.058	-0.045	0.003	-15.785	0	TRUE
Phobia	mental disorders	-0.1502	-0.949	0.649	0.408	-0.368	0.860536	0.387128	1.91363	17	5534	10	2454	0.712548	0.891317	not_significant	-0.065231	0.147186	2.8606	2.599	3.122	0.133	21.448	0	-0.0512	-0.058	-0.045	0.003	-15.775	0	TRUE
Pigmentary iris degeneration	sense organs	-0.8627	-3.79	2.065	1.494	-0.578	0.422021	0.0225956	7.8853	10	5541	10	2454	0.563528	0.820353	not_significant	-0.374666	0.249085	2.8613	2.6	3.123	0.133	21.454	0	-0.0512	-0.058	-0.045	0.003	-15.786	0	TRUE
Pilonidal cyst	dermatologic	-0.1017	-1.467	1.263	0.696	-0.146	0.903301	0.230616	3.53601	10	5541	10	2454	0.883846	0.949415	not_significant	-0.0441677	0.0536236	2.8615	2.6	3.123	0.133	21.451	0	-0.0513	-0.058	-0.045	0.003	-15.786	0	TRUE
Pituitary hyperfunction	endocrine/metabolic	1.3722	-0.689	3.434	1.052	1.305	3.94402	0.502078	31.0004	10	5541	10	2454	0.192012	0.523083	not_significant	0.595939	0.716673	2.8576	2.596	3.119	0.133	21.425	0	-0.0512	-0.058	-0.045	0.003	-15.768	0	TRUE
Pituitary hypofunction	endocrine/metabolic	1.4802	-0.612	3.572	1.067	1.387	4.39382	0.542265	35.5877	10	5541	10	2454	0.165523	0.495632	not_significant	0.642843	0.781141	2.8636	2.602	3.125	0.133	21.463	0	-0.0513	-0.058	-0.045	0.003	-15.806	0	TRUE
Pityriasis	dermatologic	0.2954	-1.31	1.901	0.819	0.361	1.34366	0.26982	6.69258	10	5541	10	2454	0.718454	0.895215	not_significant	0.128291	0.143601	2.8608	2.599	3.122	0.133	21.45	0	-0.0512	-0.058	-0.045	0.003	-15.785	0	TRUE
Pleurisy; pleural effusion	respiratory	1.5651	0.528	2.602	0.529	2.959	4.78315	1.69554	13.4907	40	5511	10	2454	0.00308898	0.0472297	mi_significant	0.679714	2.51018	2.8611	2.599	3.123	0.134	21.428	0	-0.0514	-0.058	-0.045	0.003	-15.81	0	TRUE
Plica syndrome	musculoskeletal	-1.1535	-2.613	0.306	0.745	-1.549	0.31553	0.0733143	1.35798	10	5541	10	2454	0.121334	0.442241	not_significant	-0.500959	0.916018	2.8593	2.598	3.121	0.133	21.436	0	-0.0512	-0.058	-0.045	0.003	-15.759	0	TRUE
Pneumococcal pneumonia	respiratory	0.0513	-1.055	1.158	0.564	0.091	1.05264	0.348192	3.18356	10	5541	10	2454	0.927559	0.969763	not_significant	0.0222793	0.0326583	2.8612	2.6	3.123	0.133	21.452	0	-0.0513	-0.058	-0.045	0.003	-15.784	0	TRUE
Pneumonia	respiratory	0.4925	0.027	0.958	0.237	2.074	1.6364	1.02737	2.60648	80	5471	25	2439	0.0380759	0.246225	not_significant	0.21389	1.41935	2.8655	2.604	3.127	0.133	21.481	0	-0.0515	-0.058	-0.045	0.003	-15.852	0	TRUE
Pneumonitis due to inhalation of food or vomitus	respiratory	0.4983	-0.824	1.821	0.675	0.738	1.64592	0.438673	6.17803	10	5541	10	2454	0.460266	0.752383	not_significant	0.216409	0.336991	2.8616	2.6	3.123	0.133	21.452	0	-0.0513	-0.058	-0.045	0.003	-15.791	0	TRUE
Poisoning by agents primarily acting on the smooth and skeletal muscles and respiratory system	injuries & poisonings	0.0108	-2.404	2.425	1.232	0.009	1.01086	0.0903558	11.3022	10	5541	10	2454	0.993018	0.995845	not_significant	0.00469038	0.00304268	2.8611	2.6	3.123	0.133	21.452	0	-0.0512	-0.058	-0.045	0.003	-15.785	0	TRUE
Poisoning by agents primarily affecting the cardiovascular system	injuries & poisonings	-0.004	-1.423	1.415	0.724	-0.006	0.996008	0.24099	4.11649	10	5541	10	2454	0.995579	0.997467	not_significant	-0.00173718	0.00192411	2.8611	2.6	3.123	0.133	21.452	0	-0.0512	-0.058	-0.045	0.003	-15.784	0	TRUE
Poisoning by analgesics, antipyretics, and antirheumatics	injuries & poisonings	0.6334	-1.91	3.177	1.298	0.488	1.88401	0.14808	23.9747	10	5541	10	2454	0.625414	0.842118	not_significant	0.275082	0.203833	2.8635	2.602	3.125	0.133	21.451	0	-0.0513	-0.058	-0.045	0.003	-15.79	0	TRUE
Poisoning by other anti-infectives	injuries & poisonings	-0.3087	-2.588	1.97	1.163	-0.266	0.734401	0.0751702	7.17068	10	5541	10	2454	0.790597	0.916968	not_significant	-0.134067	0.102045	2.8623	2.601	3.124	0.133	21.448	0	-0.0513	-0.058	-0.045	0.003	-15.786	0	TRUE
Poisoning by psychotropic agents	injuries & poisonings	-0.4837	-2.496	1.528	1.027	-0.471	0.616498	0.082414	4.60895	10	5541	10	2454	0.637458	0.847069	not_significant	-0.210068	0.195548	2.8602	2.599	3.122	0.133	21.443	0	-0.0512	-0.058	-0.045	0.003	-15.773	0	TRUE
Polycythemia vera	neoplasms	-0.5825	-2.203	1.038	0.827	-0.704	0.5585	0.110471	2.82356	10	5541	10	2454	0.481164	0.767105	not_significant	-0.252977	0.317707	2.8601	2.599	3.122	0.133	21.443	0	-0.0512	-0.058	-0.045	0.003	-15.772	0	TRUE
Polycythemia, secondary	hematopoietic	0.627	-0.235	1.489	0.44	1.425	1.87199	0.790571	4.43266	23	5528	10	2454	0.154043	0.477488	not_significant	0.272303	0.812358	2.8664	2.605	3.128	0.133	21.475	0	-0.0514	-0.058	-0.045	0.003	-15.824	0	TRUE
Polydipsia	endocrine/metabolic	0.9692	-0.588	2.526	0.794	1.22	2.63583	0.555437	12.5034	10	5541	10	2454	0.22246	0.57062	not_significant	0.420918	0.652748	2.8645	2.603	3.126	0.133	21.465	0	-0.0514	-0.058	-0.045	0.003	-15.809	0	TRUE
Polymyalgia Rheumatica	musculoskeletal	0.1114	-2.93	3.153	1.552	0.072	1.11784	0.053397	23.4062	10	5541	10	2454	0.942792	0.976685	not_significant	0.0483804	0.0255843	2.8614	2.6	3.123	0.133	21.443	0	-0.0513	-0.058	-0.045	0.003	-15.778	0	TRUE
Polyneuropathy in diabetes	endocrine/metabolic	1.1663	-1.141	3.474	1.177	0.991	3.21009	0.319499	32.2655	10	5541	10	2454	0.321801	0.674707	not_significant	0.506518	0.492412	2.8677	2.606	3.129	0.134	21.472	0	-0.0514	-0.058	-0.045	0.003	-15.815	0	TRUE
Portal hypertension	digestive	0.8934	-0.443	2.23	0.682	1.311	2.44342	0.642107	9.29987	10	5541	10	2454	0.189976	0.522112	not_significant	0.387999	0.721301	2.8708	2.609	3.133	0.134	21.485	0	-0.0515	-0.058	-0.045	0.003	-15.834	0	TRUE
Postinflammatory pulmonary fibrosis	respiratory	-0.1208	-1.262	1.02	0.582	-0.207	0.886211	0.283087	2.77319	10	5541	10	2454	0.835645	0.930983	not_significant	-0.0524628	0.0779783	2.8606	2.599	3.122	0.133	21.446	0	-0.0512	-0.058	-0.045	0.003	-15.776	0	TRUE
Postlaminectomy syndrome	musculoskeletal	-0.4052	-1.844	1.033	0.734	-0.552	0.666843	0.158183	2.80948	10	5541	10	2454	0.580923	0.827978	not_significant	-0.175976	0.235882	2.8622	2.601	3.124	0.133	21.456	0	-0.0513	-0.058	-0.045	0.003	-15.789	0	TRUE
Postnasal drip	respiratory	0.3456	-0.16	0.852	0.258	1.339	1.41284	0.852144	2.34433	58	5493	22	2442	0.180594	0.513665	not_significant	0.150092	0.743297	2.8662	2.605	3.128	0.133	21.475	0	-0.0515	-0.058	-0.045	0.003	-15.827	0	TRUE
Postoperative infection	infectious diseases	1.3782	-0.687	3.443	1.054	1.308	3.96775	0.503083	31.2807	10	5541	10	2454	0.190901	0.522112	not_significant	0.598545	0.719191	2.858	2.597	3.119	0.133	21.425	0	-0.0512	-0.058	-0.045	0.003	-15.769	0	TRUE
Postprocedural fever	symptoms	0.285	-2.027	2.598	1.18	0.242	1.32976	0.13173	13.4368	10	5541	10	2454	0.80911	0.924572	not_significant	0.123774	0.0919924	2.861	2.6	3.122	0.133	21.45	0	-0.0512	-0.058	-0.045	0.003	-15.785	0	TRUE
Posttraumatic stress disorder	mental disorders	-0.3464	-1.148	0.455	0.409	-0.847	0.70723	0.317271	1.57617	16	5535	10	2454	0.39715	0.717068	not_significant	-0.15044	0.401045	2.8624	2.601	3.124	0.133	21.459	0	-0.0512	-0.058	-0.045	0.003	-15.786	0	TRUE
potential health hazards related to communicable diseases potential health hazards related to communicable diseases		1.3663	-0.712	3.445	1.06	1.289	3.92082	0.490662	31.3433	10	5541	10	2454	0.197539	0.527269	not_significant	0.593377	0.704347	2.8597	2.598	3.121	0.133	21.438	0	-0.0512	-0.058	-0.045	0.003	-15.781	0	TRUE
Precordial pain	circulatory system	0.3088	-0.389	1.006	0.356	0.868	1.36179	0.677734	2.73464	32	5519	11	2453	0.385619	0.712169	not_significant	0.13411	0.413841	2.8608	2.599	3.122	0.133	21.446	0	-0.0513	-0.058	-0.045	0.003	-15.791	0	TRUE
Premature beats	circulatory system	0.2247	-0.394	0.844	0.316	0.711	1.25195	0.674354	2.32565	33	5518	16	2448	0.476806	0.76415	not_significant	0.097586	0.321658	2.8656	2.604	3.127	0.134	21.459	0	-0.0514	-0.058	-0.045	0.003	-15.797	0	TRUE
Presbyopia	sense organs	0.347	-0.063	0.758	0.209	1.657	1.41482	0.938943	2.134	90	5461	32	2432	0.09751	0.415811	not_significant	0.1507	1.01095	2.8639	2.602	3.125	0.133	21.468	0	-0.0514	-0.058	-0.045	0.003	-15.832	0	TRUE
Primary hypercoagulable state	hematopoietic	0.7579	-0.769	2.285	0.779	0.973	2.13379	0.463476	9.82569	10	5541	10	2454	0.330596	0.680706	not_significant	0.329152	0.480703	2.8595	2.598	3.121	0.133	21.44	0	-0.0512	-0.058	-0.045	0.003	-15.781	0	TRUE
Primary open angle glaucoma	sense organs	0.6167	-1.02	2.253	0.835	0.739	1.8528	0.360595	9.51624	10	5541	10	2454	0.460106	0.752383	not_significant	0.267829	0.337142	2.8632	2.602	3.125	0.133	21.46	0	-0.0513	-0.058	-0.045	0.003	-15.798	0	TRUE
Primary thrombocytopenia	hematopoietic	0.0616	-1.054	1.178	0.569	0.108	1.06354	0.348541	3.24787	10	5541	10	2454	0.913787	0.962984	not_significant	0.0267525	0.0391549	2.8614	2.6	3.123	0.133	21.448	0	-0.0513	-0.058	-0.045	0.003	-15.781	0	TRUE
Primary/intrinsic cardiomyopathies	circulatory system	0.6211	-0.107	1.349	0.372	1.672	1.86097	0.898526	3.85357	33	5518	10	2454	0.0945451	0.407894	not_significant	0.26974	1.02436	2.8684	2.607	3.13	0.134	21.48	0	-0.0515	-0.058	-0.045	0.003	-15.837	0	TRUE
Progressive myopia	sense organs	1.3537	0.134	2.574	0.623	2.174	3.87172	1.14339	13.1182	23	5528	10	2454	0.0296754	0.205012	not_significant	0.587904	1.5276	2.8633	2.602	3.125	0.133	21.456	0	-0.0514	-0.058	-0.045	0.003	-15.816	0	TRUE
Prostatitis	genitourinary	0.3779	-0.666	1.421	0.532	0.71	1.45922	0.51376	4.14126	14	5537	10	2454	0.477865	0.76415	not_significant	0.16412	0.320695	2.8622	2.601	3.124	0.133	21.456	0	-0.0513	-0.058	-0.045	0.003	-15.795	0	TRUE
Protein-calorie malnutrition	endocrine/metabolic	0.0989	-0.796	0.994	0.457	0.217	1.10396	0.45113	2.70202	15	5536	10	2454	0.828542	0.930983	not_significant	0.0429517	0.0816855	2.862	2.6	3.124	0.133	21.448	0	-0.0513	-0.058	-0.045	0.003	-15.78	0	TRUE
Proteinuria	endocrine/metabolic	0.6461	0.026	1.266	0.316	2.042	1.90808	1.02634	3.54664	47	5504	14	2450	0.0411153	0.256419	not_significant	0.280598	1.386	2.8714	2.61	3.133	0.134	21.501	0	-0.0516	-0.058	-0.045	0.003	-15.866	0	TRUE
Prurigo and Lichen	dermatologic	0.6065	0.008	1.205	0.305	1.987	1.834	1.00803	3.33676	54	5497	14	2450	0.046893	0.281624	not_significant	0.2634	1.32889	2.8607	2.599	3.122	0.133	21.439	0	-0.0514	-0.058	-0.045	0.003	-15.807	0	TRUE
Pruritus and related conditions	dermatologic	0.3631	-0.009	0.735	0.19	1.913	1.43778	0.99104	2.08548	119	5432	39	2425	0.0557846	0.315317	not_significant	0.157692	1.25349	2.8597	2.598	3.121	0.133	21.43	0	-0.0514	-0.058	-0.045	0.003	-15.813	0	TRUE
Psoriasis vulgaris	dermatologic	0.6217	-0.01	1.253	0.322	1.93	1.86209	0.99005	3.50083	46	5505	13	2451	0.0535973	0.309576	not_significant	0.270001	1.27086	2.8661	2.605	3.128	0.133	21.478	0	-0.0515	-0.058	-0.045	0.003	-15.84	0	TRUE
Psoriatic arthropathy	dermatologic	-0.5401	-1.669	0.589	0.576	-0.938	0.58269	0.188435	1.80219	10	5541	10	2454	0.348383	0.695125	not_significant	-0.234562	0.457943	2.8608	2.599	3.122	0.133	21.443	0	-0.0512	-0.058	-0.045	0.003	-15.77	0	TRUE
Psychogenic disorder	mental disorders	0.2056	-0.694	1.106	0.459	0.448	1.22826	0.499574	3.02225	17	5534	10	2454	0.65433	0.855162	not_significant	0.0892909	0.184203	2.8616	2.6	3.123	0.133	21.453	0	-0.0513	-0.058	-0.045	0.003	-15.79	0	TRUE
Psychophysical visual disturbances	sense organs	0.4574	-2.041	2.956	1.275	0.359	1.57996	0.129899	19.2209	10	5541	10	2454	0.719732	0.895215	not_significant	0.198646	0.142829	2.8624	2.601	3.124	0.133	21.452	0	-0.0513	-0.058	-0.045	0.003	-15.787	0	TRUE
Psychosis	mental disorders	0.0529	-1.653	1.759	0.871	0.061	1.05432	0.191475	5.80663	10	5541	10	2454	0.951559	0.982224	not_significant	0.0229742	0.0215645	2.8611	2.6	3.122	0.133	21.451	0	-0.0512	-0.058	-0.045	0.003	-15.785	0	TRUE
Ptosis of eyelid	sense organs	0.2246	-0.803	1.252	0.524	0.428	1.25182	0.447983	3.49733	11	5540	10	2454	0.668462	0.863771	not_significant	0.0975425	0.174923	2.8636	2.602	3.125	0.134	21.447	0	-0.0513	-0.058	-0.045	0.003	-15.784	0	TRUE
Pulmonary collapse; interstitial and compensatory emphysema	respiratory	2.3465	0.911	3.782	0.732	3.205	10.4489	2.48681	43.9038	36	5515	10	2454	0.00135279	0.028598	mi_significant	1.01907	2.86877	2.8791	2.617	3.141	0.134	21.516	0	-0.0519	-0.058	-0.045	0.003	-15.914	0	TRUE
Pulmonary congestion and hypostasis	respiratory	0.8822	-0.669	2.433	0.791	1.115	2.41621	0.512221	11.393	10	5541	10	2454	0.264893	0.620824	not_significant	0.383135	0.57693	2.8617	2.6	3.123	0.133	21.447	0	-0.0513	-0.058	-0.045	0.003	-15.791	0	TRUE
Pulmonary embolism and infarction, acute	circulatory system	0.2097	-0.615	1.035	0.421	0.498	1.23331	0.540641	2.81511	22	5529	10	2454	0.618304	0.835738	not_significant	0.0910716	0.208798	2.8606	2.599	3.122	0.133	21.446	0	-0.0513	-0.058	-0.045	0.003	-15.785	0	TRUE
Purpura and other hemorrhagic conditions	hematopoietic	1.4019	-0.749	3.553	1.097	1.277	4.06291	0.472839	34.9179	10	5541	10	2454	0.201462	0.533699	not_significant	0.608837	0.695806	2.8662	2.605	3.128	0.133	21.472	0	-0.0514	-0.058	-0.045	0.003	-15.816	0	TRUE
Pyelonephritis	genitourinary	1.2139	-0.33	2.758	0.788	1.541	3.36659	0.718924	15.7683	11	5540	10	2454	0.123338	0.443431	not_significant	0.52719	0.908902	2.8668	2.605	3.129	0.134	21.474	0	-0.0514	-0.058	-0.045	0.003	-15.823	0	TRUE
Rash and other nonspecific skin eruption	dermatologic	0.1127	-0.134	0.359	0.126	0.897	1.1193	0.87459	1.4319	231	5320	98	2366	0.369552	0.702655	not_significant	0.048945	0.432324	2.8604	2.599	3.122	0.133	21.446	0	-0.0513	-0.058	-0.045	0.003	-15.805	0	TRUE
Raynaud's syndrome	circulatory system	-0.2825	-1.25	0.685	0.494	-0.572	0.753897	0.286505	1.98377	11	5540	10	2454	0.567155	0.820393	not_significant	-0.122688	0.246298	2.861	2.6	3.122	0.133	21.452	0	-0.0512	-0.058	-0.045	0.003	-15.779	0	TRUE
Redundant prepuce and phimosis/BXO	genitourinary	0.2337	-0.912	1.38	0.585	0.4	1.26327	0.40172	3.9749	12	5539	10	2454	0.689449	0.87561	not_significant	0.101495	0.161498	2.8603	2.599	3.122	0.133	21.444	0	-0.0512	-0.058	-0.045	0.003	-15.783	0	TRUE
Reflux esophagitis	digestive	0.1947	-0.4	0.79	0.304	0.642	1.21495	0.67032	2.2034	39	5512	16	2448	0.521168	0.797283	not_significant	0.0845571	0.283023	2.8618	2.6	3.123	0.133	21.455	0	-0.0513	-0.058	-0.045	0.003	-15.795	0	TRUE
Regional enteritis	digestive	0.2427	-0.626	1.112	0.443	0.547	1.27469	0.534726	3.04043	20	5531	10	2454	0.584111	0.829869	not_significant	0.105403	0.233505	2.8603	2.599	3.122	0.133	21.445	0	-0.0512	-0.058	-0.045	0.003	-15.785	0	TRUE
Renal colic	genitourinary	0.1427	-0.832	1.117	0.497	0.287	1.15338	0.435178	3.05567	14	5537	10	2454	0.774134	0.914257	not_significant	0.0619738	0.111184	2.8613	2.6	3.123	0.133	21.452	0	-0.0513	-0.058	-0.045	0.003	-15.787	0	TRUE
Respiratory abnormalities	respiratory	-0.4519	-1.726	0.822	0.65	-0.695	0.636418	0.177995	2.27505	10	5541	10	2454	0.486826	0.767898	not_significant	-0.196258	0.312627	2.8622	2.601	3.124	0.133	21.457	0	-0.0513	-0.058	-0.045	0.003	-15.788	0	TRUE
Respiratory complications	respiratory	-0.8246	-2.792	1.143	1.004	-0.821	0.43841	0.0612985	3.13616	10	5541	10	2454	0.411468	0.724823	not_significant	-0.358119	0.385663	2.8618	2.6	3.123	0.133	21.455	0	-0.0513	-0.058	-0.045	0.003	-15.786	0	TRUE
Respiratory failure	respiratory	0.4483	-0.375	1.271	0.42	1.067	1.56565	0.687289	3.56442	24	5527	10	2454	0.285758	0.642855	not_significant	0.194694	0.544001	2.8632	2.602	3.125	0.133	21.46	0	-0.0513	-0.058	-0.045	0.003	-15.805	0	TRUE
Respiratory insufficiency	respiratory	0.3057	-1.962	2.574	1.157	0.264	1.35757	0.140577	13.1182	10	5541	10	2454	0.791652	0.916968	not_significant	0.132764	0.101466	2.861	2.6	3.122	0.133	21.451	0	-0.0512	-0.058	-0.045	0.003	-15.786	0	TRUE
Restless legs syndrome	neurological	-0.0611	-0.725	0.603	0.339	-0.18	0.940729	0.484325	1.82759	26	5525	14	2450	0.856864	0.938554	not_significant	-0.0265354	0.0670883	2.8608	2.599	3.122	0.133	21.449	0	-0.0512	-0.058	-0.045	0.003	-15.776	0	TRUE
Retention of urine	genitourinary	1.2805	0.625	1.936	0.334	3.83	3.59844	1.86825	6.93097	65	5486	11	2453	0.000128081	0.00529798	mi_significant	0.556114	3.89251	2.8931	2.63	3.156	0.134	21.585	0	-0.0523	-0.059	-0.046	0.003	-16.006	0	TRUE
Reticulosarcoma	neoplasms	1.3706	-0.726	3.468	1.07	1.281	3.93771	0.48384	32.0725	10	5541	10	2454	0.200155	0.531599	not_significant	0.595244	0.698633	2.8616	2.6	3.123	0.133	21.451	0	-0.0513	-0.058	-0.045	0.003	-15.794	0	TRUE
Retinal detachment with retinal defect	sense organs	0.5376	-1.215	2.29	0.894	0.601	1.71189	0.29671	9.87494	10	5541	10	2454	0.547701	0.809679	not_significant	0.233477	0.261456	2.8645	2.603	3.126	0.134	21.455	0	-0.0513	-0.058	-0.045	0.003	-15.794	0	TRUE
Retinal detachments and defects	sense organs	1.1371	0.232	2.042	0.462	2.464	3.11771	1.26112	7.70601	28	5523	10	2454	0.013756	0.129822	not_significant	0.493836	1.86151	2.8802	2.618	3.142	0.134	21.535	0	-0.0518	-0.058	-0.045	0.003	-15.907	0	TRUE
Retinal edema	sense organs	-0.299	-2.288	1.69	1.015	-0.295	0.741559	0.101469	5.41948	10	5541	10	2454	0.7683	0.914093	not_significant	-0.129854	0.114469	2.8601	2.599	3.122	0.133	21.438	0	-0.0512	-0.058	-0.045	0.003	-15.769	0	TRUE
Retinal hemorrhage/ischemia	sense organs	0.9084	-0.644	2.461	0.792	1.147	2.48035	0.525187	11.7165	10	5541	10	2454	0.25155	0.605922	not_significant	0.394513	0.599375	2.8634	2.602	3.125	0.133	21.461	0	-0.0513	-0.058	-0.045	0.003	-15.803	0	TRUE
Retinal vascular changes and abnomalities	sense organs	1.8556	0.343	3.368	0.772	2.405	6.39553	1.40917	29.0204	15	5536	10	2454	0.016173	0.144871	not_significant	0.805877	1.79121	2.8862	2.624	3.149	0.134	21.548	0	-0.0519	-0.058	-0.046	0.003	-15.924	0	TRUE
Retinoschisis and retinal cysts	sense organs	0.4701	-1.828	2.768	1.172	0.401	1.60015	0.160735	15.9267	10	5541	10	2454	0.688437	0.87561	not_significant	0.204162	0.162136	2.8615	2.6	3.123	0.133	21.453	0	-0.0513	-0.058	-0.045	0.003	-15.788	0	TRUE
Rhabdomyolysis	symptoms	-0.0668	-1.718	1.584	0.842	-0.079	0.935382	0.179425	4.87441	10	5541	10	2454	0.936799	0.976448	not_significant	-0.0290109	0.0283536	2.8613	2.6	3.123	0.133	21.45	0	-0.0512	-0.058	-0.045	0.003	-15.785	0	TRUE
Rheumatoid arthritis	musculoskeletal	0.485	-0.834	1.804	0.673	0.721	1.62418	0.434309	6.07389	10	5541	10	2454	0.471207	0.761159	not_significant	0.210633	0.326788	2.8614	2.6	3.123	0.133	21.451	0	-0.0513	-0.058	-0.045	0.003	-15.79	0	TRUE
Rheumatoid arthritis and other inflammatory polyarthropathies	musculoskeletal	1.8807	-0.24	4.002	1.082	1.738	6.55809	0.786628	54.7075	10	5541	10	2454	0.0822062	0.387911	not_significant	0.816778	1.0851	2.8683	2.607	3.13	0.134	21.483	0	-0.0515	-0.058	-0.045	0.003	-15.835	0	TRUE
Right bundle branch block	circulatory system	1.1147	0.149	2.08	0.493	2.263	3.04865	1.16067	8.00447	29	5522	10	2454	0.0236438	0.179795	not_significant	0.484108	1.62628	2.8662	2.605	3.128	0.134	21.468	0	-0.0515	-0.058	-0.045	0.003	-15.832	0	TRUE
Rosacea	dermatologic	-0.2091	-0.757	0.339	0.28	-0.748	0.811314	0.469072	1.40354	35	5516	22	2442	0.454684	0.752115	not_significant	-0.090811	0.34229	2.8595	2.598	3.121	0.133	21.44	0	-0.0512	-0.058	-0.045	0.003	-15.754	0	TRUE
Rotator cuff (capsule) sprain		0.3111	-1.4	2.022	0.873	0.356	1.36493	0.246597	7.55342	10	5541	10	2454	0.721611	0.896066	not_significant	0.135109	0.141697	2.8623	2.601	3.124	0.133	21.453	0	-0.0513	-0.058	-0.045	0.003	-15.788	0	TRUE
Rupture of synovium	musculoskeletal	-0.1332	-1	0.734	0.442	-0.301	0.87529	0.367879	2.0834	14	5537	10	2454	0.763262	0.914093	not_significant	-0.057848	0.117326	2.8603	2.599	3.122	0.133	21.44	0	-0.0512	-0.058	-0.045	0.003	-15.767	0	TRUE
Rupture of tendon, nontraumatic	musculoskeletal	-0.3021	-0.968	0.364	0.34	-0.889	0.739264	0.379842	1.43907	21	5530	16	2448	0.373986	0.702655	not_significant	-0.1312	0.427144	2.8576	2.596	3.119	0.133	21.418	0	-0.0511	-0.057	-0.045	0.003	-15.733	0	TRUE
Sarcoidosis	dermatologic	1.2631	-0.869	3.395	1.088	1.161	3.53637	0.419371	29.8147	10	5541	10	2454	0.245525	0.599841	not_significant	0.548557	0.609904	2.8637	2.602	3.125	0.133	21.465	0	-0.0513	-0.058	-0.045	0.003	-15.806	0	TRUE
Scar conditions and fibrosis of skin	dermatologic	0.2104	-0.167	0.588	0.192	1.093	1.23417	0.8462	1.80038	96	5455	41	2423	0.274331	0.630532	not_significant	0.0913756	0.561725	2.8657	2.604	3.127	0.133	21.47	0	-0.0515	-0.058	-0.045	0.003	-15.818	0	TRUE
Schmorl's nodes	musculoskeletal	-1.1449	-3.945	1.655	1.429	-0.801	0.318256	0.0193512	5.23308	10	5541	10	2454	0.422919	0.72887	not_significant	-0.497224	0.373743	2.8628	2.601	3.124	0.133	21.46	0	-0.0513	-0.058	-0.045	0.003	-15.794	0	TRUE
Sciatica	symptoms	0.121	-0.195	0.437	0.161	0.752	1.12862	0.822835	1.54806	133	5418	60	2404	0.452346	0.751572	not_significant	0.0525496	0.344529	2.8636	2.602	3.125	0.133	21.46	0	-0.0514	-0.058	-0.045	0.003	-15.8	0	TRUE
Scleritis and episcleritis	sense organs	0.7937	-0.749	2.337	0.787	1.008	2.21156	0.472839	10.3501	10	5541	10	2454	0.313306	0.664988	not_significant	0.3447	0.504032	2.8614	2.6	3.123	0.133	21.453	0	-0.0513	-0.058	-0.045	0.003	-15.793	0	TRUE
Sebaceous cyst	dermatologic	0.0723	-0.25	0.394	0.164	0.44	1.07498	0.778801	1.4829	130	5421	56	2408	0.659682	0.858724	not_significant	0.0313995	0.180666	2.8603	2.599	3.122	0.133	21.444	0	-0.0513	-0.058	-0.045	0.003	-15.79	0	TRUE
Seborrheic dermatitis	dermatologic	0.0954	-0.271	0.462	0.187	0.51	1.1001	0.762616	1.58725	103	5448	43	2421	0.610195	0.83304	not_significant	0.0414317	0.214531	2.8603	2.599	3.122	0.133	21.443	0	-0.0513	-0.058	-0.045	0.003	-15.789	0	TRUE
Seborrheic keratosis	dermatologic	-0.0362	-0.266	0.193	0.117	-0.309	0.964447	0.766439	1.21288	226	5325	125	2339	0.757131	0.914093	not_significant	-0.0157215	0.120829	2.8586	2.597	3.12	0.134	21.395	0	-0.0511	-0.058	-0.045	0.003	-15.671	0	TRUE
Second degree AV block	circulatory system	0.3655	-2.044	2.775	1.23	0.297	1.44123	0.12951	16.0386	10	5541	10	2454	0.766291	0.914093	not_significant	0.158735	0.115606	2.8619	2.6	3.123	0.133	21.453	0	-0.0513	-0.058	-0.045	0.003	-15.787	0	TRUE
Secondary diabetes mellitus	endocrine/metabolic	1.1327	0.133	2.132	0.51	2.221	3.10403	1.14225	8.43171	24	5527	10	2454	0.0263355	0.190662	not_significant	0.491925	1.57946	2.875	2.613	3.137	0.134	21.515	0	-0.0517	-0.058	-0.045	0.003	-15.88	0	TRUE
Secondary hypothyroidism	endocrine/metabolic	1.0614	-0.213	2.336	0.65	1.632	2.89041	0.808156	10.3398	14	5537	10	2454	0.102597	0.418707	not_significant	0.46096	0.988865	2.8679	2.606	3.13	0.133	21.484	0	-0.0515	-0.058	-0.045	0.003	-15.834	0	TRUE
Secondary malignancy of lymph nodes	neoplasms	1.0172	-0.218	2.253	0.63	1.614	2.76544	0.804125	9.51624	18	5533	10	2454	0.106608	0.42469	not_significant	0.441764	0.972212	2.8603	2.599	3.122	0.133	21.438	0	-0.0513	-0.058	-0.045	0.003	-15.789	0	TRUE
Secondary malignancy of respiratory organs	neoplasms	1.1281	-1.097	3.353	1.135	0.994	3.08978	0.333871	28.5884	10	5541	10	2454	0.320359	0.673199	not_significant	0.489928	0.494363	2.8622	2.601	3.124	0.133	21.451	0	-0.0513	-0.058	-0.045	0.003	-15.792	0	TRUE
Secondary malignant neoplasm of liver	neoplasms	1.6113	-0.45	3.672	1.052	1.532	5.00932	0.637628	39.3305	10	5541	10	2454	0.125472	0.443715	not_significant	0.699779	0.901455	2.8619	2.6	3.123	0.133	21.456	0	-0.0513	-0.058	-0.045	0.003	-15.801	0	TRUE
Secondary thrombocytopenia	hematopoietic	0.3086	-0.865	1.483	0.599	0.515	1.36152	0.421052	4.40614	11	5540	10	2454	0.606404	0.830271	not_significant	0.134023	0.217238	2.8616	2.6	3.123	0.133	21.452	0	-0.0513	-0.058	-0.045	0.003	-15.789	0	TRUE
Secondary/extrinsic cardiomyopathies	circulatory system	0.8331	-0.753	2.419	0.809	1.03	2.30044	0.470952	11.2346	10	5541	10	2454	0.303103	0.660577	not_significant	0.361811	0.51841	2.8627	2.601	3.124	0.133	21.451	0	-0.0513	-0.058	-0.045	0.003	-15.793	0	TRUE
Senile cataract	sense organs	0.8934	0.464	1.323	0.219	4.076	2.44342	1.59042	3.75467	100	5451	29	2435	4.58982e-05	0.0022052	mi_significant	0.387999	4.3382	2.93	2.666	3.194	0.135	21.719	0	-0.0533	-0.06	-0.047	0.003	-16.176	0	TRUE
Sensorineural hearing loss	sense organs	0.0939	-0.261	0.449	0.181	0.518	1.09845	0.770281	1.56674	98	5453	49	2415	0.604152	0.830271	not_significant	0.0407803	0.218854	2.8645	2.603	3.126	0.134	21.448	0	-0.0514	-0.058	-0.045	0.003	-15.776	0	TRUE
Separation of retinal layers	sense organs	0.4471	-0.694	1.588	0.582	0.768	1.56377	0.499574	4.89395	13	5538	10	2454	0.44245	0.744896	not_significant	0.194173	0.354136	2.8612	2.6	3.123	0.133	21.451	0	-0.0513	-0.058	-0.045	0.003	-15.791	0	TRUE
Sepsis	injuries & poisonings	1.3346	0.362	2.308	0.496	2.688	3.79848	1.4362	10.0543	32	5519	10	2454	0.00718151	0.0834421	not_significant	0.579609	2.14378	2.875	2.613	3.137	0.134	21.508	0	-0.0517	-0.058	-0.045	0.003	-15.885	0	TRUE
Septal Deviations/Turbinate Hypertrophy	respiratory	0.0242	-0.325	0.374	0.178	0.136	1.0245	0.722527	1.45354	108	5443	48	2416	0.892035	0.955196	not_significant	0.0105099	0.0496179	2.8608	2.599	3.122	0.133	21.447	0	-0.0513	-0.058	-0.045	0.003	-15.786	0	TRUE
Septic shock	injuries & poisonings	0.9559	-1.222	3.133	1.111	0.86	2.60101	0.29464	22.9427	10	5541	10	2454	0.38957	0.71365	not_significant	0.415142	0.409414	2.8618	2.6	3.123	0.133	21.455	0	-0.0513	-0.058	-0.045	0.003	-15.793	0	TRUE
Septicemia	infectious diseases	1.1054	0.2	2.011	0.462	2.393	3.02043	1.2214	7.47078	31	5520	10	2454	0.0167198	0.146056	not_significant	0.480069	1.77677	2.8724	2.611	3.134	0.134	21.5	0	-0.0516	-0.058	-0.045	0.003	-15.869	0	TRUE
severe protein-calorie malnutrition	endocrine/metabolic	0.7846	-0.212	1.781	0.508	1.543	2.19153	0.808965	5.93579	20	5531	10	2454	0.122773	0.443431	not_significant	0.340747	0.910899	2.8654	2.604	3.127	0.133	21.468	0	-0.0514	-0.058	-0.045	0.003	-15.819	0	TRUE
Sexual and gender identity disorders	mental disorders	0.1128	-0.686	0.912	0.408	0.277	1.11941	0.503586	2.4893	21	5530	10	2454	0.782045	0.916968	not_significant	0.0489884	0.106768	2.8611	2.6	3.122	0.133	21.452	0	-0.0513	-0.058	-0.045	0.003	-15.788	0	TRUE
Sexually transmitted infections (not HIV or hepatitis)	infectious diseases	0.4099	-0.456	1.276	0.442	0.928	1.50667	0.633814	3.58228	22	5529	10	2454	0.353417	0.696113	not_significant	0.178017	0.451713	2.8613	2.6	3.123	0.133	21.449	0	-0.0513	-0.058	-0.045	0.003	-15.793	0	TRUE
Shock	symptoms	0.7247	-1.477	2.926	1.123	0.645	2.06411	0.228322	18.6529	10	5541	10	2454	0.518826	0.797283	not_significant	0.314733	0.284978	2.8615	2.6	3.123	0.133	21.454	0	-0.0513	-0.058	-0.045	0.003	-15.79	0	TRUE
Shortness of breath	respiratory	0.3424	0.071	0.614	0.139	2.47	1.40832	1.07358	1.84781	216	5335	77	2387	0.013509	0.12864	not_significant	0.148702	1.86938	2.8673	2.606	3.129	0.134	21.478	0	-0.0517	-0.058	-0.045	0.003	-15.886	0	TRUE
Sialoadenitis	digestive	0.8394	-0.262	1.941	0.562	1.494	2.31498	0.769511	6.96571	17	5534	10	2454	0.135278	0.450132	not_significant	0.364547	0.868772	2.8644	2.603	3.126	0.133	21.469	0	-0.0514	-0.058	-0.045	0.003	-15.817	0	TRUE
Sicca syndrome	dermatologic	-0.7346	-3.513	2.043	1.417	-0.518	0.479697	0.0298074	7.71372	10	5541	10	2454	0.604251	0.830271	not_significant	-0.319033	0.218782	2.8611	2.6	3.123	0.133	21.452	0	-0.0512	-0.058	-0.045	0.003	-15.784	0	TRUE
Simple and unspecified goiter	endocrine/metabolic	0.2012	-1.167	1.57	0.698	0.288	1.22287	0.311299	4.80665	10	5541	10	2454	0.77325	0.914257	not_significant	0.08738	0.11168	2.8614	2.6	3.123	0.133	21.453	0	-0.0513	-0.058	-0.045	0.003	-15.787	0	TRUE
Sinoatrial node dysfunction (Bradycardia)	circulatory system	0.8094	-0.875	2.494	0.86	0.942	2.24656	0.416862	12.1096	10	5541	10	2454	0.346355	0.694681	not_significant	0.351518	0.460479	2.8656	2.604	3.127	0.133	21.47	0	-0.0514	-0.058	-0.045	0.003	-15.811	0	TRUE
Skull and face fracture and other intercranial injury	injuries & poisonings	0.3358	-0.697	1.368	0.527	0.637	1.39906	0.498077	3.92749	15	5536	10	2454	0.523891	0.797914	not_significant	0.145836	0.280759	2.8608	2.599	3.122	0.133	21.449	0	-0.0513	-0.058	-0.045	0.003	-15.788	0	TRUE
Sleep apnea	neurological	0.1532	-0.107	0.414	0.133	1.152	1.16556	0.898526	1.51286	204	5347	87	2377	0.249328	0.605779	not_significant	0.0665339	0.603229	2.8635	2.602	3.125	0.133	21.464	0	-0.0514	-0.058	-0.045	0.003	-15.821	0	TRUE
Sleep disorders	neurological	0.196	-0.181	0.573	0.193	1.018	1.21653	0.834435	1.77358	99	5452	40	2424	0.308797	0.664976	not_significant	0.0851217	0.510326	2.8623	2.601	3.124	0.133	21.456	0	-0.0514	-0.058	-0.045	0.003	-15.807	0	TRUE
Sleep related movement disorders	neurological	0.3178	-0.872	1.507	0.607	0.524	1.3741	0.418114	4.51317	10	5541	10	2454	0.600548	0.830271	not_significant	0.138019	0.221452	2.8622	2.601	3.124	0.133	21.456	0	-0.0513	-0.058	-0.045	0.003	-15.792	0	TRUE
Solitary pulmonary nodule	respiratory	0.8899	0.31	1.469	0.296	3.01	2.43489	1.36343	4.34489	62	5489	15	2449	0.00261356	0.0425005	mi_significant	0.386479	2.58277	2.8813	2.619	3.143	0.134	21.553	0	-0.0519	-0.058	-0.046	0.003	-15.943	0	TRUE
Somatoform disorder	mental disorders	-0.0032	-1.782	1.775	0.907	-0.004	0.996805	0.168301	5.90028	10	5541	10	2454	0.997152	0.998097	not_significant	-0.00138974	0.00123843	2.8611	2.6	3.123	0.133	21.452	0	-0.0512	-0.058	-0.045	0.003	-15.784	0	TRUE
Spasm of muscle	symptoms	0.4305	-0.131	0.992	0.286	1.503	1.53803	0.877218	2.69662	53	5498	17	2447	0.13283	0.448565	not_significant	0.186964	0.876705	2.8626	2.601	3.124	0.133	21.456	0	-0.0514	-0.058	-0.045	0.003	-15.813	0	TRUE
Specific nonpsychotic mental disorders due to brain damage	mental disorders	0.4141	-0.738	1.566	0.588	0.705	1.51301	0.478069	4.78746	14	5537	10	2454	0.48106	0.767105	not_significant	0.179841	0.3178	2.8604	2.599	3.122	0.133	21.441	0	-0.0512	-0.058	-0.045	0.003	-15.783	0	TRUE
Spermatocele	genitourinary	-0.2537	-0.986	0.478	0.374	-0.679	0.775925	0.373066	1.61285	20	5531	12	2452	0.496978	0.773375	not_significant	-0.110181	0.303662	2.8615	2.6	3.123	0.133	21.453	0	-0.0512	-0.058	-0.045	0.003	-15.779	0	TRUE
Spinal stenosis	musculoskeletal	0.308	-0.194	0.81	0.256	1.203	1.3607	0.823658	2.24791	56	5495	23	2441	0.228852	0.577318	not_significant	0.133763	0.640446	2.8673	2.606	3.129	0.134	21.478	0	-0.0515	-0.058	-0.045	0.003	-15.826	0	TRUE
Spinal stenosis of lumbar region	musculoskeletal	0.01	-0.45	0.47	0.235	0.043	1.01005	0.637628	1.59999	56	5495	30	2434	0.965962	0.982774	not_significant	0.00434294	0.0150398	2.8613	2.6	3.123	0.133	21.442	0	-0.0513	-0.058	-0.045	0.003	-15.765	0	TRUE
Splenomegaly	digestive	0.4174	-0.496	1.33	0.466	0.896	1.51801	0.608962	3.78104	18	5533	10	2454	0.370176	0.702655	not_significant	0.181275	0.431592	2.8645	2.603	3.126	0.133	21.468	0	-0.0514	-0.058	-0.045	0.003	-15.809	0	TRUE
Spondylolisthesis, congenital	congenital anomalies	-0.9397	-3.778	1.899	1.448	-0.649	0.390745	0.0228684	6.67921	10	5541	10	2454	0.516424	0.796877	not_significant	-0.408107	0.286993	2.8617	2.6	3.123	0.133	21.456	0	-0.0513	-0.058	-0.045	0.003	-15.788	0	TRUE
Spondylosis with myelopathy	musculoskeletal	1.6934	-0.412	3.799	1.074	1.577	5.43794	0.662324	44.6565	10	5541	10	2454	0.114901	0.433	not_significant	0.735434	0.939676	2.8664	2.605	3.128	0.134	21.468	0	-0.0514	-0.058	-0.045	0.003	-15.818	0	TRUE
Spondylosis without myelopathy	musculoskeletal	0.2781	-0.07	0.626	0.177	1.567	1.32062	0.932394	1.87012	117	5434	48	2416	0.1172	0.437036	not_significant	0.120777	0.931073	2.8702	2.608	3.132	0.134	21.491	0	-0.0516	-0.058	-0.045	0.003	-15.851	0	TRUE
Spontaneous ecchymoses	hematopoietic	0.3451	-1.288	1.978	0.833	0.414	1.41213	0.275822	7.22827	10	5541	10	2454	0.678753	0.869261	not_significant	0.149875	0.168288	2.8611	2.6	3.122	0.133	21.451	0	-0.0513	-0.058	-0.045	0.003	-15.787	0	TRUE
Sprains and strains	injuries & poisonings	-0.0836	-0.295	0.128	0.108	-0.776	0.919799	0.744532	1.13655	278	5273	142	2322	0.437946	0.741841	not_significant	-0.036307	0.358579	2.862	2.601	3.123	0.133	21.457	0	-0.0512	-0.058	-0.045	0.003	-15.748	0	TRUE
Sprains and strains of back and neck		1.0278	0.143	1.913	0.452	2.276	2.79491	1.15373	6.77338	35	5516	10	2454	0.0228491	0.178054	not_significant	0.446368	1.64113	2.8621	2.6	3.124	0.134	21.434	0	-0.0514	-0.058	-0.045	0.003	-15.803	0	TRUE
Squamous cell carcinoma	neoplasms	0.045	-0.812	0.902	0.437	0.103	1.04603	0.443969	2.46453	14	5537	10	2454	0.918027	0.963609	not_significant	0.0195433	0.0371448	2.8618	2.6	3.123	0.134	21.431	0	-0.0513	-0.058	-0.045	0.003	-15.763	0	TRUE
Staphylococcus infections	infectious diseases	-0.1712	-1.282	0.94	0.567	-0.302	0.842653	0.277482	2.55998	10	5541	10	2454	0.762758	0.914093	not_significant	-0.0743512	0.117613	2.8612	2.6	3.123	0.133	21.453	0	-0.0512	-0.058	-0.045	0.003	-15.783	0	TRUE
Stiffness of joint	musculoskeletal	0.205	-0.344	0.754	0.28	0.731	1.22753	0.708929	2.12548	45	5506	19	2445	0.464495	0.756504	not_significant	0.0890304	0.333019	2.8628	2.601	3.124	0.133	21.46	0	-0.0513	-0.058	-0.045	0.003	-15.8	0	TRUE
Stomatitis and mucositis	digestive	0.644	-0.912	2.2	0.794	0.811	1.90408	0.40172	9.02501	10	5541	10	2454	0.417385	0.725619	not_significant	0.279686	0.379463	2.8599	2.599	3.121	0.133	21.441	0	-0.0512	-0.058	-0.045	0.003	-15.781	0	TRUE
Stomatitis and mucositis (ulcerative)	digestive	0.5123	-1.054	2.078	0.799	0.641	1.66913	0.348541	7.98848	10	5541	10	2454	0.521441	0.797283	not_significant	0.222489	0.282795	2.8601	2.599	3.122	0.133	21.443	0	-0.0512	-0.058	-0.045	0.003	-15.781	0	TRUE
Strabismus (not specified as paralytic)	sense organs	1.2081	-0.048	2.464	0.641	1.886	3.34712	0.953134	11.7517	17	5534	10	2454	0.0593403	0.324988	not_significant	0.524671	1.22665	2.8689	2.607	3.131	0.134	21.478	0	-0.0515	-0.058	-0.045	0.003	-15.835	0	TRUE
Strabismus and other disorders of binocular eye movements	sense organs	0.5103	-0.834	1.855	0.686	0.744	1.66579	0.434309	6.3917	10	5541	10	2454	0.456941	0.752383	not_significant	0.22162	0.34014	2.8626	2.601	3.124	0.133	21.458	0	-0.0513	-0.058	-0.045	0.003	-15.797	0	TRUE
Streptococcus infection	infectious diseases	-0.1337	-1.409	1.142	0.651	-0.205	0.874852	0.244388	3.13303	10	5541	10	2454	0.837199	0.930983	not_significant	-0.0580652	0.0771714	2.861	2.6	3.122	0.133	21.451	0	-0.0512	-0.058	-0.045	0.003	-15.782	0	TRUE
Stress fracture	musculoskeletal	-0.5317	-1.722	0.659	0.608	-0.875	0.587605	0.178708	1.93286	10	5541	10	2454	0.381432	0.709813	not_significant	-0.230914	0.418583	2.8628	2.601	3.124	0.133	21.454	0	-0.0513	-0.058	-0.045	0.003	-15.786	0	TRUE
Stricture and stenosis of esophagus	digestive	0.0339	-0.918	0.986	0.486	0.07	1.03448	0.399317	2.68049	13	5538	10	2454	0.944345	0.976685	not_significant	0.0147226	0.0248695	2.8613	2.6	3.123	0.133	21.449	0	-0.0513	-0.058	-0.045	0.003	-15.78	0	TRUE
Stricture of artery	circulatory system	-0.4545	-2.299	1.39	0.941	-0.483	0.634765	0.100359	4.01485	10	5541	10	2454	0.62913	0.84382	not_significant	-0.197387	0.20126	2.8616	2.6	3.123	0.133	21.454	0	-0.0513	-0.058	-0.045	0.003	-15.786	0	TRUE
Stricture/obstruction of ureter	genitourinary	1.0895	0.258	1.921	0.424	2.57	2.97279	1.29434	6.82778	25	5526	10	2454	0.0101845	0.10351	not_significant	0.473164	1.99206	2.9013	2.638	3.165	0.134	21.583	0	-0.0524	-0.059	-0.046	0.003	-15.977	0	TRUE
Subarachnoid hemorrhage	circulatory system	-0.2008	-2.606	2.204	1.227	-0.164	0.818076	0.0738293	9.06119	10	5541	10	2454	0.870006	0.943928	not_significant	-0.0872063	0.0604779	2.8613	2.6	3.123	0.133	21.452	0	-0.0512	-0.058	-0.045	0.003	-15.786	0	TRUE
Subjective visual disturbances	sense organs	1.0432	-0.015	2.102	0.54	1.931	2.83829	0.985112	8.18252	27	5524	10	2454	0.0534477	0.309576	not_significant	0.453056	1.27207	2.8557	2.594	3.117	0.133	21.404	0	-0.0512	-0.058	-0.045	0.003	-15.763	0	TRUE
Substance addiction and disorders	mental disorders	-0.0169	-0.663	0.629	0.33	-0.051	0.983242	0.515303	1.87573	31	5520	14	2450	0.959113	0.982774	not_significant	-0.00733958	0.0181301	2.8612	2.6	3.123	0.133	21.451	0	-0.0512	-0.058	-0.045	0.003	-15.785	0	TRUE
Suicidal ideation	mental disorders	-0.7374	-1.79	0.315	0.537	-1.374	0.478356	0.16696	1.37026	10	5541	10	2454	0.16959	0.499323	not_significant	-0.320249	0.770599	2.8629	2.602	3.124	0.133	21.467	0	-0.0513	-0.058	-0.045	0.003	-15.791	0	TRUE
Suicide or self-inflicted injury	mental disorders	0.9495	-1.404	3.303	1.201	0.791	2.58442	0.245613	27.1941	10	5541	10	2454	0.42913	0.737546	not_significant	0.412363	0.367411	2.8649	2.603	3.127	0.133	21.463	0	-0.0514	-0.058	-0.045	0.003	-15.802	0	TRUE
Superficial cellulitis and abscess	dermatologic	0.3018	-0.169	0.773	0.24	1.256	1.35229	0.844509	2.16626	68	5483	25	2439	0.209011	0.548199	not_significant	0.13107	0.679832	2.8625	2.601	3.124	0.133	21.461	0	-0.0514	-0.058	-0.045	0.003	-15.815	0	TRUE
Superficial injury without mention of infection	injuries & poisonings	0.2287	-0.186	0.643	0.212	1.081	1.25696	0.830274	1.90218	87	5464	32	2432	0.279869	0.638647	not_significant	0.0993231	0.553045	2.8594	2.598	3.121	0.133	21.438	0	-0.0513	-0.058	-0.045	0.003	-15.795	0	TRUE
Superficial keratitis	sense organs	0.4668	-1.728	2.661	1.12	0.417	1.59488	0.177639	14.3106	10	5541	10	2454	0.676738	0.869261	not_significant	0.202729	0.169579	2.8604	2.599	3.122	0.133	21.446	0	-0.0512	-0.058	-0.045	0.003	-15.782	0	TRUE
Suppurative and unspecified otitis media	sense organs	-0.057	-0.479	0.366	0.216	-0.264	0.944594	0.619402	1.44196	71	5480	33	2431	0.791514	0.916968	not_significant	-0.0247548	0.101542	2.8619	2.6	3.123	0.133	21.453	0	-0.0512	-0.058	-0.045	0.003	-15.786	0	TRUE
Supraventricular premature beats	circulatory system	0.3556	-0.844	1.555	0.612	0.581	1.42704	0.429987	4.73509	10	5541	10	2454	0.561096	0.820302	not_significant	0.154435	0.250963	2.8634	2.602	3.125	0.133	21.458	0	-0.0513	-0.058	-0.045	0.003	-15.795	0	TRUE
Swelling of limb	symptoms	0.0207	-0.354	0.395	0.191	0.108	1.02092	0.701875	1.48438	88	5463	44	2420	0.913767	0.962984	not_significant	0.0089899	0.0391646	2.8614	2.6	3.123	0.133	21.449	0	-0.0513	-0.058	-0.045	0.003	-15.772	0	TRUE
Swelling, mass, or lump in head and neck [Space-occupying lesion, intracranial NOS]	mental disorders	0.6359	0.159	1.113	0.243	2.614	1.88872	1.17234	3.04348	82	5469	23	2441	0.00894246	0.0964509	not_significant	0.276168	2.04854	2.8715	2.61	3.133	0.134	21.492	0	-0.0517	-0.058	-0.045	0.003	-15.88	0	TRUE
Symbolic dysfunction	mental disorders	0.4429	-2	2.885	1.246	0.355	1.55722	0.135335	17.9036	10	5541	10	2454	0.722278	0.896066	not_significant	0.192349	0.141295	2.8623	2.601	3.124	0.133	21.453	0	-0.0513	-0.058	-0.045	0.003	-15.788	0	TRUE
Symptoms affecting skin	dermatologic	0.1922	-0.425	0.809	0.315	0.611	1.21191	0.65377	2.24566	37	5514	15	2449	0.541272	0.804753	not_significant	0.0834714	0.266584	2.8616	2.6	3.123	0.133	21.454	0	-0.0513	-0.058	-0.045	0.003	-15.794	0	TRUE
Symptoms and disorders of the joints	musculoskeletal	0.4028	-0.06	0.865	0.236	1.707	1.49601	0.941765	2.37501	74	5477	25	2439	0.0877923	0.398268	not_significant	0.174934	1.05654	2.8646	2.603	3.126	0.133	21.464	0	-0.0515	-0.058	-0.045	0.003	-15.828	0	TRUE
Symptoms involving cardiovascular system	circulatory system	0.2139	-0.236	0.663	0.229	0.932	1.2385	0.789781	1.94061	68	5483	29	2435	0.351084	0.696113	not_significant	0.0928956	0.454588	2.8647	2.603	3.126	0.133	21.465	0	-0.0514	-0.058	-0.045	0.003	-15.809	0	TRUE
Symptoms involving digestive system	digestive	0.2855	-0.151	0.722	0.223	1.281	1.33043	0.859848	2.05855	81	5470	29	2435	0.200167	0.531599	not_significant	0.123991	0.698607	2.8608	2.599	3.122	0.133	21.447	0	-0.0513	-0.058	-0.045	0.003	-15.806	0	TRUE
Symptoms involving head and neck	mental disorders	0.8574	-0.4	2.115	0.642	1.336	2.35702	0.67032	8.28959	15	5536	10	2454	0.181562	0.513665	not_significant	0.372364	0.740975	2.8609	2.599	3.122	0.133	21.446	0	-0.0513	-0.058	-0.045	0.003	-15.792	0	TRUE
Symptoms involving nervous and musculoskeletal systems	symptoms	0.3199	-0.586	1.226	0.462	0.692	1.37699	0.556549	3.40757	17	5534	10	2454	0.488927	0.767898	not_significant	0.138931	0.310756	2.8634	2.602	3.125	0.133	21.459	0	-0.0513	-0.058	-0.045	0.003	-15.798	0	TRUE
Symptoms involving respiratory system and other chest symptoms	respiratory	1.1038	0.272	1.936	0.425	2.6	3.0156	1.31259	6.93097	36	5515	10	2454	0.00932864	0.0995997	not_significant	0.479374	2.03018	2.875	2.613	3.137	0.134	21.509	0	-0.0517	-0.058	-0.045	0.003	-15.885	0	TRUE
Symptoms of the muscles	symptoms	0.6027	-0.159	1.365	0.389	1.551	1.82705	0.852996	3.91572	31	5520	10	2454	0.121002	0.442241	not_significant	0.261749	0.917207	2.8649	2.603	3.126	0.133	21.47	0	-0.0514	-0.058	-0.045	0.003	-15.823	0	TRUE
Syncope and collapse	symptoms	0.014	-0.378	0.406	0.2	0.07	1.0141	0.685231	1.5008	83	5468	39	2425	0.944232	0.976685	not_significant	0.00608012	0.0249212	2.8611	2.6	3.123	0.133	21.452	0	-0.0513	-0.058	-0.045	0.003	-15.783	0	TRUE
Synoviopathy	musculoskeletal	-0.69	-1.254	-0.126	0.288	-2.396	0.501576	0.285361	0.881615	25	5526	25	2439	0.016561	0.146056	not_significant	-0.299663	1.78091	2.8576	2.596	3.119	0.133	21.425	0	-0.051	-0.057	-0.045	0.003	-15.717	0	TRUE
Synovitis and tenosynovitis	musculoskeletal	0.2543	-0.111	0.62	0.186	1.364	1.28956	0.894939	1.85893	108	5443	43	2421	0.17258	0.501147	not_significant	0.110441	0.76301	2.8652	2.604	3.127	0.133	21.473	0	-0.0515	-0.058	-0.045	0.003	-15.831	0	TRUE
Systemic inflammatory response syndrome (SIRS)	injuries & poisonings	1.6593	-0.496	3.814	1.099	1.509	5.25563	0.608962	45.3314	10	5541	10	2454	0.131246	0.447603	not_significant	0.720625	0.881913	2.8647	2.603	3.126	0.133	21.464	0	-0.0514	-0.058	-0.045	0.003	-15.812	0	TRUE
Tachycardia NOS	circulatory system	0.7679	0.269	1.267	0.255	3.014	2.15524	1.30866	3.55019	86	5465	20	2444	0.00258009	0.0425005	mi_significant	0.333495	2.58837	2.8653	2.604	3.127	0.133	21.466	0	-0.0516	-0.058	-0.045	0.003	-15.864	0	TRUE
Temporomandibular joint disorder, unspecified	digestive	-0.0071	-0.806	0.792	0.408	-0.017	0.992925	0.446641	2.20781	20	5531	10	2454	0.986112	0.99392	not_significant	-0.00308349	0.00607381	2.8611	2.6	3.123	0.133	21.451	0	-0.0512	-0.058	-0.045	0.003	-15.785	0	TRUE
Tension headache	mental disorders	0.6897	-0.206	1.586	0.457	1.509	1.99312	0.813833	4.88417	27	5524	10	2454	0.131398	0.447603	not_significant	0.299533	0.88141	2.8586	2.597	3.12	0.133	21.428	0	-0.0512	-0.058	-0.045	0.003	-15.781	0	TRUE
Testicular hypofunction	endocrine/metabolic	1.7344	1.303	2.166	0.22	7.885	5.66553	3.68032	8.72332	280	5271	23	2441	3.15465e-15	3.33447e-12	mi_significant	0.75324	14.501	2.8249	2.561	3.088	0.134	21.016	0	-0.0514	-0.058	-0.045	0.003	-15.7	0	TRUE
Thoracic or lumbosacral neuritis or radiculitis, unspecified	symptoms	0.0561	-0.264	0.376	0.163	0.343	1.0577	0.767974	1.45645	124	5427	60	2404	0.731444	0.902142	not_significant	0.0243639	0.135819	2.8623	2.601	3.124	0.133	21.453	0	-0.0513	-0.058	-0.045	0.003	-15.779	0	TRUE
Throat pain	respiratory	0.5927	-0.004	1.189	0.304	1.948	1.80887	0.996008	3.2838	57	5494	14	2450	0.0514422	0.30208	not_significant	0.257406	1.28868	2.857	2.595	3.119	0.133	21.406	0	-0.0513	-0.058	-0.045	0.003	-15.778	0	TRUE
Thrombocytopenia	hematopoietic	1.556	0.688	2.424	0.443	3.514	4.73982	1.98973	11.2909	49	5502	10	2454	0.000441912	0.012975	mi_significant	0.675762	3.35466	2.8801	2.618	3.142	0.134	21.537	0	-0.0519	-0.058	-0.046	0.003	-15.938	0	TRUE
Thyroiditis	endocrine/metabolic	1.0178	-1.156	3.192	1.109	0.918	2.7671	0.314743	24.3371	10	5541	10	2454	0.358845	0.700191	not_significant	0.442025	0.445094	2.8624	2.601	3.124	0.133	21.458	0	-0.0513	-0.058	-0.045	0.003	-15.796	0	TRUE
Thyroiditis, acute and subacute	endocrine/metabolic	-0.1961	-2.609	2.216	1.231	-0.159	0.82193	0.0736081	9.17058	10	5541	10	2454	0.873432	0.944952	not_significant	-0.0851651	0.0587707	2.8613	2.6	3.123	0.133	21.452	0	-0.0512	-0.058	-0.045	0.003	-15.786	0	TRUE
Thyrotoxicosis with or without goiter	endocrine/metabolic	0.7306	-0.259	1.72	0.505	1.447	2.07633	0.771823	5.58453	21	5530	10	2454	0.147815	0.470603	not_significant	0.317296	0.830283	2.8623	2.601	3.124	0.133	21.452	0	-0.0513	-0.058	-0.045	0.003	-15.801	0	TRUE
Tinnitus	sense organs	-0.1282	-0.44	0.183	0.159	-0.806	0.879677	0.644036	1.20081	116	5435	67	2397	0.420117	0.727584	not_significant	-0.0556766	0.37663	2.8583	2.597	3.12	0.133	21.426	0	-0.0511	-0.057	-0.045	0.003	-15.717	0	TRUE
Tobacco use disorder	mental disorders	0.4399	-0.073	0.953	0.262	1.681	1.55255	0.929601	2.59348	65	5486	20	2444	0.092755	0.405132	not_significant	0.191046	1.03266	2.861	2.599	3.122	0.133	21.444	0	-0.0514	-0.058	-0.045	0.003	-15.809	0	TRUE
Torsion dystonia	neurological	0.4702	-1.129	2.069	0.816	0.576	1.60031	0.323356	7.9169	10	5541	10	2454	0.564405	0.820353	not_significant	0.204205	0.248409	2.8609	2.599	3.122	0.133	21.449	0	-0.0513	-0.058	-0.045	0.003	-15.786	0	TRUE
Torticollis	musculoskeletal	0.1801	-0.981	1.342	0.593	0.304	1.19734	0.374936	3.82669	11	5540	10	2454	0.761191	0.914093	not_significant	0.0782164	0.118506	2.8607	2.599	3.122	0.133	21.448	0	-0.0512	-0.058	-0.045	0.003	-15.784	0	TRUE
Toxic effect of venom	injuries & poisonings	0.6833	-0.564	1.931	0.637	1.073	1.9804	0.568929	6.8964	15	5536	10	2454	0.283108	0.642158	not_significant	0.296753	0.548047	2.8579	2.596	3.119	0.133	21.424	0	-0.0512	-0.058	-0.045	0.003	-15.769	0	TRUE
Toxic gastroenteritis and colitis	digestive	-0.5438	-1.693	0.605	0.586	-0.928	0.580538	0.183967	1.83125	10	5541	10	2454	0.353654	0.696113	not_significant	-0.236169	0.451421	2.8641	2.603	3.126	0.133	21.469	0	-0.0513	-0.058	-0.045	0.003	-15.8	0	TRUE
Transient cerebral ischemia	circulatory system	2.2578	0.17	4.345	1.065	2.12	9.56203	1.1853	77.092	10	5541	10	2454	0.0340255	0.227626	not_significant	0.98055	1.4682	2.8835	2.621	3.146	0.134	21.547	0	-0.0519	-0.058	-0.045	0.003	-15.913	0	TRUE
Traumatic arthropathy	injuries & poisonings	-0.1297	-2.574	2.314	1.247	-0.104	0.878359	0.07623	10.1148	10	5541	10	2454	0.91716	0.963609	not_significant	-0.056328	0.037555	2.8612	2.6	3.123	0.133	21.452	0	-0.0512	-0.058	-0.045	0.003	-15.785	0	TRUE
Trigeminal nerve disorders [CN5]	neurological	0.8002	-0.772	2.372	0.802	0.998	2.22599	0.462088	10.7188	10	5541	10	2454	0.31839	0.671732	not_significant	0.347522	0.497041	2.863	2.602	3.125	0.133	21.46	0	-0.0513	-0.058	-0.045	0.003	-15.8	0	TRUE
Tuberculosis	infectious diseases	1.2311	-0.956	3.418	1.116	1.103	3.42499	0.384428	30.5083	10	5541	10	2454	0.26996	0.624997	not_significant	0.53466	0.568701	2.863	2.602	3.124	0.133	21.461	0	-0.0513	-0.058	-0.045	0.003	-15.802	0	TRUE
Type 1 diabetes	endocrine/metabolic	2.1243	0.084	4.164	1.041	2.041	8.36704	1.08763	64.3283	14	5537	10	2454	0.0412405	0.256419	not_significant	0.922572	1.38468	2.8692	2.608	3.131	0.134	21.489	0	-0.0515	-0.058	-0.045	0.003	-15.846	0	TRUE
Type 2 diabetes	endocrine/metabolic	0.9958	0.603	1.389	0.201	4.966	2.70689	1.82759	4.01084	154	5397	32	2432	6.82583e-07	0.000120248	mi_significant	0.43247	6.16584	2.8987	2.636	3.161	0.134	21.616	0	-0.0527	-0.059	-0.046	0.003	-16.102	0	TRUE
Type 2 diabetes with ketoacidosis	endocrine/metabolic	-0.2828	-2.695	2.129	1.231	-0.23	0.753671	0.0675424	8.40646	10	5541	10	2454	0.818243	0.928887	not_significant	-0.122818	0.0871175	2.8615	2.6	3.123	0.133	21.453	0	-0.0513	-0.058	-0.045	0.003	-15.786	0	TRUE
Type 2 diabetes with neurological manifestations	endocrine/metabolic	1.9311	0.676	3.186	0.64	3.016	6.89709	1.966	24.1915	20	5531	10	2454	0.00256257	0.0425005	mi_significant	0.838666	2.59132	2.9088	2.645	3.172	0.135	21.627	0	-0.0525	-0.059	-0.046	0.003	-16.033	0	TRUE
Type 2 diabetes with ophthalmic manifestations	endocrine/metabolic	1.6739	0.461	2.887	0.619	2.705	5.33293	1.58566	17.9394	25	5526	10	2454	0.00682832	0.0833308	not_significant	0.726966	2.16569	2.8785	2.616	3.14	0.134	21.533	0	-0.0518	-0.058	-0.045	0.003	-15.907	0	TRUE
Type 2 diabetes with renal manifestations	endocrine/metabolic	1.5491	0.56	2.538	0.504	3.071	4.70723	1.75067	12.6543	28	5523	10	2454	0.00213629	0.0403225	mi_significant	0.672766	2.67034	2.9012	2.638	3.164	0.134	21.616	0	-0.0524	-0.059	-0.046	0.003	-16.014	0	TRUE
Ulcer of esophagus	digestive	1.6566	-0.459	3.773	1.08	1.534	5.24146	0.631915	43.5104	10	5541	10	2454	0.124936	0.443715	not_significant	0.719452	0.903311	2.8671	2.605	3.129	0.133	21.481	0	-0.0514	-0.058	-0.045	0.003	-15.827	0	TRUE
Ulceration of intestine	digestive	0.6727	-0.66	2.005	0.68	0.99	1.95952	0.516851	7.42609	11	5540	10	2454	0.322353	0.674707	not_significant	0.29215	0.491669	2.8621	2.601	3.123	0.133	21.464	0	-0.0513	-0.058	-0.045	0.003	-15.803	0	TRUE
Ulceration of the lower GI tract	digestive	0.3269	-1.87	2.524	1.121	0.292	1.38666	0.154124	12.4784	10	5541	10	2454	0.770512	0.914093	not_significant	0.141971	0.113221	2.8603	2.599	3.122	0.133	21.443	0	-0.0512	-0.058	-0.045	0.003	-15.779	0	TRUE
Ulcerative colitis	digestive	0.853	-0.432	2.138	0.656	1.301	2.34668	0.649209	8.48246	13	5538	10	2454	0.193364	0.524048	not_significant	0.370453	0.713625	2.8633	2.602	3.125	0.133	21.466	0	-0.0513	-0.058	-0.045	0.003	-15.809	0	TRUE
Ulcerative colitis (chronic)	digestive	1.132	-0.377	2.641	0.77	1.47	3.10185	0.685916	14.0272	12	5539	10	2454	0.141542	0.460337	not_significant	0.491621	0.849116	2.8627	2.601	3.124	0.133	21.459	0	-0.0513	-0.058	-0.045	0.003	-15.804	0	TRUE
Umbilical hernia	digestive	0.3974	-0.265	1.059	0.338	1.177	1.48795	0.767206	2.88349	32	5519	13	2451	0.239371	0.593933	not_significant	0.172589	0.620928	2.8684	2.607	3.13	0.134	21.475	0	-0.0515	-0.058	-0.045	0.003	-15.822	0	TRUE
Unequal leg length (acquired)	musculoskeletal	-0.2007	-2.586	2.184	1.217	-0.165	0.818158	0.0753207	8.88176	10	5541	10	2454	0.868984	0.943928	not_significant	-0.0871629	0.0609883	2.8616	2.6	3.123	0.133	21.452	0	-0.0513	-0.058	-0.045	0.003	-15.787	0	TRUE
Unspecified diffuse connective tissue disease	dermatologic	0.6274	-1.706	2.961	1.191	0.527	1.87274	0.181591	19.3173	10	5541	10	2454	0.598292	0.830271	not_significant	0.272476	0.223087	2.8623	2.601	3.124	0.133	21.455	0	-0.0513	-0.058	-0.045	0.003	-15.791	0	TRUE
Unspecified disorder of lipoid metabolism	endocrine/metabolic	0.9239	-0.593	2.441	0.774	1.194	2.5191	0.552667	11.4845	11	5540	10	2454	0.232566	0.583902	not_significant	0.401245	0.633453	2.8603	2.599	3.122	0.133	21.445	0	-0.0513	-0.058	-0.045	0.003	-15.787	0	TRUE
Unspecified erythematous condition	dermatologic	-0.0718	-0.817	0.674	0.38	-0.189	0.930717	0.441755	1.96207	21	5530	11	2453	0.85021	0.93417	not_significant	-0.0311823	0.0704738	2.861	2.6	3.122	0.133	21.451	0	-0.0512	-0.058	-0.045	0.003	-15.78	0	TRUE
Unspecified osteomyelitis	musculoskeletal	0.3712	-1.31	2.053	0.858	0.433	1.44947	0.26982	7.79124	10	5541	10	2454	0.665192	0.862709	not_significant	0.16121	0.177053	2.862	2.601	3.123	0.133	21.455	0	-0.0513	-0.058	-0.045	0.003	-15.79	0	TRUE
Unstable angina (intermediate coronary syndrome)	circulatory system	0.7097	-0.588	2.008	0.662	1.072	2.03338	0.555437	7.44841	11	5540	10	2454	0.283836	0.642429	not_significant	0.308219	0.546933	2.8634	2.602	3.125	0.133	21.463	0	-0.0513	-0.058	-0.045	0.003	-15.804	0	TRUE
Upper gastrointestinal congenital anomalies	congenital anomalies	-0.9639	-2.95	1.022	1.013	-0.951	0.381403	0.0523397	2.77875	10	5541	10	2454	0.341422	0.690025	not_significant	-0.418616	0.466709	2.8627	2.601	3.124	0.133	21.461	0	-0.0513	-0.058	-0.045	0.003	-15.792	0	TRUE
Urethral discharge	genitourinary	0.1403	-1.229	1.509	0.698	0.201	1.15062	0.292585	4.52221	10	5541	10	2454	0.840825	0.930983	not_significant	0.0609315	0.0752946	2.8612	2.6	3.123	0.133	21.452	0	-0.0513	-0.058	-0.045	0.003	-15.786	0	TRUE
Urethral stricture (not specified as infectious)	genitourinary	0.7677	-1.39	2.925	1.101	0.697	2.1548	0.249075	18.6342	10	5541	10	2454	0.485497	0.767898	not_significant	0.333408	0.313814	2.8604	2.599	3.122	0.133	21.446	0	-0.0512	-0.058	-0.045	0.003	-15.783	0	TRUE
Urethritis and urethral syndrome	genitourinary	0.3599	-0.934	1.654	0.66	0.545	1.43319	0.392979	5.22785	10	5541	10	2454	0.585661	0.829869	not_significant	0.156303	0.232354	2.8602	2.599	3.122	0.133	21.445	0	-0.0512	-0.058	-0.045	0.003	-15.783	0	TRUE
Urinary calculus	genitourinary	0.7795	-1.473	3.032	1.149	0.678	2.18038	0.229237	20.7387	10	5541	10	2454	0.497535	0.773375	not_significant	0.338533	0.303176	2.8619	2.6	3.123	0.133	21.455	0	-0.0513	-0.058	-0.045	0.003	-15.792	0	TRUE
Urinary complications NEC	genitourinary	-0.2226	-1.941	1.496	0.877	-0.254	0.800435	0.14356	4.4638	10	5541	10	2454	0.799546	0.920064	not_significant	-0.096674	0.0971568	2.8615	2.6	3.123	0.133	21.453	0	-0.0513	-0.058	-0.045	0.003	-15.787	0	TRUE
Urinary incontinence	genitourinary	0.8349	0.119	1.551	0.366	2.284	2.30458	1.12637	4.71618	40	5511	10	2454	0.0223579	0.17636	not_significant	0.362592	1.65057	2.8727	2.611	3.135	0.134	21.502	0	-0.0516	-0.058	-0.045	0.003	-15.872	0	TRUE
Urinary obstruction	genitourinary	1.1556	-0.404	2.716	0.796	1.452	3.17593	0.667644	15.1197	10	5541	10	2454	0.1465	0.467825	not_significant	0.501871	0.834164	2.8691	2.607	3.131	0.134	21.481	0	-0.0515	-0.058	-0.045	0.003	-15.83	0	TRUE
Urinary tract infection	genitourinary	0.3802	-0.156	0.916	0.274	1.39	1.46258	0.855559	2.49927	52	5499	20	2444	0.164483	0.493918	not_significant	0.165119	0.783878	2.8686	2.607	3.13	0.134	21.48	0	-0.0515	-0.058	-0.045	0.003	-15.833	0	TRUE
Urticaria	dermatologic	0.4581	-0.088	1.004	0.278	1.645	1.58107	0.915761	2.72918	63	5488	17	2447	0.100015	0.417851	not_significant	0.19895	0.999933	2.8548	2.593	3.116	0.133	21.394	0	-0.0512	-0.058	-0.045	0.003	-15.764	0	TRUE
Uveitis, noninfectious or NOS	sense organs	-0.4014	-1.415	0.612	0.517	-0.776	0.669382	0.242926	1.84412	10	5541	10	2454	0.437777	0.741841	not_significant	-0.174326	0.358747	2.8601	2.599	3.122	0.133	21.443	0	-0.0512	-0.058	-0.045	0.003	-15.768	0	TRUE
Valvular heart disease/ heart chambers	congenital anomalies	-0.0806	-1.474	1.313	0.711	-0.113	0.922563	0.229008	3.71731	10	5541	10	2454	0.909704	0.96252	not_significant	-0.0350041	0.0410999	2.8613	2.6	3.123	0.133	21.452	0	-0.0512	-0.058	-0.045	0.003	-15.786	0	TRUE
Varicose veins	circulatory system	1.2756	0.579	1.972	0.355	3.589	3.58085	1.78425	7.18503	77	5474	10	2454	0.000332127	0.0109706	mi_significant	0.553986	3.4787	2.8424	2.581	3.104	0.134	21.29	0	-0.051	-0.057	-0.045	0.003	-15.703	0	TRUE
Varicose veins of lower extremity	circulatory system	0.6879	-0.145	1.521	0.425	1.619	1.98953	0.865022	4.5768	30	5521	10	2454	0.105542	0.424173	not_significant	0.298751	0.976576	2.8601	2.599	3.122	0.133	21.437	0	-0.0513	-0.058	-0.045	0.003	-15.792	0	TRUE
Varicose veins of lower extremity, symptomtic	circulatory system	0.3162	-0.521	1.153	0.427	0.74	1.3719	0.593926	3.16768	21	5530	10	2454	0.459222	0.752383	not_significant	0.137324	0.337978	2.8625	2.601	3.124	0.133	21.458	0	-0.0513	-0.058	-0.045	0.003	-15.798	0	TRUE
Vascular disorders of skin	dermatologic	0.4602	-1.847	2.767	1.177	0.391	1.58439	0.15771	15.9108	10	5541	10	2454	0.695805	0.879457	not_significant	0.199862	0.157512	2.8615	2.6	3.123	0.133	21.453	0	-0.0513	-0.058	-0.045	0.003	-15.788	0	TRUE
Vascular hamartomas and non-neoplastic nevi	neoplasms	0.0675	-1.578	1.713	0.84	0.08	1.06983	0.206387	5.54557	10	5541	10	2454	0.935922	0.976448	not_significant	0.0293149	0.0287606	2.861	2.6	3.122	0.133	21.45	0	-0.0512	-0.058	-0.045	0.003	-15.785	0	TRUE
Venereal diseases due to Chlamydia trachomatis	infectious diseases	-0.4015	-3.266	2.463	1.461	-0.275	0.669315	0.0381588	11.74	10	5541	10	2454	0.783494	0.916968	not_significant	-0.174369	0.105964	2.8606	2.599	3.122	0.133	21.446	0	-0.0512	-0.058	-0.045	0.003	-15.778	0	TRUE
Ventral hernia	digestive	0.3716	-0.432	1.175	0.41	0.906	1.45005	0.649209	3.23814	21	5530	10	2454	0.364903	0.702655	not_significant	0.161384	0.437822	2.8662	2.604	3.128	0.134	21.466	0	-0.0514	-0.058	-0.045	0.003	-15.808	0	TRUE
Ventricular fibrillation and flutter	circulatory system	-0.5628	-2.074	0.948	0.771	-0.73	0.569612	0.125682	2.58054	10	5541	10	2454	0.465409	0.756827	not_significant	-0.244421	0.332165	2.862	2.601	3.123	0.133	21.456	0	-0.0513	-0.058	-0.045	0.003	-15.787	0	TRUE
Vertiginous syndromes and other disorders of vestibular system	sense organs	0.2628	-2.147	2.673	1.229	0.214	1.30057	0.116834	14.4834	10	5541	10	2454	0.830733	0.930983	not_significant	0.114133	0.0805384	2.8615	2.6	3.123	0.133	21.452	0	-0.0513	-0.058	-0.045	0.003	-15.786	0	TRUE
Villonodular synovitis	musculoskeletal	-0.2186	-2.623	2.186	1.227	-0.178	0.803643	0.0725848	8.89954	10	5541	10	2454	0.858556	0.939435	not_significant	-0.0949368	0.0662313	2.8613	2.6	3.123	0.133	21.452	0	-0.0512	-0.058	-0.045	0.003	-15.786	0	TRUE
Viral Enteritis	infectious diseases	0.1859	-0.81	1.182	0.508	0.366	1.2043	0.444858	3.26089	14	5537	10	2454	0.714495	0.892697	not_significant	0.0807353	0.146001	2.8616	2.6	3.123	0.133	21.454	0	-0.0513	-0.058	-0.045	0.003	-15.789	0	TRUE
Viral hepatitis A	infectious diseases	-0.4707	-2.484	1.542	1.027	-0.458	0.624565	0.0834089	4.67393	10	5541	10	2454	0.646743	0.849201	not_significant	-0.204422	0.189268	2.8602	2.599	3.122	0.133	21.442	0	-0.0512	-0.058	-0.045	0.003	-15.773	0	TRUE
Viral hepatitis B	infectious diseases	0.7312	-0.349	1.811	0.551	1.327	2.07757	0.705393	6.11656	20	5531	10	2454	0.184645	0.518274	not_significant	0.317556	0.733663	2.8574	2.596	3.119	0.133	21.422	0	-0.0512	-0.058	-0.045	0.003	-15.771	0	TRUE
Viral infection	infectious diseases	0.2804	-0.075	0.636	0.181	1.546	1.32366	0.927743	1.88891	124	5427	43	2421	0.122061	0.443364	not_significant	0.121776	0.913421	2.8577	2.596	3.119	0.133	21.42	0	-0.0513	-0.058	-0.045	0.003	-15.797	0	TRUE
Viral pneumonia	respiratory	0.1458	-1.13	1.421	0.651	0.224	1.15696	0.323033	4.14126	10	5541	10	2454	0.822721	0.93007	not_significant	0.0633201	0.0847477	2.8617	2.6	3.123	0.133	21.452	0	-0.0513	-0.058	-0.045	0.003	-15.786	0	TRUE
Viral warts & HPV	infectious diseases	0.2896	-0.022	0.602	0.159	1.819	1.33589	0.97824	1.82577	159	5392	57	2407	0.0688711	0.354331	not_significant	0.125772	1.16196	2.8607	2.599	3.122	0.133	21.441	0	-0.0514	-0.058	-0.045	0.003	-15.825	0	TRUE
Viremia, NOS	infectious diseases	0.1867	-0.249	0.622	0.222	0.84	1.20527	0.77958	1.86265	77	5474	29	2435	0.400737	0.717068	not_significant	0.0810828	0.397141	2.8592	2.598	3.121	0.133	21.436	0	-0.0513	-0.058	-0.045	0.003	-15.789	0	TRUE
Visual disturbances	sense organs	0.528	0.128	0.928	0.204	2.588	1.69554	1.13655	2.52945	108	5443	34	2430	0.00964793	0.101319	not_significant	0.229307	2.01557	2.8736	2.612	3.135	0.134	21.505	0	-0.0518	-0.058	-0.045	0.003	-15.898	0	TRUE
Visual field defects	sense organs	0.6926	-0.618	2.003	0.669	1.036	1.99891	0.539021	7.41126	11	5540	10	2454	0.300355	0.65799	not_significant	0.300792	0.522366	2.863	2.602	3.124	0.133	21.461	0	-0.0513	-0.058	-0.045	0.003	-15.803	0	TRUE
Vitamin B-complex deficiencies	endocrine/metabolic	0.9572	0.363	1.552	0.303	3.155	2.60439	1.43764	4.7209	69	5482	14	2450	0.00160302	0.0323606	mi_significant	0.415707	2.79506	2.8705	2.609	3.132	0.134	21.496	0	-0.0517	-0.058	-0.045	0.003	-15.892	0	TRUE
Vitamin D deficiency	endocrine/metabolic	0.7382	0.459	1.018	0.143	5.175	2.09217	1.58249	2.76765	289	5262	64	2400	2.27644e-07	5.39295e-05	mi_significant	0.320596	6.64274	2.8401	2.578	3.102	0.134	21.242	0	-0.0514	-0.058	-0.045	0.003	-15.795	0	TRUE
Vitamin deficiency	endocrine/metabolic	1.4669	-0.591	3.525	1.05	1.397	4.33577	0.553773	33.9538	11	5540	10	2454	0.162486	0.489309	not_significant	0.637067	0.789185	2.8576	2.596	3.119	0.133	21.419	0	-0.0512	-0.058	-0.045	0.003	-15.765	0	TRUE
Vitiligo	dermatologic	0.6854	-0.601	1.972	0.656	1.044	1.98457	0.548263	7.18503	12	5539	10	2454	0.296454	0.656923	not_significant	0.297665	0.528042	2.8617	2.6	3.123	0.133	21.453	0	-0.0513	-0.058	-0.045	0.003	-15.795	0	TRUE
Voice disturbance	respiratory	1.2286	0.496	1.961	0.374	3.287	3.41644	1.64214	7.10643	51	5500	10	2454	0.00101376	0.0224426	mi_significant	0.533574	2.99406	2.884	2.622	3.146	0.134	21.546	0	-0.052	-0.058	-0.046	0.003	-15.946	0	TRUE
Wheezing	respiratory	1.0087	0.419	1.598	0.301	3.353	2.74203	1.52044	4.94314	69	5482	14	2450	0.0007985	0.0187559	mi_significant	0.438073	3.09772	2.8777	2.616	3.14	0.134	21.531	0	-0.0519	-0.058	-0.045	0.003	-15.932	0	TRUE

## Sheet: after_sdoh
phenotype	phecode_category	coef_has_phenotype	ci_lb_has_phenotype	ci_ub_has_phenotype	std err_has_phenotype	z_has_phenotype	odds_ratio_has_phenotype	ci_lb_or_has_phenotype	ci_ub_or_has_phenotype	Count_mi	Count_r_mi	Count_con	Count_r_con	pval_has_phenotype	pval_BH_adj_has_phenotype	significance_bh	log10_OR_has_phenotype	-log10_pval_has_phenotype	coef_Intercept	ci_lb_Intercept	ci_ub_Intercept	std err_Intercept	z_Intercept	pval_Intercept	coef_mi_or_vas_est_age	ci_lb_mi_or_vas_est_age	ci_ub_mi_or_vas_est_age	std err_mi_or_vas_est_age	z_mi_or_vas_est_age	pval_mi_or_vas_est_age	coef_ethnicity[T.Not Hispanic or Latino]	ci_lb_ethnicity[T.Not Hispanic or Latino]	ci_ub_ethnicity[T.Not Hispanic or Latino]	std err_ethnicity[T.Not Hispanic or Latino]	z_ethnicity[T.Not Hispanic or Latino]	pval_ethnicity[T.Not Hispanic or Latino]	coef_ethnicity[T.No matching concept]	ci_lb_ethnicity[T.No matching concept]	ci_ub_ethnicity[T.No matching concept]	std err_ethnicity[T.No matching concept]	z_ethnicity[T.No matching concept]	pval_ethnicity[T.No matching concept]	coef_race[T.No matching concept]	ci_lb_race[T.No matching concept]	ci_ub_race[T.No matching concept]	std err_race[T.No matching concept]	z_race[T.No matching concept]	pval_race[T.No matching concept]	coef_race[T.Asian]
Abdominal aortic aneurysm	circulatory system	1.1765	-1.17	3.523	1.197	0.982	3.243	0.310367	33.8859	10	5541	10	2454	0.325854	0.601096	not_significant	0.510947	0.486977	2.73	1.536	3.924	0.609	4.48	0	-0.0468	-0.053	-0.04	0.003	-14.116	0	0.818	0.634	1.002	0.094	8.709	0	0.8082	0.589	1.027	0.112	7.229	0	-0.5208	-1.688	0.646	0.595	-0.875	0.382	0.0659
Abdominal hernia	digestive	0.0046	-1.571	1.58	0.804	0.006	1.00461	0.207837	4.85496	10	5541	10	2454	0.995433	0.999239	not_significant	0.00199775	0.00198786	2.7226	1.528	3.917	0.609	4.468	0	-0.0466	-0.053	-0.04	0.003	-14.076	0	0.8182	0.634	1.002	0.094	8.712	0	0.808	0.589	1.027	0.112	7.228	0	-0.5203	-1.687	0.647	0.595	-0.874	0.382	0.067
Abdominal pain	symptoms	0.3541	0.163	0.546	0.098	3.624	1.4249	1.17704	1.72633	480	5071	168	2296	0.000289834	0.00850985	mi_significant	0.153784	3.53785	2.6821	1.492	3.872	0.607	4.417	0	-0.0469	-0.053	-0.04	0.003	-14.17	0	0.8194	0.635	1.004	0.094	8.718	0	0.8204	0.601	1.04	0.112	7.332	0	-0.49	-1.653	0.672	0.593	-0.826	0.409	0.093
Abnormal arterial blood gases	symptoms	0.4283	-1.319	2.176	0.892	0.48	1.53465	0.267403	8.81099	10	5541	10	2454	0.630958	0.80839	not_significant	0.186008	0.2	2.7244	1.53	3.919	0.609	4.471	0	-0.0466	-0.053	-0.04	0.003	-14.093	0	0.818	0.634	1.002	0.094	8.709	0	0.808	0.589	1.027	0.112	7.228	0	-0.5204	-1.687	0.646	0.595	-0.874	0.382	0.0668
Abnormal coagulation profile	hematopoietic	0.2937	-1.066	1.654	0.694	0.423	1.34138	0.344383	5.22785	10	5541	10	2454	0.672155	0.833572	not_significant	0.127552	0.172531	2.7249	1.531	3.919	0.609	4.472	0	-0.0466	-0.053	-0.04	0.003	-14.094	0	0.8181	0.634	1.002	0.094	8.712	0	0.8084	0.589	1.027	0.112	7.232	0	-0.5208	-1.688	0.646	0.595	-0.875	0.382	0.0667
Abnormal electrocardiogram [ECG] [EKG]	circulatory system	0.8839	0.486	1.282	0.203	4.357	2.42032	1.6258	3.60384	137	5414	34	2430	1.31677e-05	0.0012653	mi_significant	0.383873	4.88049	2.7455	1.545	3.946	0.613	4.481	0	-0.0478	-0.054	-0.041	0.003	-14.359	0	0.8198	0.635	1.004	0.094	8.708	0	0.8197	0.6	1.039	0.112	7.322	0	-0.5098	-1.683	0.664	0.599	-0.852	0.394	0.074
Abnormal findings examination of lungs	respiratory	0.6835	0.267	1.1	0.212	3.218	1.9808	1.30604	3.00417	112	5439	31	2433	0.00129077	0.0248063	mi_significant	0.29684	2.88915	2.7376	1.543	3.932	0.61	4.491	0	-0.0469	-0.053	-0.04	0.003	-14.165	0	0.8186	0.634	1.003	0.094	8.71	0	0.8094	0.59	1.029	0.112	7.237	0	-0.5296	-1.697	0.638	0.596	-0.889	0.374	0.0572
Abnormal findings on exam of gastrointestinal tract/ abdominal area	digestive	0.278	-0.392	0.948	0.342	0.813	1.32049	0.675704	2.58054	28	5523	14	2450	0.41606	0.683943	not_significant	0.120734	0.380844	2.7261	1.532	3.92	0.609	4.474	0	-0.0467	-0.053	-0.04	0.003	-14.104	0	0.8186	0.635	1.003	0.094	8.716	0	0.809	0.59	1.028	0.112	7.237	0	-0.521	-1.688	0.646	0.595	-0.875	0.382	0.0655
Abnormal findings on study of brain and/or nervous system	neurological	0.8281	-1.614	3.271	1.246	0.665	2.28897	0.19909	26.3377	10	5541	10	2454	0.50635	0.740266	not_significant	0.359639	0.295549	2.7274	1.533	3.922	0.609	4.476	0	-0.0467	-0.053	-0.04	0.003	-14.101	0	0.8174	0.633	1.002	0.094	8.704	0	0.8082	0.589	1.027	0.112	7.23	0	-0.5212	-1.688	0.646	0.595	-0.875	0.381	0.0672
Abnormal function study of cardiovascular system	circulatory system	0.0448	-1.049	1.139	0.558	0.08	1.04582	0.350288	3.12364	13	5538	10	2454	0.935958	0.975648	not_significant	0.0194564	0.0287439	2.7229	1.529	3.917	0.609	4.469	0	-0.0466	-0.053	-0.04	0.003	-14.084	0	0.8181	0.634	1.002	0.094	8.71	0	0.808	0.589	1.027	0.112	7.229	0	-0.5204	-1.687	0.646	0.595	-0.874	0.382	0.0668
Abnormal heart sounds	circulatory system	-0.0049	-0.676	0.666	0.342	-0.014	0.995112	0.508648	1.94644	27	5524	15	2449	0.9886	0.995959	not_significant	-0.00212804	0.00497925	2.7225	1.528	3.917	0.609	4.468	0	-0.0466	-0.053	-0.04	0.003	-14.081	0	0.8182	0.634	1.002	0.094	8.712	0	0.808	0.589	1.027	0.112	7.228	0	-0.5203	-1.687	0.647	0.595	-0.874	0.382	0.0671
Abnormal involuntary movements	neurological	0.3057	-0.15	0.761	0.232	1.316	1.35757	0.860708	2.14042	70	5481	30	2434	0.188132	0.47702	not_significant	0.132764	0.725537	2.733	1.538	3.928	0.61	4.484	0	-0.0468	-0.053	-0.04	0.003	-14.134	0	0.8193	0.635	1.003	0.094	8.721	0	0.812	0.593	1.031	0.112	7.26	0	-0.525	-1.692	0.642	0.596	-0.882	0.378	0.0623
Abnormal posture	symptoms	1.4286	-0.707	3.564	1.089	1.311	4.17285	0.493121	35.3041	10	5541	10	2454	0.189744	0.478663	not_significant	0.620433	0.721832	2.723	1.529	3.917	0.609	4.47	0	-0.0466	-0.053	-0.04	0.003	-14.08	0	0.8164	0.632	1	0.094	8.692	0	0.808	0.589	1.027	0.112	7.229	0	-0.5212	-1.688	0.645	0.595	-0.876	0.381	0.0672
Abnormal results of function study of kidney	genitourinary	1.2019	-0.321	2.725	0.777	1.547	3.32643	0.725423	15.2564	12	5539	10	2454	0.121926	0.394116	not_significant	0.521979	0.913904	2.7215	1.527	3.916	0.609	4.467	0	-0.0466	-0.053	-0.04	0.003	-14.072	0	0.8177	0.634	1.002	0.094	8.706	0	0.8093	0.59	1.028	0.112	7.239	0	-0.5217	-1.688	0.645	0.595	-0.876	0.381	0.067
Abnormal results of function study of liver	digestive	0.5311	-0.056	1.118	0.3	1.773	1.7008	0.945539	3.05873	57	5494	16	2448	0.0762708	0.31615	not_significant	0.230654	1.11764	2.7287	1.534	3.923	0.609	4.477	0	-0.0467	-0.053	-0.04	0.003	-14.121	0	0.8199	0.636	1.004	0.094	8.728	0	0.8104	0.591	1.029	0.112	7.25	0	-0.5243	-1.691	0.643	0.595	-0.88	0.379	0.06
Abnormal results of function study of pulmonary system	respiratory	0.4294	-0.927	1.786	0.692	0.62	1.53634	0.395739	5.96554	10	5541	10	2454	0.535011	0.75871	not_significant	0.186486	0.271637	2.7225	1.528	3.917	0.609	4.468	0	-0.0466	-0.053	-0.04	0.003	-14.082	0	0.8177	0.634	1.002	0.094	8.706	0	0.8078	0.589	1.027	0.112	7.227	0	-0.5203	-1.687	0.646	0.595	-0.874	0.382	0.0671
Abnormal results of function study of thyroid	endocrine/metabolic	0.6698	-0.182	1.522	0.435	1.541	1.95385	0.833601	4.58138	28	5523	10	2454	0.12325	0.395414	not_significant	0.29089	0.909213	2.7229	1.529	3.917	0.609	4.469	0	-0.0466	-0.053	-0.04	0.003	-14.081	0	0.8172	0.633	1.001	0.094	8.7	0	0.8091	0.59	1.028	0.112	7.237	0	-0.5234	-1.69	0.643	0.595	-0.879	0.379	0.0657
Abnormal results of other function studies (bladder, pancreas, placenta, spleen, etc)	symptoms	1.3831	-0.699	3.465	1.062	1.302	3.98724	0.497082	31.9765	10	5541	10	2454	0.192894	0.482771	not_significant	0.600673	0.714682	2.7204	1.526	3.914	0.609	4.466	0	-0.0465	-0.053	-0.04	0.003	-14.064	0	0.8167	0.633	1.001	0.094	8.696	0	0.8078	0.589	1.027	0.112	7.227	0	-0.5206	-1.687	0.646	0.595	-0.875	0.382	0.0669
Abnormal spermatozoa	genitourinary	2.1441	0.969	3.319	0.599	3.577	8.53436	2.63531	27.6327	65	5486	10	2454	0.000347082	0.00940681	mi_significant	0.931171	3.45957	2.7125	1.518	3.907	0.609	4.451	0	-0.0464	-0.053	-0.04	0.003	-14.02	0	0.8246	0.64	1.009	0.094	8.761	0	0.8139	0.594	1.033	0.112	7.27	0	-0.5295	-1.697	0.637	0.595	-0.889	0.374	0.0495
Abnormality of gait	neurological	1.6383	0.114	3.163	0.778	2.106	5.14641	1.12075	23.6414	16	5535	10	2454	0.0351946	0.210173	not_significant	0.711505	1.45352	2.7366	1.542	3.931	0.609	4.49	0	-0.0469	-0.053	-0.04	0.003	-14.161	0	0.8161	0.632	1	0.094	8.688	0	0.8082	0.589	1.027	0.112	7.229	0	-0.5218	-1.689	0.645	0.595	-0.876	0.381	0.0645
Acid-base balance disorder	endocrine/metabolic	0.9074	-0.706	2.521	0.823	1.102	2.47787	0.493615	12.441	10	5541	10	2454	0.270387	0.569565	not_significant	0.394079	0.568015	2.7267	1.532	3.921	0.609	4.475	0	-0.0467	-0.053	-0.04	0.003	-14.108	0	0.8175	0.633	1.002	0.094	8.704	0	0.8079	0.589	1.027	0.112	7.228	0	-0.5206	-1.687	0.646	0.595	-0.874	0.382	0.0672
Acidosis	endocrine/metabolic	0.2838	-0.553	1.12	0.427	0.665	1.32817	0.575222	3.06485	20	5531	10	2454	0.506059	0.740266	not_significant	0.123253	0.295798	2.7161	1.52	3.912	0.61	4.451	0	-0.0467	-0.053	-0.04	0.003	-14.101	0	0.8178	0.634	1.002	0.094	8.706	0	0.8075	0.588	1.027	0.112	7.224	0	-0.5104	-1.679	0.658	0.596	-0.856	0.392	0.0767
Acne	dermatologic	0.2902	-0.223	0.803	0.262	1.109	1.33669	0.800115	2.23223	71	5480	21	2443	0.267268	0.568026	not_significant	0.126032	0.573053	2.7025	1.505	3.9	0.611	4.422	0	-0.0465	-0.053	-0.04	0.003	-14.058	0	0.8179	0.634	1.002	0.094	8.709	0	0.8087	0.59	1.028	0.112	7.235	0	-0.5052	-1.675	0.665	0.597	-0.846	0.398	0.0802
Acquired absence of limb		0.8548	-1.363	3.072	1.131	0.756	2.3509	0.255892	21.585	10	5541	10	2454	0.449945	0.709839	not_significant	0.371235	0.346841	2.7227	1.529	3.917	0.609	4.469	0	-0.0466	-0.053	-0.04	0.003	-14.085	0	0.8178	0.634	1.002	0.094	8.708	0	0.8079	0.589	1.027	0.112	7.228	0	-0.5203	-1.687	0.646	0.595	-0.874	0.382	0.0672
Acquired absence of organs		0.7386	0.246	1.231	0.251	2.938	2.093	1.2789	3.42465	79	5472	23	2441	0.00330777	0.0431643	mi_significant	0.32077	2.48047	2.6937	1.501	3.886	0.608	4.428	0	-0.0472	-0.054	-0.041	0.003	-14.228	0	0.8192	0.635	1.003	0.094	8.714	0	0.8147	0.595	1.034	0.112	7.281	0	-0.4759	-1.641	0.689	0.594	-0.801	0.423	0.1114
Acquired acanthosis nigricans	dermatologic	1.4574	-0.684	3.599	1.093	1.334	4.29478	0.504595	36.5617	10	5541	10	2454	0.182237	0.472119	not_significant	0.632941	0.739364	2.7251	1.531	3.92	0.609	4.471	0	-0.0467	-0.053	-0.04	0.003	-14.107	0	0.8216	0.637	1.006	0.094	8.743	0	0.814	0.595	1.033	0.112	7.277	0	-0.5254	-1.693	0.642	0.595	-0.882	0.378	0.0635
Acquired deformities of finger	musculoskeletal	-0.0455	-1.106	1.015	0.541	-0.084	0.95552	0.33088	2.75936	15	5536	10	2454	0.933048	0.974537	not_significant	-0.0197604	0.0300962	2.7226	1.528	3.917	0.609	4.469	0	-0.0466	-0.053	-0.04	0.003	-14.087	0	0.8182	0.634	1.002	0.094	8.713	0	0.8079	0.589	1.027	0.112	7.227	0	-0.5202	-1.687	0.647	0.595	-0.874	0.382	0.0673
Acquired foot deformities	musculoskeletal	0.3917	-0.512	1.295	0.461	0.85	1.47949	0.599296	3.651	19	5532	10	2454	0.395463	0.670635	not_significant	0.170113	0.402894	2.7248	1.531	3.919	0.609	4.472	0	-0.0466	-0.053	-0.04	0.003	-14.097	0	0.8176	0.633	1.002	0.094	8.704	0	0.807	0.588	1.026	0.112	7.219	0	-0.5211	-1.688	0.646	0.595	-0.875	0.381	0.0664
Acquired hemolytic anemias	hematopoietic	-2.2132	-4.577	0.15	1.206	-1.835	0.10935	0.0102857	1.16183	10	5541	10	2454	0.0664656	0.300406	not_significant	-0.961181	1.1774	2.7224	1.528	3.917	0.609	4.468	0	-0.0466	-0.053	-0.04	0.003	-14.083	0	0.819	0.635	1.003	0.094	8.721	0	0.8106	0.592	1.03	0.112	7.251	0	-0.5199	-1.687	0.647	0.595	-0.873	0.383	0.0685
Acquired hypothyroidism	endocrine/metabolic	0.4709	-0.207	1.148	0.346	1.362	1.60143	0.81302	3.15188	42	5509	12	2452	0.173173	0.460535	not_significant	0.204509	0.76152	2.7283	1.534	3.923	0.609	4.477	0	-0.0467	-0.053	-0.04	0.003	-14.114	0	0.8173	0.633	1.001	0.094	8.702	0	0.8061	0.587	1.025	0.112	7.21	0	-0.5225	-1.689	0.644	0.595	-0.878	0.38	0.0634
Acquired spondylolisthesis	musculoskeletal	-0.0214	-0.745	0.703	0.369	-0.058	0.978827	0.474734	2.0198	22	5529	13	2451	0.953828	0.980443	not_significant	-0.0092939	0.0205299	2.7223	1.528	3.916	0.609	4.468	0	-0.0466	-0.053	-0.04	0.003	-14.075	0	0.8182	0.634	1.002	0.094	8.712	0	0.8079	0.589	1.027	0.112	7.228	0	-0.5202	-1.687	0.647	0.595	-0.874	0.382	0.0671
Acquired toe deformities	musculoskeletal	0.7749	-1.435	2.985	1.127	0.687	2.17038	0.238115	19.7865	10	5541	10	2454	0.491856	0.729925	not_significant	0.336535	0.308162	2.7236	1.529	3.918	0.609	4.47	0	-0.0466	-0.053	-0.04	0.003	-14.094	0	0.8189	0.635	1.003	0.094	8.719	0	0.8075	0.588	1.027	0.112	7.224	0	-0.5213	-1.688	0.646	0.595	-0.876	0.381	0.066
Actinic keratosis	dermatologic	0.3252	-0.015	0.666	0.174	1.871	1.38431	0.985112	1.94644	98	5453	58	2406	0.0613128	0.289553	not_significant	0.141233	1.21245	2.7537	1.558	3.949	0.61	4.516	0	-0.0473	-0.054	-0.041	0.003	-14.197	0	0.8142	0.63	0.998	0.094	8.664	0	0.8058	0.587	1.025	0.112	7.206	0	-0.5236	-1.691	0.644	0.596	-0.879	0.379	0.0668
Acute and chronic tonsillitis	respiratory	-0.1884	-2.614	2.238	1.238	-0.152	0.828283	0.073241	9.37456	10	5541	10	2454	0.879046	0.949855	not_significant	-0.0818211	0.0559886	2.7232	1.529	3.917	0.609	4.469	0	-0.0466	-0.053	-0.04	0.003	-14.086	0	0.8178	0.634	1.002	0.094	8.706	0	0.8079	0.589	1.027	0.112	7.227	0	-0.5203	-1.687	0.647	0.595	-0.874	0.382	0.0674
Acute and subacute necrosis of liver	digestive	0.2412	-1.585	2.068	0.932	0.259	1.27278	0.204948	7.90899	10	5541	10	2454	0.795731	0.912242	not_significant	0.104752	0.0992338	2.7236	1.529	3.918	0.609	4.47	0	-0.0466	-0.053	-0.04	0.003	-14.088	0	0.818	0.634	1.002	0.094	8.71	0	0.8079	0.589	1.027	0.112	7.228	0	-0.5204	-1.687	0.646	0.595	-0.874	0.382	0.0671
Acute appendicitis	digestive	-0.2903	-1.647	1.066	0.692	-0.419	0.748039	0.192627	2.90374	10	5541	10	2454	0.674904	0.834355	not_significant	-0.126076	0.170758	2.7226	1.529	3.917	0.609	4.469	0	-0.0466	-0.053	-0.04	0.003	-14.085	0	0.8177	0.634	1.002	0.094	8.706	0	0.8071	0.588	1.026	0.112	7.22	0	-0.5197	-1.686	0.647	0.595	-0.873	0.383	0.0674
Acute bronchitis and bronchiolitis	respiratory	0.5072	0.156	0.859	0.179	2.828	1.66063	1.16883	2.3608	149	5402	45	2419	0.00468598	0.0544295	not_significant	0.220274	2.3292	2.7009	1.504	3.898	0.611	4.421	0	-0.0468	-0.053	-0.04	0.003	-14.132	0	0.8246	0.64	1.009	0.094	8.771	0	0.8126	0.593	1.032	0.112	7.263	0	-0.5052	-1.675	0.665	0.597	-0.846	0.397	0.0792
Acute bronchospasm	respiratory	0.462	-0.152	1.077	0.314	1.474	1.58725	0.858988	2.93586	39	5512	15	2449	0.140562	0.426935	not_significant	0.200644	0.852134	2.7278	1.533	3.922	0.609	4.476	0	-0.0467	-0.053	-0.04	0.003	-14.118	0	0.8194	0.635	1.004	0.094	8.724	0	0.8112	0.592	1.03	0.112	7.254	0	-0.5239	-1.691	0.643	0.595	-0.88	0.379	0.0642
Acute cystitis	genitourinary	1.3164	0.414	2.219	0.46	2.86	3.72997	1.51286	9.19813	35	5516	10	2454	0.00423876	0.050891	not_significant	0.571705	2.37276	2.7435	1.548	3.938	0.61	4.5	0	-0.0471	-0.054	-0.041	0.003	-14.206	0	0.8194	0.635	1.004	0.094	8.717	0	0.8106	0.591	1.03	0.112	7.248	0	-0.5259	-1.693	0.642	0.596	-0.883	0.377	0.061
Acute gastritis	digestive	0.7301	-0.383	1.843	0.568	1.285	2.07529	0.681813	6.31546	19	5532	10	2454	0.198744	0.48582	not_significant	0.317078	0.701705	2.7224	1.528	3.917	0.609	4.468	0	-0.0466	-0.053	-0.04	0.003	-14.085	0	0.8187	0.635	1.003	0.094	8.716	0	0.8096	0.59	1.029	0.112	7.241	0	-0.5223	-1.689	0.645	0.595	-0.877	0.38	0.0642
Acute laryngitis and tracheitis	respiratory	0.6658	-0.768	2.1	0.732	0.91	1.94605	0.46394	8.16617	10	5541	10	2454	0.362894	0.634016	not_significant	0.289153	0.44022	2.7293	1.535	3.924	0.609	4.479	0	-0.0467	-0.053	-0.04	0.003	-14.114	0	0.817	0.633	1.001	0.094	8.698	0	0.8077	0.589	1.027	0.112	7.225	0	-0.5215	-1.688	0.645	0.595	-0.876	0.381	0.0668
Acute osteomyelitis	musculoskeletal	-0.6815	-2.743	1.38	1.052	-0.648	0.505858	0.0643769	3.9749	10	5541	10	2454	0.517005	0.743868	not_significant	-0.295972	0.286505	2.7218	1.528	3.916	0.609	4.467	0	-0.0466	-0.053	-0.04	0.003	-14.08	0	0.8184	0.634	1.002	0.094	8.714	0	0.808	0.589	1.027	0.112	7.228	0	-0.5202	-1.687	0.647	0.595	-0.874	0.382	0.0675
Acute pain	neurological	0.0228	-0.272	0.318	0.15	0.152	1.02306	0.761854	1.37438	145	5406	77	2387	0.879479	0.949855	not_significant	0.00990191	0.0557747	2.7234	1.529	3.918	0.609	4.47	0	-0.0466	-0.053	-0.04	0.003	-14.081	0	0.8182	0.634	1.002	0.094	8.712	0	0.8081	0.589	1.027	0.112	7.229	0	-0.5208	-1.688	0.646	0.595	-0.875	0.382	0.0665
Acute pancreatitis	digestive	0.191	-0.98	1.362	0.597	0.32	1.21046	0.375311	3.90399	11	5540	10	2454	0.749202	0.891037	not_significant	0.0829502	0.125401	2.7217	1.527	3.916	0.609	4.467	0	-0.0466	-0.053	-0.04	0.003	-14.079	0	0.8186	0.634	1.003	0.094	8.715	0	0.8085	0.589	1.028	0.112	7.232	0	-0.5208	-1.688	0.646	0.595	-0.875	0.382	0.0666
Acute pericarditis	circulatory system	-0.4616	-1.816	0.892	0.691	-0.668	0.630274	0.162675	2.44	10	5541	10	2454	0.504	0.738873	not_significant	-0.20047	0.29757	2.7239	1.53	3.918	0.609	4.471	0	-0.0466	-0.053	-0.04	0.003	-14.094	0	0.818	0.634	1.002	0.094	8.71	0	0.8074	0.588	1.026	0.112	7.223	0	-0.5199	-1.687	0.647	0.595	-0.873	0.383	0.0673
Acute pharyngitis	respiratory	0.2949	0.039	0.551	0.131	2.258	1.34299	1.03977	1.73499	256	5295	90	2374	0.0239517	0.156278	not_significant	0.128073	1.62066	2.6999	1.502	3.897	0.611	4.419	0	-0.0465	-0.053	-0.04	0.003	-14.054	0	0.8191	0.635	1.003	0.094	8.719	0	0.812	0.593	1.031	0.112	7.262	0	-0.5117	-1.682	0.658	0.597	-0.857	0.391	0.0739
Acute posthemorrhagic anemia	hematopoietic	0.6591	0.009	1.31	0.332	1.986	1.93305	1.00904	3.70617	37	5514	14	2450	0.0470413	0.246755	not_significant	0.286243	1.32752	2.7371	1.542	3.932	0.61	4.49	0	-0.047	-0.053	-0.04	0.003	-14.172	0	0.8209	0.637	1.005	0.094	8.735	0	0.8129	0.594	1.032	0.112	7.269	0	-0.525	-1.692	0.642	0.596	-0.881	0.378	0.0627
Acute prostatitis	genitourinary	0.8452	-0.483	2.173	0.678	1.247	2.32844	0.61693	8.7846	10	5541	10	2454	0.212327	0.505344	not_significant	0.367066	0.672995	2.7294	1.535	3.924	0.609	4.479	0	-0.0467	-0.053	-0.04	0.003	-14.119	0	0.8174	0.633	1.001	0.094	8.703	0	0.808	0.589	1.027	0.112	7.228	0	-0.5208	-1.688	0.646	0.595	-0.875	0.382	0.0659
Acute reaction to stress	mental disorders	-0.3021	-1.061	0.457	0.387	-0.78	0.739264	0.34611	1.57933	21	5530	12	2452	0.43538	0.695162	not_significant	-0.1312	0.361131	2.7216	1.527	3.916	0.609	4.467	0	-0.0466	-0.053	-0.04	0.003	-14.076	0	0.8177	0.634	1.002	0.094	8.706	0	0.8069	0.588	1.026	0.112	7.218	0	-0.5192	-1.686	0.648	0.595	-0.872	0.383	0.0696
Acute renal failure	genitourinary	0.9481	0.335	1.561	0.313	3.032	2.5808	1.39794	4.76358	60	5491	14	2450	0.00243324	0.0353328	mi_significant	0.411755	2.61382	2.719	1.519	3.919	0.612	4.442	0	-0.0471	-0.054	-0.041	0.003	-14.208	0	0.8136	0.629	0.998	0.094	8.656	0	0.8106	0.591	1.03	0.112	7.248	0	-0.4978	-1.67	0.675	0.598	-0.832	0.405	0.0894
Acute sinusitis	respiratory	0.2414	-0.039	0.522	0.143	1.684	1.27303	0.961751	1.6854	192	5359	78	2386	0.092112	0.336894	not_significant	0.104839	1.03568	2.7156	1.52	3.911	0.61	4.451	0	-0.0467	-0.053	-0.04	0.003	-14.107	0	0.8197	0.636	1.004	0.094	8.726	0	0.8105	0.591	1.03	0.112	7.249	0	-0.5162	-1.685	0.652	0.596	-0.866	0.387	0.0698
Acute tonsillitis	respiratory	-0.0933	-1.098	0.911	0.512	-0.182	0.91092	0.333537	2.48681	11	5540	10	2454	0.855494	0.941543	not_significant	-0.0405197	0.067783	2.7223	1.528	3.916	0.609	4.468	0	-0.0466	-0.053	-0.04	0.003	-14.083	0	0.8182	0.634	1.002	0.094	8.712	0	0.8079	0.589	1.027	0.112	7.227	0	-0.5202	-1.687	0.647	0.595	-0.874	0.382	0.0672
Acute upper respiratory infections of multiple or unspecified sites	respiratory	0.4735	0.251	0.696	0.114	4.166	1.6056	1.28531	2.00571	396	5155	116	2348	3.09759e-05	0.00177292	mi_significant	0.205638	4.50898	2.7183	1.521	3.915	0.611	4.451	0	-0.0468	-0.053	-0.04	0.003	-14.139	0	0.8151	0.631	0.999	0.094	8.671	0	0.8147	0.595	1.034	0.112	7.282	0	-0.5249	-1.695	0.645	0.597	-0.879	0.379	0.0527
Adjustment reaction	mental disorders	0.4045	0.002	0.807	0.205	1.97	1.49855	1.002	2.24117	104	5447	36	2428	0.0488085	0.252674	not_significant	0.175672	1.3115	2.7285	1.534	3.923	0.609	4.477	0	-0.0467	-0.053	-0.04	0.003	-14.123	0	0.82	0.636	1.004	0.094	8.729	0	0.8118	0.593	1.031	0.112	7.261	0	-0.5258	-1.693	0.641	0.595	-0.883	0.377	0.0597
Adverse drug events and drug allergies	injuries & poisonings	0.1552	-1.531	1.841	0.86	0.18	1.16789	0.216319	6.30284	10	5541	10	2454	0.856813	0.941543	not_significant	0.0674025	0.0671142	2.7162	1.519	3.913	0.611	4.448	0	-0.0466	-0.053	-0.04	0.003	-14.081	0	0.8182	0.634	1.002	0.094	8.712	0	0.8081	0.589	1.027	0.112	7.229	0	-0.5144	-1.684	0.655	0.597	-0.862	0.389	0.073
Agorophobia, social phobia, and panic disorder	mental disorders	0.084	-0.525	0.693	0.311	0.27	1.08763	0.591555	1.99971	37	5514	16	2448	0.786927	0.909999	not_significant	0.0364807	0.104066	2.7216	1.527	3.916	0.609	4.467	0	-0.0466	-0.053	-0.04	0.003	-14.076	0	0.8183	0.634	1.002	0.094	8.713	0	0.8078	0.589	1.027	0.112	7.227	0	-0.5205	-1.687	0.646	0.595	-0.874	0.382	0.0666
Alcohol-related disorders	mental disorders	-0.0454	-0.674	0.583	0.321	-0.141	0.955615	0.509666	1.7914	27	5524	17	2447	0.88752	0.953363	not_significant	-0.019717	0.0518217	2.7224	1.528	3.917	0.609	4.468	0	-0.0466	-0.053	-0.04	0.003	-14.084	0	0.8181	0.634	1.002	0.094	8.712	0	0.8078	0.589	1.027	0.112	7.226	0	-0.52	-1.687	0.647	0.595	-0.873	0.382	0.0671
Alcoholic liver damage	mental disorders	0.2294	-0.789	1.248	0.52	0.441	1.25785	0.454299	3.48337	10	5541	10	2454	0.658938	0.826213	not_significant	0.0996272	0.181156	2.7253	1.531	3.92	0.609	4.472	0	-0.0466	-0.053	-0.04	0.003	-14.093	0	0.8185	0.634	1.003	0.094	8.715	0	0.8087	0.59	1.028	0.112	7.234	0	-0.5209	-1.688	0.646	0.595	-0.875	0.382	0.0665
Alcoholism	mental disorders	0.0991	-0.541	0.739	0.327	0.303	1.10418	0.582166	2.09384	28	5523	16	2448	0.761641	0.895018	not_significant	0.0430386	0.11825	2.7231	1.529	3.917	0.609	4.469	0	-0.0466	-0.053	-0.04	0.003	-14.089	0	0.8184	0.634	1.003	0.094	8.715	0	0.8084	0.589	1.027	0.112	7.231	0	-0.5208	-1.688	0.646	0.595	-0.875	0.382	0.0667
Allergic conjunctivitis	sense organs	-0.1105	-0.915	0.694	0.411	-0.269	0.895386	0.400517	2.00171	24	5527	10	2454	0.787821	0.909999	not_significant	-0.0479895	0.103572	2.7223	1.528	3.917	0.609	4.468	0	-0.0466	-0.053	-0.04	0.003	-14.086	0	0.8184	0.634	1.003	0.094	8.715	0	0.8081	0.589	1.027	0.112	7.23	0	-0.5199	-1.687	0.647	0.595	-0.873	0.382	0.0678
Allergic reaction to food	injuries & poisonings	0.0304	-1.259	1.32	0.658	0.046	1.03087	0.283938	3.74342	10	5541	10	2454	0.963187	0.981763	not_significant	0.0132026	0.0162895	2.7226	1.528	3.917	0.609	4.469	0	-0.0466	-0.053	-0.04	0.003	-14.087	0	0.8182	0.634	1.002	0.094	8.712	0	0.808	0.589	1.027	0.112	7.229	0	-0.5203	-1.687	0.646	0.595	-0.874	0.382	0.067
Allergic rhinitis	respiratory	0.6142	0.356	0.872	0.132	4.66	1.84818	1.42761	2.39169	317	5234	83	2381	3.15446e-06	0.000555712	mi_significant	0.266744	5.50107	2.7522	1.557	3.947	0.61	4.514	0	-0.0473	-0.054	-0.041	0.003	-14.243	0	0.8154	0.631	1	0.094	8.664	0	0.8089	0.589	1.028	0.112	7.226	0	-0.5439	-1.711	0.624	0.596	-0.913	0.361	0.036
Allergies, other	injuries & poisonings	0.495	0.024	0.966	0.241	2.058	1.6405	1.02429	2.62741	82	5469	25	2439	0.039615	0.22392	not_significant	0.214976	1.40214	2.7147	1.518	3.912	0.611	4.445	0	-0.0467	-0.053	-0.04	0.003	-14.107	0	0.8198	0.636	1.004	0.094	8.727	0	0.811	0.592	1.03	0.112	7.254	0	-0.5127	-1.682	0.657	0.597	-0.859	0.39	0.071
Alopecia	dermatologic	0.5909	0.107	1.074	0.247	2.396	1.80561	1.11293	2.92706	98	5453	22	2442	0.0165937	0.125282	not_significant	0.256625	1.78006	2.7232	1.529	3.917	0.609	4.471	0	-0.0465	-0.053	-0.04	0.003	-14.07	0	0.8135	0.629	0.998	0.094	8.658	0	0.8102	0.591	1.029	0.112	7.246	0	-0.5254	-1.692	0.641	0.595	-0.883	0.377	0.0584
Alopecia Areata	dermatologic	0.929	-0.56	2.418	0.76	1.223	2.53198	0.571209	11.2234	18	5533	10	2454	0.221509	0.522622	not_significant	0.40346	0.654609	2.7178	1.524	3.912	0.609	4.461	0	-0.0465	-0.053	-0.04	0.003	-14.049	0	0.8184	0.634	1.003	0.094	8.712	0	0.8079	0.589	1.027	0.112	7.226	0	-0.5226	-1.689	0.644	0.595	-0.878	0.38	0.0647
Alpha-1-antitrypsin deficiency	endocrine/metabolic	0.0713	-2.729	2.872	1.429	0.05	1.0739	0.0652845	17.6723	10	5541	10	2454	0.960201	0.980443	not_significant	0.0309652	0.017638	2.7228	1.529	3.917	0.609	4.469	0	-0.0466	-0.053	-0.04	0.003	-14.084	0	0.8182	0.634	1.002	0.094	8.712	0	0.808	0.589	1.027	0.112	7.228	0	-0.5203	-1.687	0.646	0.595	-0.874	0.382	0.067
Alteration of consciousness	mental disorders	0.3742	-0.343	1.091	0.366	1.023	1.45383	0.709638	2.97725	33	5518	11	2453	0.306361	0.582187	not_significant	0.162513	0.513767	2.7239	1.53	3.918	0.609	4.471	0	-0.0466	-0.053	-0.04	0.003	-14.092	0	0.8171	0.633	1.001	0.094	8.699	0	0.8085	0.589	1.028	0.112	7.233	0	-0.5217	-1.688	0.645	0.595	-0.876	0.381	0.0659
Altered mental status	mental disorders	1.1943	0.267	2.122	0.473	2.524	3.30125	1.30604	8.34782	25	5526	10	2454	0.0116078	0.102245	not_significant	0.518678	1.93525	2.746	1.551	3.941	0.61	4.504	0	-0.0471	-0.054	-0.041	0.003	-14.205	0	0.8172	0.633	1.001	0.094	8.695	0	0.8085	0.589	1.028	0.112	7.229	0	-0.5238	-1.691	0.644	0.596	-0.879	0.379	0.0651
Althete's foot	infectious diseases	0.5888	0.138	1.039	0.23	2.561	1.80182	1.14798	2.82639	82	5469	28	2436	0.0104228	0.0941619	not_significant	0.255713	1.98201	2.737	1.542	3.932	0.61	4.489	0	-0.047	-0.053	-0.04	0.003	-14.186	0	0.8229	0.639	1.007	0.094	8.753	0	0.8141	0.595	1.033	0.112	7.279	0	-0.5291	-1.697	0.638	0.596	-0.888	0.374	0.0592
Amblyopia	sense organs	1.584	-0.538	3.706	1.083	1.463	4.87441	0.583915	40.6907	10	5541	10	2454	0.143406	0.427735	not_significant	0.687922	0.843432	2.7264	1.532	3.921	0.609	4.475	0	-0.0467	-0.053	-0.04	0.003	-14.104	0	0.8167	0.633	1.001	0.094	8.696	0	0.8066	0.587	1.026	0.112	7.215	0	-0.5211	-1.688	0.646	0.595	-0.875	0.381	0.0673
Anal and rectal conditions	digestive	0.5673	0.152	0.982	0.212	2.68	1.7635	1.16416	2.66979	124	5427	31	2433	0.00736042	0.0739441	not_significant	0.246375	2.1331	2.7152	1.518	3.912	0.611	4.445	0	-0.0467	-0.053	-0.04	0.003	-14.112	0	0.8165	0.632	1.001	0.094	8.691	0	0.8081	0.589	1.027	0.112	7.229	0	-0.5144	-1.684	0.655	0.597	-0.862	0.389	0.0682
Anal and rectal polyp	digestive	0.2194	-0.329	0.768	0.28	0.784	1.24533	0.719643	2.15545	39	5512	22	2442	0.432917	0.694375	not_significant	0.0952842	0.363596	2.7297	1.535	3.924	0.609	4.479	0	-0.0467	-0.053	-0.04	0.003	-14.104	0	0.818	0.634	1.002	0.094	8.71	0	0.8094	0.59	1.028	0.112	7.239	0	-0.5219	-1.689	0.645	0.595	-0.877	0.381	0.0658
Anaphylactic shock NOS	injuries & poisonings	0.7505	-0.392	1.893	0.583	1.287	2.11806	0.675704	6.63926	14	5537	10	2454	0.198024	0.48582	not_significant	0.325938	0.703282	2.7252	1.531	3.919	0.609	4.473	0	-0.0466	-0.053	-0.04	0.003	-14.094	0	0.8174	0.633	1.001	0.094	8.703	0	0.8089	0.59	1.028	0.112	7.236	0	-0.5217	-1.689	0.645	0.595	-0.876	0.381	0.0667
Anemia in chronic kidney disease	hematopoietic	2.7798	0.708	4.852	1.057	2.63	16.1158	2.02993	127.996	18	5533	10	2454	0.00854983	0.0821561	not_significant	1.20725	2.06804	2.7504	1.555	3.946	0.61	4.51	0	-0.0473	-0.054	-0.041	0.003	-14.241	0	0.821	0.637	1.005	0.094	8.731	0	0.8117	0.592	1.031	0.112	7.257	0	-0.5229	-1.691	0.645	0.596	-0.878	0.38	0.0606
Anemia in neoplastic disease	hematopoietic	0.8584	-0.481	2.198	0.683	1.256	2.35938	0.618165	9.00698	12	5539	10	2454	0.209062	0.49995	not_significant	0.372798	0.679726	2.7265	1.532	3.921	0.609	4.474	0	-0.0467	-0.053	-0.04	0.003	-14.111	0	0.8197	0.636	1.004	0.094	8.725	0	0.811	0.592	1.03	0.112	7.252	0	-0.5229	-1.69	0.644	0.595	-0.878	0.38	0.0645
Anemia of chronic disease	hematopoietic	1.2568	0.136	2.377	0.572	2.199	3.51416	1.14568	10.7725	21	5530	10	2454	0.0278951	0.175507	not_significant	0.545821	1.55447	2.7325	1.538	3.927	0.609	4.483	0	-0.0468	-0.053	-0.04	0.003	-14.135	0	0.8188	0.635	1.003	0.094	8.715	0	0.8108	0.592	1.03	0.112	7.251	0	-0.5228	-1.69	0.644	0.595	-0.878	0.38	0.0641
Aneurysm and dissection of heart	circulatory system	-1.7552	-4.894	1.383	1.601	-1.096	0.172873	0.0074914	3.98684	10	5541	10	2454	0.273009	0.570298	not_significant	-0.762274	0.563823	2.7222	1.528	3.916	0.609	4.468	0	-0.0466	-0.053	-0.04	0.003	-14.092	0	0.8197	0.636	1.004	0.094	8.726	0	0.8077	0.589	1.027	0.112	7.226	0	-0.519	-1.686	0.648	0.595	-0.872	0.383	0.0672
Angina pectoris	circulatory system	0.0748	-0.65	0.8	0.37	0.202	1.07767	0.522046	2.22554	24	5527	13	2451	0.839657	0.933462	not_significant	0.0324852	0.0758983	2.7242	1.53	3.918	0.609	4.471	0	-0.0466	-0.053	-0.04	0.003	-14.075	0	0.8181	0.634	1.002	0.094	8.712	0	0.808	0.589	1.027	0.112	7.229	0	-0.5204	-1.687	0.646	0.595	-0.874	0.382	0.0664
Anisometropia	sense organs	-0.0994	-1.27	1.071	0.597	-0.166	0.90538	0.280832	2.9183	10	5541	10	2454	0.867832	0.947222	not_significant	-0.0431689	0.0615642	2.7219	1.528	3.916	0.609	4.467	0	-0.0466	-0.053	-0.04	0.003	-14.072	0	0.818	0.634	1.002	0.094	8.709	0	0.8079	0.589	1.027	0.112	7.228	0	-0.5202	-1.687	0.647	0.595	-0.874	0.382	0.0673
Ankylosing spondylitis	musculoskeletal	-0.478	-2.413	1.457	0.987	-0.484	0.620022	0.0895463	4.29306	10	5541	10	2454	0.628233	0.805877	not_significant	-0.207593	0.201879	2.7224	1.528	3.917	0.609	4.468	0	-0.0466	-0.053	-0.04	0.003	-14.085	0	0.8184	0.634	1.002	0.094	8.714	0	0.808	0.589	1.027	0.112	7.229	0	-0.5203	-1.687	0.647	0.595	-0.874	0.382	0.0675
Ankylosis of joint	musculoskeletal	0.319	-1.44	2.078	0.898	0.355	1.37575	0.236928	7.98848	10	5541	10	2454	0.722301	0.870549	not_significant	0.13854	0.141282	2.723	1.529	3.917	0.609	4.469	0	-0.0466	-0.053	-0.04	0.003	-14.089	0	0.8184	0.634	1.002	0.094	8.714	0	0.8085	0.589	1.028	0.112	7.232	0	-0.5208	-1.688	0.646	0.595	-0.875	0.382	0.0669
Anomalies of endocrine glands, congenital	congenital anomalies	-1.0702	-3.943	1.803	1.466	-0.73	0.34294	0.01939	6.06782	10	5541	10	2454	0.4653	0.721147	not_significant	-0.464782	0.332267	2.7225	1.528	3.917	0.609	4.468	0	-0.0466	-0.053	-0.04	0.003	-14.086	0	0.8183	0.634	1.002	0.094	8.714	0	0.808	0.589	1.027	0.112	7.229	0	-0.5203	-1.687	0.647	0.595	-0.874	0.382	0.0678
Anomalies of jaw size/symmetry	digestive	0.2901	-0.793	1.373	0.553	0.525	1.33656	0.452485	3.94717	12	5539	10	2454	0.599509	0.787181	not_significant	0.125989	0.222204	2.723	1.529	3.917	0.609	4.469	0	-0.0466	-0.053	-0.04	0.003	-14.09	0	0.8187	0.635	1.003	0.094	8.717	0	0.8084	0.589	1.028	0.112	7.232	0	-0.5207	-1.688	0.646	0.595	-0.875	0.382	0.0661
Anomalies of pupillary function	sense organs	-0.2557	-1.61	1.098	0.691	-0.37	0.774374	0.199888	2.99816	10	5541	10	2454	0.711308	0.861228	not_significant	-0.111049	0.147943	2.7226	1.528	3.917	0.609	4.469	0	-0.0466	-0.053	-0.04	0.003	-14.086	0	0.8182	0.634	1.002	0.094	8.712	0	0.8076	0.589	1.027	0.112	7.225	0	-0.5199	-1.687	0.647	0.595	-0.873	0.382	0.067
Anomalies of respiratory system, congenital	congenital anomalies	0.8063	-1.544	3.157	1.199	0.672	2.23961	0.213525	23.5	10	5541	10	2454	0.501426	0.736121	not_significant	0.350172	0.299793	2.725	1.531	3.919	0.609	4.472	0	-0.0466	-0.053	-0.04	0.003	-14.098	0	0.818	0.634	1.002	0.094	8.71	0	0.808	0.589	1.027	0.112	7.229	0	-0.5205	-1.687	0.646	0.595	-0.874	0.382	0.0658
Anomalies of tooth position/malocclusion	digestive	0.1931	-1.527	1.914	0.878	0.22	1.213	0.217186	6.78016	10	5541	10	2454	0.825887	0.927697	not_significant	0.0838623	0.0830794	2.7219	1.528	3.916	0.609	4.467	0	-0.0466	-0.053	-0.04	0.003	-14.081	0	0.8186	0.634	1.003	0.094	8.715	0	0.8085	0.589	1.028	0.112	7.231	0	-0.5206	-1.687	0.646	0.595	-0.874	0.382	0.0668
Anomalous atrioventricular excitation	circulatory system	0.3574	-1.868	2.583	1.135	0.315	1.42961	0.154432	13.2368	10	5541	10	2454	0.752916	0.892188	not_significant	0.155217	0.123254	2.7219	1.528	3.916	0.609	4.467	0	-0.0466	-0.053	-0.04	0.003	-14.082	0	0.8185	0.634	1.003	0.094	8.715	0	0.8082	0.589	1.027	0.112	7.23	0	-0.5206	-1.687	0.646	0.595	-0.875	0.382	0.0665
Anorexia	endocrine/metabolic	1.1891	-0.09	2.468	0.653	1.822	3.28412	0.913931	11.7988	19	5532	10	2454	0.0684369	0.304228	not_significant	0.51642	1.16471	2.7272	1.533	3.921	0.609	4.476	0	-0.0467	-0.053	-0.04	0.003	-14.114	0	0.8169	0.633	1.001	0.094	8.696	0	0.8094	0.59	1.029	0.112	7.239	0	-0.5224	-1.689	0.644	0.595	-0.877	0.38	0.065
Anticoagulants causing adverse effects	injuries & poisonings	0.8973	-1.607	3.402	1.278	0.702	2.45297	0.200488	30.0241	10	5541	10	2454	0.482577	0.729925	not_significant	0.389692	0.316434	2.7263	1.532	3.921	0.609	4.474	0	-0.0467	-0.053	-0.04	0.003	-14.101	0	0.818	0.634	1.002	0.094	8.709	0	0.808	0.589	1.027	0.112	7.228	0	-0.5205	-1.687	0.646	0.595	-0.874	0.382	0.0669
Antineoplastic and immunosuppressive drugs causing adverse effects	injuries & poisonings	-0.0956	-1.241	1.05	0.585	-0.164	0.908827	0.289095	2.85765	10	5541	10	2454	0.870089	0.947222	not_significant	-0.0415186	0.0604364	2.7225	1.528	3.917	0.609	4.468	0	-0.0466	-0.053	-0.04	0.003	-14.086	0	0.8181	0.634	1.002	0.094	8.711	0	0.8079	0.589	1.027	0.112	7.228	0	-0.5201	-1.687	0.647	0.595	-0.874	0.382	0.0672
Anxiety disorder	mental disorders	0.1874	-0.078	0.453	0.135	1.383	1.20611	0.924964	1.57302	209	5342	88	2376	0.16659	0.455917	not_significant	0.0813868	0.778351	2.7184	1.523	3.914	0.61	4.457	0	-0.0466	-0.053	-0.04	0.003	-14.09	0	0.8191	0.635	1.003	0.094	8.721	0	0.8118	0.593	1.031	0.112	7.26	0	-0.5207	-1.689	0.647	0.596	-0.874	0.382	0.0655
Anxiety disorders	mental disorders	0.7602	-1.403	2.923	1.104	0.689	2.1387	0.245858	18.597	10	5541	10	2454	0.49096	0.729925	not_significant	0.330151	0.308954	2.7218	1.528	3.916	0.609	4.467	0	-0.0466	-0.053	-0.04	0.003	-14.077	0	0.8174	0.633	1.001	0.094	8.704	0	0.8079	0.589	1.027	0.112	7.228	0	-0.5206	-1.687	0.646	0.595	-0.875	0.382	0.0671
Aortic aneurysm	circulatory system	0.8379	-0.222	1.898	0.541	1.549	2.31151	0.800915	6.67254	15	5536	10	2454	0.121339	0.393958	not_significant	0.363895	0.915999	2.7317	1.537	3.926	0.609	4.482	0	-0.0468	-0.053	-0.04	0.003	-14.133	0	0.8173	0.633	1.001	0.094	8.701	0	0.806	0.587	1.025	0.112	7.21	0	-0.5205	-1.687	0.647	0.595	-0.874	0.382	0.0664
Aortic ectasia	circulatory system	0.0201	-0.73	0.77	0.383	0.053	1.0203	0.481909	2.15977	20	5531	12	2452	0.95808	0.980443	not_significant	0.00872932	0.0185982	2.7228	1.529	3.917	0.609	4.469	0	-0.0466	-0.053	-0.04	0.003	-14.081	0	0.8181	0.634	1.002	0.094	8.711	0	0.8079	0.589	1.027	0.112	7.227	0	-0.5203	-1.687	0.646	0.595	-0.874	0.382	0.067
Aphasia	mental disorders	2.116	0.009	4.223	1.075	1.968	8.29788	1.00904	68.2379	10	5541	10	2454	0.0490256	0.252674	not_significant	0.918967	1.30958	2.7339	1.539	3.929	0.61	4.484	0	-0.0469	-0.053	-0.04	0.003	-14.159	0	0.8227	0.638	1.007	0.094	8.751	0	0.8106	0.591	1.03	0.112	7.248	0	-0.5232	-1.691	0.644	0.596	-0.878	0.38	0.0641
Aphasia/speech disturbance	mental disorders	1.5613	0.303	2.82	0.642	2.431	4.76501	1.35391	16.7769	20	5531	10	2454	0.0150512	0.117845	not_significant	0.678064	1.82243	2.7055	1.503	3.908	0.613	4.411	0	-0.047	-0.054	-0.041	0.003	-14.187	0	0.8174	0.633	1.002	0.094	8.698	0	0.8093	0.59	1.029	0.112	7.236	0	-0.4879	-1.663	0.687	0.6	-0.814	0.416	0.101
Aplastic anemia	hematopoietic	0.2392	-1.471	1.95	0.873	0.274	1.27023	0.229696	7.02869	10	5541	10	2454	0.784057	0.909999	not_significant	0.103883	0.105652	2.7225	1.528	3.917	0.609	4.468	0	-0.0466	-0.053	-0.04	0.003	-14.086	0	0.8184	0.634	1.002	0.094	8.713	0	0.8086	0.589	1.028	0.112	7.232	0	-0.5209	-1.688	0.646	0.595	-0.875	0.382	0.0669
Apnea	respiratory	0.0174	-0.972	1.007	0.505	0.034	1.01755	0.378326	2.73738	15	5536	10	2454	0.972505	0.986118	not_significant	0.00755672	0.0121082	2.7225	1.528	3.917	0.609	4.468	0	-0.0466	-0.053	-0.04	0.003	-14.085	0	0.8182	0.634	1.002	0.094	8.712	0	0.808	0.589	1.027	0.112	7.228	0	-0.5204	-1.687	0.646	0.595	-0.874	0.382	0.067
Appendiceal conditions	digestive	0.3931	-2.088	2.874	1.266	0.311	1.48157	0.123935	17.7077	10	5541	10	2454	0.756141	0.894543	not_significant	0.170721	0.121397	2.7236	1.529	3.918	0.609	4.47	0	-0.0466	-0.053	-0.04	0.003	-14.09	0	0.8179	0.634	1.002	0.094	8.708	0	0.808	0.589	1.027	0.112	7.229	0	-0.5206	-1.687	0.646	0.595	-0.874	0.382	0.0671
Arrhythmia (cardiac) NOS	circulatory system	0.7004	0.129	1.272	0.292	2.403	2.01456	1.13769	3.56798	52	5499	18	2446	0.0162755	0.123764	not_significant	0.30418	1.78847	2.74	1.545	3.935	0.61	4.494	0	-0.047	-0.054	-0.041	0.003	-14.188	0	0.8221	0.638	1.006	0.094	8.749	0	0.8134	0.594	1.033	0.112	7.274	0	-0.5249	-1.693	0.643	0.596	-0.881	0.378	0.0602
Arterial dissection	circulatory system	1.1116	-1.052	3.275	1.104	1.007	3.03922	0.349239	26.4432	10	5541	10	2454	0.313908	0.590393	not_significant	0.482762	0.503198	2.7238	1.53	3.918	0.609	4.471	0	-0.0466	-0.053	-0.04	0.003	-14.093	0	0.8177	0.634	1.002	0.094	8.707	0	0.808	0.589	1.027	0.112	7.228	0	-0.5204	-1.687	0.646	0.595	-0.874	0.382	0.0665
Arterial embolism and thrombosis	circulatory system	0.6245	-1.57	2.819	1.12	0.558	1.86731	0.208045	16.7601	10	5541	10	2454	0.577	0.776965	not_significant	0.271217	0.238824	2.7205	1.526	3.915	0.609	4.465	0	-0.0465	-0.053	-0.04	0.003	-14.068	0	0.8181	0.634	1.002	0.094	8.711	0	0.8071	0.588	1.026	0.112	7.22	0	-0.5199	-1.687	0.647	0.595	-0.873	0.382	0.0672
Arthralgia/ankylosis of temporomandibular joint	digestive	0.4976	-0.555	1.55	0.537	0.927	1.64477	0.574072	4.71147	18	5533	10	2454	0.35411	0.626959	not_significant	0.216105	0.450861	2.7226	1.528	3.917	0.609	4.468	0	-0.0466	-0.053	-0.04	0.003	-14.091	0	0.8194	0.635	1.003	0.094	8.724	0	0.8092	0.59	1.028	0.112	7.239	0	-0.5214	-1.688	0.646	0.595	-0.876	0.381	0.0647
Arthropathy NOS	musculoskeletal	1.4361	0.533	2.339	0.461	3.118	4.20427	1.70404	10.3709	34	5517	10	2454	0.00181858	0.0304809	mi_significant	0.62369	2.74027	2.7453	1.55	3.941	0.61	4.502	0	-0.0472	-0.054	-0.041	0.003	-14.23	0	0.8225	0.638	1.007	0.094	8.745	0	0.8114	0.592	1.031	0.112	7.253	0	-0.5252	-1.693	0.643	0.596	-0.881	0.378	0.0605
Articular cartilage disorder	musculoskeletal	0.5229	-0.328	1.374	0.434	1.204	1.68691	0.720363	3.95112	20	5531	10	2454	0.2286	0.529892	not_significant	0.227093	0.640923	2.7275	1.533	3.922	0.609	4.476	0	-0.0467	-0.053	-0.04	0.003	-14.114	0	0.8192	0.635	1.003	0.094	8.722	0	0.8097	0.591	1.029	0.112	7.242	0	-0.5221	-1.689	0.645	0.595	-0.877	0.381	0.0652
Ascites (non malignant)	digestive	0.9337	-0.131	1.998	0.543	1.719	2.5439	0.877218	7.37429	15	5536	10	2454	0.0855828	0.33015	not_significant	0.405501	1.06761	2.7369	1.542	3.932	0.61	4.49	0	-0.0469	-0.053	-0.04	0.003	-14.163	0	0.8195	0.635	1.004	0.094	8.721	0	0.8107	0.592	1.03	0.112	7.25	0	-0.5228	-1.69	0.645	0.596	-0.878	0.38	0.0639
Aseptic necrosis of bone	musculoskeletal	1.932	-0.209	4.073	1.092	1.769	6.9033	0.811395	58.7329	10	5541	10	2454	0.0769726	0.317812	not_significant	0.839057	1.11366	2.7294	1.535	3.924	0.609	4.479	0	-0.0467	-0.053	-0.04	0.003	-14.126	0	0.8173	0.633	1.001	0.094	8.7	0	0.8063	0.587	1.025	0.112	7.211	0	-0.5206	-1.688	0.646	0.595	-0.874	0.382	0.0663
Aspergillosis	infectious diseases	0.9175	-1.353	3.188	1.158	0.792	2.50302	0.258464	24.2399	10	5541	10	2454	0.428265	0.688305	not_significant	0.398465	0.368288	2.725	1.531	3.919	0.609	4.472	0	-0.0466	-0.053	-0.04	0.003	-14.099	0	0.8179	0.634	1.002	0.094	8.708	0	0.808	0.589	1.027	0.112	7.228	0	-0.5205	-1.687	0.646	0.595	-0.874	0.382	0.0671
Asphyxia and hypoxemia		1.2414	0.124	2.359	0.57	2.177	3.46045	1.13202	10.5804	18	5533	10	2454	0.0295167	0.183524	not_significant	0.539133	1.52993	2.7363	1.542	3.931	0.61	4.489	0	-0.0469	-0.053	-0.04	0.003	-14.165	0	0.8195	0.635	1.004	0.094	8.719	0	0.8116	0.592	1.031	0.112	7.257	0	-0.5235	-1.691	0.644	0.596	-0.879	0.379	0.0644
Asthma	respiratory	0.6934	0.357	1.03	0.172	4.04	2.00051	1.42904	2.80107	172	5379	49	2415	5.34008e-05	0.00220903	mi_significant	0.30114	4.27245	2.7219	1.523	3.921	0.612	4.449	0	-0.0474	-0.054	-0.041	0.003	-14.283	0	0.8195	0.635	1.004	0.094	8.71	0	0.816	0.597	1.035	0.112	7.289	0	-0.5029	-1.674	0.668	0.598	-0.842	0.4	0.0841
Asthma with exacerbation	respiratory	0.3151	-0.139	0.77	0.232	1.359	1.3704	0.870228	2.15977	79	5472	28	2436	0.174294	0.460535	not_significant	0.136846	0.758718	2.7277	1.533	3.922	0.609	4.476	0	-0.0467	-0.053	-0.04	0.003	-14.113	0	0.8188	0.635	1.003	0.094	8.717	0	0.8111	0.592	1.03	0.112	7.254	0	-0.5249	-1.692	0.642	0.595	-0.882	0.378	0.0614
Astigmatism	sense organs	0.6922	0.188	1.196	0.257	2.693	1.99811	1.20683	3.30686	98	5453	20	2444	0.00707436	0.0719	not_significant	0.300619	2.15031	2.7312	1.537	3.925	0.609	4.483	0	-0.0467	-0.053	-0.04	0.003	-14.109	0	0.8119	0.628	0.996	0.094	8.64	0	0.8042	0.585	1.023	0.112	7.191	0	-0.5259	-1.692	0.641	0.595	-0.883	0.377	0.0568
Atherosclerosis	circulatory system	0.8873	-0.768	2.543	0.845	1.051	2.42856	0.46394	12.7178	10	5541	10	2454	0.293458	0.578862	not_significant	0.385349	0.532454	2.728	1.534	3.922	0.609	4.477	0	-0.0467	-0.053	-0.04	0.003	-14.114	0	0.8177	0.634	1.002	0.094	8.706	0	0.808	0.589	1.027	0.112	7.228	0	-0.5207	-1.688	0.646	0.595	-0.875	0.382	0.0659
Atherosclerosis of aorta	circulatory system	-1.695	-4.098	0.708	1.226	-1.383	0.183599	0.0166059	2.02993	10	5541	10	2454	0.166795	0.455917	not_significant	-0.736129	0.777818	2.7189	1.525	3.913	0.609	4.463	0	-0.0465	-0.053	-0.04	0.003	-14.058	0	0.8187	0.635	1.003	0.094	8.718	0	0.8079	0.589	1.027	0.112	7.229	0	-0.5201	-1.687	0.647	0.595	-0.874	0.382	0.0685
Atherosclerosis of native arteries of the extremities with intermittent claudication	circulatory system	-0.248	-2.26	1.764	1.027	-0.242	0.78036	0.10435	5.83573	10	5541	10	2454	0.809111	0.917861	not_significant	-0.107705	0.0919917	2.722	1.528	3.916	0.609	4.468	0	-0.0466	-0.053	-0.04	0.003	-14.081	0	0.8183	0.634	1.002	0.094	8.713	0	0.808	0.589	1.027	0.112	7.229	0	-0.5203	-1.687	0.647	0.595	-0.874	0.382	0.067
Atherosclerosis of the extremities	circulatory system	0.9592	-1.359	3.277	1.183	0.811	2.60961	0.256918	26.4962	10	5541	10	2454	0.417326	0.684163	not_significant	0.416575	0.379524	2.7255	1.531	3.92	0.609	4.473	0	-0.0466	-0.053	-0.04	0.003	-14.1	0	0.8179	0.634	1.002	0.094	8.709	0	0.808	0.589	1.027	0.112	7.228	0	-0.5205	-1.687	0.646	0.595	-0.874	0.382	0.067
Atopic/contact dermatitis due to other or unspecified	dermatologic	0.4215	0.179	0.664	0.124	3.406	1.52425	1.19602	1.94255	319	5232	98	2366	0.000658017	0.0158074	mi_significant	0.183055	3.18176	2.678	1.481	3.875	0.611	4.386	0	-0.0469	-0.053	-0.04	0.003	-14.172	0	0.8155	0.631	1	0.094	8.672	0	0.8133	0.594	1.033	0.112	7.267	0	-0.4787	-1.648	0.691	0.597	-0.802	0.422	0.1057
Atrial fibrillation	circulatory system	1.0817	0.504	1.659	0.294	3.673	2.94969	1.65533	5.25405	64	5487	16	2448	0.000239593	0.00744852	mi_significant	0.469776	3.62053	2.7816	1.586	3.977	0.61	4.559	0	-0.0479	-0.054	-0.041	0.003	-14.373	0	0.8114	0.627	0.996	0.094	8.632	0	0.8095	0.59	1.029	0.112	7.236	0	-0.5275	-1.695	0.64	0.596	-0.885	0.376	0.0599
Atrial flutter	circulatory system	2.4064	0.935	3.878	0.751	3.206	11.094	2.54721	48.3275	27	5524	10	2454	0.00134679	0.0249748	mi_significant	1.04509	2.8707	2.7693	1.574	3.965	0.61	4.54	0	-0.0477	-0.054	-0.041	0.003	-14.331	0	0.8145	0.63	0.999	0.094	8.667	0	0.809	0.59	1.028	0.112	7.232	0	-0.5241	-1.692	0.644	0.596	-0.88	0.379	0.0604
Atrioventricular [AV] block	circulatory system	0.4818	-1.436	2.4	0.978	0.492	1.61899	0.237877	11.0232	10	5541	10	2454	0.622462	0.801392	not_significant	0.209243	0.205887	2.7246	1.53	3.919	0.609	4.472	0	-0.0466	-0.053	-0.04	0.003	-14.095	0	0.8185	0.634	1.003	0.094	8.716	0	0.8086	0.589	1.028	0.112	7.234	0	-0.5208	-1.688	0.646	0.595	-0.875	0.382	0.0667
Atrioventricular block, complete	circulatory system	-0.9107	-2.513	0.692	0.818	-1.114	0.402243	0.0810248	1.99771	10	5541	10	2454	0.265382	0.567832	not_significant	-0.395512	0.576128	2.717	1.523	3.911	0.609	4.459	0	-0.0465	-0.053	-0.04	0.003	-14.046	0	0.8206	0.636	1.005	0.094	8.735	0	0.8075	0.588	1.027	0.112	7.224	0	-0.518	-1.685	0.649	0.595	-0.87	0.384	0.0667
Atrophic gastritis	digestive	0.568	-0.005	1.141	0.292	1.942	1.76473	0.995012	3.1299	60	5491	16	2448	0.052122	0.263603	not_significant	0.246679	1.28298	2.7239	1.53	3.918	0.609	4.47	0	-0.0466	-0.053	-0.04	0.003	-14.096	0	0.8204	0.636	1.004	0.094	8.733	0	0.8138	0.595	1.033	0.112	7.276	0	-0.5253	-1.692	0.642	0.595	-0.882	0.378	0.0591
Attention deficit hyperactivity disorder	mental disorders	-0.132	-0.792	0.528	0.337	-0.392	0.876341	0.452938	1.69554	26	5525	15	2449	0.695055	0.849333	not_significant	-0.0573269	0.157981	2.7235	1.529	3.918	0.609	4.47	0	-0.0466	-0.053	-0.04	0.003	-14.091	0	0.8181	0.634	1.002	0.094	8.711	0	0.8083	0.589	1.027	0.112	7.231	0	-0.5203	-1.687	0.646	0.595	-0.874	0.382	0.0675
Autism	mental disorders	-0.8145	-3.716	2.087	1.48	-0.55	0.442861	0.0243311	8.0607	10	5541	10	2454	0.582167	0.777941	not_significant	-0.353733	0.234952	2.7237	1.529	3.918	0.609	4.47	0	-0.0466	-0.053	-0.04	0.003	-14.094	0	0.8184	0.634	1.002	0.094	8.714	0	0.8081	0.589	1.027	0.112	7.229	0	-0.5204	-1.687	0.646	0.595	-0.874	0.382	0.0669
Back pain	symptoms	0.6501	0.423	0.877	0.116	5.619	1.91573	1.52653	2.40368	394	5157	111	2353	1.92372e-08	6.77791e-06	mi_significant	0.282335	7.71586	2.7405	1.541	3.94	0.612	4.478	0	-0.0478	-0.054	-0.041	0.003	-14.373	0	0.8196	0.635	1.004	0.094	8.701	0	0.8222	0.603	1.042	0.112	7.336	0	-0.5258	-1.697	0.646	0.598	-0.88	0.379	0.0631
Bacteremia	infectious diseases	0.2086	-0.847	1.264	0.539	0.387	1.23195	0.428699	3.53955	14	5537	10	2454	0.698524	0.850622	not_significant	0.0905938	0.155819	2.7226	1.528	3.917	0.609	4.468	0	-0.0466	-0.053	-0.04	0.003	-14.086	0	0.8182	0.634	1.002	0.094	8.712	0	0.8088	0.59	1.028	0.112	7.234	0	-0.5212	-1.688	0.646	0.595	-0.875	0.381	0.0664
Bacterial enteritis	infectious diseases	0.1857	-0.521	0.892	0.36	0.515	1.20406	0.593926	2.44	34	5517	11	2453	0.606361	0.790826	not_significant	0.0806485	0.217268	2.7223	1.528	3.916	0.609	4.468	0	-0.0466	-0.053	-0.04	0.003	-14.084	0	0.8182	0.634	1.002	0.094	8.712	0	0.8091	0.59	1.028	0.112	7.237	0	-0.5218	-1.689	0.645	0.595	-0.877	0.381	0.0656
Bacterial infection NOS	infectious diseases	1.0739	0.328	1.82	0.381	2.821	2.92677	1.38819	6.17186	41	5510	10	2454	0.00478096	0.0549291	not_significant	0.466389	2.32049	2.7383	1.544	3.933	0.61	4.492	0	-0.047	-0.053	-0.04	0.003	-14.165	0	0.8176	0.633	1.002	0.094	8.7	0	0.8076	0.588	1.027	0.112	7.221	0	-0.5242	-1.691	0.643	0.596	-0.88	0.379	0.0631
Bacterial pneumonia	respiratory	0.2988	-0.936	1.534	0.63	0.474	1.34824	0.392193	4.63669	10	5541	10	2454	0.635361	0.810574	not_significant	0.129767	0.19698	2.7231	1.529	3.917	0.609	4.469	0	-0.0466	-0.053	-0.04	0.003	-14.091	0	0.8181	0.634	1.002	0.094	8.711	0	0.8084	0.589	1.027	0.112	7.232	0	-0.5208	-1.688	0.646	0.595	-0.875	0.382	0.0667
Balanoposthitis	genitourinary	1.1398	-0.083	2.363	0.624	1.827	3.12614	0.920351	10.6228	26	5525	10	2454	0.0677491	0.303436	not_significant	0.495009	1.1691	2.7232	1.529	3.917	0.609	4.47	0	-0.0466	-0.053	-0.04	0.003	-14.083	0	0.8174	0.633	1.002	0.094	8.701	0	0.811	0.592	1.03	0.112	7.253	0	-0.5261	-1.693	0.641	0.595	-0.884	0.377	0.0627
Barrett's esophagus	digestive	0.9101	-0.421	2.241	0.679	1.34	2.48457	0.65639	9.40273	13	5538	10	2454	0.180176	0.469078	not_significant	0.395251	0.744304	2.7275	1.533	3.922	0.609	4.476	0	-0.0467	-0.053	-0.04	0.003	-14.116	0	0.8182	0.634	1.002	0.094	8.711	0	0.8083	0.589	1.027	0.112	7.23	0	-0.5214	-1.688	0.646	0.595	-0.876	0.381	0.0652
Basal cell carcinoma	neoplasms	0.3892	-0.132	0.911	0.266	1.462	1.4758	0.876341	2.48681	43	5508	23	2441	0.143658	0.427735	not_significant	0.169027	0.842671	2.7355	1.541	3.93	0.61	4.488	0	-0.0469	-0.053	-0.04	0.003	-14.145	0	0.8174	0.633	1.001	0.094	8.701	0	0.8069	0.588	1.026	0.112	7.217	0	-0.5224	-1.689	0.645	0.595	-0.877	0.38	0.0668
Benign neoplasm of adrenal gland	neoplasms	1.2647	-0.9	3.43	1.105	1.145	3.54203	0.40657	30.8766	10	5541	10	2454	0.252223	0.556818	not_significant	0.549252	0.598216	2.7254	1.531	3.92	0.609	4.473	0	-0.0466	-0.053	-0.04	0.003	-14.096	0	0.8167	0.633	1.001	0.094	8.695	0	0.8081	0.589	1.027	0.112	7.229	0	-0.5214	-1.688	0.645	0.595	-0.876	0.381	0.0669
Benign neoplasm of bone and articular cartilage	neoplasms	0.3632	-1.043	1.77	0.718	0.506	1.43792	0.352396	5.87085	10	5541	10	2454	0.612709	0.794642	not_significant	0.157736	0.212746	2.7243	1.53	3.919	0.609	4.471	0	-0.0466	-0.053	-0.04	0.003	-14.093	0	0.8177	0.634	1.002	0.094	8.707	0	0.808	0.589	1.027	0.112	7.229	0	-0.5206	-1.687	0.646	0.595	-0.874	0.382	0.0667
Benign neoplasm of brain, cranial nerves, meninges	neoplasms	1.1484	-0.401	2.698	0.791	1.452	3.15314	0.66965	14.85	11	5540	10	2454	0.146427	0.428331	not_significant	0.498744	0.834379	2.7273	1.533	3.922	0.609	4.476	0	-0.0467	-0.053	-0.04	0.003	-14.114	0	0.8182	0.634	1.002	0.094	8.71	0	0.8096	0.59	1.029	0.112	7.241	0	-0.5221	-1.689	0.645	0.595	-0.877	0.381	0.0651
Benign neoplasm of colon	neoplasms	0.0704	-0.14	0.281	0.107	0.656	1.07294	0.869358	1.32445	285	5266	163	2301	0.511948	0.743868	not_significant	0.0305743	0.290775	2.7365	1.541	3.932	0.61	4.488	0	-0.0469	-0.053	-0.04	0.003	-14.031	0	0.8166	0.632	1.001	0.094	8.692	0	0.8089	0.59	1.028	0.112	7.235	0	-0.5236	-1.691	0.643	0.595	-0.879	0.379	0.0635
Benign neoplasm of eye, uveal	neoplasms	0.5798	-0.609	1.768	0.606	0.956	1.78568	0.543894	5.85912	11	5540	10	2454	0.338952	0.613481	not_significant	0.251804	0.469861	2.7251	1.531	3.919	0.609	4.472	0	-0.0467	-0.053	-0.04	0.003	-14.102	0	0.8191	0.635	1.003	0.094	8.719	0	0.8096	0.59	1.029	0.112	7.241	0	-0.5215	-1.688	0.645	0.595	-0.876	0.381	0.0655
Benign neoplasm of kidney and other urinary organs	neoplasms	0.2651	-2.31	2.84	1.314	0.202	1.30356	0.0992613	17.1158	10	5541	10	2454	0.840134	0.933462	not_significant	0.115131	0.0756515	2.7232	1.529	3.917	0.609	4.469	0	-0.0466	-0.053	-0.04	0.003	-14.087	0	0.8181	0.634	1.002	0.094	8.711	0	0.808	0.589	1.027	0.112	7.228	0	-0.5203	-1.687	0.646	0.595	-0.874	0.382	0.0669
Benign neoplasm of other parts of digestive system	neoplasms	0.0461	-0.683	0.776	0.372	0.124	1.04718	0.505099	2.17276	23	5528	12	2452	0.901433	0.957603	not_significant	0.020021	0.0450666	2.7228	1.529	3.917	0.609	4.469	0	-0.0466	-0.053	-0.04	0.003	-14.087	0	0.8183	0.634	1.002	0.094	8.713	0	0.8082	0.589	1.027	0.112	7.229	0	-0.5205	-1.687	0.646	0.595	-0.874	0.382	0.0668
Benign neoplasm of pituitary gland and craniopharyngeal duct (pouch)	neoplasms	0.7472	-0.544	2.038	0.659	1.134	2.11108	0.580422	7.67524	14	5537	10	2454	0.256705	0.558306	not_significant	0.324505	0.590566	2.7232	1.529	3.917	0.609	4.47	0	-0.0466	-0.053	-0.04	0.003	-14.087	0	0.8172	0.633	1.001	0.094	8.702	0	0.8072	0.588	1.026	0.112	7.221	0	-0.5204	-1.687	0.646	0.595	-0.874	0.382	0.066
Benign neoplasm of respiratory and intrathoracic organs	neoplasms	0.1696	-1.249	1.588	0.724	0.234	1.18483	0.286791	4.89395	10	5541	10	2454	0.814764	0.921076	not_significant	0.0736563	0.0889681	2.7226	1.528	3.917	0.609	4.469	0	-0.0466	-0.053	-0.04	0.003	-14.086	0	0.8181	0.634	1.002	0.094	8.712	0	0.8082	0.589	1.027	0.112	7.23	0	-0.5205	-1.687	0.646	0.595	-0.874	0.382	0.067
Benign neoplasm of skin	neoplasms	0.3577	0.149	0.567	0.107	3.353	1.43004	1.16067	1.76297	369	5182	141	2323	0.000798431	0.0179562	mi_significant	0.155347	3.09776	2.7397	1.545	3.934	0.609	4.496	0	-0.0469	-0.053	-0.04	0.003	-14.173	0	0.8116	0.627	0.996	0.094	8.634	0	0.8022	0.583	1.021	0.112	7.172	0	-0.5331	-1.7	0.634	0.595	-0.895	0.371	0.055
Benign neoplasm of unspecified sites	neoplasms	-0.4037	-1.167	0.36	0.39	-1.036	0.667844	0.311299	1.43333	15	5536	14	2450	0.299981	0.581799	not_significant	-0.175325	0.522906	2.7183	1.524	3.912	0.609	4.462	0	-0.0465	-0.053	-0.04	0.003	-14.054	0	0.819	0.635	1.003	0.094	8.721	0	0.8074	0.588	1.026	0.112	7.224	0	-0.5194	-1.686	0.647	0.595	-0.872	0.383	0.0678
Bipolar	mental disorders	0.968	-0.139	2.075	0.565	1.714	2.63267	0.870228	7.96455	18	5533	10	2454	0.0865953	0.331635	not_significant	0.420397	1.06251	2.719	1.525	3.913	0.609	4.462	0	-0.0465	-0.053	-0.04	0.003	-14.063	0	0.8211	0.637	1.005	0.094	8.739	0	0.8109	0.592	1.03	0.112	7.253	0	-0.5222	-1.689	0.645	0.595	-0.877	0.38	0.0648
Bladder neck obstruction	genitourinary	0.742	-1.009	2.493	0.893	0.831	2.10013	0.364583	12.0975	10	5541	10	2454	0.40625	0.680918	not_significant	0.322247	0.391207	2.727	1.533	3.921	0.609	4.475	0	-0.0467	-0.053	-0.04	0.003	-14.109	0	0.8184	0.634	1.002	0.094	8.713	0	0.8092	0.59	1.028	0.112	7.238	0	-0.5217	-1.689	0.645	0.595	-0.876	0.381	0.0664
Blindness and low vision	sense organs	0.2359	-0.621	1.093	0.437	0.54	1.26605	0.537407	2.98321	22	5529	10	2454	0.589527	0.781845	not_significant	0.10245	0.229496	2.7225	1.528	3.917	0.609	4.468	0	-0.0466	-0.053	-0.04	0.003	-14.089	0	0.8194	0.635	1.004	0.094	8.723	0	0.8098	0.591	1.029	0.112	7.242	0	-0.5218	-1.689	0.645	0.595	-0.876	0.381	0.0653
Blister	injuries & poisonings	0.8494	-0.717	2.416	0.799	1.063	2.33824	0.488215	11.201	10	5541	10	2454	0.287739	0.578862	not_significant	0.36889	0.541001	2.7239	1.53	3.918	0.609	4.471	0	-0.0466	-0.053	-0.04	0.003	-14.09	0	0.8171	0.633	1.001	0.094	8.7	0	0.8088	0.59	1.028	0.112	7.235	0	-0.5219	-1.689	0.645	0.595	-0.877	0.381	0.0667
Blood in stool	digestive	0.6256	0.085	1.166	0.276	2.268	1.86937	1.08872	3.20913	67	5484	19	2445	0.0233126	0.154329	not_significant	0.271695	1.63241	2.7351	1.54	3.93	0.61	4.487	0	-0.0469	-0.053	-0.04	0.003	-14.166	0	0.8193	0.635	1.004	0.094	8.72	0	0.8081	0.589	1.027	0.112	7.226	0	-0.5231	-1.69	0.644	0.596	-0.878	0.38	0.058
Bone cancer	neoplasms	0.3807	-1.949	2.71	1.188	0.32	1.46331	0.142416	15.0293	10	5541	10	2454	0.748695	0.891037	not_significant	0.165336	0.125695	2.7222	1.528	3.916	0.609	4.468	0	-0.0466	-0.053	-0.04	0.003	-14.085	0	0.8186	0.634	1.003	0.094	8.715	0	0.8085	0.589	1.028	0.112	7.232	0	-0.5207	-1.688	0.646	0.595	-0.875	0.382	0.0667
Bone marrow or stem cell transplant	neoplasms	1.1392	-1.034	3.312	1.109	1.028	3.12427	0.355582	27.44	10	5541	10	2454	0.304151	0.582187	not_significant	0.494748	0.516911	2.7222	1.528	3.916	0.609	4.468	0	-0.0466	-0.053	-0.04	0.003	-14.073	0	0.8171	0.633	1.001	0.094	8.701	0	0.8079	0.589	1.027	0.112	7.228	0	-0.5207	-1.687	0.646	0.595	-0.875	0.382	0.0676
Broken tooth	injuries & poisonings	-0.2288	-1.959	1.501	0.883	-0.259	0.795488	0.140999	4.48617	10	5541	10	2454	0.795407	0.912242	not_significant	-0.0993666	0.0994104	2.7225	1.528	3.917	0.609	4.468	0	-0.0466	-0.053	-0.04	0.003	-14.087	0	0.8186	0.634	1.003	0.094	8.715	0	0.8079	0.589	1.027	0.112	7.228	0	-0.52	-1.687	0.647	0.595	-0.874	0.382	0.067
Bronchitis	respiratory	0.6472	-0.075	1.37	0.369	1.756	1.91018	0.927743	3.93535	39	5512	10	2454	0.0791657	0.320454	not_significant	0.281075	1.10146	2.7251	1.531	3.92	0.609	4.472	0	-0.0467	-0.053	-0.04	0.003	-14.105	0	0.8206	0.637	1.005	0.094	8.735	0	0.8102	0.591	1.029	0.112	7.245	0	-0.5246	-1.692	0.642	0.595	-0.881	0.378	0.0621
Bronchopneumonia and lung abscess	respiratory	0.0755	-1.829	1.98	0.972	0.078	1.07842	0.160574	7.24274	10	5541	10	2454	0.938074	0.97649	not_significant	0.0327892	0.0277631	2.7228	1.529	3.917	0.609	4.469	0	-0.0466	-0.053	-0.04	0.003	-14.085	0	0.8182	0.634	1.002	0.094	8.712	0	0.8079	0.589	1.027	0.112	7.227	0	-0.5203	-1.687	0.647	0.595	-0.874	0.382	0.067
Burns		0.5111	-0.647	1.67	0.591	0.865	1.66712	0.523614	5.31217	14	5537	10	2454	0.387177	0.662211	not_significant	0.221968	0.41209	2.7244	1.53	3.919	0.609	4.471	0	-0.0466	-0.053	-0.04	0.003	-14.095	0	0.8175	0.633	1.002	0.094	8.705	0	0.8079	0.589	1.027	0.112	7.228	0	-0.5204	-1.687	0.646	0.595	-0.874	0.382	0.0657
Bursitis	musculoskeletal	0.0542	-0.417	0.525	0.24	0.226	1.0557	0.659021	1.69046	62	5489	28	2436	0.82145	0.924678	not_significant	0.0235388	0.085419	2.7213	1.527	3.916	0.609	4.465	0	-0.0466	-0.053	-0.04	0.003	-14.088	0	0.8179	0.634	1.002	0.094	8.708	0	0.8081	0.589	1.027	0.112	7.229	0	-0.5186	-1.686	0.649	0.596	-0.871	0.384	0.0685
Bursitis disorders	musculoskeletal	-0.6464	-2.466	1.173	0.928	-0.696	0.523929	0.0849239	3.23167	10	5541	10	2454	0.486173	0.729925	not_significant	-0.280728	0.313209	2.7202	1.526	3.914	0.609	4.465	0	-0.0465	-0.053	-0.04	0.003	-14.065	0	0.818	0.634	1.002	0.094	8.71	0	0.8068	0.588	1.026	0.112	7.217	0	-0.519	-1.686	0.648	0.595	-0.872	0.383	0.0673
Calcaneal spur; Exostosis NOS	musculoskeletal	0.3297	-0.604	1.264	0.477	0.692	1.39055	0.546621	3.53955	17	5534	10	2454	0.489138	0.729925	not_significant	0.143187	0.310568	2.7266	1.532	3.921	0.609	4.475	0	-0.0467	-0.053	-0.04	0.003	-14.101	0	0.8173	0.633	1.001	0.094	8.701	0	0.8067	0.588	1.026	0.112	7.217	0	-0.5209	-1.688	0.646	0.595	-0.875	0.382	0.0665
Calculus of bile duct	digestive	0.6188	-0.416	1.653	0.528	1.172	1.8567	0.65968	5.22262	17	5534	10	2454	0.241012	0.542021	not_significant	0.268741	0.617961	2.7264	1.532	3.921	0.609	4.475	0	-0.0467	-0.053	-0.04	0.003	-14.104	0	0.8162	0.632	1	0.094	8.689	0	0.8075	0.588	1.027	0.112	7.224	0	-0.5215	-1.688	0.645	0.595	-0.876	0.381	0.0669
Calculus of kidney	genitourinary	0.3678	-0.061	0.797	0.219	1.681	1.44455	0.940823	2.21887	88	5463	32	2432	0.0927644	0.336948	not_significant	0.159734	1.03262	2.7362	1.542	3.931	0.609	4.49	0	-0.0469	-0.053	-0.04	0.003	-14.149	0	0.8151	0.631	0.999	0.094	8.676	0	0.8083	0.589	1.027	0.112	7.23	0	-0.5245	-1.691	0.642	0.595	-0.881	0.378	0.0625
Calculus of lower urinary tract	genitourinary	1.1901	-0.408	2.788	0.815	1.46	3.28741	0.664979	16.2485	10	5541	10	2454	0.144303	0.42817	not_significant	0.516854	0.840725	2.7323	1.538	3.927	0.609	4.483	0	-0.0468	-0.053	-0.04	0.003	-14.135	0	0.8179	0.634	1.002	0.094	8.707	0	0.8063	0.587	1.025	0.112	7.213	0	-0.5206	-1.688	0.646	0.595	-0.874	0.382	0.0649
Calculus of ureter	genitourinary	0.6578	-0.222	1.537	0.449	1.466	1.93054	0.800915	4.65062	24	5527	10	2454	0.142632	0.427735	not_significant	0.285679	0.845782	2.7271	1.533	3.921	0.609	4.476	0	-0.0467	-0.053	-0.04	0.003	-14.109	0	0.8175	0.633	1.002	0.094	8.702	0	0.8061	0.587	1.025	0.112	7.212	0	-0.5213	-1.688	0.646	0.595	-0.876	0.381	0.0655
Cancer of bladder	neoplasms	0.1413	-2.648	2.93	1.423	0.099	1.15177	0.0707927	18.7276	10	5541	10	2454	0.92091	0.968114	not_significant	0.0613658	0.035783	2.723	1.529	3.917	0.609	4.469	0	-0.0466	-0.053	-0.04	0.003	-14.084	0	0.8182	0.634	1.002	0.094	8.712	0	0.808	0.589	1.027	0.112	7.228	0	-0.5203	-1.687	0.646	0.595	-0.874	0.382	0.067
Cancer of brain	neoplasms	1.4864	-0.071	3.044	0.795	1.871	4.42115	0.931462	20.989	10	5541	10	2454	0.0613749	0.289553	not_significant	0.645535	1.21201	2.7342	1.54	3.929	0.609	4.486	0	-0.0469	-0.053	-0.04	0.003	-14.148	0	0.818	0.634	1.002	0.094	8.707	0	0.8092	0.59	1.028	0.112	7.237	0	-0.5219	-1.689	0.645	0.595	-0.876	0.381	0.066
Cancer of connective tissue	neoplasms	0.5903	-0.987	2.167	0.805	0.734	1.80453	0.372693	8.73205	10	5541	10	2454	0.46324	0.719008	not_significant	0.256364	0.334194	2.7214	1.527	3.916	0.609	4.467	0	-0.0466	-0.053	-0.04	0.003	-14.076	0	0.8182	0.634	1.002	0.094	8.712	0	0.8093	0.59	1.028	0.112	7.239	0	-0.5217	-1.688	0.645	0.595	-0.876	0.381	0.0669
Cancer of liver and intrahepatic bile duct	neoplasms	-1.4199	-4.388	1.548	1.514	-0.938	0.241738	0.0124256	4.70206	10	5541	10	2454	0.34837	0.622732	not_significant	-0.616655	0.457959	2.7242	1.53	3.918	0.609	4.471	0	-0.0466	-0.053	-0.04	0.003	-14.097	0	0.8184	0.634	1.003	0.094	8.715	0	0.8081	0.589	1.027	0.112	7.229	0	-0.5204	-1.687	0.646	0.595	-0.874	0.382	0.0677
Cancer of major salivary glands	neoplasms	-0.8372	-3.932	2.257	1.579	-0.53	0.432921	0.0196044	9.55438	10	5541	10	2454	0.595944	0.785423	not_significant	-0.363591	0.224795	2.7216	1.527	3.916	0.609	4.467	0	-0.0466	-0.053	-0.04	0.003	-14.078	0	0.8183	0.634	1.002	0.094	8.713	0	0.8079	0.589	1.027	0.112	7.228	0	-0.5202	-1.687	0.647	0.595	-0.874	0.382	0.0676
Cancer of prostate	neoplasms	1.4759	0.202	2.75	0.65	2.271	4.37497	1.22385	15.6426	13	5538	10	2454	0.0231586	0.154329	not_significant	0.640975	1.63529	2.7486	1.554	3.944	0.61	4.508	0	-0.0472	-0.054	-0.041	0.003	-14.214	0	0.8177	0.634	1.002	0.094	8.703	0	0.8046	0.585	1.024	0.112	7.196	0	-0.5213	-1.689	0.646	0.596	-0.875	0.382	0.065
Cancer of tongue	neoplasms	-0.4037	-3.402	2.595	1.53	-0.264	0.667844	0.0333066	13.3966	10	5541	10	2454	0.791884	0.911787	not_significant	-0.175325	0.101339	2.7217	1.528	3.916	0.609	4.467	0	-0.0466	-0.053	-0.04	0.003	-14.079	0	0.8185	0.634	1.003	0.094	8.715	0	0.8079	0.589	1.027	0.112	7.228	0	-0.52	-1.687	0.647	0.595	-0.874	0.382	0.0669
Cancer, suspected or other	neoplasms	1.9669	0.474	3.46	0.762	2.582	7.14848	1.60641	31.817	20	5531	10	2454	0.00980943	0.0909524	not_significant	0.854214	2.00836	2.7335	1.539	3.928	0.61	4.484	0	-0.0469	-0.053	-0.04	0.003	-14.154	0	0.822	0.638	1.006	0.094	8.744	0	0.8152	0.596	1.035	0.112	7.284	0	-0.526	-1.693	0.641	0.596	-0.883	0.377	0.0626
Candidiasis	infectious diseases	1.348	0.284	2.412	0.543	2.483	3.84972	1.32843	11.1563	33	5518	10	2454	0.013011	0.107442	not_significant	0.585429	1.88569	2.6912	1.49	3.893	0.613	4.391	0	-0.0467	-0.053	-0.04	0.003	-14.099	0	0.8207	0.636	1.005	0.094	8.73	0	0.8165	0.597	1.036	0.112	7.297	0	-0.4951	-1.669	0.679	0.599	-0.826	0.409	0.0948
Carbuncle and furuncle	dermatologic	0.4775	-0.463	1.418	0.48	0.995	1.61204	0.629393	4.12885	23	5528	10	2454	0.319666	0.596654	not_significant	0.207376	0.495303	2.7243	1.53	3.919	0.609	4.471	0	-0.0466	-0.053	-0.04	0.003	-14.095	0	0.8179	0.634	1.002	0.094	8.708	0	0.8082	0.589	1.027	0.112	7.23	0	-0.5209	-1.688	0.646	0.595	-0.875	0.382	0.0642
Carcinoma in situ of skin	neoplasms	0.3478	-0.912	1.607	0.643	0.541	1.41595	0.40172	4.98783	10	5541	10	2454	0.588388	0.781698	not_significant	0.151048	0.230336	2.7256	1.531	3.92	0.609	4.473	0	-0.0466	-0.053	-0.04	0.003	-14.095	0	0.8176	0.634	1.002	0.094	8.705	0	0.8076	0.588	1.027	0.112	7.224	0	-0.5207	-1.688	0.646	0.595	-0.875	0.382	0.0672
Cardiac complications, not elsewhere classified	circulatory system	-1.9624	-4.185	0.26	1.134	-1.731	0.140521	0.0152222	1.29693	10	5541	10	2454	0.0835103	0.325721	not_significant	-0.852259	1.07826	2.7174	1.523	3.912	0.609	4.459	0	-0.0465	-0.053	-0.04	0.003	-14.057	0	0.8219	0.638	1.006	0.094	8.747	0	0.8075	0.588	1.027	0.112	7.224	0	-0.5172	-1.684	0.65	0.595	-0.869	0.385	0.0654
Cardiac conduction disorders	circulatory system	0.4296	-1.187	2.046	0.825	0.521	1.53664	0.305135	7.73689	10	5541	10	2454	0.602503	0.789358	not_significant	0.186573	0.22004	2.7224	1.528	3.917	0.609	4.468	0	-0.0466	-0.053	-0.04	0.003	-14.083	0	0.8179	0.634	1.002	0.094	8.709	0	0.8079	0.589	1.027	0.112	7.228	0	-0.5203	-1.687	0.646	0.595	-0.874	0.382	0.0666
Cardiac congenital anomalies	congenital anomalies	1.2606	0.147	2.374	0.568	2.219	3.52754	1.15835	10.7403	26	5525	10	2454	0.0264665	0.167516	not_significant	0.547472	1.5773	2.7294	1.535	3.924	0.61	4.478	0	-0.0468	-0.053	-0.04	0.003	-14.135	0	0.8223	0.638	1.006	0.094	8.753	0	0.8124	0.593	1.032	0.112	7.266	0	-0.5234	-1.691	0.644	0.596	-0.879	0.38	0.0597
Cardiac shunt/ heart septal defect	congenital anomalies	0.6087	-0.674	1.891	0.654	0.93	1.83804	0.509666	6.62599	13	5538	10	2454	0.352395	0.626045	not_significant	0.264355	0.45297	2.7221	1.528	3.916	0.609	4.468	0	-0.0466	-0.053	-0.04	0.003	-14.081	0	0.8177	0.634	1.002	0.094	8.707	0	0.8074	0.588	1.026	0.112	7.223	0	-0.5212	-1.688	0.646	0.595	-0.876	0.381	0.0664
Cardiogenic shock	symptoms	0.6155	-1.858	3.089	1.262	0.488	1.85058	0.155984	21.9551	10	5541	10	2454	0.625834	0.803775	not_significant	0.267308	0.203541	2.724	1.53	3.918	0.609	4.471	0	-0.0466	-0.053	-0.04	0.003	-14.093	0	0.818	0.634	1.002	0.094	8.71	0	0.808	0.589	1.027	0.112	7.228	0	-0.5204	-1.687	0.646	0.595	-0.874	0.382	0.0671
Cardiomegaly	circulatory system	0.4612	-0.162	1.084	0.318	1.451	1.58598	0.850441	2.95648	39	5512	15	2449	0.146694	0.428331	not_significant	0.200297	0.833586	2.7322	1.538	3.927	0.609	4.483	0	-0.0468	-0.053	-0.04	0.003	-14.131	0	0.8165	0.632	1.001	0.094	8.692	0	0.8087	0.59	1.028	0.112	7.233	0	-0.5226	-1.69	0.644	0.595	-0.878	0.38	0.0651
Cataplexy and narcolepsy	neurological	-0.15	-1.956	1.656	0.921	-0.163	0.860708	0.141423	5.23832	10	5541	10	2454	0.870646	0.947222	not_significant	-0.0651442	0.0601585	2.7228	1.529	3.917	0.609	4.469	0	-0.0466	-0.053	-0.04	0.003	-14.087	0	0.8183	0.634	1.002	0.094	8.713	0	0.808	0.589	1.027	0.112	7.229	0	-0.5203	-1.687	0.647	0.595	-0.874	0.382	0.067
Cataract	sense organs	1.6572	0.901	2.413	0.386	4.298	5.24461	2.46206	11.1674	48	5503	10	2454	1.72687e-05	0.00137214	mi_significant	0.719713	4.76274	2.8176	1.619	4.016	0.611	4.608	0	-0.049	-0.056	-0.042	0.003	-14.576	0	0.8278	0.643	1.012	0.094	8.788	0	0.8098	0.59	1.029	0.112	7.237	0	-0.5339	-1.704	0.636	0.597	-0.894	0.371	0.0487
Celiac disease	digestive	0.6555	-0.962	2.273	0.825	0.794	1.92611	0.382128	9.70848	10	5541	10	2454	0.42701	0.688305	not_significant	0.28468	0.369562	2.7221	1.528	3.916	0.609	4.468	0	-0.0466	-0.053	-0.04	0.003	-14.085	0	0.819	0.635	1.003	0.094	8.719	0	0.8097	0.591	1.029	0.112	7.242	0	-0.5217	-1.689	0.645	0.595	-0.876	0.381	0.0664
Cellulitis and abscess of arm/hand	dermatologic	0.4932	-0.347	1.333	0.429	1.15	1.63755	0.706805	3.7924	23	5528	10	2454	0.24996	0.555714	not_significant	0.214194	0.602129	2.7231	1.529	3.917	0.609	4.469	0	-0.0466	-0.053	-0.04	0.003	-14.093	0	0.8183	0.634	1.002	0.094	8.712	0	0.8091	0.59	1.028	0.112	7.238	0	-0.5219	-1.689	0.645	0.595	-0.877	0.381	0.0661
Cellulitis and abscess of face/neck	dermatologic	-0.3217	-1.249	0.606	0.473	-0.68	0.724916	0.286791	1.83308	15	5536	10	2454	0.496616	0.734496	not_significant	-0.139713	0.303979	2.7229	1.529	3.917	0.609	4.469	0	-0.0466	-0.053	-0.04	0.003	-14.085	0	0.8175	0.633	1.002	0.094	8.704	0	0.8077	0.589	1.027	0.112	7.225	0	-0.5201	-1.687	0.647	0.595	-0.874	0.382	0.0694
Cellulitis and abscess of fingers/toes	dermatologic	0.5394	-0.017	1.096	0.284	1.9	1.71498	0.983144	2.99217	61	5490	18	2446	0.057377	0.2782	not_significant	0.234258	1.24126	2.7072	1.51	3.905	0.611	4.431	0	-0.0466	-0.053	-0.04	0.003	-14.105	0	0.8182	0.634	1.002	0.094	8.712	0	0.8104	0.591	1.029	0.112	7.248	0	-0.5063	-1.676	0.664	0.597	-0.848	0.396	0.0806
Cellulitis and abscess of foot, toe	dermatologic	0.7389	-1.828	3.306	1.31	0.564	2.09363	0.160735	27.2758	10	5541	10	2454	0.572676	0.775527	not_significant	0.3209	0.242091	2.7262	1.532	3.921	0.609	4.474	0	-0.0467	-0.053	-0.04	0.003	-14.097	0	0.8181	0.634	1.002	0.094	8.711	0	0.8081	0.589	1.027	0.112	7.229	0	-0.5205	-1.687	0.646	0.595	-0.874	0.382	0.0665
Cellulitis and abscess of leg, except foot	dermatologic	0.8813	0.144	1.619	0.376	2.342	2.41404	1.15488	5.04804	38	5513	10	2454	0.0191841	0.135902	not_significant	0.382744	1.71706	2.7422	1.547	3.937	0.61	4.498	0	-0.047	-0.054	-0.041	0.003	-14.191	0	0.8174	0.633	1.002	0.094	8.7	0	0.8062	0.587	1.025	0.112	7.211	0	-0.5242	-1.691	0.643	0.596	-0.88	0.379	0.0629
Cellulitis and abscess of oral soft tissues	digestive	-0.4828	-2.09	1.125	0.82	-0.589	0.617053	0.123687	3.08022	10	5541	10	2454	0.556078	0.765331	not_significant	-0.209677	0.254864	2.722	1.528	3.916	0.609	4.468	0	-0.0466	-0.053	-0.04	0.003	-14.079	0	0.8176	0.634	1.002	0.094	8.704	0	0.8074	0.588	1.027	0.112	7.223	0	-0.5201	-1.687	0.647	0.595	-0.874	0.382	0.0689
Cellulitis and abscess of trunk	dermatologic	0.4425	-0.57	1.455	0.517	0.857	1.55659	0.565525	4.28448	18	5533	10	2454	0.391675	0.666667	not_significant	0.192175	0.407074	2.7206	1.526	3.915	0.609	4.465	0	-0.0465	-0.053	-0.04	0.003	-14.073	0	0.8186	0.634	1.003	0.094	8.714	0	0.8095	0.59	1.029	0.112	7.241	0	-0.5215	-1.688	0.645	0.595	-0.876	0.381	0.0656
Central/nonobstroctive sleep apnea	neurological	0.3621	-0.656	1.38	0.519	0.697	1.43634	0.518923	3.9749	13	5538	10	2454	0.485666	0.729925	not_significant	0.157258	0.313663	2.7253	1.531	3.92	0.609	4.473	0	-0.0466	-0.053	-0.04	0.003	-14.099	0	0.8181	0.634	1.002	0.094	8.712	0	0.8082	0.589	1.027	0.112	7.23	0	-0.5208	-1.688	0.646	0.595	-0.875	0.382	0.0664
Cerebral artery occlusion, with cerebral infarction	circulatory system	1.1628	0.034	2.292	0.576	2.018	3.19888	1.03458	9.89471	20	5531	10	2454	0.04354	0.237455	not_significant	0.504998	1.36111	2.7426	1.548	3.937	0.61	4.499	0	-0.047	-0.054	-0.041	0.003	-14.184	0	0.8173	0.633	1.001	0.094	8.701	0	0.808	0.589	1.027	0.112	7.228	0	-0.5242	-1.692	0.643	0.596	-0.88	0.379	0.0622
Cerebral cysts	neurological	-1.4992	-3.192	0.194	0.864	-1.735	0.223309	0.0410896	1.2141	10	5541	10	2454	0.0826679	0.32363	not_significant	-0.651094	1.08266	2.7217	1.528	3.916	0.609	4.467	0	-0.0466	-0.053	-0.04	0.003	-14.076	0	0.8174	0.633	1.001	0.094	8.702	0	0.806	0.587	1.025	0.112	7.21	0	-0.5188	-1.686	0.648	0.595	-0.872	0.383	0.0688
Cerebral edema and compression of brain	neurological	1.1164	-0.169	2.402	0.656	1.702	3.05384	0.844509	11.0452	15	5536	10	2454	0.0886682	0.332018	not_significant	0.484846	1.05223	2.7287	1.534	3.923	0.609	4.478	0	-0.0467	-0.053	-0.04	0.003	-14.123	0	0.8189	0.635	1.003	0.094	8.717	0	0.8103	0.591	1.029	0.112	7.246	0	-0.5223	-1.689	0.645	0.595	-0.877	0.38	0.0642
Cerebrovascular disease	circulatory system	0.7829	-1.811	3.377	1.324	0.591	2.18781	0.163491	29.2828	10	5541	10	2454	0.554213	0.764785	not_significant	0.340009	0.256323	2.7255	1.531	3.92	0.609	4.473	0	-0.0466	-0.053	-0.04	0.003	-14.101	0	0.8181	0.634	1.002	0.094	8.711	0	0.8081	0.589	1.027	0.112	7.229	0	-0.5205	-1.687	0.646	0.595	-0.874	0.382	0.0662
Certain early complications of trauma or procedure	injuries & poisonings	0.9264	-1.218	3.071	1.094	0.847	2.5254	0.295821	21.5635	10	5541	10	2454	0.397178	0.670635	not_significant	0.40233	0.401014	2.7212	1.527	3.915	0.609	4.466	0	-0.0466	-0.053	-0.04	0.003	-14.077	0	0.8184	0.634	1.002	0.094	8.714	0	0.8083	0.589	1.027	0.112	7.231	0	-0.5216	-1.688	0.645	0.595	-0.876	0.381	0.0667
Cervical radiculitis	symptoms	0.217	-0.187	0.621	0.206	1.054	1.24234	0.829444	1.86079	95	5456	37	2427	0.291896	0.578862	not_significant	0.0942419	0.534772	2.7296	1.535	3.924	0.609	4.479	0	-0.0467	-0.053	-0.04	0.003	-14.117	0	0.817	0.633	1.001	0.094	8.698	0	0.8069	0.588	1.026	0.112	7.218	0	-0.523	-1.69	0.644	0.595	-0.878	0.38	0.0635
Cervicalgia	symptoms	0.5351	0.25	0.82	0.145	3.679	1.70762	1.28403	2.2705	236	5315	70	2394	0.000234256	0.00744852	mi_significant	0.232391	3.63031	2.7225	1.525	3.92	0.611	4.455	0	-0.0472	-0.054	-0.041	0.003	-14.243	0	0.818	0.634	1.002	0.094	8.702	0	0.8106	0.591	1.03	0.112	7.246	0	-0.5076	-1.678	0.662	0.597	-0.85	0.395	0.073
Changes in skin texture	dermatologic	0.9517	-0.353	2.256	0.666	1.43	2.59011	0.702577	9.54483	13	5538	10	2454	0.152756	0.440111	not_significant	0.413318	0.816003	2.7012	1.502	3.901	0.612	4.414	0	-0.0467	-0.053	-0.04	0.003	-14.116	0	0.8168	0.633	1.001	0.094	8.696	0	0.8067	0.588	1.026	0.112	7.216	0	-0.4931	-1.666	0.679	0.598	-0.824	0.41	0.094
Cholecystitis without cholelithiasis	digestive	0.8612	-0.261	1.984	0.573	1.504	2.366	0.770281	7.27177	17	5534	10	2454	0.13267	0.413614	not_significant	0.374014	0.877227	2.7261	1.532	3.92	0.609	4.475	0	-0.0466	-0.053	-0.04	0.003	-14.098	0	0.8155	0.631	1	0.094	8.681	0	0.8089	0.59	1.028	0.112	7.236	0	-0.5228	-1.69	0.644	0.595	-0.878	0.38	0.0674
Cholelithiasis	digestive	1.1718	0.404	1.94	0.392	2.99	3.2278	1.4978	6.95875	52	5499	10	2454	0.00279138	0.0388223	mi_significant	0.508906	2.55418	2.7324	1.538	3.927	0.609	4.484	0	-0.0468	-0.053	-0.04	0.003	-14.124	0	0.8152	0.631	0.999	0.094	8.674	0	0.8089	0.59	1.028	0.112	7.232	0	-0.5261	-1.693	0.641	0.595	-0.884	0.377	0.062
Cholelithiasis with other cholecystitis	digestive	0.3949	-0.637	1.427	0.526	0.75	1.48424	0.528877	4.16618	16	5535	10	2454	0.453159	0.711571	not_significant	0.171503	0.34375	2.7231	1.529	3.917	0.609	4.469	0	-0.0466	-0.053	-0.04	0.003	-14.087	0	0.8176	0.633	1.002	0.094	8.705	0	0.8085	0.589	1.028	0.112	7.232	0	-0.5211	-1.688	0.646	0.595	-0.875	0.381	0.0661
Cholesteatoma	sense organs	0.9495	-1.195	3.094	1.094	0.868	2.58442	0.302704	22.0652	10	5541	10	2454	0.385459	0.660341	not_significant	0.412363	0.414021	2.7214	1.527	3.916	0.609	4.467	0	-0.0466	-0.053	-0.04	0.003	-14.08	0	0.8186	0.635	1.003	0.094	8.716	0	0.8093	0.59	1.028	0.112	7.24	0	-0.5215	-1.688	0.645	0.595	-0.876	0.381	0.0659
Cholesterolosis of gallbladder	digestive	0.5545	-0.372	1.481	0.473	1.173	1.74107	0.689354	4.39734	26	5525	10	2454	0.240664	0.542021	not_significant	0.240816	0.618589	2.7236	1.53	3.918	0.609	4.471	0	-0.0466	-0.053	-0.04	0.003	-14.086	0	0.8162	0.632	1	0.094	8.69	0	0.8074	0.588	1.026	0.112	7.223	0	-0.5211	-1.688	0.646	0.595	-0.875	0.381	0.0654
Chondrocalcinosis	endocrine/metabolic	1.2178	-0.996	3.432	1.13	1.078	3.37974	0.369354	30.9385	10	5541	10	2454	0.280975	0.578058	not_significant	0.528884	0.551332	2.7266	1.532	3.921	0.609	4.474	0	-0.0467	-0.053	-0.04	0.003	-14.11	0	0.8192	0.635	1.003	0.094	8.721	0	0.8085	0.589	1.028	0.112	7.231	0	-0.5218	-1.689	0.645	0.595	-0.876	0.381	0.0663
Chondromalacia		0.4159	-0.955	1.786	0.699	0.595	1.51573	0.384812	5.96554	10	5541	10	2454	0.552003	0.7637	not_significant	0.180623	0.258059	2.7228	1.529	3.917	0.609	4.469	0	-0.0466	-0.053	-0.04	0.003	-14.087	0	0.8181	0.634	1.002	0.094	8.711	0	0.8084	0.589	1.027	0.112	7.231	0	-0.5207	-1.687	0.646	0.595	-0.875	0.382	0.0671
Chorioretinal scars	sense organs	-1.4361	-3.154	0.282	0.876	-1.639	0.237854	0.0426811	1.32578	10	5541	10	2454	0.1013	0.354583	not_significant	-0.62369	0.99439	2.717	1.523	3.911	0.609	4.46	0	-0.0465	-0.053	-0.04	0.003	-14.044	0	0.8191	0.635	1.003	0.094	8.722	0	0.81	0.591	1.029	0.112	7.245	0	-0.5198	-1.686	0.647	0.595	-0.873	0.383	0.068
Chromosomal anomalies and genetic disorders	congenital anomalies	-0.868	-3.308	1.572	1.245	-0.697	0.41979	0.0365893	4.81627	10	5541	10	2454	0.485604	0.729925	not_significant	-0.376968	0.313717	2.7211	1.527	3.915	0.609	4.466	0	-0.0465	-0.053	-0.04	0.003	-14.075	0	0.8185	0.634	1.003	0.094	8.715	0	0.808	0.589	1.027	0.112	7.229	0	-0.5202	-1.687	0.647	0.595	-0.874	0.382	0.067
Chronic airway obstruction	respiratory	1.1936	0.155	2.232	0.53	2.253	3.29894	1.16766	9.31848	22	5529	10	2454	0.0242318	0.157135	not_significant	0.518374	1.61562	2.7413	1.547	3.936	0.61	4.497	0	-0.047	-0.054	-0.041	0.003	-14.188	0	0.8166	0.632	1.001	0.094	8.691	0	0.8099	0.591	1.029	0.112	7.242	0	-0.5235	-1.691	0.644	0.596	-0.879	0.379	0.0645
Chronic bronchitis	respiratory	0.7766	-0.563	2.116	0.684	1.136	2.17407	0.569498	8.29788	10	5541	10	2454	0.255986	0.558306	not_significant	0.337273	0.591783	2.7254	1.531	3.92	0.609	4.473	0	-0.0466	-0.053	-0.04	0.003	-14.099	0	0.8178	0.634	1.002	0.094	8.707	0	0.8068	0.588	1.026	0.112	7.217	0	-0.5201	-1.687	0.647	0.595	-0.874	0.382	0.0671
Chronic dermatitis due to solar radiation	dermatologic	0.3842	-0.417	1.185	0.409	0.94	1.46844	0.659021	3.27069	18	5533	10	2454	0.347407	0.622732	not_significant	0.166856	0.459162	2.7313	1.537	3.926	0.609	4.482	0	-0.0468	-0.053	-0.04	0.003	-14.117	0	0.8168	0.633	1.001	0.094	8.695	0	0.8076	0.588	1.027	0.112	7.224	0	-0.5213	-1.688	0.646	0.595	-0.876	0.381	0.0669
Chronic fatigue syndrome	symptoms	0.2184	-0.698	1.135	0.468	0.467	1.24408	0.497579	3.11117	18	5533	10	2454	0.640498	0.812715	not_significant	0.0948499	0.193482	2.7227	1.529	3.917	0.609	4.469	0	-0.0466	-0.053	-0.04	0.003	-14.085	0	0.8179	0.634	1.002	0.094	8.71	0	0.8078	0.589	1.027	0.112	7.227	0	-0.5206	-1.687	0.646	0.595	-0.875	0.382	0.0666
Chronic graft-versus-host disease	infectious diseases	0.1293	-1.771	2.029	0.969	0.133	1.13803	0.170163	7.60648	10	5541	10	2454	0.893855	0.954348	not_significant	0.0561543	0.048733	2.7225	1.528	3.917	0.609	4.468	0	-0.0466	-0.053	-0.04	0.003	-14.086	0	0.8182	0.634	1.002	0.094	8.713	0	0.8081	0.589	1.027	0.112	7.23	0	-0.5205	-1.687	0.646	0.595	-0.874	0.382	0.067
Chronic hepatitis	infectious diseases	0.0783	-1.546	1.702	0.828	0.095	1.08145	0.213099	5.48491	10	5541	10	2454	0.924707	0.96914	not_significant	0.0340053	0.0339958	2.7229	1.529	3.917	0.609	4.469	0	-0.0466	-0.053	-0.04	0.003	-14.086	0	0.8181	0.634	1.002	0.094	8.71	0	0.8079	0.589	1.027	0.112	7.228	0	-0.5204	-1.687	0.646	0.595	-0.874	0.382	0.0669
Chronic kidney disease, Stage I or II	genitourinary	0.5932	-0.087	1.273	0.347	1.71	1.80977	0.916677	3.57155	38	5513	13	2451	0.0873249	0.332018	not_significant	0.257623	1.05886	2.7413	1.547	3.936	0.61	4.497	0	-0.047	-0.054	-0.041	0.003	-14.171	0	0.8163	0.632	1	0.094	8.689	0	0.8095	0.59	1.029	0.112	7.24	0	-0.5232	-1.69	0.644	0.596	-0.879	0.38	0.0628
Chronic Kidney Disease, Stage III	genitourinary	3.1859	1.136	5.236	1.046	3.046	24.189	3.11429	187.917	22	5529	10	2454	0.00232252	0.0345761	mi_significant	1.38362	2.63404	2.784	1.588	3.98	0.61	4.561	0	-0.048	-0.055	-0.041	0.003	-14.39	0	0.8155	0.631	1	0.094	8.675	0	0.8097	0.59	1.029	0.112	7.237	0	-0.525	-1.693	0.643	0.596	-0.881	0.378	0.0623
Chronic Kidney Disease, Stage IV	genitourinary	1.4631	-0.179	3.105	0.838	1.746	4.31933	0.836106	22.3092	10	5541	10	2454	0.0807591	0.321568	not_significant	0.635416	1.09281	2.7373	1.543	3.932	0.61	4.491	0	-0.0469	-0.053	-0.04	0.003	-14.166	0	0.8174	0.633	1.001	0.094	8.702	0	0.8083	0.589	1.027	0.112	7.229	0	-0.5213	-1.688	0.646	0.596	-0.875	0.381	0.0657
Chronic laryngitis	respiratory	-1.9757	-4.527	0.576	1.302	-1.517	0.138664	0.0108131	1.77891	10	5541	10	2454	0.129144	0.405713	not_significant	-0.858036	0.888927	2.7224	1.528	3.917	0.609	4.468	0	-0.0466	-0.053	-0.04	0.003	-14.088	0	0.82	0.636	1.004	0.094	8.73	0	0.8077	0.589	1.027	0.112	7.226	0	-0.519	-1.686	0.648	0.595	-0.872	0.383	0.0677
Chronic lymphocytic thyroiditis	endocrine/metabolic	1.0919	-0.419	2.603	0.771	1.417	2.97993	0.657704	13.5042	14	5537	10	2454	0.156547	0.44426	not_significant	0.474206	0.805354	2.7257	1.532	3.92	0.609	4.474	0	-0.0466	-0.053	-0.04	0.003	-14.092	0	0.8161	0.632	1	0.094	8.688	0	0.8058	0.587	1.025	0.112	7.209	0	-0.5218	-1.688	0.645	0.595	-0.876	0.381	0.0661
Chronic osteomyelitis	musculoskeletal	1.0506	-1.221	3.322	1.159	0.906	2.85937	0.294935	27.7157	10	5541	10	2454	0.364756	0.635168	not_significant	0.45627	0.437998	2.7248	1.531	3.919	0.609	4.472	0	-0.0466	-0.053	-0.04	0.003	-14.096	0	0.8174	0.633	1.001	0.094	8.703	0	0.808	0.589	1.027	0.112	7.228	0	-0.5208	-1.688	0.646	0.595	-0.875	0.382	0.0673
Chronic pain	neurological	0.0959	-0.088	0.28	0.094	1.024	1.10065	0.915761	1.32313	433	5118	204	2260	0.305866	0.582187	not_significant	0.0416488	0.514469	2.7282	1.533	3.923	0.61	4.475	0	-0.0469	-0.053	-0.04	0.003	-14.119	0	0.8189	0.635	1.003	0.094	8.719	0	0.81	0.591	1.029	0.112	7.245	0	-0.5219	-1.689	0.646	0.596	-0.876	0.381	0.0641
Chronic pain syndrome	neurological	1.3457	0.055	2.636	0.658	2.044	3.84087	1.05654	13.9573	15	5536	10	2454	0.0409727	0.228411	not_significant	0.58443	1.38751	2.7345	1.54	3.929	0.61	4.486	0	-0.0469	-0.053	-0.04	0.003	-14.148	0	0.8192	0.635	1.003	0.094	8.718	0	0.8117	0.592	1.031	0.112	7.258	0	-0.524	-1.691	0.643	0.596	-0.88	0.379	0.0647
Chronic pancreatitis	digestive	0.9073	-1.38	3.195	1.167	0.777	2.47762	0.251579	24.4102	10	5541	10	2454	0.436907	0.695498	not_significant	0.394035	0.359611	2.7237	1.53	3.918	0.609	4.47	0	-0.0466	-0.053	-0.04	0.003	-14.092	0	0.8176	0.634	1.002	0.094	8.706	0	0.808	0.589	1.027	0.112	7.229	0	-0.5207	-1.687	0.646	0.595	-0.875	0.382	0.0662
Chronic passive congestion of liver	digestive	-1.7555	-4.205	0.694	1.25	-1.405	0.172821	0.0149208	2.00171	10	5541	10	2454	0.160135	0.44426	not_significant	-0.762404	0.795513	2.7192	1.525	3.913	0.609	4.463	0	-0.0465	-0.053	-0.04	0.003	-14.061	0	0.8184	0.634	1.002	0.094	8.715	0	0.8078	0.589	1.027	0.112	7.227	0	-0.52	-1.687	0.647	0.595	-0.874	0.382	0.0705
Chronic pharyngitis and nasopharyngitis	respiratory	0.1753	-0.353	0.703	0.269	0.651	1.1916	0.702577	2.0198	52	5499	23	2441	0.515153	0.743868	not_significant	0.0761318	0.288063	2.7273	1.533	3.922	0.609	4.476	0	-0.0467	-0.053	-0.04	0.003	-14.1	0	0.8177	0.634	1.002	0.094	8.705	0	0.8091	0.59	1.028	0.112	7.237	0	-0.5221	-1.689	0.645	0.595	-0.877	0.381	0.0652
Chronic prostatitis	genitourinary	-0.0583	-1.472	1.356	0.721	-0.081	0.943367	0.229466	3.88064	10	5541	10	2454	0.935575	0.975648	not_significant	-0.0253194	0.0289212	2.7228	1.529	3.917	0.609	4.469	0	-0.0466	-0.053	-0.04	0.003	-14.086	0	0.8182	0.634	1.002	0.094	8.712	0	0.808	0.589	1.027	0.112	7.228	0	-0.5202	-1.687	0.647	0.595	-0.874	0.382	0.067
Chronic pulmonary heart disease	circulatory system	0.3074	-0.69	1.304	0.509	0.604	1.35988	0.501576	3.684	15	5536	10	2454	0.545617	0.758755	not_significant	0.133502	0.263112	2.724	1.53	3.918	0.609	4.471	0	-0.0466	-0.053	-0.04	0.003	-14.092	0	0.8178	0.634	1.002	0.094	8.708	0	0.8085	0.589	1.028	0.112	7.233	0	-0.521	-1.688	0.646	0.595	-0.875	0.381	0.0666
Chronic renal failure [CKD]	genitourinary	0.4509	-0.242	1.144	0.354	1.275	1.56972	0.785056	3.1393	31	5520	13	2451	0.202349	0.491684	not_significant	0.195823	0.693899	2.7345	1.54	3.929	0.609	4.487	0	-0.0469	-0.053	-0.04	0.003	-14.139	0	0.8173	0.633	1.001	0.094	8.701	0	0.8091	0.59	1.028	0.112	7.237	0	-0.5228	-1.69	0.644	0.595	-0.878	0.38	0.0649
Chronic sinusitis	respiratory	0.4437	0.077	0.81	0.187	2.371	1.55846	1.08004	2.24791	128	5423	42	2422	0.0177231	0.13054	not_significant	0.192696	1.75146	2.7275	1.533	3.922	0.609	4.475	0	-0.0467	-0.053	-0.04	0.003	-14.122	0	0.8208	0.637	1.005	0.094	8.732	0	0.8085	0.589	1.028	0.112	7.231	0	-0.5252	-1.692	0.642	0.595	-0.882	0.378	0.0566
Chronic tonsillitis and adenoiditis	respiratory	0.3396	-0.376	1.055	0.365	0.93	1.40439	0.686602	2.87198	30	5521	11	2453	0.352409	0.626045	not_significant	0.147486	0.452953	2.7067	1.51	3.903	0.61	4.435	0	-0.0466	-0.053	-0.04	0.003	-14.08	0	0.8183	0.634	1.002	0.094	8.712	0	0.8096	0.59	1.029	0.112	7.241	0	-0.5066	-1.676	0.662	0.596	-0.849	0.396	0.0809
Chronic ulcer of leg or foot	dermatologic	0.9342	-0.227	2.095	0.592	1.577	2.54518	0.796921	8.12544	15	5536	10	2454	0.114705	0.386124	not_significant	0.405718	0.940418	2.7342	1.54	3.929	0.609	4.486	0	-0.0468	-0.053	-0.04	0.003	-14.144	0	0.8167	0.633	1.001	0.094	8.695	0	0.8097	0.591	1.029	0.112	7.242	0	-0.5233	-1.69	0.644	0.595	-0.879	0.379	0.0656
Chronic ulcer of unspecified site	dermatologic	1.306	-0.84	3.452	1.095	1.193	3.69138	0.431711	31.5635	10	5541	10	2454	0.233029	0.534977	not_significant	0.567189	0.632589	2.7252	1.531	3.919	0.609	4.473	0	-0.0466	-0.053	-0.04	0.003	-14.097	0	0.8171	0.633	1.001	0.094	8.7	0	0.808	0.589	1.027	0.112	7.229	0	-0.5209	-1.688	0.646	0.595	-0.875	0.382	0.0667
Chronic venous insufficiency [CVI]	circulatory system	1.2239	0.293	2.155	0.475	2.577	3.40042	1.34044	8.62789	26	5525	10	2454	0.00997336	0.0916682	not_significant	0.531533	2.00116	2.7465	1.551	3.941	0.61	4.504	0	-0.0472	-0.054	-0.041	0.003	-14.22	0	0.8186	0.634	1.003	0.094	8.708	0	0.8116	0.592	1.031	0.112	7.255	0	-0.5254	-1.693	0.642	0.596	-0.882	0.378	0.0633
Circadian rhythm sleep disorder	neurological	0.0304	-0.611	0.672	0.327	0.093	1.03087	0.542808	1.95815	28	5523	16	2448	0.926047	0.96914	not_significant	0.0132026	0.033367	2.7228	1.529	3.917	0.609	4.469	0	-0.0466	-0.053	-0.04	0.003	-14.086	0	0.8181	0.634	1.002	0.094	8.711	0	0.8079	0.589	1.027	0.112	7.227	0	-0.5203	-1.687	0.646	0.595	-0.874	0.382	0.0669
Circulatory disease NEC	circulatory system	1.1601	-0.201	2.522	0.695	1.67	3.19025	0.817912	12.4535	11	5540	10	2454	0.0948823	0.338923	not_significant	0.503825	1.02281	2.737	1.542	3.932	0.609	4.491	0	-0.0469	-0.053	-0.04	0.003	-14.159	0	0.8163	0.632	1	0.094	8.689	0	0.8077	0.589	1.027	0.112	7.224	0	-0.5222	-1.689	0.645	0.595	-0.877	0.38	0.0667
Circumscribed scleroderma	dermatologic	-0.0744	-2.856	2.707	1.419	-0.052	0.9283	0.0574983	14.9843	10	5541	10	2454	0.958185	0.980443	not_significant	-0.0323115	0.0185505	2.7227	1.529	3.917	0.609	4.469	0	-0.0466	-0.053	-0.04	0.003	-14.086	0	0.8179	0.634	1.002	0.094	8.698	0	0.8078	0.589	1.027	0.112	7.221	0	-0.5202	-1.687	0.647	0.595	-0.874	0.382	0.0672
Cirrhosis of liver without mention of alcohol	digestive	2.112	0.585	3.639	0.779	2.71	8.26475	1.79499	38.0538	20	5531	10	2454	0.00672376	0.0703665	not_significant	0.91723	2.17239	2.7597	1.564	3.955	0.61	4.524	0	-0.0475	-0.054	-0.041	0.003	-14.284	0	0.8198	0.636	1.004	0.094	8.722	0	0.8121	0.593	1.031	0.112	7.261	0	-0.5247	-1.693	0.643	0.596	-0.88	0.379	0.0572
Colon cancer	neoplasms	1.4233	-0.683	3.53	1.075	1.324	4.1508	0.505099	34.124	10	5541	10	2454	0.185463	0.473962	not_significant	0.618131	0.731742	2.7279	1.534	3.922	0.609	4.477	0	-0.0467	-0.053	-0.04	0.003	-14.108	0	0.8176	0.633	1.002	0.094	8.705	0	0.8081	0.589	1.027	0.112	7.229	0	-0.5207	-1.688	0.646	0.595	-0.875	0.382	0.0643
Complex regional/central pain syndrome	neurological	-0.7697	-2.304	0.765	0.783	-0.983	0.463152	0.0998586	2.14899	10	5541	10	2454	0.32561	0.601096	not_significant	-0.334276	0.487303	2.7201	1.526	3.914	0.609	4.465	0	-0.0465	-0.053	-0.04	0.003	-14.065	0	0.8182	0.634	1.002	0.094	8.714	0	0.8087	0.59	1.028	0.112	7.235	0	-0.5204	-1.687	0.646	0.595	-0.874	0.382	0.0685
Complication due to other implant and internal device	injuries & poisonings	1.2897	0.006	2.573	0.655	1.97	3.6317	1.00602	13.1051	15	5536	10	2454	0.0488836	0.252674	not_significant	0.56011	1.31084	2.7331	1.538	3.928	0.61	4.484	0	-0.0468	-0.053	-0.04	0.003	-14.143	0	0.8192	0.635	1.003	0.094	8.717	0	0.8079	0.589	1.027	0.112	7.225	0	-0.5208	-1.688	0.646	0.596	-0.875	0.382	0.0641
Complication of internal orthopedic device	injuries & poisonings	-0.2395	-1.248	0.769	0.514	-0.466	0.787021	0.287078	2.15761	11	5540	10	2454	0.641458	0.812715	not_significant	-0.104014	0.192832	2.7224	1.528	3.917	0.609	4.468	0	-0.0466	-0.053	-0.04	0.003	-14.084	0	0.818	0.634	1.002	0.094	8.71	0	0.8079	0.589	1.027	0.112	7.228	0	-0.5203	-1.687	0.647	0.595	-0.874	0.382	0.0679
Complications of cardiac/vascular device, implant, and graft	injuries & poisonings	0.8942	-0.416	2.204	0.668	1.338	2.44538	0.65968	9.06119	12	5539	10	2454	0.180914	0.469842	not_significant	0.388346	0.742529	2.7279	1.534	3.922	0.609	4.477	0	-0.0467	-0.053	-0.04	0.003	-14.111	0	0.8158	0.632	1	0.094	8.685	0	0.8082	0.589	1.027	0.112	7.23	0	-0.522	-1.689	0.645	0.595	-0.877	0.381	0.0673
Complications of surgical and medical procedures		1.2851	0.451	2.119	0.425	3.021	3.61503	1.56988	8.32281	42	5509	10	2454	0.00252197	0.0360233	mi_significant	0.558112	2.59826	2.7327	1.538	3.927	0.61	4.483	0	-0.0468	-0.053	-0.04	0.003	-14.148	0	0.8201	0.636	1.004	0.094	8.726	0	0.8123	0.593	1.032	0.112	7.262	0	-0.5246	-1.692	0.643	0.596	-0.881	0.378	0.0607
Complications of transplants and reattached limbs	injuries & poisonings	0.7959	0.219	1.373	0.295	2.703	2.21643	1.24483	3.94717	59	5492	16	2448	0.00687889	0.0705921	not_significant	0.345655	2.16248	2.734	1.54	3.928	0.609	4.487	0	-0.0468	-0.053	-0.04	0.003	-14.139	0	0.8149	0.631	0.999	0.094	8.672	0	0.8079	0.589	1.027	0.112	7.225	0	-0.5231	-1.69	0.644	0.595	-0.879	0.38	0.0643
Concussion	injuries & poisonings	0.4085	-0.416	1.233	0.421	0.971	1.50456	0.65968	3.43151	25	5526	10	2454	0.331513	0.604937	not_significant	0.177409	0.4795	2.7227	1.528	3.917	0.609	4.468	0	-0.0466	-0.053	-0.04	0.003	-14.088	0	0.8188	0.635	1.003	0.094	8.718	0	0.8087	0.59	1.028	0.112	7.235	0	-0.5216	-1.688	0.645	0.595	-0.876	0.381	0.0649
Conduct disorders	mental disorders	0.718	-1.614	3.05	1.19	0.603	2.05033	0.19909	21.1153	10	5541	10	2454	0.546275	0.758755	not_significant	0.311823	0.262589	2.7228	1.529	3.917	0.609	4.469	0	-0.0466	-0.053	-0.04	0.003	-14.086	0	0.8185	0.634	1.003	0.094	8.715	0	0.8086	0.589	1.028	0.112	7.233	0	-0.5208	-1.688	0.646	0.595	-0.875	0.382	0.0668
Conductive hearing loss	sense organs	0.7314	-0.191	1.654	0.471	1.555	2.07799	0.826133	5.22785	26	5525	10	2454	0.120059	0.393958	not_significant	0.317643	0.920604	2.7266	1.532	3.921	0.609	4.475	0	-0.0467	-0.053	-0.04	0.003	-14.106	0	0.8168	0.633	1.001	0.094	8.697	0	0.809	0.59	1.028	0.112	7.236	0	-0.5219	-1.689	0.645	0.595	-0.877	0.381	0.0641
Congenital anomalies of esophagus	congenital anomalies	-0.9395	-3.35	1.471	1.23	-0.764	0.390823	0.0350844	4.35359	10	5541	10	2454	0.444932	0.704032	not_significant	-0.40802	0.351706	2.7214	1.527	3.916	0.609	4.467	0	-0.0466	-0.053	-0.04	0.003	-14.078	0	0.8185	0.634	1.003	0.094	8.716	0	0.808	0.589	1.027	0.112	7.229	0	-0.5202	-1.687	0.647	0.595	-0.874	0.382	0.0669
Congenital anomalies of face and neck	congenital anomalies	1.4322	-0.715	3.579	1.095	1.308	4.1879	0.489192	35.8377	10	5541	10	2454	0.191017	0.480725	not_significant	0.621997	0.718929	2.7254	1.531	3.92	0.609	4.473	0	-0.0466	-0.053	-0.04	0.003	-14.097	0	0.8174	0.633	1.001	0.094	8.703	0	0.8079	0.589	1.027	0.112	7.227	0	-0.5205	-1.687	0.646	0.595	-0.874	0.382	0.0665
Congenital anomalies of great vessels	congenital anomalies	0.1145	-1.38	1.609	0.762	0.15	1.12131	0.251579	4.99781	10	5541	10	2454	0.88066	0.949855	not_significant	0.0497267	0.0551917	2.7229	1.529	3.917	0.609	4.469	0	-0.0466	-0.053	-0.04	0.003	-14.087	0	0.8181	0.634	1.002	0.094	8.711	0	0.808	0.589	1.027	0.112	7.228	0	-0.5203	-1.687	0.646	0.595	-0.874	0.382	0.067
Congenital anomalies of male genital organs	congenital anomalies	1.9443	-0.086	3.975	1.036	1.877	6.98874	0.917594	53.2501	17	5534	10	2454	0.0605793	0.288434	not_significant	0.844399	1.21768	2.7199	1.526	3.914	0.609	4.465	0	-0.0465	-0.053	-0.04	0.003	-14.047	0	0.8154	0.631	0.999	0.094	8.683	0	0.8066	0.587	1.026	0.112	7.216	0	-0.5211	-1.688	0.645	0.595	-0.876	0.381	0.0661
Congenital anomalies of mouth/tongue	congenital anomalies	0.5259	-1.742	2.794	1.157	0.454	1.69198	0.17517	16.3463	10	5541	10	2454	0.649525	0.817319	not_significant	0.228395	0.187404	2.7225	1.528	3.917	0.609	4.468	0	-0.0466	-0.053	-0.04	0.003	-14.085	0	0.818	0.634	1.002	0.094	8.71	0	0.8079	0.589	1.027	0.112	7.228	0	-0.5203	-1.687	0.646	0.595	-0.874	0.382	0.0667
Congenital anomalies of peripheral vascular system	congenital anomalies	0.1513	-1.225	1.528	0.702	0.215	1.16335	0.293758	4.60895	10	5541	10	2454	0.8294	0.929058	not_significant	0.0657088	0.0812357	2.7224	1.528	3.917	0.609	4.468	0	-0.0466	-0.053	-0.04	0.003	-14.084	0	0.818	0.634	1.002	0.094	8.71	0	0.8078	0.589	1.027	0.112	7.227	0	-0.5203	-1.687	0.646	0.595	-0.874	0.382	0.0669
Congenital anomalies of skin	dermatologic	0.444	-0.584	1.472	0.524	0.847	1.55893	0.557663	4.35794	17	5534	10	2454	0.397149	0.670635	not_significant	0.192827	0.401047	2.7199	1.526	3.914	0.609	4.464	0	-0.0465	-0.053	-0.04	0.003	-14.064	0	0.8187	0.635	1.003	0.094	8.716	0	0.8085	0.589	1.028	0.112	7.233	0	-0.5209	-1.688	0.646	0.595	-0.875	0.382	0.0661
Congenital deformities of feet	congenital anomalies	0.0007	-0.908	0.91	0.464	0.002	1.0007	0.40333	2.48432	14	5537	10	2454	0.998722	0.999239	not_significant	0.000304006	0.00055553	2.7226	1.528	3.917	0.609	4.469	0	-0.0466	-0.053	-0.04	0.003	-14.086	0	0.8182	0.634	1.002	0.094	8.712	0	0.808	0.589	1.027	0.112	7.228	0	-0.5203	-1.687	0.647	0.595	-0.874	0.382	0.067
Congenital musculoskeletal deformities of spine	congenital anomalies	-1.6112	-4.065	0.843	1.252	-1.287	0.199648	0.017163	2.32333	10	5541	10	2454	0.198109	0.48582	not_significant	-0.699735	0.703095	2.7227	1.528	3.917	0.609	4.469	0	-0.0466	-0.053	-0.04	0.003	-14.089	0	0.8186	0.635	1.003	0.094	8.717	0	0.808	0.589	1.027	0.112	7.229	0	-0.5203	-1.687	0.647	0.595	-0.874	0.382	0.0684
Congenital osteodystrophies	congenital anomalies	0.6187	0.035	1.203	0.298	2.077	1.85651	1.03562	3.33009	54	5497	16	2448	0.0378212	0.220867	not_significant	0.268698	1.42226	2.7254	1.531	3.92	0.609	4.473	0	-0.0467	-0.053	-0.04	0.003	-14.107	0	0.8189	0.635	1.003	0.094	8.717	0	0.8106	0.591	1.03	0.112	7.248	0	-0.5244	-1.691	0.643	0.595	-0.881	0.378	0.0634
Congestive heart failure (CHF) NOS	circulatory system	0.9963	-0.028	2.021	0.523	1.906	2.70824	0.972388	7.54587	20	5531	10	2454	0.0566123	0.275757	not_significant	0.432688	1.24709	2.7319	1.537	3.927	0.61	4.482	0	-0.0468	-0.053	-0.04	0.003	-14.136	0	0.82	0.636	1.004	0.094	8.726	0	0.8117	0.592	1.031	0.112	7.258	0	-0.5232	-1.69	0.644	0.596	-0.879	0.38	0.0636
Conjunctivitis, infectious	sense organs	0.0844	-0.279	0.448	0.186	0.455	1.08806	0.75654	1.56518	103	5448	47	2417	0.649276	0.817319	not_significant	0.0366545	0.187571	2.723	1.529	3.917	0.609	4.469	0	-0.0466	-0.053	-0.04	0.003	-14.09	0	0.8187	0.635	1.003	0.094	8.717	0	0.809	0.59	1.028	0.112	7.236	0	-0.5219	-1.689	0.645	0.595	-0.877	0.381	0.0653
Conjunctivitis, noninfectious	sense organs	-0.541	-2.408	1.326	0.953	-0.568	0.582166	0.0899951	3.76595	10	5541	10	2454	0.570082	0.775181	not_significant	-0.234953	0.244062	2.7233	1.529	3.917	0.609	4.47	0	-0.0466	-0.053	-0.04	0.003	-14.089	0	0.8177	0.634	1.002	0.094	8.706	0	0.8077	0.589	1.027	0.112	7.226	0	-0.5197	-1.687	0.647	0.595	-0.873	0.383	0.0676
Constipation	digestive	0.3217	-0.05	0.693	0.19	1.696	1.37947	0.951229	1.99971	120	5431	43	2421	0.0898365	0.332018	not_significant	0.139713	1.04655	2.7094	1.513	3.905	0.61	4.44	0	-0.0467	-0.053	-0.04	0.003	-14.115	0	0.8187	0.635	1.003	0.094	8.716	0	0.8104	0.591	1.03	0.112	7.248	0	-0.5073	-1.676	0.661	0.596	-0.851	0.395	0.0779
Contact and allergic dermatitis of eyelid	dermatologic	0.6208	-1.68	2.922	1.174	0.529	1.86042	0.186374	18.5784	10	5541	10	2454	0.596932	0.785423	not_significant	0.26961	0.224075	2.7233	1.529	3.917	0.609	4.47	0	-0.0466	-0.053	-0.04	0.003	-14.089	0	0.8176	0.634	1.002	0.094	8.706	0	0.808	0.589	1.027	0.112	7.229	0	-0.5206	-1.687	0.646	0.595	-0.875	0.382	0.0673
Contact dermatitis and other eczema due to plants [except food]	dermatologic	-0.2822	-1.047	0.483	0.39	-0.723	0.754123	0.350989	1.62093	15	5536	13	2451	0.469884	0.724792	not_significant	-0.122558	0.328009	2.7215	1.527	3.916	0.609	4.467	0	-0.0466	-0.053	-0.04	0.003	-14.076	0	0.8179	0.634	1.002	0.094	8.709	0	0.8069	0.588	1.026	0.112	7.218	0	-0.5194	-1.686	0.647	0.595	-0.872	0.383	0.0676
Contracture of joint	musculoskeletal	1.0529	-0.262	2.368	0.671	1.57	2.86595	0.769511	10.676	13	5538	10	2454	0.116488	0.390881	not_significant	0.457269	0.93372	2.7256	1.531	3.92	0.609	4.473	0	-0.0467	-0.053	-0.04	0.003	-14.101	0	0.8191	0.635	1.003	0.094	8.719	0	0.8093	0.59	1.028	0.112	7.239	0	-0.5208	-1.688	0.646	0.595	-0.875	0.382	0.0653
Contracture of palmar fascia [Dupuytren's disease]	musculoskeletal	-0.7336	-1.942	0.475	0.617	-1.19	0.480177	0.143417	1.60801	10	5541	10	2454	0.234218	0.534977	not_significant	-0.318598	0.63038	2.7221	1.528	3.916	0.609	4.468	0	-0.0466	-0.053	-0.04	0.003	-14.086	0	0.8191	0.635	1.003	0.094	8.722	0	0.8082	0.589	1.027	0.112	7.23	0	-0.5203	-1.687	0.647	0.595	-0.874	0.382	0.0671
Contusion	injuries & poisonings	0.2847	-0.111	0.68	0.202	1.41	1.32936	0.894939	1.97388	96	5455	39	2425	0.158462	0.44426	not_significant	0.123644	0.800075	2.7301	1.536	3.925	0.609	4.48	0	-0.0468	-0.053	-0.04	0.003	-14.124	0	0.818	0.634	1.002	0.094	8.709	0	0.8086	0.589	1.028	0.112	7.233	0	-0.5226	-1.69	0.644	0.595	-0.878	0.38	0.0619
Convulsions	neurological	0.9606	-0.149	2.07	0.566	1.697	2.61326	0.861569	7.92482	21	5530	10	2454	0.0896257	0.332018	not_significant	0.417183	1.04757	2.7249	1.531	3.919	0.609	4.472	0	-0.0467	-0.053	-0.04	0.003	-14.104	0	0.8199	0.636	1.004	0.094	8.727	0	0.8118	0.593	1.031	0.112	7.26	0	-0.5233	-1.69	0.644	0.595	-0.879	0.379	0.0624
Corneal opacity	sense organs	0.4512	-0.824	1.727	0.651	0.693	1.5702	0.438673	5.62376	10	5541	10	2454	0.488059	0.729925	not_significant	0.195954	0.311528	2.7261	1.532	3.92	0.609	4.474	0	-0.0467	-0.053	-0.04	0.003	-14.103	0	0.8189	0.635	1.003	0.094	8.718	0	0.8093	0.59	1.028	0.112	7.238	0	-0.5214	-1.688	0.646	0.595	-0.876	0.381	0.0661
Corneal opacity and other disorders of cornea	sense organs	0.5419	-0.736	1.82	0.652	0.831	1.71927	0.479026	6.17186	10	5541	10	2454	0.405853	0.680918	not_significant	0.235344	0.391631	2.7269	1.533	3.921	0.609	4.475	0	-0.0467	-0.053	-0.04	0.003	-14.108	0	0.8186	0.635	1.003	0.094	8.718	0	0.8086	0.59	1.028	0.112	7.234	0	-0.5207	-1.688	0.646	0.595	-0.875	0.382	0.0659
Corns and callosities	dermatologic	0.385	-0.199	0.969	0.298	1.292	1.46961	0.81955	2.63531	49	5502	17	2447	0.196244	0.485072	not_significant	0.167203	0.707203	2.7299	1.535	3.924	0.609	4.48	0	-0.0467	-0.053	-0.04	0.003	-14.124	0	0.8176	0.633	1.002	0.094	8.704	0	0.8074	0.588	1.027	0.112	7.223	0	-0.5226	-1.69	0.644	0.595	-0.878	0.38	0.0635
Coronary atherosclerosis	circulatory system	0.7114	0.292	1.13	0.214	3.328	2.03684	1.3391	3.09566	104	5447	33	2431	0.000874353	0.019254	mi_significant	0.308957	3.05831	2.7802	1.584	3.976	0.61	4.556	0	-0.0479	-0.054	-0.041	0.003	-14.365	0	0.8137	0.629	0.998	0.094	8.657	0	0.8053	0.586	1.025	0.112	7.199	0	-0.529	-1.697	0.639	0.596	-0.888	0.375	0.0541
Costochondritis		-0.6013	-2.533	1.331	0.986	-0.61	0.548099	0.0794204	3.78483	10	5541	10	2454	0.54182	0.75871	not_significant	-0.261141	0.266145	2.7218	1.528	3.916	0.609	4.467	0	-0.0466	-0.053	-0.04	0.003	-14.083	0	0.8188	0.635	1.003	0.094	8.718	0	0.8079	0.589	1.027	0.112	7.228	0	-0.5199	-1.687	0.647	0.595	-0.873	0.383	0.0674
Cough	respiratory	0.6452	0.416	0.874	0.117	5.524	1.90637	1.51589	2.39648	402	5149	108	2356	3.30767e-08	8.74051e-06	mi_significant	0.280207	7.48048	2.7539	1.555	3.953	0.612	4.502	0	-0.0477	-0.054	-0.041	0.003	-14.369	0	0.8106	0.626	0.995	0.094	8.615	0	0.8114	0.592	1.031	0.112	7.248	0	-0.5268	-1.698	0.645	0.598	-0.881	0.378	0.0478
Crushing injury		-1.0808	-2.892	0.73	0.924	-1.17	0.339324	0.0554652	2.07508	10	5541	10	2454	0.242074	0.543254	not_significant	-0.469385	0.616051	2.724	1.53	3.918	0.609	4.471	0	-0.0466	-0.053	-0.04	0.003	-14.095	0	0.8181	0.634	1.002	0.094	8.71	0	0.8063	0.587	1.025	0.112	7.212	0	-0.5185	-1.685	0.648	0.595	-0.871	0.384	0.067
Cyst and pseudocyst of pancreas	digestive	-0.0937	-1.672	1.484	0.805	-0.116	0.910556	0.187871	4.41055	10	5541	10	2454	0.90734	0.96291	not_significant	-0.0406934	0.0422297	2.722	1.528	3.916	0.609	4.467	0	-0.0466	-0.053	-0.04	0.003	-14.073	0	0.8182	0.634	1.002	0.094	8.713	0	0.808	0.589	1.027	0.112	7.228	0	-0.5203	-1.687	0.647	0.595	-0.874	0.382	0.0673
Cyst of bone	musculoskeletal	-0.0492	-1.319	1.221	0.648	-0.076	0.951991	0.267403	3.39058	10	5541	10	2454	0.939537	0.97649	not_significant	-0.0213673	0.0270861	2.7227	1.529	3.917	0.609	4.469	0	-0.0466	-0.053	-0.04	0.003	-14.087	0	0.8182	0.634	1.002	0.094	8.712	0	0.8079	0.589	1.027	0.112	7.228	0	-0.5203	-1.687	0.647	0.595	-0.874	0.382	0.0671
Cyst of kidney, acquired	genitourinary	1.0033	0.163	1.844	0.429	2.34	2.72727	1.17704	6.32177	39	5512	10	2454	0.0192861	0.135902	not_significant	0.435728	1.71476	2.7314	1.537	3.926	0.609	4.483	0	-0.0468	-0.053	-0.04	0.003	-14.128	0	0.8154	0.631	1	0.094	8.679	0	0.8067	0.588	1.026	0.112	7.216	0	-0.523	-1.69	0.644	0.595	-0.878	0.38	0.0626
Cyst of the salivary gland	digestive	-0.3249	-3.166	2.516	1.449	-0.224	0.7226	0.0421719	12.379	10	5541	10	2454	0.822627	0.925018	not_significant	-0.141102	0.0847971	2.7224	1.528	3.917	0.609	4.468	0	-0.0466	-0.053	-0.04	0.003	-14.085	0	0.8183	0.634	1.002	0.094	8.713	0	0.808	0.589	1.027	0.112	7.229	0	-0.5203	-1.687	0.647	0.595	-0.874	0.382	0.067
Cystic kidney disease	congenital anomalies	0.7629	-0.626	2.152	0.709	1.077	2.14449	0.534726	8.60205	10	5541	10	2454	0.281646	0.578058	not_significant	0.331323	0.550297	2.7257	1.531	3.92	0.609	4.473	0	-0.0467	-0.053	-0.04	0.003	-14.109	0	0.82	0.636	1.004	0.094	8.727	0	0.81	0.591	1.029	0.112	7.245	0	-0.5215	-1.688	0.646	0.595	-0.876	0.381	0.0651
Cystitis	genitourinary	-0.5989	-2.584	1.386	1.013	-0.591	0.549416	0.0754715	3.99882	10	5541	10	2454	0.554234	0.764785	not_significant	-0.260099	0.256307	2.7223	1.528	3.916	0.609	4.468	0	-0.0466	-0.053	-0.04	0.003	-14.086	0	0.8189	0.635	1.003	0.094	8.719	0	0.808	0.589	1.027	0.112	7.228	0	-0.5199	-1.687	0.647	0.595	-0.873	0.383	0.0667
Cystoid macular degeneration of retina	sense organs	1.7582	-0.447	3.964	1.125	1.562	5.80198	0.639544	52.6676	10	5541	10	2454	0.118173	0.393958	not_significant	0.763577	0.927481	2.7385	1.544	3.933	0.61	4.492	0	-0.047	-0.053	-0.04	0.003	-14.164	0	0.8182	0.634	1.002	0.094	8.71	0	0.8043	0.585	1.023	0.112	7.193	0	-0.5213	-1.689	0.646	0.596	-0.875	0.381	0.064
Cysts of the jaws	digestive	0.1697	-2.243	2.583	1.231	0.138	1.18495	0.10614	13.2368	10	5541	10	2454	0.890362	0.954348	not_significant	0.0736998	0.0504333	2.7224	1.528	3.917	0.609	4.468	0	-0.0466	-0.053	-0.04	0.003	-14.085	0	0.8182	0.634	1.002	0.094	8.713	0	0.8077	0.589	1.027	0.112	7.225	0	-0.5202	-1.687	0.647	0.595	-0.874	0.382	0.067
Decreased libido	mental disorders	0.394	-0.057	0.845	0.23	1.714	1.4829	0.944594	2.32798	80	5471	29	2435	0.0865377	0.331635	not_significant	0.171112	1.06279	2.7315	1.537	3.926	0.609	4.482	0	-0.0468	-0.053	-0.04	0.003	-14.138	0	0.8194	0.635	1.004	0.094	8.723	0	0.8112	0.592	1.03	0.112	7.255	0	-0.5269	-1.694	0.64	0.596	-0.885	0.376	0.0613
Decreased white blood cell count	hematopoietic	0.48	-0.136	1.096	0.314	1.528	1.61607	0.872843	2.99217	42	5509	15	2449	0.126507	0.401555	not_significant	0.208461	0.897886	2.7038	1.507	3.901	0.611	4.428	0	-0.0467	-0.053	-0.04	0.003	-14.117	0	0.8167	0.633	1.001	0.094	8.695	0	0.8086	0.589	1.028	0.112	7.233	0	-0.4975	-1.667	0.672	0.597	-0.834	0.404	0.0909
Decubitus ulcer	dermatologic	1.3989	-0.739	3.536	1.091	1.283	4.05074	0.477591	34.3293	10	5541	10	2454	0.199576	0.486065	not_significant	0.607535	0.699891	2.7238	1.53	3.918	0.609	4.47	0	-0.0466	-0.053	-0.04	0.003	-14.095	0	0.8188	0.635	1.003	0.094	8.717	0	0.8094	0.59	1.029	0.112	7.24	0	-0.5214	-1.688	0.645	0.595	-0.876	0.381	0.0657
Deep vein thrombosis [DVT]	circulatory system	1.0823	0.161	2.003	0.47	2.303	2.95146	1.17468	7.41126	28	5523	10	2454	0.0212883	0.143915	not_significant	0.470037	1.67186	2.736	1.542	3.93	0.609	4.49	0	-0.0469	-0.053	-0.04	0.003	-14.153	0	0.8148	0.631	0.999	0.094	8.673	0	0.8063	0.587	1.025	0.112	7.211	0	-0.5222	-1.689	0.645	0.595	-0.877	0.38	0.0661
Deficiency anemias	hematopoietic	0.8683	-0.853	2.59	0.878	0.989	2.38286	0.426135	13.3298	10	5541	10	2454	0.322849	0.599738	not_significant	0.377098	0.491001	2.7298	1.535	3.924	0.609	4.479	0	-0.0467	-0.053	-0.04	0.003	-14.119	0	0.8179	0.634	1.002	0.094	8.707	0	0.8094	0.59	1.029	0.112	7.24	0	-0.5224	-1.689	0.645	0.595	-0.877	0.38	0.0668
Deficiency of humoral immunity	endocrine/metabolic	0.4947	-1.151	2.14	0.84	0.589	1.64001	0.31632	8.49944	10	5541	10	2454	0.555706	0.765331	not_significant	0.214845	0.255155	2.7218	1.528	3.916	0.609	4.467	0	-0.0466	-0.053	-0.04	0.003	-14.076	0	0.8178	0.634	1.002	0.094	8.708	0	0.8079	0.589	1.027	0.112	7.227	0	-0.5203	-1.687	0.647	0.595	-0.874	0.382	0.0673
Degeneration of intervertebral disc	musculoskeletal	0.4266	0.034	0.819	0.2	2.13	1.53204	1.03458	2.26823	103	5448	38	2426	0.033203	0.200546	not_significant	0.18527	1.47882	2.7263	1.529	3.923	0.611	4.464	0	-0.047	-0.053	-0.04	0.003	-14.18	0	0.8152	0.631	0.999	0.094	8.676	0	0.8083	0.589	1.027	0.112	7.229	0	-0.5124	-1.682	0.657	0.597	-0.859	0.391	0.0774
Degenerative and vascular disorders of ear	sense organs	0.7272	-0.567	2.022	0.66	1.101	2.06928	0.567225	7.55342	11	5540	10	2454	0.270819	0.569565	not_significant	0.315819	0.567321	2.685	1.486	3.884	0.612	4.388	0	-0.0465	-0.053	-0.04	0.003	-14.069	0	0.8188	0.635	1.003	0.094	8.716	0	0.808	0.589	1.027	0.112	7.229	0	-0.4854	-1.657	0.686	0.598	-0.812	0.417	0.1022
Delirium due to conditions classified elsewhere	mental disorders	0.5207	-0.625	1.666	0.584	0.891	1.68321	0.535261	5.29096	10	5541	10	2454	0.372871	0.644987	not_significant	0.226137	0.428441	2.7297	1.535	3.924	0.609	4.479	0	-0.0468	-0.053	-0.04	0.003	-14.114	0	0.8183	0.634	1.002	0.094	8.712	0	0.8088	0.59	1.028	0.112	7.235	0	-0.5213	-1.688	0.646	0.595	-0.875	0.381	0.0659
Dementia with cerebral degenerations	mental disorders	-1.1867	-3.463	1.089	1.161	-1.022	0.305227	0.0313356	2.9713	10	5541	10	2454	0.306843	0.582187	not_significant	-0.515377	0.513083	2.717	1.523	3.911	0.609	4.46	0	-0.0465	-0.053	-0.04	0.003	-14.04	0	0.8186	0.635	1.003	0.094	8.717	0	0.8096	0.59	1.029	0.112	7.241	0	-0.5198	-1.686	0.647	0.595	-0.873	0.383	0.0671
Dementias	mental disorders	2.0691	-0.143	4.281	1.129	1.833	7.91769	0.866754	72.3127	10	5541	10	2454	0.0667885	0.300406	not_significant	0.898599	1.1753	2.742	1.547	3.937	0.61	4.497	0	-0.0471	-0.054	-0.041	0.003	-14.181	0	0.8192	0.635	1.003	0.094	8.718	0	0.8082	0.589	1.027	0.112	7.227	0	-0.523	-1.69	0.644	0.596	-0.878	0.38	0.0655
Dental caries	digestive	-0.2371	-2.563	2.089	1.187	-0.2	0.788912	0.0770732	8.07683	10	5541	10	2454	0.841617	0.933462	not_significant	-0.102971	0.0748854	2.7231	1.529	3.917	0.609	4.469	0	-0.0466	-0.053	-0.04	0.003	-14.087	0	0.8184	0.634	1.002	0.094	8.714	0	0.808	0.589	1.027	0.112	7.228	0	-0.5202	-1.687	0.647	0.595	-0.874	0.382	0.067
Dentofacial anomalies, including malocclusion	digestive	-0.0136	-1.159	1.132	0.584	-0.023	0.986492	0.3138	3.10185	10	5541	10	2454	0.981384	0.991704	not_significant	-0.0059064	0.00816112	2.7226	1.528	3.917	0.609	4.469	0	-0.0466	-0.053	-0.04	0.003	-14.086	0	0.8182	0.634	1.002	0.094	8.711	0	0.8079	0.589	1.027	0.112	7.228	0	-0.5203	-1.687	0.647	0.595	-0.874	0.382	0.0671
Dependence on respirator [Ventilator] or supplemental oxygen	respiratory	1.2959	-0.044	2.636	0.684	1.895	3.65428	0.956954	13.9573	12	5539	10	2454	0.0581063	0.279174	not_significant	0.562802	1.23578	2.7059	1.505	3.907	0.613	4.416	0	-0.047	-0.053	-0.04	0.003	-14.174	0	0.8165	0.632	1.001	0.094	8.692	0	0.8079	0.589	1.027	0.112	7.225	0	-0.4879	-1.662	0.686	0.599	-0.814	0.415	0.0996
Depression		1.091	0.346	1.836	0.38	2.871	2.97725	1.4134	6.2714	41	5510	10	2454	0.00408676	0.0496518	mi_significant	0.473815	2.38862	2.7311	1.536	3.926	0.61	4.48	0	-0.0468	-0.053	-0.04	0.003	-14.128	0	0.8215	0.637	1.006	0.094	8.74	0	0.813	0.594	1.032	0.112	7.268	0	-0.5253	-1.693	0.642	0.596	-0.882	0.378	0.0625
Dermatitis due to solar radiation	dermatologic	0.9197	-0.126	1.966	0.534	1.723	2.50854	0.881615	7.14205	17	5534	10	2454	0.0848129	0.328378	not_significant	0.399421	1.07154	2.7362	1.542	3.931	0.609	4.489	0	-0.0469	-0.053	-0.04	0.003	-14.154	0	0.8167	0.633	1.001	0.094	8.695	0	0.807	0.588	1.026	0.112	7.218	0	-0.5213	-1.688	0.646	0.595	-0.875	0.381	0.0654
Dermatochalasis	sense organs	0.29	-0.823	1.403	0.568	0.511	1.33643	0.439112	4.06738	12	5539	10	2454	0.609423	0.791426	not_significant	0.125945	0.215081	2.7265	1.532	3.921	0.609	4.474	0	-0.0467	-0.053	-0.04	0.003	-14.092	0	0.8181	0.634	1.002	0.094	8.711	0	0.8073	0.588	1.026	0.112	7.222	0	-0.5205	-1.687	0.646	0.595	-0.874	0.382	0.0654
Dermatomycoses	infectious diseases	0.133	-0.432	0.698	0.288	0.462	1.14225	0.649209	2.00973	47	5504	19	2445	0.644429	0.813813	not_significant	0.0577612	0.190825	2.7235	1.529	3.918	0.609	4.47	0	-0.0466	-0.053	-0.04	0.003	-14.091	0	0.8177	0.634	1.002	0.094	8.707	0	0.8078	0.589	1.027	0.112	7.227	0	-0.5211	-1.688	0.646	0.595	-0.875	0.381	0.0662
Dermatophytosis	infectious diseases	2.415	0.375	4.455	1.041	2.32	11.1898	1.45499	86.0562	19	5532	10	2454	0.0203175	0.140363	not_significant	1.04882	1.69213	2.7366	1.542	3.931	0.61	4.489	0	-0.0469	-0.053	-0.04	0.003	-14.163	0	0.8192	0.635	1.003	0.094	8.719	0	0.8069	0.588	1.026	0.112	7.214	0	-0.5234	-1.691	0.644	0.596	-0.879	0.38	0.0625
Dermatophytosis of nail	infectious diseases	0.1942	-0.189	0.577	0.195	0.994	1.21434	0.827787	1.78069	91	5460	43	2421	0.320059	0.596654	not_significant	0.08434	0.494769	2.7304	1.536	3.925	0.609	4.48	0	-0.0468	-0.053	-0.04	0.003	-14.116	0	0.8175	0.633	1.002	0.094	8.703	0	0.808	0.589	1.027	0.112	7.227	0	-0.523	-1.69	0.644	0.595	-0.878	0.38	0.0645
Dermatophytosis of the body	infectious diseases	0.7103	0.182	1.239	0.27	2.635	2.0346	1.19961	3.45216	73	5478	19	2445	0.008416	0.0816121	not_significant	0.308479	2.07489	2.7316	1.537	3.926	0.61	4.482	0	-0.0468	-0.053	-0.04	0.003	-14.143	0	0.8201	0.636	1.004	0.094	8.725	0	0.8089	0.59	1.028	0.112	7.232	0	-0.5266	-1.694	0.641	0.596	-0.884	0.377	0.0593
Develomental delays and disorders	mental disorders	-0.0878	-1.94	1.765	0.945	-0.093	0.915944	0.143704	5.84157	10	5541	10	2454	0.926027	0.96914	not_significant	-0.0381311	0.0333762	2.7224	1.528	3.917	0.609	4.468	0	-0.0466	-0.053	-0.04	0.003	-14.084	0	0.8183	0.634	1.002	0.094	8.713	0	0.808	0.589	1.027	0.112	7.228	0	-0.5203	-1.687	0.647	0.595	-0.874	0.382	0.0671
Diabetes mellitus	endocrine/metabolic	1.0159	-0.017	2.049	0.527	1.928	2.76185	0.983144	7.76014	21	5530	10	2454	0.0538664	0.26857	not_significant	0.4412	1.26868	2.7368	1.542	3.931	0.609	4.491	0	-0.0469	-0.053	-0.04	0.003	-14.159	0	0.8159	0.632	1	0.094	8.684	0	0.8095	0.59	1.029	0.112	7.239	0	-0.5234	-1.69	0.644	0.595	-0.879	0.379	0.0656
Diabetes type 2 with peripheral circulatory disorders	endocrine/metabolic	1.4834	-0.086	3.052	0.8	1.853	4.40791	0.917594	21.1576	11	5540	10	2454	0.063868	0.294797	not_significant	0.644232	1.19472	2.7435	1.549	3.938	0.61	4.5	0	-0.0471	-0.054	-0.041	0.003	-14.178	0	0.8176	0.633	1.002	0.094	8.703	0	0.8078	0.589	1.027	0.112	7.224	0	-0.5214	-1.689	0.646	0.596	-0.875	0.381	0.0626
Diabetic retinopathy	endocrine/metabolic	0.9701	0.024	1.916	0.482	2.011	2.63821	1.02429	6.79373	25	5526	10	2454	0.0443533	0.237977	not_significant	0.421309	1.35307	2.7417	1.547	3.937	0.61	4.497	0	-0.0471	-0.054	-0.041	0.003	-14.187	0	0.8205	0.636	1.005	0.094	8.734	0	0.8157	0.596	1.035	0.112	7.292	0	-0.5284	-1.696	0.639	0.596	-0.887	0.375	0.0601
Diaphragmatic hernia	digestive	0.2493	-0.297	0.796	0.279	0.895	1.28313	0.743044	2.21666	47	5504	20	2444	0.370928	0.643794	not_significant	0.10827	0.430711	2.7237	1.529	3.918	0.609	4.47	0	-0.0466	-0.053	-0.04	0.003	-14.093	0	0.8183	0.634	1.002	0.094	8.713	0	0.8104	0.591	1.03	0.112	7.248	0	-0.5227	-1.69	0.644	0.595	-0.878	0.38	0.0657
Diarrhea	digestive	0.3099	0.015	0.605	0.151	2.059	1.36329	1.01511	1.83125	176	5375	70	2394	0.0394636	0.22392	not_significant	0.134588	1.4038	2.7157	1.52	3.912	0.61	4.45	0	-0.0467	-0.053	-0.04	0.003	-14.116	0	0.8194	0.635	1.004	0.094	8.722	0	0.8141	0.595	1.033	0.112	7.278	0	-0.5171	-1.686	0.652	0.596	-0.867	0.386	0.0709
Difficulty in walking	musculoskeletal	1.478	-0.119	3.075	0.815	1.814	4.38417	0.887808	21.6499	10	5541	10	2454	0.0696556	0.304228	not_significant	0.641887	1.15704	2.7289	1.534	3.924	0.61	4.477	0	-0.0468	-0.053	-0.04	0.003	-14.124	0	0.8212	0.637	1.005	0.094	8.742	0	0.8114	0.592	1.031	0.112	7.257	0	-0.5222	-1.689	0.645	0.596	-0.877	0.381	0.0647
Diplopia and disorders of binocular vision	sense organs	0.6014	-0.297	1.5	0.459	1.311	1.82467	0.743044	4.48169	23	5528	10	2454	0.189701	0.478663	not_significant	0.261185	0.72193	2.7309	1.537	3.925	0.609	4.482	0	-0.0468	-0.053	-0.04	0.003	-14.124	0	0.816	0.632	1	0.094	8.687	0	0.8076	0.589	1.027	0.112	7.225	0	-0.5218	-1.689	0.645	0.595	-0.876	0.381	0.0653
Disease of capillaries	circulatory system	0.626	-1.674	2.925	1.173	0.534	1.87012	0.187496	18.6342	10	5541	10	2454	0.593657	0.785236	not_significant	0.271868	0.226464	2.723	1.529	3.917	0.609	4.469	0	-0.0466	-0.053	-0.04	0.003	-14.089	0	0.8183	0.634	1.002	0.094	8.713	0	0.8088	0.59	1.028	0.112	7.235	0	-0.5212	-1.688	0.646	0.595	-0.875	0.381	0.0669
Diseases and other conditions of the tongue	digestive	0.5996	-0.543	1.742	0.583	1.028	1.82139	0.581003	5.70875	16	5535	10	2454	0.303779	0.582187	not_significant	0.260403	0.517442	2.7251	1.531	3.919	0.609	4.472	0	-0.0466	-0.053	-0.04	0.003	-14.1	0	0.8179	0.634	1.002	0.094	8.709	0	0.8084	0.589	1.027	0.112	7.231	0	-0.5214	-1.688	0.645	0.595	-0.876	0.381	0.0649
Diseases of esophagus	digestive	0.8746	-0.46	2.209	0.681	1.284	2.39792	0.631284	9.10661	12	5539	10	2454	0.199016	0.48582	not_significant	0.379834	0.701112	2.7278	1.533	3.922	0.609	4.477	0	-0.0467	-0.053	-0.04	0.003	-14.115	0	0.8174	0.633	1.001	0.094	8.702	0	0.8086	0.59	1.028	0.112	7.233	0	-0.5223	-1.689	0.645	0.595	-0.877	0.38	0.0663
Diseases of hair and hair follicles	dermatologic	0.4372	0.053	0.821	0.196	2.233	1.54837	1.05443	2.27277	117	5434	38	2426	0.0255749	0.164703	not_significant	0.189874	1.59219	2.7248	1.53	3.919	0.609	4.472	0	-0.0466	-0.053	-0.04	0.003	-14.096	0	0.8188	0.635	1.003	0.094	8.714	0	0.8129	0.594	1.032	0.112	7.271	0	-0.528	-1.695	0.639	0.595	-0.887	0.375	0.0597
Diseases of lips	digestive	0.0177	-0.682	0.717	0.357	0.05	1.01786	0.505605	2.04828	27	5524	13	2451	0.960499	0.980443	not_significant	0.00768701	0.0175033	2.7226	1.528	3.917	0.609	4.469	0	-0.0466	-0.053	-0.04	0.003	-14.086	0	0.8183	0.634	1.002	0.094	8.711	0	0.8082	0.589	1.027	0.112	7.226	0	-0.5205	-1.687	0.646	0.595	-0.874	0.382	0.0669
Diseases of nail, NOS	dermatologic	0.4168	-0.056	0.89	0.241	1.726	1.5171	0.945539	2.43513	73	5478	26	2438	0.0843285	0.327703	not_significant	0.181014	1.07403	2.7302	1.536	3.925	0.609	4.48	0	-0.0468	-0.053	-0.04	0.003	-14.132	0	0.8189	0.635	1.003	0.094	8.718	0	0.81	0.591	1.029	0.112	7.244	0	-0.5245	-1.692	0.643	0.595	-0.881	0.378	0.0618
Diseases of pancreas	digestive	0.9626	-0.181	2.106	0.583	1.65	2.6185	0.834435	8.21531	19	5532	10	2454	0.0989763	0.349893	not_significant	0.418052	1.00447	2.7272	1.533	3.922	0.609	4.475	0	-0.0467	-0.053	-0.04	0.003	-14.113	0	0.8192	0.635	1.003	0.094	8.722	0	0.8094	0.59	1.029	0.112	7.24	0	-0.5218	-1.689	0.645	0.595	-0.876	0.381	0.0635
Diseases of the jaws	digestive	0.698	-0.616	2.012	0.67	1.041	2.00973	0.540101	7.47826	12	5539	10	2454	0.297865	0.578862	not_significant	0.303138	0.525981	2.7242	1.53	3.918	0.609	4.471	0	-0.0466	-0.053	-0.04	0.003	-14.094	0	0.8177	0.634	1.002	0.094	8.706	0	0.8089	0.59	1.028	0.112	7.236	0	-0.5216	-1.688	0.645	0.595	-0.876	0.381	0.0661
Diseases of the larynx and vocal cords	respiratory	1.0228	0.084	1.961	0.479	2.136	2.78097	1.08763	7.10643	24	5527	10	2454	0.032678	0.198509	not_significant	0.444196	1.48574	2.7359	1.541	3.93	0.609	4.489	0	-0.0469	-0.053	-0.04	0.003	-14.161	0	0.8172	0.633	1.001	0.094	8.699	0	0.8069	0.588	1.026	0.112	7.217	0	-0.5225	-1.69	0.645	0.595	-0.877	0.38	0.0655
Diseases of the oral soft tissues, excluding lesions specific for gingiva and tongue	digestive	0.6505	-0.083	1.385	0.374	1.737	1.9165	0.920351	3.99483	38	5513	10	2454	0.0823661	0.32363	not_significant	0.282509	1.08425	2.7231	1.529	3.917	0.609	4.469	0	-0.0466	-0.053	-0.04	0.003	-14.087	0	0.8195	0.635	1.004	0.094	8.725	0	0.807	0.588	1.026	0.112	7.22	0	-0.5214	-1.688	0.646	0.595	-0.876	0.381	0.0632
Dislocation	injuries & poisonings	-0.1202	-0.629	0.388	0.259	-0.463	0.886743	0.533125	1.47403	45	5506	26	2438	0.643257	0.813305	not_significant	-0.0522022	0.191615	2.7353	1.541	3.93	0.609	4.488	0	-0.0466	-0.053	-0.04	0.003	-14.079	0	0.8179	0.634	1.002	0.094	8.709	0	0.8068	0.588	1.026	0.112	7.217	0	-0.5323	-1.699	0.635	0.595	-0.894	0.371	0.0544
Disorder of skin and subcutaneous tissue NOS	dermatologic	0.138	-0.131	0.407	0.137	1.005	1.14798	0.877218	1.5023	190	5361	89	2375	0.314711	0.590852	not_significant	0.0599326	0.502088	2.7313	1.537	3.926	0.609	4.481	0	-0.0468	-0.053	-0.04	0.003	-14.117	0	0.8185	0.634	1.003	0.094	8.714	0	0.8087	0.59	1.028	0.112	7.234	0	-0.5247	-1.692	0.642	0.595	-0.881	0.378	0.0619
Disorders involving the immune mechanism	endocrine/metabolic	1.1852	-0.064	2.434	0.637	1.859	3.27134	0.938005	11.4044	18	5533	10	2454	0.06296	0.293166	not_significant	0.514726	1.20094	2.7222	1.528	3.916	0.609	4.468	0	-0.0465	-0.053	-0.04	0.003	-14.068	0	0.8161	0.632	1	0.094	8.688	0	0.8094	0.59	1.029	0.112	7.241	0	-0.5228	-1.689	0.644	0.595	-0.878	0.38	0.0677
Disorders of acoustic nerve	sense organs	0.9061	-0.402	2.214	0.667	1.358	2.47465	0.668981	9.15225	13	5538	10	2454	0.174564	0.460535	not_significant	0.393514	0.758045	2.7223	1.528	3.917	0.609	4.467	0	-0.0466	-0.053	-0.04	0.003	-14.097	0	0.8217	0.638	1.006	0.094	8.743	0	0.8127	0.593	1.032	0.112	7.266	0	-0.5233	-1.69	0.644	0.595	-0.879	0.379	0.0637
Disorders of bilirubin excretion	endocrine/metabolic	0.4344	-0.352	1.221	0.401	1.083	1.54404	0.70328	3.39058	29	5522	10	2454	0.278862	0.577168	not_significant	0.188658	0.554611	2.7241	1.53	3.918	0.609	4.471	0	-0.0466	-0.053	-0.04	0.003	-14.092	0	0.8176	0.634	1.002	0.094	8.705	0	0.8087	0.59	1.028	0.112	7.233	0	-0.5222	-1.689	0.645	0.595	-0.877	0.38	0.0655
Disorders of coccyx		0.5899	-1.661	2.841	1.148	0.514	1.80381	0.189949	17.1329	10	5541	10	2454	0.607522	0.790826	not_significant	0.25619	0.216438	2.7232	1.529	3.917	0.609	4.47	0	-0.0466	-0.053	-0.04	0.003	-14.089	0	0.8178	0.634	1.002	0.094	8.707	0	0.808	0.589	1.027	0.112	7.229	0	-0.5206	-1.687	0.646	0.595	-0.874	0.382	0.067
Disorders of conjunctiva	sense organs	0.0884	-0.496	0.673	0.298	0.296	1.09243	0.608962	1.96011	42	5509	18	2446	0.766867	0.89824	not_significant	0.0383916	0.11528	2.7239	1.53	3.918	0.609	4.47	0	-0.0466	-0.053	-0.04	0.003	-14.087	0	0.8185	0.634	1.003	0.094	8.715	0	0.8087	0.59	1.028	0.112	7.233	0	-0.5214	-1.688	0.645	0.595	-0.876	0.381	0.0659
Disorders of diaphragm	respiratory	0.5802	-0.603	1.763	0.604	0.961	1.7864	0.547168	5.8299	13	5538	10	2454	0.336484	0.610072	not_significant	0.251978	0.473035	2.7244	1.53	3.919	0.609	4.471	0	-0.0466	-0.053	-0.04	0.003	-14.1	0	0.8193	0.635	1.003	0.094	8.722	0	0.8097	0.591	1.029	0.112	7.242	0	-0.5214	-1.688	0.646	0.595	-0.876	0.381	0.0649
Disorders of esophageal motility	digestive	-0.8674	-2.177	0.442	0.668	-1.298	0.420042	0.113381	1.55582	10	5541	10	2454	0.194319	0.484424	not_significant	-0.376707	0.711484	2.7211	1.527	3.915	0.609	4.466	0	-0.0466	-0.053	-0.04	0.003	-14.081	0	0.8201	0.636	1.004	0.094	8.731	0	0.8078	0.589	1.027	0.112	7.227	0	-0.519	-1.686	0.648	0.595	-0.872	0.383	0.0672
Disorders of external ear	sense organs	-0.2954	-1.177	0.586	0.45	-0.657	0.744234	0.308202	1.79679	13	5538	10	2454	0.511241	0.743868	not_significant	-0.128291	0.291374	2.7226	1.528	3.917	0.609	4.469	0	-0.0466	-0.053	-0.04	0.003	-14.086	0	0.8181	0.634	1.002	0.094	8.712	0	0.8071	0.588	1.026	0.112	7.22	0	-0.5195	-1.686	0.647	0.595	-0.873	0.383	0.0678
Disorders of iron metabolism	hematopoietic	0.8669	-0.437	2.171	0.665	1.303	2.37952	0.645971	8.76705	13	5538	10	2454	0.192684	0.482771	not_significant	0.37649	0.715155	2.7268	1.533	3.921	0.609	4.475	0	-0.0467	-0.053	-0.04	0.003	-14.105	0	0.8179	0.634	1.002	0.094	8.708	0	0.8075	0.588	1.027	0.112	7.223	0	-0.5218	-1.689	0.645	0.595	-0.876	0.381	0.0658
Disorders of magnesium metabolism	endocrine/metabolic	0.9621	-0.141	2.065	0.563	1.709	2.61719	0.868489	7.8853	18	5533	10	2454	0.0874193	0.332018	not_significant	0.417835	1.05839	2.724	1.53	3.918	0.609	4.471	0	-0.0466	-0.053	-0.04	0.003	-14.08	0	0.8164	0.632	1.001	0.094	8.692	0	0.8088	0.59	1.028	0.112	7.235	0	-0.5218	-1.689	0.645	0.595	-0.877	0.381	0.0672
Disorders of muscle, ligament, and fascia	musculoskeletal	0.0602	-1.485	1.605	0.788	0.076	1.06205	0.226502	4.97786	10	5541	10	2454	0.939101	0.97649	not_significant	0.0261445	0.0272875	2.7228	1.529	3.917	0.609	4.469	0	-0.0466	-0.053	-0.04	0.003	-14.085	0	0.8181	0.634	1.002	0.094	8.712	0	0.808	0.589	1.027	0.112	7.228	0	-0.5203	-1.687	0.646	0.595	-0.874	0.382	0.067
Disorders of optic nerve and visual pathways	sense organs	0.7297	-0.59	2.049	0.673	1.084	2.07446	0.554327	7.76014	11	5540	10	2454	0.278475	0.577168	not_significant	0.316905	0.555213	2.7248	1.531	3.919	0.609	4.472	0	-0.0466	-0.053	-0.04	0.003	-14.096	0	0.8174	0.633	1.001	0.094	8.703	0	0.8075	0.588	1.027	0.112	7.223	0	-0.5217	-1.688	0.645	0.595	-0.876	0.381	0.067
Disorders of penis	genitourinary	0.1437	-0.415	0.703	0.285	0.504	1.15454	0.66034	2.0198	46	5505	19	2445	0.614393	0.79585	not_significant	0.0624081	0.211554	2.7231	1.529	3.917	0.609	4.469	0	-0.0466	-0.053	-0.04	0.003	-14.089	0	0.8181	0.634	1.002	0.094	8.711	0	0.8086	0.59	1.028	0.112	7.233	0	-0.5213	-1.688	0.645	0.595	-0.876	0.381	0.0659
Disorders of phosphorus metabolism	endocrine/metabolic	1.9047	-0.13	3.939	1.038	1.835	6.71739	0.878095	51.3672	16	5535	10	2454	0.0665592	0.300406	not_significant	0.827201	1.17679	2.7164	1.522	3.91	0.609	4.459	0	-0.0464	-0.053	-0.04	0.003	-14.03	0	0.8166	0.632	1.001	0.094	8.689	0	0.8094	0.59	1.029	0.112	7.241	0	-0.5223	-1.689	0.644	0.595	-0.877	0.38	0.0667
Disorders of refraction and accommodation; blindness and low vision	sense organs	0.8354	-0.312	1.983	0.585	1.427	2.30574	0.731982	7.2645	15	5536	10	2454	0.153643	0.440111	not_significant	0.36281	0.813487	2.7315	1.537	3.926	0.609	4.482	0	-0.0468	-0.053	-0.04	0.003	-14.131	0	0.8192	0.635	1.003	0.094	8.721	0	0.8108	0.592	1.03	0.112	7.252	0	-0.5231	-1.69	0.644	0.595	-0.878	0.38	0.0635
Disorders of sacrum	musculoskeletal	0.2149	-1.215	1.644	0.729	0.295	1.23974	0.29671	5.17583	10	5541	10	2454	0.768263	0.89824	not_significant	0.0933299	0.11449	2.7225	1.528	3.917	0.609	4.468	0	-0.0466	-0.053	-0.04	0.003	-14.088	0	0.8188	0.635	1.003	0.094	8.716	0	0.8079	0.589	1.027	0.112	7.228	0	-0.5204	-1.687	0.646	0.595	-0.874	0.382	0.0666
Disorders of the autonomic nervous system	neurological	-0.0486	-1.616	1.518	0.799	-0.061	0.952562	0.198692	4.56309	10	5541	10	2454	0.951496	0.980443	not_significant	-0.0211067	0.0215929	2.7225	1.528	3.917	0.609	4.468	0	-0.0466	-0.053	-0.04	0.003	-14.085	0	0.8181	0.634	1.002	0.094	8.711	0	0.8079	0.589	1.027	0.112	7.228	0	-0.5203	-1.687	0.647	0.595	-0.874	0.382	0.0671
Disorders of the orbit	sense organs	1.5669	-0.538	3.672	1.074	1.459	4.79177	0.583915	39.3305	10	5541	10	2454	0.144614	0.42817	not_significant	0.680496	0.839791	2.7247	1.531	3.919	0.609	4.472	0	-0.0466	-0.053	-0.04	0.003	-14.093	0	0.8167	0.633	1.001	0.094	8.695	0	0.8079	0.589	1.027	0.112	7.227	0	-0.5209	-1.688	0.646	0.595	-0.875	0.382	0.0671
Disorders of the pituitary gland and its hypothalamic control	endocrine/metabolic	0.1359	-1.298	1.57	0.732	0.186	1.14557	0.273077	4.80665	10	5541	10	2454	0.852668	0.941543	not_significant	0.0590206	0.06922	2.7225	1.528	3.917	0.609	4.468	0	-0.0466	-0.053	-0.04	0.003	-14.086	0	0.8184	0.634	1.002	0.094	8.714	0	0.8079	0.589	1.027	0.112	7.228	0	-0.5203	-1.687	0.646	0.595	-0.874	0.382	0.0667
Disorders of vitreous body	sense organs	0.6119	0.153	1.07	0.234	2.616	1.84393	1.16532	2.91538	88	5463	27	2437	0.00889948	0.0839888	not_significant	0.265745	2.05064	2.7332	1.535	3.932	0.611	4.47	0	-0.0474	-0.054	-0.041	0.003	-14.249	0	0.8163	0.632	1	0.094	8.687	0	0.8106	0.591	1.03	0.112	7.247	0	-0.5043	-1.676	0.667	0.598	-0.844	0.399	0.0795
Displacement of intervertebral disc	musculoskeletal	0.1988	-0.183	0.581	0.195	1.019	1.21994	0.832768	1.78783	98	5453	42	2422	0.30807	0.582187	not_significant	0.0863377	0.511351	2.7267	1.532	3.921	0.609	4.475	0	-0.0467	-0.053	-0.04	0.003	-14.109	0	0.8179	0.634	1.002	0.094	8.708	0	0.8088	0.59	1.028	0.112	7.234	0	-0.5239	-1.691	0.643	0.595	-0.88	0.379	0.0644
Disturbance of salivary secretion	digestive	0.3708	-0.806	1.548	0.6	0.618	1.44889	0.446641	4.70206	10	5541	10	2454	0.536862	0.75871	not_significant	0.161036	0.270137	2.723	1.529	3.917	0.609	4.469	0	-0.0466	-0.053	-0.04	0.003	-14.088	0	0.818	0.634	1.002	0.094	8.71	0	0.8085	0.589	1.028	0.112	7.233	0	-0.521	-1.688	0.646	0.595	-0.875	0.382	0.0669
Disturbance of skin sensation	dermatologic	0.655	0.369	0.941	0.146	4.486	1.92514	1.44629	2.56254	235	5316	69	2395	7.24148e-06	0.000956781	mi_significant	0.284463	5.14017	2.7289	1.53	3.928	0.612	4.459	0	-0.0476	-0.054	-0.041	0.003	-14.315	0	0.8242	0.64	1.009	0.094	8.76	0	0.8249	0.605	1.044	0.112	7.366	0	-0.5134	-1.685	0.658	0.598	-0.859	0.39	0.075
Disturbances of sensation of smell and taste	neurological	0.4758	-0.484	1.435	0.489	0.972	1.6093	0.616313	4.19965	19	5532	10	2454	0.331062	0.604937	not_significant	0.206637	0.480091	2.7236	1.529	3.918	0.609	4.47	0	-0.0466	-0.053	-0.04	0.003	-14.093	0	0.8189	0.635	1.003	0.094	8.72	0	0.8088	0.59	1.028	0.112	7.235	0	-0.5211	-1.688	0.646	0.595	-0.875	0.381	0.0648
Diverticulitis	digestive	0.3323	-0.501	1.165	0.425	0.782	1.39417	0.605924	3.20592	18	5533	10	2454	0.434469	0.695162	not_significant	0.144316	0.362042	2.7259	1.532	3.92	0.609	4.473	0	-0.0467	-0.053	-0.04	0.003	-14.103	0	0.8188	0.635	1.003	0.094	8.718	0	0.8084	0.589	1.028	0.112	7.232	0	-0.5216	-1.689	0.645	0.595	-0.876	0.381	0.0662
Diverticulosis	digestive	0.2415	-0.092	0.575	0.17	1.418	1.27316	0.912105	1.77713	110	5441	60	2404	0.156251	0.44426	not_significant	0.104882	0.806176	2.7432	1.548	3.938	0.61	4.499	0	-0.0471	-0.054	-0.041	0.003	-14.153	0	0.8178	0.634	1.002	0.094	8.705	0	0.8105	0.591	1.03	0.112	7.248	0	-0.5243	-1.692	0.643	0.596	-0.88	0.379	0.0627
Dizziness and giddiness (Light-headedness and vertigo)	sense organs	0.2605	-0.032	0.553	0.149	1.745	1.29758	0.968507	1.73846	183	5368	73	2391	0.0809244	0.321568	not_significant	0.113134	1.09192	2.7334	1.539	3.928	0.61	4.484	0	-0.0469	-0.053	-0.04	0.003	-14.154	0	0.8214	0.637	1.006	0.094	8.74	0	0.8148	0.596	1.034	0.112	7.283	0	-0.5295	-1.697	0.638	0.596	-0.889	0.374	0.0565
Drusen (degenerative) of retina	sense organs	0.7369	-0.629	2.102	0.697	1.058	2.08945	0.533125	8.18252	10	5541	10	2454	0.290238	0.578862	not_significant	0.320032	0.537246	2.7307	1.536	3.925	0.609	4.481	0	-0.0468	-0.053	-0.04	0.003	-14.121	0	0.8173	0.633	1.001	0.094	8.701	0	0.8083	0.589	1.027	0.112	7.231	0	-0.5213	-1.688	0.646	0.595	-0.876	0.381	0.0655
Dry eyes	sense organs	1.6776	0.872	2.483	0.411	4.084	5.35269	2.39169	11.9771	72	5479	10	2454	4.43032e-05	0.00203602	mi_significant	0.728572	4.35356	2.758	1.563	3.953	0.61	4.523	0	-0.0474	-0.054	-0.041	0.003	-14.28	0	0.8143	0.63	0.999	0.094	8.66	0	0.8143	0.595	1.034	0.112	7.276	0	-0.5329	-1.7	0.635	0.596	-0.895	0.371	0.0518
Duodenal ulcer	digestive	0.3589	-1.301	2.019	0.847	0.424	1.43175	0.272259	7.53079	10	5541	10	2454	0.6718	0.833572	not_significant	0.155868	0.17276	2.7232	1.529	3.917	0.609	4.469	0	-0.0466	-0.053	-0.04	0.003	-14.089	0	0.8182	0.634	1.002	0.094	8.712	0	0.8085	0.589	1.028	0.112	7.233	0	-0.5209	-1.688	0.646	0.595	-0.875	0.382	0.0664
Duodenitis	digestive	0.2188	-0.787	1.224	0.513	0.426	1.24458	0.455208	3.40076	14	5537	10	2454	0.669758	0.832863	not_significant	0.0950236	0.174082	2.7239	1.53	3.918	0.609	4.471	0	-0.0466	-0.053	-0.04	0.003	-14.092	0	0.818	0.634	1.002	0.094	8.71	0	0.808	0.589	1.027	0.112	7.229	0	-0.5208	-1.688	0.646	0.595	-0.875	0.382	0.0665
Dyshidrosis	dermatologic	-0.2518	-1.298	0.795	0.534	-0.472	0.7774	0.273077	2.21444	14	5537	10	2454	0.637215	0.810574	not_significant	-0.109355	0.195714	2.7232	1.529	3.917	0.609	4.47	0	-0.0466	-0.053	-0.04	0.003	-14.087	0	0.8174	0.633	1.002	0.094	8.702	0	0.8069	0.588	1.026	0.112	7.217	0	-0.5196	-1.686	0.647	0.595	-0.873	0.383	0.0688
Dysmetabolic syndrome X	endocrine/metabolic	1.1119	0.038	2.186	0.548	2.03	3.04013	1.03873	8.89954	29	5522	10	2454	0.0423877	0.233353	not_significant	0.482892	1.37276	2.7289	1.535	3.923	0.609	4.479	0	-0.0467	-0.053	-0.04	0.003	-14.115	0	0.8155	0.631	1	0.094	8.682	0	0.8089	0.59	1.028	0.112	7.235	0	-0.5236	-1.69	0.643	0.595	-0.879	0.379	0.0624
Dyspepsia and other specified disorders of function of stomach	digestive	1.1154	0.208	2.023	0.463	2.41	3.05079	1.23121	7.56097	32	5519	10	2454	0.0159627	0.122265	not_significant	0.484412	1.79689	2.7307	1.536	3.925	0.609	4.48	0	-0.0468	-0.053	-0.04	0.003	-14.133	0	0.8195	0.635	1.004	0.094	8.721	0	0.8122	0.593	1.031	0.112	7.262	0	-0.5259	-1.693	0.641	0.595	-0.883	0.377	0.0625
Dysphagia	digestive	0.2823	-0.129	0.694	0.21	1.344	1.32618	0.878974	2.00171	85	5466	37	2427	0.179011	0.468353	not_significant	0.122601	0.74712	2.7233	1.527	3.919	0.61	4.462	0	-0.0468	-0.053	-0.04	0.003	-14.138	0	0.8181	0.634	1.002	0.094	8.71	0	0.81	0.591	1.029	0.112	7.245	0	-0.5144	-1.683	0.654	0.596	-0.863	0.388	0.0732
Dysplasia of prostate	genitourinary	-0.0919	-2.933	2.749	1.45	-0.063	0.912196	0.0532371	15.627	10	5541	10	2454	0.949456	0.980443	not_significant	-0.0399117	0.022525	2.7224	1.528	3.917	0.609	4.468	0	-0.0466	-0.053	-0.04	0.003	-14.084	0	0.8182	0.634	1.002	0.094	8.712	0	0.808	0.589	1.027	0.112	7.228	0	-0.5203	-1.687	0.647	0.595	-0.874	0.382	0.067
Dysthymic disorder	mental disorders	0.5949	-0.466	1.656	0.541	1.099	1.81285	0.627507	5.23832	15	5536	10	2454	0.271631	0.569565	not_significant	0.258362	0.56602	2.7247	1.53	3.919	0.609	4.471	0	-0.0466	-0.053	-0.04	0.003	-14.103	0	0.8197	0.636	1.004	0.094	8.726	0	0.8095	0.59	1.029	0.112	7.241	0	-0.5208	-1.688	0.646	0.595	-0.875	0.382	0.0645
Dysuria	genitourinary	0.5679	0.167	0.969	0.204	2.778	1.76456	1.18175	2.63531	119	5432	35	2429	0.00547176	0.0602463	not_significant	0.246636	2.26187	2.7378	1.543	3.933	0.61	4.491	0	-0.047	-0.053	-0.041	0.003	-14.189	0	0.8224	0.638	1.007	0.094	8.748	0	0.818	0.599	1.037	0.112	7.308	0	-0.5311	-1.699	0.636	0.596	-0.891	0.373	0.0523
E. coli	infectious diseases	0.6244	-0.993	2.242	0.825	0.757	1.86713	0.370464	9.41214	10	5541	10	2454	0.449152	0.709647	not_significant	0.271173	0.347607	2.7239	1.53	3.918	0.609	4.47	0	-0.0466	-0.053	-0.04	0.003	-14.094	0	0.8189	0.635	1.003	0.094	8.718	0	0.8098	0.591	1.029	0.112	7.243	0	-0.522	-1.689	0.645	0.595	-0.877	0.381	0.0657
Edema	symptoms	1.2305	0.714	1.747	0.264	4.667	3.42294	2.04214	5.73736	94	5457	19	2445	3.06235e-06	0.000555712	mi_significant	0.534399	5.51394	2.7767	1.581	3.973	0.61	4.551	0	-0.0479	-0.054	-0.041	0.003	-14.391	0	0.8165	0.632	1.001	0.094	8.674	0	0.8128	0.593	1.032	0.112	7.257	0	-0.5298	-1.698	0.638	0.596	-0.889	0.374	0.0551
Effects of heat, cold and air pressure		0.0923	-1.012	1.197	0.564	0.164	1.09669	0.363491	3.31017	11	5540	10	2454	0.869922	0.947222	not_significant	0.0400854	0.0605198	2.7226	1.528	3.917	0.609	4.469	0	-0.0466	-0.053	-0.04	0.003	-14.086	0	0.8181	0.634	1.002	0.094	8.712	0	0.808	0.589	1.027	0.112	7.229	0	-0.5205	-1.687	0.646	0.595	-0.874	0.382	0.0669
Effects of other external causes		0.3301	-0.507	1.167	0.427	0.773	1.39111	0.6023	3.21234	20	5531	10	2454	0.439412	0.697386	not_significant	0.143361	0.357128	2.7248	1.53	3.919	0.609	4.471	0	-0.0467	-0.053	-0.04	0.003	-14.101	0	0.8203	0.636	1.004	0.094	8.73	0	0.8099	0.591	1.029	0.112	7.243	0	-0.5214	-1.688	0.646	0.595	-0.876	0.381	0.0645
Elevated C-reactive protein (CRP)	symptoms	-0.034	-1.282	1.214	0.637	-0.053	0.966572	0.277482	3.36693	11	5540	10	2454	0.957462	0.980443	not_significant	-0.014766	0.0188786	2.7226	1.528	3.917	0.609	4.469	0	-0.0466	-0.053	-0.04	0.003	-14.086	0	0.8181	0.634	1.002	0.094	8.71	0	0.8079	0.589	1.027	0.112	7.226	0	-0.5202	-1.687	0.647	0.595	-0.874	0.382	0.0672
Elevated prostate specific antigen [PSA]	genitourinary	1.061	0.486	1.637	0.294	3.613	2.88926	1.6258	5.13973	49	5502	17	2447	0.000302131	0.00863114	mi_significant	0.460786	3.51981	2.8037	1.606	4.001	0.611	4.59	0	-0.0485	-0.055	-0.042	0.003	-14.458	0	0.8162	0.632	1.001	0.094	8.681	0	0.8096	0.59	1.029	0.112	7.235	0	-0.5286	-1.698	0.64	0.596	-0.886	0.375	0.06
Elevated sedimentation rate	symptoms	-0.5569	-2.513	1.4	0.998	-0.558	0.572983	0.0810248	4.0552	10	5541	10	2454	0.576964	0.776965	not_significant	-0.241859	0.238851	2.7212	1.527	3.915	0.609	4.466	0	-0.0465	-0.053	-0.04	0.003	-14.071	0	0.8182	0.634	1.002	0.094	8.713	0	0.8079	0.589	1.027	0.112	7.228	0	-0.5202	-1.687	0.647	0.595	-0.874	0.382	0.0689
Elevated white blood cell count	hematopoietic	1.1442	0.445	1.843	0.357	3.207	3.13993	1.56049	6.31546	57	5494	10	2454	0.00133986	0.0249748	mi_significant	0.49692	2.87294	2.734	1.539	3.929	0.61	4.485	0	-0.0469	-0.053	-0.04	0.003	-14.155	0	0.8195	0.635	1.004	0.094	8.717	0	0.8148	0.595	1.034	0.112	7.282	0	-0.5294	-1.697	0.638	0.596	-0.889	0.374	0.0589
Emphysema	respiratory	0.1434	-2.492	2.779	1.345	0.107	1.15419	0.0827443	16.1029	10	5541	10	2454	0.915056	0.964322	not_significant	0.0622778	0.0385522	2.7228	1.529	3.917	0.609	4.469	0	-0.0466	-0.053	-0.04	0.003	-14.086	0	0.8181	0.634	1.002	0.094	8.712	0	0.808	0.589	1.027	0.112	7.228	0	-0.5203	-1.687	0.646	0.595	-0.874	0.382	0.067
Empyema and pneumothorax	respiratory	0.7971	-0.519	2.114	0.672	1.187	2.2191	0.595115	8.2813	11	5540	10	2454	0.235342	0.536113	not_significant	0.346176	0.628301	2.7239	1.53	3.918	0.609	4.471	0	-0.0466	-0.053	-0.04	0.003	-14.094	0	0.818	0.634	1.002	0.094	8.71	0	0.8088	0.59	1.028	0.112	7.234	0	-0.521	-1.688	0.646	0.595	-0.875	0.381	0.0663
Encephalitis	neurological	0.9136	-1.587	3.414	1.276	0.716	2.49328	0.204538	30.3865	10	5541	10	2454	0.473915	0.727476	not_significant	0.396771	0.324299	2.7264	1.532	3.921	0.609	4.474	0	-0.0467	-0.053	-0.04	0.003	-14.102	0	0.818	0.634	1.002	0.094	8.709	0	0.808	0.589	1.027	0.112	7.228	0	-0.5205	-1.687	0.646	0.595	-0.874	0.382	0.0669
Encephalopathy, not elsewhere classified	neurological	1.9	-0.181	3.981	1.062	1.79	6.68589	0.834435	53.5706	10	5541	10	2454	0.0735164	0.311567	not_significant	0.82516	1.13362	2.725	1.53	3.92	0.609	4.471	0	-0.0467	-0.053	-0.04	0.003	-14.106	0	0.8216	0.637	1.006	0.094	8.74	0	0.8118	0.593	1.031	0.112	7.259	0	-0.5223	-1.689	0.645	0.595	-0.877	0.38	0.0639
End stage renal disease	genitourinary	1.3019	-0.381	2.984	0.858	1.517	3.67627	0.683178	19.7667	10	5541	10	2454	0.129352	0.405713	not_significant	0.565408	0.888226	2.626	1.448	3.804	0.601	4.368	0	-0.0468	-0.053	-0.04	0.003	-14.146	0	0.8216	0.637	1.006	0.094	8.745	0	0.8108	0.592	1.03	0.112	7.252	0	-0.4158	-1.568	0.736	0.588	-0.707	0.479	0.1705
Endocarditis	circulatory system	-0.2034	-1.697	1.29	0.762	-0.267	0.815952	0.183232	3.63279	10	5541	10	2454	0.78947	0.909999	not_significant	-0.0883355	0.102665	2.7219	1.528	3.916	0.609	4.467	0	-0.0466	-0.053	-0.04	0.003	-14.083	0	0.8187	0.635	1.003	0.094	8.716	0	0.8079	0.589	1.027	0.112	7.228	0	-0.5199	-1.687	0.647	0.595	-0.873	0.382	0.067
Enthesopathy	musculoskeletal	0.0847	-0.204	0.374	0.147	0.575	1.08839	0.815462	1.45354	165	5386	79	2385	0.565462	0.771218	not_significant	0.0367847	0.247596	2.7266	1.532	3.921	0.609	4.474	0	-0.0467	-0.053	-0.04	0.003	-14.097	0	0.8184	0.634	1.002	0.094	8.714	0	0.8083	0.589	1.027	0.112	7.231	0	-0.5222	-1.689	0.645	0.595	-0.877	0.38	0.0641
Eosinophilia	hematopoietic	1.0774	-1.153	3.308	1.138	0.947	2.93703	0.315688	27.3304	10	5541	10	2454	0.343764	0.620066	not_significant	0.467909	0.463739	2.7248	1.531	3.919	0.609	4.472	0	-0.0466	-0.053	-0.04	0.003	-14.099	0	0.8184	0.634	1.003	0.094	8.713	0	0.8093	0.59	1.028	0.112	7.239	0	-0.5217	-1.689	0.645	0.595	-0.876	0.381	0.0668
Eosinophilic esophagitis	digestive	0.1494	-0.946	1.245	0.559	0.267	1.16114	0.388291	3.47293	11	5540	10	2454	0.789294	0.909999	not_significant	0.0648836	0.102761	2.7226	1.528	3.917	0.609	4.468	0	-0.0466	-0.053	-0.04	0.003	-14.086	0	0.8183	0.634	1.002	0.094	8.714	0	0.8082	0.589	1.027	0.112	7.23	0	-0.5206	-1.687	0.646	0.595	-0.875	0.382	0.0667
Epilepsy	neurological	0.6767	-0.626	1.979	0.665	1.018	1.96737	0.534726	7.2355	12	5539	10	2454	0.308532	0.582187	not_significant	0.293887	0.510699	2.7222	1.528	3.916	0.609	4.468	0	-0.0466	-0.053	-0.04	0.003	-14.083	0	0.8182	0.634	1.002	0.094	8.711	0	0.8087	0.59	1.028	0.112	7.235	0	-0.5209	-1.688	0.646	0.595	-0.875	0.382	0.066
Epilepsy, recurrent seizures, convulsions	neurological	1.1363	-0.135	2.407	0.648	1.752	3.11522	0.873716	11.1006	15	5536	10	2454	0.0796943	0.320454	not_significant	0.493489	1.09857	2.7251	1.531	3.919	0.609	4.472	0	-0.0466	-0.053	-0.04	0.003	-14.101	0	0.8186	0.635	1.003	0.094	8.715	0	0.8086	0.589	1.028	0.112	7.233	0	-0.5213	-1.688	0.646	0.595	-0.876	0.381	0.0659
Epistaxis or throat hemorrhage	respiratory	0.5406	-0.044	1.125	0.298	1.812	1.71704	0.956954	3.08022	56	5495	16	2448	0.0699274	0.304228	not_significant	0.23478	1.15535	2.7115	1.514	3.909	0.611	4.438	0	-0.0467	-0.053	-0.04	0.003	-14.124	0	0.8175	0.633	1.002	0.094	8.703	0	0.81	0.591	1.029	0.112	7.245	0	-0.5063	-1.677	0.664	0.597	-0.848	0.396	0.08
Erectile dysfunction [ED]	genitourinary	0.2351	-0.051	0.521	0.146	1.612	1.26504	0.950279	1.68371	177	5374	78	2386	0.106911	0.369296	not_significant	0.102103	0.970979	2.7409	1.546	3.936	0.61	4.495	0	-0.047	-0.054	-0.041	0.003	-14.163	0	0.8207	0.637	1.005	0.094	8.734	0	0.8144	0.595	1.034	0.112	7.279	0	-0.5302	-1.698	0.637	0.596	-0.89	0.373	0.0578
Esophageal bleeding (varices/hemorrhage)	digestive	0.9463	-0.7	2.593	0.84	1.126	2.57616	0.496585	13.3698	10	5541	10	2454	0.259955	0.561425	not_significant	0.410973	0.585103	2.7293	1.535	3.924	0.609	4.479	0	-0.0467	-0.053	-0.04	0.003	-14.118	0	0.8168	0.633	1.001	0.094	8.696	0	0.8082	0.589	1.027	0.112	7.23	0	-0.5216	-1.688	0.645	0.595	-0.876	0.381	0.0668
Esophagitis, GERD and related diseases	digestive	0.3129	-0.907	1.533	0.623	0.503	1.36738	0.403734	4.63205	10	5541	10	2454	0.615179	0.795893	not_significant	0.135891	0.210998	2.7232	1.529	3.917	0.609	4.47	0	-0.0466	-0.053	-0.04	0.003	-14.09	0	0.8182	0.634	1.002	0.094	8.712	0	0.8081	0.589	1.027	0.112	7.229	0	-0.5207	-1.688	0.646	0.595	-0.875	0.382	0.0666
Essential hypertension	circulatory system	0.4888	0.271	0.706	0.111	4.404	1.63036	1.31128	2.02587	380	5171	130	2334	1.06228e-05	0.00112284	mi_significant	0.212283	4.97376	2.7655	1.572	3.959	0.609	4.541	0	-0.0484	-0.055	-0.042	0.003	-14.49	0	0.814	0.63	0.998	0.094	8.652	0	0.822	0.603	1.042	0.112	7.34	0	-0.5143	-1.68	0.652	0.595	-0.865	0.387	0.0705
Essential tremor	neurological	0.5714	-0.44	1.583	0.516	1.107	1.77074	0.644036	4.86954	13	5538	10	2454	0.26816	0.568026	not_significant	0.248156	0.571606	2.7296	1.535	3.924	0.609	4.479	0	-0.0468	-0.053	-0.04	0.003	-14.122	0	0.819	0.635	1.003	0.094	8.719	0	0.8105	0.591	1.03	0.112	7.249	0	-0.5228	-1.69	0.644	0.595	-0.878	0.38	0.066
Eustachian tube disorders	sense organs	-0.1385	-0.58	0.303	0.225	-0.615	0.870663	0.559898	1.35391	63	5488	35	2429	0.538476	0.75871	not_significant	-0.0601498	0.268834	2.73	1.536	3.924	0.609	4.481	0	-0.0465	-0.053	-0.04	0.003	-14.074	0	0.8177	0.634	1.002	0.094	8.707	0	0.8078	0.589	1.027	0.112	7.227	0	-0.5279	-1.695	0.639	0.595	-0.887	0.375	0.0607
Extrapyramidal disease and abnormal movement disorders	neurological	0.0949	-0.937	1.126	0.526	0.18	1.09955	0.391801	3.0833	10	5541	10	2454	0.85692	0.941543	not_significant	0.0412145	0.0670598	2.7173	1.521	3.913	0.61	4.454	0	-0.0466	-0.053	-0.04	0.003	-14.087	0	0.8183	0.634	1.002	0.094	8.713	0	0.8079	0.589	1.027	0.112	7.228	0	-0.5149	-1.683	0.654	0.596	-0.864	0.388	0.0725
Eye infection, viral	sense organs	0.1936	-0.623	1.01	0.416	0.465	1.21361	0.536333	2.7456	24	5527	10	2454	0.642022	0.812715	not_significant	0.0840794	0.19245	2.7225	1.528	3.917	0.609	4.468	0	-0.0466	-0.053	-0.04	0.003	-14.087	0	0.8187	0.635	1.003	0.094	8.716	0	0.8084	0.589	1.027	0.112	7.231	0	-0.5207	-1.688	0.646	0.595	-0.875	0.382	0.0658
Facial nerve disorders [CN7]	neurological	-0.2801	-1.388	0.828	0.565	-0.495	0.755708	0.249574	2.28874	10	5541	10	2454	0.620379	0.799684	not_significant	-0.121646	0.207343	2.7228	1.529	3.917	0.609	4.469	0	-0.0466	-0.053	-0.04	0.003	-14.082	0	0.8165	0.632	1.001	0.094	8.689	0	0.8063	0.587	1.025	0.112	7.21	0	-0.5195	-1.686	0.647	0.595	-0.873	0.383	0.069
Facial weakness	symptoms	-0.1289	-1.11	0.852	0.501	-0.258	0.879062	0.329559	2.34433	13	5538	10	2454	0.796788	0.912465	not_significant	-0.0559806	0.0986571	2.7226	1.528	3.917	0.609	4.469	0	-0.0466	-0.053	-0.04	0.003	-14.084	0	0.8177	0.634	1.002	0.094	8.705	0	0.8074	0.588	1.027	0.112	7.222	0	-0.5198	-1.687	0.647	0.595	-0.873	0.383	0.0678
Fasciitis	musculoskeletal	0.5278	0.054	1.002	0.242	2.182	1.6952	1.05548	2.72372	78	5473	25	2439	0.0290915	0.181951	not_significant	0.229221	1.53623	2.7321	1.537	3.927	0.61	4.482	0	-0.0469	-0.053	-0.04	0.003	-14.146	0	0.8225	0.638	1.007	0.094	8.753	0	0.8127	0.593	1.032	0.112	7.267	0	-0.5266	-1.694	0.641	0.596	-0.884	0.377	0.0577
[truncated: 667 more rows]
[truncated: 24 more columns]

## Sheet: after_hosp
phenotype	phecode_category	coef_has_phenotype	ci_lb_has_phenotype	ci_ub_has_phenotype	std err_has_phenotype	z_has_phenotype	odds_ratio_has_phenotype	ci_lb_or_has_phenotype	ci_ub_or_has_phenotype	Count_mi	Count_r_mi	Count_con	Count_r_con	pval_has_phenotype	pval_BH_adj_has_phenotype	significance_bh	log10_OR_has_phenotype	-log10_pval_has_phenotype	coef_Intercept	ci_lb_Intercept	ci_ub_Intercept	std err_Intercept	z_Intercept	pval_Intercept	coef_mi_or_vas_est_age	ci_lb_mi_or_vas_est_age	ci_ub_mi_or_vas_est_age	std err_mi_or_vas_est_age	z_mi_or_vas_est_age	pval_mi_or_vas_est_age	coef_num_visits_after	ci_lb_num_visits_after	ci_ub_num_visits_after	std err_num_visits_after	z_num_visits_after	pval_num_visits_after	coef_emr_months_after	ci_lb_emr_months_after	ci_ub_emr_months_after	std err_emr_months_after	z_emr_months_after	pval_emr_months_after	converged
[truncated: 1,057 more rows]

[truncated: 1 more sheets: legend]
