# Supplementary material for: Leveraging Electronic Medical Records from Two Hospital Systems Identifies Male Infertility Associated Comorbidities Across Time
Source: Research Square preprint supplement (doi:10.21203/rs.3.rs-3706493/v1), 2023-12-07
Supplement: Supplementary file 15 [file e25f24eddedf7ae1a5f2acd1.xlsx]

## Sheet: after_primary
phenotype	phecode_category	coef_has_phenotype	ci_lb_has_phenotype	ci_ub_has_phenotype	std err_has_phenotype	z_has_phenotype	odds_ratio_has_phenotype	ci_lb_or_has_phenotype	ci_ub_or_has_phenotype	Count_mi	Count_r_mi	Count_con	Count_r_con	pval_has_phenotype	pval_BH_adj_has_phenotype	significance_bh	log10_OR_has_phenotype	-log10_pval_has_phenotype	coef_Intercept	ci_lb_Intercept	ci_ub_Intercept	std err_Intercept	z_Intercept	pval_Intercept	coef_mi_or_vas_est_age	ci_lb_mi_or_vas_est_age	ci_ub_mi_or_vas_est_age	std err_mi_or_vas_est_age	z_mi_or_vas_est_age	pval_mi_or_vas_est_age	coef_location_source_value[T.1]	ci_lb_location_source_value[T.1]	ci_ub_location_source_value[T.1]	std err_location_source_value[T.1]	z_location_source_value[T.1]	pval_location_source_value[T.1]	coef_location_source_value[T.2]	ci_lb_location_source_value[T.2]	ci_ub_location_source_value[T.2]	std err_location_source_value[T.2]	z_location_source_value[T.2]	pval_location_source_value[T.2]	coef_location_source_value[T.4]	ci_lb_location_source_value[T.4]	ci_ub_location_source_value[T.4]	std err_location_source_value[T.4]	z_location_source_value[T.4]	pval_location_source_value[T.4]	coef_location_source_value[T.5]
Abdominal aortic aneurysm	circulatory system	0.5691	-1.842	2.98	1.23	0.463	1.76668	0.1585	19.6878	10	6521	10	8343	0.643656	0.783402	not_significant	0.247157	0.191346	1.4348	1.236	1.633	0.101	14.152	0	-0.0499	-0.055	-0.045	0.002	-20.552	0	0.4417	0.305	0.578	0.07	6.328	0	0.2902	0.178	0.402	0.057	5.068	0	1.1259	1.019	1.233	0.054	20.7	0	-0.1533
Abdominal hernia	digestive	-0.4271	-1.66	0.806	0.629	-0.679	0.652398	0.190139	2.23893	10	6521	10	8343	0.497065	0.692434	not_significant	-0.185487	0.303587	1.4326	1.234	1.631	0.101	14.142	0	-0.0498	-0.055	-0.045	0.002	-20.543	0	0.4423	0.306	0.579	0.07	6.339	0	0.2897	0.178	0.402	0.057	5.059	0	1.1259	1.019	1.232	0.054	20.7	0	-0.1534
Abdominal pain	symptoms	0.2255	0.092	0.359	0.068	3.315	1.25295	1.09636	1.4319	464	6067	559	7794	0.000914931	0.00834165	mi_significant	0.0979334	3.03861	1.4199	1.221	1.619	0.101	14	0	-0.05	-0.055	-0.045	0.002	-20.614	0	0.4557	0.319	0.593	0.07	6.519	0	0.2972	0.185	0.41	0.057	5.184	0	1.136	1.029	1.243	0.055	20.84	0	-0.152
Abnormal arterial blood gases	symptoms	1.5212	-0.904	3.946	1.237	1.229	4.57772	0.404947	51.728	10	6521	10	8343	0.218898	0.405867	not_significant	0.660649	0.659758	1.4335	1.235	1.632	0.101	14.149	0	-0.0498	-0.055	-0.045	0.002	-20.556	0	0.4427	0.306	0.579	0.07	6.346	0	0.2902	0.178	0.402	0.057	5.068	0	1.1259	1.019	1.232	0.054	20.7	0	-0.1544
Abnormal chest sounds		-0.2155	-1.96	1.528	0.89	-0.242	0.806138	0.140858	4.60895	10	6521	10	8343	0.808603	0.892008	not_significant	-0.0935905	0.0922648	1.433	1.234	1.632	0.101	14.146	0	-0.0498	-0.055	-0.045	0.002	-20.552	0	0.4426	0.306	0.579	0.07	6.345	0	0.2901	0.178	0.402	0.057	5.066	0	1.1258	1.019	1.232	0.054	20.699	0	-0.1533
Abnormal coagulation profile	hematopoietic	0.902	0.093	1.711	0.413	2.186	2.46453	1.09746	5.53449	17	6514	12	8341	0.0288148	0.102144	not_significant	0.391734	1.54038	1.4348	1.236	1.633	0.101	14.162	0	-0.05	-0.055	-0.045	0.002	-20.598	0	0.4433	0.307	0.58	0.07	6.354	0	0.2926	0.18	0.405	0.057	5.107	0	1.1278	1.021	1.234	0.054	20.726	0	-0.1518
Abnormal electrocardiogram [ECG] [EKG]	circulatory system	0.3907	0.094	0.688	0.151	2.58	1.47802	1.09856	1.98973	90	6441	109	8244	0.00986847	0.0474404	mi_significant	0.169679	2.00575	1.4423	1.244	1.641	0.101	14.225	0	-0.0502	-0.055	-0.045	0.002	-20.666	0	0.4461	0.309	0.583	0.07	6.392	0	0.2917	0.179	0.404	0.057	5.093	0	1.1287	1.022	1.235	0.054	20.742	0	-0.1536
Abnormal findings examination of lungs	respiratory	0.6634	0.4	0.927	0.134	4.939	1.94138	1.49182	2.52692	127	6404	126	8227	7.84683e-07	3.70482e-05	mi_significant	0.288111	6.10531	1.4548	1.256	1.654	0.101	14.347	0	-0.0507	-0.055	-0.046	0.002	-20.86	0	0.4459	0.309	0.583	0.07	6.386	0	0.293	0.181	0.405	0.057	5.113	0	1.1346	1.028	1.241	0.054	20.831	0	-0.1539
Abnormal findings on exam of gastrointestinal tract/ abdominal area	digestive	0.4289	-0.149	1.007	0.295	1.454	1.53557	0.861569	2.73738	24	6507	26	8327	0.14603	0.313396	not_significant	0.186269	0.835558	1.4313	1.233	1.63	0.101	14.128	0	-0.0499	-0.055	-0.045	0.002	-20.57	0	0.4454	0.309	0.582	0.07	6.382	0	0.2922	0.18	0.405	0.057	5.101	0	1.1289	1.022	1.236	0.054	20.736	0	-0.1508
Abnormal findings on examination of urine	genitourinary	0.4378	-2.337	3.212	1.415	0.309	1.5493	0.0966171	24.8287	10	6521	10	8343	0.757086	0.859114	not_significant	0.190134	0.120855	1.4327	1.234	1.631	0.101	14.142	0	-0.0498	-0.055	-0.045	0.002	-20.551	0	0.4429	0.306	0.58	0.07	6.349	0	0.2904	0.178	0.403	0.057	5.07	0	1.126	1.019	1.233	0.054	20.701	0	-0.1533
Abnormal findings on study of brain and/or nervous system	neurological	-0.0811	-1.019	0.856	0.478	-0.169	0.922101	0.360956	2.35373	10	6521	14	8339	0.865432	0.926397	not_significant	-0.0352213	0.0627673	1.4333	1.235	1.632	0.101	14.147	0	-0.0498	-0.055	-0.045	0.002	-20.547	0	0.4422	0.305	0.579	0.07	6.331	0	0.2896	0.177	0.402	0.057	5.049	0	1.1253	1.018	1.232	0.054	20.653	0	-0.1539
Abnormal function study of cardiovascular system	circulatory system	0.7096	0.126	1.293	0.298	2.383	2.03318	1.13428	3.6437	22	6509	27	8326	0.0171653	0.0711365	not_significant	0.308175	1.76535	1.4435	1.245	1.642	0.101	14.23	0	-0.0502	-0.055	-0.045	0.002	-20.646	0	0.443	0.306	0.58	0.07	6.35	0	0.2914	0.179	0.404	0.057	5.087	0	1.1285	1.022	1.235	0.054	20.74	0	-0.1541
Abnormal granulation tissue	dermatologic	1.3092	0.002	2.617	0.667	1.962	3.70321	1.002	13.6946	10	6521	10	8343	0.0497274	0.145442	not_significant	0.568578	1.3034	1.4344	1.236	1.633	0.101	14.161	0	-0.0499	-0.055	-0.045	0.002	-20.578	0	0.4429	0.306	0.58	0.07	6.348	0	0.2908	0.179	0.403	0.057	5.077	0	1.1267	1.02	1.233	0.054	20.712	0	-0.1539
Abnormal heart sounds	circulatory system	0.2933	-0.2	0.787	0.252	1.164	1.34084	0.818731	2.1968	33	6498	39	8314	0.244258	0.434018	not_significant	0.127379	0.612151	1.4345	1.236	1.633	0.101	14.157	0	-0.0499	-0.055	-0.045	0.002	-20.572	0	0.4433	0.307	0.58	0.07	6.354	0	0.2908	0.179	0.403	0.057	5.078	0	1.1261	1.019	1.233	0.054	20.702	0	-0.1538
Abnormal involuntary movements	neurological	0.485	0.169	0.801	0.161	3.006	1.62418	1.18412	2.22777	84	6447	88	8265	0.00265126	0.0186434	mi_significant	0.210633	2.57655	1.441	1.242	1.64	0.101	14.211	0	-0.0502	-0.055	-0.045	0.002	-20.652	0	0.4444	0.308	0.581	0.07	6.368	0	0.2914	0.179	0.404	0.057	5.087	0	1.1272	1.021	1.234	0.054	20.715	0	-0.1559
Abnormal posture	symptoms	0.2008	-0.678	1.079	0.448	0.448	1.22238	0.507631	2.94174	10	6521	14	8339	0.654238	0.789866	not_significant	0.0872063	0.184264	1.433	1.234	1.632	0.101	14.147	0	-0.0498	-0.055	-0.045	0.002	-20.555	0	0.4428	0.306	0.58	0.07	6.347	0	0.29	0.178	0.402	0.057	5.063	0	1.1259	1.019	1.232	0.054	20.7	0	-0.1539
Abnormal reflex	neurological	0.7395	-0.509	1.989	0.637	1.161	2.09489	0.601096	7.30822	10	6521	10	8343	0.245832	0.435643	not_significant	0.321161	0.609361	1.4323	1.234	1.631	0.101	14.138	0	-0.0498	-0.055	-0.045	0.002	-20.55	0	0.4421	0.305	0.579	0.07	6.337	0	0.2905	0.178	0.403	0.057	5.072	0	1.1258	1.019	1.232	0.054	20.698	0	-0.1533
Abnormal results of function study of kidney	genitourinary	1.0315	0.157	1.905	0.446	2.313	2.80527	1.17	6.71941	12	6519	10	8343	0.0207245	0.0810578	not_significant	0.447975	1.68352	1.4403	1.242	1.639	0.101	14.209	0	-0.0501	-0.055	-0.045	0.002	-20.622	0	0.4436	0.307	0.58	0.07	6.358	0	0.2904	0.178	0.403	0.057	5.071	0	1.1266	1.02	1.233	0.054	20.71	0	-0.1545
Abnormal results of function study of liver	digestive	0.4125	-0.123	0.948	0.273	1.509	1.51059	0.884264	2.58054	30	6501	28	8325	0.131211	0.289101	not_significant	0.179146	0.882031	1.4309	1.232	1.629	0.101	14.124	0	-0.0498	-0.055	-0.045	0.002	-20.556	0	0.4437	0.307	0.58	0.07	6.36	0	0.2907	0.178	0.403	0.057	5.075	0	1.1273	1.021	1.234	0.054	20.72	0	-0.1524
Abnormal results of function study of pulmonary system	respiratory	1.1545	0.039	2.27	0.569	2.028	3.17244	1.03977	9.6794	10	6521	10	8343	0.0425106	0.131923	not_significant	0.501393	1.3715	1.4323	1.234	1.631	0.101	14.135	0	-0.0499	-0.055	-0.045	0.002	-20.562	0	0.4441	0.307	0.581	0.07	6.365	0	0.2912	0.179	0.403	0.057	5.083	0	1.1275	1.021	1.234	0.054	20.724	0	-0.1521
Abnormal results of function study of thyroid	endocrine/metabolic	0.7694	0.095	1.444	0.344	2.235	2.15847	1.09966	4.23761	21	6510	17	8336	0.0254217	0.0938757	not_significant	0.334146	1.5948	1.4377	1.239	1.636	0.101	14.189	0	-0.05	-0.055	-0.045	0.002	-20.619	0	0.4437	0.307	0.58	0.07	6.358	0	0.2913	0.179	0.404	0.057	5.086	0	1.1276	1.021	1.234	0.054	20.722	0	-0.1514
Abnormal results of other function studies (bladder, pancreas, placenta, spleen, etc)	symptoms	1.5692	0.137	3.002	0.731	2.147	4.8028	1.14683	20.1257	10	6521	10	8343	0.0318091	0.108102	not_significant	0.681495	1.49745	1.4421	1.243	1.641	0.101	14.219	0	-0.0501	-0.055	-0.045	0.002	-20.62	0	0.443	0.306	0.58	0.07	6.349	0	0.2881	0.176	0.4	0.057	5.03	0	1.1246	1.018	1.231	0.054	20.674	0	-0.1537
Abnormal serum enzyme levels	digestive	0.5464	0.275	0.818	0.139	3.942	1.72702	1.31653	2.26596	122	6409	112	8241	8.06978e-05	0.00131707	mi_significant	0.237299	4.09314	1.4395	1.241	1.638	0.101	14.202	0	-0.0502	-0.055	-0.045	0.002	-20.664	0	0.4439	0.307	0.581	0.07	6.36	0	0.2833	0.171	0.396	0.057	4.943	0	1.1273	1.021	1.234	0.054	20.715	0	-0.1569
Abnormal spermatozoa	genitourinary	1.9313	1.509	2.354	0.216	8.959	6.89847	4.52221	10.5276	128	6403	28	8325	3.26406e-19	1.43836e-16	mi_significant	0.838753	18.4862	1.4108	1.212	1.61	0.102	13.879	0	-0.0497	-0.054	-0.045	0.002	-20.446	0	0.4524	0.315	0.589	0.07	6.47	0	0.2906	0.178	0.403	0.057	5.056	0	1.132	1.025	1.239	0.055	20.759	0	-0.1622
Abnormal sputum	respiratory	-0.134	-1.944	1.676	0.923	-0.145	0.87459	0.14313	5.34414	10	6521	10	8343	0.884604	0.940826	not_significant	-0.0581955	0.053251	1.4326	1.234	1.631	0.101	14.138	0	-0.0498	-0.055	-0.045	0.002	-20.539	0	0.4428	0.306	0.58	0.07	6.348	0	0.2902	0.178	0.402	0.057	5.067	0	1.1258	1.019	1.232	0.054	20.699	0	-0.1534
Abnormal tumor markers	symptoms	0.7594	-1.124	2.643	0.961	0.79	2.13699	0.324977	14.0553	10	6521	10	8343	0.429382	0.634423	not_significant	0.329803	0.367157	1.4322	1.234	1.631	0.101	14.138	0	-0.0498	-0.055	-0.045	0.002	-20.548	0	0.4419	0.305	0.579	0.07	6.333	0	0.2905	0.178	0.403	0.057	5.072	0	1.1261	1.02	1.233	0.054	20.703	0	-0.1534
Abnormal weight gain	endocrine/metabolic	0.6548	0.326	0.984	0.168	3.9	1.92476	1.38542	2.67514	84	6447	73	8280	9.61303e-05	0.00151291	mi_significant	0.284376	4.01714	1.4344	1.236	1.633	0.101	14.151	0	-0.0501	-0.055	-0.045	0.002	-20.632	0	0.4483	0.312	0.585	0.07	6.423	0	0.2922	0.18	0.404	0.057	5.099	0	1.1305	1.024	1.237	0.054	20.768	0	-0.155
Abnormality of gait	neurological	0.5527	0.122	0.983	0.22	2.517	1.73794	1.12975	2.67246	47	6484	48	8305	0.0118196	0.05369	not_significant	0.240035	1.9274	1.4444	1.246	1.643	0.101	14.244	0	-0.0502	-0.055	-0.045	0.002	-20.663	0	0.4403	0.304	0.577	0.07	6.309	0	0.2869	0.175	0.399	0.057	5.008	0	1.127	1.02	1.234	0.054	20.716	0	-0.1527
Abnormality of red blood cells	hematopoietic	0.7287	0.055	1.402	0.344	2.121	2.07238	1.05654	4.06332	21	6510	17	8336	0.0339064	0.113193	not_significant	0.31647	1.46972	1.4329	1.234	1.631	0.101	14.144	0	-0.0499	-0.055	-0.045	0.002	-20.572	0	0.4428	0.306	0.58	0.07	6.346	0	0.2907	0.178	0.403	0.057	5.076	0	1.1273	1.021	1.234	0.054	20.723	0	-0.1535
Acid-base balance disorder	endocrine/metabolic	1.4945	0.12	2.87	0.702	2.13	4.45711	1.1275	17.637	10	6521	10	8343	0.0331408	0.112051	not_significant	0.649053	1.47964	1.4298	1.231	1.628	0.101	14.109	0	-0.0498	-0.055	-0.045	0.002	-20.542	0	0.4453	0.309	0.582	0.07	6.382	0	0.2923	0.18	0.405	0.057	5.102	0	1.1274	1.021	1.234	0.054	20.719	0	-0.1518
Acidosis	endocrine/metabolic	1.6307	0.994	2.267	0.325	5.019	5.10745	2.70202	9.65041	41	6490	15	8338	5.19192e-07	2.68768e-05	mi_significant	0.708204	6.28467	1.4514	1.252	1.65	0.102	14.29	0	-0.0504	-0.055	-0.046	0.002	-20.736	0	0.4423	0.305	0.579	0.07	6.334	0	0.2886	0.176	0.401	0.057	5.035	0	1.1281	1.021	1.235	0.054	20.721	0	-0.1528
Acne	dermatologic	0.6204	0.253	0.987	0.187	3.313	1.85967	1.28788	2.68317	82	6449	53	8300	0.000922119	0.0083496	mi_significant	0.269436	3.03521	1.4254	1.227	1.624	0.101	14.066	0	-0.0497	-0.054	-0.045	0.002	-20.509	0	0.4431	0.306	0.58	0.07	6.351	0	0.2883	0.176	0.401	0.057	5.032	0	1.1232	1.017	1.23	0.054	20.64	0	-0.1557
Acquired absence of breast	neoplasms	-1.4726	-3.737	0.791	1.155	-1.275	0.229328	0.0238255	2.2056	10	6521	10	8343	0.202372	0.390563	not_significant	-0.639542	0.69385	1.4335	1.235	1.632	0.101	14.151	0	-0.0498	-0.055	-0.045	0.002	-20.557	0	0.4427	0.306	0.579	0.07	6.347	0	0.2907	0.178	0.403	0.057	5.077	0	1.1268	1.02	1.233	0.054	20.714	0	-0.153
Acquired absence of limb		2.1184	0.528	3.709	0.811	2.611	8.31782	1.69554	40.813	10	6521	10	8343	0.00902861	0.0440436	mi_significant	0.920009	2.04438	1.4387	1.24	1.637	0.101	14.191	0	-0.05	-0.055	-0.045	0.002	-20.615	0	0.4452	0.308	0.582	0.07	6.38	0	0.2903	0.178	0.403	0.057	5.067	0	1.1277	1.021	1.234	0.054	20.723	0	-0.1516
Acquired absence of organs		0.6858	0.421	0.951	0.135	5.075	1.98536	1.52348	2.5883	135	6396	114	8239	3.88232e-07	2.18427e-05	mi_significant	0.297839	6.41091	1.4508	1.252	1.65	0.101	14.3	0	-0.0505	-0.055	-0.046	0.002	-20.764	0	0.4406	0.304	0.577	0.07	6.31	0	0.2816	0.169	0.394	0.057	4.911	0	1.1265	1.02	1.233	0.054	20.695	0	-0.1605
Acquired acanthosis nigricans	dermatologic	1.8695	0.326	3.413	0.788	2.374	6.48505	1.38542	30.3562	10	6521	10	8343	0.0176141	0.0723707	not_significant	0.811914	1.75414	1.4289	1.23	1.628	0.101	14.101	0	-0.0498	-0.055	-0.045	0.002	-20.518	0	0.4426	0.306	0.579	0.07	6.344	0	0.2903	0.178	0.403	0.057	5.068	0	1.1265	1.02	1.233	0.054	20.708	0	-0.1542
Acquired deformities of finger	musculoskeletal	0.0174	-0.62	0.655	0.325	0.054	1.01755	0.537944	1.92514	17	6514	27	8326	0.957208	0.982476	not_significant	0.00755672	0.0189936	1.433	1.234	1.632	0.101	14.146	0	-0.0498	-0.055	-0.045	0.002	-20.552	0	0.4428	0.306	0.579	0.07	6.347	0	0.2902	0.178	0.402	0.057	5.068	0	1.1259	1.019	1.232	0.054	20.699	0	-0.1534
Acquired deformities of forearm	musculoskeletal	1.1892	-0.678	3.057	0.953	1.248	3.28445	0.507631	21.2637	10	6521	10	8343	0.211977	0.399763	not_significant	0.516463	0.673711	1.433	1.234	1.632	0.101	14.146	0	-0.0499	-0.055	-0.045	0.002	-20.567	0	0.4441	0.307	0.581	0.07	6.365	0	0.2912	0.179	0.403	0.057	5.084	0	1.1272	1.021	1.234	0.054	20.719	0	-0.1522
Acquired deformities of hip	musculoskeletal	-0.1754	-2.614	2.263	1.244	-0.141	0.839121	0.073241	9.61188	10	6521	10	8343	0.887893	0.942428	not_significant	-0.0761753	0.0516396	1.4328	1.234	1.631	0.101	14.142	0	-0.0498	-0.055	-0.045	0.002	-20.548	0	0.4427	0.306	0.579	0.07	6.346	0	0.2903	0.178	0.403	0.057	5.069	0	1.1259	1.019	1.232	0.054	20.7	0	-0.1534
Acquired deformities of knee	musculoskeletal	-0.5649	-2.287	1.157	0.879	-0.643	0.568417	0.101571	3.18038	10	6521	10	8343	0.520266	0.704163	not_significant	-0.245333	0.283775	1.4331	1.235	1.632	0.101	14.147	0	-0.0498	-0.055	-0.045	0.002	-20.55	0	0.4424	0.306	0.579	0.07	6.341	0	0.2903	0.178	0.403	0.057	5.069	0	1.1256	1.019	1.232	0.054	20.695	0	-0.1535
Acquired foot deformities	musculoskeletal	0.6438	0.002	1.285	0.327	1.967	1.9037	1.002	3.61467	23	6508	19	8334	0.0491863	0.144896	not_significant	0.279599	1.30816	1.4354	1.237	1.634	0.101	14.167	0	-0.0499	-0.055	-0.045	0.002	-20.584	0	0.4417	0.305	0.578	0.07	6.331	0	0.29	0.178	0.402	0.057	5.063	0	1.1258	1.019	1.232	0.054	20.695	0	-0.1542
Acquired hypothyroidism	endocrine/metabolic	0.5409	0.091	0.99	0.229	2.359	1.71755	1.09527	2.69123	42	6489	41	8312	0.0183325	0.0745712	not_significant	0.23491	1.73678	1.433	1.234	1.632	0.101	14.144	0	-0.0499	-0.055	-0.045	0.002	-20.593	0	0.4453	0.309	0.582	0.07	6.382	0	0.2919	0.18	0.404	0.057	5.096	0	1.1291	1.022	1.236	0.054	20.748	0	-0.1526
Acquired spondylolisthesis	musculoskeletal	0.2317	-0.212	0.675	0.226	1.024	1.26074	0.808965	1.96403	36	6495	52	8301	0.305882	0.50801	not_significant	0.100626	0.514446	1.4362	1.238	1.635	0.101	14.173	0	-0.05	-0.055	-0.045	0.002	-20.579	0	0.4424	0.306	0.579	0.07	6.342	0	0.2897	0.177	0.402	0.057	5.059	0	1.1266	1.02	1.233	0.054	20.71	0	-0.1534
Acquired toe deformities	musculoskeletal	0.1745	-0.84	1.189	0.518	0.337	1.19065	0.431711	3.2838	10	6521	10	8343	0.736075	0.850056	not_significant	0.0757844	0.133078	1.433	1.234	1.632	0.101	14.146	0	-0.0498	-0.055	-0.045	0.002	-20.553	0	0.4428	0.306	0.58	0.07	6.347	0	0.2899	0.178	0.402	0.057	5.062	0	1.1258	1.019	1.232	0.054	20.699	0	-0.1536
Actinic keratosis	dermatologic	-0.5044	-0.794	-0.214	0.148	-3.409	0.603868	0.452033	0.807348	67	6464	195	8158	0.000650861	0.00642118	con_significant	-0.219058	3.18651	1.4111	1.212	1.61	0.101	13.903	0	-0.049	-0.054	-0.044	0.002	-20.135	0	0.4386	0.302	0.575	0.07	6.285	0	0.2891	0.177	0.401	0.057	5.045	0	1.1215	1.015	1.228	0.054	20.608	0	-0.1566
Acute and chronic tonsillitis	respiratory	0.4627	-2.324	3.249	1.422	0.326	1.58836	0.0978813	25.7646	10	6521	10	8343	0.744797	0.851352	not_significant	0.200948	0.127962	1.4327	1.234	1.631	0.101	14.142	0	-0.0498	-0.055	-0.045	0.002	-20.551	0	0.4429	0.306	0.58	0.07	6.349	0	0.2904	0.178	0.403	0.057	5.071	0	1.126	1.019	1.233	0.054	20.701	0	-0.1533
Acute and subacute necrosis of liver	digestive	1.7087	0.066	3.352	0.838	2.038	5.52178	1.06823	28.5598	10	6521	10	8343	0.0415145	0.130476	not_significant	0.742079	1.3818	1.4347	1.236	1.633	0.101	14.157	0	-0.0499	-0.055	-0.045	0.002	-20.562	0	0.4428	0.306	0.58	0.07	6.347	0	0.2874	0.175	0.4	0.057	5.016	0	1.1251	1.018	1.232	0.054	20.683	0	-0.1541
Acute appendicitis	digestive	0.4439	-0.378	1.266	0.419	1.058	1.55877	0.685231	3.54664	12	6519	12	8341	0.289947	0.491936	not_significant	0.192783	0.537682	1.4317	1.233	1.63	0.101	14.132	0	-0.0498	-0.055	-0.045	0.002	-20.55	0	0.4434	0.307	0.58	0.07	6.356	0	0.2905	0.178	0.403	0.057	5.073	0	1.1266	1.02	1.233	0.054	20.711	0	-0.1534
Acute bronchitis and bronchiolitis	respiratory	0.2348	-0.113	0.583	0.178	1.322	1.26466	0.893151	1.7914	59	6472	81	8272	0.186294	0.366489	not_significant	0.101972	0.729801	1.4318	1.233	1.63	0.101	14.133	0	-0.0499	-0.055	-0.045	0.002	-20.574	0	0.4454	0.309	0.582	0.07	6.381	0	0.2928	0.18	0.405	0.057	5.11	0	1.1292	1.022	1.236	0.054	20.735	0	-0.1522
Acute bronchospasm	respiratory	0.7459	-0.104	1.596	0.434	1.719	2.10834	0.901225	4.93326	13	6518	11	8342	0.085525	0.216184	not_significant	0.32394	1.06791	1.4343	1.236	1.633	0.101	14.157	0	-0.0499	-0.055	-0.045	0.002	-20.574	0	0.4439	0.307	0.581	0.07	6.362	0	0.2901	0.178	0.402	0.057	5.065	0	1.1263	1.02	1.233	0.054	20.705	0	-0.1541
Acute cystitis	genitourinary	0.8847	0.372	1.398	0.262	3.38	2.42226	1.45063	4.0471	39	6492	28	8325	0.000723682	0.00693266	mi_significant	0.38422	3.14045	1.4386	1.24	1.637	0.101	14.189	0	-0.0501	-0.055	-0.045	0.002	-20.643	0	0.4465	0.31	0.583	0.07	6.397	0	0.2909	0.179	0.403	0.057	5.077	0	1.1295	1.023	1.236	0.054	20.753	0	-0.1514
Acute dermatitis due to solar radiation	dermatologic	-0.1738	-1.019	0.671	0.431	-0.403	0.840465	0.360956	1.95619	10	6521	17	8336	0.686795	0.811388	not_significant	-0.0754804	0.163173	1.4327	1.234	1.631	0.101	14.143	0	-0.0498	-0.055	-0.045	0.002	-20.544	0	0.4425	0.306	0.579	0.07	6.343	0	0.29	0.178	0.402	0.057	5.065	0	1.1257	1.019	1.232	0.054	20.697	0	-0.1534
Acute gastritis	digestive	-0.279	-0.969	0.411	0.352	-0.793	0.75654	0.379462	1.50833	12	6519	27	8326	0.428013	0.633787	not_significant	-0.121168	0.368544	1.4343	1.236	1.633	0.101	14.157	0	-0.0498	-0.055	-0.045	0.002	-20.555	0	0.4421	0.305	0.579	0.07	6.336	0	0.2897	0.177	0.402	0.057	5.058	0	1.1248	1.018	1.231	0.054	20.673	0	-0.1533
Acute laryngitis and tracheitis	respiratory	0.7228	0.011	1.435	0.363	1.99	2.06019	1.01106	4.19965	17	6514	16	8337	0.0465971	0.140642	not_significant	0.313908	1.33164	1.436	1.237	1.635	0.101	14.173	0	-0.05	-0.055	-0.045	0.002	-20.594	0	0.444	0.307	0.581	0.07	6.364	0	0.2899	0.178	0.402	0.057	5.061	0	1.1272	1.021	1.234	0.054	20.718	0	-0.1537
Acute osteomyelitis	musculoskeletal	2.5376	0.389	4.686	1.096	2.315	12.6493	1.4755	108.419	10	6521	10	8343	0.0206276	0.0810578	not_significant	1.10207	1.68555	1.4332	1.235	1.632	0.101	14.144	0	-0.0499	-0.055	-0.045	0.002	-20.566	0	0.4444	0.308	0.581	0.07	6.369	0	0.2912	0.179	0.403	0.057	5.083	0	1.1276	1.021	1.234	0.054	20.725	0	-0.1537
Acute pain	neurological	0.2711	0.069	0.474	0.103	2.623	1.31141	1.07144	1.60641	197	6334	233	8120	0.00870985	0.0428046	mi_significant	0.117737	2.05999	1.4403	1.242	1.639	0.101	14.208	0	-0.0501	-0.055	-0.045	0.002	-20.64	0	0.4393	0.303	0.576	0.07	6.296	0	0.2848	0.172	0.397	0.057	4.97	0	1.124	1.017	1.231	0.054	20.66	0	-0.1604
Acute pancreatitis	digestive	1.3735	0.551	2.196	0.42	3.273	3.94915	1.73499	8.98899	18	6513	10	8343	0.00106348	0.00931071	mi_significant	0.596503	2.97327	1.437	1.238	1.636	0.101	14.175	0	-0.05	-0.055	-0.045	0.002	-20.607	0	0.4461	0.309	0.583	0.07	6.392	0	0.2914	0.179	0.404	0.057	5.086	0	1.1282	1.022	1.235	0.054	20.733	0	-0.1541
Acute pericarditis	circulatory system	1.0495	-0.163	2.262	0.619	1.697	2.85622	0.849591	9.60227	10	6521	10	8343	0.0897439	0.222366	not_significant	0.455792	1.04699	1.4335	1.235	1.632	0.101	14.147	0	-0.0499	-0.055	-0.045	0.002	-20.566	0	0.4436	0.307	0.58	0.07	6.358	0	0.2914	0.179	0.404	0.057	5.087	0	1.1268	1.02	1.233	0.054	20.712	0	-0.1526
Acute periodontitis	digestive	1.3755	0.141	2.61	0.63	2.184	3.95705	1.15142	13.5991	10	6521	10	8343	0.0289744	0.102144	not_significant	0.597372	1.53799	1.4353	1.237	1.634	0.101	14.161	0	-0.05	-0.055	-0.045	0.002	-20.59	0	0.4445	0.308	0.581	0.07	6.37	0	0.2923	0.18	0.405	0.057	5.101	0	1.1268	1.02	1.233	0.054	20.71	0	-0.1512
Acute pharyngitis	respiratory	0.175	0.003	0.347	0.088	1.991	1.19125	1.003	1.41482	261	6270	326	8027	0.0464396	0.140488	not_significant	0.0760015	1.33311	1.4209	1.222	1.62	0.101	14.002	0	-0.0498	-0.055	-0.045	0.002	-20.516	0	0.449	0.312	0.586	0.07	6.429	0	0.2917	0.179	0.404	0.057	5.093	0	1.1315	1.025	1.238	0.054	20.77	0	-0.154
Acute posthemorrhagic anemia	hematopoietic	0.8509	0.346	1.356	0.258	3.304	2.34175	1.4134	3.88064	44	6487	28	8325	0.00095201	0.0084019	mi_significant	0.369541	3.02136	1.4351	1.236	1.634	0.101	14.159	0	-0.05	-0.055	-0.045	0.002	-20.593	0	0.4433	0.307	0.58	0.07	6.352	0	0.2901	0.178	0.402	0.057	5.064	0	1.1256	1.019	1.232	0.054	20.689	0	-0.1549
Acute prostatitis	genitourinary	0.4837	-0.203	1.17	0.35	1.38	1.62206	0.816278	3.22199	16	6515	19	8334	0.167507	0.342264	not_significant	0.210068	0.775966	1.4337	1.235	1.632	0.101	14.152	0	-0.0499	-0.055	-0.045	0.002	-20.571	0	0.4442	0.307	0.581	0.07	6.367	0	0.29	0.178	0.402	0.057	5.064	0	1.1272	1.021	1.234	0.054	20.72	0	-0.1536
Acute reaction to stress	mental disorders	0.1157	-0.501	0.733	0.315	0.368	1.12266	0.605924	2.08132	18	6513	26	8327	0.713238	0.835107	not_significant	0.0502479	0.146766	1.4328	1.234	1.631	0.101	14.143	0	-0.0498	-0.055	-0.045	0.002	-20.555	0	0.4428	0.306	0.58	0.07	6.348	0	0.2906	0.178	0.403	0.057	5.073	0	1.1264	1.02	1.233	0.054	20.701	0	-0.1531
Acute renal failure	genitourinary	1.003	0.629	1.377	0.191	5.255	2.72645	1.87573	3.96299	80	6451	54	8299	1.48232e-07	1.03139e-05	mi_significant	0.435597	6.82906	1.4563	1.257	1.655	0.102	14.346	0	-0.0507	-0.055	-0.046	0.002	-20.843	0	0.4466	0.31	0.583	0.07	6.394	0	0.2921	0.18	0.405	0.057	5.095	0	1.1308	1.024	1.238	0.054	20.764	0	-0.1499
Acute sinusitis	respiratory	0.099	-0.108	0.306	0.106	0.936	1.10407	0.897628	1.35798	162	6369	246	8107	0.349353	0.551423	not_significant	0.0429952	0.456736	1.4299	1.231	1.629	0.101	14.108	0	-0.0499	-0.055	-0.045	0.002	-20.562	0	0.4456	0.309	0.582	0.07	6.381	0	0.2925	0.18	0.405	0.057	5.103	0	1.1295	1.023	1.236	0.055	20.711	0	-0.1529
Acute tonsillitis	respiratory	-0.0784	-0.903	0.746	0.421	-0.186	0.924595	0.405352	2.10855	10	6521	14	8339	0.852122	0.919948	not_significant	-0.0340487	0.0694984	1.4335	1.235	1.632	0.101	14.145	0	-0.0498	-0.055	-0.045	0.002	-20.553	0	0.4425	0.306	0.579	0.07	6.341	0	0.2902	0.178	0.402	0.057	5.067	0	1.1256	1.019	1.232	0.054	20.691	0	-0.1535
Acute upper respiratory infections of multiple or unspecified sites	respiratory	0.2164	0.063	0.37	0.078	2.766	1.2416	1.06503	1.44773	330	6201	426	7927	0.00567232	0.0319098	mi_significant	0.0939813	2.24624	1.4201	1.221	1.619	0.101	14.002	0	-0.0499	-0.055	-0.045	0.002	-20.571	0	0.453	0.316	0.59	0.07	6.484	0	0.2946	0.182	0.407	0.057	5.141	0	1.1369	1.03	1.244	0.055	20.836	0	-0.1534
Acute vascular insufficiency of intestine	circulatory system	-0.7291	-3.222	1.764	1.272	-0.573	0.482343	0.0398752	5.83573	10	6521	10	8343	0.566455	0.733598	not_significant	-0.316644	0.246834	1.4324	1.234	1.631	0.101	14.139	0	-0.0498	-0.055	-0.045	0.002	-20.545	0	0.4427	0.306	0.579	0.07	6.346	0	0.2904	0.178	0.403	0.057	5.071	0	1.1263	1.02	1.233	0.054	20.705	0	-0.1534
Acute, but ill-defined cerebrovascular disease	circulatory system	0.4671	-2.319	3.253	1.421	0.329	1.59536	0.0983719	25.8678	10	6521	10	8343	0.742405	0.851352	not_significant	0.202859	0.129359	1.433	1.234	1.632	0.101	14.146	0	-0.0498	-0.055	-0.045	0.002	-20.552	0	0.4427	0.306	0.579	0.07	6.346	0	0.29	0.178	0.402	0.057	5.064	0	1.1258	1.019	1.232	0.054	20.699	0	-0.1535
Adjustment reaction	mental disorders	0.3764	0.124	0.629	0.129	2.923	1.45703	1.13202	1.87573	134	6397	135	8218	0.00347003	0.022124	mi_significant	0.163468	2.45967	1.4289	1.23	1.627	0.101	14.102	0	-0.0499	-0.055	-0.045	0.002	-20.567	0	0.446	0.309	0.583	0.07	6.392	0	0.2867	0.174	0.399	0.057	5.004	0	1.1273	1.021	1.234	0.054	20.72	0	-0.1563
Adult failure to thrive	endocrine/metabolic	0.8524	-0.514	2.219	0.697	1.222	2.34527	0.598098	9.19813	10	6521	10	8343	0.221576	0.409544	not_significant	0.370193	0.654476	1.4364	1.238	1.635	0.101	14.173	0	-0.0499	-0.055	-0.045	0.002	-20.58	0	0.4431	0.306	0.58	0.07	6.351	0	0.2896	0.177	0.402	0.057	5.057	0	1.1255	1.019	1.232	0.054	20.692	0	-0.1534
Adverse drug events and drug allergies	injuries & poisonings	0.7819	0.491	1.073	0.149	5.26	2.18562	1.63395	2.92414	115	6416	94	8259	1.43932e-07	1.03139e-05	mi_significant	0.339575	6.84184	1.4635	1.264	1.663	0.102	14.404	0	-0.0507	-0.056	-0.046	0.002	-20.841	0	0.4396	0.303	0.576	0.07	6.298	0	0.2827	0.17	0.395	0.057	4.93	0	1.1237	1.017	1.23	0.054	20.645	0	-0.1627
Adverse effects of antibacterials (not penicillins)	injuries & poisonings	0.485	0.083	0.888	0.205	2.362	1.62418	1.08654	2.43026	54	6477	53	8300	0.0181895	0.0742176	not_significant	0.210633	1.74018	1.4371	1.239	1.636	0.101	14.183	0	-0.05	-0.055	-0.045	0.002	-20.6	0	0.4396	0.303	0.576	0.07	6.3	0	0.2884	0.176	0.401	0.057	5.035	0	1.1248	1.018	1.231	0.054	20.675	0	-0.1574
Adverse effects of sedatives or other central nervous system depressants and anesthetics	injuries & poisonings	0.4916	-0.035	1.018	0.268	1.831	1.63493	0.965605	2.76765	31	6500	33	8320	0.0671143	0.179605	not_significant	0.213499	1.17318	1.4413	1.242	1.64	0.101	14.21	0	-0.0501	-0.055	-0.045	0.002	-20.612	0	0.4403	0.304	0.577	0.07	6.311	0	0.2889	0.177	0.401	0.057	5.044	0	1.1244	1.018	1.231	0.054	20.669	0	-0.1554
Adverse reaction to serum or vaccine	injuries & poisonings	-0.1031	-1.223	1.016	0.571	-0.18	0.902037	0.294346	2.76212	10	6521	10	8343	0.856779	0.921444	not_significant	-0.0447758	0.0671311	1.433	1.234	1.632	0.101	14.146	0	-0.0498	-0.055	-0.045	0.002	-20.551	0	0.4427	0.306	0.579	0.07	6.346	0	0.2901	0.178	0.402	0.057	5.066	0	1.1257	1.019	1.232	0.054	20.697	0	-0.1533
Agorophobia, social phobia, and panic disorder	mental disorders	0.2843	-0.101	0.67	0.197	1.444	1.32883	0.903933	1.95424	54	6477	57	8296	0.148604	0.317652	not_significant	0.12347	0.82797	1.4289	1.23	1.628	0.101	14.098	0	-0.0498	-0.055	-0.045	0.002	-20.536	0	0.4443	0.308	0.581	0.07	6.368	0	0.2911	0.179	0.403	0.057	5.082	0	1.1274	1.021	1.234	0.054	20.721	0	-0.1532
Alcohol-related disorders	mental disorders	0.3075	-0.19	0.805	0.254	1.211	1.36002	0.826959	2.2367	31	6500	37	8316	0.226079	0.413957	not_significant	0.133546	0.645739	1.4337	1.235	1.632	0.101	14.15	0	-0.0499	-0.055	-0.045	0.002	-20.572	0	0.444	0.307	0.581	0.07	6.363	0	0.2911	0.179	0.403	0.057	5.082	0	1.1271	1.02	1.234	0.054	20.716	0	-0.1528
Alcoholic liver damage	mental disorders	0.4086	-0.673	1.49	0.552	0.741	1.50471	0.510176	4.4371	10	6521	10	8343	0.458956	0.659441	not_significant	0.177453	0.338229	1.4336	1.235	1.632	0.101	14.151	0	-0.0498	-0.055	-0.045	0.002	-20.558	0	0.4425	0.306	0.579	0.07	6.343	0	0.2892	0.177	0.401	0.057	5.049	0	1.1256	1.019	1.232	0.054	20.695	0	-0.1538
Alcoholism	mental disorders	0.4659	0.045	0.887	0.215	2.168	1.59345	1.04603	2.42784	48	6483	45	8308	0.0301487	0.10381	not_significant	0.202338	1.52073	1.4306	1.232	1.629	0.101	14.118	0	-0.0499	-0.055	-0.045	0.002	-20.571	0	0.4467	0.31	0.584	0.07	6.4	0	0.2912	0.179	0.404	0.057	5.084	0	1.1289	1.022	1.236	0.054	20.744	0	-0.1511
Alkalosis	endocrine/metabolic	1.2318	-0.049	2.513	0.654	1.885	3.42739	0.952181	12.3419	10	6521	10	8343	0.0594944	0.164422	not_significant	0.534964	1.22552	1.4348	1.236	1.633	0.101	14.163	0	-0.05	-0.055	-0.045	0.002	-20.594	0	0.4456	0.309	0.582	0.07	6.385	0	0.2922	0.18	0.405	0.057	5.101	0	1.1281	1.021	1.235	0.054	20.731	0	-0.1507
Allergic conjunctivitis	sense organs	0.3458	-0.119	0.81	0.237	1.458	1.41312	0.887808	2.24791	35	6496	41	8312	0.144774	0.31171	not_significant	0.150179	0.839309	1.4328	1.234	1.631	0.101	14.143	0	-0.0499	-0.055	-0.045	0.002	-20.569	0	0.4438	0.307	0.581	0.07	6.361	0	0.2905	0.178	0.403	0.057	5.073	0	1.1272	1.021	1.234	0.054	20.72	0	-0.1538
Allergic reaction to food	injuries & poisonings	0.4545	0.054	0.855	0.204	2.225	1.57539	1.05548	2.35137	52	6479	53	8300	0.0260924	0.096084	not_significant	0.197387	1.58349	1.4351	1.237	1.634	0.101	14.163	0	-0.05	-0.055	-0.045	0.002	-20.59	0	0.4437	0.307	0.58	0.07	6.359	0	0.2892	0.177	0.401	0.057	5.049	0	1.1265	1.02	1.233	0.054	20.707	0	-0.1555
Allergic rhinitis	respiratory	0.2851	0.11	0.461	0.09	3.182	1.3299	1.11628	1.58566	266	6265	300	8053	0.00146322	0.0117235	mi_significant	0.123817	2.83469	1.4238	1.225	1.623	0.101	14.044	0	-0.05	-0.055	-0.045	0.002	-20.597	0	0.4489	0.312	0.586	0.07	6.43	0	0.2977	0.185	0.41	0.057	5.192	0	1.1335	1.027	1.24	0.054	20.808	0	-0.1518
Allergies, other	injuries & poisonings	0.3697	0.102	0.637	0.137	2.707	1.4473	1.10738	1.8908	114	6417	123	8230	0.00679244	0.0360627	mi_significant	0.160559	2.16797	1.4387	1.24	1.637	0.101	14.191	0	-0.0501	-0.055	-0.045	0.002	-20.622	0	0.4439	0.307	0.581	0.07	6.363	0	0.287	0.175	0.399	0.057	5.009	0	1.1249	1.018	1.232	0.054	20.679	0	-0.1582
Allergy/adverse effect of penicillin	injuries & poisonings	-0.1637	-0.507	0.179	0.175	-0.935	0.848997	0.6023	1.19602	56	6475	99	8254	0.34954	0.551423	not_significant	-0.071094	0.456503	1.4312	1.233	1.63	0.101	14.127	0	-0.0498	-0.055	-0.045	0.002	-20.525	0	0.4438	0.307	0.581	0.07	6.361	0	0.2921	0.18	0.404	0.057	5.098	0	1.1265	1.02	1.233	0.054	20.709	0	-0.1518
Alopecia	dermatologic	0.166	-0.107	0.439	0.139	1.192	1.18057	0.898526	1.55116	103	6428	125	8228	0.233423	0.419928	not_significant	0.0720929	0.631856	1.4301	1.231	1.629	0.101	14.113	0	-0.0498	-0.055	-0.045	0.002	-20.548	0	0.4442	0.307	0.581	0.07	6.367	0	0.2902	0.178	0.402	0.057	5.068	0	1.1266	1.02	1.233	0.054	20.71	0	-0.1545
Alopecia Areata	dermatologic	0.2376	-0.556	1.031	0.405	0.587	1.2682	0.573498	2.80387	14	6517	13	8340	0.557469	0.726799	not_significant	0.103188	0.253779	1.4315	1.233	1.63	0.101	14.127	0	-0.0498	-0.055	-0.045	0.002	-20.542	0	0.4431	0.306	0.58	0.07	6.352	0	0.2906	0.178	0.403	0.057	5.075	0	1.126	1.019	1.233	0.054	20.701	0	-0.1533
Alteration of consciousness	mental disorders	0.0956	-0.31	0.501	0.207	0.462	1.10032	0.733447	1.65037	44	6487	59	8294	0.644144	0.783402	not_significant	0.0415186	0.191017	1.4328	1.234	1.631	0.101	14.144	0	-0.0498	-0.055	-0.045	0.002	-20.554	0	0.4423	0.306	0.579	0.07	6.34	0	0.29	0.178	0.402	0.057	5.064	0	1.126	1.019	1.233	0.054	20.701	0	-0.1538
Altered mental status	mental disorders	0.8138	0.164	1.463	0.331	2.456	2.25647	1.17821	4.3189	26	6505	19	8334	0.0140521	0.0609076	not_significant	0.353429	1.85226	1.4332	1.235	1.632	0.101	14.149	0	-0.05	-0.055	-0.045	0.002	-20.604	0	0.4455	0.309	0.582	0.07	6.384	0	0.2934	0.181	0.406	0.057	5.12	0	1.1288	1.022	1.235	0.054	20.741	0	-0.1505
Althete's foot	infectious diseases	0.1806	-0.147	0.508	0.167	1.081	1.19794	0.863294	1.66196	72	6459	87	8266	0.279488	0.477369	not_significant	0.0784336	0.553637	1.4334	1.235	1.632	0.101	14.148	0	-0.0499	-0.055	-0.045	0.002	-20.572	0	0.4438	0.307	0.581	0.07	6.36	0	0.2912	0.179	0.403	0.057	5.084	0	1.1264	1.02	1.233	0.054	20.708	0	-0.1529
Amblyopia	sense organs	0.024	-1.143	1.191	0.595	0.04	1.02429	0.318861	3.29037	10	6521	10	8343	0.967847	0.986971	not_significant	0.0104231	0.0141934	1.4331	1.234	1.632	0.101	14.144	0	-0.0498	-0.055	-0.045	0.002	-20.548	0	0.4427	0.306	0.579	0.07	6.345	0	0.2902	0.178	0.402	0.057	5.067	0	1.1258	1.019	1.232	0.054	20.699	0	-0.1534
Amyloidosis	endocrine/metabolic	1.1622	-0.89	3.214	1.047	1.11	3.19696	0.410656	24.8784	10	6521	10	8343	0.266904	0.461238	not_significant	0.504737	0.573645	1.4345	1.236	1.633	0.101	14.161	0	-0.0499	-0.055	-0.045	0.002	-20.572	0	0.4432	0.306	0.58	0.07	6.353	0	0.2907	0.178	0.403	0.057	5.076	0	1.1258	1.019	1.232	0.054	20.697	0	-0.1532
Amyotrophic Lateral Sclerosis	neurological	-0.509	-2.793	1.775	1.165	-0.437	0.601096	0.0612372	5.90028	10	6521	10	8343	0.662229	0.794435	not_significant	-0.221056	0.178991	1.4333	1.235	1.632	0.101	14.149	0	-0.0498	-0.055	-0.045	0.002	-20.553	0	0.4424	0.306	0.579	0.07	6.341	0	0.2899	0.178	0.402	0.057	5.061	0	1.1255	1.019	1.232	0.054	20.691	0	-0.1535
Anal and rectal conditions	digestive	0.1945	-0.1	0.489	0.15	1.292	1.2147	0.904837	1.63068	87	6444	114	8239	0.196203	0.382218	not_significant	0.0844703	0.707294	1.4338	1.235	1.632	0.101	14.154	0	-0.0499	-0.055	-0.045	0.002	-20.583	0	0.4448	0.308	0.582	0.07	6.374	0	0.291	0.179	0.403	0.057	5.08	0	1.1273	1.021	1.234	0.054	20.719	0	-0.1533
Anal and rectal polyp	digestive	0.0371	-0.355	0.429	0.2	0.186	1.0378	0.701173	1.53572	41	6490	79	8274	0.852768	0.919948	not_significant	0.0161123	0.0691689	1.4339	1.235	1.633	0.101	14.138	0	-0.0499	-0.055	-0.045	0.002	-20.523	0	0.4428	0.306	0.58	0.07	6.347	0	0.2902	0.178	0.402	0.057	5.068	0	1.1259	1.019	1.233	0.054	20.7	0	-0.1536
Anaphylactic shock NOS	injuries & poisonings	0.2453	-0.558	1.049	0.41	0.598	1.278	0.572353	2.85479	13	6518	13	8340	0.549641	0.722589	not_significant	0.106532	0.259921	1.4321	1.234	1.631	0.101	14.136	0	-0.0498	-0.055	-0.045	0.002	-20.547	0	0.4429	0.306	0.58	0.07	6.349	0	0.2903	0.178	0.403	0.057	5.069	0	1.1258	1.019	1.232	0.054	20.698	0	-0.1536
Anemia in chronic kidney disease	hematopoietic	1.6721	0.847	2.497	0.421	3.973	5.32334	2.33264	12.146	26	6505	10	8343	7.10831e-05	0.00125296	mi_significant	0.726184	4.14823	1.4477	1.249	1.646	0.101	14.272	0	-0.0502	-0.055	-0.045	0.002	-20.688	0	0.442	0.305	0.579	0.07	6.332	0	0.2849	0.173	0.397	0.057	4.972	0	1.1245	1.018	1.231	0.054	20.666	0	-0.1547
Anemia in neoplastic disease	hematopoietic	1.3355	0.534	2.137	0.409	3.266	3.8019	1.70574	8.47398	22	6509	10	8343	0.00108958	0.0094145	mi_significant	0.58	2.96274	1.4452	1.246	1.644	0.101	14.246	0	-0.0502	-0.055	-0.045	0.002	-20.66	0	0.4415	0.305	0.578	0.07	6.327	0	0.2888	0.177	0.401	0.057	5.041	0	1.1246	1.018	1.231	0.054	20.669	0	-0.1539
Anemia of chronic disease	hematopoietic	2.0277	1.062	2.994	0.493	4.115	7.59659	2.89215	19.9654	24	6507	10	8343	3.87524e-05	0.000753392	mi_significant	0.880619	4.4117	1.4451	1.246	1.644	0.101	14.245	0	-0.0502	-0.055	-0.045	0.002	-20.674	0	0.4407	0.304	0.578	0.07	6.313	0	0.2919	0.18	0.404	0.057	5.095	0	1.1258	1.019	1.232	0.054	20.687	0	-0.1541
Aneurysm and dissection of heart	circulatory system	2.4149	0.052	4.778	1.206	2.003	11.1887	1.05338	118.866	10	6521	10	8343	0.0452057	0.138067	not_significant	1.04878	1.34481	1.4398	1.241	1.639	0.101	14.203	0	-0.05	-0.055	-0.045	0.002	-20.607	0	0.4412	0.304	0.578	0.07	6.323	0	0.2895	0.177	0.402	0.057	5.055	0	1.1262	1.02	1.233	0.054	20.703	0	-0.154
Aneurysm of iliac artery	circulatory system	0.8022	-1.613	3.218	1.232	0.651	2.23044	0.199289	24.9781	10	6521	10	8343	0.515062	0.701669	not_significant	0.348391	0.288141	1.4358	1.237	1.635	0.101	14.159	0	-0.0499	-0.055	-0.045	0.002	-20.555	0	0.4425	0.306	0.579	0.07	6.344	0	0.2905	0.178	0.403	0.057	5.072	0	1.126	1.019	1.233	0.054	20.702	0	-0.153
Aneurysm of other specified artery	circulatory system	0.5702	-0.689	1.83	0.643	0.887	1.76862	0.502078	6.23389	10	6521	10	8343	0.374887	0.581691	not_significant	0.247635	0.4261	1.4333	1.235	1.632	0.101	14.15	0	-0.0499	-0.055	-0.045	0.002	-20.565	0	0.4436	0.307	0.58	0.07	6.358	0	0.2908	0.179	0.403	0.057	5.078	0	1.1266	1.02	1.233	0.054	20.709	0	-0.153
Angina pectoris	circulatory system	0.9437	0.392	1.495	0.281	3.353	2.56947	1.47994	4.45934	30	6501	26	8327	0.000799883	0.00749961	mi_significant	0.409844	3.09697	1.4502	1.251	1.649	0.101	14.289	0	-0.0504	-0.055	-0.046	0.002	-20.713	0	0.4454	0.309	0.582	0.07	6.381	0	0.292	0.18	0.404	0.057	5.097	0	1.1274	1.021	1.234	0.054	20.719	0	-0.1543
Angiodysplasia of intestine (without mention of hemorrhage)	digestive	0.4887	-0.879	1.856	0.698	0.7	1.6302	0.415198	6.39809	10	6521	10	8343	0.483618	0.678025	not_significant	0.21224	0.315498	1.4353	1.237	1.634	0.101	14.161	0	-0.0499	-0.055	-0.045	0.002	-20.563	0	0.4422	0.305	0.579	0.07	6.338	0	0.29	0.178	0.402	0.057	5.065	0	1.1258	1.019	1.232	0.054	20.699	0	-0.1532
Anisometropia	sense organs	0.6018	-0.622	1.825	0.624	0.964	1.8254	0.53687	6.2028	10	6521	10	8343	0.334946	0.541318	not_significant	0.261358	0.475025	1.4335	1.235	1.632	0.101	14.149	0	-0.0499	-0.055	-0.045	0.002	-20.563	0	0.4437	0.307	0.58	0.07	6.359	0	0.2907	0.178	0.403	0.057	5.075	0	1.1263	1.02	1.233	0.054	20.706	0	-0.1527
Ankylosing spondylitis	musculoskeletal	0.6172	-0.82	2.054	0.733	0.842	1.85373	0.440432	7.79903	10	6521	10	8343	0.400027	0.60716	not_significant	0.268047	0.39791	1.4318	1.233	1.63	0.101	14.133	0	-0.0498	-0.055	-0.045	0.002	-20.538	0	0.4418	0.305	0.579	0.07	6.332	0	0.2899	0.178	0.402	0.057	5.063	0	1.1253	1.019	1.232	0.054	20.689	0	-0.1539
Ankylosis of joint	musculoskeletal	2.1575	-0.102	4.417	1.153	1.871	8.64949	0.90303	82.8474	10	6521	10	8343	0.0612943	0.167766	not_significant	0.93699	1.21258	1.4339	1.235	1.633	0.101	14.153	0	-0.0499	-0.055	-0.045	0.002	-20.558	0	0.4427	0.306	0.579	0.07	6.347	0	0.2894	0.177	0.402	0.057	5.054	0	1.1259	1.019	1.232	0.054	20.7	0	-0.155
Anomalies of endocrine glands, congenital	congenital anomalies	1.2745	-1.156	3.705	1.24	1.028	3.57691	0.314743	40.65	10	6521	10	8343	0.304075	0.507559	not_significant	0.553508	0.51702	1.4324	1.234	1.631	0.101	14.14	0	-0.0498	-0.055	-0.045	0.002	-20.546	0	0.4427	0.306	0.579	0.07	6.346	0	0.2902	0.178	0.402	0.057	5.067	0	1.1258	1.019	1.232	0.054	20.699	0	-0.1543
Anomalies of jaw size/symmetry	digestive	1.126	-0.344	2.596	0.75	1.502	3.0833	0.708929	13.41	10	6521	10	8343	0.133222	0.292072	not_significant	0.489016	0.875424	1.4338	1.235	1.632	0.101	14.151	0	-0.0499	-0.055	-0.045	0.002	-20.561	0	0.4423	0.306	0.579	0.07	6.34	0	0.2906	0.178	0.403	0.057	5.075	0	1.1261	1.019	1.233	0.054	20.702	0	-0.1542
Anomalies of pupillary function	sense organs	0.0446	-1.205	1.294	0.638	0.07	1.04561	0.299692	3.64735	10	6521	10	8343	0.94428	0.976992	not_significant	0.0193695	0.0248992	1.433	1.234	1.632	0.101	14.146	0	-0.0498	-0.055	-0.045	0.002	-20.552	0	0.4427	0.306	0.579	0.07	6.346	0	0.2902	0.178	0.402	0.057	5.067	0	1.1259	1.019	1.232	0.054	20.699	0	-0.1534
Anomalies of respiratory system, congenital	congenital anomalies	0.2155	-1.841	2.272	1.049	0.205	1.24048	0.158659	9.69878	10	6521	10	8343	0.837236	0.913223	not_significant	0.0935905	0.0771521	1.4327	1.234	1.631	0.101	14.143	0	-0.0498	-0.055	-0.045	0.002	-20.552	0	0.4429	0.306	0.58	0.07	6.348	0	0.2904	0.178	0.403	0.057	5.07	0	1.1259	1.019	1.233	0.054	20.7	0	-0.1533
Anorexia	endocrine/metabolic	0.919	0.207	1.631	0.363	2.529	2.50678	1.22998	5.10898	24	6507	15	8338	0.0114381	0.0526871	not_significant	0.399117	1.94165	1.4362	1.238	1.635	0.101	14.179	0	-0.05	-0.055	-0.045	0.002	-20.612	0	0.4445	0.308	0.581	0.07	6.371	0	0.2905	0.178	0.403	0.057	5.072	0	1.1257	1.019	1.232	0.054	20.69	0	-0.153
Anterior pituitary disorders		1.5616	0.689	2.434	0.445	3.508	4.76644	1.99172	11.4044	19	6512	10	8343	0.000451257	0.00488985	mi_significant	0.678194	3.34558	1.4362	1.238	1.635	0.101	14.176	0	-0.0499	-0.055	-0.045	0.002	-20.596	0	0.4418	0.305	0.579	0.07	6.331	0	0.2903	0.178	0.403	0.057	5.068	0	1.1261	1.019	1.233	0.054	20.699	0	-0.1581
Anticoagulants causing adverse effects	injuries & poisonings	1.6901	-0.294	3.674	1.012	1.669	5.42002	0.745276	39.4092	10	6521	10	8343	0.0950249	0.229239	not_significant	0.734001	1.02216	1.4394	1.241	1.638	0.101	14.195	0	-0.05	-0.055	-0.045	0.002	-20.6	0	0.4435	0.307	0.58	0.07	6.356	0	0.2903	0.178	0.403	0.057	5.069	0	1.1267	1.02	1.233	0.054	20.713	0	-0.1532
Antihypertensive agents causing adverse effects	injuries & poisonings	0.5868	-1.286	2.459	0.955	0.614	1.79822	0.276374	11.6931	10	6521	10	8343	0.53905	0.718371	not_significant	0.254844	0.268371	1.4337	1.235	1.632	0.101	14.152	0	-0.0499	-0.055	-0.045	0.002	-20.56	0	0.4432	0.306	0.58	0.07	6.353	0	0.2904	0.178	0.403	0.057	5.071	0	1.1263	1.02	1.233	0.054	20.705	0	-0.1531
Antineoplastic and immunosuppressive drugs causing adverse effects	injuries & poisonings	0.3217	-0.235	0.878	0.284	1.133	1.37947	0.790571	2.40608	29	6502	29	8324	0.257283	0.448451	not_significant	0.139713	0.589588	1.4347	1.236	1.633	0.101	14.163	0	-0.0499	-0.055	-0.045	0.002	-20.577	0	0.4428	0.306	0.58	0.07	6.347	0	0.2902	0.178	0.402	0.057	5.067	0	1.1254	1.019	1.232	0.054	20.69	0	-0.1531
Anxiety disorder	mental disorders	0.1174	-0.043	0.278	0.082	1.436	1.12457	0.957911	1.32049	302	6229	391	7962	0.150941	0.319782	not_significant	0.0509862	0.821192	1.4269	1.228	1.626	0.101	14.073	0	-0.0499	-0.055	-0.045	0.002	-20.558	0	0.4471	0.31	0.584	0.07	6.402	0	0.2912	0.179	0.403	0.057	5.085	0	1.129	1.022	1.236	0.054	20.738	0	-0.1534
Anxiety disorders	mental disorders	0.3015	-0.58	1.183	0.45	0.67	1.35189	0.559898	3.26415	10	6521	12	8341	0.502701	0.695158	not_significant	0.13094	0.29869	1.4333	1.235	1.632	0.101	14.149	0	-0.0499	-0.055	-0.045	0.002	-20.561	0	0.4435	0.307	0.58	0.07	6.356	0	0.291	0.179	0.403	0.057	5.08	0	1.1264	1.02	1.233	0.054	20.707	0	-0.1527
Aortic aneurysm	circulatory system	1.5207	0.695	2.347	0.421	3.609	4.57543	2.00371	10.4542	18	6513	10	8343	0.00030792	0.00363456	mi_significant	0.660432	3.51156	1.4515	1.253	1.65	0.101	14.305	0	-0.0503	-0.055	-0.046	0.002	-20.714	0	0.4376	0.301	0.574	0.07	6.269	0	0.2883	0.176	0.401	0.057	5.032	0	1.1261	1.019	1.233	0.054	20.698	0	-0.156
Aortic ectasia	circulatory system	1.0543	0.339	1.77	0.365	2.887	2.86997	1.40354	5.87085	20	6511	15	8338	0.00388665	0.0238984	mi_significant	0.457877	2.41042	1.4403	1.242	1.639	0.101	14.209	0	-0.0501	-0.055	-0.045	0.002	-20.64	0	0.443	0.306	0.58	0.07	6.349	0	0.2919	0.18	0.404	0.057	5.095	0	1.1287	1.022	1.235	0.054	20.74	0	-0.1529
Aphakia and other disorders of lens	sense organs	-0.6737	-2.922	1.575	1.147	-0.587	0.509819	0.0538259	4.83074	10	6521	10	8343	0.556976	0.726799	not_significant	-0.292584	0.254164	1.4319	1.233	1.63	0.101	14.132	0	-0.0498	-0.055	-0.045	0.002	-20.536	0	0.4435	0.307	0.58	0.07	6.356	0	0.2906	0.178	0.403	0.057	5.074	0	1.1258	1.019	1.232	0.054	20.699	0	-0.1533
Aphasia	mental disorders	-0.4503	-1.54	0.639	0.556	-0.81	0.637437	0.214381	1.89459	10	6521	11	8342	0.417958	0.627185	not_significant	-0.195563	0.378867	1.432	1.233	1.631	0.101	14.136	0	-0.0498	-0.055	-0.045	0.002	-20.535	0	0.4426	0.306	0.579	0.07	6.344	0	0.2905	0.178	0.403	0.057	5.073	0	1.1258	1.019	1.232	0.054	20.699	0	-0.1537
Aphasia/speech disturbance	mental disorders	0.5816	-0.057	1.22	0.326	1.786	1.7889	0.944594	3.38719	22	6509	21	8332	0.0740689	0.192104	not_significant	0.252586	1.13036	1.4381	1.239	1.637	0.101	14.188	0	-0.05	-0.055	-0.045	0.002	-20.604	0	0.4421	0.305	0.579	0.07	6.336	0	0.29	0.178	0.402	0.057	5.064	0	1.1258	1.019	1.232	0.054	20.697	0	-0.1533
Aplastic anemia	hematopoietic	1.6099	-1.015	4.235	1.339	1.202	5.00231	0.362402	69.0617	10	6521	10	8343	0.229349	0.416981	not_significant	0.699171	0.639503	1.4346	1.236	1.633	0.101	14.159	0	-0.0499	-0.055	-0.045	0.002	-20.566	0	0.4428	0.306	0.579	0.07	6.347	0	0.2897	0.177	0.402	0.057	5.059	0	1.1252	1.019	1.232	0.054	20.687	0	-0.1536
Apnea	respiratory	-0.1738	-0.621	0.273	0.228	-0.763	0.840465	0.537407	1.3139	30	6501	62	8291	0.445632	0.649533	not_significant	-0.0754804	0.351023	1.4326	1.234	1.631	0.101	14.143	0	-0.0498	-0.055	-0.045	0.002	-20.539	0	0.4427	0.306	0.579	0.07	6.346	0	0.2905	0.178	0.403	0.057	5.072	0	1.1252	1.019	1.232	0.054	20.686	0	-0.1525
Appendiceal conditions	digestive	-0.1648	-1.866	1.536	0.868	-0.19	0.848063	0.154741	4.64597	10	6521	10	8343	0.849418	0.919681	not_significant	-0.0715717	0.0708786	1.4331	1.235	1.632	0.101	14.147	0	-0.0498	-0.055	-0.045	0.002	-20.553	0	0.4427	0.306	0.579	0.07	6.345	0	0.2902	0.178	0.402	0.057	5.068	0	1.1258	1.019	1.232	0.054	20.698	0	-0.1533
Appendicitis	digestive	0.3508	-0.639	1.341	0.505	0.695	1.4202	0.52782	3.82286	10	6521	10	8343	0.487302	0.681707	not_significant	0.152351	0.312202	1.4328	1.234	1.631	0.101	14.145	0	-0.0498	-0.055	-0.045	0.002	-20.554	0	0.4427	0.306	0.579	0.07	6.346	0	0.29	0.178	0.402	0.057	5.065	0	1.1259	1.019	1.233	0.054	20.7	0	-0.1537
Arrhythmia (cardiac) NOS	circulatory system	1.5151	0.92	2.11	0.304	4.991	4.54988	2.50929	8.24824	48	6483	16	8337	5.99827e-07	2.93693e-05	mi_significant	0.658	6.22197	1.4524	1.253	1.651	0.102	14.3	0	-0.0504	-0.055	-0.046	0.002	-20.722	0	0.4417	0.305	0.579	0.07	6.328	0	0.2854	0.173	0.398	0.057	4.979	0	1.1213	1.015	1.228	0.054	20.599	0	-0.1554
Arteritis NOS	circulatory system	1.3123	-1.007	3.632	1.183	1.109	3.71471	0.365313	37.7883	10	6521	10	8343	0.267495	0.461656	not_significant	0.569925	0.572684	1.4323	1.234	1.631	0.101	14.139	0	-0.0498	-0.055	-0.045	0.002	-20.545	0	0.4427	0.306	0.579	0.07	6.346	0	0.2897	0.177	0.402	0.057	5.059	0	1.1255	1.019	1.232	0.054	20.693	0	-0.154
Arthralgia/ankylosis of temporomandibular joint	digestive	-0.3749	-1.015	0.265	0.326	-1.148	0.687358	0.362402	1.30343	15	6516	32	8321	0.250776	0.442034	not_significant	-0.162817	0.600714	1.4348	1.236	1.633	0.101	14.161	0	-0.0498	-0.055	-0.045	0.002	-20.555	0	0.4415	0.305	0.578	0.07	6.328	0	0.2901	0.178	0.402	0.057	5.065	0	1.125	1.018	1.232	0.054	20.681	0	-0.1534
Arthropathy associated with infections	musculoskeletal	-1.4522	-3.693	0.788	1.143	-1.27	0.234055	0.0248972	2.19899	10	6521	10	8343	0.203931	0.392426	not_significant	-0.630682	0.690517	1.4342	1.236	1.633	0.101	14.156	0	-0.0499	-0.055	-0.045	0.002	-20.559	0	0.4436	0.307	0.58	0.07	6.358	0	0.291	0.179	0.403	0.057	5.081	0	1.1261	1.019	1.233	0.054	20.702	0	-0.1536
Arthropathy associated with neurological disorders	musculoskeletal	1.6407	-1.144	4.425	1.421	1.155	5.15878	0.318542	83.5128	10	6521	10	8343	0.248188	0.439229	not_significant	0.712547	0.60522	1.4366	1.238	1.635	0.101	14.172	0	-0.0499	-0.055	-0.045	0.002	-20.575	0	0.4428	0.306	0.58	0.07	6.347	0	0.2897	0.177	0.402	0.057	5.058	0	1.126	1.019	1.233	0.054	20.701	0	-0.1535
Arthropathy associated with other disorders classified elsewhere	musculoskeletal	0.4897	-2.288	3.268	1.417	0.346	1.63183	0.101469	26.2588	10	6521	10	8343	0.72971	0.84695	not_significant	0.212674	0.13685	1.4327	1.234	1.631	0.101	14.143	0	-0.0498	-0.055	-0.045	0.002	-20.55	0	0.4427	0.306	0.579	0.07	6.346	0	0.2902	0.178	0.402	0.057	5.068	0	1.1258	1.019	1.232	0.054	20.699	0	-0.1536
Arthropathy NOS	musculoskeletal	0.4644	0.128	0.801	0.172	2.702	1.59106	1.13655	2.22777	72	6459	79	8274	0.00689605	0.0364663	mi_significant	0.201686	2.1614	1.4429	1.244	1.642	0.101	14.225	0	-0.0503	-0.055	-0.046	0.002	-20.67	0	0.4468	0.31	0.584	0.07	6.401	0	0.2917	0.179	0.404	0.057	5.092	0	1.1302	1.024	1.237	0.054	20.763	0	-0.1494
Arthropod-borne diseases	infectious diseases	-0.0647	-1.894	1.764	0.933	-0.069	0.937349	0.150469	5.83573	10	6521	10	8343	0.944692	0.976992	not_significant	-0.0280989	0.0247099	1.433	1.234	1.632	0.101	14.145	0	-0.0498	-0.055	-0.045	0.002	-20.552	0	0.4427	0.306	0.579	0.07	6.346	0	0.2902	0.178	0.402	0.057	5.068	0	1.1259	1.019	1.232	0.054	20.699	0	-0.1534
Articular cartilage disorder	musculoskeletal	0.1257	-0.545	0.797	0.342	0.367	1.13394	0.579842	2.21887	15	6516	24	8329	0.713524	0.835107	not_significant	0.0545908	0.146592	1.4335	1.235	1.632	0.101	14.149	0	-0.0499	-0.055	-0.045	0.002	-20.555	0	0.4427	0.306	0.579	0.07	6.346	0	0.2904	0.178	0.403	0.057	5.07	0	1.1261	1.019	1.233	0.054	20.702	0	-0.1534
Ascites (non malignant)	digestive	2.1737	1.077	3.271	0.56	3.884	8.79075	2.93586	26.3377	24	6507	10	8343	0.000102952	0.00158259	mi_significant	0.944026	3.98737	1.4338	1.235	1.633	0.101	14.131	0	-0.05	-0.055	-0.045	0.002	-20.578	0	0.4396	0.303	0.577	0.07	6.294	0	0.2935	0.181	0.406	0.057	5.12	0	1.1288	1.022	1.236	0.054	20.734	0	-0.1504
ASCVD		-0.0318	-1.289	1.226	0.642	-0.05	0.9687	0.275546	3.40757	10	6521	10	8343	0.960412	0.983949	not_significant	-0.0138106	0.0175425	1.4329	1.234	1.631	0.101	14.143	0	-0.0498	-0.055	-0.045	0.002	-20.547	0	0.4427	0.306	0.579	0.07	6.346	0	0.2903	0.178	0.403	0.057	5.067	0	1.1258	1.019	1.232	0.054	20.699	0	-0.1534
Aseptic necrosis of bone	musculoskeletal	0.5205	-0.689	1.73	0.617	0.843	1.68287	0.502078	5.64065	10	6521	10	8343	0.399159	0.60716	not_significant	0.22605	0.398854	1.4327	1.234	1.631	0.101	14.144	0	-0.0498	-0.055	-0.045	0.002	-20.552	0	0.4425	0.306	0.579	0.07	6.343	0	0.2888	0.176	0.401	0.057	5.04	0	1.1255	1.019	1.232	0.054	20.694	0	-0.1536
Asphyxia and hypoxemia		1.2752	0.694	1.856	0.296	4.303	3.57942	2.00171	6.39809	37	6494	20	8333	1.68221e-05	0.000383428	mi_significant	0.553812	4.77412	1.4424	1.244	1.641	0.101	14.235	0	-0.0502	-0.055	-0.045	0.002	-20.691	0	0.4455	0.309	0.582	0.07	6.383	0	0.2875	0.175	0.4	0.057	5.016	0	1.1296	1.023	1.236	0.054	20.749	0	-0.1534
Asthma	respiratory	0.2655	0.042	0.489	0.114	2.332	1.30408	1.04289	1.63068	161	6370	188	8165	0.0197036	0.0781773	not_significant	0.115305	1.70546	1.4337	1.235	1.632	0.101	14.146	0	-0.05	-0.055	-0.045	0.002	-20.61	0	0.4458	0.309	0.583	0.07	6.388	0	0.2924	0.18	0.405	0.057	5.104	0	1.1282	1.022	1.235	0.054	20.735	0	-0.1538
Asthma with exacerbation	respiratory	-0.0236	-0.37	0.323	0.177	-0.133	0.976676	0.690734	1.38127	55	6476	90	8263	0.893858	0.945153	not_significant	-0.0102493	0.0487317	1.4332	1.235	1.632	0.101	14.146	0	-0.0498	-0.055	-0.045	0.002	-20.552	0	0.4425	0.306	0.579	0.07	6.343	0	0.2901	0.178	0.402	0.057	5.066	0	1.1256	1.019	1.232	0.054	20.685	0	-0.1534
Astigmatism	sense organs	0.4991	0.166	0.832	0.17	2.936	1.64724	1.18057	2.29791	79	6452	77	8276	0.00332419	0.0216481	mi_significant	0.216756	2.47831	1.4432	1.245	1.642	0.101	14.238	0	-0.0503	-0.055	-0.046	0.002	-20.693	0	0.4427	0.306	0.579	0.07	6.344	0	0.2917	0.179	0.404	0.057	5.092	0	1.1284	1.022	1.235	0.054	20.737	0	-0.1496
Atherosclerosis	circulatory system	1.2884	-0.121	2.697	0.719	1.792	3.62698	0.886034	14.8352	10	6521	10	8343	0.0730804	0.191311	not_significant	0.559545	1.1362	1.4388	1.24	1.637	0.101	14.192	0	-0.05	-0.055	-0.045	0.002	-20.596	0	0.442	0.305	0.579	0.07	6.336	0	0.2893	0.177	0.402	0.057	5.052	0	1.1244	1.018	1.231	0.054	20.669	0	-0.1537
Atherosclerosis of aorta	circulatory system	1.2313	0.531	1.932	0.358	3.444	3.42568	1.70063	6.9033	19	6512	17	8336	0.000573787	0.00587309	mi_significant	0.534747	3.24125	1.4588	1.26	1.658	0.102	14.356	0	-0.0505	-0.055	-0.046	0.002	-20.759	0	0.4328	0.296	0.57	0.07	6.197	0	0.2901	0.178	0.402	0.057	5.063	0	1.128	1.021	1.235	0.054	20.728	0	-0.1543
Atherosclerosis of native arteries of the extremities with intermittent claudication	circulatory system	1.6568	-0.119	3.432	0.906	1.829	5.24251	0.887808	30.9385	10	6521	10	8343	0.0674001	0.180006	not_significant	0.719539	1.17134	1.4384	1.24	1.637	0.101	14.188	0	-0.05	-0.055	-0.045	0.002	-20.6	0	0.4441	0.307	0.581	0.07	6.365	0	0.2915	0.179	0.404	0.057	5.09	0	1.1264	1.02	1.233	0.054	20.707	0	-0.1525
Atherosclerosis of renal artery	circulatory system	1.8112	-0.515	4.137	1.187	1.526	6.11778	0.597501	62.6147	10	6521	10	8343	0.126956	0.284289	not_significant	0.786594	0.896347	1.4345	1.236	1.633	0.101	14.155	0	-0.0499	-0.055	-0.045	0.002	-20.572	0	0.444	0.307	0.581	0.07	6.364	0	0.2915	0.179	0.404	0.057	5.089	0	1.1267	1.02	1.233	0.054	20.711	0	-0.1524
Atherosclerosis of the extremities	circulatory system	1.3583	0.202	2.515	0.59	2.302	3.88958	1.22385	12.3666	10	6521	10	8343	0.0213361	0.0824747	not_significant	0.589902	1.67088	1.4423	1.243	1.641	0.101	14.22	0	-0.0501	-0.055	-0.045	0.002	-20.634	0	0.4451	0.308	0.582	0.07	6.378	0	0.2909	0.179	0.403	0.057	5.078	0	1.1264	1.02	1.233	0.054	20.706	0	-0.1513
Atopic/contact dermatitis due to other or unspecified	dermatologic	0.2557	0.078	0.433	0.091	2.818	1.29137	1.08112	1.54188	258	6273	299	8054	0.00483175	0.0277721	mi_significant	0.111049	2.3159	1.4292	1.231	1.628	0.101	14.103	0	-0.0501	-0.055	-0.045	0.002	-20.622	0	0.4479	0.311	0.585	0.07	6.417	0	0.2962	0.184	0.409	0.057	5.167	0	1.1308	1.024	1.238	0.054	20.77	0	-0.1526
Atrial fibrillation	circulatory system	0.3953	-0.062	0.853	0.233	1.693	1.48483	0.939883	2.34668	37	6494	48	8305	0.0903899	0.222524	not_significant	0.171677	1.04388	1.4444	1.245	1.643	0.102	14.227	0	-0.0502	-0.055	-0.045	0.002	-20.62	0	0.4434	0.307	0.58	0.07	6.356	0	0.2892	0.177	0.401	0.057	5.05	0	1.1259	1.019	1.232	0.054	20.698	0	-0.1528
Atrial flutter	circulatory system	1.7744	0.869	2.68	0.462	3.84	5.89674	2.38453	14.5851	17	6514	10	8343	0.000122981	0.00182676	mi_significant	0.770612	3.91016	1.4548	1.256	1.654	0.102	14.332	0	-0.0504	-0.055	-0.046	0.002	-20.744	0	0.4422	0.305	0.579	0.07	6.336	0	0.2873	0.175	0.4	0.057	5.014	0	1.1268	1.02	1.234	0.054	20.706	0	-0.1545
Atrophic gastritis	digestive	0.5513	0.156	0.947	0.202	2.735	1.73551	1.16883	2.57796	54	6477	56	8297	0.0062472	0.0342689	mi_significant	0.239427	2.20431	1.4388	1.24	1.637	0.101	14.197	0	-0.0501	-0.055	-0.045	0.002	-20.644	0	0.447	0.31	0.584	0.07	6.404	0	0.2933	0.181	0.406	0.057	5.119	0	1.1285	1.022	1.235	0.054	20.738	0	-0.1533
Attention deficit hyperactivity disorder	mental disorders	0.0542	-0.333	0.441	0.198	0.275	1.0557	0.71677	1.55426	47	6484	66	8287	0.78365	0.874702	not_significant	0.0235388	0.105878	1.4323	1.234	1.631	0.101	14.134	0	-0.0498	-0.055	-0.045	0.002	-20.549	0	0.443	0.306	0.58	0.07	6.35	0	0.2902	0.178	0.402	0.057	5.068	0	1.1261	1.019	1.233	0.054	20.701	0	-0.1536
Autism	mental disorders	-1.519	-3.664	0.626	1.094	-1.388	0.218931	0.0256298	1.87012	10	6521	10	8343	0.165062	0.339366	not_significant	-0.659693	0.782352	1.436	1.237	1.635	0.101	14.171	0	-0.0499	-0.055	-0.045	0.002	-20.566	0	0.4416	0.305	0.578	0.07	6.329	0	0.29	0.178	0.402	0.057	5.064	0	1.1247	1.018	1.231	0.054	20.675	0	-0.154
Autoimmune disease NEC	endocrine/metabolic	0.0952	-1.949	2.139	1.043	0.091	1.09988	0.142416	8.49094	10	6521	10	8343	0.927284	0.966012	not_significant	0.0413448	0.0327874	1.433	1.234	1.632	0.101	14.145	0	-0.0498	-0.055	-0.045	0.002	-20.552	0	0.4427	0.306	0.579	0.07	6.346	0	0.2901	0.178	0.402	0.057	5.066	0	1.1258	1.019	1.232	0.054	20.698	0	-0.1534
Back pain	symptoms	0.2697	0.101	0.439	0.086	3.13	1.30957	1.10628	1.55116	291	6240	328	8025	0.00175041	0.0132991	mi_significant	0.117129	2.75686	1.4282	1.23	1.627	0.101	14.094	0	-0.0501	-0.055	-0.045	0.002	-20.634	0	0.4499	0.313	0.587	0.07	6.444	0	0.2935	0.181	0.406	0.057	5.123	0	1.1312	1.024	1.238	0.054	20.777	0	-0.1518
Bacteremia	infectious diseases	1.0489	0.243	1.855	0.411	2.552	2.85451	1.27507	6.3917	17	6514	11	8342	0.0107257	0.0501039	not_significant	0.455531	1.96957	1.4351	1.237	1.634	0.101	14.162	0	-0.05	-0.055	-0.045	0.002	-20.597	0	0.4448	0.308	0.582	0.07	6.373	0	0.2912	0.179	0.403	0.057	5.083	0	1.1287	1.022	1.235	0.054	20.74	0	-0.152
Bacterial enteritis	infectious diseases	1.476	0.803	2.149	0.344	4.297	4.37541	2.23223	8.57628	33	6498	13	8340	1.73369e-05	0.000388465	mi_significant	0.641019	4.76103	1.4432	1.244	1.642	0.101	14.229	0	-0.0502	-0.055	-0.045	0.002	-20.656	0	0.4425	0.306	0.579	0.07	6.341	0	0.2883	0.176	0.401	0.057	5.031	0	1.1257	1.019	1.232	0.054	20.686	0	-0.1557
Bacterial infection NOS	infectious diseases	0.4409	0.006	0.876	0.222	1.986	1.55411	1.00602	2.40128	44	6487	47	8306	0.0469962	0.141202	not_significant	0.19148	1.32794	1.4363	1.238	1.635	0.101	14.174	0	-0.0499	-0.055	-0.045	0.002	-20.59	0	0.4421	0.305	0.579	0.07	6.337	0	0.2881	0.176	0.4	0.057	5.029	0	1.1254	1.019	1.232	0.054	20.691	0	-0.1564
Bacterial pneumonia	respiratory	0.9104	0.134	1.687	0.396	2.297	2.48532	1.14339	5.40325	17	6514	13	8340	0.0216157	0.0830696	not_significant	0.395382	1.66523	1.4381	1.24	1.637	0.101	14.192	0	-0.05	-0.055	-0.045	0.002	-20.619	0	0.4453	0.309	0.582	0.07	6.381	0	0.2918	0.179	0.404	0.057	5.094	0	1.1267	1.02	1.233	0.054	20.711	0	-0.153
Balanoposthitis	genitourinary	-0.0513	-0.738	0.635	0.35	-0.146	0.949994	0.478069	1.88702	15	6516	21	8332	0.883529	0.940439	not_significant	-0.0222793	0.0537793	1.4333	1.235	1.632	0.101	14.145	0	-0.0498	-0.055	-0.045	0.002	-20.552	0	0.4427	0.306	0.579	0.07	6.346	0	0.2902	0.178	0.402	0.057	5.068	0	1.1258	1.019	1.232	0.054	20.698	0	-0.1533
Bariatric surgery	digestive	1.6618	0.799	2.525	0.44	3.773	5.26879	2.22332	12.4909	24	6507	10	8343	0.000161247	0.00226775	mi_significant	0.721711	3.79251	1.4316	1.233	1.63	0.101	14.124	0	-0.0499	-0.055	-0.045	0.002	-20.551	0	0.4412	0.304	0.578	0.07	6.321	0	0.2877	0.175	0.4	0.057	5.021	0	1.1271	1.02	1.234	0.054	20.715	0	-0.1552
Barrett's esophagus	digestive	0.7184	-0.262	1.698	0.5	1.437	2.05115	0.769511	5.46301	10	6521	10	8343	0.150772	0.319782	not_significant	0.311997	0.82168	1.4379	1.239	1.637	0.101	14.186	0	-0.05	-0.055	-0.045	0.002	-20.594	0	0.4429	0.306	0.58	0.07	6.348	0	0.2907	0.178	0.403	0.057	5.076	0	1.1256	1.019	1.232	0.054	20.692	0	-0.153
Basal cell carcinoma	neoplasms	0.0364	-0.403	0.475	0.224	0.163	1.03707	0.668312	1.60801	34	6497	64	8289	0.870888	0.929979	not_significant	0.0158083	0.0600377	1.4339	1.235	1.633	0.101	14.132	0	-0.0499	-0.055	-0.045	0.002	-20.506	0	0.4428	0.306	0.58	0.07	6.347	0	0.2902	0.178	0.402	0.057	5.068	0	1.1259	1.019	1.232	0.054	20.7	0	-0.1534
Benign neoplasm of adrenal gland	neoplasms	1.033	-0.601	2.667	0.834	1.239	2.80948	0.548263	14.3967	10	6521	10	8343	0.215327	0.403205	not_significant	0.448626	0.666901	1.4361	1.237	1.635	0.101	14.172	0	-0.0499	-0.055	-0.045	0.002	-20.58	0	0.4427	0.306	0.579	0.07	6.346	0	0.2899	0.178	0.402	0.057	5.062	0	1.1264	1.02	1.233	0.054	20.708	0	-0.1533
Benign neoplasm of bone and articular cartilage	neoplasms	0.2603	-0.864	1.385	0.574	0.454	1.29732	0.421473	3.99483	10	6521	10	8343	0.650006	0.786192	not_significant	0.113047	0.187083	1.4325	1.234	1.631	0.101	14.141	0	-0.0498	-0.055	-0.045	0.002	-20.553	0	0.4428	0.306	0.58	0.07	6.347	0	0.2902	0.178	0.402	0.057	5.067	0	1.1262	1.02	1.233	0.054	20.704	0	-0.1531
Benign neoplasm of brain, cranial nerves, meninges	neoplasms	0.0776	-1.068	1.223	0.584	0.133	1.08069	0.343695	3.39736	10	6521	10	8343	0.894398	0.945153	not_significant	0.0337013	0.0484691	1.4332	1.235	1.632	0.101	14.146	0	-0.0498	-0.055	-0.045	0.002	-20.551	0	0.4427	0.306	0.579	0.07	6.346	0	0.2902	0.178	0.402	0.057	5.068	0	1.1259	1.019	1.233	0.054	20.7	0	-0.1534
Benign neoplasm of colon	neoplasms	-0.1466	-0.316	0.022	0.086	-1.7	0.863639	0.729059	1.02224	224	6307	496	7857	0.089197	0.222275	not_significant	-0.0636676	1.04965	1.4134	1.214	1.613	0.102	13.877	0	-0.0491	-0.054	-0.044	0.002	-20.026	0	0.4391	0.302	0.576	0.07	6.292	0	0.2877	0.175	0.4	0.057	5.021	0	1.1225	1.016	1.229	0.054	20.626	0	-0.1516
Benign neoplasm of eye, uveal	neoplasms	-0.2013	-1.412	1.009	0.618	-0.326	0.817667	0.243655	2.74286	10	6521	10	8343	0.744456	0.851352	not_significant	-0.0874235	0.128161	1.4331	1.235	1.632	0.101	14.147	0	-0.0498	-0.055	-0.045	0.002	-20.549	0	0.4428	0.306	0.579	0.07	6.347	0	0.2899	0.178	0.402	0.057	5.061	0	1.1255	1.019	1.232	0.054	20.689	0	-0.1535
Benign neoplasm of kidney and other urinary organs	neoplasms	-0.3752	-2.647	1.896	1.159	-0.324	0.687152	0.0708635	6.6592	10	6521	10	8343	0.746162	0.851642	not_significant	-0.162947	0.127167	1.4326	1.234	1.631	0.101	14.141	0	-0.0498	-0.055	-0.045	0.002	-20.538	0	0.4426	0.306	0.579	0.07	6.345	0	0.2898	0.178	0.402	0.057	5.06	0	1.1254	1.019	1.232	0.054	20.687	0	-0.1538
Benign neoplasm of lip, oral cavity, and pharynx	neoplasms	0.2415	-0.895	1.378	0.58	0.416	1.27316	0.408608	3.96696	10	6521	10	8343	0.677093	0.802076	not_significant	0.104882	0.169352	1.4328	1.234	1.631	0.101	14.144	0	-0.0498	-0.055	-0.045	0.002	-20.554	0	0.4427	0.306	0.579	0.07	6.346	0	0.2905	0.178	0.403	0.057	5.072	0	1.1261	1.019	1.233	0.054	20.702	0	-0.1532
Benign neoplasm of male genital organs	neoplasms	2.3282	0.781	3.876	0.79	2.949	10.2595	2.18365	48.2309	12	6519	10	8343	0.00319155	0.0210499	mi_significant	1.01112	2.496	1.4398	1.241	1.639	0.101	14.201	0	-0.05	-0.055	-0.045	0.002	-20.612	0	0.4424	0.306	0.579	0.07	6.34	0	0.2896	0.177	0.402	0.057	5.056	0	1.1245	1.018	1.231	0.054	20.668	0	-0.1548
Benign neoplasm of other parts of digestive system	neoplasms	-0.1377	-0.728	0.453	0.301	-0.457	0.87136	0.482874	1.57302	18	6513	36	8317	0.6475	0.783879	not_significant	-0.0598024	0.18876	1.4324	1.234	1.631	0.101	14.137	0	-0.0498	-0.055	-0.045	0.002	-20.532	0	0.4425	0.306	0.579	0.07	6.343	0	0.2903	0.178	0.403	0.057	5.069	0	1.1255	1.019	1.232	0.054	20.692	0	-0.1534
Benign neoplasm of parathyroid gland	neoplasms	0.9252	-1.658	3.509	1.318	0.702	2.52237	0.19052	33.4148	10	6521	10	8343	0.482763	0.678025	not_significant	0.401809	0.316266	1.4326	1.234	1.631	0.101	14.141	0	-0.0498	-0.055	-0.045	0.002	-20.548	0	0.4427	0.306	0.579	0.07	6.346	0	0.2902	0.178	0.402	0.057	5.068	0	1.1257	1.019	1.232	0.054	20.696	0	-0.1538
Benign neoplasm of pituitary gland and craniopharyngeal duct (pouch)	neoplasms	2.1867	0.074	4.299	1.078	2.029	8.90578	1.07681	73.6261	10	6521	10	8343	0.0424908	0.131923	not_significant	0.949672	1.3717	1.4309	1.232	1.629	0.101	14.121	0	-0.0498	-0.055	-0.045	0.002	-20.523	0	0.4375	0.301	0.574	0.07	6.267	0	0.2889	0.177	0.401	0.057	5.043	0	1.1253	1.019	1.232	0.054	20.69	0	-0.1543
Benign neoplasm of respiratory and intrathoracic organs	neoplasms	-0.6022	-2.819	1.615	1.131	-0.532	0.547606	0.0596656	5.02789	10	6521	10	8343	0.594496	0.7528	not_significant	-0.261532	0.225851	1.4326	1.234	1.631	0.101	14.142	0	-0.0498	-0.055	-0.045	0.002	-20.546	0	0.4425	0.306	0.579	0.07	6.343	0	0.2902	0.178	0.402	0.057	5.068	0	1.1256	1.019	1.232	0.054	20.695	0	-0.1533
Benign neoplasm of skin	neoplasms	0.0883	-0.057	0.234	0.074	1.19	1.09232	0.944594	1.26364	364	6167	505	7848	0.233921	0.419928	not_significant	0.0383482	0.630931	1.4343	1.236	1.633	0.101	14.157	0	-0.05	-0.055	-0.045	0.002	-20.583	0	0.4446	0.308	0.581	0.07	6.372	0	0.2907	0.178	0.403	0.057	5.076	0	1.1266	1.02	1.233	0.054	20.711	0	-0.1548
Benign neoplasm of unspecified sites	neoplasms	-0.3614	-1.048	0.325	0.35	-1.032	0.6967	0.350638	1.38403	12	6519	32	8321	0.301963	0.50531	not_significant	-0.156954	0.520047	1.4308	1.232	1.629	0.101	14.121	0	-0.0497	-0.054	-0.045	0.002	-20.499	0	0.4416	0.305	0.578	0.07	6.329	0	0.2899	0.178	0.402	0.057	5.061	0	1.1247	1.018	1.231	0.054	20.675	0	-0.1541
Bipolar	mental disorders	0.5296	-0.224	1.283	0.384	1.378	1.69825	0.799315	3.60745	17	6514	13	8340	0.168198	0.343145	not_significant	0.230002	0.774179	1.4319	1.233	1.63	0.101	14.134	0	-0.0498	-0.055	-0.045	0.002	-20.556	0	0.4432	0.306	0.58	0.07	6.352	0	0.2907	0.178	0.403	0.057	5.075	0	1.1265	1.02	1.233	0.054	20.709	0	-0.1523
Bladder neck obstruction	genitourinary	0.5864	-0.719	1.892	0.666	0.881	1.79751	0.487239	6.63262	10	6521	10	8343	0.378588	0.583326	not_significant	0.25467	0.421833	1.4335	1.235	1.632	0.101	14.15	0	-0.0498	-0.055	-0.045	0.002	-20.557	0	0.4427	0.306	0.579	0.07	6.347	0	0.2902	0.178	0.402	0.057	5.068	0	1.1256	1.019	1.232	0.054	20.694	0	-0.1544
Blindness and low vision	sense organs	0.476	-0.042	0.994	0.264	1.802	1.60962	0.95887	2.70202	28	6503	35	8318	0.0715435	0.18766	not_significant	0.206724	1.14543	1.439	1.24	1.638	0.101	14.197	0	-0.05	-0.055	-0.045	0.002	-20.614	0	0.443	0.306	0.58	0.07	6.35	0	0.2904	0.178	0.403	0.057	5.071	0	1.1272	1.021	1.234	0.054	20.721	0	-0.1538
Blister	injuries & poisonings	0.7434	-0.159	1.646	0.461	1.614	2.10307	0.852996	5.18619	11	6520	10	8343	0.10649	0.24829	not_significant	0.322855	0.97269	1.4352	1.237	1.634	0.101	14.166	0	-0.0499	-0.055	-0.045	0.002	-20.586	0	0.4433	0.307	0.58	0.07	6.354	0	0.2912	0.179	0.403	0.057	5.085	0	1.1271	1.02	1.234	0.054	20.718	0	-0.1526
Blood in stool	digestive	0.412	0.063	0.761	0.178	2.312	1.50983	1.06503	2.14042	68	6463	69	8284	0.0207856	0.0810578	not_significant	0.178929	1.68224	1.4299	1.231	1.628	0.101	14.114	0	-0.0499	-0.055	-0.045	0.002	-20.589	0	0.4468	0.31	0.584	0.07	6.402	0	0.2931	0.181	0.405	0.057	5.116	0	1.1304	1.024	1.237	0.054	20.763	0	-0.1501
Blood vessel replaced	circulatory system	1.5566	0.659	2.455	0.458	3.397	4.74267	1.93286	11.6464	22	6509	10	8343	0.000680268	0.0066126	mi_significant	0.676023	3.16732	1.4357	1.237	1.634	0.101	14.158	0	-0.05	-0.055	-0.045	0.002	-20.587	0	0.4434	0.307	0.58	0.07	6.353	0	0.2896	0.177	0.402	0.057	5.055	0	1.1264	1.02	1.233	0.054	20.701	0	-0.153
Bone cancer	neoplasms	1.9152	0.265	3.565	0.842	2.275	6.7883	1.30343	35.3395	10	6521	10	8343	0.0229174	0.0865804	not_significant	0.831761	1.63983	1.4352	1.237	1.634	0.101	14.165	0	-0.0499	-0.055	-0.045	0.002	-20.571	0	0.4416	0.305	0.578	0.07	6.33	0	0.2896	0.177	0.402	0.057	5.057	0	1.1251	1.019	1.232	0.054	20.684	0	-0.1553
Bone marrow or stem cell transplant	neoplasms	1.5773	0.301	2.854	0.651	2.422	4.84187	1.35121	17.3571	14	6517	10	8343	0.0154269	0.0655768	not_significant	0.685013	1.81172	1.4295	1.231	1.628	0.101	14.101	0	-0.0498	-0.055	-0.045	0.002	-20.512	0	0.4437	0.307	0.58	0.07	6.36	0	0.2882	0.176	0.401	0.057	5.032	0	1.1249	1.018	1.232	0.054	20.677	0	-0.1536
Broken tooth	injuries & poisonings	1.0031	-0.568	2.575	0.802	1.251	2.72672	0.566658	13.1313	10	6521	10	8343	0.210884	0.398269	not_significant	0.435641	0.675956	1.4339	1.235	1.632	0.101	14.153	0	-0.0499	-0.055	-0.045	0.002	-20.572	0	0.4436	0.307	0.58	0.07	6.357	0	0.2918	0.18	0.404	0.057	5.094	0	1.1272	1.021	1.234	0.054	20.718	0	-0.1519
Bronchiectasis	respiratory	1.7091	0.576	2.842	0.578	2.956	5.52399	1.77891	17.15	13	6518	10	8343	0.00311625	0.0207019	mi_significant	0.742253	2.50637	1.4357	1.237	1.634	0.101	14.172	0	-0.05	-0.055	-0.045	0.002	-20.598	0	0.4446	0.308	0.581	0.07	6.372	0	0.2892	0.177	0.402	0.057	5.048	0	1.1274	1.021	1.234	0.054	20.719	0	-0.1541
Bronchitis	respiratory	0.154	-0.151	0.46	0.156	0.988	1.16649	0.859848	1.58407	76	6455	109	8244	0.323071	0.529919	not_significant	0.0668814	0.490701	1.4345	1.236	1.633	0.101	14.158	0	-0.0499	-0.055	-0.045	0.002	-20.573	0	0.4443	0.308	0.581	0.07	6.367	0	0.2885	0.176	0.401	0.057	5.035	0	1.1272	1.021	1.234	0.054	20.716	0	-0.1532
Bronchopneumonia and lung abscess	respiratory	-0.0007	-1.097	1.096	0.559	-0.001	0.9993	0.333871	2.99217	10	6521	10	8343	0.998952	0.998952	not_significant	-0.000304006	0.000455225	1.433	1.234	1.632	0.101	14.144	0	-0.0498	-0.055	-0.045	0.002	-20.551	0	0.4427	0.306	0.579	0.07	6.346	0	0.2902	0.178	0.402	0.057	5.068	0	1.1258	1.019	1.232	0.054	20.699	0	-0.1534
Bundle branch block	circulatory system	0.6358	-1.107	2.379	0.889	0.715	1.88853	0.330549	10.7941	10	6521	10	8343	0.474683	0.672595	not_significant	0.276124	0.323596	1.4347	1.236	1.633	0.101	14.158	0	-0.0499	-0.055	-0.045	0.002	-20.564	0	0.443	0.306	0.58	0.07	6.35	0	0.2904	0.178	0.403	0.057	5.072	0	1.1261	1.02	1.233	0.054	20.704	0	-0.1537
Burns		0.6869	0.027	1.346	0.336	2.042	1.98754	1.02737	3.84203	22	6509	18	8335	0.0411926	0.130407	not_significant	0.298317	1.38518	1.4335	1.235	1.632	0.101	14.152	0	-0.0499	-0.055	-0.045	0.002	-20.576	0	0.4428	0.306	0.58	0.07	6.346	0	0.2897	0.177	0.402	0.057	5.059	0	1.1264	1.02	1.233	0.054	20.707	0	-0.154
Bursitis	musculoskeletal	0.1165	-0.17	0.403	0.146	0.797	1.12356	0.843665	1.49631	88	6443	123	8230	0.425336	0.631083	not_significant	0.0505953	0.371268	1.435	1.236	1.634	0.101	14.159	0	-0.0499	-0.055	-0.045	0.002	-20.561	0	0.4435	0.307	0.58	0.07	6.357	0	0.2903	0.178	0.403	0.057	5.07	0	1.1264	1.02	1.233	0.054	20.707	0	-0.1531
Bursitis disorders	musculoskeletal	0.8411	-0.61	2.292	0.74	1.136	2.31892	0.543351	9.89471	10	6521	10	8343	0.255932	0.447842	not_significant	0.365285	0.591875	1.4348	1.236	1.633	0.101	14.163	0	-0.0499	-0.055	-0.045	0.002	-20.577	0	0.4437	0.307	0.58	0.07	6.359	0	0.2907	0.178	0.403	0.057	5.075	0	1.1262	1.02	1.233	0.054	20.704	0	-0.1526
Cachexia	endocrine/metabolic	3.0102	0.944	5.077	1.054	2.855	20.2915	2.57024	160.292	16	6515	10	8343	0.00430627	0.0254147	mi_significant	1.30731	2.3659	1.4296	1.231	1.628	0.101	14.099	0	-0.0498	-0.055	-0.045	0.002	-20.514	0	0.4441	0.307	0.581	0.07	6.365	0	0.2882	0.176	0.401	0.057	5.03	0	1.1248	1.018	1.231	0.054	20.672	0	-0.1546
Calcaneal spur; Exostosis NOS	musculoskeletal	-0.3809	-0.905	0.144	0.268	-1.423	0.683246	0.404542	1.15488	21	6510	53	8300	0.154756	0.326816	not_significant	-0.165423	0.810353	1.4293	1.231	1.628	0.101	14.106	0	-0.0497	-0.054	-0.045	0.002	-20.492	0	0.4428	0.306	0.58	0.07	6.347	0	0.2914	0.179	0.404	0.057	5.088	0	1.1256	1.019	1.232	0.054	20.695	0	-0.1524
Calculus of bile duct	digestive	-0.1099	-1.15	0.93	0.53	-0.207	0.895924	0.316637	2.53451	10	6521	10	8343	0.835821	0.912432	not_significant	-0.047729	0.0778869	1.4332	1.235	1.632	0.101	14.147	0	-0.0498	-0.055	-0.045	0.002	-20.553	0	0.4427	0.306	0.579	0.07	6.345	0	0.2904	0.178	0.403	0.057	5.07	0	1.1258	1.019	1.232	0.054	20.699	0	-0.1533
Calculus of kidney	genitourinary	0.2392	-0.068	0.547	0.157	1.524	1.27023	0.93426	1.72806	82	6449	100	8253	0.127428	0.284289	not_significant	0.103883	0.894734	1.4343	1.236	1.633	0.101	14.155	0	-0.05	-0.055	-0.045	0.002	-20.588	0	0.4442	0.307	0.581	0.07	6.366	0	0.2916	0.179	0.404	0.057	5.091	0	1.127	1.02	1.234	0.054	20.718	0	-0.153
Calculus of lower urinary tract	genitourinary	-0.267	-1.745	1.211	0.754	-0.354	0.765673	0.174645	3.35684	10	6521	10	8343	0.723329	0.841762	not_significant	-0.115957	0.140664	1.4329	1.234	1.631	0.101	14.145	0	-0.0498	-0.055	-0.045	0.002	-20.552	0	0.4431	0.306	0.58	0.07	6.351	0	0.2902	0.178	0.402	0.057	5.068	0	1.126	1.019	1.233	0.054	20.702	0	-0.1532
Calculus of ureter	genitourinary	-0.3274	-0.98	0.325	0.333	-0.984	0.720795	0.375311	1.38403	14	6517	32	8321	0.325303	0.532901	not_significant	-0.142188	0.487712	1.4326	1.234	1.631	0.101	14.143	0	-0.0498	-0.055	-0.045	0.002	-20.53	0	0.4428	0.306	0.58	0.07	6.347	0	0.2896	0.177	0.402	0.057	5.057	0	1.1247	1.018	1.231	0.054	20.675	0	-0.1539
Cancer of bladder	neoplasms	0.0846	-1.784	1.953	0.953	0.089	1.08828	0.167965	7.04981	10	6521	10	8343	0.929305	0.967355	not_significant	0.0367413	0.0318419	1.4331	1.235	1.632	0.101	14.146	0	-0.0498	-0.055	-0.045	0.002	-20.55	0	0.4428	0.306	0.579	0.07	6.347	0	0.2902	0.178	0.402	0.057	5.068	0	1.1258	1.019	1.232	0.054	20.699	0	-0.1534
Cancer of brain	neoplasms	0.9202	-0.364	2.204	0.655	1.405	2.50979	0.694891	9.06119	10	6521	10	8343	0.160124	0.333886	not_significant	0.399638	0.795544	1.4336	1.235	1.632	0.101	14.15	0	-0.0499	-0.055	-0.045	0.002	-20.56	0	0.4417	0.305	0.578	0.07	6.33	0	0.2895	0.177	0.402	0.057	5.055	0	1.1258	1.019	1.232	0.054	20.698	0	-0.1536
Cancer of brain and nervous system	neoplasms	-0.4704	-2.218	1.277	0.892	-0.528	0.624752	0.108827	3.58587	10	6521	10	8343	0.597772	0.755811	not_significant	-0.204292	0.223465	1.4329	1.234	1.631	0.101	14.145	0	-0.0498	-0.055	-0.045	0.002	-20.55	0	0.4425	0.306	0.579	0.07	6.344	0	0.2902	0.178	0.402	0.057	5.067	0	1.1259	1.019	1.233	0.054	20.701	0	-0.1534
Cancer of bronchus; lung	neoplasms	0.9925	0.02	1.965	0.496	2.001	2.69797	1.0202	7.13491	13	6518	10	8343	0.0453961	0.13828	not_significant	0.431037	1.34298	1.4383	1.24	1.637	0.101	14.194	0	-0.05	-0.055	-0.045	0.002	-20.608	0	0.4417	0.305	0.578	0.07	6.331	0	0.2891	0.177	0.401	0.057	5.048	0	1.1252	1.019	1.232	0.054	20.684	0	-0.153
Cancer of connective tissue	neoplasms	1.3187	-0.01	2.647	0.678	1.945	3.73856	0.99005	14.1116	10	6521	10	8343	0.0517475	0.149694	not_significant	0.572704	1.28611	1.4386	1.24	1.637	0.101	14.193	0	-0.05	-0.055	-0.045	0.002	-20.603	0	0.4434	0.307	0.58	0.07	6.355	0	0.2894	0.177	0.402	0.057	5.052	0	1.1251	1.018	1.232	0.054	20.681	0	-0.1534
Cancer of intrathoracic organs	neoplasms	0.7942	-1.784	3.373	1.316	0.604	2.21267	0.167965	29.1659	10	6521	10	8343	0.546062	0.721891	not_significant	0.344917	0.262758	1.4323	1.234	1.631	0.101	14.138	0	-0.0498	-0.055	-0.045	0.002	-20.547	0	0.443	0.306	0.58	0.07	6.351	0	0.2905	0.178	0.403	0.057	5.073	0	1.126	1.019	1.233	0.054	20.702	0	-0.1533
Cancer of larynx	neoplasms	0.6226	-2.179	3.425	1.43	0.436	1.86377	0.113155	30.7226	10	6521	10	8343	0.663184	0.794859	not_significant	0.270392	0.178366	1.4337	1.235	1.632	0.101	14.15	0	-0.0499	-0.055	-0.045	0.002	-20.556	0	0.4427	0.306	0.579	0.07	6.347	0	0.2902	0.178	0.402	0.057	5.068	0	1.1257	1.019	1.232	0.054	20.696	0	-0.1535
Cancer of major salivary glands	neoplasms	0.7953	-2.502	4.092	1.682	0.473	2.21511	0.081921	59.8595	10	6521	10	8343	0.636376	0.780611	not_significant	0.345394	0.196286	1.4337	1.235	1.632	0.101	14.151	0	-0.0499	-0.055	-0.045	0.002	-20.559	0	0.4429	0.306	0.58	0.07	6.349	0	0.2904	0.178	0.403	0.057	5.071	0	1.1258	1.019	1.232	0.054	20.7	0	-0.1532
Cancer of mouth	neoplasms	1.2934	-0.428	3.015	0.878	1.473	3.64516	0.651811	20.3891	10	6521	10	8343	0.14081	0.304666	not_significant	0.561716	0.851366	1.4384	1.24	1.637	0.101	14.189	0	-0.05	-0.055	-0.045	0.002	-20.593	0	0.442	0.305	0.579	0.07	6.336	0	0.2903	0.178	0.403	0.057	5.069	0	1.1257	1.019	1.232	0.054	20.696	0	-0.1541
Cancer of other endocrine glands	neoplasms	1.0918	-0.178	2.362	0.648	1.685	2.97963	0.836942	10.6122	10	6521	10	8343	0.0919404	0.225084	not_significant	0.474163	1.03649	1.4345	1.236	1.633	0.101	14.157	0	-0.0499	-0.055	-0.045	0.002	-20.573	0	0.4441	0.307	0.581	0.07	6.365	0	0.2911	0.179	0.403	0.057	5.083	0	1.1265	1.02	1.233	0.054	20.707	0	-0.1529
Cancer of other lymphoid, histiocytic tissue	neoplasms	1.8914	-0.314	4.097	1.125	1.681	6.62864	0.730519	60.1595	10	6521	10	8343	0.0927789	0.22665	not_significant	0.821425	1.03255	1.4322	1.234	1.631	0.101	14.137	0	-0.0498	-0.055	-0.045	0.002	-20.55	0	0.4434	0.307	0.58	0.07	6.356	0	0.2902	0.178	0.402	0.057	5.068	0	1.1259	1.019	1.233	0.054	20.698	0	-0.1535
Cancer of prostate	neoplasms	1.0497	0.387	1.713	0.338	3.102	2.85679	1.47256	5.54557	24	6507	18	8335	0.00191897	0.0143327	mi_significant	0.455879	2.71693	1.4545	1.255	1.654	0.102	14.314	0	-0.0505	-0.055	-0.046	0.002	-20.72	0	0.4436	0.307	0.58	0.07	6.356	0	0.2927	0.18	0.405	0.057	5.109	0	1.1256	1.019	1.232	0.054	20.687	0	-0.1514
Cancer of stomach	neoplasms	2.5036	0.223	4.784	1.164	2.152	12.2264	1.24982	119.582	10	6521	10	8343	0.0314164	0.107043	not_significant	1.0873	1.50284	1.4399	1.241	1.639	0.101	14.203	0	-0.05	-0.055	-0.045	0.002	-20.608	0	0.4429	0.306	0.58	0.07	6.349	0	0.2895	0.177	0.402	0.057	5.054	0	1.1256	1.019	1.232	0.054	20.693	0	-0.1546
Cancer of tongue	neoplasms	0.3154	-2.093	2.724	1.229	0.257	1.37081	0.123317	15.2412	10	6521	10	8343	0.797459	0.883689	not_significant	0.136976	0.0982915	1.4332	1.235	1.632	0.101	14.147	0	-0.0498	-0.055	-0.045	0.002	-20.554	0	0.4427	0.306	0.579	0.07	6.346	0	0.2902	0.178	0.402	0.057	5.068	0	1.1258	1.019	1.232	0.054	20.699	0	-0.1536
Cancer, suspected or other	neoplasms	0.5853	-0.049	1.219	0.323	1.81	1.79553	0.952181	3.3838	25	6506	21	8332	0.0703701	0.185325	not_significant	0.254193	1.15261	1.4366	1.238	1.635	0.101	14.178	0	-0.05	-0.055	-0.045	0.002	-20.593	0	0.4419	0.305	0.579	0.07	6.334	0	0.2888	0.177	0.401	0.057	5.043	0	1.1255	1.019	1.232	0.054	20.69	0	-0.1535
Candidiasis	infectious diseases	0.7042	0.076	1.333	0.321	2.196	2.02223	1.07896	3.7924	26	6505	19	8334	0.0280692	0.100614	not_significant	0.30583	1.55177	1.4361	1.238	1.635	0.101	14.176	0	-0.0499	-0.055	-0.045	0.002	-20.592	0	0.4431	0.306	0.58	0.07	6.351	0	0.2884	0.176	0.401	0.057	5.034	0	1.1245	1.018	1.231	0.054	20.672	0	-0.1552
Candidiasis of skin and nails	infectious diseases	0.2555	-0.694	1.205	0.485	0.527	1.29111	0.499574	3.33676	10	6521	10	8343	0.598017	0.755811	not_significant	0.110962	0.223287	1.433	1.234	1.632	0.101	14.146	0	-0.0498	-0.055	-0.045	0.002	-20.556	0	0.4422	0.305	0.579	0.07	6.338	0	0.2904	0.178	0.403	0.057	5.07	0	1.126	1.019	1.233	0.054	20.702	0	-0.1533
Carbuncle and furuncle	dermatologic	0.4607	-0.216	1.138	0.346	1.333	1.58518	0.805735	3.12052	17	6514	19	8334	0.182403	0.36165	not_significant	0.200079	0.738968	1.4334	1.235	1.632	0.101	14.149	0	-0.0499	-0.055	-0.045	0.002	-20.569	0	0.4441	0.307	0.581	0.07	6.364	0	0.291	0.179	0.403	0.057	5.082	0	1.127	1.02	1.234	0.054	20.716	0	-0.1533
Carcinoma in situ of skin	neoplasms	1.0434	0.269	1.818	0.395	2.641	2.83885	1.30866	6.15953	13	6518	17	8336	0.00826444	0.0412286	mi_significant	0.453143	2.08279	1.4562	1.257	1.656	0.102	14.32	0	-0.0504	-0.055	-0.046	0.002	-20.705	0	0.4401	0.303	0.577	0.07	6.308	0	0.2896	0.177	0.402	0.057	5.056	0	1.1262	1.02	1.233	0.054	20.697	0	-0.1546
Cardiac and circulatory congenital anomalies	congenital anomalies	0.0197	-1.101	1.141	0.572	0.034	1.0199	0.332538	3.1299	10	6521	10	8343	0.972562	0.988957	not_significant	0.0085556	0.0120827	1.433	1.234	1.632	0.101	14.145	0	-0.0498	-0.055	-0.045	0.002	-20.551	0	0.4427	0.306	0.579	0.07	6.346	0	0.2902	0.178	0.402	0.057	5.067	0	1.1258	1.019	1.232	0.054	20.698	0	-0.1534
Cardiac arrest	circulatory system	1.9565	0.565	3.348	0.71	2.756	7.07452	1.75945	28.4458	10	6521	10	8343	0.00584352	0.0325955	mi_significant	0.849697	2.23333	1.4433	1.244	1.642	0.101	14.23	0	-0.0501	-0.055	-0.045	0.002	-20.645	0	0.4444	0.308	0.581	0.07	6.368	0	0.2895	0.177	0.402	0.057	5.054	0	1.1267	1.02	1.233	0.054	20.709	0	-0.1532
Cardiac conduction disorders	circulatory system	1.6036	-0.124	3.332	0.882	1.819	4.9709	0.88338	27.9943	10	6521	10	8343	0.0689321	0.182654	not_significant	0.696435	1.16158	1.4347	1.236	1.633	0.101	14.159	0	-0.0499	-0.055	-0.045	0.002	-20.565	0	0.4428	0.306	0.58	0.07	6.347	0	0.2902	0.178	0.402	0.057	5.068	0	1.1259	1.019	1.233	0.054	20.7	0	-0.1554
Cardiac congenital anomalies	congenital anomalies	0.588	-0.368	1.544	0.488	1.206	1.80038	0.692117	4.68329	10	6521	10	8343	0.227953	0.415169	not_significant	0.255365	0.642154	1.4349	1.236	1.633	0.101	14.162	0	-0.0499	-0.055	-0.045	0.002	-20.575	0	0.444	0.307	0.581	0.07	6.363	0	0.2901	0.178	0.402	0.057	5.066	0	1.1272	1.021	1.234	0.054	20.717	0	-0.1529
Cardiac pacemaker in situ	circulatory system	1.6228	0.32	2.925	0.665	2.442	5.06726	1.37713	18.6342	10	6521	10	8343	0.0146075	0.0624954	not_significant	0.704773	1.83543	1.4475	1.248	1.646	0.102	14.258	0	-0.0502	-0.055	-0.045	0.002	-20.659	0	0.4432	0.306	0.58	0.07	6.352	0	0.2899	0.178	0.402	0.057	5.06	0	1.1268	1.02	1.233	0.054	20.713	0	-0.1522
Cardiac pacemaker/device in situ	circulatory system	-0.1169	-1.866	1.632	0.892	-0.131	0.889674	0.154741	5.11409	10	6521	10	8343	0.895822	0.945153	not_significant	-0.050769	0.0477782	1.4328	1.234	1.631	0.101	14.142	0	-0.0498	-0.055	-0.045	0.002	-20.545	0	0.4427	0.306	0.579	0.07	6.345	0	0.2903	0.178	0.403	0.057	5.069	0	1.1258	1.019	1.232	0.054	20.698	0	-0.1534
Cardiac shunt/ heart septal defect	congenital anomalies	0.4896	-0.441	1.42	0.475	1.031	1.63166	0.643393	4.13712	11	6520	10	8343	0.302526	0.505613	not_significant	0.212631	0.519237	1.4342	1.236	1.633	0.101	14.156	0	-0.0499	-0.055	-0.045	0.002	-20.567	0	0.4427	0.306	0.579	0.07	6.345	0	0.2901	0.178	0.402	0.057	5.066	0	1.1257	1.019	1.232	0.054	20.696	0	-0.1533
Cardiogenic shock	symptoms	1.2943	-0.357	2.945	0.842	1.536	3.64844	0.699772	19.0107	10	6521	10	8343	0.12444	0.279779	not_significant	0.562107	0.905039	1.4378	1.239	1.637	0.101	14.185	0	-0.05	-0.055	-0.045	0.002	-20.592	0	0.4434	0.307	0.58	0.07	6.355	0	0.2898	0.178	0.402	0.057	5.061	0	1.1266	1.02	1.233	0.054	20.71	0	-0.1534
Cardiomegaly	circulatory system	0.5983	0.195	1.001	0.206	2.909	1.81902	1.21531	2.721	49	6482	55	8298	0.0036285	0.0228423	mi_significant	0.259838	2.44027	1.4395	1.241	1.638	0.101	14.203	0	-0.0502	-0.055	-0.045	0.002	-20.667	0	0.4478	0.311	0.585	0.07	6.415	0	0.2934	0.181	0.406	0.057	5.121	0	1.1328	1.026	1.24	0.054	20.799	0	-0.1503
Cataract	sense organs	0.9397	0.45	1.429	0.25	3.764	2.55921	1.56831	4.17452	35	6496	39	8314	0.000166891	0.00229822	mi_significant	0.408107	3.77757	1.4754	1.276	1.675	0.102	14.469	0	-0.051	-0.056	-0.046	0.002	-20.849	0	0.4381	0.301	0.575	0.07	6.278	0	0.2886	0.176	0.401	0.057	5.037	0	1.1273	1.021	1.234	0.054	20.714	0	-0.1535
Celiac disease	digestive	-0.2053	-1.085	0.674	0.449	-0.457	0.814403	0.337902	1.96207	10	6521	15	8338	0.647362	0.783879	not_significant	-0.0891607	0.188853	1.4336	1.235	1.632	0.101	14.151	0	-0.0498	-0.055	-0.045	0.002	-20.555	0	0.4427	0.306	0.579	0.07	6.347	0	0.2899	0.178	0.402	0.057	5.062	0	1.1255	1.019	1.232	0.054	20.69	0	-0.1534
Cellulitis and abscess of arm/hand	dermatologic	-0.026	-0.582	0.53	0.284	-0.092	0.974335	0.55878	1.69893	21	6510	39	8314	0.927018	0.966012	not_significant	-0.0112917	0.0329117	1.4329	1.234	1.631	0.101	14.144	0	-0.0498	-0.055	-0.045	0.002	-20.544	0	0.4427	0.306	0.579	0.07	6.345	0	0.2902	0.178	0.402	0.057	5.066	0	1.1257	1.019	1.232	0.054	20.695	0	-0.1534
Cellulitis and abscess of face/neck	dermatologic	-0.2514	-0.884	0.382	0.323	-0.778	0.777711	0.413127	1.46521	16	6515	30	8323	0.43633	0.640681	not_significant	-0.109182	0.360185	1.4334	1.235	1.632	0.101	14.148	0	-0.0498	-0.055	-0.045	0.002	-20.545	0	0.442	0.305	0.579	0.07	6.336	0	0.2903	0.178	0.403	0.057	5.069	0	1.1254	1.019	1.232	0.054	20.691	0	-0.1536
Cellulitis and abscess of fingers/toes	dermatologic	0.2032	-0.185	0.591	0.198	1.026	1.22532	0.831104	1.80579	48	6483	65	8288	0.304963	0.507759	not_significant	0.0882486	0.515753	1.4322	1.234	1.631	0.101	14.137	0	-0.0499	-0.055	-0.045	0.002	-20.564	0	0.4443	0.308	0.581	0.07	6.368	0	0.2906	0.178	0.403	0.057	5.075	0	1.1273	1.021	1.234	0.054	20.718	0	-0.1534
Cellulitis and abscess of foot, toe	dermatologic	0.4042	-0.651	1.459	0.538	0.751	1.4981	0.521524	4.30166	10	6521	10	8343	0.452667	0.653841	not_significant	0.175542	0.344221	1.4339	1.235	1.632	0.101	14.153	0	-0.0499	-0.055	-0.045	0.002	-20.562	0	0.443	0.306	0.58	0.07	6.35	0	0.2905	0.178	0.403	0.057	5.073	0	1.1265	1.02	1.233	0.054	20.708	0	-0.1535
Cellulitis and abscess of leg, except foot	dermatologic	0.4294	0.03	0.829	0.204	2.108	1.53634	1.03045	2.29103	48	6483	58	8295	0.0350698	0.115673	not_significant	0.186486	1.45507	1.4362	1.238	1.635	0.101	14.175	0	-0.05	-0.055	-0.045	0.002	-20.61	0	0.4446	0.308	0.581	0.07	6.372	0	0.291	0.179	0.403	0.057	5.08	0	1.1284	1.022	1.235	0.054	20.737	0	-0.154
Cellulitis and abscess of oral soft tissues	digestive	0.2671	-0.951	1.485	0.621	0.43	1.30617	0.386354	4.41497	10	6521	10	8343	0.667345	0.797677	not_significant	0.116	0.17565	1.4325	1.234	1.631	0.101	14.14	0	-0.0498	-0.055	-0.045	0.002	-20.551	0	0.4431	0.306	0.58	0.07	6.352	0	0.2905	0.178	0.403	0.057	5.073	0	1.1262	1.02	1.233	0.054	20.703	0	-0.1532
Cellulitis and abscess of trunk	dermatologic	0.3435	-0.205	0.892	0.28	1.228	1.40987	0.814647	2.44	26	6505	30	8323	0.219438	0.406299	not_significant	0.14918	0.658688	1.432	1.233	1.631	0.101	14.137	0	-0.0499	-0.055	-0.045	0.002	-20.562	0	0.4437	0.307	0.58	0.07	6.359	0	0.2902	0.178	0.402	0.057	5.067	0	1.1272	1.021	1.234	0.054	20.719	0	-0.1533
Central/nonobstroctive sleep apnea	neurological	0.6732	0.067	1.28	0.31	2.175	1.9605	1.0693	3.59664	22	6509	22	8331	0.0296188	0.103314	not_significant	0.292367	1.52843	1.4359	1.237	1.635	0.101	14.172	0	-0.05	-0.055	-0.045	0.002	-20.596	0	0.4436	0.307	0.58	0.07	6.358	0	0.2908	0.179	0.403	0.057	5.077	0	1.1276	1.021	1.234	0.054	20.725	0	-0.1545
Cerebral aneurysm	circulatory system	0.5107	-1.025	2.046	0.783	0.652	1.66646	0.358796	7.73689	10	6521	10	8343	0.514464	0.701669	not_significant	0.221794	0.288645	1.4333	1.235	1.632	0.101	14.148	0	-0.0499	-0.055	-0.045	0.002	-20.558	0	0.4427	0.306	0.579	0.07	6.346	0	0.2906	0.178	0.403	0.057	5.075	0	1.1258	1.019	1.232	0.054	20.699	0	-0.1531
Cerebral artery occlusion, with cerebral infarction	circulatory system	0.1981	-0.583	0.979	0.399	0.497	1.21908	0.558221	2.66179	12	6519	17	8336	0.619157	0.771466	not_significant	0.0860337	0.208199	1.4337	1.235	1.632	0.101	14.15	0	-0.0499	-0.055	-0.045	0.002	-20.557	0	0.4432	0.306	0.58	0.07	6.352	0	0.2906	0.178	0.403	0.057	5.073	0	1.1261	1.02	1.233	0.054	20.703	0	-0.1531
Cerebral cysts	neurological	-0.9185	-3.247	1.41	1.188	-0.773	0.399117	0.0388907	4.09596	10	6521	10	8343	0.439349	0.643923	not_significant	-0.398899	0.357191	1.4334	1.235	1.632	0.101	14.149	0	-0.0498	-0.055	-0.045	0.002	-20.556	0	0.4435	0.307	0.58	0.07	6.356	0	0.2909	0.179	0.403	0.057	5.079	0	1.1259	1.019	1.232	0.054	20.7	0	-0.1532
Cerebral degeneration, unspecified	neurological	1.8042	0.005	3.603	0.918	1.966	6.07511	1.00501	36.7082	10	6521	10	8343	0.0493415	0.144954	not_significant	0.783554	1.30679	1.4394	1.241	1.638	0.101	14.199	0	-0.05	-0.055	-0.045	0.002	-20.613	0	0.4405	0.304	0.577	0.07	6.312	0	0.291	0.179	0.403	0.057	5.081	0	1.1275	1.021	1.234	0.054	20.723	0	-0.1518
Cerebral edema and compression of brain	neurological	0.6965	-0.146	1.539	0.43	1.62	2.00672	0.864158	4.65993	16	6515	10	8343	0.105311	0.245975	not_significant	0.302486	0.977525	1.4328	1.234	1.631	0.101	14.143	0	-0.0498	-0.055	-0.045	0.002	-20.555	0	0.4419	0.305	0.579	0.07	6.334	0	0.2888	0.177	0.401	0.057	5.043	0	1.1253	1.019	1.232	0.054	20.687	0	-0.1538
Cerebral ischemia	circulatory system	0.9046	-0.327	2.136	0.628	1.44	2.47094	0.721084	8.46551	10	6521	10	8343	0.149885	0.319079	not_significant	0.392863	0.824241	1.435	1.236	1.634	0.101	14.163	0	-0.0499	-0.055	-0.045	0.002	-20.575	0	0.4428	0.306	0.58	0.07	6.348	0	0.2902	0.178	0.403	0.057	5.068	0	1.1264	1.02	1.233	0.054	20.707	0	-0.1535
Cerebrovascular disease	circulatory system	-0.5218	-2.918	1.875	1.223	-0.427	0.593451	0.0540417	6.52082	10	6521	10	8343	0.669544	0.798347	not_significant	-0.226615	0.174221	1.4326	1.234	1.631	0.101	14.14	0	-0.0498	-0.055	-0.045	0.002	-20.543	0	0.4426	0.306	0.579	0.07	6.345	0	0.29	0.178	0.402	0.057	5.064	0	1.1258	1.019	1.232	0.054	20.698	0	-0.1535
Certain early complications of trauma or procedure	injuries & poisonings	1.2794	-0.65	3.209	0.984	1.3	3.59448	0.522046	24.7543	10	6521	10	8343	0.193652	0.37871	not_significant	0.555636	0.712977	1.433	1.234	1.632	0.101	14.148	0	-0.0498	-0.055	-0.045	0.002	-20.557	0	0.4427	0.306	0.579	0.07	6.346	0	0.2902	0.178	0.402	0.057	5.068	0	1.1258	1.019	1.232	0.054	20.699	0	-0.1547
Cervical radiculitis	symptoms	-0.0945	-0.38	0.191	0.146	-0.649	0.909828	0.683861	1.21046	80	6451	143	8210	0.516552	0.702553	not_significant	-0.0410408	0.286886	1.4317	1.233	1.63	0.101	14.131	0	-0.0498	-0.055	-0.045	0.002	-20.506	0	0.4421	0.305	0.579	0.07	6.337	0	0.2903	0.178	0.403	0.057	5.069	0	1.1253	1.019	1.232	0.054	20.687	0	-0.1531
Cervicalgia	symptoms	0.3527	0.162	0.543	0.097	3.626	1.4229	1.17586	1.72116	223	6308	251	8102	0.000288331	0.00346521	mi_significant	0.153176	3.54011	1.4341	1.235	1.633	0.101	14.149	0	-0.0502	-0.055	-0.045	0.002	-20.668	0	0.4475	0.311	0.584	0.07	6.41	0	0.2925	0.18	0.405	0.057	5.105	0	1.1328	1.026	1.24	0.054	20.802	0	-0.1539
Changes in skin texture	dermatologic	0.2171	-0.6	1.034	0.417	0.521	1.24247	0.548812	2.81229	11	6520	16	8337	0.602648	0.758041	not_significant	0.0942853	0.219936	1.4339	1.235	1.632	0.101	14.153	0	-0.0499	-0.055	-0.045	0.002	-20.559	0	0.443	0.306	0.58	0.07	6.35	0	0.2902	0.178	0.402	0.057	5.068	0	1.126	1.019	1.233	0.054	20.701	0	-0.1534
Chemotherapy	neoplasms	0.7291	0.244	1.214	0.247	2.948	2.07321	1.27634	3.36693	46	6485	32	8321	0.00320048	0.0210499	mi_significant	0.316644	2.49478	1.4369	1.238	1.635	0.101	14.18	0	-0.05	-0.055	-0.045	0.002	-20.61	0	0.4406	0.304	0.577	0.07	6.315	0	0.2889	0.177	0.401	0.057	5.043	0	1.1249	1.018	1.232	0.054	20.677	0	-0.1546
Cholecystitis without cholelithiasis	digestive	-0.3613	-1.32	0.597	0.489	-0.739	0.69677	0.267135	1.81666	10	6521	13	8340	0.45988	0.659441	not_significant	-0.156911	0.337355	1.4337	1.235	1.632	0.101	14.152	0	-0.0498	-0.055	-0.045	0.002	-20.554	0	0.4422	0.305	0.579	0.07	6.339	0	0.2907	0.178	0.403	0.057	5.075	0	1.1257	1.019	1.232	0.054	20.696	0	-0.1535
Cholelithiasis	digestive	0.0771	-0.41	0.565	0.249	0.31	1.08015	0.66365	1.75945	32	6499	41	8312	0.756505	0.859114	not_significant	0.0334841	0.121188	1.4326	1.234	1.631	0.101	14.141	0	-0.0498	-0.055	-0.045	0.002	-20.554	0	0.4428	0.306	0.579	0.07	6.347	0	0.2901	0.178	0.402	0.057	5.066	0	1.1261	1.019	1.233	0.054	20.701	0	-0.1532
Cholelithiasis with acute cholecystitis	digestive	-0.7105	-2.053	0.632	0.685	-1.037	0.491398	0.128349	1.88137	10	6521	10	8343	0.299777	0.503564	not_significant	-0.308566	0.523202	1.4336	1.235	1.632	0.101	14.15	0	-0.0498	-0.055	-0.045	0.002	-20.549	0	0.4425	0.306	0.579	0.07	6.344	0	0.2902	0.178	0.402	0.057	5.067	0	1.1253	1.019	1.232	0.054	20.689	0	-0.1537
Cholelithiasis with other cholecystitis	digestive	0.2008	-0.853	1.255	0.538	0.373	1.22238	0.426135	3.50784	10	6521	10	8343	0.708933	0.833076	not_significant	0.0872063	0.149395	1.4327	1.234	1.631	0.101	14.143	0	-0.0498	-0.055	-0.045	0.002	-20.551	0	0.4426	0.306	0.579	0.07	6.344	0	0.29	0.178	0.402	0.057	5.063	0	1.1259	1.019	1.233	0.054	20.701	0	-0.1534
Cholesterolosis of gallbladder	digestive	0.6796	-0.057	1.416	0.376	1.81	1.97309	0.944594	4.12061	18	6513	14	8339	0.0703732	0.185325	not_significant	0.295147	1.15259	1.4347	1.236	1.633	0.101	14.159	0	-0.0499	-0.055	-0.045	0.002	-20.577	0	0.4409	0.304	0.578	0.07	6.319	0	0.2902	0.178	0.402	0.057	5.067	0	1.1261	1.02	1.233	0.054	20.703	0	-0.1534
Chondrocalcinosis	endocrine/metabolic	1.1109	0.118	2.104	0.507	2.193	3.03709	1.12524	8.1989	10	6521	10	8343	0.0283346	0.100966	not_significant	0.482458	1.54768	1.4412	1.242	1.64	0.101	14.211	0	-0.0501	-0.055	-0.045	0.002	-20.632	0	0.445	0.308	0.582	0.07	6.378	0	0.2918	0.18	0.404	0.057	5.094	0	1.1284	1.022	1.235	0.054	20.736	0	-0.1511
Chondromalacia		0.595	-0.611	1.801	0.615	0.967	1.81303	0.542808	6.0557	10	6521	10	8343	0.333495	0.540404	not_significant	0.258405	0.476911	1.4335	1.235	1.632	0.101	14.151	0	-0.0498	-0.055	-0.045	0.002	-20.557	0	0.4423	0.306	0.579	0.07	6.34	0	0.289	0.177	0.401	0.057	5.046	0	1.1254	1.019	1.232	0.054	20.69	0	-0.1537
Chorioretinal inflammations, scars, and other disorders of choroid	sense organs	0.6871	-2.085	3.46	1.415	0.486	1.98794	0.124307	31.817	10	6521	10	8343	0.627172	0.776333	not_significant	0.298404	0.202613	1.4329	1.234	1.631	0.101	14.144	0	-0.0498	-0.055	-0.045	0.002	-20.553	0	0.443	0.306	0.58	0.07	6.35	0	0.2905	0.178	0.403	0.057	5.072	0	1.1261	1.02	1.233	0.054	20.703	0	-0.1533
Chorioretinal scars	sense organs	0.1248	-1.081	1.33	0.615	0.203	1.13292	0.339256	3.78104	10	6521	10	8343	0.839265	0.913927	not_significant	0.0542	0.0761011	1.4331	1.235	1.632	0.101	14.147	0	-0.0498	-0.055	-0.045	0.002	-20.553	0	0.4428	0.306	0.58	0.07	6.347	0	0.2904	0.178	0.403	0.057	5.07	0	1.1259	1.019	1.233	0.054	20.7	0	-0.1532
Choroidal degenerations	sense organs	0.8387	-1.934	3.611	1.415	0.593	2.31336	0.144569	37.003	10	6521	10	8343	0.553291	0.723492	not_significant	0.364243	0.257046	1.4332	1.235	1.632	0.101	14.147	0	-0.0498	-0.055	-0.045	0.002	-20.554	0	0.4427	0.306	0.579	0.07	6.346	0	0.2902	0.178	0.402	0.057	5.068	0	1.1258	1.019	1.232	0.054	20.699	0	-0.1537
Chromosomal anomalies	congenital anomalies	3.0885	1.06	5.117	1.035	2.983	21.9441	2.88637	166.834	17	6514	10	8343	0.00284973	0.0194193	mi_significant	1.34132	2.5452	1.428	1.229	1.627	0.101	14.091	0	-0.0497	-0.054	-0.045	0.002	-20.491	0	0.4411	0.304	0.578	0.07	6.323	0	0.2854	0.173	0.398	0.057	4.98	0	1.1242	1.018	1.231	0.054	20.67	0	-0.1577
Chromosomal anomalies and genetic disorders	congenital anomalies	0.5137	-2.26	3.287	1.415	0.363	1.67146	0.10435	26.7625	10	6521	10	8343	0.716607	0.836147	not_significant	0.223097	0.144719	1.433	1.234	1.632	0.101	14.146	0	-0.0498	-0.055	-0.045	0.002	-20.554	0	0.4425	0.306	0.579	0.07	6.343	0	0.2904	0.178	0.403	0.057	5.071	0	1.1261	1.019	1.233	0.054	20.702	0	-0.1532
Chronic airway obstruction	respiratory	0.5797	-0.151	1.31	0.373	1.556	1.7855	0.859848	3.70617	14	6517	18	8335	0.119815	0.272627	not_significant	0.251761	0.921487	1.4373	1.239	1.636	0.101	14.184	0	-0.05	-0.055	-0.045	0.002	-20.598	0	0.4427	0.306	0.579	0.07	6.346	0	0.2913	0.179	0.404	0.057	5.085	0	1.1268	1.02	1.233	0.054	20.715	0	-0.1541
Chronic bronchitis	respiratory	0.6968	-0.456	1.849	0.588	1.185	2.00732	0.633814	6.35346	10	6521	10	8343	0.235984	0.422152	not_significant	0.302616	0.627118	1.436	1.237	1.635	0.101	14.17	0	-0.0499	-0.055	-0.045	0.002	-20.58	0	0.4426	0.306	0.579	0.07	6.344	0	0.2909	0.179	0.403	0.057	5.08	0	1.126	1.019	1.233	0.054	20.701	0	-0.1532
Chronic dermatitis due to solar radiation	dermatologic	-0.0651	-0.338	0.208	0.139	-0.467	0.936974	0.713195	1.23121	85	6446	162	8191	0.640188	0.782551	not_significant	-0.0282726	0.193693	1.4311	1.232	1.63	0.101	14.116	0	-0.0498	-0.055	-0.045	0.002	-20.477	0	0.4423	0.306	0.579	0.07	6.34	0	0.2919	0.179	0.404	0.057	5.087	0	1.1248	1.018	1.231	0.054	20.664	0	-0.1537
Chronic fatigue syndrome	symptoms	0.369	-0.08	0.818	0.229	1.612	1.44629	0.923116	2.26596	39	6492	45	8308	0.107036	0.249122	not_significant	0.160255	0.970472	1.4316	1.233	1.63	0.101	14.131	0	-0.0499	-0.055	-0.045	0.002	-20.582	0	0.4463	0.309	0.583	0.07	6.393	0	0.2941	0.182	0.406	0.057	5.131	0	1.1298	1.023	1.237	0.054	20.746	0	-0.1503
Chronic inflammatory disorders of orbit	sense organs	0.3934	-2.416	3.203	1.433	0.274	1.48201	0.089278	24.6062	10	6521	10	8343	0.78372	0.874702	not_significant	0.170851	0.105839	1.4332	1.235	1.632	0.101	14.147	0	-0.0498	-0.055	-0.045	0.002	-20.554	0	0.4424	0.306	0.579	0.07	6.341	0	0.2901	0.178	0.402	0.057	5.065	0	1.1258	1.019	1.232	0.054	20.699	0	-0.1534
Chronic kidney disease, Stage I or II	genitourinary	1.4325	0.833	2.032	0.306	4.683	4.18916	2.30021	7.62933	40	6491	18	8335	2.83023e-06	9.59376e-05	mi_significant	0.622127	5.54818	1.4479	1.249	1.647	0.101	14.273	0	-0.0504	-0.055	-0.046	0.002	-20.729	0	0.4443	0.308	0.581	0.07	6.366	0	0.2932	0.181	0.406	0.057	5.116	0	1.128	1.021	1.235	0.054	20.722	0	-0.1532
Chronic Kidney Disease, Stage III	genitourinary	1.5394	0.776	2.303	0.389	3.952	4.66179	2.17276	10.0041	27	6504	11	8342	7.74339e-05	0.00129773	mi_significant	0.668553	4.11107	1.4532	1.254	1.652	0.101	14.319	0	-0.0504	-0.055	-0.046	0.002	-20.739	0	0.4438	0.307	0.581	0.07	6.36	0	0.2891	0.177	0.401	0.057	5.046	0	1.1241	1.017	1.231	0.054	20.655	0	-0.1532
Chronic Kidney Disease, Stage IV	genitourinary	1.8149	0.745	2.885	0.546	3.324	6.14046	2.10644	17.9036	17	6514	10	8343	0.000888142	0.00821066	mi_significant	0.788201	3.05152	1.4411	1.242	1.64	0.101	14.214	0	-0.0501	-0.055	-0.045	0.002	-20.626	0	0.4436	0.307	0.58	0.07	6.358	0	0.2873	0.175	0.4	0.057	5.016	0	1.1247	1.018	1.231	0.054	20.673	0	-0.1555
Chronic laryngitis	respiratory	1.3338	-0.507	3.175	0.939	1.42	3.79544	0.6023	23.9268	10	6521	10	8343	0.155534	0.327937	not_significant	0.579262	0.808174	1.4346	1.236	1.633	0.101	14.162	0	-0.0499	-0.055	-0.045	0.002	-20.57	0	0.4428	0.306	0.579	0.07	6.347	0	0.2898	0.178	0.402	0.057	5.061	0	1.1259	1.019	1.233	0.054	20.7	0	-0.1545
Chronic lymphocytic thyroiditis	endocrine/metabolic	0.696	-0.047	1.439	0.379	1.836	2.00571	0.954087	4.21648	17	6514	13	8340	0.0663445	0.178267	not_significant	0.302269	1.1782	1.4323	1.234	1.631	0.101	14.138	0	-0.0498	-0.055	-0.045	0.002	-20.559	0	0.4426	0.306	0.579	0.07	6.344	0	0.291	0.179	0.403	0.057	5.081	0	1.1263	1.02	1.233	0.054	20.706	0	-0.1543
Chronic osteomyelitis	musculoskeletal	2.0741	0.717	3.431	0.693	2.995	7.95738	2.04828	30.9075	10	6521	10	8343	0.00274426	0.0190943	mi_significant	0.90077	2.56157	1.443	1.244	1.642	0.101	14.228	0	-0.0501	-0.055	-0.045	0.002	-20.637	0	0.4428	0.306	0.58	0.07	6.345	0	0.2896	0.177	0.402	0.057	5.056	0	1.126	1.019	1.233	0.054	20.695	0	-0.1548
Chronic pain	neurological	0.1503	0.027	0.274	0.063	2.386	1.16218	1.02737	1.31521	521	6010	717	7636	0.0170315	0.070804	not_significant	0.0652745	1.76875	1.4336	1.235	1.632	0.101	14.147	0	-0.0503	-0.055	-0.045	0.002	-20.658	0	0.4516	0.315	0.589	0.07	6.463	0	0.2953	0.183	0.408	0.057	5.152	0	1.1337	1.027	1.241	0.055	20.798	0	-0.1528
Chronic pain syndrome	neurological	0.4758	-0.202	1.153	0.346	1.377	1.6093	0.817095	3.16768	19	6512	20	8333	0.168648	0.343533	not_significant	0.206637	0.773019	1.4341	1.235	1.633	0.101	14.154	0	-0.0499	-0.055	-0.045	0.002	-20.578	0	0.4446	0.308	0.581	0.07	6.372	0	0.2911	0.179	0.403	0.057	5.083	0	1.1274	1.021	1.234	0.054	20.721	0	-0.152
Chronic pancreatitis	digestive	1.3496	-0.105	2.804	0.742	1.819	3.85588	0.900325	16.5106	10	6521	10	8343	0.0689272	0.182654	not_significant	0.586124	1.16161	1.4355	1.237	1.634	0.101	14.167	0	-0.0499	-0.055	-0.045	0.002	-20.582	0	0.4429	0.306	0.58	0.07	6.347	0	0.29	0.178	0.402	0.057	5.063	0	1.1267	1.02	1.233	0.054	20.711	0	-0.1528
Chronic pericarditis	circulatory system	1.1363	-1.357	3.629	1.272	0.893	3.11522	0.257432	37.6751	10	6521	10	8343	0.371635	0.578468	not_significant	0.493489	0.429883	1.4326	1.234	1.631	0.101	14.142	0	-0.0498	-0.055	-0.045	0.002	-20.548	0	0.442	0.305	0.579	0.07	6.335	0	0.2902	0.178	0.402	0.057	5.068	0	1.1258	1.019	1.232	0.054	20.699	0	-0.1539
Chronic pharyngitis and nasopharyngitis	respiratory	0.5894	0.298	0.88	0.148	3.969	1.80291	1.34716	2.4109	111	6420	92	8261	7.21554e-05	0.00125512	mi_significant	0.255973	4.14173	1.436	1.237	1.635	0.101	14.168	0	-0.05	-0.055	-0.045	0.002	-20.597	0	0.4369	0.3	0.574	0.07	6.26	0	0.2865	0.174	0.399	0.057	5	0	1.122	1.015	1.229	0.054	20.621	0	-0.164
Chronic prostatitis	genitourinary	1.2304	0.351	2.109	0.448	2.744	3.4226	1.42049	8.24	15	6516	10	8343	0.00607718	0.0337565	mi_significant	0.534356	2.2163	1.4344	1.236	1.633	0.101	14.155	0	-0.0499	-0.055	-0.045	0.002	-20.574	0	0.4425	0.306	0.579	0.07	6.342	0	0.2894	0.177	0.402	0.057	5.052	0	1.1272	1.021	1.234	0.054	20.72	0	-0.1552
Chronic pulmonary heart disease	circulatory system	0.9441	0.066	1.823	0.448	2.106	2.5705	1.06823	6.1904	14	6517	10	8343	0.0351743	0.115673	not_significant	0.410017	1.45377	1.4348	1.236	1.633	0.101	14.163	0	-0.0499	-0.055	-0.045	0.002	-20.587	0	0.4432	0.306	0.58	0.07	6.352	0	0.2904	0.178	0.403	0.057	5.071	0	1.1272	1.021	1.234	0.054	20.719	0	-0.1534
Chronic renal failure [CKD]	genitourinary	1.2574	0.737	1.777	0.265	4.74	3.51627	2.08966	5.91209	51	6480	24	8329	2.13251e-06	8.24132e-05	mi_significant	0.546082	5.67111	1.4573	1.258	1.656	0.102	14.348	0	-0.0506	-0.055	-0.046	0.002	-20.772	0	0.439	0.302	0.576	0.07	6.287	0	0.2846	0.172	0.397	0.057	4.964	0	1.1233	1.017	1.23	0.054	20.639	0	-0.1531
Chronic sinusitis	respiratory	0.3347	0.103	0.567	0.118	2.827	1.39752	1.10849	1.76297	151	6380	165	8188	0.00470464	0.0272786	mi_significant	0.145358	2.32747	1.4295	1.231	1.628	0.101	14.11	0	-0.0499	-0.055	-0.045	0.002	-20.588	0	0.4452	0.308	0.582	0.07	6.38	0	0.2892	0.177	0.401	0.057	5.049	0	1.129	1.022	1.236	0.054	20.747	0	-0.1556
Chronic tonsillitis and adenoiditis	respiratory	0.2368	-0.299	0.773	0.273	0.866	1.26719	0.741559	2.16626	26	6505	32	8321	0.386278	0.591936	not_significant	0.102841	0.4131	1.431	1.232	1.63	0.101	14.122	0	-0.0498	-0.055	-0.045	0.002	-20.547	0	0.4441	0.307	0.581	0.07	6.364	0	0.2911	0.179	0.403	0.057	5.082	0	1.1271	1.02	1.234	0.054	20.714	0	-0.1532
Chronic ulcer of leg or foot	dermatologic	1.157	0.323	1.991	0.425	2.72	3.18038	1.38127	7.32285	16	6515	10	8343	0.0065187	0.0353143	mi_significant	0.502479	2.18584	1.4375	1.239	1.636	0.101	14.185	0	-0.05	-0.055	-0.045	0.002	-20.615	0	0.4403	0.304	0.577	0.07	6.308	0	0.2906	0.178	0.403	0.057	5.074	0	1.1284	1.022	1.235	0.054	20.738	0	-0.1525
Chronic ulcer of unspecified site	dermatologic	0.9593	0.067	1.852	0.455	2.107	2.60987	1.0693	6.37255	16	6515	10	8343	0.0351414	0.115673	not_significant	0.416619	1.45418	1.4341	1.236	1.633	0.101	14.158	0	-0.0499	-0.055	-0.045	0.002	-20.585	0	0.4439	0.307	0.581	0.07	6.362	0	0.2909	0.179	0.403	0.057	5.079	0	1.1256	1.019	1.232	0.054	20.691	0	-0.1528
Chronic venous hypertension	circulatory system	0.6608	-0.685	2.006	0.686	0.963	1.93634	0.50409	7.43352	10	6521	10	8343	0.335719	0.541353	not_significant	0.286982	0.474024	1.4342	1.236	1.633	0.101	14.156	0	-0.0499	-0.055	-0.045	0.002	-20.567	0	0.4432	0.307	0.58	0.07	6.353	0	0.2903	0.178	0.403	0.057	5.069	0	1.1264	1.02	1.233	0.054	20.708	0	-0.1536
Chronic venous insufficiency [CVI]	circulatory system	1.1382	0.587	1.689	0.281	4.047	3.12115	1.79858	5.41406	38	6493	22	8331	5.18336e-05	0.000951722	mi_significant	0.494314	4.28539	1.4426	1.244	1.641	0.101	14.224	0	-0.0502	-0.055	-0.045	0.002	-20.675	0	0.445	0.308	0.582	0.07	6.375	0	0.2921	0.18	0.404	0.057	5.097	0	1.1282	1.021	1.235	0.054	20.729	0	-0.1536
Circadian rhythm sleep disorder	neurological	-0.3898	-1.026	0.247	0.325	-1.2	0.677192	0.358438	1.28018	16	6515	31	8322	0.230119	0.417309	not_significant	-0.169288	0.638047	1.4331	1.235	1.632	0.101	14.146	0	-0.0498	-0.055	-0.045	0.002	-20.547	0	0.4427	0.306	0.579	0.07	6.346	0	0.2908	0.179	0.403	0.057	5.078	0	1.1265	1.02	1.233	0.054	20.71	0	-0.1524
Circulatory disease NEC	circulatory system	1.3084	0.936	1.68	0.19	6.894	3.70025	2.54976	5.36556	90	6441	46	8307	5.40777e-12	1.42981e-09	mi_significant	0.568231	11.267	1.4525	1.254	1.651	0.102	14.306	0	-0.0506	-0.055	-0.046	0.002	-20.821	0	0.4453	0.308	0.582	0.07	6.373	0	0.2878	0.175	0.4	0.057	5.016	0	1.1342	1.027	1.241	0.054	20.824	0	-0.1566
Circumscribed scleroderma	dermatologic	2.6909	0.54	4.842	1.098	2.452	14.7449	1.71601	126.723	10	6521	10	8343	0.0142175	0.0614234	not_significant	1.16864	1.84718	1.4391	1.24	1.638	0.101	14.196	0	-0.05	-0.055	-0.045	0.002	-20.6	0	0.441	0.304	0.578	0.07	6.321	0	0.2887	0.176	0.401	0.057	5.04	0	1.1261	1.02	1.233	0.054	20.703	0	-0.1552
Cirrhosis of liver without mention of alcohol	digestive	0.5436	-0.381	1.468	0.472	1.152	1.7222	0.683178	4.34055	10	6521	10	8343	0.249182	0.440398	not_significant	0.236082	0.603484	1.4347	1.236	1.633	0.101	14.16	0	-0.0499	-0.055	-0.045	0.002	-20.572	0	0.4419	0.305	0.579	0.07	6.334	0	0.2897	0.177	0.402	0.057	5.058	0	1.1262	1.02	1.233	0.054	20.705	0	-0.1527
Cleft palate	congenital anomalies	0.1738	-2.817	3.165	1.526	0.114	1.18982	0.059785	23.6887	10	6521	10	8343	0.909319	0.952551	not_significant	0.0754804	0.0412836	1.433	1.234	1.632	0.101	14.146	0	-0.0498	-0.055	-0.045	0.002	-20.553	0	0.4427	0.306	0.579	0.07	6.346	0	0.2902	0.178	0.402	0.057	5.068	0	1.1258	1.019	1.232	0.054	20.698	0	-0.1534
Coccidioidomycosis	infectious diseases	1.6742	-0.656	4.004	1.189	1.408	5.33453	0.518923	54.817	10	6521	10	8343	0.159013	0.332093	not_significant	0.727096	0.798568	1.4318	1.233	1.63	0.101	14.133	0	-0.0498	-0.055	-0.045	0.002	-20.538	0	0.4427	0.306	0.579	0.07	6.346	0	0.2902	0.178	0.402	0.057	5.067	0	1.1258	1.019	1.232	0.054	20.699	0	-0.1548
Colon cancer	neoplasms	0.0113	-0.825	0.848	0.427	0.026	1.01136	0.438235	2.33497	10	6521	16	8337	0.97892	0.990307	not_significant	0.00490753	0.00925271	1.433	1.234	1.632	0.101	14.142	0	-0.0498	-0.055	-0.045	0.002	-20.544	0	0.4427	0.306	0.579	0.07	6.346	0	0.2902	0.178	0.402	0.057	5.067	0	1.1258	1.019	1.232	0.054	20.698	0	-0.1534
Color vision deficiencies	sense organs	-0.6789	-3.314	1.956	1.344	-0.505	0.507175	0.0363704	7.07099	10	6521	10	8343	0.613573	0.765953	not_significant	-0.294843	0.212133	1.4335	1.235	1.632	0.101	14.15	0	-0.0498	-0.055	-0.045	0.002	-20.553	0	0.4423	0.306	0.579	0.07	6.34	0	0.2898	0.178	0.402	0.057	5.06	0	1.1256	1.019	1.232	0.054	20.694	0	-0.1538
Coma	neurological	0.255	-0.585	1.095	0.429	0.595	1.29046	0.557106	2.98918	11	6520	13	8340	0.552054	0.722589	not_significant	0.110745	0.258019	1.4328	1.234	1.631	0.101	14.144	0	-0.0498	-0.055	-0.045	0.002	-20.554	0	0.4427	0.306	0.579	0.07	6.346	0	0.2904	0.178	0.403	0.057	5.071	0	1.1259	1.019	1.233	0.054	20.701	0	-0.1536
Complex regional/central pain syndrome	neurological	0.6066	-0.743	1.956	0.689	0.881	1.83418	0.475685	7.07099	10	6521	10	8343	0.378338	0.583326	not_significant	0.263443	0.42212	1.4336	1.235	1.632	0.101	14.152	0	-0.0499	-0.055	-0.045	0.002	-20.561	0	0.4429	0.306	0.58	0.07	6.35	0	0.2902	0.178	0.402	0.057	5.067	0	1.1258	1.019	1.232	0.054	20.698	0	-0.1539
Complication due to other implant and internal device	injuries & poisonings	-0.1234	-1.121	0.874	0.509	-0.242	0.88391	0.325954	2.39648	10	6521	10	8343	0.808501	0.892008	not_significant	-0.0535919	0.0923192	1.433	1.234	1.632	0.101	14.146	0	-0.0498	-0.055	-0.045	0.002	-20.551	0	0.4426	0.306	0.579	0.07	6.344	0	0.2904	0.178	0.403	0.057	5.07	0	1.1258	1.019	1.232	0.054	20.699	0	-0.1535
Complication of colostomy or enterostomy	injuries & poisonings	0.5327	-2.023	3.088	1.304	0.409	1.70353	0.132258	21.9332	10	6521	10	8343	0.682878	0.808087	not_significant	0.231349	0.165657	1.4329	1.234	1.631	0.101	14.144	0	-0.0498	-0.055	-0.045	0.002	-20.551	0	0.4427	0.306	0.579	0.07	6.346	0	0.2902	0.178	0.402	0.057	5.068	0	1.1256	1.019	1.232	0.054	20.693	0	-0.1535
Complication of internal orthopedic device	injuries & poisonings	0.0197	-0.614	0.654	0.324	0.061	1.0199	0.541182	1.92322	19	6512	24	8329	0.95142	0.981105	not_significant	0.0085556	0.0216279	1.433	1.234	1.631	0.101	14.145	0	-0.0498	-0.055	-0.045	0.002	-20.552	0	0.4428	0.306	0.58	0.07	6.346	0	0.2902	0.178	0.402	0.057	5.068	0	1.1259	1.019	1.232	0.054	20.699	0	-0.1533
Complications of cardiac/vascular device, implant, and graft	injuries & poisonings	1.7151	0.812	2.618	0.461	3.722	5.55723	2.25241	13.7083	22	6509	10	8343	0.000197975	0.00260529	mi_significant	0.744858	3.70339	1.4393	1.241	1.638	0.101	14.194	0	-0.0501	-0.055	-0.045	0.002	-20.632	0	0.4435	0.307	0.58	0.07	6.352	0	0.2889	0.177	0.401	0.057	5.042	0	1.1285	1.022	1.235	0.054	20.734	0	-0.1513
Complications of gastrostomy, colostomy and enterostomy	digestive	0.3046	-1.739	2.348	1.043	0.292	1.35608	0.175696	10.4646	10	6521	10	8343	0.770165	0.867256	not_significant	0.132286	0.113416	1.433	1.234	1.632	0.101	14.146	0	-0.0498	-0.055	-0.045	0.002	-20.553	0	0.4427	0.306	0.579	0.07	6.346	0	0.2901	0.178	0.402	0.057	5.065	0	1.1257	1.019	1.232	0.054	20.697	0	-0.1535
Complications of surgical and medical procedures		1.0842	0.714	1.455	0.189	5.735	2.95707	2.04214	4.28448	90	6441	49	8304	9.72536e-09	9.88995e-07	mi_significant	0.470862	8.01209	1.4412	1.243	1.64	0.101	14.216	0	-0.0504	-0.055	-0.046	0.002	-20.749	0	0.4464	0.309	0.583	0.07	6.389	0	0.2927	0.18	0.405	0.057	5.104	0	1.1323	1.025	1.239	0.054	20.782	0	-0.1477
Complications of transplants and reattached limbs	injuries & poisonings	0.6897	0.225	1.154	0.237	2.91	1.99312	1.25232	3.17085	46	6485	37	8316	0.00361107	0.0228413	mi_significant	0.299533	2.44236	1.4366	1.238	1.635	0.101	14.178	0	-0.0501	-0.055	-0.045	0.002	-20.634	0	0.4445	0.308	0.581	0.07	6.37	0	0.291	0.179	0.403	0.057	5.078	0	1.1289	1.022	1.236	0.054	20.742	0	-0.1502
Concussion	injuries & poisonings	-0.4891	-1.115	0.137	0.32	-1.53	0.613178	0.327915	1.14683	14	6517	38	8315	0.12591	0.282603	not_significant	-0.212413	0.89994	1.4348	1.236	1.633	0.101	14.161	0	-0.0498	-0.055	-0.045	0.002	-20.543	0	0.4402	0.303	0.577	0.07	6.308	0	0.2889	0.177	0.401	0.057	5.045	0	1.1239	1.017	1.231	0.054	20.657	0	-0.1536
Conduct disorders	mental disorders	-1.4085	-3.559	0.742	1.097	-1.284	0.24451	0.0284673	2.10013	10	6521	10	8343	0.199306	0.387474	not_significant	-0.611704	0.70048	1.4333	1.235	1.632	0.101	14.148	0	-0.0498	-0.055	-0.045	0.002	-20.538	0	0.4413	0.305	0.578	0.07	6.325	0	0.2888	0.177	0.401	0.057	5.042	0	1.1248	1.018	1.231	0.054	20.677	0	-0.1543
Conductive hearing loss	sense organs	-0.4971	-1.082	0.087	0.298	-1.667	0.608292	0.338917	1.0909	19	6512	37	8316	0.0955111	0.229574	not_significant	-0.215888	1.01995	1.4343	1.236	1.633	0.101	14.158	0	-0.0498	-0.055	-0.045	0.002	-20.541	0	0.4411	0.304	0.578	0.07	6.322	0	0.2895	0.177	0.402	0.057	5.054	0	1.126	1.019	1.233	0.054	20.699	0	-0.1546
Congenital anomalies of esophagus	congenital anomalies	0.1037	-1.68	1.888	0.91	0.114	1.10927	0.186374	6.60614	10	6521	10	8343	0.909258	0.952551	not_significant	0.0450363	0.041313	1.4331	1.235	1.632	0.101	14.146	0	-0.0498	-0.055	-0.045	0.002	-20.553	0	0.4426	0.306	0.579	0.07	6.345	0	0.2902	0.178	0.402	0.057	5.068	0	1.1258	1.019	1.232	0.054	20.699	0	-0.1535
Congenital anomalies of face and neck	congenital anomalies	0.7466	-0.627	2.12	0.701	1.065	2.10981	0.534192	8.33114	10	6521	10	8343	0.286809	0.487981	not_significant	0.324244	0.542407	1.4346	1.236	1.633	0.101	14.159	0	-0.0499	-0.055	-0.045	0.002	-20.565	0	0.4423	0.306	0.579	0.07	6.341	0	0.2896	0.177	0.402	0.057	5.057	0	1.1255	1.019	1.232	0.054	20.693	0	-0.154
Congenital anomalies of genital organs	congenital anomalies	1.1726	0.082	2.263	0.556	2.108	3.23038	1.08546	9.61188	12	6519	10	8343	0.0350622	0.115673	not_significant	0.509254	1.45516	1.4307	1.232	1.629	0.101	14.122	0	-0.0498	-0.055	-0.045	0.002	-20.543	0	0.4431	0.306	0.58	0.07	6.351	0	0.2892	0.177	0.402	0.057	5.05	0	1.1263	1.02	1.233	0.054	20.706	0	-0.1535
Congenital anomalies of great vessels	congenital anomalies	-0.4721	-1.987	1.043	0.773	-0.611	0.623691	0.137106	2.83772	10	6521	10	8343	0.541371	0.71929	not_significant	-0.20503	0.266505	1.4328	1.234	1.631	0.101	14.145	0	-0.0498	-0.055	-0.045	0.002	-20.55	0	0.4425	0.306	0.579	0.07	6.344	0	0.2902	0.178	0.402	0.057	5.068	0	1.126	1.019	1.233	0.054	20.702	0	-0.1533
Congenital anomalies of intestine	congenital anomalies	-0.3823	-1.812	1.047	0.729	-0.524	0.68229	0.163327	2.84909	10	6521	10	8343	0.60011	0.75701	not_significant	-0.166031	0.221769	1.4331	1.235	1.632	0.101	14.147	0	-0.0498	-0.055	-0.045	0.002	-20.549	0	0.4423	0.306	0.579	0.07	6.34	0	0.2901	0.178	0.402	0.057	5.065	0	1.1257	1.019	1.232	0.054	20.695	0	-0.1537
Congenital anomalies of male genital organs	congenital anomalies	-0.1205	-1.212	0.971	0.557	-0.216	0.886477	0.297601	2.64058	10	6521	10	8343	0.828639	0.906088	not_significant	-0.0523325	0.0816347	1.433	1.234	1.632	0.101	14.146	0	-0.0498	-0.055	-0.045	0.002	-20.553	0	0.4428	0.306	0.579	0.07	6.347	0	0.2904	0.178	0.403	0.057	5.07	0	1.126	1.019	1.233	0.054	20.7	0	-0.1534
Congenital anomalies of mouth/tongue	congenital anomalies	1.146	0.099	2.193	0.534	2.144	3.14559	1.10407	8.96206	10	6521	10	8343	0.0319993	0.108469	not_significant	0.497701	1.49486	1.433	1.234	1.632	0.101	14.145	0	-0.0499	-0.055	-0.045	0.002	-20.56	0	0.4436	0.307	0.58	0.07	6.359	0	0.2911	0.179	0.403	0.057	5.083	0	1.1262	1.02	1.233	0.054	20.705	0	-0.1555
Congenital anomalies of muscle, tendon, fascia, and connective tissue	congenital anomalies	1.1105	-1.202	3.423	1.18	0.941	3.03588	0.300592	30.6613	10	6521	10	8343	0.346686	0.551423	not_significant	0.482284	0.460064	1.4329	1.234	1.631	0.101	14.145	0	-0.0498	-0.055	-0.045	0.002	-20.552	0	0.4427	0.306	0.579	0.07	6.346	0	0.2898	0.178	0.402	0.057	5.06	0	1.1253	1.019	1.232	0.054	20.688	0	-0.1536
Congenital anomalies of peripheral vascular system	congenital anomalies	0.3178	-0.57	1.206	0.453	0.701	1.3741	0.565525	3.3401	11	6520	11	8342	0.483149	0.678025	not_significant	0.138019	0.315919	1.4343	1.236	1.633	0.101	14.156	0	-0.0499	-0.055	-0.045	0.002	-20.562	0	0.4419	0.305	0.579	0.07	6.335	0	0.29	0.178	0.402	0.057	5.063	0	1.1252	1.019	1.232	0.054	20.684	0	-0.1539
Congenital anomalies of skin	dermatologic	0.184	-0.383	0.751	0.289	0.636	1.20202	0.681813	2.11912	23	6508	30	8323	0.524607	0.707684	not_significant	0.0799102	0.280166	1.4328	1.234	1.631	0.101	14.144	0	-0.0499	-0.055	-0.045	0.002	-20.557	0	0.4427	0.306	0.579	0.07	6.346	0	0.2906	0.178	0.403	0.057	5.075	0	1.1263	1.02	1.233	0.054	20.706	0	-0.1534
Congenital anomalies of the eye	congenital anomalies	1.2717	-0.387	2.93	0.846	1.503	3.56691	0.679091	18.7276	10	6521	10	8343	0.132908	0.291868	not_significant	0.552292	0.876448	1.4328	1.234	1.631	0.101	14.143	0	-0.0499	-0.055	-0.045	0.002	-20.558	0	0.4428	0.306	0.58	0.07	6.346	0	0.2902	0.178	0.402	0.057	5.067	0	1.1266	1.02	1.233	0.054	20.709	0	-0.1526
Congenital anomalies of the integument	congenital anomalies	1.3083	0.002	2.614	0.666	1.963	3.69988	1.002	13.6536	10	6521	10	8343	0.0496239	0.145442	not_significant	0.568187	1.30431	1.4326	1.234	1.631	0.101	14.144	0	-0.0499	-0.055	-0.045	0.002	-20.582	0	0.4457	0.309	0.583	0.07	6.387	0	0.2917	0.179	0.404	0.057	5.092	0	1.1289	1.022	1.236	0.054	20.743	0	-0.1508
Congenital anomalies of upper limb, including shoulder girdle	congenital anomalies	-0.1578	-1.711	1.395	0.792	-0.199	0.854021	0.180685	4.03497	10	6521	10	8343	0.842202	0.915618	not_significant	-0.0685317	0.0745838	1.4328	1.234	1.631	0.101	14.144	0	-0.0498	-0.055	-0.045	0.002	-20.549	0	0.4427	0.306	0.579	0.07	6.347	0	0.2903	0.178	0.403	0.057	5.069	0	1.1259	1.019	1.232	0.054	20.7	0	-0.1534
Congenital anomalies of urinary system	congenital anomalies	-0.8475	-3.949	2.254	1.583	-0.536	0.428485	0.019274	9.52576	10	6521	10	8343	0.592271	0.751423	not_significant	-0.368065	0.227479	1.4337	1.235	1.632	0.101	14.152	0	-0.0499	-0.055	-0.045	0.002	-20.559	0	0.4434	0.307	0.58	0.07	6.355	0	0.2902	0.178	0.402	0.057	5.068	0	1.1261	1.019	1.233	0.054	20.703	0	-0.1533
Congenital anomaly of fingers/toes	congenital anomalies	0.0076	-2.88	2.895	1.473	0.005	1.00763	0.0561348	18.0835	10	6521	10	8343	0.995905	0.997123	not_significant	0.00330064	0.0017821	1.433	1.234	1.632	0.101	14.144	0	-0.0498	-0.055	-0.045	0.002	-20.549	0	0.4427	0.306	0.579	0.07	6.346	0	0.2902	0.178	0.402	0.057	5.068	0	1.1258	1.019	1.232	0.054	20.697	0	-0.1534
Congenital anomaly of gallbladder, bile ducts, liver, pancreas	congenital anomalies	2.0896	-0.075	4.254	1.104	1.892	8.08168	0.927743	70.3864	10	6521	10	8343	0.0584662	0.162721	not_significant	0.907502	1.23309	1.4335	1.235	1.632	0.101	14.147	0	-0.0498	-0.055	-0.045	0.002	-20.552	0	0.44	0.303	0.577	0.07	6.305	0	0.2895	0.177	0.402	0.057	5.054	0	1.1259	1.019	1.232	0.054	20.7	0	-0.1546
Congenital cataract and lens anomalies	congenital anomalies	1.0249	-1.426	3.475	1.25	0.82	2.78682	0.240268	32.2978	10	6521	10	8343	0.412367	0.622317	not_significant	0.445108	0.384716	1.4329	1.234	1.631	0.101	14.144	0	-0.0498	-0.055	-0.045	0.002	-20.554	0	0.4431	0.306	0.58	0.07	6.352	0	0.2906	0.178	0.403	0.057	5.074	0	1.126	1.019	1.233	0.054	20.7	0	-0.1532
Congenital deficiency of other clotting factors (including factor VII)	hematopoietic	0.3203	-2.297	2.937	1.335	0.24	1.37754	0.10056	18.8592	10	6521	10	8343	0.810404	0.892795	not_significant	0.139105	0.0912986	1.4327	1.234	1.631	0.101	14.143	0	-0.0498	-0.055	-0.045	0.002	-20.549	0	0.4427	0.306	0.579	0.07	6.346	0	0.2902	0.178	0.402	0.057	5.068	0	1.1257	1.019	1.232	0.054	20.695	0	-0.1535
Congenital deformities of feet	congenital anomalies	0.0669	-0.663	0.797	0.372	0.18	1.06919	0.515303	2.21887	12	6519	20	8333	0.85734	0.921444	not_significant	0.0290543	0.0668471	1.4329	1.234	1.631	0.101	14.144	0	-0.0498	-0.055	-0.045	0.002	-20.553	0	0.443	0.306	0.58	0.07	6.349	0	0.2904	0.178	0.403	0.057	5.07	0	1.126	1.019	1.233	0.054	20.699	0	-0.1534
Congenital hip dysplasia and deformity	congenital anomalies	0.6372	-2.145	3.42	1.42	0.449	1.89118	0.117068	30.5694	10	6521	10	8343	0.653556	0.789764	not_significant	0.276732	0.184717	1.4328	1.234	1.631	0.101	14.144	0	-0.0498	-0.055	-0.045	0.002	-20.553	0	0.443	0.306	0.58	0.07	6.35	0	0.2904	0.178	0.403	0.057	5.072	0	1.1261	1.019	1.233	0.054	20.703	0	-0.1533
Congenital musculoskeletal deformities of spine	congenital anomalies	0.1151	-0.885	1.115	0.51	0.226	1.12199	0.412714	3.04957	10	6521	10	8343	0.821496	0.900973	not_significant	0.0499873	0.0853946	1.4331	1.235	1.632	0.101	14.147	0	-0.0498	-0.055	-0.045	0.002	-20.553	0	0.4429	0.306	0.58	0.07	6.349	0	0.2903	0.178	0.403	0.057	5.069	0	1.126	1.019	1.233	0.054	20.7	0	-0.1532
Congenital osteodystrophies	congenital anomalies	0.1658	-0.249	0.581	0.212	0.783	1.18034	0.77958	1.78783	44	6487	56	8297	0.433681	0.638448	not_significant	0.072006	0.36283	1.4336	1.235	1.632	0.101	14.152	0	-0.0499	-0.055	-0.045	0.002	-20.566	0	0.4423	0.306	0.579	0.07	6.34	0	0.2904	0.178	0.403	0.057	5.071	0	1.1263	1.02	1.233	0.054	20.705	0	-0.1531
Congestive heart failure (CHF) NOS	circulatory system	1.8438	1.03	2.657	0.415	4.442	6.32051	2.80107	14.2535	24	6507	10	8343	8.93042e-06	0.000250113	mi_significant	0.800752	5.04913	1.4548	1.256	1.654	0.102	14.327	0	-0.0505	-0.055	-0.046	0.002	-20.761	0	0.4461	0.309	0.583	0.07	6.389	0	0.2898	0.177	0.402	0.057	5.056	0	1.1281	1.021	1.235	0.054	20.725	0	-0.153
Conjunctivitis, infectious	sense organs	-0.0819	-0.352	0.188	0.138	-0.595	0.921364	0.70328	1.20683	92	6439	154	8199	0.551948	0.722589	not_significant	-0.0355687	0.258102	1.4337	1.235	1.632	0.101	14.151	0	-0.0498	-0.055	-0.045	0.002	-20.539	0	0.4417	0.305	0.578	0.07	6.329	0	0.2901	0.178	0.402	0.057	5.065	0	1.1249	1.018	1.232	0.054	20.674	0	-0.1534
Conjunctivitis, noninfectious	sense organs	0.7608	-0.119	1.641	0.449	1.694	2.13999	0.887808	5.16033	12	6519	10	8343	0.0902199	0.22252	not_significant	0.330411	1.0447	1.4339	1.235	1.632	0.101	14.155	0	-0.0499	-0.055	-0.045	0.002	-20.566	0	0.4426	0.306	0.579	0.07	6.345	0	0.2905	0.178	0.403	0.057	5.073	0	1.1253	1.019	1.232	0.054	20.689	0	-0.1557
Constipation	digestive	0.7539	0.501	1.007	0.129	5.842	2.12527	1.65037	2.73738	154	6377	120	8233	5.15919e-09	6.82044e-07	mi_significant	0.327415	8.28742	1.4408	1.242	1.64	0.101	14.206	0	-0.0505	-0.055	-0.046	0.002	-20.761	0	0.4477	0.311	0.585	0.07	6.409	0	0.2945	0.182	0.407	0.057	5.136	0	1.1338	1.027	1.241	0.054	20.811	0	-0.1541
Contact and allergic dermatitis of eyelid	dermatologic	0.5775	-0.527	1.682	0.564	1.024	1.78158	0.590373	5.3763	10	6521	10	8343	0.305643	0.50801	not_significant	0.250805	0.514786	1.433	1.234	1.632	0.101	14.146	0	-0.0498	-0.055	-0.045	0.002	-20.558	0	0.4432	0.306	0.58	0.07	6.353	0	0.2904	0.178	0.403	0.057	5.071	0	1.1255	1.019	1.232	0.054	20.692	0	-0.1537
Contact dermatitis and other eczema due to plants [except food]	dermatologic	-1.0348	-1.729	-0.341	0.354	-2.922	0.355297	0.177462	0.711059	10	6521	47	8306	0.00348093	0.022124	con_significant	-0.449408	2.45831	1.4383	1.24	1.637	0.101	14.193	0	-0.0498	-0.055	-0.045	0.002	-20.518	0	0.4346	0.298	0.571	0.07	6.226	0	0.284	0.172	0.396	0.057	4.954	0	1.1182	1.012	1.225	0.054	20.538	0	-0.1588
Contracture of joint	musculoskeletal	-0.0974	-1.177	0.982	0.551	-0.177	0.907193	0.308202	2.66979	10	6521	10	8343	0.859593	0.921832	not_significant	-0.0423003	0.0657072	1.4329	1.234	1.631	0.101	14.145	0	-0.0498	-0.055	-0.045	0.002	-20.551	0	0.4427	0.306	0.579	0.07	6.347	0	0.2902	0.178	0.402	0.057	5.068	0	1.1259	1.019	1.232	0.054	20.7	0	-0.1533
Contracture of palmar fascia [Dupuytren's disease]	musculoskeletal	0.1967	-0.691	1.084	0.453	0.435	1.21738	0.501075	2.95648	10	6521	14	8339	0.663901	0.794997	not_significant	0.0854257	0.177897	1.4341	1.236	1.633	0.101	14.152	0	-0.0499	-0.055	-0.045	0.002	-20.553	0	0.4431	0.306	0.58	0.07	6.351	0	0.2903	0.178	0.403	0.057	5.069	0	1.126	1.019	1.233	0.054	20.702	0	-0.1534
Contracture of tendon (sheath)	musculoskeletal	0.1509	-1.092	1.394	0.634	0.238	1.16288	0.335545	4.03094	10	6521	10	8343	0.812017	0.893827	not_significant	0.065535	0.0904351	1.4331	1.235	1.632	0.101	14.147	0	-0.0498	-0.055	-0.045	0.002	-20.553	0	0.4427	0.306	0.579	0.07	6.346	0	0.2901	0.178	0.402	0.057	5.065	0	1.1258	1.019	1.232	0.054	20.699	0	-0.1537
Contusion	injuries & poisonings	-0.0549	-0.306	0.196	0.128	-0.429	0.94658	0.736387	1.21653	107	6424	177	8176	0.668032	0.797776	not_significant	-0.0238428	0.175203	1.4337	1.235	1.632	0.101	14.15	0	-0.0498	-0.055	-0.045	0.002	-20.542	0	0.4419	0.305	0.579	0.07	6.332	0	0.29	0.178	0.402	0.057	5.063	0	1.125	1.018	1.232	0.054	20.669	0	-0.1535
Convulsions	neurological	0.782	0.2	1.364	0.297	2.635	2.18584	1.2214	3.91181	38	6493	19	8334	0.00841342	0.0417119	mi_significant	0.339618	2.07503	1.4291	1.23	1.628	0.101	14.103	0	-0.0498	-0.055	-0.045	0.002	-20.522	0	0.441	0.304	0.578	0.07	6.32	0	0.2889	0.177	0.401	0.057	5.044	0	1.1232	1.017	1.23	0.054	20.646	0	-0.1548
Cornea replaced by transplant	sense organs	0.1558	-2.348	2.66	1.278	0.122	1.16859	0.0955601	14.2963	10	6521	10	8343	0.902943	0.94931	not_significant	0.0676631	0.0443397	1.4332	1.235	1.632	0.101	14.146	0	-0.0498	-0.055	-0.045	0.002	-20.552	0	0.4427	0.306	0.579	0.07	6.346	0	0.2901	0.178	0.402	0.057	5.065	0	1.1258	1.019	1.232	0.054	20.699	0	-0.1534
Corneal degenerations	sense organs	0.8933	-0.586	2.372	0.755	1.184	2.44318	0.556549	10.7188	10	6521	10	8343	0.236513	0.422431	not_significant	0.387955	0.626146	1.432	1.233	1.631	0.101	14.134	0	-0.0498	-0.055	-0.045	0.002	-20.554	0	0.4435	0.307	0.58	0.07	6.357	0	0.2912	0.179	0.404	0.057	5.085	0	1.127	1.02	1.234	0.054	20.715	0	-0.1522
Corneal dystrophy	sense organs	0.9191	-1.661	3.5	1.317	0.698	2.50703	0.189949	33.1155	10	6521	10	8343	0.485136	0.679396	not_significant	0.39916	0.314136	1.4345	1.236	1.633	0.101	14.158	0	-0.0499	-0.055	-0.045	0.002	-20.565	0	0.4428	0.306	0.579	0.07	6.347	0	0.2902	0.178	0.402	0.057	5.068	0	1.1259	1.019	1.233	0.054	20.7	0	-0.1537
Corneal edema	sense organs	0.7973	-2.108	3.702	1.482	0.538	2.21954	0.121481	40.5283	10	6521	10	8343	0.590621	0.750049	not_significant	0.346263	0.228691	1.4341	1.236	1.633	0.101	14.153	0	-0.0499	-0.055	-0.045	0.002	-20.558	0	0.4428	0.306	0.579	0.07	6.347	0	0.2902	0.178	0.402	0.057	5.068	0	1.1256	1.019	1.232	0.054	20.695	0	-0.1535
Corneal opacity	sense organs	0.918	-0.118	1.954	0.529	1.737	2.50428	0.888696	7.05686	10	6521	10	8343	0.0824189	0.209534	not_significant	0.398682	1.08397	1.436	1.237	1.635	0.101	14.172	0	-0.0499	-0.055	-0.045	0.002	-20.587	0	0.4425	0.306	0.579	0.07	6.343	0	0.2901	0.178	0.402	0.057	5.066	0	1.126	1.019	1.233	0.054	20.701	0	-0.1533
Corneal opacity and other disorders of cornea	sense organs	0.4225	-0.504	1.349	0.473	0.894	1.52577	0.604109	3.85357	10	6521	11	8342	0.371364	0.578468	not_significant	0.183489	0.4302	1.4348	1.236	1.633	0.101	14.161	0	-0.0499	-0.055	-0.045	0.002	-20.569	0	0.4426	0.306	0.579	0.07	6.345	0	0.2898	0.178	0.402	0.057	5.06	0	1.1259	1.019	1.233	0.054	20.7	0	-0.1536
Corneal ulcer	sense organs	0.5066	-0.751	1.765	0.642	0.789	1.65964	0.471894	5.84157	10	6521	10	8343	0.429987	0.634423	not_significant	0.220014	0.366545	1.4341	1.236	1.633	0.101	14.155	0	-0.0499	-0.055	-0.045	0.002	-20.564	0	0.4428	0.306	0.58	0.07	6.348	0	0.2901	0.178	0.402	0.057	5.067	0	1.1263	1.02	1.233	0.054	20.706	0	-0.1532
Corns and callosities	dermatologic	0.0031	-0.405	0.411	0.208	0.015	1.0031	0.666977	1.50833	41	6490	66	8287	0.987968	0.992472	not_significant	0.00134631	0.0052571	1.433	1.234	1.632	0.101	14.143	0	-0.0498	-0.055	-0.045	0.002	-20.539	0	0.4427	0.306	0.579	0.07	6.346	0	0.2902	0.178	0.402	0.057	5.068	0	1.1258	1.019	1.232	0.054	20.699	0	-0.1534
Coronary atherosclerosis	circulatory system	0.3334	0.016	0.651	0.162	2.056	1.39571	1.01613	1.91746	72	6459	106	8247	0.0398144	0.127445	not_significant	0.144794	1.39996	1.4484	1.249	1.648	0.102	14.252	0	-0.0503	-0.055	-0.046	0.002	-20.64	0	0.4411	0.304	0.578	0.07	6.323	0	0.2895	0.177	0.402	0.057	5.054	0	1.1267	1.02	1.233	0.054	20.71	0	-0.1559
Costochondritis		-0.0255	-0.734	0.683	0.361	-0.071	0.974822	0.479985	1.97981	13	6518	22	8331	0.943639	0.976992	not_significant	-0.0110745	0.0251939	1.4331	1.234	1.632	0.101	14.146	0	-0.0498	-0.055	-0.045	0.002	-20.55	0	0.4426	0.306	0.579	0.07	6.343	0	0.2901	0.178	0.402	0.057	5.063	0	1.1257	1.019	1.232	0.054	20.683	0	-0.1535
Cough	respiratory	0.3282	0.181	0.476	0.075	4.366	1.38847	1.19842	1.60962	389	6142	431	7922	1.26588e-05	0.000328135	mi_significant	0.142535	4.89761	1.4272	1.229	1.626	0.101	14.08	0	-0.0503	-0.055	-0.046	0.002	-20.702	0	0.4559	0.319	0.593	0.07	6.526	0	0.2908	0.178	0.403	0.057	5.073	0	1.1379	1.031	1.245	0.055	20.872	0	-0.1493
Cramp of limb		0.6706	0.072	1.269	0.305	2.196	1.95541	1.07466	3.55729	25	6506	22	8331	0.0280837	0.100614	not_significant	0.291238	1.55155	1.4354	1.237	1.634	0.101	14.165	0	-0.05	-0.055	-0.045	0.002	-20.596	0	0.4418	0.305	0.579	0.07	6.331	0	0.292	0.18	0.404	0.057	5.097	0	1.128	1.021	1.235	0.054	20.731	0	-0.1524
Crushing injury		-0.589	-1.666	0.488	0.55	-1.072	0.554882	0.189002	1.62905	10	6521	12	8341	0.283911	0.483673	not_significant	-0.255799	0.546818	1.4341	1.236	1.633	0.101	14.155	0	-0.0498	-0.055	-0.045	0.002	-20.551	0	0.4414	0.305	0.578	0.07	6.327	0	0.2892	0.177	0.401	0.057	5.049	0	1.1253	1.019	1.232	0.054	20.688	0	-0.1541
Crushing or internal injury to organs		0.2386	-0.628	1.105	0.442	0.54	1.26947	0.533658	3.01922	10	6521	13	8340	0.58944	0.750049	not_significant	0.103623	0.22956	1.4331	1.235	1.632	0.101	14.147	0	-0.0498	-0.055	-0.045	0.002	-20.557	0	0.4431	0.306	0.58	0.07	6.351	0	0.2902	0.178	0.402	0.057	5.068	0	1.1261	1.02	1.233	0.054	20.703	0	-0.1533
Crystal arthropathies	endocrine/metabolic	0.0421	-1.217	1.301	0.642	0.066	1.043	0.296117	3.67297	10	6521	10	8343	0.947707	0.978515	not_significant	0.0182838	0.0233261	1.433	1.234	1.632	0.101	14.146	0	-0.0498	-0.055	-0.045	0.002	-20.551	0	0.4428	0.306	0.58	0.07	6.347	0	0.2902	0.178	0.402	0.057	5.067	0	1.1259	1.019	1.233	0.054	20.697	0	-0.1533
Curvature of spine	musculoskeletal	0.6428	-2.225	3.511	1.463	0.439	1.9018	0.108067	33.4817	10	6521	10	8343	0.660429	0.793653	not_significant	0.279164	0.180174	1.4336	1.235	1.632	0.101	14.15	0	-0.0498	-0.055	-0.045	0.002	-20.556	0	0.4423	0.306	0.579	0.07	6.34	0	0.29	0.178	0.402	0.057	5.063	0	1.1259	1.019	1.232	0.054	20.7	0	-0.1534
Cyst and pseudocyst of pancreas	digestive	-0.7447	-2.303	0.814	0.795	-0.936	0.474877	0.0999585	2.25692	10	6521	10	8343	0.349038	0.551423	not_significant	-0.323419	0.457128	1.4311	1.233	1.63	0.101	14.126	0	-0.0498	-0.055	-0.045	0.002	-20.531	0	0.4427	0.306	0.579	0.07	6.346	0	0.2907	0.178	0.403	0.057	5.075	0	1.126	1.019	1.233	0.054	20.702	0	-0.1525
Cyst of bone	musculoskeletal	0.6661	-0.639	1.971	0.666	1	1.94663	0.52782	7.17785	10	6521	10	8343	0.317111	0.523372	not_significant	0.289284	0.498788	1.4334	1.235	1.632	0.101	14.15	0	-0.0499	-0.055	-0.045	0.002	-20.564	0	0.4424	0.306	0.579	0.07	6.342	0	0.2904	0.178	0.403	0.057	5.071	0	1.1266	1.02	1.233	0.054	20.711	0	-0.153
Cyst of kidney, acquired	genitourinary	1.1196	0.612	1.627	0.259	4.324	3.06363	1.84412	5.08859	41	6490	27	8326	1.53038e-05	0.000374661	mi_significant	0.486236	4.8152	1.4503	1.251	1.649	0.102	14.288	0	-0.0504	-0.055	-0.046	0.002	-20.738	0	0.4393	0.302	0.576	0.07	6.291	0	0.2917	0.179	0.404	0.057	5.089	0	1.1306	1.024	1.237	0.054	20.771	0	-0.1524
Cyst of the salivary gland	digestive	-0.9546	-3.269	1.36	1.181	-0.808	0.384966	0.0380445	3.89619	10	6521	10	8343	0.418922	0.627196	not_significant	-0.414578	0.377867	1.4339	1.235	1.632	0.101	14.154	0	-0.0498	-0.055	-0.045	0.002	-20.556	0	0.4421	0.305	0.579	0.07	6.337	0	0.2896	0.177	0.402	0.057	5.056	0	1.1255	1.019	1.232	0.054	20.692	0	-0.1538
Cystic fibrosis	respiratory	2.0235	-0.129	4.176	1.098	1.842	7.56476	0.878974	65.1049	10	6521	10	8343	0.065457	0.176961	not_significant	0.878795	1.18404	1.4302	1.232	1.629	0.101	14.116	0	-0.0498	-0.055	-0.045	0.002	-20.519	0	0.4426	0.306	0.579	0.07	6.345	0	0.2888	0.177	0.401	0.057	5.042	0	1.1254	1.019	1.232	0.054	20.692	0	-0.1551
Cystic kidney disease	congenital anomalies	1.6719	0.872	2.472	0.408	4.098	5.32227	2.39169	11.8461	25	6506	10	8343	4.1705e-05	0.000787628	mi_significant	0.726097	4.37981	1.4402	1.241	1.639	0.101	14.197	0	-0.0502	-0.055	-0.045	0.002	-20.658	0	0.4465	0.31	0.583	0.07	6.396	0	0.292	0.18	0.404	0.057	5.094	0	1.1303	1.024	1.237	0.054	20.762	0	-0.1505
Cystitis	genitourinary	0.2198	-0.794	1.234	0.517	0.425	1.24583	0.452033	3.43494	10	6521	10	8343	0.670927	0.798704	not_significant	0.0954579	0.173325	1.4337	1.235	1.632	0.101	14.151	0	-0.0499	-0.055	-0.045	0.002	-20.557	0	0.4429	0.306	0.58	0.07	6.348	0	0.2901	0.178	0.402	0.057	5.066	0	1.1256	1.019	1.232	0.054	20.695	0	-0.1535
Cystoid macular degeneration of retina	sense organs	1.4176	-0.166	3.001	0.808	1.755	4.1272	0.847046	20.1056	10	6521	10	8343	0.0792677	0.202692	not_significant	0.615656	1.1009	1.4365	1.238	1.635	0.101	14.179	0	-0.05	-0.055	-0.045	0.002	-20.602	0	0.4442	0.308	0.581	0.07	6.368	0	0.2918	0.18	0.404	0.057	5.094	0	1.1282	1.022	1.235	0.054	20.732	0	-0.1514
Cysts of oral soft tissues	digestive	0.6647	-2.138	3.467	1.43	0.465	1.94391	0.11789	32.0405	10	6521	10	8343	0.642043	0.783402	not_significant	0.288676	0.192436	1.4332	1.235	1.632	0.101	14.147	0	-0.0498	-0.055	-0.045	0.002	-20.555	0	0.443	0.306	0.58	0.07	6.35	0	0.2902	0.178	0.402	0.057	5.067	0	1.1261	1.019	1.233	0.054	20.703	0	-0.1531
Debility unspecified		1.9551	0.516	3.395	0.734	2.662	7.06463	1.67531	29.8147	10	6521	10	8343	0.00776325	0.0399339	mi_significant	0.849089	2.10996	1.4366	1.238	1.635	0.101	14.174	0	-0.05	-0.055	-0.045	0.002	-20.617	0	0.447	0.31	0.584	0.07	6.404	0	0.293	0.181	0.405	0.057	5.114	0	1.1292	1.023	1.236	0.054	20.744	0	-0.1493
Decreased libido	mental disorders	0.3399	0.053	0.627	0.147	2.318	1.40481	1.05443	1.87199	94	6437	113	8240	0.0204518	0.0807083	not_significant	0.147617	1.68927	1.4356	1.237	1.634	0.101	14.169	0	-0.0501	-0.055	-0.045	0.002	-20.628	0	0.4468	0.31	0.584	0.07	6.4	0	0.2927	0.18	0.405	0.057	5.11	0	1.1302	1.023	1.237	0.054	20.761	0	-0.1516
Decreased white blood cell count	hematopoietic	0.7976	0.42	1.175	0.192	4.145	2.22021	1.52196	3.23814	68	6463	54	8299	3.39219e-05	0.000679466	mi_significant	0.346393	4.46952	1.4338	1.235	1.632	0.101	14.153	0	-0.05	-0.055	-0.045	0.002	-20.627	0	0.4451	0.308	0.582	0.07	6.378	0	0.2925	0.18	0.405	0.057	5.104	0	1.1303	1.024	1.237	0.054	20.763	0	-0.157
Decubitus ulcer	dermatologic	2.1471	0.997	3.297	0.587	3.659	8.56	2.71014	27.0314	17	6514	10	8343	0.000252848	0.00312398	mi_significant	0.932474	3.59714	1.4446	1.246	1.643	0.101	14.236	0	-0.0502	-0.055	-0.045	0.002	-20.669	0	0.4441	0.307	0.581	0.07	6.361	0	0.2906	0.178	0.403	0.057	5.07	0	1.1279	1.021	1.235	0.054	20.722	0	-0.1509
Deep vein thrombosis [DVT]	circulatory system	0.571	0.055	1.087	0.263	2.168	1.77004	1.05654	2.96536	29	6502	36	8317	0.030148	0.10381	not_significant	0.247982	1.52074	1.4398	1.241	1.638	0.101	14.203	0	-0.0501	-0.055	-0.045	0.002	-20.628	0	0.4433	0.307	0.58	0.07	6.353	0	0.2915	0.179	0.404	0.057	5.089	0	1.1286	1.022	1.235	0.054	20.74	0	-0.1539
Defibrination syndrome	hematopoietic	2.2694	-0.142	4.681	1.23	1.844	9.67359	0.867621	107.878	10	6521	10	8343	0.0651129	0.176961	not_significant	0.985588	1.18633	1.434	1.235	1.633	0.101	14.154	0	-0.0499	-0.055	-0.045	0.002	-20.577	0	0.4442	0.307	0.581	0.07	6.366	0	0.2916	0.179	0.404	0.057	5.091	0	1.1268	1.02	1.233	0.054	20.712	0	-0.1528
Deficiency anemias	hematopoietic	0.8901	-0.197	1.977	0.555	1.604	2.43537	0.821191	7.22105	10	6521	10	8343	0.108624	0.25149	not_significant	0.386566	0.964074	1.432	1.234	1.631	0.101	14.137	0	-0.0499	-0.055	-0.045	0.002	-20.565	0	0.444	0.307	0.581	0.07	6.364	0	0.2905	0.178	0.403	0.057	5.072	0	1.1277	1.021	1.234	0.054	20.726	0	-0.1517
Deficiency of humoral immunity	endocrine/metabolic	0.5801	-0.519	1.679	0.561	1.034	1.78622	0.595115	5.36019	10	6521	10	8343	0.301	0.504337	not_significant	0.251934	0.521433	1.432	1.233	1.631	0.101	14.135	0	-0.0498	-0.055	-0.045	0.002	-20.55	0	0.4432	0.306	0.58	0.07	6.353	0	0.2902	0.178	0.402	0.057	5.067	0	1.1264	1.02	1.233	0.054	20.708	0	-0.1529
Degeneration of intervertebral disc	musculoskeletal	0.0543	-0.153	0.262	0.106	0.512	1.0558	0.85813	1.29953	156	6375	272	8081	0.608429	0.763003	not_significant	0.0235822	0.21579	1.4355	1.237	1.634	0.101	14.154	0	-0.0499	-0.055	-0.045	0.002	-20.518	0	0.4437	0.307	0.58	0.07	6.357	0	0.2903	0.178	0.403	0.057	5.07	0	1.1269	1.02	1.234	0.054	20.703	0	-0.1536
Degenerative and vascular disorders of ear	sense organs	0.8102	-0.326	1.947	0.58	1.397	2.24836	0.721805	7.00763	10	6521	10	8343	0.162342	0.335862	not_significant	0.351865	0.789569	1.4385	1.24	1.637	0.101	14.189	0	-0.05	-0.055	-0.045	0.002	-20.593	0	0.4425	0.306	0.579	0.07	6.342	0	0.2898	0.178	0.402	0.057	5.06	0	1.1259	1.019	1.232	0.054	20.7	0	-0.1539
Degenerative disease of the spinal cord	neurological	0.2309	-0.45	0.912	0.347	0.665	1.25973	0.637628	2.4893	17	6514	21	8332	0.506367	0.696584	not_significant	0.100279	0.295534	1.4348	1.236	1.633	0.101	14.159	0	-0.0499	-0.055	-0.045	0.002	-20.562	0	0.4428	0.306	0.58	0.07	6.347	0	0.2899	0.178	0.402	0.057	5.062	0	1.1256	1.019	1.232	0.054	20.695	0	-0.1533
Delirium dementia and amnestic and other cognitive disorders	mental disorders	1.4693	-1.337	4.276	1.432	1.026	4.34619	0.262632	71.9521	10	6521	10	8343	0.30485	0.507759	not_significant	0.638109	0.515914	1.4364	1.238	1.635	0.101	14.17	0	-0.0499	-0.055	-0.045	0.002	-20.573	0	0.4428	0.306	0.58	0.07	6.347	0	0.2892	0.177	0.402	0.057	5.05	0	1.126	1.019	1.233	0.054	20.701	0	-0.1532
Delirium due to conditions classified elsewhere	mental disorders	1.7464	0.046	3.447	0.868	2.013	5.73392	1.04707	31.406	10	6521	10	8343	0.0441154	0.135945	not_significant	0.758452	1.35541	1.4361	1.238	1.635	0.101	14.171	0	-0.0499	-0.055	-0.045	0.002	-20.582	0	0.4422	0.305	0.579	0.07	6.338	0	0.2898	0.177	0.402	0.057	5.059	0	1.1267	1.02	1.233	0.054	20.712	0	-0.1537
Dementias	mental disorders	0.3231	-2.14	2.786	1.257	0.257	1.3814	0.117655	16.216	10	6521	10	8343	0.797115	0.883689	not_significant	0.140321	0.098479	1.434	1.235	1.633	0.101	14.145	0	-0.0499	-0.055	-0.045	0.002	-20.542	0	0.4427	0.306	0.579	0.07	6.346	0	0.2903	0.178	0.403	0.057	5.07	0	1.1259	1.019	1.232	0.054	20.7	0	-0.1532
Dental caries	digestive	1.5012	0.149	2.853	0.69	2.176	4.48707	1.16067	17.3397	10	6521	10	8343	0.0295764	0.103314	not_significant	0.651963	1.52906	1.4356	1.237	1.634	0.101	14.164	0	-0.0499	-0.055	-0.045	0.002	-20.583	0	0.4425	0.306	0.579	0.07	6.341	0	0.2914	0.179	0.404	0.057	5.088	0	1.1263	1.02	1.233	0.054	20.703	0	-0.1521
Dependence on respirator [Ventilator] or supplemental oxygen	respiratory	2.0946	1.096	3.093	0.509	4.111	8.12219	2.99217	22.0431	22	6509	10	8343	3.93901e-05	0.000754692	mi_significant	0.909673	4.40461	1.4394	1.241	1.638	0.101	14.185	0	-0.0502	-0.055	-0.045	0.002	-20.646	0	0.4481	0.311	0.585	0.07	6.418	0	0.2935	0.181	0.406	0.057	5.119	0	1.131	1.024	1.238	0.054	20.771	0	-0.1494
Depression		0.2215	-0.095	0.538	0.161	1.372	1.24795	0.909373	1.71258	77	6454	96	8257	0.170108	0.345357	not_significant	0.0961962	0.769275	1.4313	1.233	1.63	0.101	14.13	0	-0.0498	-0.055	-0.045	0.002	-20.561	0	0.4447	0.308	0.581	0.07	6.373	0	0.2905	0.178	0.403	0.057	5.073	0	1.1263	1.02	1.233	0.054	20.708	0	-0.1553
Dermatitis due to solar radiation	dermatologic	-0.3454	-1.297	0.606	0.486	-0.711	0.707937	0.273351	1.83308	10	6521	13	8340	0.47695	0.673922	not_significant	-0.150005	0.321527	1.4319	1.233	1.63	0.101	14.134	0	-0.0498	-0.055	-0.045	0.002	-20.536	0	0.443	0.306	0.58	0.07	6.35	0	0.2903	0.178	0.403	0.057	5.07	0	1.1263	1.02	1.233	0.054	20.706	0	-0.1533
Dermatochalasis	sense organs	0.6517	-0.36	1.664	0.516	1.262	1.9188	0.697676	5.28039	10	6521	10	8343	0.206881	0.394088	not_significant	0.28303	0.684279	1.4393	1.241	1.638	0.101	14.189	0	-0.05	-0.055	-0.045	0.002	-20.586	0	0.4422	0.306	0.579	0.07	6.339	0	0.2893	0.177	0.402	0.057	5.052	0	1.1259	1.019	1.233	0.054	20.699	0	-0.1538
Dermatomycoses	infectious diseases	0.6056	0.164	1.047	0.225	2.688	1.83235	1.17821	2.84909	44	6487	41	8312	0.00718882	0.0374158	mi_significant	0.263009	2.14334	1.4315	1.233	1.63	0.101	14.128	0	-0.0499	-0.055	-0.045	0.002	-20.591	0	0.4479	0.311	0.585	0.07	6.416	0	0.2918	0.179	0.404	0.057	5.093	0	1.1308	1.024	1.238	0.054	20.771	0	-0.1514
Dermatophytosis	infectious diseases	0.0164	-0.683	0.716	0.357	0.046	1.01654	0.505099	2.04623	15	6516	21	8332	0.963458	0.985829	not_significant	0.00712243	0.0161672	1.4329	1.234	1.631	0.101	14.145	0	-0.0498	-0.055	-0.045	0.002	-20.553	0	0.4427	0.306	0.579	0.07	6.346	0	0.2902	0.178	0.402	0.057	5.067	0	1.1258	1.019	1.232	0.054	20.699	0	-0.1534
Dermatophytosis of nail	infectious diseases	0.4066	0.128	0.685	0.142	2.859	1.5017	1.13655	1.98377	104	6427	117	8236	0.00424462	0.0252765	mi_significant	0.176584	2.37216	1.4368	1.238	1.635	0.101	14.178	0	-0.0501	-0.055	-0.045	0.002	-20.649	0	0.4475	0.311	0.584	0.07	6.412	0	0.2933	0.181	0.406	0.057	5.12	0	1.1303	1.024	1.237	0.054	20.766	0	-0.1527
Dermatophytosis of the body	infectious diseases	0.2702	-0.037	0.578	0.157	1.723	1.31023	0.963676	1.78247	80	6451	101	8252	0.0848717	0.214943	not_significant	0.117346	1.07124	1.4327	1.234	1.631	0.101	14.144	0	-0.0499	-0.055	-0.045	0.002	-20.588	0	0.4457	0.309	0.583	0.07	6.387	0	0.2915	0.179	0.404	0.057	5.088	0	1.1282	1.022	1.235	0.054	20.733	0	-0.1537
Develomental delays and disorders	mental disorders	0.3659	-0.796	1.528	0.593	0.617	1.44181	0.45113	4.60895	10	6521	10	8343	0.537054	0.717158	not_significant	0.158908	0.269982	1.4328	1.234	1.631	0.101	14.145	0	-0.0498	-0.055	-0.045	0.002	-20.559	0	0.4434	0.307	0.58	0.07	6.355	0	0.2902	0.178	0.402	0.057	5.067	0	1.1264	1.02	1.233	0.054	20.706	0	-0.1529
Diabetes insipidus	endocrine/metabolic	-0.1849	-2.056	1.687	0.955	-0.194	0.831187	0.127965	5.40325	10	6521	10	8343	0.846429	0.917948	not_significant	-0.080301	0.0724096	1.4331	1.235	1.632	0.101	14.147	0	-0.0498	-0.055	-0.045	0.002	-20.553	0	0.4428	0.306	0.58	0.07	6.347	0	0.2901	0.178	0.402	0.057	5.066	0	1.1258	1.019	1.232	0.054	20.699	0	-0.1534
Diabetes mellitus	endocrine/metabolic	2.3483	1.091	3.605	0.641	3.662	10.4678	2.97725	36.7817	16	6515	10	8343	0.000250178	0.00312015	mi_significant	1.01985	3.60175	1.4464	1.247	1.645	0.101	14.252	0	-0.0502	-0.055	-0.045	0.002	-20.665	0	0.4446	0.308	0.581	0.07	6.371	0	0.2904	0.178	0.403	0.057	5.068	0	1.1246	1.018	1.231	0.054	20.668	0	-0.1556
Diabetes type 1 with peripheral circulatory disorders	endocrine/metabolic	1.3657	-0.983	3.714	1.198	1.14	3.91847	0.374187	41.0175	10	6521	10	8343	0.254423	0.447271	not_significant	0.593116	0.594443	1.4326	1.234	1.631	0.101	14.141	0	-0.0498	-0.055	-0.045	0.002	-20.546	0	0.4427	0.306	0.579	0.07	6.346	0	0.2898	0.178	0.402	0.057	5.06	0	1.1255	1.019	1.232	0.054	20.693	0	-0.154
Diabetes type 2 with peripheral circulatory disorders	endocrine/metabolic	1.7847	1.104	2.465	0.347	5.139	5.95779	3.01621	11.7635	30	6501	13	8340	2.75472e-07	1.65533e-05	mi_significant	0.775085	6.55992	1.4563	1.257	1.655	0.102	14.344	0	-0.0506	-0.055	-0.046	0.002	-20.786	0	0.4455	0.309	0.582	0.07	6.381	0	0.2923	0.18	0.405	0.057	5.101	0	1.1303	1.024	1.237	0.054	20.762	0	-0.1572
Diabetic retinopathy	endocrine/metabolic	1.7549	0.847	2.663	0.463	3.79	5.78287	2.33264	14.3392	22	6509	10	8343	0.000150923	0.0021687	mi_significant	0.762143	3.82124	1.4481	1.249	1.647	0.101	14.275	0	-0.0503	-0.055	-0.046	0.002	-20.718	0	0.4426	0.306	0.579	0.07	6.342	0	0.2922	0.18	0.405	0.057	5.098	0	1.127	1.02	1.234	0.054	20.706	0	-0.1494
Diaphragmatic hernia	digestive	0.3852	-0.009	0.779	0.201	1.917	1.46991	0.99104	2.17929	51	6480	61	8292	0.0552027	0.156718	not_significant	0.16729	1.25804	1.4368	1.238	1.635	0.101	14.184	0	-0.05	-0.055	-0.045	0.002	-20.619	0	0.4438	0.307	0.581	0.07	6.361	0	0.2921	0.18	0.404	0.057	5.099	0	1.1282	1.022	1.235	0.054	20.733	0	-0.1523
Diarrhea	digestive	0.4121	0.209	0.615	0.103	3.985	1.50999	1.23244	1.84966	211	6320	210	8143	6.73946e-05	0.00120399	mi_significant	0.178973	4.17138	1.4215	1.223	1.62	0.101	14.027	0	-0.0499	-0.055	-0.045	0.002	-20.575	0	0.4503	0.313	0.587	0.07	6.45	0	0.2899	0.178	0.402	0.057	5.058	0	1.1329	1.026	1.24	0.054	20.806	0	-0.1542
Difficulty in walking	musculoskeletal	1.0177	0.386	1.65	0.322	3.156	2.76682	1.47108	5.20698	27	6504	19	8334	0.00160178	0.0124562	mi_significant	0.441981	2.7954	1.4491	1.25	1.648	0.101	14.287	0	-0.0503	-0.055	-0.046	0.002	-20.695	0	0.4425	0.306	0.579	0.07	6.341	0	0.2789	0.166	0.391	0.057	4.859	0	1.1256	1.019	1.232	0.054	20.69	0	-0.1534
Digestive congenital anomalies	congenital anomalies	-0.7737	-3.929	2.382	1.61	-0.481	0.461303	0.0196633	10.8265	10	6521	10	8343	0.630813	0.776476	not_significant	-0.336014	0.200099	1.434	1.235	1.633	0.101	14.153	0	-0.0499	-0.055	-0.045	0.002	-20.558	0	0.4427	0.306	0.579	0.07	6.347	0	0.2902	0.178	0.402	0.057	5.068	0	1.126	1.019	1.233	0.054	20.702	0	-0.1532
Diplopia and disorders of binocular vision	sense organs	0.7518	0.025	1.478	0.371	2.029	2.12081	1.02532	4.38417	20	6511	15	8338	0.0425006	0.131923	not_significant	0.326503	1.37161	1.4383	1.24	1.637	0.101	14.194	0	-0.05	-0.055	-0.045	0.002	-20.609	0	0.4426	0.306	0.579	0.07	6.344	0	0.2886	0.176	0.401	0.057	5.038	0	1.1248	1.018	1.231	0.054	20.676	0	-0.1539
Disease of capillaries	circulatory system	0.3076	-0.367	0.982	0.344	0.894	1.36016	0.69281	2.66979	18	6513	20	8333	0.371202	0.578468	not_significant	0.133589	0.43039	1.4336	1.235	1.632	0.101	14.153	0	-0.0499	-0.055	-0.045	0.002	-20.566	0	0.4435	0.307	0.58	0.07	6.356	0	0.2895	0.177	0.402	0.057	5.054	0	1.1259	1.019	1.233	0.054	20.7	0	-0.1533
Disease of tricuspid valve	circulatory system	2.3475	0.784	3.911	0.798	2.943	10.4594	2.19022	49.9489	10	6521	10	8343	0.00324979	0.0212684	mi_significant	1.01951	2.48814	1.4391	1.24	1.638	0.101	14.195	0	-0.05	-0.055	-0.045	0.002	-20.607	0	0.4419	0.305	0.579	0.07	6.333	0	0.2865	0.174	0.399	0.057	5	0	1.1268	1.02	1.233	0.054	20.712	0	-0.1544
Diseases and other conditions of the tongue	digestive	0.0078	-0.731	0.747	0.377	0.021	1.00783	0.481427	2.11066	11	6520	23	8330	0.98348	0.990976	not_significant	0.0033875	0.00723463	1.433	1.234	1.632	0.101	14.143	0	-0.0498	-0.055	-0.045	0.002	-20.54	0	0.4427	0.306	0.579	0.07	6.346	0	0.2902	0.178	0.402	0.057	5.067	0	1.1259	1.019	1.232	0.054	20.696	0	-0.1534
Diseases due to other mycobacteria	infectious diseases	1.0893	-1.747	3.926	1.447	0.753	2.97219	0.174296	50.7038	10	6521	10	8343	0.451572	0.653841	not_significant	0.473077	0.345273	1.4343	1.236	1.633	0.101	14.157	0	-0.0499	-0.055	-0.045	0.002	-20.563	0	0.4421	0.305	0.579	0.07	6.337	0	0.2902	0.178	0.402	0.057	5.068	0	1.1259	1.019	1.233	0.054	20.7	0	-0.1536
Diseases of esophagus	digestive	0.558	-0.447	1.563	0.513	1.088	1.74717	0.639544	4.77312	10	6521	10	8343	0.276562	0.474208	not_significant	0.242336	0.558208	1.4331	1.235	1.632	0.101	14.149	0	-0.0499	-0.055	-0.045	0.002	-20.562	0	0.4431	0.306	0.58	0.07	6.352	0	0.29	0.178	0.402	0.057	5.065	0	1.1261	1.019	1.233	0.054	20.703	0	-0.1534
Diseases of hair and hair follicles	dermatologic	0.0488	-0.238	0.335	0.146	0.334	1.05001	0.788203	1.39794	91	6440	122	8231	0.738339	0.850248	not_significant	0.0211936	0.131744	1.4332	1.235	1.632	0.101	14.147	0	-0.0498	-0.055	-0.045	0.002	-20.554	0	0.4424	0.306	0.579	0.07	6.341	0	0.2895	0.177	0.402	0.057	5.053	0	1.1253	1.019	1.232	0.054	20.683	0	-0.1543
Diseases of lips	digestive	-0.4876	-1.05	0.075	0.287	-1.699	0.614098	0.349938	1.07788	19	6512	43	8310	0.0892799	0.222275	not_significant	-0.211762	1.04925	1.4331	1.235	1.632	0.101	14.147	0	-0.0498	-0.055	-0.045	0.002	-20.542	0	0.4428	0.306	0.58	0.07	6.347	0	0.2912	0.179	0.403	0.057	5.085	0	1.1266	1.02	1.233	0.054	20.709	0	-0.1519
Diseases of nail, NOS	dermatologic	0.7983	0.413	1.184	0.197	4.059	2.22176	1.51135	3.26742	62	6469	54	8299	4.931e-05	0.000918139	mi_significant	0.346697	4.30706	1.4449	1.246	1.644	0.101	14.255	0	-0.0503	-0.055	-0.046	0.002	-20.71	0	0.4429	0.306	0.58	0.07	6.345	0	0.2902	0.178	0.402	0.057	5.064	0	1.1299	1.023	1.237	0.054	20.759	0	-0.1565
Diseases of pancreas	digestive	0.8299	0.018	1.642	0.414	2.003	2.29309	1.01816	5.16549	16	6515	11	8342	0.0452217	0.138067	not_significant	0.360421	1.34465	1.4356	1.237	1.634	0.101	14.166	0	-0.0499	-0.055	-0.045	0.002	-20.583	0	0.4418	0.305	0.579	0.07	6.332	0	0.2902	0.178	0.402	0.057	5.067	0	1.126	1.019	1.233	0.054	20.699	0	-0.1537
Diseases of spleen	hematopoietic	0.4848	-0.732	1.701	0.621	0.781	1.62385	0.480946	5.47942	10	6521	10	8343	0.43479	0.639368	not_significant	0.210546	0.361721	1.4325	1.234	1.631	0.101	14.14	0	-0.0498	-0.055	-0.045	0.002	-20.55	0	0.4416	0.305	0.578	0.07	6.328	0	0.29	0.178	0.402	0.057	5.064	0	1.1262	1.02	1.233	0.054	20.705	0	-0.1532
Diseases of the jaws	digestive	0.101	-0.587	0.789	0.351	0.288	1.10628	0.555993	2.20119	15	6516	21	8332	0.773526	0.869559	not_significant	0.0438637	0.111525	1.4329	1.234	1.631	0.101	14.145	0	-0.0498	-0.055	-0.045	0.002	-20.554	0	0.4427	0.306	0.579	0.07	6.346	0	0.2903	0.178	0.402	0.057	5.068	0	1.126	1.019	1.233	0.054	20.701	0	-0.1534
Diseases of the larynx and vocal cords	respiratory	0.6832	-0.001	1.368	0.349	1.956	1.9802	0.999	3.92749	19	6512	17	8336	0.0504295	0.146523	not_significant	0.29671	1.29732	1.4384	1.24	1.637	0.101	14.191	0	-0.05	-0.055	-0.045	0.002	-20.604	0	0.4442	0.307	0.581	0.07	6.366	0	0.289	0.177	0.401	0.057	5.046	0	1.1259	1.019	1.233	0.054	20.698	0	-0.1537
Diseases of the oral soft tissues, excluding lesions specific for gingiva and tongue	digestive	0.4159	-0.04	0.872	0.233	1.787	1.51573	0.960789	2.39169	40	6491	41	8312	0.0739646	0.192104	not_significant	0.180623	1.13098	1.4335	1.235	1.632	0.101	14.149	0	-0.0499	-0.055	-0.045	0.002	-20.578	0	0.4443	0.308	0.581	0.07	6.369	0	0.2907	0.178	0.403	0.057	5.076	0	1.1268	1.02	1.233	0.054	20.713	0	-0.1536
Diseases of the salivary glands	digestive	1.3498	-0.528	3.227	0.958	1.409	3.85665	0.589783	25.2039	10	6521	10	8343	0.158855	0.332093	not_significant	0.586211	0.799	1.4342	1.236	1.633	0.101	14.159	0	-0.0499	-0.055	-0.045	0.002	-20.567	0	0.4428	0.306	0.579	0.07	6.347	0	0.2902	0.178	0.402	0.057	5.068	0	1.1253	1.019	1.232	0.054	20.688	0	-0.1544
Diseases of white blood cells	hematopoietic	-0.3282	-1.244	0.587	0.467	-0.703	0.720219	0.288229	1.79858	10	6521	14	8339	0.482352	0.678025	not_significant	-0.142535	0.316636	1.4342	1.236	1.633	0.101	14.155	0	-0.0498	-0.055	-0.045	0.002	-20.557	0	0.4427	0.306	0.579	0.07	6.346	0	0.2899	0.178	0.402	0.057	5.062	0	1.1257	1.019	1.232	0.054	20.696	0	-0.1533
Dislocation	injuries & poisonings	0.167	-0.172	0.506	0.173	0.966	1.18175	0.841979	1.65864	68	6463	78	8275	0.333858	0.540404	not_significant	0.0725272	0.476438	1.4308	1.232	1.629	0.101	14.119	0	-0.0498	-0.055	-0.045	0.002	-20.556	0	0.4444	0.308	0.581	0.07	6.368	0	0.2916	0.179	0.404	0.057	5.09	0	1.127	1.02	1.234	0.054	20.715	0	-0.1522
Disorder of skin and subcutaneous tissue NOS	dermatologic	0.172	-0.003	0.347	0.09	1.921	1.18768	0.997004	1.41482	242	6289	336	8017	0.0547028	0.156192	not_significant	0.0746987	1.26199	1.4344	1.236	1.633	0.101	14.156	0	-0.0501	-0.055	-0.045	0.002	-20.62	0	0.4484	0.311	0.585	0.07	6.42	0	0.2914	0.179	0.404	0.057	5.087	0	1.1318	1.025	1.239	0.054	20.77	0	-0.1518
Disorders involving the immune mechanism	endocrine/metabolic	1.7567	0.768	2.745	0.504	3.483	5.79329	2.15545	15.5646	28	6503	10	8343	0.000495713	0.00520106	mi_significant	0.762925	3.30477	1.4307	1.232	1.629	0.101	14.114	0	-0.0498	-0.055	-0.045	0.002	-20.535	0	0.4414	0.305	0.578	0.07	6.324	0	0.2883	0.176	0.401	0.057	5.033	0	1.1221	1.015	1.229	0.054	20.62	0	-0.1534
Disorders of acoustic nerve	sense organs	0.0025	-0.801	0.806	0.41	0.006	1.0025	0.44888	2.23893	12	6519	15	8338	0.99506	0.997123	not_significant	0.00108574	0.00215053	1.433	1.234	1.632	0.101	14.146	0	-0.0498	-0.055	-0.045	0.002	-20.552	0	0.4427	0.306	0.579	0.07	6.346	0	0.2902	0.178	0.402	0.057	5.068	0	1.1258	1.019	1.232	0.054	20.699	0	-0.1534
Disorders of adrenal glands	endocrine/metabolic	1.5417	0.594	2.49	0.484	3.187	4.67253	1.81122	12.0613	17	6514	10	8343	0.00143511	0.0116394	mi_significant	0.669552	2.84311	1.4445	1.246	1.643	0.101	14.239	0	-0.0502	-0.055	-0.045	0.002	-20.659	0	0.4411	0.304	0.578	0.07	6.321	0	0.2921	0.18	0.404	0.057	5.098	0	1.1261	1.019	1.233	0.054	20.694	0	-0.1529
Disorders of bilirubin excretion	endocrine/metabolic	0.5566	-0.007	1.12	0.288	1.934	1.74473	0.993024	3.06485	29	6502	24	8329	0.0530572	0.152482	not_significant	0.241728	1.27526	1.4335	1.235	1.632	0.101	14.147	0	-0.0499	-0.055	-0.045	0.002	-20.571	0	0.4428	0.306	0.58	0.07	6.346	0	0.2904	0.178	0.403	0.057	5.07	0	1.1265	1.02	1.233	0.054	20.708	0	-0.1532
Disorders of calcium/phosphorus metabolism	endocrine/metabolic	0.915	0.049	1.781	0.442	2.072	2.49678	1.05022	5.93579	12	6519	10	8343	0.0382977	0.123186	not_significant	0.397379	1.41683	1.438	1.239	1.637	0.101	14.186	0	-0.05	-0.055	-0.045	0.002	-20.606	0	0.445	0.308	0.582	0.07	6.378	0	0.2896	0.177	0.402	0.057	5.055	0	1.1278	1.021	1.234	0.054	20.728	0	-0.1521
Disorders of coccyx		0.9773	-0.03	1.984	0.514	1.902	2.65727	0.970446	7.27177	14	6517	10	8343	0.0571626	0.160104	not_significant	0.424436	1.24289	1.4306	1.232	1.629	0.101	14.122	0	-0.0498	-0.055	-0.045	0.002	-20.54	0	0.4438	0.307	0.581	0.07	6.362	0	0.2894	0.177	0.402	0.057	5.053	0	1.1253	1.019	1.232	0.054	20.687	0	-0.1533
Disorders of conjunctiva	sense organs	0.4192	-0.071	0.909	0.25	1.678	1.52074	0.931462	2.48184	32	6499	41	8312	0.0934035	0.227402	not_significant	0.182056	1.02964	1.4402	1.241	1.639	0.101	14.203	0	-0.0501	-0.055	-0.045	0.002	-20.612	0	0.4426	0.306	0.579	0.07	6.345	0	0.2908	0.179	0.403	0.057	5.078	0	1.1266	1.02	1.233	0.054	20.709	0	-0.1539
Disorders of diaphragm	respiratory	0.9129	0.127	1.699	0.401	2.276	2.49154	1.13542	5.46848	17	6514	11	8342	0.0228424	0.0865804	not_significant	0.396467	1.64126	1.4343	1.236	1.633	0.101	14.154	0	-0.0499	-0.055	-0.045	0.002	-20.575	0	0.4446	0.308	0.581	0.07	6.372	0	0.2896	0.177	0.402	0.057	5.055	0	1.1267	1.02	1.233	0.054	20.709	0	-0.1537
Disorders of esophageal motility	digestive	0.6616	-0.21	1.534	0.445	1.487	1.93789	0.810584	4.63669	11	6520	12	8341	0.137032	0.298446	not_significant	0.287329	0.863177	1.4352	1.237	1.634	0.101	14.167	0	-0.0499	-0.055	-0.045	0.002	-20.584	0	0.4437	0.307	0.58	0.07	6.36	0	0.2905	0.178	0.403	0.057	5.072	0	1.1269	1.02	1.234	0.054	20.715	0	-0.1532
Disorders of external ear	sense organs	0.3897	-0.151	0.93	0.276	1.413	1.47654	0.859848	2.53451	26	6505	30	8323	0.15765	0.331341	not_significant	0.169245	0.802305	1.435	1.236	1.634	0.101	14.162	0	-0.0499	-0.055	-0.045	0.002	-20.577	0	0.4429	0.306	0.58	0.07	6.348	0	0.2897	0.177	0.402	0.057	5.059	0	1.1268	1.02	1.233	0.054	20.714	0	-0.1535
Disorders of iris and ciliary body	sense organs	0.3591	-1.246	1.964	0.819	0.439	1.43204	0.287653	7.12778	10	6521	10	8343	0.660977	0.793653	not_significant	0.155955	0.179814	1.4337	1.235	1.632	0.101	14.151	0	-0.0499	-0.055	-0.045	0.002	-20.557	0	0.4424	0.306	0.579	0.07	6.341	0	0.2902	0.178	0.402	0.057	5.068	0	1.1259	1.019	1.232	0.054	20.7	0	-0.1533
Disorders of iron metabolism	hematopoietic	1.0444	0.199	1.89	0.431	2.421	2.84169	1.22018	6.61937	17	6514	10	8343	0.0154881	0.065626	not_significant	0.453577	1.81	1.4353	1.237	1.634	0.101	14.166	0	-0.0499	-0.055	-0.045	0.002	-20.587	0	0.44	0.303	0.577	0.07	6.306	0	0.2898	0.178	0.402	0.057	5.06	0	1.1265	1.02	1.233	0.054	20.706	0	-0.153
Disorders of lacrimal system	sense organs	0.5311	-1.575	2.637	1.075	0.494	1.7008	0.207008	13.9712	10	6521	10	8343	0.621112	0.773174	not_significant	0.230654	0.20683	1.433	1.234	1.632	0.101	14.146	0	-0.0498	-0.055	-0.045	0.002	-20.556	0	0.4431	0.306	0.58	0.07	6.352	0	0.2906	0.178	0.403	0.057	5.074	0	1.1261	1.02	1.233	0.054	20.703	0	-0.153
Disorders of magnesium metabolism	endocrine/metabolic	1.7068	0.918	2.495	0.402	4.243	5.5113	2.50428	12.1217	30	6501	10	8343	2.20464e-05	0.000470087	mi_significant	0.741254	4.65666	1.4415	1.243	1.64	0.101	14.213	0	-0.0502	-0.055	-0.045	0.002	-20.651	0	0.437	0.3	0.574	0.07	6.258	0	0.2911	0.179	0.403	0.057	5.081	0	1.127	1.02	1.234	0.054	20.706	0	-0.1527
Disorders of mineral metabolism	endocrine/metabolic	0.766	-0.44	1.972	0.615	1.245	2.15114	0.644036	7.18503	10	6521	10	8343	0.213278	0.401643	not_significant	0.33267	0.671054	1.4376	1.239	1.636	0.101	14.18	0	-0.05	-0.055	-0.045	0.002	-20.582	0	0.4429	0.306	0.58	0.07	6.348	0	0.2889	0.177	0.401	0.057	5.044	0	1.1254	1.019	1.232	0.054	20.69	0	-0.1538
Disorders of muscle, ligament, and fascia	musculoskeletal	-0.0304	-0.863	0.802	0.425	-0.072	0.970057	0.421894	2.23	10	6521	17	8336	0.94287	0.976992	not_significant	-0.0132026	0.0255481	1.4329	1.234	1.631	0.101	14.144	0	-0.0498	-0.055	-0.045	0.002	-20.543	0	0.4427	0.306	0.579	0.07	6.345	0	0.2901	0.178	0.402	0.057	5.066	0	1.1258	1.019	1.232	0.054	20.694	0	-0.1534
Disorders of optic nerve and visual pathways	sense organs	0.321	-0.726	1.368	0.534	0.601	1.37851	0.48384	3.92749	10	6521	10	8343	0.547698	0.721891	not_significant	0.139409	0.261459	1.4335	1.235	1.632	0.101	14.15	0	-0.0499	-0.055	-0.045	0.002	-20.557	0	0.4422	0.305	0.579	0.07	6.338	0	0.2901	0.178	0.402	0.057	5.065	0	1.1259	1.019	1.233	0.054	20.701	0	-0.1534
Disorders of penis	genitourinary	-0.0234	-0.401	0.355	0.193	-0.121	0.976872	0.66965	1.42618	49	6482	72	8281	0.903465	0.94931	not_significant	-0.0101625	0.0440886	1.4332	1.235	1.632	0.101	14.146	0	-0.0498	-0.055	-0.045	0.002	-20.552	0	0.4427	0.306	0.579	0.07	6.346	0	0.2902	0.178	0.402	0.057	5.067	0	1.1257	1.019	1.232	0.054	20.696	0	-0.1534
Disorders of phosphorus metabolism	endocrine/metabolic	2.1632	1.327	2.999	0.427	5.071	8.69893	3.76972	20.0655	38	6493	10	8343	3.9654e-07	2.18427e-05	mi_significant	0.939466	6.40171	1.4463	1.247	1.645	0.102	14.239	0	-0.0503	-0.055	-0.046	0.002	-20.69	0	0.4441	0.307	0.581	0.07	6.356	0	0.2872	0.175	0.4	0.057	5.007	0	1.1274	1.021	1.234	0.054	20.705	0	-0.1503
Disorders of refraction and accommodation; blindness and low vision	sense organs	0.3877	-0.242	1.017	0.321	1.208	1.47359	0.785056	2.76489	18	6513	26	8327	0.227183	0.415169	not_significant	0.168376	0.643625	1.4357	1.237	1.634	0.101	14.169	0	-0.0499	-0.055	-0.045	0.002	-20.579	0	0.4433	0.307	0.58	0.07	6.354	0	0.2899	0.178	0.402	0.057	5.063	0	1.126	1.019	1.233	0.054	20.702	0	-0.1551
Disorders of sacrum	musculoskeletal	0.1575	-0.387	0.702	0.278	0.567	1.17058	0.679091	2.01778	26	6505	32	8321	0.570558	0.7359	not_significant	0.0684014	0.2437	1.4336	1.235	1.632	0.101	14.152	0	-0.0499	-0.055	-0.045	0.002	-20.561	0	0.4429	0.306	0.58	0.07	6.349	0	0.29	0.178	0.402	0.057	5.064	0	1.1258	1.019	1.232	0.054	20.699	0	-0.1533
Disorders of sweat glands	dermatologic	-0.0333	-1.227	1.16	0.609	-0.055	0.967248	0.293171	3.18993	10	6521	10	8343	0.956443	0.982454	not_significant	-0.014462	0.0193409	1.433	1.234	1.632	0.101	14.145	0	-0.0498	-0.055	-0.045	0.002	-20.551	0	0.4427	0.306	0.579	0.07	6.346	0	0.2902	0.178	0.402	0.057	5.068	0	1.1258	1.019	1.232	0.054	20.699	0	-0.1534
Disorders of the autonomic nervous system	neurological	1.6943	0	3.388	0.864	1.96	5.44283	1	29.6067	10	6521	10	8343	0.0499637	0.14581	not_significant	0.735825	1.30135	1.4322	1.234	1.631	0.101	14.138	0	-0.0498	-0.055	-0.045	0.002	-20.558	0	0.4439	0.307	0.581	0.07	6.362	0	0.2907	0.178	0.403	0.057	5.076	0	1.1266	1.02	1.233	0.054	20.71	0	-0.1536
Disorders of the orbit	sense organs	-0.6052	-2.255	1.045	0.842	-0.719	0.545965	0.104874	2.8434	10	6521	10	8343	0.472192	0.670883	not_significant	-0.262835	0.325882	1.4326	1.234	1.631	0.101	14.143	0	-0.0498	-0.055	-0.045	0.002	-20.55	0	0.4441	0.307	0.581	0.07	6.363	0	0.2909	0.179	0.403	0.057	5.079	0	1.1258	1.019	1.232	0.054	20.699	0	-0.1533
Disorders of the pituitary gland and its hypothalamic control	endocrine/metabolic	1.217	0.18	2.254	0.529	2.301	3.37704	1.19722	9.52576	17	6514	10	8343	0.0214181	0.0825503	not_significant	0.528536	1.66922	1.4274	1.229	1.626	0.101	14.086	0	-0.0497	-0.054	-0.045	0.002	-20.49	0	0.4386	0.302	0.575	0.07	6.285	0	0.2889	0.177	0.401	0.057	5.044	0	1.1246	1.018	1.231	0.054	20.676	0	-0.1547
Disorders of vitreous body	sense organs	0.5665	0.173	0.96	0.201	2.825	1.76209	1.18887	2.6117	53	6478	59	8294	0.00473124	0.0273131	mi_significant	0.246028	2.32502	1.449	1.25	1.648	0.101	14.276	0	-0.0503	-0.055	-0.046	0.002	-20.689	0	0.4381	0.301	0.575	0.07	6.277	0	0.2903	0.178	0.403	0.057	5.067	0	1.1273	1.021	1.234	0.054	20.717	0	-0.1547
Displacement of intervertebral disc	musculoskeletal	0.0312	-0.228	0.291	0.132	0.236	1.03169	0.796124	1.33776	103	6428	161	8192	0.813441	0.894357	not_significant	0.01355	0.0896739	1.4334	1.235	1.632	0.101	14.148	0	-0.0499	-0.055	-0.045	0.002	-20.547	0	0.4428	0.306	0.58	0.07	6.347	0	0.29	0.178	0.402	0.057	5.063	0	1.1259	1.019	1.233	0.054	20.7	0	-0.1537
Disturbance of salivary secretion	digestive	0.1762	-0.562	0.915	0.377	0.468	1.19268	0.570068	2.49678	12	6519	22	8331	0.639992	0.782551	not_significant	0.0765227	0.193825	1.434	1.235	1.633	0.101	14.153	0	-0.0499	-0.055	-0.045	0.002	-20.559	0	0.4429	0.306	0.58	0.07	6.349	0	0.2902	0.178	0.402	0.057	5.068	0	1.126	1.019	1.233	0.054	20.701	0	-0.1539
Disturbance of skin sensation	dermatologic	0.0345	-0.166	0.235	0.102	0.337	1.0351	0.847046	1.26491	177	6354	268	8085	0.736244	0.850056	not_significant	0.0149832	0.132978	1.4328	1.234	1.631	0.101	14.143	0	-0.0499	-0.055	-0.045	0.002	-20.549	0	0.4437	0.307	0.581	0.07	6.355	0	0.2908	0.178	0.403	0.057	5.075	0	1.1267	1.02	1.233	0.054	20.692	0	-0.1531
Disturbances of sensation of smell and taste	neurological	0.2771	-0.202	0.756	0.245	1.133	1.3193	0.817095	2.12974	31	6500	41	8312	0.257271	0.448451	not_significant	0.120343	0.58961	1.4327	1.234	1.631	0.101	14.142	0	-0.0499	-0.055	-0.045	0.002	-20.566	0	0.4427	0.306	0.579	0.07	6.347	0	0.2908	0.179	0.403	0.057	5.078	0	1.1276	1.021	1.234	0.054	20.722	0	-0.1533
Disturbances of sulphur-bearing amino-acid metabolism	endocrine/metabolic	0.8579	-0.305	2.021	0.594	1.445	2.3582	0.737123	7.54587	10	6521	10	8343	0.148339	0.317652	not_significant	0.372581	0.828745	1.4329	1.234	1.631	0.101	14.144	0	-0.0499	-0.055	-0.045	0.002	-20.572	0	0.4445	0.308	0.581	0.07	6.37	0	0.2916	0.179	0.404	0.057	5.09	0	1.1281	1.021	1.235	0.054	20.73	0	-0.1509
Diverticulitis	digestive	-0.0686	-0.619	0.482	0.281	-0.244	0.9337	0.538483	1.61931	21	6510	38	8315	0.80692	0.89193	not_significant	-0.0297926	0.0931696	1.4328	1.234	1.631	0.101	14.143	0	-0.0498	-0.055	-0.045	0.002	-20.542	0	0.4426	0.306	0.579	0.07	6.344	0	0.2901	0.178	0.402	0.057	5.066	0	1.1257	1.019	1.232	0.054	20.695	0	-0.1533
Diverticulosis	digestive	0.0107	-0.238	0.259	0.127	0.084	1.01076	0.788203	1.29563	104	6427	201	8152	0.932927	0.970175	not_significant	0.00464695	0.0301523	1.4337	1.234	1.633	0.102	14.098	0	-0.0499	-0.055	-0.045	0.002	-20.407	0	0.4428	0.306	0.579	0.07	6.347	0	0.2903	0.178	0.402	0.057	5.068	0	1.126	1.019	1.233	0.054	20.695	0	-0.1534
Dizziness and giddiness (Light-headedness and vertigo)	sense organs	0.3962	0.198	0.594	0.101	3.922	1.48617	1.21896	1.81122	212	6319	229	8124	8.78449e-05	0.00141623	mi_significant	0.172067	4.05628	1.4349	1.236	1.634	0.101	14.155	0	-0.0502	-0.055	-0.045	0.002	-20.672	0	0.45	0.313	0.587	0.07	6.445	0	0.2914	0.179	0.404	0.057	5.086	0	1.1313	1.025	1.238	0.054	20.78	0	-0.1563
Drusen (degenerative) of retina	sense organs	0.9912	0.025	1.957	0.493	2.011	2.69447	1.02532	7.07806	10	6521	10	8343	0.0442836	0.136146	not_significant	0.430473	1.35376	1.4414	1.243	1.64	0.101	14.213	0	-0.0501	-0.055	-0.045	0.002	-20.621	0	0.4408	0.304	0.578	0.07	6.316	0	0.2912	0.179	0.403	0.057	5.083	0	1.1275	1.021	1.234	0.054	20.724	0	-0.1525
Dry eyes	sense organs	0.8384	0.491	1.186	0.177	4.731	2.31266	1.63395	3.27396	78	6453	67	8286	2.23912e-06	8.24132e-05	mi_significant	0.364112	5.64992	1.4564	1.258	1.655	0.101	14.356	0	-0.0506	-0.055	-0.046	0.002	-20.821	0	0.4302	0.293	0.567	0.07	6.16	0	0.2924	0.18	0.405	0.057	5.102	0	1.1319	1.025	1.239	0.054	20.788	0	-0.1548
Duodenal ulcer	digestive	-0.2482	-1.662	1.166	0.722	-0.344	0.780204	0.189759	3.20913	10	6521	10	8343	0.730817	0.847454	not_significant	-0.107792	0.136191	1.4333	1.235	1.632	0.101	14.148	0	-0.0498	-0.055	-0.045	0.002	-20.554	0	0.4426	0.306	0.579	0.07	6.345	0	0.2901	0.178	0.402	0.057	5.066	0	1.1258	1.019	1.232	0.054	20.699	0	-0.1531
Duodenitis	digestive	0.2721	-0.431	0.975	0.359	0.759	1.31272	0.649859	2.65117	17	6514	18	8335	0.448128	0.650301	not_significant	0.118172	0.348598	1.4337	1.235	1.632	0.101	14.152	0	-0.0499	-0.055	-0.045	0.002	-20.563	0	0.4434	0.307	0.58	0.07	6.355	0	0.2909	0.179	0.403	0.057	5.078	0	1.1257	1.019	1.232	0.054	20.696	0	-0.153
Dyshidrosis	dermatologic	0.2329	-0.409	0.875	0.328	0.711	1.26226	0.664314	2.39888	19	6512	21	8332	0.477149	0.673922	not_significant	0.101147	0.321346	1.4317	1.233	1.63	0.101	14.132	0	-0.0498	-0.055	-0.045	0.002	-20.554	0	0.4437	0.307	0.58	0.07	6.359	0	0.2908	0.179	0.403	0.057	5.077	0	1.1268	1.02	1.233	0.054	20.71	0	-0.1525
Dysmetabolic syndrome X	endocrine/metabolic	0.8073	0.136	1.478	0.342	2.357	2.24185	1.14568	4.38417	22	6509	16	8337	0.0184022	0.0746248	not_significant	0.350606	1.73513	1.4346	1.236	1.633	0.101	14.158	0	-0.0499	-0.055	-0.045	0.002	-20.585	0	0.444	0.307	0.581	0.07	6.364	0	0.2896	0.177	0.402	0.057	5.055	0	1.127	1.02	1.234	0.054	20.715	0	-0.1534
Dyspepsia and other specified disorders of function of stomach	digestive	0.5923	0.241	0.944	0.179	3.304	1.80814	1.27252	2.57024	71	6460	66	8287	0.000953317	0.0084019	mi_significant	0.257233	3.02076	1.4346	1.236	1.633	0.101	14.16	0	-0.05	-0.055	-0.045	0.002	-20.619	0	0.4451	0.308	0.582	0.07	6.378	0	0.291	0.179	0.403	0.057	5.079	0	1.1285	1.022	1.235	0.054	20.739	0	-0.156
Dysphagia	digestive	0.3025	0.021	0.584	0.143	2.108	1.35324	1.02122	1.7932	101	6430	121	8232	0.0350097	0.115673	not_significant	0.131374	1.45581	1.4364	1.238	1.635	0.101	14.178	0	-0.0501	-0.055	-0.045	0.002	-20.622	0	0.4456	0.309	0.582	0.07	6.385	0	0.2914	0.179	0.404	0.057	5.087	0	1.1278	1.021	1.234	0.054	20.727	0	-0.1535
Dysthymic disorder	mental disorders	0.0428	-0.287	0.372	0.168	0.255	1.04373	0.750512	1.45063	70	6461	88	8265	0.799088	0.884752	not_significant	0.0185878	0.0974056	1.4321	1.233	1.631	0.101	14.129	0	-0.0498	-0.055	-0.045	0.002	-20.553	0	0.4437	0.307	0.581	0.07	6.351	0	0.2906	0.178	0.403	0.057	5.073	0	1.1265	1.02	1.233	0.054	20.689	0	-0.1526
Dysuria	genitourinary	0.4835	0.198	0.769	0.146	3.32	1.62174	1.21896	2.15761	105	6426	102	8251	0.000899816	0.00826081	mi_significant	0.209981	3.04585	1.4281	1.229	1.627	0.101	14.092	0	-0.05	-0.055	-0.045	0.002	-20.593	0	0.4482	0.311	0.585	0.07	6.421	0	0.2937	0.181	0.406	0.057	5.125	0	1.1321	1.025	1.239	0.054	20.793	0	-0.1522
E. coli	infectious diseases	1.3333	0.386	2.28	0.483	2.76	3.79354	1.47108	9.77668	13	6518	10	8343	0.00578395	0.0323999	mi_significant	0.579045	2.23778	1.4443	1.245	1.643	0.101	14.24	0	-0.0502	-0.055	-0.045	0.002	-20.658	0	0.444	0.307	0.581	0.07	6.363	0	0.2905	0.178	0.403	0.057	5.07	0	1.1265	1.02	1.233	0.054	20.707	0	-0.1527
Eating disorder	mental disorders	0.3115	-1.516	2.139	0.932	0.334	1.36547	0.219588	8.49094	10	6521	10	8343	0.738293	0.850248	not_significant	0.135283	0.131771	1.4331	1.235	1.632	0.101	14.147	0	-0.0498	-0.055	-0.045	0.002	-20.554	0	0.4427	0.306	0.579	0.07	6.346	0	0.2901	0.178	0.402	0.057	5.065	0	1.1258	1.019	1.232	0.054	20.699	0	-0.1536
Ectropion or entropion	sense organs	2.1238	-0.386	4.634	1.281	1.658	8.36286	0.679771	102.925	10	6521	10	8343	0.0972293	0.232017	not_significant	0.922355	1.0122	1.4376	1.239	1.636	0.101	14.184	0	-0.05	-0.055	-0.045	0.002	-20.589	0	0.4429	0.306	0.58	0.07	6.348	0	0.2896	0.177	0.402	0.057	5.056	0	1.1261	1.019	1.233	0.054	20.702	0	-0.154
Edema	symptoms	0.5627	0.28	0.845	0.144	3.902	1.75541	1.32313	2.32798	103	6428	111	8242	9.53945e-05	0.00151291	mi_significant	0.244378	4.02048	1.4448	1.246	1.644	0.101	14.245	0	-0.0504	-0.055	-0.046	0.002	-20.74	0	0.4502	0.313	0.587	0.07	6.448	0	0.2945	0.182	0.407	0.057	5.139	0	1.1346	1.028	1.241	0.054	20.831	0	-0.1517
Effects of heat, cold and air pressure		-0.2275	-0.944	0.489	0.365	-0.622	0.796522	0.389068	1.63068	12	6519	24	8329	0.533686	0.714825	not_significant	-0.098802	0.272714	1.4331	1.235	1.632	0.101	14.147	0	-0.0498	-0.055	-0.045	0.002	-20.544	0	0.4419	0.305	0.579	0.07	6.333	0	0.2901	0.178	0.402	0.057	5.066	0	1.1253	1.019	1.232	0.054	20.686	0	-0.1537
Effects of other external causes		0.1957	-0.028	0.42	0.114	1.712	1.21616	0.972388	1.52196	159	6372	188	8165	0.0868972	0.218399	not_significant	0.0849914	1.06099	1.4339	1.235	1.632	0.101	14.155	0	-0.05	-0.055	-0.045	0.002	-20.601	0	0.4454	0.309	0.582	0.07	6.383	0	0.2891	0.177	0.401	0.057	5.048	0	1.1269	1.02	1.233	0.054	20.715	0	-0.1524
Effects radiation NOS	injuries & poisonings	1.2312	0.647	1.816	0.298	4.129	3.42534	1.9098	6.14722	42	6489	20	8333	3.6382e-05	0.000717866	mi_significant	0.534703	4.43911	1.4412	1.243	1.64	0.101	14.222	0	-0.0501	-0.055	-0.045	0.002	-20.657	0	0.4441	0.307	0.581	0.07	6.363	0	0.2888	0.177	0.401	0.057	5.041	0	1.1242	1.018	1.231	0.054	20.653	0	-0.1562
Electrolyte imbalance	endocrine/metabolic	1.6779	0.715	2.64	0.491	3.417	5.3543	2.04419	14.0132	14	6517	10	8343	0.000633589	0.00632406	mi_significant	0.728703	3.19819	1.4465	1.248	1.645	0.101	14.268	0	-0.0503	-0.055	-0.045	0.002	-20.697	0	0.4435	0.307	0.58	0.07	6.355	0	0.2889	0.177	0.401	0.057	5.043	0	1.1287	1.022	1.235	0.054	20.741	0	-0.1527
Elevated blood pressure reading without diagnosis of hypertension	circulatory system	-0.0914	-0.255	0.073	0.084	-1.092	0.912653	0.774916	1.07573	258	6273	425	7928	0.274881	0.471938	not_significant	-0.0396945	0.560856	1.4345	1.236	1.633	0.101	14.161	0	-0.0498	-0.055	-0.045	0.002	-20.516	0	0.4399	0.303	0.577	0.07	6.302	0	0.2914	0.179	0.404	0.057	5.088	0	1.1235	1.017	1.23	0.054	20.642	0	-0.1531
Elevated C-reactive protein (CRP)	symptoms	1.5021	0.612	2.392	0.454	3.309	4.49111	1.84412	10.9353	17	6514	10	8343	0.0009363	0.0084019	mi_significant	0.652354	3.02859	1.4416	1.243	1.64	0.101	14.222	0	-0.0501	-0.055	-0.045	0.002	-20.65	0	0.4413	0.305	0.578	0.07	6.323	0	0.2878	0.175	0.4	0.057	5.022	0	1.1283	1.022	1.235	0.054	20.734	0	-0.1528
Elevated prostate specific antigen [PSA]	genitourinary	0.1902	-0.231	0.611	0.215	0.885	1.20949	0.793739	1.84227	37	6494	69	8284	0.376014	0.582073	not_significant	0.0826028	0.424796	1.4411	1.242	1.641	0.102	14.165	0	-0.0501	-0.055	-0.045	0.002	-20.522	0	0.4424	0.306	0.579	0.07	6.342	0	0.2898	0.178	0.402	0.057	5.061	0	1.126	1.019	1.233	0.054	20.701	0	-0.1538
Elevated sedimentation rate	symptoms	1.3435	0.275	2.412	0.545	2.464	3.83243	1.31653	11.1563	11	6520	10	8343	0.0137568	0.0600213	not_significant	0.583475	1.86148	1.4319	1.233	1.63	0.101	14.132	0	-0.0498	-0.055	-0.045	0.002	-20.547	0	0.4427	0.306	0.579	0.07	6.346	0	0.2908	0.179	0.403	0.057	5.077	0	1.1265	1.02	1.233	0.054	20.71	0	-0.1557
Elevated white blood cell count	hematopoietic	0.4419	0.092	0.791	0.178	2.478	1.55566	1.09636	2.2056	67	6464	72	8281	0.0132017	0.0583702	not_significant	0.191915	1.87937	1.4349	1.236	1.633	0.101	14.163	0	-0.05	-0.055	-0.045	0.002	-20.603	0	0.443	0.306	0.58	0.07	6.35	0	0.2898	0.178	0.402	0.057	5.059	0	1.1277	1.021	1.234	0.054	20.727	0	-0.1556
Emphysema	respiratory	1.1283	0.125	2.132	0.512	2.203	3.0904	1.13315	8.43171	10	6521	10	8343	0.0275626	0.0995567	not_significant	0.490014	1.55968	1.4422	1.243	1.641	0.101	14.221	0	-0.0501	-0.055	-0.045	0.002	-20.63	0	0.4426	0.306	0.579	0.07	6.343	0	0.2893	0.177	0.402	0.057	5.052	0	1.1271	1.021	1.234	0.054	20.719	0	-0.1531
Empyema and pneumothorax	respiratory	0.8991	-0.07	1.868	0.494	1.819	2.45739	0.932394	6.47533	13	6518	10	8343	0.0689442	0.182654	not_significant	0.390474	1.1615	1.4331	1.235	1.632	0.101	14.146	0	-0.0499	-0.055	-0.045	0.002	-20.563	0	0.443	0.306	0.58	0.07	6.35	0	0.2906	0.178	0.403	0.057	5.074	0	1.1258	1.019	1.232	0.054	20.696	0	-0.154
Encephalitis, non-infectious	neurological	0.252	-1.481	1.985	0.884	0.285	1.2866	0.22741	7.27905	10	6521	10	8343	0.775645	0.87046	not_significant	0.109442	0.110337	1.4325	1.234	1.631	0.101	14.139	0	-0.0498	-0.055	-0.045	0.002	-20.547	0	0.4428	0.306	0.58	0.07	6.348	0	0.2903	0.178	0.403	0.057	5.069	0	1.1257	1.019	1.232	0.054	20.697	0	-0.1534
Encephalopathy, not elsewhere classified	neurological	1.3542	0.484	2.224	0.444	3.051	3.87366	1.62255	9.24423	18	6513	10	8343	0.00228449	0.0164542	mi_significant	0.588122	2.64121	1.4447	1.246	1.644	0.101	14.241	0	-0.0502	-0.055	-0.045	0.002	-20.666	0	0.4412	0.304	0.578	0.07	6.322	0	0.2919	0.18	0.404	0.057	5.095	0	1.127	1.02	1.234	0.054	20.711	0	-0.1514
Encounter for long-term (current) use of antibiotics		0.9408	0.042	1.84	0.459	2.051	2.56203	1.04289	6.29654	12	6519	10	8343	0.0402448	0.128511	not_significant	0.408584	1.39529	1.4374	1.239	1.636	0.101	14.187	0	-0.05	-0.055	-0.045	0.002	-20.598	0	0.4432	0.306	0.58	0.07	6.353	0	0.2854	0.173	0.398	0.057	4.979	0	1.1264	1.02	1.233	0.054	20.708	0	-0.1539
Encounter for long-term (current) use of anticoagulants		1.671	0.804	2.538	0.443	3.776	5.31748	2.23446	12.6543	17	6514	10	8343	0.000159295	0.00226438	mi_significant	0.725706	3.7978	1.4577	1.259	1.657	0.102	14.349	0	-0.0506	-0.055	-0.046	0.002	-20.767	0	0.4417	0.305	0.578	0.07	6.329	0	0.2889	0.177	0.401	0.057	5.042	0	1.1286	1.022	1.235	0.054	20.735	0	-0.1509
End stage renal disease	genitourinary	1.8488	0.697	3.001	0.588	3.145	6.35219	2.00772	20.1056	17	6514	10	8343	0.00165875	0.0127492	mi_significant	0.802924	2.78022	1.437	1.238	1.636	0.101	14.173	0	-0.05	-0.055	-0.045	0.002	-20.603	0	0.4454	0.309	0.582	0.07	6.383	0	0.2909	0.179	0.403	0.057	5.077	0	1.1255	1.019	1.232	0.054	20.684	0	-0.1526
Endocarditis	circulatory system	1.9596	-0.353	4.272	1.18	1.661	7.09649	0.702577	71.6648	10	6521	10	8343	0.0967884	0.231621	not_significant	0.851043	1.01418	1.4358	1.237	1.634	0.101	14.165	0	-0.0499	-0.055	-0.045	0.002	-20.568	0	0.4404	0.304	0.577	0.07	6.311	0	0.2889	0.177	0.401	0.057	5.044	0	1.1255	1.019	1.232	0.054	20.692	0	-0.1533
Enthesopathy	musculoskeletal	-0.0959	-0.287	0.096	0.098	-0.982	0.908555	0.750512	1.10076	189	6342	315	8038	0.326209	0.533724	not_significant	-0.0416488	0.486504	1.4315	1.233	1.63	0.101	14.131	0	-0.0497	-0.054	-0.045	0.002	-20.473	0	0.4408	0.304	0.578	0.07	6.316	0	0.2899	0.178	0.402	0.057	5.062	0	1.1248	1.018	1.231	0.054	20.677	0	-0.1535
Eosinophilia	hematopoietic	0.7586	-0.424	1.942	0.604	1.257	2.13528	0.654424	6.97268	10	6521	10	8343	0.208817	0.396063	not_significant	0.329456	0.680235	1.436	1.237	1.635	0.101	14.169	0	-0.0499	-0.055	-0.045	0.002	-20.573	0	0.4422	0.305	0.579	0.07	6.339	0	0.29	0.178	0.402	0.057	5.063	0	1.1249	1.018	1.231	0.054	20.68	0	-0.1541
Eosinophilic esophagitis	digestive	0.0273	-0.648	0.702	0.344	0.079	1.02768	0.523091	2.01778	17	6514	22	8331	0.936868	0.97293	not_significant	0.0118562	0.0283214	1.433	1.234	1.632	0.101	14.146	0	-0.0498	-0.055	-0.045	0.002	-20.553	0	0.4427	0.306	0.579	0.07	6.346	0	0.2902	0.178	0.402	0.057	5.068	0	1.1258	1.019	1.232	0.054	20.699	0	-0.1534
Epilepsy	neurological	1.2749	-0.038	2.588	0.67	1.904	3.57834	0.962713	13.3031	11	6520	10	8343	0.0569632	0.159884	not_significant	0.553682	1.24441	1.4299	1.231	1.629	0.101	14.112	0	-0.0498	-0.055	-0.045	0.002	-20.526	0	0.4421	0.305	0.579	0.07	6.336	0	0.2888	0.177	0.401	0.057	5.042	0	1.1255	1.019	1.232	0.054	20.69	0	-0.1528
Epilepsy, recurrent seizures, convulsions	neurological	2.0243	1.019	3.03	0.513	3.945	7.57081	2.77042	20.6972	25	6506	10	8343	7.98808e-05	0.00131707	mi_significant	0.879142	4.09756	1.4376	1.239	1.636	0.101	14.178	0	-0.05	-0.055	-0.045	0.002	-20.616	0	0.4438	0.307	0.581	0.07	6.358	0	0.29	0.178	0.402	0.057	5.06	0	1.1257	1.019	1.232	0.054	20.68	0	-0.1525
Epiphora	sense organs	0.8873	-0.138	1.913	0.523	1.696	2.42856	0.871099	6.77338	10	6521	10	8343	0.0899789	0.222366	not_significant	0.385349	1.04586	1.4376	1.239	1.636	0.101	14.187	0	-0.05	-0.055	-0.045	0.002	-20.596	0	0.4428	0.306	0.58	0.07	6.347	0	0.2893	0.177	0.402	0.057	5.051	0	1.1262	1.02	1.233	0.054	20.703	0	-0.1545
Epistaxis or throat hemorrhage	respiratory	0.5907	0.161	1.02	0.219	2.697	1.80525	1.17468	2.77319	50	6481	43	8310	0.00699493	0.0366956	mi_significant	0.256538	2.15522	1.4321	1.234	1.631	0.101	14.135	0	-0.0499	-0.055	-0.045	0.002	-20.583	0	0.4453	0.309	0.582	0.07	6.381	0	0.2913	0.179	0.404	0.057	5.085	0	1.128	1.021	1.235	0.054	20.73	0	-0.1537
Erectile dysfunction [ED]	genitourinary	0.3076	0.122	0.493	0.095	3.249	1.36016	1.12975	1.63722	228	6303	284	8069	0.00115995	0.00982986	mi_significant	0.133589	2.93556	1.4438	1.245	1.643	0.101	14.233	0	-0.0505	-0.055	-0.046	0.002	-20.717	0	0.4497	0.313	0.587	0.07	6.441	0	0.2942	0.182	0.407	0.057	5.134	0	1.1332	1.026	1.24	0.054	20.805	0	-0.1517
Esophageal bleeding (varices/hemorrhage)	digestive	0.3389	-0.401	1.078	0.377	0.898	1.4034	0.66965	2.9388	13	6518	17	8336	0.369157	0.577545	not_significant	0.147182	0.432789	1.4337	1.235	1.632	0.101	14.151	0	-0.0499	-0.055	-0.045	0.002	-20.565	0	0.4434	0.307	0.58	0.07	6.355	0	0.2901	0.178	0.402	0.057	5.066	0	1.1269	1.02	1.234	0.054	20.712	0	-0.1529
Esophagitis, GERD and related diseases	digestive	0.5287	-0.105	1.163	0.323	1.635	1.69673	0.900325	3.19952	22	6509	20	8333	0.102119	0.239142	not_significant	0.229611	0.990892	1.4317	1.233	1.63	0.101	14.132	0	-0.0499	-0.055	-0.045	0.002	-20.57	0	0.446	0.309	0.583	0.07	6.39	0	0.2912	0.179	0.404	0.057	5.085	0	1.1283	1.022	1.235	0.054	20.733	0	-0.1511
Essential hypertension	circulatory system	0.1245	-0.039	0.288	0.083	1.492	1.13258	0.961751	1.33376	282	6249	400	7953	0.135756	0.296645	not_significant	0.0540697	0.867239	1.4384	1.24	1.637	0.101	14.187	0	-0.0501	-0.055	-0.045	0.002	-20.594	0	0.4449	0.308	0.582	0.07	6.375	0	0.2925	0.18	0.405	0.057	5.105	0	1.1284	1.022	1.235	0.054	20.733	0	-0.1527
Essential tremor	neurological	0.457	-0.31	1.224	0.391	1.168	1.57933	0.733447	3.40076	14	6517	15	8338	0.242942	0.432261	not_significant	0.198473	0.614497	1.433	1.234	1.631	0.101	14.147	0	-0.0499	-0.055	-0.045	0.002	-20.567	0	0.4431	0.306	0.58	0.07	6.351	0	0.2906	0.178	0.403	0.057	5.075	0	1.1268	1.02	1.233	0.054	20.713	0	-0.1531
Eustachian tube disorders	sense organs	0.0466	-0.238	0.331	0.145	0.321	1.0477	0.788203	1.39236	86	6445	129	8224	0.748398	0.852915	not_significant	0.0202381	0.125867	1.4325	1.234	1.631	0.101	14.14	0	-0.0498	-0.055	-0.045	0.002	-20.555	0	0.4434	0.307	0.58	0.07	6.353	0	0.2904	0.178	0.403	0.057	5.07	0	1.1264	1.02	1.233	0.054	20.698	0	-0.1533
Exophthalmos	endocrine/metabolic	0.4146	-1.41	2.239	0.931	0.445	1.51377	0.244143	9.38394	10	6521	10	8343	0.656096	0.791386	not_significant	0.180058	0.183033	1.433	1.234	1.632	0.101	14.145	0	-0.0498	-0.055	-0.045	0.002	-20.553	0	0.4426	0.306	0.579	0.07	6.344	0	0.2902	0.178	0.402	0.057	5.067	0	1.1257	1.019	1.232	0.054	20.698	0	-0.1532
Extrapyramidal disease and abnormal movement disorders	neurological	0.698	-0.224	1.62	0.47	1.484	2.00973	0.799315	5.05309	11	6520	10	8343	0.137741	0.299497	not_significant	0.303138	0.860936	1.4353	1.237	1.634	0.101	14.166	0	-0.0499	-0.055	-0.045	0.002	-20.573	0	0.4401	0.303	0.577	0.07	6.306	0	0.2887	0.176	0.401	0.057	5.041	0	1.1256	1.019	1.232	0.054	20.694	0	-0.1543
Extrinsic allergic alveolitis	respiratory	2.5211	0.092	4.95	1.239	2.034	12.4423	1.09636	141.175	10	6521	10	8343	0.0419383	0.131069	not_significant	1.0949	1.37739	1.4385	1.24	1.637	0.101	14.193	0	-0.05	-0.055	-0.045	0.002	-20.607	0	0.4437	0.307	0.58	0.07	6.359	0	0.2902	0.178	0.402	0.057	5.066	0	1.1269	1.02	1.234	0.054	20.714	0	-0.1533
Eye infection, viral	sense organs	-0.1798	-0.808	0.449	0.321	-0.561	0.835437	0.445749	1.56674	17	6514	28	8325	0.575062	0.740246	not_significant	-0.0780861	0.240285	1.4336	1.235	1.632	0.101	14.151	0	-0.0498	-0.055	-0.045	0.002	-20.552	0	0.4426	0.306	0.579	0.07	6.344	0	0.2901	0.178	0.402	0.057	5.065	0	1.1255	1.019	1.232	0.054	20.693	0	-0.1535
Facial nerve disorders [CN7]	neurological	0.5704	-0.357	1.498	0.473	1.206	1.76897	0.699772	4.47273	10	6521	10	8343	0.227997	0.415169	not_significant	0.247722	0.64207	1.4334	1.235	1.632	0.101	14.152	0	-0.0499	-0.055	-0.045	0.002	-20.572	0	0.4434	0.307	0.58	0.07	6.355	0	0.29	0.178	0.402	0.057	5.064	0	1.1271	1.02	1.234	0.054	20.717	0	-0.1524
Facial weakness	symptoms	1.2813	0.118	2.445	0.594	2.159	3.60132	1.12524	11.5305	10	6521	10	8343	0.0308635	0.105703	not_significant	0.556462	1.51056	1.4351	1.237	1.634	0.101	14.161	0	-0.0499	-0.055	-0.045	0.002	-20.584	0	0.4438	0.307	0.581	0.07	6.36	0	0.2908	0.178	0.403	0.057	5.076	0	1.1272	1.021	1.234	0.054	20.716	0	-0.1524
Family history		0.0671	-0.065	0.199	0.067	0.999	1.0694	0.937067	1.22018	456	6075	624	7729	0.317755	0.523781	not_significant	0.0291412	0.497907	1.4348	1.236	1.633	0.101	14.159	0	-0.05	-0.055	-0.045	0.002	-20.572	0	0.443	0.306	0.58	0.07	6.35	0	0.2874	0.175	0.4	0.057	5.014	0	1.1251	1.018	1.232	0.054	20.682	0	-0.1562
Fasciitis	musculoskeletal	-0.0168	-0.294	0.26	0.141	-0.119	0.98334	0.745276	1.29693	87	6444	146	8207	0.905229	0.949772	not_significant	-0.00729615	0.0432415	1.4329	1.234	1.631	0.101	14.144	0	-0.0498	-0.055	-0.045	0.002	-20.534	0	0.4425	0.306	0.579	0.07	6.343	0	0.2901	0.178	0.402	0.057	5.064	0	1.1257	1.019	1.232	0.054	20.689	0	-0.1534
Fever of unknown origin	symptoms	0.3188	0.084	0.554	0.12	2.658	1.37548	1.08763	1.7402	150	6381	162	8191	0.00786816	0.0403167	mi_significant	0.138453	2.10413	1.4295	1.231	1.628	0.101	14.106	0	-0.05	-0.055	-0.045	0.002	-20.602	0	0.4496	0.313	0.586	0.07	6.44	0	0.2911	0.179	0.403	0.057	5.081	0	1.1309	1.024	1.238	0.054	20.77	0	-0.1503
First degree AV block	circulatory system	1.2538	0.173	2.334	0.551	2.275	3.50363	1.18887	10.3191	10	6521	10	8343	0.0229222	0.0865804	not_significant	0.544518	1.63974	1.4415	1.243	1.64	0.101	14.22	0	-0.0501	-0.055	-0.045	0.002	-20.637	0	0.4432	0.306	0.58	0.07	6.352	0	0.2915	0.179	0.404	0.057	5.089	0	1.128	1.021	1.235	0.054	20.731	0	-0.1524
Flat foot	musculoskeletal	0.3162	-0.141	0.773	0.233	1.357	1.3719	0.868489	2.16626	37	6494	43	8310	0.174933	0.351461	not_significant	0.137324	0.757128	1.4336	1.235	1.632	0.101	14.151	0	-0.0499	-0.055	-0.045	0.002	-20.577	0	0.4434	0.307	0.58	0.07	6.356	0	0.2914	0.179	0.404	0.057	5.088	0	1.1272	1.021	1.234	0.054	20.719	0	-0.1528
Flatulence	digestive	0.408	0.148	0.668	0.133	3.079	1.50381	1.15951	1.95033	118	6413	132	8221	0.00207651	0.015336	mi_significant	0.177192	2.68267	1.4267	1.228	1.625	0.101	14.078	0	-0.0499	-0.055	-0.045	0.002	-20.594	0	0.4499	0.313	0.587	0.07	6.445	0	0.2945	0.182	0.407	0.057	5.139	0	1.1347	1.028	1.241	0.054	20.824	0	-0.1519
Fluid overload	endocrine/metabolic	1.8659	1.067	2.665	0.408	4.579	6.46175	2.90665	14.3679	32	6499	10	8343	4.67713e-06	0.000147218	mi_significant	0.81035	5.33002	1.446	1.247	1.645	0.101	14.248	0	-0.0503	-0.055	-0.046	0.002	-20.692	0	0.4468	0.31	0.584	0.07	6.399	0	0.2877	0.175	0.4	0.057	5.018	0	1.1271	1.02	1.234	0.054	20.707	0	-0.1518
Foreign body injury		0.4531	-0.019	0.925	0.241	1.883	1.57318	0.981179	2.52187	39	6492	38	8315	0.0596993	0.164422	not_significant	0.196779	1.22403	1.4321	1.234	1.631	0.101	14.136	0	-0.0499	-0.055	-0.045	0.002	-20.572	0	0.444	0.307	0.581	0.07	6.363	0	0.2911	0.179	0.403	0.057	5.082	0	1.1272	1.021	1.234	0.054	20.72	0	-0.1532
Fracture of ankle and foot	injuries & poisonings	0.1521	-0.192	0.496	0.176	0.866	1.16428	0.825307	1.64214	62	6469	83	8270	0.386415	0.591936	not_significant	0.0660562	0.412946	1.4339	1.235	1.632	0.101	14.153	0	-0.0499	-0.055	-0.045	0.002	-20.567	0	0.4437	0.307	0.58	0.07	6.359	0	0.2896	0.177	0.402	0.057	5.057	0	1.126	1.019	1.233	0.054	20.701	0	-0.154
Fracture of clavicle or scapula	injuries & poisonings	-0.2197	-0.995	0.556	0.396	-0.555	0.80276	0.369723	1.74368	11	6520	18	8335	0.578921	0.741982	not_significant	-0.0954145	0.23738	1.4339	1.235	1.632	0.101	14.153	0	-0.0498	-0.055	-0.045	0.002	-20.557	0	0.4425	0.306	0.579	0.07	6.343	0	0.2901	0.178	0.402	0.057	5.066	0	1.1258	1.019	1.232	0.054	20.698	0	-0.1532
Fracture of foot	injuries & poisonings	0.0149	-1.497	1.527	0.771	0.019	1.01501	0.223801	4.60434	10	6521	10	8343	0.984609	0.991358	not_significant	0.00647099	0.0067364	1.433	1.234	1.632	0.101	14.144	0	-0.0498	-0.055	-0.045	0.002	-20.551	0	0.4427	0.306	0.579	0.07	6.346	0	0.2902	0.178	0.402	0.057	5.067	0	1.1258	1.019	1.232	0.054	20.698	0	-0.1534
Fracture of hand or wrist	injuries & poisonings	-0.2267	-0.586	0.132	0.183	-1.237	0.79716	0.556549	1.14111	50	6481	91	8262	0.216049	0.403901	not_significant	-0.0984546	0.665447	1.4353	1.237	1.634	0.101	14.166	0	-0.0498	-0.055	-0.045	0.002	-20.55	0	0.4404	0.304	0.577	0.07	6.311	0	0.29	0.178	0.402	0.057	5.064	0	1.1245	1.018	1.231	0.054	20.672	0	-0.1535
Fracture of humerus	injuries & poisonings	0.5856	-0.202	1.373	0.402	1.458	1.79607	0.817095	3.94717	14	6517	14	8339	0.144878	0.31171	not_significant	0.254323	0.838996	1.4336	1.235	1.632	0.101	14.152	0	-0.0499	-0.055	-0.045	0.002	-20.568	0	0.4427	0.306	0.579	0.07	6.346	0	0.29	0.178	0.402	0.057	5.065	0	1.1262	1.02	1.233	0.054	20.705	0	-0.1544
Fracture of lower limb	injuries & poisonings	-0.2771	-0.885	0.331	0.31	-0.893	0.757979	0.412714	1.39236	18	6513	31	8322	0.371935	0.578468	not_significant	-0.120343	0.429533	1.4341	1.235	1.633	0.101	14.154	0	-0.0498	-0.055	-0.045	0.002	-20.549	0	0.4415	0.305	0.578	0.07	6.328	0	0.2902	0.178	0.402	0.057	5.067	0	1.1256	1.019	1.232	0.054	20.693	0	-0.1538
Fracture of neck of femur	injuries & poisonings	0.4521	-0.978	1.883	0.73	0.619	1.57161	0.376062	6.57319	10	6521	10	8343	0.535685	0.716053	not_significant	0.196345	0.27109	1.4342	1.236	1.633	0.101	14.155	0	-0.0499	-0.055	-0.045	0.002	-20.56	0	0.4428	0.306	0.579	0.07	6.347	0	0.2899	0.178	0.402	0.057	5.061	0	1.1255	1.019	1.232	0.054	20.692	0	-0.1536
Fracture of patella	injuries & poisonings	-0.5387	-2.228	1.151	0.862	-0.625	0.583506	0.107744	3.16135	10	6521	10	8343	0.532059	0.713441	not_significant	-0.233954	0.274041	1.433	1.234	1.632	0.101	14.145	0	-0.0498	-0.055	-0.045	0.002	-20.547	0	0.4423	0.306	0.579	0.07	6.34	0	0.2903	0.178	0.403	0.057	5.07	0	1.1256	1.019	1.232	0.054	20.694	0	-0.1537
Fracture of pelvis	injuries & poisonings	0.6868	-0.975	2.349	0.848	0.81	1.98735	0.377192	10.4751	10	6521	10	8343	0.417965	0.627185	not_significant	0.298273	0.37886	1.433	1.234	1.632	0.101	14.147	0	-0.0499	-0.055	-0.045	0.002	-20.562	0	0.4432	0.306	0.58	0.07	6.353	0	0.2908	0.178	0.403	0.057	5.077	0	1.1267	1.02	1.233	0.054	20.71	0	-0.1527
Fracture of radius and ulna	injuries & poisonings	0.0547	-0.525	0.634	0.296	0.185	1.05622	0.591555	1.88514	21	6510	31	8322	0.853144	0.919948	not_significant	0.0237559	0.0689775	1.4329	1.234	1.631	0.101	14.145	0	-0.0498	-0.055	-0.045	0.002	-20.553	0	0.4429	0.306	0.58	0.07	6.348	0	0.2902	0.178	0.402	0.057	5.068	0	1.1259	1.019	1.233	0.054	20.7	0	-0.1534
Fracture of ribs	injuries & poisonings	0.2385	-0.308	0.785	0.279	0.856	1.26934	0.734915	2.19241	24	6507	34	8319	0.392205	0.60011	not_significant	0.103579	0.406487	1.434	1.235	1.633	0.101	14.155	0	-0.0499	-0.055	-0.045	0.002	-20.569	0	0.443	0.306	0.58	0.07	6.35	0	0.2908	0.179	0.403	0.057	5.077	0	1.127	1.02	1.234	0.054	20.713	0	-0.1529
Fracture of tibia and fibula	injuries & poisonings	0.0192	-0.625	0.664	0.329	0.058	1.01939	0.535261	1.94255	18	6513	23	8330	0.953358	0.981925	not_significant	0.00833845	0.0207442	1.4328	1.234	1.631	0.101	14.14	0	-0.0498	-0.055	-0.045	0.002	-20.552	0	0.4428	0.306	0.58	0.07	6.346	0	0.2903	0.178	0.403	0.057	5.068	0	1.1259	1.019	1.233	0.054	20.696	0	-0.1533
Fracture of unspecified bones	injuries & poisonings	-0.322	-1.349	0.705	0.524	-0.614	0.724698	0.2595	2.02385	10	6521	11	8342	0.538906	0.718371	not_significant	-0.139843	0.268487	1.4341	1.235	1.633	0.101	14.154	0	-0.0498	-0.055	-0.045	0.002	-20.556	0	0.4421	0.305	0.579	0.07	6.336	0	0.2901	0.178	0.402	0.057	5.065	0	1.1254	1.019	1.232	0.054	20.689	0	-0.1537
Fracture of unspecified part of femur	injuries & poisonings	0.0829	-0.984	1.15	0.545	0.152	1.08643	0.373813	3.15819	10	6521	10	8343	0.879042	0.937172	not_significant	0.036003	0.0559903	1.4331	1.235	1.632	0.101	14.146	0	-0.0498	-0.055	-0.045	0.002	-20.552	0	0.4428	0.306	0.58	0.07	6.348	0	0.2903	0.178	0.403	0.057	5.069	0	1.1259	1.019	1.233	0.054	20.7	0	-0.1533
Fracture of upper limb	injuries & poisonings	-0.3965	-1.877	1.084	0.756	-0.525	0.67267	0.153049	2.95648	10	6521	10	8343	0.599711	0.75701	not_significant	-0.172198	0.222058	1.4335	1.235	1.632	0.101	14.149	0	-0.0498	-0.055	-0.045	0.002	-20.551	0	0.4423	0.306	0.579	0.07	6.339	0	0.2899	0.178	0.402	0.057	5.062	0	1.1256	1.019	1.232	0.054	20.695	0	-0.1537
Fracture of vertebral column without mention of spinal cord injury	injuries & poisonings	0.0126	-0.593	0.619	0.309	0.041	1.01268	0.552667	1.85707	20	6511	29	8324	0.967415	0.986971	not_significant	0.00547211	0.0143872	1.433	1.234	1.632	0.101	14.146	0	-0.0498	-0.055	-0.045	0.002	-20.549	0	0.4427	0.306	0.579	0.07	6.346	0	0.2902	0.178	0.402	0.057	5.068	0	1.1258	1.019	1.232	0.054	20.699	0	-0.1534
Frequency of urination and polyuria	genitourinary	0.4248	0.188	0.661	0.121	3.519	1.52928	1.20683	1.93673	150	6381	164	8189	0.000432974	0.00473051	mi_significant	0.184488	3.36354	1.4458	1.247	1.645	0.101	14.258	0	-0.0504	-0.055	-0.046	0.002	-20.721	0	0.4463	0.309	0.583	0.07	6.394	0	0.2893	0.177	0.402	0.057	5.049	0	1.1276	1.021	1.234	0.054	20.721	0	-0.1561
Functional digestive disorders	digestive	1.1733	0.23	2.117	0.481	2.438	3.23264	1.2586	8.30618	15	6516	10	8343	0.0147618	0.0629519	not_significant	0.509558	1.83086	1.4327	1.234	1.631	0.101	14.141	0	-0.0499	-0.055	-0.045	0.002	-20.575	0	0.4447	0.308	0.581	0.07	6.374	0	0.2921	0.18	0.404	0.057	5.099	0	1.1268	1.02	1.233	0.054	20.709	0	-0.1525
Functional disorders of bladder	genitourinary	1.1747	0.548	1.801	0.32	3.676	3.23717	1.72979	6.0557	27	6504	18	8335	0.000237196	0.00300565	mi_significant	0.510166	3.62489	1.4445	1.246	1.643	0.101	14.244	0	-0.0502	-0.055	-0.045	0.002	-20.678	0	0.4433	0.306	0.58	0.07	6.35	0	0.2915	0.179	0.404	0.057	5.089	0	1.1287	1.022	1.235	0.054	20.74	0	-0.1547
Ganglion and cyst of synovium, tendon, and bursa	musculoskeletal	-0.2566	-0.675	0.162	0.214	-1.201	0.773678	0.509156	1.17586	35	6496	74	8279	0.229623	0.416981	not_significant	-0.11144	0.638984	1.4337	1.235	1.632	0.101	14.151	0	-0.0498	-0.055	-0.045	0.002	-20.528	0	0.4402	0.303	0.577	0.07	6.308	0	0.2886	0.176	0.401	0.057	5.038	0	1.1243	1.018	1.231	0.054	20.666	0	-0.1536
Gangrene	symptoms	2.2544	0.571	3.938	0.859	2.624	9.52957	1.77004	51.3159	10	6521	10	8343	0.00867795	0.0428046	mi_significant	0.979073	2.06158	1.4422	1.243	1.641	0.101	14.224	0	-0.0501	-0.055	-0.045	0.002	-20.636	0	0.4438	0.307	0.581	0.07	6.36	0	0.2896	0.177	0.402	0.057	5.056	0	1.1267	1.02	1.233	0.054	20.71	0	-0.154
Gastric ulcer	digestive	0.502	-0.199	1.203	0.358	1.403	1.65202	0.81955	3.33009	18	6513	16	8337	0.160683	0.333999	not_significant	0.218016	0.794029	1.4332	1.235	1.632	0.101	14.148	0	-0.0499	-0.055	-0.045	0.002	-20.567	0	0.4441	0.307	0.581	0.07	6.365	0	0.2896	0.177	0.402	0.057	5.056	0	1.1263	1.02	1.233	0.054	20.706	0	-0.153
Gastritis and duodenitis, NOS	digestive	0.1448	-0.28	0.569	0.217	0.669	1.15581	0.755784	1.7665	40	6491	55	8298	0.503665	0.695764	not_significant	0.0628858	0.297858	1.4331	1.235	1.632	0.101	14.146	0	-0.0499	-0.055	-0.045	0.002	-20.561	0	0.4444	0.308	0.581	0.07	6.366	0	0.2914	0.179	0.404	0.057	5.086	0	1.1272	1.02	1.234	0.054	20.709	0	-0.152
Gastroesophageal laceration-hemorrhage syndrome	digestive	-0.5914	-2.335	1.152	0.89	-0.665	0.553552	0.0968105	3.16452	10	6521	10	8343	0.506245	0.696584	not_significant	-0.256842	0.295639	1.434	1.235	1.633	0.101	14.154	0	-0.0498	-0.055	-0.045	0.002	-20.556	0	0.4421	0.305	0.579	0.07	6.337	0	0.2901	0.178	0.402	0.057	5.065	0	1.1254	1.019	1.232	0.054	20.69	0	-0.154
Gastrointestinal complications	digestive	-0.0171	-0.834	0.8	0.417	-0.041	0.983045	0.434309	2.22554	11	6520	16	8337	0.967261	0.986971	not_significant	-0.00742644	0.0144563	1.433	1.234	1.632	0.101	14.146	0	-0.0498	-0.055	-0.045	0.002	-20.552	0	0.4427	0.306	0.579	0.07	6.345	0	0.2902	0.178	0.402	0.057	5.067	0	1.1258	1.019	1.232	0.054	20.696	0	-0.1534
Gastrointestinal malfunction arising from mental factors		0.2913	-0.311	0.894	0.307	0.948	1.33817	0.732714	2.44489	23	6508	23	8330	0.343266	0.549392	not_significant	0.12651	0.464369	1.4322	1.234	1.631	0.101	14.137	0	-0.0498	-0.055	-0.045	0.002	-20.552	0	0.4423	0.306	0.579	0.07	6.339	0	0.2903	0.178	0.403	0.057	5.069	0	1.126	1.019	1.233	0.054	20.701	0	-0.1535
Gastroparesis	digestive	0.9558	-0.385	2.296	0.684	1.397	2.60075	0.680451	9.93437	10	6521	10	8343	0.16229	0.335862	not_significant	0.415099	0.789707	1.4355	1.237	1.634	0.101	14.167	0	-0.0499	-0.055	-0.045	0.002	-20.58	0	0.4431	0.306	0.58	0.07	6.352	0	0.2907	0.178	0.403	0.057	5.075	0	1.1263	1.02	1.233	0.054	20.705	0	-0.1524
Generalized anxiety disorder	mental disorders	0.1596	-0.096	0.416	0.131	1.222	1.17304	0.908464	1.51589	114	6417	145	8208	0.221811	0.409544	not_significant	0.0693134	0.654018	1.4292	1.231	1.628	0.101	14.101	0	-0.0498	-0.055	-0.045	0.002	-20.549	0	0.4433	0.307	0.58	0.07	6.354	0	0.2913	0.179	0.404	0.057	5.085	0	1.1281	1.021	1.235	0.054	20.727	0	-0.1534
Generalized convulsive epilepsy	neurological	1.015	-0.407	2.437	0.726	1.399	2.75936	0.665644	11.4387	10	6521	10	8343	0.161911	0.335862	not_significant	0.440809	0.790724	1.4329	1.234	1.631	0.101	14.144	0	-0.0498	-0.055	-0.045	0.002	-20.55	0	0.442	0.305	0.579	0.07	6.336	0	0.2898	0.178	0.402	0.057	5.06	0	1.1249	1.018	1.231	0.054	20.68	0	-0.1543
Genetic Test		0.507	-0.148	1.162	0.334	1.518	1.6603	0.862431	3.19632	23	6508	18	8335	0.129081	0.286756	not_significant	0.220187	0.889138	1.4327	1.234	1.631	0.101	14.142	0	-0.0499	-0.055	-0.045	0.002	-20.56	0	0.4435	0.307	0.58	0.07	6.357	0	0.2899	0.178	0.402	0.057	5.062	0	1.1252	1.019	1.232	0.054	20.687	0	-0.1538
Genital prolapse	genitourinary	0.9539	-0.039	1.946	0.506	1.884	2.59581	0.961751	7.00063	16	6515	10	8343	0.0595907	0.164422	not_significant	0.414274	1.22482	1.4375	1.239	1.636	0.101	14.184	0	-0.05	-0.055	-0.045	0.002	-20.592	0	0.4425	0.306	0.579	0.07	6.342	0	0.2893	0.177	0.402	0.057	5.051	0	1.1225	1.016	1.229	0.054	20.629	0	-0.1528
Genu valgum or varum (acquired)	musculoskeletal	-0.0181	-1.475	1.439	0.743	-0.024	0.982063	0.228779	4.21648	10	6521	10	8343	0.980568	0.990307	not_significant	-0.00786073	0.00852211	1.433	1.234	1.632	0.101	14.146	0	-0.0498	-0.055	-0.045	0.002	-20.55	0	0.4427	0.306	0.579	0.07	6.345	0	0.2902	0.178	0.402	0.057	5.067	0	1.1258	1.019	1.232	0.054	20.694	0	-0.1534
GERD	digestive	0.291	0.13	0.452	0.082	3.544	1.33776	1.13883	1.57145	315	6216	370	7983	0.000393968	0.00434021	mi_significant	0.12638	3.40454	1.4356	1.237	1.634	0.101	14.168	0	-0.0503	-0.055	-0.046	0.002	-20.692	0	0.4481	0.311	0.585	0.07	6.421	0	0.2916	0.179	0.404	0.057	5.09	0	1.1306	1.024	1.237	0.054	20.769	0	-0.1563
Gingival and periodontal diseases	digestive	1.5542	0.207	2.901	0.687	2.261	4.7313	1.22998	18.1923	10	6521	10	8343	0.0237394	0.0894118	not_significant	0.67498	1.62453	1.4339	1.235	1.632	0.101	14.149	0	-0.0499	-0.055	-0.045	0.002	-20.565	0	0.4427	0.306	0.579	0.07	6.346	0	0.2898	0.177	0.402	0.057	5.059	0	1.1263	1.02	1.233	0.054	20.706	0	-0.1535
Gingivitis	digestive	0.4445	-1.059	1.948	0.767	0.579	1.55971	0.346802	7.01464	10	6521	10	8343	0.562317	0.731428	not_significant	0.193044	0.250019	1.4323	1.234	1.631	0.101	14.138	0	-0.0498	-0.055	-0.045	0.002	-20.552	0	0.4434	0.307	0.58	0.07	6.355	0	0.2907	0.178	0.403	0.057	5.076	0	1.1263	1.02	1.233	0.054	20.705	0	-0.1527
Glaucoma	sense organs	0.5852	0.186	0.985	0.204	2.872	1.79535	1.20442	2.67781	53	6478	54	8299	0.00407362	0.0244788	mi_significant	0.254149	2.39002	1.4465	1.248	1.645	0.101	14.255	0	-0.0503	-0.055	-0.046	0.002	-20.683	0	0.4434	0.307	0.58	0.07	6.354	0	0.2913	0.179	0.404	0.057	5.085	0	1.1279	1.021	1.235	0.054	20.729	0	-0.1523
Glossitis	digestive	1.1479	-0.331	2.627	0.755	1.521	3.15157	0.718205	13.8322	10	6521	10	8343	0.128267	0.285469	not_significant	0.498527	0.891886	1.434	1.235	1.633	0.101	14.154	0	-0.0499	-0.055	-0.045	0.002	-20.576	0	0.443	0.306	0.58	0.07	6.35	0	0.292	0.18	0.404	0.057	5.098	0	1.1275	1.021	1.234	0.054	20.721	0	-0.1518
Glossodynia	digestive	0.4061	-1.01	1.822	0.723	0.562	1.50095	0.364219	6.18421	10	6521	10	8343	0.574124	0.739758	not_significant	0.176367	0.240994	1.4329	1.234	1.631	0.101	14.144	0	-0.0498	-0.055	-0.045	0.002	-20.552	0	0.4425	0.306	0.579	0.07	6.344	0	0.2902	0.178	0.402	0.057	5.067	0	1.1258	1.019	1.232	0.054	20.7	0	-0.1536
Glucocorticoid deficiency	endocrine/metabolic	0.4526	-0.598	1.503	0.536	0.845	1.5724	0.54991	4.49515	10	6521	10	8343	0.398366	0.606728	not_significant	0.196562	0.399718	1.433	1.234	1.632	0.101	14.144	0	-0.0498	-0.055	-0.045	0.002	-20.55	0	0.4417	0.305	0.578	0.07	6.33	0	0.2897	0.177	0.402	0.057	5.059	0	1.1254	1.019	1.232	0.054	20.69	0	-0.154
Glycosuria or Acetonuria	endocrine/metabolic	1.0743	-0.671	2.819	0.89	1.207	2.92794	0.511197	16.7601	10	6521	10	8343	0.227544	0.415169	not_significant	0.466563	0.642935	1.4321	1.234	1.631	0.101	14.136	0	-0.0498	-0.055	-0.045	0.002	-20.551	0	0.4435	0.307	0.58	0.07	6.358	0	0.2906	0.178	0.403	0.057	5.074	0	1.1264	1.02	1.233	0.054	20.708	0	-0.153
Gout	endocrine/metabolic	0.6626	0.254	1.071	0.209	3.176	1.93983	1.28917	2.9183	56	6475	45	8308	0.00149287	0.011889	mi_significant	0.287764	2.82598	1.434	1.235	1.633	0.101	14.149	0	-0.05	-0.055	-0.045	0.002	-20.605	0	0.4467	0.31	0.583	0.07	6.401	0	0.29	0.178	0.402	0.057	5.062	0	1.1283	1.022	1.235	0.054	20.734	0	-0.1532
Gouty arthropathy	endocrine/metabolic	0.7049	0.271	1.139	0.221	3.183	2.02364	1.31128	3.12364	47	6484	41	8312	0.00145791	0.0117235	mi_significant	0.306134	2.83627	1.434	1.235	1.633	0.101	14.147	0	-0.05	-0.055	-0.045	0.002	-20.61	0	0.4475	0.311	0.584	0.07	6.411	0	0.2926	0.18	0.405	0.057	5.108	0	1.1306	1.024	1.237	0.054	20.771	0	-0.1529
Gram negative septicemia	infectious diseases	1.5241	0.578	2.47	0.483	3.158	4.59101	1.78247	11.8224	15	6516	10	8343	0.00158767	0.0124195	mi_significant	0.661908	2.79924	1.4381	1.239	1.637	0.101	14.184	0	-0.0501	-0.055	-0.045	0.002	-20.629	0	0.4462	0.309	0.583	0.07	6.394	0	0.2912	0.179	0.403	0.057	5.082	0	1.1305	1.024	1.237	0.054	20.769	0	-0.1502
Gram positive septicemia	infectious diseases	0.8947	-0.35	2.14	0.635	1.409	2.4466	0.704688	8.49944	10	6521	10	8343	0.158929	0.332093	not_significant	0.388563	0.798798	1.4336	1.235	1.632	0.101	14.15	0	-0.0499	-0.055	-0.045	0.002	-20.569	0	0.4434	0.307	0.58	0.07	6.356	0	0.2902	0.178	0.402	0.057	5.067	0	1.1266	1.02	1.233	0.054	20.71	0	-0.1522
Graves' disease	endocrine/metabolic	2.2367	0.139	4.334	1.07	2.09	9.36238	1.14912	76.2487	10	6521	10	8343	0.0366302	0.119568	not_significant	0.971386	1.43616	1.4343	1.236	1.633	0.101	14.154	0	-0.0499	-0.055	-0.045	0.002	-20.567	0	0.4421	0.305	0.579	0.07	6.336	0	0.2881	0.176	0.4	0.057	5.029	0	1.1254	1.019	1.232	0.054	20.688	0	-0.1525
Gross hematuria	genitourinary	0.2952	-0.171	0.761	0.238	1.242	1.3434	0.842822	2.14042	37	6494	43	8310	0.214356	0.403099	not_significant	0.128204	0.668865	1.4346	1.236	1.633	0.101	14.159	0	-0.0499	-0.055	-0.045	0.002	-20.58	0	0.4447	0.308	0.581	0.07	6.372	0	0.291	0.179	0.403	0.057	5.081	0	1.1266	1.02	1.233	0.054	20.711	0	-0.1525
H. pylori	infectious diseases	1.2164	0.675	1.758	0.276	4.404	3.37502	1.96403	5.80082	43	6488	21	8332	1.06351e-05	0.000281192	mi_significant	0.528276	4.97326	1.4383	1.239	1.637	0.101	14.18	0	-0.0501	-0.055	-0.045	0.002	-20.624	0	0.443	0.306	0.58	0.07	6.347	0	0.2903	0.178	0.403	0.057	5.066	0	1.1275	1.021	1.234	0.054	20.717	0	-0.1556
Hallucinations	mental disorders	-0.0405	-1.261	1.18	0.623	-0.065	0.960309	0.283371	3.25437	10	6521	10	8343	0.948168	0.978515	not_significant	-0.0175889	0.0231147	1.433	1.234	1.632	0.101	14.146	0	-0.0498	-0.055	-0.045	0.002	-20.552	0	0.4427	0.306	0.579	0.07	6.345	0	0.2901	0.178	0.402	0.057	5.066	0	1.1258	1.019	1.232	0.054	20.699	0	-0.1534
Hallux rigidus	musculoskeletal	-0.4927	-1.977	0.992	0.757	-0.65	0.610975	0.138484	2.69662	10	6521	10	8343	0.515371	0.701669	not_significant	-0.213977	0.28788	1.433	1.234	1.632	0.101	14.146	0	-0.0498	-0.055	-0.045	0.002	-20.549	0	0.4425	0.306	0.579	0.07	6.343	0	0.2902	0.178	0.402	0.057	5.067	0	1.126	1.019	1.233	0.054	20.702	0	-0.1533
Hallux valgus (Bunion)	musculoskeletal	0.0952	-0.24	0.431	0.171	0.556	1.09988	0.786628	1.5388	59	6472	99	8254	0.577958	0.741806	not_significant	0.0413448	0.238104	1.4335	1.235	1.632	0.101	14.15	0	-0.0499	-0.055	-0.045	0.002	-20.559	0	0.443	0.306	0.58	0.07	6.351	0	0.2903	0.178	0.403	0.057	5.07	0	1.1262	1.02	1.233	0.054	20.704	0	-0.1547
Hammer toe (acquired)	musculoskeletal	-0.3706	-1.34	0.598	0.494	-0.75	0.69032	0.261846	1.81848	10	6521	16	8337	0.453534	0.653841	not_significant	-0.16095	0.34339	1.4319	1.233	1.63	0.101	14.134	0	-0.0498	-0.055	-0.045	0.002	-20.531	0	0.443	0.306	0.58	0.07	6.351	0	0.29	0.178	0.402	0.057	5.065	0	1.1255	1.019	1.232	0.054	20.693	0	-0.1533
Hearing loss	sense organs	0.292	0.049	0.535	0.124	2.352	1.3391	1.05022	1.70745	132	6399	164	8189	0.0186792	0.07483	not_significant	0.126814	1.72864	1.4414	1.243	1.64	0.101	14.218	0	-0.0502	-0.055	-0.045	0.002	-20.657	0	0.4472	0.31	0.584	0.07	6.407	0	0.2912	0.179	0.403	0.057	5.084	0	1.1285	1.022	1.235	0.054	20.737	0	-0.1522
Heart failure NOS	circulatory system	0.5852	-0.572	1.742	0.59	0.991	1.79535	0.564396	5.70875	10	6521	10	8343	0.321633	0.528854	not_significant	0.254149	0.49264	1.4339	1.235	1.632	0.101	14.154	0	-0.0499	-0.055	-0.045	0.002	-20.568	0	0.4436	0.307	0.58	0.07	6.359	0	0.2905	0.178	0.403	0.057	5.072	0	1.1266	1.02	1.233	0.054	20.71	0	-0.153
Heart failure with preserved EF [Diastolic heart failure]	circulatory system	1.5576	0.658	2.458	0.459	3.392	4.74741	1.93093	11.6814	13	6518	10	8343	0.000694023	0.00669707	mi_significant	0.676457	3.15863	1.4498	1.251	1.649	0.101	14.285	0	-0.0504	-0.055	-0.046	0.002	-20.716	0	0.447	0.31	0.584	0.07	6.404	0	0.2926	0.18	0.405	0.057	5.106	0	1.1297	1.023	1.236	0.054	20.759	0	-0.152
Heart failure with reduced EF [Systolic or combined heart failure]	circulatory system	1.4874	0.75	2.225	0.376	3.952	4.42557	2.117	9.25348	24	6507	12	8341	7.75494e-05	0.00129773	mi_significant	0.64597	4.11042	1.4495	1.251	1.648	0.101	14.288	0	-0.0503	-0.055	-0.046	0.002	-20.705	0	0.4429	0.306	0.58	0.07	6.346	0	0.2874	0.175	0.4	0.057	5.016	0	1.1264	1.02	1.233	0.054	20.7	0	-0.1558
Heart transplant/surgery	circulatory system	1.289	-0.205	2.783	0.762	1.691	3.62916	0.814647	16.1675	10	6521	10	8343	0.0909105	0.222975	not_significant	0.559806	1.04139	1.4333	1.235	1.632	0.101	14.151	0	-0.0499	-0.055	-0.045	0.002	-20.565	0	0.4425	0.306	0.579	0.07	6.342	0	0.2878	0.175	0.4	0.057	5.023	0	1.1262	1.02	1.233	0.054	20.703	0	-0.153
Heart valve replaced	circulatory system	1.9069	0.585	3.229	0.674	2.827	6.73219	1.79499	25.2544	10	6521	10	8343	0.00469162	0.0272786	mi_significant	0.828156	2.32868	1.4378	1.239	1.636	0.101	14.185	0	-0.05	-0.055	-0.045	0.002	-20.604	0	0.4429	0.306	0.58	0.07	6.348	0	0.2891	0.177	0.401	0.057	5.047	0	1.1272	1.021	1.234	0.054	20.719	0	-0.1538
Heartburn	digestive	0.2681	-0.246	0.783	0.263	1.021	1.30748	0.781922	2.18803	29	6502	34	8319	0.30712	0.509426	not_significant	0.116434	0.512692	1.4335	1.235	1.632	0.101	14.149	0	-0.0499	-0.055	-0.045	0.002	-20.561	0	0.4423	0.306	0.579	0.07	6.34	0	0.2893	0.177	0.402	0.057	5.052	0	1.1258	1.019	1.232	0.054	20.698	0	-0.1544
Helminthiases	infectious diseases	1.0176	-1.39	3.426	1.229	0.828	2.76655	0.249075	30.7534	10	6521	10	8343	0.407533	0.616891	not_significant	0.441938	0.389838	1.4329	1.234	1.631	0.101	14.144	0	-0.0498	-0.055	-0.045	0.002	-20.555	0	0.4431	0.306	0.58	0.07	6.352	0	0.2906	0.178	0.403	0.057	5.074	0	1.1259	1.019	1.233	0.054	20.701	0	-0.1532
Hemangioma and lymphangioma, any site	neoplasms	0.1631	-0.368	0.694	0.271	0.602	1.17715	0.692117	2.00171	27	6504	33	8320	0.54695	0.721891	not_significant	0.0708334	0.262053	1.4334	1.235	1.632	0.101	14.149	0	-0.0499	-0.055	-0.045	0.002	-20.558	0	0.4428	0.306	0.58	0.07	6.348	0	0.2897	0.177	0.402	0.057	5.058	0	1.1259	1.019	1.233	0.054	20.7	0	-0.1534
Hemangioma of skin and subcutaneous tissue	neoplasms	-0.0797	-0.295	0.136	0.11	-0.725	0.923393	0.744532	1.14568	142	6389	272	8081	0.468296	0.668561	not_significant	-0.0346133	0.32948	1.4279	1.229	1.627	0.102	14.062	0	-0.0497	-0.054	-0.045	0.002	-20.431	0	0.443	0.306	0.58	0.07	6.351	0	0.2927	0.18	0.405	0.057	5.103	0	1.1267	1.02	1.233	0.054	20.711	0	-0.1503
Hematemesis	digestive	1.0888	0.079	2.099	0.515	2.113	2.97071	1.0822	8.15801	13	6518	10	8343	0.0346373	0.115341	not_significant	0.47286	1.46046	1.429	1.23	1.628	0.101	14.105	0	-0.0498	-0.055	-0.045	0.002	-20.533	0	0.4432	0.307	0.58	0.07	6.354	0	0.2915	0.179	0.404	0.057	5.089	0	1.1272	1.021	1.234	0.054	20.719	0	-0.1531
Hematuria	genitourinary	0.2551	-0.075	0.585	0.168	1.516	1.29059	0.927743	1.79499	71	6460	88	8265	0.129602	0.28699	not_significant	0.110789	0.88739	1.4362	1.238	1.635	0.101	14.173	0	-0.05	-0.055	-0.045	0.002	-20.597	0	0.4447	0.308	0.581	0.07	6.372	0	0.2903	0.178	0.403	0.057	5.07	0	1.127	1.02	1.234	0.054	20.717	0	-0.1528
Hemiplegia	neurological	-1.0478	-3.221	1.125	1.109	-0.945	0.350708	0.0399151	3.08022	10	6521	10	8343	0.344659	0.549974	not_significant	-0.455054	0.46261	1.4339	1.235	1.632	0.101	14.153	0	-0.0498	-0.055	-0.045	0.002	-20.55	0	0.4416	0.305	0.578	0.07	6.33	0	0.2894	0.177	0.402	0.057	5.053	0	1.1247	1.018	1.231	0.054	20.676	0	-0.1542
Hemoptysis	respiratory	0.6326	0.025	1.24	0.31	2.041	1.8825	1.02532	3.45561	26	6505	21	8332	0.0412329	0.130407	not_significant	0.274735	1.38476	1.4321	1.234	1.631	0.101	14.139	0	-0.0499	-0.055	-0.045	0.002	-20.567	0	0.4447	0.308	0.581	0.07	6.374	0	0.2897	0.177	0.402	0.057	5.059	0	1.1264	1.02	1.233	0.054	20.706	0	-0.1541
Hemorrhage from gastrointestinal ulcer	digestive	1.2257	-0.789	3.24	1.028	1.192	3.40655	0.454299	25.5337	10	6521	10	8343	0.233106	0.419928	not_significant	0.532315	0.632446	1.4357	1.237	1.634	0.101	14.166	0	-0.0499	-0.055	-0.045	0.002	-20.576	0	0.4428	0.306	0.58	0.07	6.347	0	0.2912	0.179	0.403	0.057	5.083	0	1.1269	1.02	1.234	0.054	20.714	0	-0.1526
Hemorrhage NOS	circulatory system	0.7829	-0.149	1.715	0.476	1.646	2.18781	0.861569	5.55668	10	6521	10	8343	0.0997786	0.23597	not_significant	0.340009	1.00096	1.436	1.237	1.635	0.101	14.177	0	-0.05	-0.055	-0.045	0.002	-20.597	0	0.4444	0.308	0.581	0.07	6.369	0	0.2909	0.179	0.403	0.057	5.078	0	1.1269	1.02	1.234	0.054	20.715	0	-0.1529
Hemorrhage of gastrointestinal tract	digestive	0.5265	-0.201	1.254	0.371	1.418	1.693	0.817912	3.50433	18	6513	15	8338	0.156238	0.328896	not_significant	0.228656	0.806213	1.4326	1.234	1.631	0.101	14.141	0	-0.0499	-0.055	-0.045	0.002	-20.56	0	0.4437	0.307	0.58	0.07	6.36	0	0.2903	0.178	0.403	0.057	5.069	0	1.1261	1.02	1.233	0.054	20.703	0	-0.1532
Hemorrhage of rectum and anus	digestive	0.3499	0.077	0.622	0.139	2.516	1.41893	1.08004	1.86265	108	6423	120	8233	0.0118589	0.05369	not_significant	0.15196	1.92595	1.4304	1.232	1.629	0.101	14.121	0	-0.0499	-0.055	-0.045	0.002	-20.587	0	0.4439	0.307	0.581	0.07	6.362	0	0.2922	0.18	0.404	0.057	5.101	0	1.1289	1.022	1.236	0.054	20.745	0	-0.155
Hemorrhage or hematoma complicating a procedure	injuries & poisonings	0.7677	-0.426	1.962	0.609	1.26	2.1548	0.653116	7.11354	10	6521	10	8343	0.207604	0.394895	not_significant	0.333408	0.682765	1.432	1.233	1.631	0.101	14.135	0	-0.0498	-0.055	-0.045	0.002	-20.55	0	0.4425	0.306	0.579	0.07	6.342	0	0.2908	0.179	0.403	0.057	5.078	0	1.1265	1.02	1.233	0.054	20.71	0	-0.1533
Hemorrhoids	circulatory system	0.0605	-0.097	0.218	0.08	0.752	1.06237	0.907556	1.24359	289	6242	471	7882	0.451994	0.653841	not_significant	0.0262748	0.344867	1.4372	1.238	1.636	0.101	14.161	0	-0.05	-0.055	-0.045	0.002	-20.497	0	0.4447	0.308	0.582	0.07	6.37	0	0.2921	0.18	0.404	0.057	5.095	0	1.1277	1.021	1.234	0.054	20.711	0	-0.1533
Hepatitis NOS	infectious diseases	0.6144	-0.604	1.833	0.622	0.988	1.84855	0.546621	6.25262	10	6521	10	8343	0.323082	0.529919	not_significant	0.266831	0.490687	1.4332	1.235	1.632	0.101	14.145	0	-0.0498	-0.055	-0.045	0.002	-20.553	0	0.4429	0.306	0.58	0.07	6.349	0	0.2894	0.177	0.402	0.057	5.054	0	1.1254	1.019	1.232	0.054	20.69	0	-0.1535
Hepatomegaly	digestive	0.5533	0.114	0.993	0.224	2.466	1.73898	1.12075	2.69932	44	6487	42	8311	0.0136464	0.059737	not_significant	0.240295	1.86498	1.4331	1.234	1.632	0.101	14.144	0	-0.05	-0.055	-0.045	0.002	-20.591	0	0.4441	0.307	0.581	0.07	6.365	0	0.2894	0.177	0.402	0.057	5.051	0	1.1299	1.023	1.237	0.054	20.758	0	-0.1518
Hereditary and idiopathic peripheral neuropathy	neurological	1.0314	0.356	1.707	0.345	2.992	2.80499	1.42761	5.5124	23	6508	16	8337	0.002776	0.019214	mi_significant	0.447931	2.55658	1.4411	1.242	1.64	0.101	14.214	0	-0.0501	-0.055	-0.045	0.002	-20.65	0	0.447	0.31	0.584	0.07	6.405	0	0.2914	0.179	0.404	0.057	5.087	0	1.1285	1.022	1.235	0.054	20.735	0	-0.1518
Hereditary hemochromatosis	hematopoietic	0.77	-0.424	1.964	0.609	1.264	2.15977	0.654424	7.12778	10	6521	10	8343	0.206142	0.393599	not_significant	0.334407	0.685833	1.4349	1.236	1.634	0.101	14.163	0	-0.0499	-0.055	-0.045	0.002	-20.574	0	0.4425	0.306	0.579	0.07	6.342	0	0.2906	0.178	0.403	0.057	5.073	0	1.1263	1.02	1.233	0.054	20.707	0	-0.1537
Herpes simplex	infectious diseases	0.0784	-0.27	0.427	0.178	0.441	1.08156	0.763379	1.53265	57	6474	89	8264	0.659329	0.793653	not_significant	0.0340487	0.180898	1.4336	1.235	1.632	0.101	14.15	0	-0.0499	-0.055	-0.045	0.002	-20.557	0	0.4429	0.306	0.58	0.07	6.348	0	0.2898	0.178	0.402	0.057	5.06	0	1.1261	1.019	1.233	0.054	20.702	0	-0.1539
Herpes zoster	infectious diseases	0.1286	-0.256	0.514	0.196	0.655	1.13724	0.774142	1.67197	49	6482	64	8289	0.51269	0.700907	not_significant	0.0558503	0.290145	1.4322	1.234	1.631	0.101	14.137	0	-0.0498	-0.055	-0.045	0.002	-20.555	0	0.4434	0.307	0.58	0.07	6.355	0	0.2904	0.178	0.403	0.057	5.071	0	1.1262	1.02	1.233	0.054	20.705	0	-0.1537
Herpes zoster with nervous system complications	infectious diseases	0.0792	-0.909	1.067	0.504	0.157	1.08242	0.402927	2.90665	10	6521	11	8342	0.875106	0.933728	not_significant	0.0343961	0.0579395	1.433	1.234	1.631	0.101	14.145	0	-0.0498	-0.055	-0.045	0.002	-20.553	0	0.4429	0.306	0.58	0.07	6.348	0	0.2903	0.178	0.403	0.057	5.069	0	1.126	1.019	1.233	0.054	20.698	0	-0.1533
Hidradenitis	dermatologic	0.8472	-0.21	1.904	0.539	1.571	2.33311	0.810584	6.71269	10	6521	10	8343	0.116259	0.266369	not_significant	0.367934	0.934572	1.4328	1.234	1.631	0.101	14.142	0	-0.0499	-0.055	-0.045	0.002	-20.561	0	0.4434	0.307	0.58	0.07	6.355	0	0.2905	0.178	0.403	0.057	5.072	0	1.1263	1.02	1.233	0.054	20.705	0	-0.1528
HIV infection, symptomatic	infectious diseases	0.8444	-1.014	2.703	0.948	0.89	2.32658	0.362765	14.9244	10	6521	10	8343	0.373226	0.579794	not_significant	0.366718	0.428028	1.4338	1.235	1.632	0.101	14.152	0	-0.0499	-0.055	-0.045	0.002	-20.559	0	0.4427	0.306	0.579	0.07	6.347	0	0.2902	0.178	0.402	0.057	5.068	0	1.1254	1.019	1.232	0.054	20.691	0	-0.1539
Hodgkin's disease	neoplasms	-0.7692	-2.475	0.937	0.87	-0.884	0.463384	0.084163	2.55231	10	6521	10	8343	0.376789	0.582591	not_significant	-0.334059	0.423901	1.4332	1.235	1.632	0.101	14.148	0	-0.0498	-0.055	-0.045	0.002	-20.547	0	0.4421	0.305	0.579	0.07	6.338	0	0.2896	0.177	0.402	0.057	5.057	0	1.1257	1.019	1.232	0.054	20.696	0	-0.1536
Hormones and synthetic substitutes causing adverse effects in therapeutic use	injuries & poisonings	0.9588	0.206	1.712	0.384	2.495	2.60856	1.22875	5.54003	21	6510	12	8341	0.0126064	0.0564939	not_significant	0.416402	1.89941	1.4349	1.236	1.634	0.101	14.162	0	-0.0499	-0.055	-0.045	0.002	-20.582	0	0.4416	0.305	0.578	0.07	6.329	0	0.2889	0.177	0.401	0.057	5.043	0	1.1258	1.019	1.232	0.054	20.697	0	-0.154
Human immunodeficiency virus [HIV] disease	infectious diseases	1.2077	-1.313	3.729	1.286	0.939	3.34578	0.269012	41.6374	10	6521	10	8343	0.347768	0.551423	not_significant	0.524497	0.45871	1.4335	1.235	1.632	0.101	14.15	0	-0.0498	-0.055	-0.045	0.002	-20.556	0	0.4427	0.306	0.579	0.07	6.346	0	0.2902	0.178	0.402	0.057	5.068	0	1.1256	1.019	1.232	0.054	20.694	0	-0.1539
Hydrocele	genitourinary	-0.2147	-0.645	0.216	0.22	-0.977	0.806783	0.524663	1.2411	34	6497	64	8289	0.32856	0.536242	not_significant	-0.093243	0.483386	1.4344	1.236	1.633	0.101	14.156	0	-0.0498	-0.055	-0.045	0.002	-20.547	0	0.4429	0.306	0.58	0.07	6.348	0	0.2899	0.178	0.402	0.057	5.063	0	1.1247	1.018	1.231	0.054	20.673	0	-0.1535
Hydrocephalus	neurological	0.2604	-1.42	1.94	0.857	0.304	1.29745	0.241714	6.95875	10	6521	10	8343	0.761321	0.861621	not_significant	0.11309	0.118432	1.4328	1.234	1.631	0.101	14.144	0	-0.0498	-0.055	-0.045	0.002	-20.553	0	0.4425	0.306	0.579	0.07	6.344	0	0.2904	0.178	0.403	0.057	5.071	0	1.126	1.019	1.233	0.054	20.701	0	-0.1532
Hydronephrosis	genitourinary	0.5327	0.06	1.005	0.241	2.209	1.70353	1.06184	2.73191	38	6493	38	8315	0.0271612	0.0988706	not_significant	0.231349	1.56605	1.4379	1.239	1.637	0.101	14.187	0	-0.0501	-0.055	-0.045	0.002	-20.618	0	0.4425	0.306	0.579	0.07	6.342	0	0.2912	0.179	0.403	0.057	5.083	0	1.1281	1.021	1.235	0.054	20.732	0	-0.1518
Hyperaldosteronism	endocrine/metabolic	1.8284	0.102	3.555	0.881	2.075	6.22392	1.10738	34.9878	10	6521	10	8343	0.0379643	0.122412	not_significant	0.794064	1.42062	1.4365	1.238	1.635	0.101	14.177	0	-0.05	-0.055	-0.045	0.002	-20.594	0	0.4433	0.307	0.58	0.07	6.353	0	0.291	0.179	0.403	0.057	5.081	0	1.1266	1.02	1.233	0.054	20.708	0	-0.1525
Hypercalcemia	endocrine/metabolic	0.5891	-0.011	1.189	0.306	1.923	1.80237	0.98906	3.2838	25	6506	23	8330	0.0544808	0.155895	not_significant	0.255843	1.26376	1.4347	1.236	1.633	0.101	14.164	0	-0.0499	-0.055	-0.045	0.002	-20.587	0	0.4421	0.305	0.579	0.07	6.336	0	0.2904	0.178	0.403	0.057	5.07	0	1.1263	1.02	1.233	0.054	20.706	0	-0.1544
Hypercholesterolemia	endocrine/metabolic	0.2109	0.03	0.392	0.093	2.279	1.23479	1.03045	1.47994	225	6306	328	8025	0.0226603	0.0865804	not_significant	0.0915927	1.64473	1.447	1.248	1.646	0.102	14.25	0	-0.0504	-0.055	-0.046	0.002	-20.659	0	0.4455	0.309	0.582	0.07	6.385	0	0.2901	0.178	0.402	0.057	5.065	0	1.1279	1.021	1.235	0.054	20.729	0	-0.1581
Hypercoagulable state	hematopoietic	0.2606	-1.321	1.842	0.807	0.323	1.29771	0.266868	6.30914	10	6521	10	8343	0.746636	0.851642	not_significant	0.113177	0.126891	1.4338	1.235	1.632	0.101	14.15	0	-0.0499	-0.055	-0.045	0.002	-20.554	0	0.4426	0.306	0.579	0.07	6.345	0	0.2902	0.178	0.402	0.057	5.067	0	1.1258	1.019	1.232	0.054	20.699	0	-0.1533
Hyperestrogenism	endocrine/metabolic	0.9569	0.019	1.895	0.479	1.999	2.60361	1.01918	6.65255	13	6518	10	8343	0.0455544	0.138443	not_significant	0.415576	1.34147	1.4337	1.235	1.632	0.101	14.149	0	-0.0499	-0.055	-0.045	0.002	-20.56	0	0.4347	0.298	0.572	0.07	6.22	0	0.2899	0.178	0.402	0.057	5.061	0	1.1266	1.02	1.233	0.054	20.713	0	-0.1532
Hyperglyceridemia	endocrine/metabolic	0.2097	-0.117	0.537	0.167	1.257	1.23331	0.889585	1.71087	70	6461	86	8267	0.208744	0.396063	not_significant	0.0910716	0.680387	1.4288	1.23	1.627	0.101	14.097	0	-0.0498	-0.055	-0.045	0.002	-20.548	0	0.4449	0.308	0.582	0.07	6.375	0	0.2918	0.18	0.404	0.057	5.094	0	1.1289	1.022	1.236	0.054	20.732	0	-0.1522
Hyperhidrosis	dermatologic	0.4486	0.04	0.857	0.208	2.154	1.56612	1.04081	2.35608	49	6482	50	8303	0.0312601	0.106785	not_significant	0.194825	1.50501	1.4335	1.235	1.632	0.101	14.15	0	-0.0499	-0.055	-0.045	0.002	-20.589	0	0.4451	0.308	0.582	0.07	6.379	0	0.2899	0.178	0.402	0.057	5.061	0	1.1276	1.021	1.234	0.054	20.726	0	-0.1536
Hyperlipidemia	endocrine/metabolic	0.2302	0.092	0.369	0.071	3.254	1.25885	1.09636	1.44629	425	6106	541	7812	0.00113635	0.00969197	mi_significant	0.0999746	2.94449	1.4431	1.244	1.642	0.101	14.229	0	-0.0504	-0.055	-0.046	0.002	-20.719	0	0.4488	0.312	0.586	0.07	6.43	0	0.292	0.18	0.404	0.057	5.097	0	1.1272	1.021	1.234	0.054	20.715	0	-0.1613
Hypermetropia	sense organs	0.4599	-0.15	1.069	0.311	1.479	1.58392	0.860708	2.91247	22	6509	25	8328	0.139142	0.302045	not_significant	0.199732	0.856542	1.4366	1.238	1.635	0.101	14.178	0	-0.05	-0.055	-0.045	0.002	-20.599	0	0.4448	0.308	0.582	0.07	6.374	0	0.2919	0.18	0.404	0.057	5.095	0	1.1273	1.021	1.234	0.054	20.72	0	-0.1515
Hyperosmolality and/or hypernatremia	endocrine/metabolic	1.6929	0.376	3.01	0.672	2.52	5.43522	1.45645	20.2874	13	6518	10	8343	0.0117367	0.05369	not_significant	0.735217	1.93045	1.431	1.232	1.63	0.101	14.119	0	-0.0498	-0.055	-0.045	0.002	-20.527	0	0.4412	0.304	0.578	0.07	6.323	0	0.2887	0.176	0.401	0.057	5.041	0	1.1253	1.019	1.232	0.054	20.688	0	-0.1546
Hyperparathyroidism	endocrine/metabolic	1.5185	0.625	2.412	0.456	3.332	4.56537	1.86825	11.1563	15	6516	10	8343	0.000862493	0.00802969	mi_significant	0.659476	3.06424	1.4438	1.245	1.643	0.101	14.24	0	-0.0502	-0.055	-0.045	0.002	-20.666	0	0.4431	0.306	0.58	0.07	6.349	0	0.291	0.179	0.403	0.057	5.08	0	1.1278	1.021	1.234	0.054	20.73	0	-0.1544
Hyperplasia of prostate	genitourinary	0.5694	0.288	0.851	0.144	3.962	1.76721	1.33376	2.34199	100	6431	118	8235	7.44308e-05	0.00127789	mi_significant	0.247287	4.12825	1.4709	1.271	1.671	0.102	14.433	0	-0.051	-0.056	-0.046	0.002	-20.837	0	0.443	0.306	0.58	0.07	6.346	0	0.2914	0.179	0.404	0.057	5.085	0	1.1294	1.023	1.236	0.054	20.751	0	-0.154
Hyperpotassemia	endocrine/metabolic	0.7601	0.345	1.175	0.212	3.591	2.13849	1.41199	3.23814	57	6474	47	8306	0.00032934	0.00381919	mi_significant	0.330107	3.48235	1.4409	1.242	1.639	0.101	14.221	0	-0.0502	-0.055	-0.045	0.002	-20.684	0	0.4463	0.31	0.583	0.07	6.394	0	0.2918	0.18	0.404	0.057	5.094	0	1.1286	1.022	1.235	0.054	20.737	0	-0.1532
Hypersensitivity angiitis	circulatory system	0.0243	-2.939	2.988	1.512	0.016	1.0246	0.0529186	19.846	10	6521	10	8343	0.987198	0.992453	not_significant	0.0105534	0.00559567	1.433	1.234	1.632	0.101	14.146	0	-0.0498	-0.055	-0.045	0.002	-20.552	0	0.4427	0.306	0.579	0.07	6.346	0	0.2902	0.178	0.402	0.057	5.068	0	1.1258	1.019	1.232	0.054	20.699	0	-0.1534
Hypersomnia	neurological	-0.0933	-0.422	0.235	0.167	-0.557	0.91092	0.655734	1.26491	58	6473	111	8242	0.57759	0.741806	not_significant	-0.0405197	0.23838	1.4328	1.234	1.631	0.101	14.144	0	-0.0498	-0.055	-0.045	0.002	-20.534	0	0.4424	0.306	0.579	0.07	6.341	0	0.2901	0.178	0.402	0.057	5.066	0	1.125	1.018	1.232	0.054	20.676	0	-0.1529
Hypertensive chronic kidney disease	circulatory system	1.5554	0.976	2.134	0.295	5.266	4.73698	2.65382	8.44859	46	6485	19	8334	1.3944e-07	1.03139e-05	mi_significant	0.675502	6.85561	1.4662	1.267	1.665	0.102	14.43	0	-0.0508	-0.056	-0.046	0.002	-20.858	0	0.4408	0.304	0.578	0.07	6.316	0	0.2854	0.173	0.398	0.057	4.977	0	1.1247	1.018	1.231	0.054	20.656	0	-0.1538
Hypertensive heart and/or renal disease	circulatory system	2.5786	1.44	3.717	0.581	4.438	13.1787	4.2207	41.1408	17	6514	10	8343	9.08127e-06	0.000250113	mi_significant	1.11987	5.04185	1.459	1.26	1.658	0.102	14.36	0	-0.0506	-0.055	-0.046	0.002	-20.786	0	0.446	0.309	0.583	0.07	6.388	0	0.291	0.179	0.403	0.057	5.078	0	1.1294	1.023	1.236	0.054	20.746	0	-0.1531
Hypertensive heart disease	circulatory system	1.2687	0.601	1.937	0.341	3.724	3.55623	1.82394	6.93791	27	6504	16	8337	0.00019633	0.00260529	mi_significant	0.550989	3.70701	1.4535	1.255	1.652	0.102	14.317	0	-0.0504	-0.055	-0.046	0.002	-20.738	0	0.4388	0.302	0.576	0.07	6.286	0	0.2901	0.178	0.402	0.057	5.063	0	1.1264	1.02	1.233	0.054	20.699	0	-0.1527
Hypertrophy of breast (Gynecomastia)	genitourinary	1.0141	0.349	1.679	0.339	2.988	2.75688	1.41765	5.36019	27	6504	15	8338	0.00280911	0.0192417	mi_significant	0.440418	2.55143	1.4304	1.232	1.629	0.101	14.115	0	-0.0499	-0.055	-0.045	0.002	-20.567	0	0.4438	0.307	0.581	0.07	6.358	0	0.292	0.18	0.404	0.057	5.097	0	1.129	1.022	1.236	0.054	20.745	0	-0.1512
Hypertrophy of salivary gland	digestive	0.0531	-2.466	2.572	1.285	0.041	1.05454	0.0849239	13.092	10	6521	10	8343	0.967029	0.986971	not_significant	0.023061	0.0145606	1.4329	1.234	1.631	0.101	14.144	0	-0.0498	-0.055	-0.045	0.002	-20.55	0	0.4427	0.306	0.579	0.07	6.346	0	0.2902	0.178	0.402	0.057	5.067	0	1.1258	1.019	1.232	0.054	20.697	0	-0.1534
Hyperventilation	respiratory	0.7391	-1.763	3.241	1.277	0.579	2.09405	0.17153	25.5593	10	6521	10	8343	0.56268	0.731428	not_significant	0.320987	0.249739	1.4333	1.235	1.632	0.101	14.148	0	-0.0498	-0.055	-0.045	0.002	-20.555	0	0.4427	0.306	0.579	0.07	6.346	0	0.2902	0.178	0.402	0.057	5.068	0	1.1254	1.019	1.232	0.054	20.691	0	-0.1535
Hypocalcemia	endocrine/metabolic	0.8895	0.069	1.71	0.419	2.124	2.43391	1.07144	5.52896	19	6512	11	8342	0.0336452	0.112891	not_significant	0.386305	1.47308	1.4325	1.234	1.631	0.101	14.139	0	-0.0499	-0.055	-0.045	0.002	-20.566	0	0.4429	0.306	0.58	0.07	6.347	0	0.2912	0.179	0.403	0.057	5.083	0	1.1259	1.019	1.233	0.054	20.698	0	-0.153
Hypoglycemia	endocrine/metabolic	1.8046	0.866	2.744	0.479	3.767	6.07754	2.37738	15.5491	24	6507	10	8343	0.000165414	0.00229822	mi_significant	0.783728	3.78143	1.4317	1.233	1.63	0.101	14.122	0	-0.0499	-0.055	-0.045	0.002	-20.561	0	0.4421	0.305	0.579	0.07	6.334	0	0.2914	0.179	0.404	0.057	5.085	0	1.1282	1.022	1.235	0.054	20.729	0	-0.1529
Hypoparathyroidism	endocrine/metabolic	1.4022	-0.908	3.712	1.178	1.19	4.06413	0.40333	40.9356	10	6521	10	8343	0.234105	0.419928	not_significant	0.608968	0.630589	1.4328	1.234	1.631	0.101	14.143	0	-0.0498	-0.055	-0.045	0.002	-20.55	0	0.4427	0.306	0.579	0.07	6.346	0	0.2897	0.177	0.402	0.057	5.058	0	1.1255	1.019	1.232	0.054	20.693	0	-0.154
Hypopotassemia	endocrine/metabolic	0.9245	0.455	1.394	0.24	3.855	2.52061	1.57617	4.03094	52	6479	32	8321	0.000115502	0.00173803	mi_significant	0.401505	3.93741	1.4412	1.243	1.64	0.101	14.217	0	-0.0502	-0.055	-0.045	0.002	-20.68	0	0.4446	0.308	0.581	0.07	6.37	0	0.2909	0.179	0.403	0.057	5.076	0	1.1275	1.021	1.234	0.054	20.715	0	-0.1506
Hyposmolality and/or hyponatremia	endocrine/metabolic	1.1074	0.702	1.513	0.207	5.358	3.02648	2.01778	4.54033	73	6458	43	8310	8.39532e-08	6.93664e-06	mi_significant	0.480938	7.07596	1.4484	1.25	1.647	0.101	14.278	0	-0.0505	-0.055	-0.046	0.002	-20.775	0	0.4438	0.307	0.581	0.07	6.355	0	0.2904	0.178	0.403	0.057	5.065	0	1.1318	1.025	1.239	0.054	20.782	0	-0.1507
Hypotension	circulatory system	0.9944	-0.531	2.52	0.778	1.278	2.7031	0.588017	12.4286	10	6521	10	8343	0.201251	0.388968	not_significant	0.431862	0.696262	1.4338	1.235	1.632	0.101	14.153	0	-0.0499	-0.055	-0.045	0.002	-20.566	0	0.4428	0.306	0.58	0.07	6.348	0	0.2907	0.178	0.403	0.057	5.075	0	1.1263	1.02	1.233	0.054	20.704	0	-0.153
Hypotension NOS	circulatory system	1.5141	0.922	2.106	0.302	5.016	4.54533	2.51431	8.21531	42	6489	18	8335	5.28591e-07	2.68768e-05	mi_significant	0.657565	6.27688	1.451	1.252	1.65	0.102	14.295	0	-0.0505	-0.055	-0.046	0.002	-20.762	0	0.4437	0.307	0.581	0.07	6.353	0	0.2908	0.178	0.403	0.057	5.073	0	1.1305	1.024	1.237	0.054	20.76	0	-0.1504
Hypothermia/Chills	symptoms	0.2779	-0.405	0.961	0.348	0.798	1.32035	0.666977	2.61431	15	6516	21	8332	0.425059	0.631083	not_significant	0.12069	0.371551	1.4338	1.235	1.632	0.101	14.153	0	-0.0499	-0.055	-0.045	0.002	-20.564	0	0.4431	0.306	0.58	0.07	6.351	0	0.2906	0.178	0.403	0.057	5.074	0	1.1266	1.02	1.233	0.054	20.709	0	-0.1532
Hypothyroidism NOS	endocrine/metabolic	0.9584	0.596	1.32	0.185	5.19	2.60752	1.81484	3.74342	87	6444	53	8300	2.10801e-07	1.3934e-05	mi_significant	0.416228	6.67613	1.4358	1.237	1.635	0.101	14.161	0	-0.0503	-0.055	-0.046	0.002	-20.725	0	0.4512	0.314	0.588	0.07	6.458	0	0.3013	0.189	0.414	0.057	5.251	0	1.1364	1.03	1.243	0.055	20.845	0	-0.1423
Hypoventilation	respiratory	0.7806	-0.573	2.134	0.691	1.13	2.18278	0.563831	8.44859	10	6521	10	8343	0.258288	0.448695	not_significant	0.33901	0.587896	1.4344	1.236	1.633	0.101	14.157	0	-0.0499	-0.055	-0.045	0.002	-20.565	0	0.4418	0.305	0.579	0.07	6.333	0	0.2899	0.178	0.402	0.057	5.062	0	1.126	1.019	1.233	0.054	20.701	0	-0.1536
Hypovolemia	endocrine/metabolic	0.5839	0.223	0.945	0.184	3.168	1.79302	1.24982	2.57281	72	6459	60	8293	0.00153584	0.012158	mi_significant	0.253585	2.81365	1.4329	1.234	1.631	0.101	14.138	0	-0.05	-0.055	-0.045	0.002	-20.609	0	0.4439	0.307	0.581	0.07	6.361	0	0.293	0.181	0.405	0.057	5.114	0	1.1293	1.023	1.236	0.054	20.747	0	-0.1513
Iatrogenic endocrine disorders	endocrine/metabolic	0.891	-1.882	3.664	1.415	0.63	2.43757	0.152285	39.0171	10	6521	10	8343	0.528817	0.711187	not_significant	0.386956	0.276694	1.4338	1.235	1.632	0.101	14.152	0	-0.0499	-0.055	-0.045	0.002	-20.558	0	0.4427	0.306	0.579	0.07	6.347	0	0.2899	0.178	0.402	0.057	5.062	0	1.1259	1.019	1.232	0.054	20.7	0	-0.1535
Iatrogenic hypotension	circulatory system	1.3047	-0.087	2.696	0.71	1.838	3.68658	0.916677	14.8203	10	6521	10	8343	0.0661041	0.177983	not_significant	0.566624	1.17977	1.4337	1.235	1.632	0.101	14.148	0	-0.0499	-0.055	-0.045	0.002	-20.562	0	0.4429	0.306	0.58	0.07	6.347	0	0.2897	0.177	0.402	0.057	5.058	0	1.126	1.019	1.233	0.054	20.699	0	-0.1529
Ichthyosis congenita	dermatologic	0.04	-2.846	2.926	1.473	0.027	1.04081	0.0580762	18.6529	10	6521	10	8343	0.978335	0.990307	not_significant	0.0173718	0.00951221	1.4329	1.234	1.632	0.101	14.144	0	-0.0498	-0.055	-0.045	0.002	-20.552	0	0.4427	0.306	0.579	0.07	6.346	0	0.2902	0.178	0.402	0.057	5.068	0	1.1258	1.019	1.232	0.054	20.699	0	-0.1534
Idiopathic fibrosing alveolitis	respiratory	0.7193	-1.279	2.718	1.02	0.705	2.053	0.278315	15.15	10	6521	10	8343	0.480589	0.678025	not_significant	0.312388	0.318227	1.4333	1.235	1.632	0.101	14.148	0	-0.0498	-0.055	-0.045	0.002	-20.555	0	0.4427	0.306	0.579	0.07	6.346	0	0.2899	0.178	0.402	0.057	5.062	0	1.1259	1.019	1.232	0.054	20.7	0	-0.1538
Ileostomy status	digestive	0.0194	-1.435	1.474	0.742	0.026	1.01959	0.238115	4.36667	10	6521	10	8343	0.979094	0.990307	not_significant	0.00842531	0.00917562	1.433	1.234	1.632	0.101	14.146	0	-0.0498	-0.055	-0.045	0.002	-20.552	0	0.4427	0.306	0.579	0.07	6.346	0	0.2902	0.178	0.402	0.057	5.067	0	1.1258	1.019	1.232	0.054	20.698	0	-0.1534
Immunity deficiency	endocrine/metabolic	1.3055	0.765	1.846	0.276	4.737	3.68953	2.14899	6.33443	58	6473	20	8333	2.16525e-06	8.24132e-05	mi_significant	0.566971	5.66449	1.4393	1.241	1.638	0.101	14.198	0	-0.0501	-0.055	-0.045	0.002	-20.631	0	0.4404	0.304	0.577	0.07	6.308	0	0.2895	0.177	0.402	0.057	5.052	0	1.119	1.012	1.226	0.054	20.556	0	-0.1564
Impacted cerumen	sense organs	0.482	0.259	0.705	0.114	4.228	1.61931	1.29563	2.02385	161	6370	182	8171	2.35945e-05	0.000495111	mi_significant	0.20933	4.62719	1.4425	1.244	1.641	0.101	14.23	0	-0.0504	-0.055	-0.046	0.002	-20.741	0	0.4484	0.312	0.585	0.07	6.423	0	0.2924	0.18	0.405	0.057	5.102	0	1.1347	1.028	1.241	0.054	20.833	0	-0.1568
Impaction of intestine	digestive	0.2817	-0.538	1.102	0.418	0.673	1.32538	0.583915	3.01018	12	6519	13	8340	0.500812	0.694145	not_significant	0.122341	0.300326	1.4326	1.234	1.631	0.101	14.143	0	-0.0498	-0.055	-0.045	0.002	-20.553	0	0.4417	0.305	0.578	0.07	6.33	0	0.2902	0.178	0.402	0.057	5.067	0	1.1258	1.019	1.232	0.054	20.699	0	-0.1538
Impaired fasting glucose	endocrine/metabolic	0.2433	-0.053	0.54	0.151	1.608	1.27545	0.94838	1.71601	85	6446	110	8243	0.107934	0.250332	not_significant	0.105664	0.96684	1.4353	1.237	1.634	0.101	14.164	0	-0.05	-0.055	-0.045	0.002	-20.595	0	0.4452	0.308	0.582	0.07	6.38	0	0.2917	0.179	0.404	0.057	5.092	0	1.1277	1.021	1.234	0.054	20.728	0	-0.1533
Impetigo	dermatologic	0.4307	-0.237	1.099	0.341	1.264	1.53833	0.788991	3.00116	17	6514	21	8332	0.206327	0.393599	not_significant	0.187051	0.685444	1.4353	1.237	1.634	0.101	14.165	0	-0.0499	-0.055	-0.045	0.002	-20.581	0	0.4435	0.307	0.58	0.07	6.357	0	0.2914	0.179	0.404	0.057	5.088	0	1.1269	1.02	1.234	0.054	20.714	0	-0.1529
Impulse control disorder	mental disorders	-0.705	-3.123	1.713	1.234	-0.571	0.494109	0.0440249	5.54557	10	6521	10	8343	0.567678	0.733598	not_significant	-0.306178	0.245898	1.4344	1.236	1.633	0.101	14.155	0	-0.0499	-0.055	-0.045	0.002	-20.558	0	0.4422	0.305	0.579	0.07	6.339	0	0.29	0.178	0.402	0.057	5.064	0	1.1253	1.019	1.232	0.054	20.688	0	-0.1539
Incisional hernia	digestive	1.3936	0.243	2.544	0.587	2.373	4.02933	1.27507	12.7305	10	6521	10	8343	0.0176273	0.0723707	not_significant	0.605233	1.75381	1.4367	1.238	1.635	0.101	14.178	0	-0.05	-0.055	-0.045	0.002	-20.594	0	0.443	0.306	0.58	0.07	6.349	0	0.2903	0.178	0.403	0.057	5.069	0	1.1267	1.02	1.233	0.054	20.711	0	-0.1546
Infection with drug-resistant microorganisms	infectious diseases	1.1512	-0.025	2.328	0.6	1.918	3.16199	0.97531	10.2574	10	6521	10	8343	0.055126	0.156718	not_significant	0.49996	1.25864	1.4359	1.237	1.635	0.101	14.17	0	-0.0499	-0.055	-0.045	0.002	-20.583	0	0.4419	0.305	0.579	0.07	6.333	0	0.289	0.177	0.401	0.057	5.045	0	1.1265	1.02	1.233	0.054	20.709	0	-0.1532
Infection/inflammation of internal prosthetic device; implant; and graft	infectious diseases	0.7322	-0.746	2.21	0.754	0.971	2.07965	0.47426	9.11572	10	6521	10	8343	0.331638	0.539203	not_significant	0.31799	0.479336	1.4326	1.234	1.631	0.101	14.141	0	-0.0498	-0.055	-0.045	0.002	-20.55	0	0.4415	0.305	0.578	0.07	6.327	0	0.2902	0.178	0.402	0.057	5.067	0	1.1256	1.019	1.232	0.054	20.694	0	-0.1532
Infectious and parasitic complications affecting pregnancy	pregnancy complications	-0.397	-3.282	2.488	1.472	-0.27	0.672334	0.0375531	12.0372	10	6521	10	8343	0.787348	0.877634	not_significant	-0.172415	0.103833	1.4332	1.235	1.632	0.101	14.147	0	-0.0498	-0.055	-0.045	0.002	-20.554	0	0.4427	0.306	0.579	0.07	6.346	0	0.2904	0.178	0.403	0.057	5.07	0	1.126	1.019	1.233	0.054	20.701	0	-0.1534
Infective connective tissue disorders	musculoskeletal	-0.7934	-3.157	1.57	1.206	-0.658	0.452304	0.0425532	4.80665	10	6521	10	8343	0.510481	0.699332	not_significant	-0.344569	0.292021	1.4325	1.234	1.631	0.101	14.14	0	-0.0498	-0.055	-0.045	0.002	-20.546	0	0.4427	0.306	0.579	0.07	6.346	0	0.2907	0.178	0.403	0.057	5.076	0	1.1261	1.019	1.233	0.054	20.703	0	-0.1533
Infestation (lice, mites)	infectious diseases	2.3524	0.766	3.939	0.809	2.906	10.5108	2.15114	51.3672	10	6521	10	8343	0.00365928	0.0228752	mi_significant	1.02163	2.4366	1.4404	1.242	1.639	0.101	14.206	0	-0.0501	-0.055	-0.045	0.002	-20.624	0	0.4429	0.306	0.58	0.07	6.348	0	0.292	0.18	0.404	0.057	5.097	0	1.1262	1.02	1.233	0.054	20.698	0	-0.1538
Inflammation of eyelids	sense organs	0.264	-0.026	0.554	0.148	1.787	1.30213	0.974335	1.7402	88	6443	115	8238	0.0739103	0.192104	not_significant	0.114654	1.13129	1.432	1.233	1.631	0.101	14.136	0	-0.0499	-0.055	-0.045	0.002	-20.58	0	0.4441	0.307	0.581	0.07	6.366	0	0.2917	0.179	0.404	0.057	5.092	0	1.1288	1.022	1.236	0.054	20.74	0	-0.1549
Inflammation of the eye	sense organs	1.2128	-1.574	4	1.422	0.853	3.36289	0.207215	54.5982	10	6521	10	8343	0.393639	0.601607	not_significant	0.526712	0.404902	1.4342	1.236	1.633	0.101	14.155	0	-0.0499	-0.055	-0.045	0.002	-20.561	0	0.4428	0.306	0.579	0.07	6.347	0	0.2902	0.178	0.402	0.057	5.068	0	1.1259	1.019	1.232	0.054	20.7	0	-0.1538
Inflammatory and toxic neuropathy	neurological	0.987	0.582	1.392	0.207	4.778	2.68317	1.78961	4.02289	65	6466	46	8307	1.76803e-06	7.34609e-05	mi_significant	0.428649	5.75251	1.4524	1.254	1.651	0.101	14.316	0	-0.0505	-0.055	-0.046	0.002	-20.76	0	0.4453	0.308	0.582	0.07	6.379	0	0.2901	0.178	0.402	0.057	5.062	0	1.1258	1.019	1.232	0.054	20.68	0	-0.1595
Influenza	respiratory	0.0149	-0.27	0.3	0.145	0.102	1.01501	0.763379	1.34986	86	6445	126	8227	0.918657	0.960051	not_significant	0.00647099	0.0368468	1.4326	1.234	1.631	0.101	14.134	0	-0.0498	-0.055	-0.045	0.002	-20.553	0	0.443	0.306	0.58	0.07	6.346	0	0.2903	0.178	0.403	0.057	5.069	0	1.1261	1.019	1.233	0.054	20.673	0	-0.1532
Ingrowing nail	dermatologic	0.1513	-0.364	0.666	0.263	0.575	1.16335	0.694891	1.94644	27	6504	38	8315	0.564981	0.733598	not_significant	0.0657088	0.247966	1.4331	1.235	1.632	0.101	14.147	0	-0.0499	-0.055	-0.045	0.002	-20.559	0	0.4425	0.306	0.579	0.07	6.343	0	0.2906	0.178	0.403	0.057	5.075	0	1.1262	1.02	1.233	0.054	20.705	0	-0.1536
Inguinal hernia	digestive	0.0883	-0.252	0.429	0.174	0.509	1.09232	0.777245	1.53572	59	6472	95	8258	0.610993	0.764175	not_significant	0.0383482	0.213964	1.4346	1.236	1.633	0.101	14.154	0	-0.0499	-0.055	-0.045	0.002	-20.547	0	0.4432	0.306	0.58	0.07	6.353	0	0.2908	0.179	0.403	0.057	5.077	0	1.1263	1.02	1.233	0.054	20.705	0	-0.1534
Injuries to the nervous system	injuries & poisonings	0.6702	-0.163	1.504	0.425	1.576	1.95463	0.849591	4.49965	13	6518	11	8342	0.114997	0.264394	not_significant	0.291064	0.939312	1.4336	1.235	1.632	0.101	14.149	0	-0.0499	-0.055	-0.045	0.002	-20.566	0	0.443	0.306	0.58	0.07	6.35	0	0.291	0.179	0.403	0.057	5.081	0	1.1265	1.02	1.233	0.054	20.709	0	-0.1536
Injury to blood vessels		0.1232	-1.607	1.853	0.883	0.14	1.13111	0.200488	6.37893	10	6521	10	8343	0.888962	0.942428	not_significant	0.0535051	0.051117	1.4328	1.234	1.631	0.101	14.143	0	-0.0498	-0.055	-0.045	0.002	-20.551	0	0.4427	0.306	0.579	0.07	6.346	0	0.2902	0.178	0.402	0.057	5.068	0	1.1259	1.019	1.233	0.054	20.7	0	-0.1533
Injury to other and unspecified nerves		1.6659	-0.573	3.904	1.142	1.459	5.29043	0.563831	49.6005	10	6521	10	8343	0.144663	0.31171	not_significant	0.723491	0.839644	1.4298	1.231	1.628	0.101	14.111	0	-0.0498	-0.055	-0.045	0.002	-20.529	0	0.4428	0.306	0.58	0.07	6.346	0	0.2913	0.179	0.404	0.057	5.086	0	1.1269	1.02	1.233	0.054	20.715	0	-0.153
Injury, NOS		0.1252	-0.02	0.27	0.074	1.691	1.13338	0.980199	1.30996	360	6171	511	7842	0.0909038	0.222975	not_significant	0.0543737	1.04142	1.431	1.232	1.63	0.101	14.125	0	-0.05	-0.055	-0.045	0.002	-20.602	0	0.4477	0.311	0.585	0.07	6.412	0	0.2916	0.179	0.404	0.057	5.091	0	1.1303	1.024	1.237	0.054	20.753	0	-0.1551
Insect bite	injuries & poisonings	0.9463	0.22	1.673	0.371	2.554	2.57616	1.24608	5.32813	18	6513	14	8339	0.0106612	0.049979	mi_significant	0.410973	1.97219	1.4373	1.239	1.636	0.101	14.18	0	-0.05	-0.055	-0.045	0.002	-20.612	0	0.4447	0.308	0.581	0.07	6.372	0	0.2924	0.18	0.405	0.057	5.105	0	1.1284	1.022	1.235	0.054	20.739	0	-0.1527
Insomnia	neurological	0.0536	-0.148	0.255	0.103	0.523	1.05506	0.862431	1.29046	180	6351	260	8093	0.601286	0.757769	not_significant	0.0232782	0.220919	1.4334	1.235	1.632	0.101	14.149	0	-0.0499	-0.055	-0.045	0.002	-20.555	0	0.4433	0.307	0.58	0.07	6.353	0	0.2902	0.178	0.402	0.057	5.067	0	1.1263	1.02	1.233	0.054	20.705	0	-0.1536
Insulin pump user	endocrine/metabolic	0.9756	-0.255	2.206	0.628	1.554	2.65276	0.774916	9.07933	10	6521	10	8343	0.120203	0.273039	not_significant	0.423698	0.920083	1.4324	1.234	1.631	0.101	14.138	0	-0.0498	-0.055	-0.045	0.002	-20.544	0	0.4413	0.305	0.578	0.07	6.325	0	0.2902	0.178	0.402	0.057	5.067	0	1.125	1.018	1.232	0.054	20.683	0	-0.155
Internal derangement of knee	injuries & poisonings	0.216	-0.081	0.513	0.152	1.425	1.2411	0.922194	1.67029	85	6446	110	8243	0.154112	0.325977	not_significant	0.0938076	0.812165	1.4347	1.236	1.633	0.101	14.159	0	-0.05	-0.055	-0.045	0.002	-20.588	0	0.4458	0.309	0.583	0.07	6.387	0	0.2915	0.179	0.404	0.057	5.089	0	1.1275	1.021	1.234	0.054	20.724	0	-0.1527
Intervertebral disc disorder with myelopathy	musculoskeletal	-0.7475	-1.785	0.29	0.529	-1.412	0.473549	0.167797	1.33643	10	6521	16	8337	0.158023	0.331598	not_significant	-0.324635	0.801279	1.4338	1.235	1.632	0.101	14.153	0	-0.0498	-0.055	-0.045	0.002	-20.528	0	0.4407	0.304	0.578	0.07	6.316	0	0.2879	0.176	0.4	0.057	5.026	0	1.1236	1.017	1.23	0.054	20.65	0	-0.156
Intestinal disaccharidase deficiencies and disaccharide malabsorption	endocrine/metabolic	0.2932	0.119	0.467	0.089	3.304	1.34071	1.12637	1.5952	251	6280	347	8006	0.000951931	0.0084019	mi_significant	0.127335	3.02139	1.4473	1.248	1.646	0.101	14.266	0	-0.0504	-0.055	-0.046	0.002	-20.726	0	0.4462	0.309	0.583	0.07	6.393	0	0.2923	0.18	0.405	0.057	5.102	0	1.1295	1.023	1.236	0.054	20.756	0	-0.1649
Intestinal helminthiases	infectious diseases	0.3111	-1.673	2.295	1.012	0.307	1.36493	0.187683	9.92444	10	6521	10	8343	0.758591	0.860083	not_significant	0.135109	0.119992	1.4333	1.235	1.632	0.101	14.148	0	-0.0498	-0.055	-0.045	0.002	-20.554	0	0.4427	0.306	0.579	0.07	6.346	0	0.2902	0.178	0.402	0.057	5.068	0	1.1256	1.019	1.232	0.054	20.695	0	-0.1535
Intestinal infection	infectious diseases	0.197	-0.199	0.593	0.202	0.976	1.21774	0.81955	1.80941	45	6486	63	8290	0.329119	0.536492	not_significant	0.085556	0.482647	1.4322	1.234	1.631	0.101	14.137	0	-0.0499	-0.055	-0.045	0.002	-20.562	0	0.4442	0.307	0.581	0.07	6.366	0	0.2904	0.178	0.403	0.057	5.071	0	1.1273	1.021	1.234	0.054	20.717	0	-0.1536
Intestinal infection due to C. difficile	infectious diseases	1.0305	-0.156	2.217	0.605	1.702	2.80247	0.855559	9.17975	10	6521	10	8343	0.0887409	0.221768	not_significant	0.44754	1.05188	1.4345	1.236	1.633	0.101	14.159	0	-0.0499	-0.055	-0.045	0.002	-20.572	0	0.4435	0.307	0.58	0.07	6.357	0	0.2896	0.177	0.402	0.057	5.057	0	1.1257	1.019	1.232	0.054	20.696	0	-0.1535
Intestinal infection due to protozoa	infectious diseases	0.3244	-0.997	1.646	0.674	0.481	1.3832	0.368985	5.18619	10	6521	10	8343	0.630367	0.776476	not_significant	0.140885	0.200406	1.4331	1.235	1.632	0.101	14.147	0	-0.0498	-0.055	-0.045	0.002	-20.557	0	0.4431	0.306	0.58	0.07	6.351	0	0.2906	0.178	0.403	0.057	5.074	0	1.1258	1.019	1.232	0.054	20.699	0	-0.1532
Intestinal malabsorption (non-celiac)	digestive	0.7292	-0.032	1.491	0.389	1.876	2.07342	0.968507	4.44153	19	6512	12	8341	0.060596	0.166199	not_significant	0.316688	1.21756	1.4313	1.233	1.63	0.101	14.128	0	-0.0498	-0.055	-0.045	0.002	-20.543	0	0.4431	0.306	0.58	0.07	6.353	0	0.2894	0.177	0.402	0.057	5.052	0	1.1252	1.019	1.232	0.054	20.685	0	-0.1547
Intracerebral hemorrhage	circulatory system	0.199	-1.035	1.433	0.629	0.316	1.22018	0.355226	4.19125	10	6521	10	8343	0.751921	0.856192	not_significant	0.0864246	0.123828	1.4335	1.235	1.632	0.101	14.148	0	-0.0499	-0.055	-0.045	0.002	-20.553	0	0.4428	0.306	0.58	0.07	6.348	0	0.2901	0.178	0.402	0.057	5.067	0	1.126	1.019	1.233	0.054	20.701	0	-0.1532
Intracranial hemorrhage	circulatory system	0.441	-1.218	2.101	0.847	0.521	1.55426	0.295821	8.17434	10	6521	10	8343	0.602435	0.758041	not_significant	0.191524	0.22009	1.4332	1.235	1.632	0.101	14.147	0	-0.0498	-0.055	-0.045	0.002	-20.555	0	0.4426	0.306	0.579	0.07	6.344	0	0.2902	0.178	0.402	0.057	5.068	0	1.1259	1.019	1.232	0.054	20.7	0	-0.1534
Intracranial hemorrhage (injury)	injuries & poisonings	2.2584	0.023	4.494	1.141	1.98	9.56777	1.02327	89.4786	10	6521	10	8343	0.0476854	0.142625	not_significant	0.980811	1.32161	1.4355	1.237	1.634	0.101	14.165	0	-0.0499	-0.055	-0.045	0.002	-20.57	0	0.442	0.305	0.579	0.07	6.334	0	0.2888	0.177	0.401	0.057	5.042	0	1.125	1.018	1.232	0.054	20.682	0	-0.1542
Iron deficiency anemia secondary to blood loss (chronic)	hematopoietic	0.8862	0.148	1.625	0.377	2.353	2.42589	1.15951	5.07842	19	6512	13	8340	0.0186322	0.07483	not_significant	0.384872	1.72974	1.4353	1.237	1.634	0.101	14.165	0	-0.05	-0.055	-0.045	0.002	-20.592	0	0.4434	0.307	0.58	0.07	6.356	0	0.291	0.179	0.403	0.057	5.08	0	1.1271	1.02	1.234	0.054	20.716	0	-0.1528
Iron deficiency anemias, unspecified or not due to blood loss	hematopoietic	0.671	0.267	1.075	0.206	3.257	1.95619	1.30604	2.92999	60	6471	48	8305	0.00112688	0.00967361	mi_significant	0.291412	2.94812	1.4367	1.238	1.635	0.101	14.18	0	-0.0501	-0.055	-0.045	0.002	-20.645	0	0.4433	0.307	0.58	0.07	6.353	0	0.2929	0.181	0.405	0.057	5.111	0	1.1286	1.022	1.235	0.054	20.737	0	-0.151
Irritable Bowel Syndrome	digestive	0.6573	0.232	1.083	0.217	3.028	1.92958	1.26112	2.95353	53	6478	41	8312	0.00246253	0.0174089	mi_significant	0.285462	2.60862	1.4296	1.231	1.628	0.101	14.109	0	-0.0499	-0.055	-0.045	0.002	-20.563	0	0.4437	0.307	0.58	0.07	6.358	0	0.292	0.18	0.404	0.057	5.097	0	1.1278	1.021	1.234	0.054	20.729	0	-0.1542
Jaundice (not of newborn)	digestive	0.0832	-0.392	0.558	0.242	0.343	1.08676	0.675704	1.74717	34	6497	42	8311	0.731426	0.847454	not_significant	0.0361333	0.13583	1.4323	1.234	1.631	0.101	14.136	0	-0.0498	-0.055	-0.045	0.002	-20.551	0	0.4429	0.306	0.58	0.07	6.349	0	0.2903	0.178	0.403	0.057	5.07	0	1.1262	1.02	1.233	0.054	20.702	0	-0.1532
Jaw disease NOS	digestive	0.3982	-2.45	3.246	1.453	0.274	1.48914	0.0862936	25.6874	10	6521	10	8343	0.784056	0.874702	not_significant	0.172936	0.105653	1.4333	1.235	1.632	0.101	14.147	0	-0.0498	-0.055	-0.045	0.002	-20.554	0	0.4427	0.306	0.579	0.07	6.346	0	0.2902	0.178	0.402	0.057	5.068	0	1.1257	1.019	1.232	0.054	20.697	0	-0.1535
Joint effusions	musculoskeletal	0.024	-0.215	0.263	0.122	0.197	1.02429	0.806541	1.30083	118	6413	199	8154	0.843933	0.916746	not_significant	0.0104231	0.0736919	1.4329	1.234	1.631	0.101	14.144	0	-0.0498	-0.055	-0.045	0.002	-20.55	0	0.4432	0.306	0.58	0.07	6.349	0	0.2905	0.178	0.403	0.057	5.071	0	1.1263	1.02	1.233	0.054	20.685	0	-0.1534
Joint/ligament sprain	injuries & poisonings	0.0689	-0.134	0.272	0.104	0.666	1.07133	0.87459	1.31259	179	6352	251	8102	0.505299	0.696584	not_significant	0.0299229	0.296451	1.4315	1.233	1.63	0.101	14.128	0	-0.0499	-0.055	-0.045	0.002	-20.559	0	0.4439	0.307	0.581	0.07	6.361	0	0.2908	0.179	0.403	0.057	5.077	0	1.1267	1.02	1.233	0.054	20.709	0	-0.154
Juvenile osteochondrosis	musculoskeletal	-1.1378	-2.857	0.581	0.877	-1.297	0.320523	0.0574408	1.78783	10	6521	10	8343	0.194557	0.379919	not_significant	-0.49414	0.710952	1.4327	1.234	1.631	0.101	14.144	0	-0.0498	-0.055	-0.045	0.002	-20.548	0	0.4433	0.307	0.58	0.07	6.353	0	0.2906	0.178	0.403	0.057	5.073	0	1.1265	1.02	1.233	0.054	20.71	0	-0.1536
Keloid scar	dermatologic	0.301	-0.287	0.889	0.3	1.003	1.35121	0.750512	2.4327	24	6507	25	8328	0.316009	0.522205	not_significant	0.130723	0.5003	1.4319	1.233	1.63	0.101	14.135	0	-0.0498	-0.055	-0.045	0.002	-20.552	0	0.4427	0.306	0.579	0.07	6.346	0	0.2903	0.178	0.403	0.057	5.069	0	1.126	1.019	1.233	0.054	20.701	0	-0.1539
Keratitis	sense organs	0.7978	-0.136	1.732	0.477	1.674	2.22065	0.872843	5.65195	11	6520	10	8343	0.0941682	0.228423	not_significant	0.34648	1.0261	1.4354	1.237	1.634	0.101	14.167	0	-0.0499	-0.055	-0.045	0.002	-20.584	0	0.4419	0.305	0.579	0.07	6.334	0	0.2908	0.179	0.403	0.057	5.078	0	1.1265	1.02	1.233	0.054	20.71	0	-0.1533
Keratoconjunctivitis	sense organs	1.4714	-0.001	2.944	0.751	1.959	4.35533	0.999	18.9917	10	6521	10	8343	0.0501549	0.146046	not_significant	0.639021	1.29969	1.4372	1.239	1.636	0.101	14.184	0	-0.0499	-0.055	-0.045	0.002	-20.592	0	0.4412	0.304	0.578	0.07	6.323	0	0.2891	0.177	0.401	0.057	5.048	0	1.1257	1.019	1.232	0.054	20.696	0	-0.1545
Keratoconjunctivitis sicca	sense organs	0.2063	-0.94	1.352	0.585	0.353	1.22912	0.390628	3.86515	10	6521	10	8343	0.724199	0.842033	not_significant	0.089595	0.140142	1.4339	1.235	1.632	0.101	14.152	0	-0.0499	-0.055	-0.045	0.002	-20.557	0	0.4413	0.304	0.578	0.07	6.315	0	0.2902	0.178	0.402	0.057	5.068	0	1.1258	1.019	1.232	0.054	20.699	0	-0.1534
Keratoconus	sense organs	0.6838	-0.321	1.689	0.513	1.333	1.98139	0.725423	5.41406	10	6521	10	8343	0.182466	0.36165	not_significant	0.296971	0.738817	1.4348	1.236	1.633	0.101	14.165	0	-0.0499	-0.055	-0.045	0.002	-20.578	0	0.4416	0.305	0.578	0.07	6.33	0	0.2898	0.178	0.402	0.057	5.059	0	1.1261	1.02	1.233	0.054	20.703	0	-0.1535
Keratoderma, acquired	dermatologic	0.6905	0.092	1.289	0.306	2.26	1.99471	1.09636	3.62916	23	6508	25	8328	0.023835	0.0895167	not_significant	0.29988	1.62278	1.4384	1.24	1.637	0.101	14.193	0	-0.05	-0.055	-0.045	0.002	-20.61	0	0.4423	0.306	0.579	0.07	6.34	0	0.291	0.179	0.403	0.057	5.081	0	1.1269	1.02	1.233	0.054	20.714	0	-0.1565
Kidney replaced by transpant	genitourinary	2.9723	0.876	5.068	1.069	2.779	19.5368	2.40128	158.856	13	6518	10	8343	0.00544788	0.0307782	mi_significant	1.29085	2.26377	1.4388	1.24	1.637	0.101	14.193	0	-0.05	-0.055	-0.045	0.002	-20.608	0	0.4423	0.306	0.579	0.07	6.339	0	0.2894	0.177	0.402	0.057	5.053	0	1.1242	1.018	1.231	0.054	20.661	0	-0.1537
Kyphoscoliosis and scoliosis	musculoskeletal	0.3867	-0.183	0.957	0.291	1.33	1.47211	0.832768	2.60387	24	6507	29	8324	0.18358	0.36277	not_significant	0.167942	0.736174	1.4355	1.237	1.634	0.101	14.169	0	-0.0499	-0.055	-0.045	0.002	-20.586	0	0.4425	0.306	0.579	0.07	6.344	0	0.2899	0.178	0.402	0.057	5.062	0	1.1265	1.02	1.233	0.054	20.709	0	-0.1538
Kyphosis (acquired)	musculoskeletal	0.9249	-0.175	2.025	0.561	1.648	2.52162	0.839457	7.57611	10	6521	10	8343	0.0993823	0.235877	not_significant	0.401679	1.00269	1.4371	1.239	1.636	0.101	14.183	0	-0.05	-0.055	-0.045	0.002	-20.596	0	0.4428	0.306	0.58	0.07	6.348	0	0.2903	0.178	0.403	0.057	5.068	0	1.126	1.019	1.233	0.054	20.7	0	-0.1525
Labyrinthitis	sense organs	1.0161	0.104	1.928	0.466	2.183	2.7624	1.1096	6.87574	14	6517	10	8343	0.0290689	0.102205	not_significant	0.441287	1.53657	1.4401	1.241	1.639	0.101	14.206	0	-0.05	-0.055	-0.045	0.002	-20.611	0	0.4406	0.304	0.577	0.07	6.314	0	0.2858	0.173	0.398	0.057	4.986	0	1.1248	1.018	1.231	0.054	20.677	0	-0.1535
Lack of coordination	neurological	0.4615	-0.218	1.141	0.347	1.331	1.58645	0.804125	3.1299	17	6514	19	8334	0.183147	0.362456	not_significant	0.200427	0.7372	1.4344	1.236	1.633	0.101	14.158	0	-0.0499	-0.055	-0.045	0.002	-20.574	0	0.443	0.306	0.58	0.07	6.349	0	0.2899	0.178	0.402	0.057	5.062	0	1.1268	1.02	1.233	0.054	20.713	0	-0.1533
Lack of normal physiological development, unspecified	endocrine/metabolic	-0.3198	-2.027	1.388	0.871	-0.367	0.726294	0.13173	4.00683	10	6521	10	8343	0.713576	0.835107	not_significant	-0.138887	0.14656	1.4336	1.235	1.632	0.101	14.15	0	-0.0498	-0.055	-0.045	0.002	-20.556	0	0.4426	0.306	0.579	0.07	6.345	0	0.2905	0.178	0.403	0.057	5.072	0	1.1259	1.019	1.233	0.054	20.7	0	-0.1535
Late effects of cerebrovascular disease	circulatory system	1.3719	0.206	2.538	0.595	2.306	3.94283	1.22875	12.6543	10	6521	10	8343	0.0211033	0.0820547	not_significant	0.595809	1.67565	1.4388	1.24	1.637	0.101	14.196	0	-0.05	-0.055	-0.045	0.002	-20.612	0	0.4437	0.307	0.58	0.07	6.36	0	0.2897	0.177	0.402	0.057	5.059	0	1.126	1.019	1.233	0.054	20.701	0	-0.1541
Laxity of ligament or hypermobility syndrome	musculoskeletal	0.464	-0.36	1.288	0.42	1.104	1.59042	0.697676	3.62553	12	6519	12	8341	0.269774	0.464983	not_significant	0.201513	0.568999	1.4326	1.234	1.631	0.101	14.141	0	-0.0499	-0.055	-0.045	0.002	-20.563	0	0.4445	0.308	0.581	0.07	6.37	0	0.2904	0.178	0.403	0.057	5.07	0	1.1274	1.021	1.234	0.054	20.719	0	-0.1519
Learning disorder	mental disorders	-0.1687	-2.579	2.242	1.23	-0.137	0.844762	0.0758498	9.41214	10	6521	10	8343	0.890914	0.942989	not_significant	-0.0732655	0.0501645	1.433	1.234	1.632	0.101	14.146	0	-0.0498	-0.055	-0.045	0.002	-20.552	0	0.4427	0.306	0.579	0.07	6.345	0	0.2902	0.178	0.402	0.057	5.068	0	1.1258	1.019	1.232	0.054	20.698	0	-0.1534
Left bundle branch block	circulatory system	0.7009	-0.502	1.904	0.614	1.142	2.01557	0.605319	6.71269	10	6521	10	8343	0.253398	0.446061	not_significant	0.304397	0.596197	1.4327	1.234	1.631	0.101	14.144	0	-0.0499	-0.055	-0.045	0.002	-20.567	0	0.4444	0.308	0.581	0.07	6.368	0	0.2916	0.179	0.404	0.057	5.09	0	1.1273	1.021	1.234	0.054	20.718	0	-0.1522
Leukemia	neoplasms	1.3263	0.014	2.639	0.67	1.98	3.76708	1.0141	13.9992	10	6521	10	8343	0.0476794	0.142625	not_significant	0.576005	1.32167	1.4384	1.24	1.637	0.101	14.189	0	-0.05	-0.055	-0.045	0.002	-20.592	0	0.4429	0.306	0.58	0.07	6.348	0	0.2883	0.176	0.401	0.057	5.033	0	1.1256	1.019	1.232	0.054	20.693	0	-0.1545
Leukoplakia of oral mucosa	digestive	0.0339	-2.407	2.475	1.246	0.027	1.03448	0.0900851	11.8817	10	6521	10	8343	0.978304	0.990307	not_significant	0.0147226	0.00952602	1.433	1.234	1.632	0.101	14.146	0	-0.0498	-0.055	-0.045	0.002	-20.552	0	0.4427	0.306	0.579	0.07	6.346	0	0.2902	0.178	0.402	0.057	5.067	0	1.1258	1.019	1.232	0.054	20.699	0	-0.1534
Lipoma	neoplasms	0.4653	0.121	0.81	0.176	2.647	1.59249	1.12862	2.24791	70	6461	71	8282	0.00812056	0.0409748	mi_significant	0.202077	2.09041	1.4316	1.233	1.63	0.101	14.13	0	-0.0499	-0.055	-0.045	0.002	-20.574	0	0.4435	0.307	0.58	0.07	6.357	0	0.2905	0.178	0.403	0.057	5.072	0	1.1274	1.021	1.234	0.054	20.722	0	-0.157
Lipoma of skin and subcutaneous tissue	neoplasms	-0.0484	-0.414	0.317	0.186	-0.26	0.952753	0.661001	1.373	51	6480	81	8272	0.794982	0.883165	not_significant	-0.0210199	0.0996424	1.4332	1.235	1.632	0.101	14.148	0	-0.0498	-0.055	-0.045	0.002	-20.548	0	0.4424	0.306	0.579	0.07	6.34	0	0.29	0.178	0.402	0.057	5.064	0	1.1256	1.019	1.232	0.054	20.692	0	-0.1534
Lipoprotein disorders	endocrine/metabolic	0.5344	-0.022	1.091	0.284	1.882	1.70642	0.97824	2.97725	31	6500	24	8329	0.0598572	0.164514	not_significant	0.232087	1.22288	1.433	1.234	1.632	0.101	14.141	0	-0.0499	-0.055	-0.045	0.002	-20.564	0	0.4437	0.307	0.58	0.07	6.36	0	0.2898	0.178	0.402	0.057	5.061	0	1.1254	1.019	1.232	0.054	20.689	0	-0.1537
Liver abscess and sequelae of chronic liver disease	digestive	2.6812	0.555	4.807	1.085	2.471	14.6026	1.74194	122.364	10	6521	10	8343	0.0134554	0.0590965	not_significant	1.16443	1.8711	1.4348	1.236	1.634	0.101	14.156	0	-0.0499	-0.055	-0.045	0.002	-20.577	0	0.4447	0.308	0.581	0.07	6.373	0	0.2891	0.177	0.401	0.057	5.046	0	1.1276	1.021	1.234	0.054	20.724	0	-0.1525
Localized adiposity	endocrine/metabolic	1.194	-1.295	3.683	1.27	0.94	3.30026	0.273898	39.7655	10	6521	10	8343	0.347113	0.551423	not_significant	0.518548	0.459529	1.4342	1.236	1.633	0.101	14.155	0	-0.0499	-0.055	-0.045	0.002	-20.564	0	0.4423	0.306	0.579	0.07	6.34	0	0.2907	0.178	0.403	0.057	5.075	0	1.126	1.019	1.233	0.054	20.702	0	-0.1529
Localized superficial swelling, mass, or lump	dermatologic	-0.1749	-0.445	0.096	0.138	-1.267	0.839541	0.640824	1.10076	91	6440	163	8190	0.205007	0.393352	not_significant	-0.0759581	0.68823	1.4355	1.237	1.634	0.101	14.167	0	-0.0498	-0.055	-0.045	0.002	-20.528	0	0.4389	0.302	0.576	0.07	6.285	0	0.2878	0.175	0.4	0.057	5.023	0	1.1232	1.017	1.23	0.054	20.637	0	-0.1547
Loose body in joint	musculoskeletal	-0.0307	-1.099	1.037	0.545	-0.056	0.969766	0.333204	2.82074	10	6521	10	8343	0.955046	0.982454	not_significant	-0.0133328	0.0199757	1.433	1.234	1.632	0.101	14.145	0	-0.0498	-0.055	-0.045	0.002	-20.551	0	0.4427	0.306	0.579	0.07	6.346	0	0.2902	0.178	0.402	0.057	5.068	0	1.1258	1.019	1.232	0.054	20.699	0	-0.1534
Lordosis (acquired)	musculoskeletal	0.1046	-1.454	1.664	0.795	0.131	1.11027	0.233634	5.28039	10	6521	10	8343	0.895399	0.945153	not_significant	0.0454272	0.0479834	1.4332	1.235	1.632	0.101	14.146	0	-0.0498	-0.055	-0.045	0.002	-20.551	0	0.4425	0.306	0.579	0.07	6.341	0	0.2902	0.178	0.402	0.057	5.067	0	1.1258	1.019	1.232	0.054	20.698	0	-0.1534
Loss of height	symptoms	0.7224	-0.721	2.166	0.736	0.981	2.05937	0.486266	8.72332	10	6521	10	8343	0.326651	0.533786	not_significant	0.313734	0.485916	1.4325	1.234	1.631	0.101	14.141	0	-0.0499	-0.055	-0.045	0.002	-20.562	0	0.4442	0.307	0.581	0.07	6.365	0	0.2914	0.179	0.404	0.057	5.088	0	1.1273	1.021	1.234	0.054	20.716	0	-0.1522
Lump or mass in breast	genitourinary	0.7144	-0.07	1.498	0.4	1.786	2.04296	0.932394	4.47273	17	6514	12	8341	0.0741096	0.192104	not_significant	0.31026	1.13013	1.4316	1.233	1.63	0.101	14.131	0	-0.0498	-0.055	-0.045	0.002	-20.554	0	0.4426	0.306	0.579	0.07	6.344	0	0.2903	0.178	0.403	0.057	5.069	0	1.1266	1.02	1.233	0.054	20.711	0	-0.1534
Lung disease due to external agents	respiratory	1.262	0.018	2.506	0.635	1.988	3.53248	1.01816	12.2558	10	6521	10	8343	0.0468328	0.141032	not_significant	0.54808	1.32945	1.4359	1.237	1.634	0.101	14.172	0	-0.0499	-0.055	-0.045	0.002	-20.587	0	0.4438	0.307	0.581	0.07	6.361	0	0.2904	0.178	0.403	0.057	5.071	0	1.1255	1.019	1.232	0.054	20.691	0	-0.1534
Lymphadenitis	hematopoietic	0.5991	0.289	0.909	0.158	3.791	1.82048	1.33509	2.48184	99	6432	83	8270	0.000150124	0.0021687	mi_significant	0.260186	3.82355	1.4365	1.238	1.635	0.101	14.181	0	-0.0501	-0.055	-0.045	0.002	-20.662	0	0.4416	0.305	0.578	0.07	6.327	0	0.2923	0.18	0.405	0.057	5.102	0	1.1277	1.021	1.234	0.054	20.719	0	-0.1533
Lymphoid leukemia	neoplasms	2.6616	0.44	4.883	1.133	2.348	14.3192	1.55271	132.026	10	6521	10	8343	0.0188652	0.0753469	not_significant	1.15592	1.72434	1.4388	1.24	1.638	0.101	14.19	0	-0.05	-0.055	-0.045	0.002	-20.599	0	0.4437	0.307	0.58	0.07	6.36	0	0.2902	0.178	0.403	0.057	5.067	0	1.1262	1.02	1.233	0.054	20.701	0	-0.1538
Lymphoid leukemia, acute	neoplasms	1.7687	-0.532	4.07	1.174	1.507	5.86323	0.587429	58.557	10	6521	10	8343	0.131925	0.290191	not_significant	0.768137	0.879673	1.4344	1.236	1.633	0.101	14.157	0	-0.0499	-0.055	-0.045	0.002	-20.575	0	0.444	0.307	0.581	0.07	6.364	0	0.2915	0.179	0.404	0.057	5.089	0	1.1267	1.02	1.233	0.054	20.711	0	-0.1524
Lymphosarcoma	neoplasms	1.0005	-1.435	3.436	1.243	0.805	2.71964	0.238115	31.0625	10	6521	10	8343	0.420775	0.628159	not_significant	0.434512	0.37595	1.432	1.233	1.631	0.101	14.135	0	-0.0498	-0.055	-0.045	0.002	-20.546	0	0.4431	0.306	0.58	0.07	6.352	0	0.2902	0.178	0.402	0.057	5.068	0	1.1262	1.02	1.233	0.054	20.705	0	-0.1532
Macroglobulinemia	endocrine/metabolic	-0.0423	-2.821	2.736	1.418	-0.03	0.958582	0.0595464	15.4252	10	6521	10	8343	0.976186	0.990307	not_significant	-0.0183707	0.0104676	1.4329	1.234	1.632	0.101	14.143	0	-0.0498	-0.055	-0.045	0.002	-20.549	0	0.4427	0.306	0.579	0.07	6.346	0	0.2902	0.178	0.402	0.057	5.068	0	1.1259	1.019	1.232	0.054	20.697	0	-0.1534
Macular degeneration (senile) of retina NOS	sense organs	0.8223	-1.951	3.596	1.415	0.581	2.27573	0.142132	36.4521	10	6521	10	8343	0.561197	0.730938	not_significant	0.35712	0.250885	1.4343	1.236	1.633	0.101	14.155	0	-0.0499	-0.055	-0.045	0.002	-20.559	0	0.4428	0.306	0.579	0.07	6.347	0	0.2902	0.178	0.402	0.057	5.068	0	1.1256	1.019	1.232	0.054	20.695	0	-0.1535
Macular degeneration, dry	sense organs	-0.3902	-2.725	1.944	1.191	-0.328	0.676921	0.0655462	6.98664	10	6521	10	8343	0.743198	0.851352	not_significant	-0.169462	0.128895	1.4321	1.234	1.631	0.101	14.133	0	-0.0498	-0.055	-0.045	0.002	-20.536	0	0.4431	0.306	0.58	0.07	6.351	0	0.2902	0.178	0.402	0.057	5.067	0	1.1259	1.019	1.233	0.054	20.701	0	-0.1533
Macular puckering of retina	sense organs	0.169	-0.956	1.294	0.574	0.294	1.18412	0.384428	3.64735	10	6521	10	8343	0.76843	0.866778	not_significant	0.0733958	0.114396	1.4341	1.235	1.633	0.101	14.146	0	-0.0499	-0.055	-0.045	0.002	-20.546	0	0.4423	0.306	0.579	0.07	6.339	0	0.2901	0.178	0.402	0.057	5.065	0	1.1259	1.019	1.232	0.054	20.7	0	-0.1535
Major depressive disorder	mental disorders	0.1436	-0.062	0.349	0.105	1.372	1.15442	0.939883	1.41765	182	6349	239	8114	0.170155	0.345357	not_significant	0.0623647	0.769156	1.4313	1.233	1.63	0.101	14.129	0	-0.0499	-0.055	-0.045	0.002	-20.578	0	0.4454	0.309	0.582	0.07	6.382	0	0.2913	0.179	0.404	0.057	5.085	0	1.1273	1.021	1.234	0.054	20.721	0	-0.1543
Malaise and fatigue	symptoms	0.2246	0.072	0.377	0.078	2.894	1.25182	1.07466	1.4579	350	6181	427	7926	0.00380014	0.0234756	mi_significant	0.0975425	2.4202	1.4311	1.233	1.63	0.101	14.129	0	-0.0502	-0.055	-0.045	0.002	-20.661	0	0.4488	0.312	0.586	0.07	6.428	0	0.2907	0.178	0.403	0.057	5.075	0	1.1328	1.026	1.24	0.054	20.796	0	-0.1509
Malignant neoplasm of bladder	neoplasms	0.3464	-0.894	1.587	0.633	0.547	1.41397	0.409016	4.88906	10	6521	10	8343	0.584153	0.74758	not_significant	0.15044	0.233473	1.4347	1.236	1.633	0.101	14.155	0	-0.0499	-0.055	-0.045	0.002	-20.558	0	0.4428	0.306	0.58	0.07	6.347	0	0.2903	0.178	0.403	0.057	5.069	0	1.1257	1.019	1.232	0.054	20.697	0	-0.1533
Malignant neoplasm of head, face, and neck	neoplasms	0.1051	-1.513	1.723	0.825	0.127	1.11082	0.220248	5.60131	10	6521	10	8343	0.898647	0.947377	not_significant	0.0456444	0.0464109	1.4332	1.235	1.632	0.101	14.146	0	-0.0498	-0.055	-0.045	0.002	-20.552	0	0.4427	0.306	0.579	0.07	6.346	0	0.2902	0.178	0.402	0.057	5.068	0	1.1258	1.019	1.232	0.054	20.698	0	-0.1534
Malignant neoplasm of kidney, except pelvis	neoplasms	1.1145	0.027	2.202	0.555	2.008	3.04804	1.02737	9.04308	12	6519	10	8343	0.0446741	0.137028	not_significant	0.484021	1.34994	1.4358	1.237	1.634	0.101	14.171	0	-0.0499	-0.055	-0.045	0.002	-20.578	0	0.4403	0.304	0.577	0.07	6.309	0	0.2882	0.176	0.4	0.057	5.032	0	1.1242	1.018	1.231	0.054	20.667	0	-0.154
Malignant neoplasm of liver, primary	neoplasms	0.1669	-0.963	1.296	0.576	0.29	1.18164	0.381746	3.65465	10	6521	10	8343	0.77212	0.868717	not_significant	0.0724837	0.112315	1.4334	1.235	1.632	0.101	14.149	0	-0.0498	-0.055	-0.045	0.002	-20.554	0	0.4428	0.306	0.58	0.07	6.347	0	0.2901	0.178	0.402	0.057	5.065	0	1.1257	1.019	1.232	0.054	20.697	0	-0.1535
Malignant neoplasm of other and ill-defined sites within the digestive organs and peritoneum	neoplasms	2.2564	-0.066	4.579	1.185	1.904	9.54865	0.936131	97.4169	10	6521	10	8343	0.0568813	0.159884	not_significant	0.979942	1.24503	1.4385	1.24	1.637	0.101	14.192	0	-0.05	-0.055	-0.045	0.002	-20.597	0	0.4429	0.306	0.58	0.07	6.348	0	0.2887	0.176	0.401	0.057	5.039	0	1.1261	1.019	1.233	0.054	20.702	0	-0.1541
Malignant neoplasm of rectum, rectosigmoid junction, and anus	neoplasms	0.7435	-0.212	1.699	0.487	1.525	2.10328	0.808965	5.46848	11	6520	10	8343	0.127182	0.284289	not_significant	0.322898	0.895573	1.4377	1.239	1.636	0.101	14.183	0	-0.05	-0.055	-0.045	0.002	-20.589	0	0.4415	0.305	0.578	0.07	6.328	0	0.2895	0.177	0.402	0.057	5.054	0	1.1249	1.018	1.231	0.054	20.68	0	-0.1536
Malignant neoplasm of retroperitoneum and peritoneum	neoplasms	-0.0285	-2.459	2.402	1.24	-0.023	0.971902	0.0855204	11.0452	10	6521	10	8343	0.981649	0.990641	not_significant	-0.0123774	0.00804371	1.433	1.234	1.632	0.101	14.145	0	-0.0498	-0.055	-0.045	0.002	-20.551	0	0.4427	0.306	0.579	0.07	6.346	0	0.2902	0.178	0.402	0.057	5.068	0	1.1258	1.019	1.232	0.054	20.698	0	-0.1534
Malignant neoplasm of small intestine, including duodenum	neoplasms	-0.7522	-3.227	1.722	1.263	-0.596	0.471328	0.0396763	5.59571	10	6521	10	8343	0.551319	0.722589	not_significant	-0.326676	0.258597	1.4327	1.234	1.631	0.101	14.143	0	-0.0498	-0.055	-0.045	0.002	-20.549	0	0.4427	0.306	0.579	0.07	6.346	0	0.2902	0.178	0.402	0.057	5.068	0	1.1263	1.02	1.233	0.054	20.705	0	-0.1533
Malignant neoplasm of testis	neoplasms	0.5944	-0.391	1.58	0.503	1.182	1.81194	0.67638	4.85496	11	6520	10	8343	0.237041	0.422431	not_significant	0.258145	0.625176	1.4313	1.233	1.63	0.101	14.127	0	-0.0498	-0.055	-0.045	0.002	-20.541	0	0.4434	0.307	0.58	0.07	6.356	0	0.2904	0.178	0.403	0.057	5.071	0	1.1256	1.019	1.232	0.054	20.693	0	-0.1536
Malignant neoplasm, other	neoplasms	0.5232	-0.015	1.062	0.275	1.904	1.68742	0.985112	2.89215	35	6496	30	8323	0.0568451	0.159884	not_significant	0.227223	1.24531	1.4386	1.24	1.637	0.101	14.198	0	-0.05	-0.055	-0.045	0.002	-20.617	0	0.4434	0.307	0.58	0.07	6.356	0	0.2901	0.178	0.402	0.057	5.066	0	1.1242	1.018	1.231	0.054	20.663	0	-0.1531
Malunion and nonunion of fracture	musculoskeletal	-0.1853	-1.054	0.684	0.443	-0.418	0.830855	0.348541	1.98179	10	6521	15	8338	0.675954	0.801445	not_significant	-0.0804748	0.170083	1.4332	1.235	1.632	0.101	14.147	0	-0.0498	-0.055	-0.045	0.002	-20.551	0	0.4424	0.306	0.579	0.07	6.342	0	0.2903	0.178	0.403	0.057	5.069	0	1.1258	1.019	1.232	0.054	20.699	0	-0.1533
Manlignant and unknown neoplasms of brain and nervous system	neoplasms	0.4406	-0.763	1.644	0.614	0.717	1.55364	0.466266	5.17583	10	6521	10	8343	0.473152	0.671145	not_significant	0.19135	0.324999	1.4333	1.235	1.632	0.101	14.149	0	-0.0499	-0.055	-0.045	0.002	-20.56	0	0.443	0.306	0.58	0.07	6.35	0	0.2905	0.178	0.403	0.057	5.073	0	1.126	1.019	1.233	0.054	20.702	0	-0.1532
Mastodynia	genitourinary	1.2775	0.357	2.198	0.47	2.719	3.58766	1.42904	9.00698	14	6517	10	8343	0.00654255	0.0353143	mi_significant	0.554811	2.18425	1.4371	1.238	1.636	0.101	14.181	0	-0.05	-0.055	-0.045	0.002	-20.6	0	0.4435	0.307	0.58	0.07	6.355	0	0.2892	0.177	0.402	0.057	5.049	0	1.1271	1.02	1.234	0.054	20.716	0	-0.1546
Mastoiditis & related conditions	sense organs	-0.54	-1.933	0.853	0.711	-0.76	0.582748	0.144713	2.34668	10	6521	10	8343	0.447279	0.649783	not_significant	-0.234519	0.349422	1.4324	1.234	1.631	0.101	14.139	0	-0.0498	-0.055	-0.045	0.002	-20.542	0	0.4431	0.306	0.58	0.07	6.352	0	0.2902	0.178	0.402	0.057	5.067	0	1.1259	1.019	1.233	0.054	20.701	0	-0.1531
Mechanical complication of unspecified genitourinary device, implant, and graft	injuries & poisonings	1.4989	0.549	2.449	0.485	3.092	4.47676	1.73152	11.5768	15	6516	10	8343	0.00199037	0.0147824	mi_significant	0.650964	2.70107	1.4441	1.245	1.643	0.101	14.24	0	-0.0502	-0.055	-0.045	0.002	-20.663	0	0.4431	0.306	0.58	0.07	6.349	0	0.2897	0.177	0.402	0.057	5.057	0	1.1268	1.02	1.233	0.054	20.708	0	-0.1525
Melanomas of skin	neoplasms	0.5608	-0.15	1.272	0.363	1.546	1.75207	0.860708	3.56798	17	6514	17	8336	0.122054	0.275351	not_significant	0.243552	0.913447	1.4365	1.238	1.635	0.101	14.176	0	-0.05	-0.055	-0.045	0.002	-20.591	0	0.4436	0.307	0.58	0.07	6.358	0	0.2906	0.178	0.403	0.057	5.075	0	1.1263	1.02	1.233	0.054	20.706	0	-0.1531
Melanomas of skin, dx or hx	neoplasms	0.3034	-0.057	0.664	0.184	1.65	1.35446	0.944594	1.94255	59	6472	78	8275	0.0988526	0.235042	not_significant	0.131765	1.00501	1.4425	1.244	1.641	0.101	14.219	0	-0.0501	-0.055	-0.045	0.002	-20.619	0	0.4418	0.305	0.579	0.07	6.332	0	0.2888	0.177	0.401	0.057	5.042	0	1.1252	1.019	1.232	0.054	20.685	0	-0.1546
Memory loss	mental disorders	0.7325	0.283	1.182	0.229	3.193	2.08027	1.32711	3.26089	44	6487	41	8312	0.00140759	0.0115271	mi_significant	0.318121	2.85152	1.4431	1.244	1.642	0.101	14.231	0	-0.0502	-0.055	-0.045	0.002	-20.678	0	0.4458	0.309	0.583	0.07	6.388	0	0.2918	0.179	0.404	0.057	5.092	0	1.1296	1.023	1.236	0.054	20.755	0	-0.1521
Meniere's disease	sense organs	0.1122	-1.235	1.46	0.688	0.163	1.11874	0.290835	4.30596	10	6521	10	8343	0.870385	0.929979	not_significant	0.0487278	0.0602885	1.4328	1.234	1.631	0.101	14.143	0	-0.0498	-0.055	-0.045	0.002	-20.552	0	0.4428	0.306	0.58	0.07	6.348	0	0.2902	0.178	0.402	0.057	5.068	0	1.1259	1.019	1.233	0.054	20.7	0	-0.1533
Meningitis	neurological	-0.2524	-1.708	1.203	0.742	-0.34	0.776934	0.181228	3.33009	10	6521	10	8343	0.733892	0.848823	not_significant	-0.109616	0.134368	1.4329	1.234	1.631	0.101	14.144	0	-0.0498	-0.055	-0.045	0.002	-20.547	0	0.4425	0.306	0.579	0.07	6.343	0	0.2902	0.178	0.402	0.057	5.067	0	1.1258	1.019	1.232	0.054	20.698	0	-0.1535
Mental retardation	mental disorders	-0.7461	-3.783	2.291	1.55	-0.482	0.474212	0.0227543	9.88482	10	6521	10	8343	0.630139	0.776476	not_significant	-0.324027	0.200563	1.4337	1.235	1.632	0.101	14.151	0	-0.0499	-0.055	-0.045	0.002	-20.557	0	0.4427	0.306	0.579	0.07	6.347	0	0.2905	0.178	0.403	0.057	5.073	0	1.126	1.019	1.233	0.054	20.702	0	-0.1534
Methicillin resistant Staphylococcus aureus	infectious diseases	0.2585	-0.789	1.306	0.535	0.483	1.29499	0.454299	3.69138	10	6521	10	8343	0.628745	0.776476	not_significant	0.112265	0.201526	1.4325	1.234	1.631	0.101	14.141	0	-0.0498	-0.055	-0.045	0.002	-20.551	0	0.4426	0.306	0.579	0.07	6.344	0	0.2901	0.178	0.402	0.057	5.066	0	1.126	1.019	1.233	0.054	20.701	0	-0.1536
Methicillin sensitive Staphylococcus aureus	infectious diseases	0.3096	-0.817	1.436	0.575	0.539	1.36288	0.441755	4.20385	10	6521	10	8343	0.590158	0.750049	not_significant	0.134458	0.229032	1.4319	1.233	1.63	0.101	14.132	0	-0.0498	-0.055	-0.045	0.002	-20.546	0	0.4433	0.307	0.58	0.07	6.354	0	0.2903	0.178	0.403	0.057	5.069	0	1.1264	1.02	1.233	0.054	20.705	0	-0.153
Microscopic hematuria	genitourinary	0.7641	0.38	1.148	0.196	3.897	2.14706	1.46228	3.15188	62	6469	52	8301	9.74131e-05	0.00151506	mi_significant	0.331844	4.01138	1.4403	1.242	1.639	0.101	14.204	0	-0.0502	-0.055	-0.045	0.002	-20.663	0	0.448	0.311	0.585	0.07	6.418	0	0.2915	0.179	0.404	0.057	5.089	0	1.1293	1.023	1.236	0.054	20.75	0	-0.1563
Migrain with aura	neurological	0.4497	0.018	0.881	0.22	2.043	1.56784	1.01816	2.41331	47	6484	43	8310	0.0410726	0.130407	not_significant	0.195302	1.38645	1.4316	1.233	1.63	0.101	14.13	0	-0.0499	-0.055	-0.045	0.002	-20.56	0	0.4434	0.307	0.58	0.07	6.355	0	0.2896	0.177	0.402	0.057	5.056	0	1.1262	1.02	1.233	0.054	20.704	0	-0.1545
Migraine	neurological	0.3756	0.094	0.657	0.144	2.614	1.45586	1.09856	1.929	102	6429	108	8245	0.0089544	0.0438434	mi_significant	0.163121	2.04796	1.4284	1.23	1.627	0.101	14.095	0	-0.0499	-0.055	-0.045	0.002	-20.57	0	0.4451	0.308	0.582	0.07	6.378	0	0.2924	0.18	0.405	0.057	5.104	0	1.1301	1.023	1.237	0.054	20.762	0	-0.1534
Mild cognitive impairment	mental disorders	0.4435	-0.759	1.646	0.614	0.723	1.55815	0.468134	5.18619	10	6521	10	8343	0.469728	0.669882	not_significant	0.19261	0.328153	1.4347	1.236	1.633	0.101	14.161	0	-0.0499	-0.055	-0.045	0.002	-20.568	0	0.4432	0.307	0.58	0.07	6.353	0	0.29	0.178	0.402	0.057	5.064	0	1.1263	1.02	1.233	0.054	20.705	0	-0.1531
Mineral deficiency NEC	endocrine/metabolic	0.8539	0.187	1.521	0.34	2.509	2.34879	1.20563	4.5768	27	6504	15	8338	0.0121113	0.0544595	not_significant	0.370844	1.91681	1.4366	1.238	1.635	0.101	14.177	0	-0.05	-0.055	-0.045	0.002	-20.601	0	0.4381	0.301	0.575	0.07	6.276	0	0.2901	0.178	0.402	0.057	5.064	0	1.1253	1.019	1.232	0.054	20.684	0	-0.1521
Miscarriage; stillbirth	pregnancy complications	0.9995	-1.481	3.481	1.266	0.79	2.71692	0.22741	32.4922	10	6521	10	8343	0.429748	0.634423	not_significant	0.434077	0.366786	1.4328	1.234	1.631	0.101	14.144	0	-0.0498	-0.055	-0.045	0.002	-20.551	0	0.4427	0.306	0.579	0.07	6.346	0	0.2902	0.178	0.402	0.057	5.068	0	1.1256	1.019	1.232	0.054	20.694	0	-0.1538
Mitral valve disease	circulatory system	1.8909	-0.315	4.097	1.125	1.68	6.62533	0.729789	60.1595	10	6521	10	8343	0.0929232	0.22665	not_significant	0.821207	1.03188	1.4336	1.235	1.632	0.101	14.15	0	-0.0498	-0.055	-0.045	0.002	-20.556	0	0.4427	0.306	0.579	0.07	6.347	0	0.2882	0.176	0.4	0.057	5.031	0	1.1259	1.019	1.232	0.054	20.7	0	-0.1542
Mixed hyperlipidemia	endocrine/metabolic	0.0491	-0.137	0.236	0.095	0.516	1.05033	0.87197	1.26617	199	6332	323	8030	0.605827	0.761315	not_significant	0.0213239	0.217651	1.4331	1.235	1.632	0.101	14.146	0	-0.0499	-0.055	-0.045	0.002	-20.55	0	0.4439	0.307	0.581	0.07	6.36	0	0.2917	0.179	0.404	0.057	5.087	0	1.1275	1.021	1.234	0.054	20.692	0	-0.1533
Mobitz II AV block		0.9408	-1.928	3.81	1.464	0.643	2.56203	0.145439	45.1504	10	6521	10	8343	0.520399	0.704163	not_significant	0.408584	0.283663	1.4337	1.235	1.632	0.101	14.152	0	-0.0499	-0.055	-0.045	0.002	-20.559	0	0.4427	0.306	0.579	0.07	6.347	0	0.2899	0.178	0.402	0.057	5.062	0	1.1259	1.019	1.232	0.054	20.7	0	-0.1536
Mood disorders	mental disorders	0.5147	0.049	0.98	0.237	2.168	1.67314	1.05022	2.66446	41	6490	37	8316	0.0301953	0.10381	not_significant	0.223531	1.52006	1.4337	1.235	1.632	0.101	14.151	0	-0.0499	-0.055	-0.045	0.002	-20.582	0	0.4445	0.308	0.581	0.07	6.37	0	0.2865	0.174	0.399	0.057	4.999	0	1.1276	1.021	1.234	0.054	20.725	0	-0.1526
Morbid obesity	endocrine/metabolic	0.4096	0.11	0.709	0.153	2.683	1.50622	1.11628	2.03196	93	6438	96	8257	0.0072929	0.0378087	mi_significant	0.177887	2.1371	1.4316	1.233	1.63	0.101	14.128	0	-0.05	-0.055	-0.045	0.002	-20.598	0	0.4437	0.307	0.58	0.07	6.357	0	0.2924	0.18	0.405	0.057	5.104	0	1.13	1.023	1.237	0.054	20.761	0	-0.1523
MRSA pneumonia	respiratory	-1.3143	-4.235	1.606	1.49	-0.882	0.268662	0.0144798	4.98284	10	6521	10	8343	0.377746	0.583326	not_significant	-0.570793	0.4228	1.4345	1.236	1.633	0.101	14.159	0	-0.0499	-0.055	-0.045	0.002	-20.566	0	0.4428	0.306	0.579	0.07	6.347	0	0.2902	0.178	0.402	0.057	5.068	0	1.1266	1.02	1.233	0.054	20.71	0	-0.1533
Multiple myeloma	neoplasms	-0.6606	-2.264	0.943	0.818	-0.807	0.516541	0.103934	2.56767	10	6521	10	8343	0.419481	0.627323	not_significant	-0.286895	0.377288	1.4304	1.232	1.629	0.101	14.115	0	-0.0498	-0.055	-0.045	0.002	-20.512	0	0.4427	0.306	0.579	0.07	6.346	0	0.291	0.179	0.403	0.057	5.081	0	1.1259	1.019	1.233	0.054	20.701	0	-0.1537
Multiple sclerosis	neurological	1.04	-0.448	2.527	0.759	1.37	2.82922	0.638905	12.5159	10	6521	10	8343	0.170589	0.345357	not_significant	0.451666	0.76805	1.432	1.233	1.631	0.101	14.135	0	-0.0498	-0.055	-0.045	0.002	-20.549	0	0.4435	0.307	0.58	0.07	6.357	0	0.291	0.179	0.403	0.057	5.081	0	1.1264	1.02	1.233	0.054	20.707	0	-0.1537
Muscle weakness	symptoms	-0.1655	-0.709	0.378	0.277	-0.596	0.84747	0.492136	1.45936	21	6510	45	8308	0.550891	0.722589	not_significant	-0.0718757	0.258934	1.4317	1.233	1.63	0.101	14.129	0	-0.0498	-0.055	-0.045	0.002	-20.515	0	0.4423	0.306	0.579	0.07	6.34	0	0.2899	0.178	0.402	0.057	5.062	0	1.1253	1.019	1.232	0.054	20.688	0	-0.1535
Muscle/tendon sprain		1.4462	-0.164	3.056	0.822	1.76	4.24695	0.848742	21.2424	10	6521	10	8343	0.0783589	0.201146	not_significant	0.628077	1.10591	1.4317	1.233	1.63	0.101	14.132	0	-0.0498	-0.055	-0.045	0.002	-20.543	0	0.4421	0.305	0.579	0.07	6.337	0	0.2902	0.178	0.402	0.057	5.067	0	1.1259	1.019	1.233	0.054	20.7	0	-0.1542
Muscular calcification and ossification	musculoskeletal	0.7198	-1.745	3.184	1.257	0.572	2.05402	0.174645	24.1431	10	6521	10	8343	0.567031	0.733598	not_significant	0.312605	0.246393	1.433	1.234	1.632	0.101	14.146	0	-0.0498	-0.055	-0.045	0.002	-20.553	0	0.4427	0.306	0.579	0.07	6.346	0	0.2896	0.177	0.402	0.057	5.057	0	1.1257	1.019	1.232	0.054	20.696	0	-0.1534
Muscular wasting and disuse atrophy	symptoms	0.4091	-0.297	1.115	0.36	1.136	1.50546	0.743044	3.04957	15	6516	19	8334	0.256103	0.447842	not_significant	0.17767	0.591585	1.4349	1.236	1.633	0.101	14.162	0	-0.0499	-0.055	-0.045	0.002	-20.575	0	0.4431	0.306	0.58	0.07	6.351	0	0.2895	0.177	0.402	0.057	5.054	0	1.1266	1.02	1.233	0.054	20.711	0	-0.1535
Musculoskeletal symptoms referable to limbs	symptoms	0.3069	-0.008	0.622	0.161	1.909	1.35921	0.992032	1.86265	82	6449	93	8260	0.0562809	0.159322	not_significant	0.133285	1.24964	1.4366	1.238	1.635	0.101	14.176	0	-0.05	-0.055	-0.045	0.002	-20.61	0	0.4446	0.308	0.581	0.07	6.372	0	0.2905	0.178	0.403	0.057	5.073	0	1.1266	1.02	1.233	0.054	20.709	0	-0.1531
Myalgia and myositis unspecified	symptoms	0.138	-0.12	0.396	0.132	1.049	1.14798	0.88692	1.48587	106	6425	153	8200	0.29409	0.49717	not_significant	0.0599326	0.53152	1.4329	1.234	1.631	0.101	14.143	0	-0.0499	-0.055	-0.045	0.002	-20.571	0	0.4435	0.307	0.58	0.07	6.357	0	0.291	0.179	0.403	0.057	5.081	0	1.1277	1.021	1.234	0.054	20.722	0	-0.1539
Mycoses	infectious diseases	1.0517	0.006	2.097	0.533	1.972	2.86251	1.00602	8.14171	14	6517	10	8343	0.0485973	0.144294	not_significant	0.456748	1.31339	1.43	1.231	1.629	0.101	14.115	0	-0.0498	-0.055	-0.045	0.002	-20.546	0	0.4451	0.308	0.582	0.07	6.379	0	0.2902	0.178	0.403	0.057	5.067	0	1.127	1.02	1.234	0.054	20.714	0	-0.1513
Myeloid leukemia, acute	neoplasms	0.9742	-1.386	3.334	1.204	0.809	2.64905	0.250074	28.0503	10	6521	10	8343	0.418469	0.627196	not_significant	0.42309	0.378337	1.4323	1.234	1.631	0.101	14.138	0	-0.0498	-0.055	-0.045	0.002	-20.549	0	0.4431	0.306	0.58	0.07	6.352	0	0.2902	0.178	0.402	0.057	5.067	0	1.1258	1.019	1.232	0.054	20.698	0	-0.153
Myeloid leukemia, chronic	neoplasms	0.2654	-2.511	3.042	1.416	0.187	1.30395	0.081187	20.9471	10	6521	10	8343	0.851378	0.919948	not_significant	0.115262	0.0698776	1.4327	1.234	1.631	0.101	14.142	0	-0.0498	-0.055	-0.045	0.002	-20.548	0	0.4427	0.306	0.579	0.07	6.346	0	0.2902	0.178	0.402	0.057	5.068	0	1.1258	1.019	1.232	0.054	20.699	0	-0.1535
Myeloproliferative disease	neoplasms	0.3715	-0.45	1.193	0.419	0.886	1.44991	0.637628	3.29696	11	6520	14	8339	0.375458	0.581894	not_significant	0.16134	0.425438	1.4337	1.235	1.632	0.101	14.152	0	-0.0499	-0.055	-0.045	0.002	-20.566	0	0.4427	0.306	0.579	0.07	6.346	0	0.29	0.178	0.402	0.057	5.065	0	1.1265	1.02	1.233	0.054	20.71	0	-0.1533
Myocardial infarction	circulatory system	1.2498	0.596	1.904	0.334	3.746	3.48964	1.81484	6.71269	26	6505	17	8336	0.000179403	0.00242011	mi_significant	0.542781	3.74617	1.4494	1.25	1.648	0.101	14.284	0	-0.0504	-0.055	-0.046	0.002	-20.728	0	0.4428	0.306	0.58	0.07	6.34	0	0.2923	0.18	0.405	0.057	5.102	0	1.1308	1.024	1.237	0.054	20.771	0	-0.1496
Myoneural disorders	neurological	-0.137	-1.967	1.693	0.934	-0.147	0.87197	0.139876	5.43576	10	6521	10	8343	0.883393	0.940439	not_significant	-0.0594983	0.0538459	1.4329	1.234	1.631	0.101	14.144	0	-0.0498	-0.055	-0.045	0.002	-20.55	0	0.4427	0.306	0.579	0.07	6.346	0	0.2903	0.178	0.402	0.057	5.068	0	1.1259	1.019	1.233	0.054	20.7	0	-0.1533
Myopathy	neurological	-0.2163	-1.5	1.067	0.655	-0.33	0.805494	0.22313	2.90665	10	6521	10	8343	0.741177	0.851352	not_significant	-0.0939379	0.130078	1.4332	1.235	1.632	0.101	14.148	0	-0.0498	-0.055	-0.045	0.002	-20.551	0	0.4423	0.306	0.579	0.07	6.34	0	0.29	0.178	0.402	0.057	5.063	0	1.1256	1.019	1.232	0.054	20.694	0	-0.1538
Myopia	sense organs	0.153	-0.193	0.499	0.176	0.867	1.16532	0.824482	1.64707	63	6468	80	8273	0.385726	0.591936	not_significant	0.0664471	0.413721	1.435	1.236	1.634	0.101	14.161	0	-0.0499	-0.055	-0.045	0.002	-20.568	0	0.4423	0.306	0.579	0.07	6.34	0	0.2902	0.178	0.402	0.057	5.068	0	1.1263	1.02	1.233	0.054	20.707	0	-0.1526
Myringitis	sense organs	0.9954	-0.54	2.531	0.783	1.271	2.70581	0.582748	12.5661	10	6521	10	8343	0.203841	0.392426	not_significant	0.432297	0.690709	1.4339	1.235	1.632	0.101	14.153	0	-0.0499	-0.055	-0.045	0.002	-20.562	0	0.4431	0.306	0.58	0.07	6.352	0	0.2906	0.178	0.403	0.057	5.075	0	1.126	1.019	1.233	0.054	20.702	0	-0.154
Nasal polyps	respiratory	0.9443	0.337	1.551	0.31	3.05	2.57101	1.40074	4.71618	30	6501	18	8335	0.00229015	0.0164542	mi_significant	0.410104	2.64014	1.4373	1.239	1.636	0.101	14.177	0	-0.05	-0.055	-0.045	0.002	-20.606	0	0.4416	0.305	0.578	0.07	6.327	0	0.2906	0.178	0.403	0.057	5.073	0	1.1263	1.02	1.233	0.054	20.703	0	-0.1535
Nausea and vomiting	symptoms	0.4731	0.243	0.703	0.117	4.037	1.60496	1.27507	2.0198	168	6363	159	8194	5.40266e-05	0.000978399	mi_significant	0.205465	4.26739	1.4267	1.228	1.625	0.101	14.08	0	-0.05	-0.055	-0.045	0.002	-20.614	0	0.4509	0.314	0.588	0.07	6.457	0	0.2891	0.177	0.401	0.057	5.044	0	1.1324	1.026	1.239	0.054	20.793	0	-0.1525
Neoplasm of uncertain behavior	neoplasms	0.1607	-0.071	0.392	0.118	1.361	1.17433	0.931462	1.47994	129	6402	217	8136	0.173648	0.349765	not_significant	0.0697911	0.76033	1.4381	1.239	1.637	0.101	14.188	0	-0.05	-0.055	-0.045	0.002	-20.598	0	0.4434	0.307	0.58	0.07	6.356	0	0.2901	0.178	0.402	0.057	5.066	0	1.127	1.02	1.234	0.054	20.715	0	-0.1584
Neoplasm of uncertain behavior of male genital organs	neoplasms	-0.3326	-2.933	2.268	1.327	-0.251	0.717057	0.0532371	9.66006	10	6521	10	8343	0.802068	0.887309	not_significant	-0.144446	0.0957887	1.4326	1.234	1.631	0.101	14.14	0	-0.0498	-0.055	-0.045	0.002	-20.546	0	0.4428	0.306	0.58	0.07	6.348	0	0.2903	0.178	0.403	0.057	5.069	0	1.1259	1.019	1.233	0.054	20.701	0	-0.1534
Neoplasm of uncertain behavior of skin	neoplasms	0.0519	-0.149	0.253	0.103	0.506	1.05327	0.861569	1.28788	186	6345	249	8104	0.61286	0.765785	not_significant	0.0225399	0.212639	1.4333	1.235	1.632	0.101	14.149	0	-0.0499	-0.055	-0.045	0.002	-20.552	0	0.4434	0.307	0.58	0.07	6.355	0	0.2905	0.178	0.403	0.057	5.072	0	1.1264	1.02	1.233	0.054	20.705	0	-0.1525
Neoplasm of unspecified nature of digestive system	neoplasms	-0.7778	-2.067	0.512	0.658	-1.182	0.459416	0.126565	1.66863	10	6521	11	8342	0.237098	0.422431	not_significant	-0.337794	0.625072	1.4332	1.235	1.632	0.101	14.149	0	-0.0498	-0.055	-0.045	0.002	-20.546	0	0.4429	0.306	0.58	0.07	6.348	0	0.29	0.178	0.402	0.057	5.064	0	1.1248	1.018	1.231	0.054	20.678	0	-0.1538
Nephritis and nephropathy with pathological lesion	genitourinary	1.215	0.116	2.314	0.561	2.167	3.37029	1.123	10.1148	11	6520	10	8343	0.030232	0.10381	not_significant	0.527668	1.51953	1.4342	1.236	1.633	0.101	14.151	0	-0.0499	-0.055	-0.045	0.002	-20.578	0	0.4425	0.306	0.579	0.07	6.34	0	0.2911	0.179	0.403	0.057	5.083	0	1.1273	1.021	1.234	0.054	20.721	0	-0.1515
Nephrotic syndrome without mention of glomerulonephritis	genitourinary	2.2347	0.667	3.802	0.8	2.794	9.34368	1.94838	44.7907	10	6521	10	8343	0.0052049	0.0295317	mi_significant	0.970518	2.28359	1.4386	1.24	1.637	0.101	14.188	0	-0.05	-0.055	-0.045	0.002	-20.606	0	0.442	0.305	0.579	0.07	6.332	0	0.2911	0.179	0.403	0.057	5.082	0	1.1265	1.02	1.233	0.054	20.706	0	-0.1534
Nerve plexus lesions	neurological	0.6613	-0.228	1.551	0.454	1.457	1.93731	0.796124	4.71618	11	6520	10	8343	0.145009	0.31171	not_significant	0.287199	0.838606	1.4323	1.234	1.631	0.101	14.14	0	-0.0498	-0.055	-0.045	0.002	-20.558	0	0.4429	0.306	0.58	0.07	6.349	0	0.2912	0.179	0.403	0.057	5.085	0	1.1265	1.02	1.233	0.054	20.709	0	-0.1543
Nerve root and plexus disorders	neurological	-0.3071	-1.268	0.654	0.49	-0.626	0.735577	0.281394	1.92322	10	6521	14	8339	0.531165	0.713441	not_significant	-0.133372	0.274771	1.434	1.235	1.633	0.101	14.153	0	-0.0498	-0.055	-0.045	0.002	-20.546	0	0.4412	0.304	0.578	0.07	6.322	0	0.2891	0.177	0.401	0.057	5.045	0	1.1246	1.018	1.231	0.054	20.665	0	-0.1548
Nerve root lesions	neurological	0.7134	-0.609	2.036	0.675	1.058	2.04092	0.543894	7.65991	10	6521	10	8343	0.29025	0.491936	not_significant	0.309826	0.537228	1.433	1.234	1.632	0.101	14.146	0	-0.0499	-0.055	-0.045	0.002	-20.566	0	0.444	0.307	0.581	0.07	6.363	0	0.2906	0.178	0.403	0.057	5.074	0	1.1271	1.02	1.234	0.054	20.717	0	-0.1524
Nervous system congenital anomalies	congenital anomalies	-0.1944	-2.467	2.078	1.159	-0.168	0.823329	0.084839	7.98848	10	6521	10	8343	0.866823	0.927136	not_significant	-0.0844268	0.0620694	1.4327	1.234	1.631	0.101	14.141	0	-0.0498	-0.055	-0.045	0.002	-20.546	0	0.4427	0.306	0.579	0.07	6.346	0	0.2903	0.178	0.403	0.057	5.069	0	1.1258	1.019	1.232	0.054	20.699	0	-0.1533
Neural tube defects	congenital anomalies	0.2261	-2.93	3.382	1.61	0.14	1.2537	0.053397	29.4296	10	6521	10	8343	0.888328	0.942428	not_significant	0.098194	0.0514268	1.4331	1.235	1.632	0.101	14.146	0	-0.0498	-0.055	-0.045	0.002	-20.553	0	0.4427	0.306	0.579	0.07	6.346	0	0.2901	0.178	0.402	0.057	5.066	0	1.1258	1.019	1.232	0.054	20.698	0	-0.1534
Neuralgia, neuritis, and radiculitis NOS	symptoms	0.4625	0.11	0.815	0.18	2.571	1.58804	1.11628	2.25918	67	6464	72	8281	0.0101484	0.0480867	mi_significant	0.200861	1.9936	1.4397	1.241	1.638	0.101	14.204	0	-0.0501	-0.055	-0.045	0.002	-20.644	0	0.4451	0.308	0.582	0.07	6.379	0	0.2897	0.177	0.402	0.057	5.058	0	1.1281	1.021	1.235	0.054	20.732	0	-0.153
Neuroendocrine tumors	neoplasms	-0.2888	-1.983	1.405	0.864	-0.334	0.749162	0.137656	4.07553	10	6521	10	8343	0.738277	0.850248	not_significant	-0.125424	0.131781	1.4325	1.234	1.631	0.101	14.14	0	-0.0498	-0.055	-0.045	0.002	-20.544	0	0.4428	0.306	0.58	0.07	6.347	0	0.2902	0.178	0.402	0.057	5.068	0	1.1258	1.019	1.232	0.054	20.699	0	-0.1534
Neurological disorders	mental disorders	-0.152	-0.544	0.24	0.2	-0.76	0.858988	0.580422	1.27125	45	6486	75	8278	0.447008	0.649783	not_significant	-0.0660128	0.349685	1.4333	1.235	1.632	0.101	14.148	0	-0.0498	-0.055	-0.045	0.002	-20.544	0	0.4421	0.305	0.579	0.07	6.337	0	0.2904	0.178	0.403	0.057	5.071	0	1.1259	1.019	1.233	0.054	20.7	0	-0.1527
Neutropenia	hematopoietic	0.3915	-0.098	0.881	0.25	1.568	1.4792	0.906649	2.41331	37	6494	35	8318	0.116782	0.266965	not_significant	0.170026	0.932626	1.4328	1.234	1.631	0.101	14.142	0	-0.0499	-0.055	-0.045	0.002	-20.559	0	0.4426	0.306	0.579	0.07	6.345	0	0.2899	0.178	0.402	0.057	5.061	0	1.125	1.018	1.232	0.054	20.682	0	-0.1551
Nevus, non-neoplastic	neoplasms	0.0434	-0.242	0.328	0.145	0.298	1.04436	0.785056	1.38819	90	6441	125	8228	0.765411	0.86411	not_significant	0.0188484	0.116106	1.4337	1.235	1.632	0.101	14.149	0	-0.0499	-0.055	-0.045	0.002	-20.535	0	0.4433	0.307	0.58	0.07	6.352	0	0.2896	0.177	0.402	0.057	5.054	0	1.1263	1.02	1.233	0.054	20.699	0	-0.1526
Nodular lymphoma	neoplasms	1.1254	-1.658	3.909	1.42	0.792	3.08145	0.19052	49.8491	10	6521	10	8343	0.428118	0.633787	not_significant	0.488755	0.368437	1.4359	1.237	1.635	0.101	14.164	0	-0.0499	-0.055	-0.045	0.002	-20.566	0	0.4428	0.306	0.58	0.07	6.347	0	0.2898	0.178	0.402	0.057	5.061	0	1.1257	1.019	1.232	0.054	20.696	0	-0.1533
Non-Hodgkins lymphoma	neoplasms	0.4833	-0.281	1.247	0.39	1.24	1.62142	0.755028	3.47989	16	6515	14	8339	0.215085	0.403205	not_significant	0.209895	0.66739	1.4334	1.235	1.632	0.101	14.151	0	-0.0499	-0.055	-0.045	0.002	-20.566	0	0.443	0.306	0.58	0.07	6.351	0	0.2902	0.178	0.402	0.057	5.067	0	1.1254	1.019	1.232	0.054	20.691	0	-0.1539
Non-proliferative glomerulonephritis	genitourinary	2.3654	0.236	4.495	1.086	2.178	10.6483	1.26617	89.5682	10	6521	10	8343	0.0294431	0.103246	not_significant	1.02728	1.53102	1.4359	1.237	1.635	0.101	14.168	0	-0.0499	-0.055	-0.045	0.002	-20.581	0	0.4436	0.307	0.58	0.07	6.359	0	0.2894	0.177	0.402	0.057	5.053	0	1.1255	1.019	1.232	0.054	20.688	0	-0.1534
Nonallopathic lesions NEC	symptoms	-0.4462	-1.178	0.286	0.373	-1.195	0.640056	0.307894	1.33109	11	6520	24	8329	0.232162	0.419861	not_significant	-0.193782	0.634209	1.433	1.234	1.632	0.101	14.146	0	-0.0498	-0.055	-0.045	0.002	-20.548	0	0.4422	0.305	0.579	0.07	6.339	0	0.2934	0.181	0.406	0.057	5.118	0	1.1256	1.019	1.232	0.054	20.695	0	-0.1532
Noninfectious dermatoses of eyelid	sense organs	0.2796	-0.954	1.513	0.629	0.444	1.3226	0.385197	4.54033	10	6521	10	8343	0.656867	0.791593	not_significant	0.121429	0.182523	1.4328	1.234	1.631	0.101	14.144	0	-0.0498	-0.055	-0.045	0.002	-20.552	0	0.4426	0.306	0.579	0.07	6.345	0	0.2901	0.178	0.402	0.057	5.066	0	1.1256	1.019	1.232	0.054	20.694	0	-0.1534
Noninfectious disorders of lymphatic channels	circulatory system	0.7366	-0.39	1.863	0.575	1.281	2.08882	0.677057	6.44304	10	6521	10	8343	0.200129	0.387666	not_significant	0.319901	0.69869	1.4342	1.236	1.633	0.101	14.157	0	-0.0499	-0.055	-0.045	0.002	-20.571	0	0.4426	0.306	0.579	0.07	6.345	0	0.2893	0.177	0.402	0.057	5.052	0	1.1268	1.02	1.233	0.054	20.713	0	-0.1528
Noninfectious gastroenteritis	digestive	0.365	0.074	0.656	0.148	2.458	1.44051	1.07681	1.92707	97	6434	101	8252	0.0139766	0.0607796	not_significant	0.158517	1.8546	1.4259	1.227	1.625	0.101	14.07	0	-0.0499	-0.055	-0.045	0.002	-20.559	0	0.4479	0.311	0.585	0.07	6.415	0	0.2936	0.181	0.406	0.057	5.123	0	1.1309	1.024	1.238	0.054	20.77	0	-0.1513
Nonrheumatic aortic valve disorders	circulatory system	1.0843	0.462	1.706	0.317	3.416	2.95737	1.58725	5.50689	25	6506	20	8333	0.000636233	0.00632406	mi_significant	0.470906	3.19638	1.4521	1.253	1.651	0.102	14.298	0	-0.0504	-0.055	-0.046	0.002	-20.721	0	0.4448	0.308	0.582	0.07	6.374	0	0.2914	0.179	0.404	0.057	5.086	0	1.1285	1.022	1.235	0.054	20.738	0	-0.1525
Nonrheumatic mitral valve disorders	circulatory system	1.0007	0.392	1.609	0.31	3.223	2.72019	1.47994	4.99781	28	6503	19	8334	0.00126654	0.0105306	mi_significant	0.434598	2.89738	1.4383	1.24	1.637	0.101	14.189	0	-0.0501	-0.055	-0.045	0.002	-20.631	0	0.4435	0.307	0.58	0.07	6.356	0	0.2918	0.18	0.404	0.057	5.094	0	1.129	1.022	1.236	0.054	20.746	0	-0.1526
Nonrheumatic pulmonary valve disorders	circulatory system	1.7877	0.209	3.366	0.806	2.219	5.97569	1.23244	28.9624	10	6521	10	8343	0.026459	0.0971632	not_significant	0.776388	1.57743	1.4314	1.233	1.63	0.101	14.126	0	-0.0499	-0.055	-0.045	0.002	-20.565	0	0.4461	0.309	0.583	0.07	6.392	0	0.2916	0.179	0.404	0.057	5.09	0	1.1292	1.023	1.236	0.054	20.749	0	-0.1504
Nonrheumatic tricuspid valve disorders	circulatory system	0.889	0.007	1.771	0.45	1.976	2.4327	1.00702	5.87673	12	6519	10	8343	0.048151	0.143368	not_significant	0.386088	1.31739	1.4309	1.232	1.629	0.101	14.12	0	-0.0499	-0.055	-0.045	0.002	-20.573	0	0.4456	0.309	0.582	0.07	6.385	0	0.2947	0.182	0.407	0.057	5.141	0	1.1308	1.024	1.238	0.054	20.763	0	-0.1491
Nonsenile Cataract	sense organs	0.7409	-1.272	2.754	1.027	0.721	2.09782	0.280271	15.7053	10	6521	10	8343	0.47074	0.67059	not_significant	0.321769	0.327219	1.4344	1.236	1.633	0.101	14.156	0	-0.0499	-0.055	-0.045	0.002	-20.561	0	0.4411	0.304	0.578	0.07	6.319	0	0.2902	0.178	0.402	0.057	5.068	0	1.1259	1.019	1.233	0.054	20.7	0	-0.1535
Nonspecific abnormal findings in stool contents	digestive	0.4851	0.115	0.856	0.189	2.567	1.62434	1.12187	2.35373	62	6469	61	8292	0.010269	0.0483117	mi_significant	0.210676	1.98847	1.4356	1.237	1.634	0.101	14.168	0	-0.05	-0.055	-0.045	0.002	-20.611	0	0.4445	0.308	0.581	0.07	6.371	0	0.2883	0.176	0.401	0.057	5.033	0	1.1277	1.021	1.234	0.054	20.727	0	-0.1536
Nonspecific abnormal findings on radiological and other examination of biliary tract	digestive	0.5544	-0.035	1.144	0.301	1.843	1.7409	0.965605	3.1393	24	6507	23	8330	0.0653439	0.176961	not_significant	0.240773	1.18479	1.4324	1.234	1.631	0.101	14.138	0	-0.0499	-0.055	-0.045	0.002	-20.588	0	0.4442	0.307	0.581	0.07	6.367	0	0.2924	0.18	0.405	0.057	5.104	0	1.1303	1.024	1.237	0.054	20.756	0	-0.1491
Nonspecific abnormal findings on radiological and other examination of musculoskeletal system	symptoms	0.108	-0.393	0.609	0.255	0.423	1.11405	0.675029	1.83859	29	6502	38	8315	0.67254	0.79883	not_significant	0.0469038	0.172282	1.4322	1.234	1.631	0.101	14.136	0	-0.0498	-0.055	-0.045	0.002	-20.556	0	0.4437	0.307	0.58	0.07	6.357	0	0.2904	0.178	0.403	0.057	5.071	0	1.1267	1.02	1.233	0.054	20.7	0	-0.1525
Nonspecific abnormal findings on radiological and other examination of other intrathoracic organs (echocardiogram, etc)	symptoms	0.4318	-0.077	0.941	0.26	1.663	1.54003	0.92589	2.56254	30	6501	36	8317	0.0963394	0.231145	not_significant	0.187528	1.0162	1.4384	1.24	1.637	0.101	14.19	0	-0.05	-0.055	-0.045	0.002	-20.603	0	0.4435	0.307	0.58	0.07	6.357	0	0.2903	0.178	0.403	0.057	5.069	0	1.1269	1.02	1.234	0.054	20.715	0	-0.153
Nonspecific abnormal findings on radiological and other examination of skull and head	neurological	0.89	0.212	1.568	0.346	2.571	2.43513	1.23615	4.79704	22	6509	16	8337	0.0101321	0.0480867	mi_significant	0.386522	1.9943	1.4384	1.24	1.637	0.101	14.192	0	-0.05	-0.055	-0.045	0.002	-20.615	0	0.4406	0.304	0.577	0.07	6.314	0	0.2908	0.179	0.403	0.057	5.077	0	1.1269	1.02	1.234	0.054	20.712	0	-0.1537
Nonspecific abnormal results of function study of brain and central nervous system	neurological	0.7494	-1.665	3.164	1.232	0.608	2.11573	0.189191	23.6651	10	6521	10	8343	0.542967	0.720685	not_significant	0.32546	0.265226	1.4317	1.233	1.63	0.101	14.13	0	-0.0498	-0.055	-0.045	0.002	-20.544	0	0.4427	0.306	0.579	0.07	6.346	0	0.2908	0.179	0.403	0.057	5.077	0	1.1264	1.02	1.233	0.054	20.706	0	-0.1528
Nonspecific chest pain	circulatory system	0.2495	0.105	0.394	0.074	3.376	1.28338	1.11071	1.4829	388	6143	473	7880	0.000735734	0.00699742	mi_significant	0.108356	3.13328	1.4277	1.229	1.626	0.101	14.085	0	-0.0502	-0.055	-0.045	0.002	-20.663	0	0.4533	0.316	0.59	0.07	6.49	0	0.2982	0.186	0.411	0.057	5.201	0	1.135	1.028	1.242	0.054	20.829	0	-0.153
Nonspecific elevation of levels of transaminase or lactic acid dehydrogenase [LDH]	digestive	0.3527	0.093	0.612	0.132	2.667	1.4229	1.09746	1.84412	132	6399	122	8231	0.00765301	0.0395206	mi_significant	0.153176	2.11617	1.4274	1.229	1.626	0.101	14.085	0	-0.0499	-0.055	-0.045	0.002	-20.563	0	0.4452	0.308	0.582	0.07	6.38	0	0.2857	0.173	0.398	0.057	4.984	0	1.1288	1.022	1.235	0.054	20.741	0	-0.15
Nonspecific findings on examination of blood	symptoms	0.4151	0.115	0.716	0.153	2.707	1.51452	1.12187	2.04623	89	6442	99	8254	0.00678508	0.0360627	mi_significant	0.180276	2.16844	1.4368	1.238	1.635	0.101	14.183	0	-0.0502	-0.055	-0.045	0.002	-20.663	0	0.4501	0.313	0.587	0.07	6.447	0	0.2902	0.178	0.403	0.057	5.066	0	1.1325	1.026	1.239	0.054	20.794	0	-0.1479
Nontoxic multinodular goiter	endocrine/metabolic	0.5431	-0.172	1.258	0.365	1.488	1.72133	0.841979	3.51838	16	6515	16	8337	0.136644	0.29809	not_significant	0.235865	0.864411	1.4327	1.234	1.631	0.101	14.142	0	-0.0499	-0.055	-0.045	0.002	-20.562	0	0.4426	0.306	0.579	0.07	6.343	0	0.2905	0.178	0.403	0.057	5.072	0	1.1273	1.021	1.234	0.054	20.72	0	-0.1534
Nontoxic nodular goiter	endocrine/metabolic	0.8577	0.049	1.666	0.413	2.079	2.35773	1.05022	5.29096	15	6516	11	8342	0.0376381	0.121657	not_significant	0.372494	1.42437	1.433	1.234	1.632	0.101	14.145	0	-0.0499	-0.055	-0.045	0.002	-20.561	0	0.4425	0.306	0.579	0.07	6.342	0	0.2906	0.178	0.403	0.057	5.075	0	1.1263	1.02	1.233	0.054	20.705	0	-0.1554
Nontoxic uninodular goiter	endocrine/metabolic	0.8909	0.388	1.394	0.257	3.471	2.43732	1.47403	4.03094	38	6493	31	8322	0.000519087	0.0053612	mi_significant	0.386913	3.28476	1.4437	1.245	1.642	0.101	14.244	0	-0.0502	-0.055	-0.045	0.002	-20.681	0	0.4434	0.307	0.58	0.07	6.354	0	0.2893	0.177	0.402	0.057	5.05	0	1.1277	1.021	1.234	0.054	20.724	0	-0.1553
Nystagmus and other irregular eye movements	sense organs	0.6606	-0.752	2.073	0.721	0.917	1.93595	0.471423	7.94863	10	6521	10	8343	0.359324	0.564164	not_significant	0.286895	0.444514	1.4348	1.236	1.633	0.101	14.158	0	-0.0499	-0.055	-0.045	0.002	-20.564	0	0.4432	0.307	0.58	0.07	6.353	0	0.2904	0.178	0.403	0.057	5.072	0	1.1257	1.019	1.232	0.054	20.697	0	-0.1531
Obesity	endocrine/metabolic	0.3136	0.142	0.485	0.088	3.581	1.36834	1.15258	1.62418	279	6252	311	8042	0.000342629	0.00393874	mi_significant	0.136195	3.46518	1.4331	1.234	1.632	0.101	14.136	0	-0.0502	-0.055	-0.045	0.002	-20.663	0	0.4443	0.307	0.581	0.07	6.366	0	0.2897	0.177	0.402	0.057	5.056	0	1.1324	1.026	1.239	0.054	20.798	0	-0.1528
Obsessive-compulsive disorders	mental disorders	0.1973	-0.822	1.217	0.52	0.379	1.21811	0.439552	3.37704	10	6521	10	8343	0.704363	0.828441	not_significant	0.0856863	0.152204	1.4325	1.234	1.631	0.101	14.14	0	-0.0498	-0.055	-0.045	0.002	-20.548	0	0.4429	0.306	0.58	0.07	6.348	0	0.29	0.178	0.402	0.057	5.063	0	1.1258	1.019	1.232	0.054	20.699	0	-0.1535
Obstruction of bile duct	digestive	1.3208	0.051	2.591	0.648	2.038	3.74642	1.05232	13.3431	10	6521	10	8343	0.0415225	0.130476	not_significant	0.573616	1.38172	1.4356	1.237	1.634	0.101	14.166	0	-0.0499	-0.055	-0.045	0.002	-20.584	0	0.4423	0.306	0.579	0.07	6.339	0	0.2908	0.179	0.403	0.057	5.077	0	1.1274	1.021	1.234	0.054	20.724	0	-0.153
Obstructive chronic bronchitis	respiratory	-0.4793	-2.682	1.723	1.124	-0.427	0.619217	0.0684262	5.60131	10	6521	10	8343	0.669718	0.798347	not_significant	-0.208157	0.174108	1.4321	1.234	1.631	0.101	14.134	0	-0.0498	-0.055	-0.045	0.002	-20.536	0	0.4429	0.306	0.58	0.07	6.349	0	0.2901	0.178	0.402	0.057	5.065	0	1.1257	1.019	1.232	0.054	20.696	0	-0.1533
Obstructive sleep apnea	neurological	0.102	-0.074	0.278	0.09	1.138	1.10738	0.928672	1.32049	248	6283	326	8027	0.2553	0.447842	not_significant	0.044298	0.59295	1.4331	1.235	1.632	0.101	14.146	0	-0.05	-0.055	-0.045	0.002	-20.579	0	0.4446	0.308	0.581	0.07	6.371	0	0.2907	0.178	0.403	0.057	5.076	0	1.1276	1.021	1.234	0.054	20.721	0	-0.152
Occlusion and stenosis of precerebral arteries	circulatory system	0.8493	0.149	1.549	0.357	2.378	2.33801	1.16067	4.70676	18	6513	17	8336	0.0173982	0.0718762	not_significant	0.368846	1.7595	1.4459	1.247	1.645	0.101	14.248	0	-0.0502	-0.055	-0.045	0.002	-20.653	0	0.4411	0.304	0.578	0.07	6.323	0	0.2908	0.179	0.403	0.057	5.078	0	1.1259	1.019	1.233	0.054	20.696	0	-0.154
Occlusion of cerebral arteries	circulatory system	0.128	-2.312	2.568	1.245	0.103	1.13655	0.0990629	13.0397	10	6521	10	8343	0.91808	0.960051	not_significant	0.0555897	0.0371194	1.4331	1.235	1.632	0.101	14.145	0	-0.0498	-0.055	-0.045	0.002	-20.551	0	0.4427	0.306	0.579	0.07	6.346	0	0.2901	0.178	0.402	0.057	5.065	0	1.1258	1.019	1.232	0.054	20.699	0	-0.1534
Occlusion of cerebral arteries, with cerebral infarction	circulatory system	0.5558	-0.81	1.922	0.697	0.797	1.74334	0.444858	6.83461	10	6521	10	8343	0.42521	0.631083	not_significant	0.241381	0.371396	1.4348	1.236	1.633	0.101	14.159	0	-0.0499	-0.055	-0.045	0.002	-20.563	0	0.4423	0.306	0.579	0.07	6.341	0	0.2898	0.178	0.402	0.057	5.06	0	1.1257	1.019	1.232	0.054	20.697	0	-0.1538
Oliguria and anuria	genitourinary	1.2711	-0.672	3.214	0.991	1.282	3.56477	0.510686	24.8784	10	6521	10	8343	0.199734	0.387666	not_significant	0.552032	0.699547	1.4334	1.235	1.632	0.101	14.151	0	-0.0499	-0.055	-0.045	0.002	-20.564	0	0.4432	0.306	0.58	0.07	6.353	0	0.2902	0.178	0.402	0.057	5.067	0	1.1263	1.02	1.233	0.054	20.707	0	-0.1536
Open wound of finger(s)	injuries & poisonings	-0.0283	-0.433	0.376	0.206	-0.137	0.972097	0.64856	1.45645	42	6489	64	8289	0.890918	0.942989	not_significant	-0.0122905	0.0501623	1.4331	1.235	1.632	0.101	14.146	0	-0.0498	-0.055	-0.045	0.002	-20.55	0	0.4426	0.306	0.579	0.07	6.343	0	0.2902	0.178	0.402	0.057	5.068	0	1.1257	1.019	1.232	0.054	20.696	0	-0.1534
Open wound of foot except toe(s) alone	injuries & poisonings	0.3938	-0.363	1.151	0.386	1.019	1.4826	0.695586	3.16135	13	6518	15	8338	0.308109	0.510426	not_significant	0.171025	0.511296	1.4327	1.234	1.631	0.101	14.141	0	-0.0499	-0.055	-0.045	0.002	-20.557	0	0.4435	0.307	0.58	0.07	6.357	0	0.2902	0.178	0.402	0.057	5.067	0	1.1268	1.02	1.233	0.054	20.713	0	-0.1533
Open wound of genital organs	injuries & poisonings	0.7341	-1.116	2.584	0.944	0.778	2.08361	0.327588	13.25	10	6521	10	8343	0.436652	0.640681	not_significant	0.318816	0.359865	1.4329	1.234	1.632	0.101	14.144	0	-0.0498	-0.055	-0.045	0.002	-20.55	0	0.4411	0.304	0.578	0.07	6.321	0	0.2902	0.178	0.402	0.057	5.068	0	1.1258	1.019	1.232	0.054	20.699	0	-0.1537
Open wound of hand except finger(s)	injuries & poisonings	0.2013	-0.394	0.797	0.304	0.662	1.22299	0.674354	2.21887	20	6511	26	8327	0.507754	0.697766	not_significant	0.0874235	0.294347	1.4321	1.234	1.631	0.101	14.136	0	-0.0498	-0.055	-0.045	0.002	-20.551	0	0.4435	0.307	0.58	0.07	6.356	0	0.2903	0.178	0.403	0.057	5.07	0	1.1264	1.02	1.233	0.054	20.707	0	-0.1536
Open wound of lip and mouth	injuries & poisonings	0.5924	-0.434	1.618	0.523	1.132	1.80832	0.647912	5.04299	10	6521	10	8343	0.257808	0.448451	not_significant	0.257276	0.588703	1.4337	1.235	1.632	0.101	14.151	0	-0.0499	-0.055	-0.045	0.002	-20.566	0	0.4439	0.307	0.581	0.07	6.362	0	0.2911	0.179	0.403	0.057	5.083	0	1.1266	1.02	1.233	0.054	20.71	0	-0.153
Open wound of neck	injuries & poisonings	-0.6905	-3.474	2.093	1.42	-0.486	0.501325	0.0309928	8.10921	10	6521	10	8343	0.626772	0.776333	not_significant	-0.29988	0.20289	1.4332	1.235	1.632	0.101	14.147	0	-0.0498	-0.055	-0.045	0.002	-20.554	0	0.4427	0.306	0.579	0.07	6.346	0	0.2902	0.178	0.402	0.057	5.068	0	1.1263	1.02	1.233	0.054	20.704	0	-0.1534
Open wound of nose and sinus	injuries & poisonings	0.4599	-1.399	2.318	0.948	0.485	1.58392	0.246844	10.1553	10	6521	10	8343	0.62767	0.776333	not_significant	0.199732	0.202269	1.4327	1.234	1.631	0.101	14.143	0	-0.0498	-0.055	-0.045	0.002	-20.551	0	0.4429	0.306	0.58	0.07	6.349	0	0.2902	0.178	0.402	0.057	5.067	0	1.1258	1.019	1.232	0.054	20.698	0	-0.1533
Open wound of toe(s)	injuries & poisonings	0.3058	-0.715	1.327	0.521	0.587	1.35771	0.489192	3.76972	10	6521	10	8343	0.557288	0.726799	not_significant	0.132807	0.25392	1.4326	1.234	1.631	0.101	14.143	0	-0.0498	-0.055	-0.045	0.002	-20.554	0	0.4429	0.306	0.58	0.07	6.349	0	0.2904	0.178	0.403	0.057	5.072	0	1.1261	1.019	1.233	0.054	20.703	0	-0.1537
Open wound or laceration of eye or eyelid	injuries & poisonings	-0.4344	-1.338	0.469	0.461	-0.942	0.647653	0.26237	1.59839	10	6521	16	8337	0.34602	0.551131	not_significant	-0.188658	0.460899	1.4343	1.236	1.633	0.101	14.157	0	-0.0498	-0.055	-0.045	0.002	-20.554	0	0.4425	0.306	0.579	0.07	6.343	0	0.2902	0.178	0.402	0.057	5.067	0	1.1246	1.018	1.231	0.054	20.672	0	-0.1542
Open wounds of extremities	injuries & poisonings	0.1403	-0.351	0.632	0.251	0.56	1.15062	0.703984	1.88137	29	6502	44	8309	0.575815	0.740493	not_significant	0.0609315	0.239717	1.4341	1.236	1.633	0.101	14.154	0	-0.0499	-0.055	-0.045	0.002	-20.56	0	0.4427	0.306	0.579	0.07	6.346	0	0.2899	0.178	0.402	0.057	5.061	0	1.1262	1.02	1.233	0.054	20.704	0	-0.1535
Open wounds of head; neck; and trunk	injuries & poisonings	0.9768	0.332	1.622	0.329	2.968	2.65594	1.39375	5.06321	26	6505	16	8337	0.00299782	0.02022	mi_significant	0.424219	2.52319	1.4295	1.231	1.628	0.101	14.108	0	-0.0499	-0.055	-0.045	0.002	-20.568	0	0.4466	0.31	0.583	0.07	6.399	0	0.2917	0.179	0.404	0.057	5.09	0	1.1304	1.024	1.237	0.054	20.768	0	-0.1508
Open-angle glaucoma	sense organs	0.0326	-1.067	1.132	0.561	0.058	1.03314	0.344039	3.10185	10	6521	10	8343	0.953701	0.981925	not_significant	0.014158	0.020588	1.4332	1.235	1.632	0.101	14.141	0	-0.0498	-0.055	-0.045	0.002	-20.542	0	0.4426	0.306	0.579	0.07	6.343	0	0.2902	0.178	0.402	0.057	5.068	0	1.1258	1.019	1.232	0.054	20.698	0	-0.1534
Opiates and related narcotics causing adverse effects in therapeutic use	injuries & poisonings	0.8214	-0.07	1.713	0.455	1.807	2.27368	0.932394	5.54557	14	6517	10	8343	0.070795	0.186066	not_significant	0.356729	1.15	1.4342	1.236	1.633	0.101	14.155	0	-0.0499	-0.055	-0.045	0.002	-20.567	0	0.4417	0.305	0.578	0.07	6.331	0	0.2883	0.176	0.401	0.057	5.033	0	1.1259	1.019	1.232	0.054	20.697	0	-0.1536
Optic atrophy	sense organs	0.5614	-0.424	1.547	0.503	1.116	1.75313	0.654424	4.69736	10	6521	10	8343	0.264381	0.457476	not_significant	0.243813	0.577769	1.436	1.237	1.635	0.101	14.169	0	-0.0499	-0.055	-0.045	0.002	-20.576	0	0.4412	0.304	0.578	0.07	6.323	0	0.2902	0.178	0.402	0.057	5.067	0	1.1267	1.02	1.233	0.054	20.711	0	-0.1526
Optic neuritis/neuropathy	sense organs	0.98	-0.009	1.969	0.505	1.942	2.66446	0.99104	7.16351	10	6521	10	8343	0.0521109	0.150416	not_significant	0.425609	1.28307	1.4385	1.24	1.637	0.101	14.19	0	-0.05	-0.055	-0.045	0.002	-20.606	0	0.4432	0.306	0.58	0.07	6.352	0	0.2918	0.18	0.404	0.057	5.094	0	1.127	1.02	1.234	0.054	20.716	0	-0.1524
Oral aphthae	digestive	-0.5602	-1.446	0.325	0.452	-1.24	0.571095	0.23551	1.38403	10	6521	17	8336	0.21509	0.403205	not_significant	-0.243292	0.66738	1.435	1.236	1.634	0.101	14.163	0	-0.0499	-0.055	-0.045	0.002	-20.564	0	0.4428	0.306	0.58	0.07	6.348	0	0.2905	0.178	0.403	0.057	5.072	0	1.1257	1.019	1.232	0.054	20.697	0	-0.1531
Orchitis and epididymitis	genitourinary	-0.9602	-1.397	-0.523	0.223	-4.307	0.382816	0.247338	0.59274	27	6504	100	8253	1.65296e-05	0.000383428	con_significant	-0.41701	4.78174	1.4449	1.246	1.644	0.101	14.248	0	-0.0499	-0.055	-0.045	0.002	-20.554	0	0.4401	0.303	0.577	0.07	6.303	0	0.2855	0.173	0.398	0.057	4.98	0	1.1193	1.013	1.226	0.054	20.559	0	-0.1557
Organic or persistent insomnia	neurological	-0.2228	-0.581	0.136	0.183	-1.218	0.800275	0.559339	1.14568	47	6484	104	8249	0.223276	0.410093	not_significant	-0.0967608	0.651158	1.4305	1.232	1.629	0.101	14.119	0	-0.0497	-0.054	-0.045	0.002	-20.497	0	0.4417	0.305	0.578	0.07	6.331	0	0.2893	0.177	0.402	0.057	5.052	0	1.1254	1.019	1.232	0.054	20.691	0	-0.1513
Orthopnea	respiratory	2.1405	0.555	3.726	0.809	2.645	8.50369	1.74194	41.5127	10	6521	10	8343	0.00815889	0.0410116	mi_significant	0.929607	2.08837	1.4345	1.236	1.633	0.101	14.154	0	-0.0499	-0.055	-0.045	0.002	-20.572	0	0.4432	0.306	0.58	0.07	6.351	0	0.2896	0.177	0.402	0.057	5.054	0	1.1264	1.02	1.233	0.054	20.704	0	-0.1536
Orthostatic hypotension	circulatory system	0.6901	-0.044	1.424	0.374	1.844	1.99391	0.956954	4.1537	17	6514	16	8337	0.0652452	0.176961	not_significant	0.299707	1.18545	1.4364	1.238	1.635	0.101	14.179	0	-0.05	-0.055	-0.045	0.002	-20.6	0	0.443	0.306	0.58	0.07	6.348	0	0.2902	0.178	0.402	0.057	5.068	0	1.1267	1.02	1.233	0.054	20.712	0	-0.1532
Osteitis deformans and osteopathies associated with other disorders classified elsewhere	musculoskeletal	1.9219	0.267	3.577	0.845	2.276	6.83393	1.30604	35.7661	10	6521	10	8343	0.0228665	0.0865804	not_significant	0.834671	1.6408	1.4402	1.241	1.639	0.101	14.207	0	-0.05	-0.055	-0.045	0.002	-20.611	0	0.4429	0.306	0.58	0.07	6.349	0	0.2876	0.175	0.4	0.057	5.021	0	1.125	1.018	1.232	0.054	20.68	0	-0.1539
Osteoarthritis; localized	musculoskeletal	0.5152	-0.236	1.267	0.383	1.344	1.67397	0.789781	3.55019	16	6515	15	8338	0.178948	0.357355	not_significant	0.223749	0.747274	1.437	1.238	1.636	0.101	14.178	0	-0.05	-0.055	-0.045	0.002	-20.588	0	0.4435	0.307	0.58	0.07	6.357	0	0.2898	0.178	0.402	0.057	5.06	0	1.1258	1.019	1.232	0.054	20.697	0	-0.1524
Osteoarthrosis		0.6666	-2.16	3.493	1.442	0.462	1.9476	0.115325	32.8845	10	6521	10	8343	0.643979	0.783402	not_significant	0.289501	0.191128	1.4332	1.235	1.632	0.101	14.148	0	-0.0498	-0.055	-0.045	0.002	-20.554	0	0.4427	0.306	0.579	0.07	6.346	0	0.2899	0.178	0.402	0.057	5.063	0	1.1258	1.019	1.232	0.054	20.699	0	-0.1535
Osteoarthrosis NOS	musculoskeletal	0.2512	-0.108	0.61	0.183	1.371	1.28557	0.897628	1.84043	57	6474	79	8274	0.17038	0.345357	not_significant	0.109095	0.76858	1.4386	1.24	1.637	0.101	14.188	0	-0.05	-0.055	-0.045	0.002	-20.592	0	0.4435	0.307	0.58	0.07	6.357	0	0.289	0.177	0.401	0.057	5.046	0	1.1265	1.02	1.233	0.054	20.709	0	-0.1539
Osteoarthrosis, generalized	musculoskeletal	0.4309	-0.514	1.375	0.482	0.894	1.53864	0.598098	3.95508	10	6521	12	8341	0.371254	0.578468	not_significant	0.187137	0.430329	1.4344	1.236	1.633	0.101	14.16	0	-0.0499	-0.055	-0.045	0.002	-20.572	0	0.4432	0.306	0.58	0.07	6.353	0	0.2904	0.178	0.403	0.057	5.071	0	1.1269	1.02	1.233	0.054	20.713	0	-0.1529
Osteoarthrosis, localized, primary	musculoskeletal	0.1411	-0.038	0.321	0.092	1.541	1.15154	0.962713	1.37851	220	6311	357	7996	0.123409	0.277933	not_significant	0.061279	0.908653	1.4435	1.244	1.643	0.102	14.21	0	-0.0503	-0.055	-0.045	0.002	-20.573	0	0.4449	0.308	0.582	0.07	6.376	0	0.292	0.18	0.404	0.057	5.097	0	1.1308	1.024	1.238	0.054	20.75	0	-0.1523
Osteoarthrosis, localized, secondary	musculoskeletal	0.0184	-0.507	0.544	0.268	0.069	1.01857	0.6023	1.72288	24	6507	42	8311	0.945214	0.976992	not_significant	0.00799102	0.02447	1.4331	1.235	1.632	0.101	14.145	0	-0.0498	-0.055	-0.045	0.002	-20.544	0	0.4428	0.306	0.58	0.07	6.347	0	0.2902	0.178	0.402	0.057	5.068	0	1.1259	1.019	1.233	0.054	20.697	0	-0.1534
Osteochondropathies	musculoskeletal	0.8012	-1.627	3.229	1.239	0.647	2.22821	0.196518	25.2544	10	6521	10	8343	0.517768	0.703483	not_significant	0.347957	0.285865	1.4334	1.235	1.632	0.101	14.149	0	-0.0498	-0.055	-0.045	0.002	-20.556	0	0.4421	0.305	0.579	0.07	6.337	0	0.2899	0.178	0.402	0.057	5.062	0	1.1256	1.019	1.232	0.054	20.695	0	-0.1534
Osteopenia or other disorder of bone and cartilage	musculoskeletal	0.8483	0.466	1.23	0.195	4.351	2.33567	1.59361	3.42123	76	6455	51	8302	1.35463e-05	0.000340303	mi_significant	0.368412	4.86818	1.4454	1.247	1.644	0.101	14.263	0	-0.0503	-0.055	-0.046	0.002	-20.73	0	0.4423	0.306	0.579	0.07	6.337	0	0.2873	0.175	0.4	0.057	5.012	0	1.1269	1.02	1.234	0.054	20.702	0	-0.1514
Osteoporosis NOS	musculoskeletal	2.7159	1.633	3.798	0.552	4.917	15.1182	5.11921	44.6119	27	6504	10	8343	8.76588e-07	3.99603e-05	mi_significant	1.1795	6.0572	1.4627	1.263	1.662	0.102	14.382	0	-0.0507	-0.055	-0.046	0.002	-20.804	0	0.4389	0.302	0.576	0.07	6.283	0	0.2905	0.178	0.403	0.057	5.066	0	1.1271	1.02	1.234	0.054	20.7	0	-0.1536
Otalgia	sense organs	0.0464	-0.234	0.326	0.143	0.325	1.04749	0.791362	1.38542	88	6443	138	8215	0.745094	0.851352	not_significant	0.0201513	0.127789	1.4329	1.234	1.631	0.101	14.145	0	-0.0498	-0.055	-0.045	0.002	-20.555	0	0.443	0.306	0.58	0.07	6.35	0	0.2902	0.178	0.402	0.057	5.067	0	1.1262	1.02	1.233	0.054	20.701	0	-0.1537
Other abnormal blood chemistry	symptoms	0.4249	0.271	0.579	0.079	5.411	1.52944	1.31128	1.78425	372	6159	376	7977	6.26849e-08	5.52463e-06	mi_significant	0.184532	7.20284	1.4308	1.232	1.63	0.101	14.114	0	-0.0504	-0.055	-0.046	0.002	-20.756	0	0.455	0.318	0.592	0.07	6.512	0	0.2904	0.178	0.403	0.057	5.065	0	1.137	1.03	1.244	0.054	20.865	0	-0.1516
Other abnormal glucose	endocrine/metabolic	0.2924	0.141	0.444	0.077	3.791	1.33964	1.15142	1.55893	346	6185	447	7906	0.000149922	0.0021687	mi_significant	0.126988	3.82413	1.4358	1.237	1.635	0.101	14.163	0	-0.0504	-0.055	-0.046	0.002	-20.72	0	0.4531	0.316	0.59	0.07	6.487	0	0.2988	0.186	0.411	0.057	5.211	0	1.1369	1.03	1.244	0.055	20.859	0	-0.1583
Other abnormality of urination	genitourinary	0.4271	0.103	0.751	0.165	2.584	1.53281	1.10849	2.11912	80	6451	86	8267	0.00975966	0.0470886	mi_significant	0.185487	2.01057	1.4454	1.247	1.644	0.101	14.247	0	-0.0502	-0.055	-0.045	0.002	-20.664	0	0.4422	0.305	0.579	0.07	6.338	0	0.2882	0.176	0.401	0.057	5.031	0	1.1244	1.018	1.231	0.054	20.668	0	-0.1559
Other acquired deformities of limbs	musculoskeletal	-0.0086	-0.81	0.793	0.409	-0.021	0.991437	0.444858	2.21002	11	6520	17	8336	0.983167	0.990976	not_significant	-0.00373493	0.00737273	1.433	1.234	1.632	0.101	14.146	0	-0.0498	-0.055	-0.045	0.002	-20.551	0	0.4427	0.306	0.579	0.07	6.346	0	0.2902	0.178	0.402	0.057	5.068	0	1.1258	1.019	1.232	0.054	20.698	0	-0.1534
Other acquired musculoskeletal deformity	musculoskeletal	0.1173	-0.351	0.585	0.239	0.491	1.12446	0.703984	1.79499	34	6497	44	8309	0.623286	0.775089	not_significant	0.0509427	0.205312	1.4334	1.235	1.632	0.101	14.149	0	-0.0499	-0.055	-0.045	0.002	-20.558	0	0.4424	0.306	0.579	0.07	6.341	0	0.2898	0.178	0.402	0.057	5.06	0	1.126	1.019	1.233	0.054	20.702	0	-0.1533
Other acute and subacute forms of ischemic heart disease	circulatory system	1.8437	0.59	3.097	0.639	2.883	6.31988	1.80399	22.1315	10	6521	10	8343	0.00393476	0.0239712	mi_significant	0.800709	2.40508	1.4434	1.245	1.642	0.101	14.234	0	-0.0501	-0.055	-0.045	0.002	-20.644	0	0.4414	0.305	0.578	0.07	6.325	0	0.2886	0.176	0.401	0.057	5.038	0	1.1263	1.02	1.233	0.054	20.704	0	-0.1542
Other allied disorders of spine	musculoskeletal	0.0325	-0.476	0.541	0.26	0.125	1.03303	0.621263	1.71772	26	6505	41	8312	0.900353	0.948419	not_significant	0.0141146	0.0455874	1.4333	1.235	1.632	0.101	14.144	0	-0.0498	-0.055	-0.045	0.002	-20.544	0	0.4425	0.306	0.579	0.07	6.34	0	0.2899	0.178	0.402	0.057	5.058	0	1.1259	1.019	1.232	0.054	20.7	0	-0.1534
Other alveolar and parietoalveolar pneumonopathy	respiratory	1.2384	-0.508	2.984	0.891	1.39	3.45009	0.601698	19.7667	10	6521	10	8343	0.164508	0.338754	not_significant	0.53783	0.783812	1.4354	1.237	1.634	0.101	14.167	0	-0.0499	-0.055	-0.045	0.002	-20.578	0	0.4423	0.306	0.579	0.07	6.34	0	0.2907	0.178	0.403	0.057	5.076	0	1.1253	1.019	1.232	0.054	20.686	0	-0.1531
Other and unspecified coagulation defects	hematopoietic	1.2818	0.497	2.066	0.4	3.203	3.60312	1.64378	7.89319	25	6506	10	8343	0.0013602	0.0112387	mi_significant	0.556679	2.8664	1.4383	1.24	1.637	0.101	14.19	0	-0.05	-0.055	-0.045	0.002	-20.604	0	0.4423	0.306	0.579	0.07	6.339	0	0.2861	0.174	0.398	0.057	4.993	0	1.124	1.017	1.231	0.054	20.659	0	-0.1546
Other and unspecified congenital anomalies	congenital anomalies	0.3228	-0.74	1.386	0.542	0.595	1.38099	0.477114	3.99882	10	6521	10	8343	0.551701	0.722589	not_significant	0.14019	0.258296	1.4323	1.234	1.631	0.101	14.138	0	-0.0498	-0.055	-0.045	0.002	-20.55	0	0.443	0.306	0.58	0.07	6.351	0	0.2904	0.178	0.403	0.057	5.072	0	1.1258	1.019	1.232	0.054	20.699	0	-0.1531
Other and unspecified disc disorder	musculoskeletal	0.0489	-0.482	0.58	0.271	0.181	1.05012	0.617547	1.78604	22	6509	41	8312	0.85669	0.921444	not_significant	0.021237	0.0671761	1.433	1.234	1.632	0.101	14.146	0	-0.0498	-0.055	-0.045	0.002	-20.552	0	0.4429	0.306	0.58	0.07	6.348	0	0.2903	0.178	0.403	0.057	5.069	0	1.1261	1.019	1.233	0.054	20.696	0	-0.1534
Other and unspecified disorders of the nervous system	neurological	1.8211	0.476	3.167	0.686	2.653	6.17865	1.60962	23.7362	12	6519	10	8343	0.00797717	0.0407174	mi_significant	0.790894	2.09815	1.4349	1.236	1.634	0.101	14.155	0	-0.0499	-0.055	-0.045	0.002	-20.571	0	0.4417	0.305	0.578	0.07	6.329	0	0.291	0.179	0.403	0.057	5.081	0	1.126	1.019	1.233	0.054	20.695	0	-0.1539
Other anemias	hematopoietic	0.7905	0.521	1.06	0.137	5.753	2.2045	1.68371	2.88637	141	6390	105	8248	8.768e-09	9.88995e-07	mi_significant	0.34331	8.0571	1.4499	1.251	1.649	0.101	14.293	0	-0.0507	-0.055	-0.046	0.002	-20.842	0	0.4491	0.312	0.586	0.07	6.428	0	0.2936	0.181	0.406	0.057	5.121	0	1.1325	1.026	1.239	0.054	20.789	0	-0.1487
Other aneurysm	circulatory system	0.0391	-1.892	1.97	0.985	0.04	1.03987	0.15077	7.17068	10	6521	10	8343	0.968306	0.986971	not_significant	0.0169809	0.0139873	1.433	1.234	1.632	0.101	14.146	0	-0.0498	-0.055	-0.045	0.002	-20.553	0	0.4427	0.306	0.579	0.07	6.346	0	0.2902	0.178	0.402	0.057	5.068	0	1.1258	1.019	1.232	0.054	20.699	0	-0.1534
Other arthropathies	musculoskeletal	-0.3107	-1.611	0.99	0.664	-0.468	0.732934	0.199688	2.69123	10	6521	10	8343	0.639632	0.782551	not_significant	-0.134935	0.19407	1.4332	1.235	1.632	0.101	14.148	0	-0.0498	-0.055	-0.045	0.002	-20.552	0	0.4424	0.306	0.579	0.07	6.341	0	0.29	0.178	0.402	0.057	5.064	0	1.1258	1.019	1.232	0.054	20.698	0	-0.1535
Other benign neoplasm of connective and other soft tissue	neoplasms	-0.1981	-0.99	0.594	0.404	-0.49	0.820288	0.371577	1.81122	11	6520	18	8335	0.623823	0.775089	not_significant	-0.0860337	0.204938	1.4326	1.234	1.631	0.101	14.14	0	-0.0498	-0.055	-0.045	0.002	-20.542	0	0.4424	0.306	0.579	0.07	6.342	0	0.2906	0.178	0.403	0.057	5.074	0	1.126	1.019	1.233	0.054	20.702	0	-0.1534
Other cardiac conduction disorders	circulatory system	0.9216	-0.386	2.229	0.667	1.382	2.51331	0.679771	9.29057	10	6521	10	8343	0.167066	0.341891	not_significant	0.400246	0.777112	1.4358	1.237	1.634	0.101	14.168	0	-0.0499	-0.055	-0.045	0.002	-20.576	0	0.4432	0.306	0.58	0.07	6.352	0	0.2889	0.177	0.401	0.057	5.044	0	1.1255	1.019	1.232	0.054	20.692	0	-0.1531
Other cardiomyopathy	circulatory system	0.6225	-2.653	3.898	1.671	0.372	1.86358	0.0704396	49.3037	10	6521	10	8343	0.709569	0.833082	not_significant	0.270348	0.149005	1.4334	1.235	1.632	0.101	14.149	0	-0.0498	-0.055	-0.045	0.002	-20.556	0	0.4427	0.306	0.579	0.07	6.346	0	0.2902	0.178	0.402	0.057	5.068	0	1.1257	1.019	1.232	0.054	20.696	0	-0.1534
Other cerebral degenerations	neurological	0.344	-2.093	2.781	1.243	0.277	1.41058	0.123317	16.1351	10	6521	10	8343	0.782021	0.874702	not_significant	0.149397	0.106782	1.4327	1.234	1.631	0.101	14.143	0	-0.0498	-0.055	-0.045	0.002	-20.549	0	0.4422	0.305	0.579	0.07	6.336	0	0.2902	0.178	0.402	0.057	5.068	0	1.1257	1.019	1.232	0.054	20.697	0	-0.1534
Other chronic ischemic heart disease, unspecified	circulatory system	2.8538	1.282	4.426	0.802	3.558	17.3536	3.60384	83.5964	11	6520	10	8343	0.000373666	0.00415115	mi_significant	1.23939	3.42752	1.4521	1.253	1.651	0.102	14.306	0	-0.0504	-0.055	-0.046	0.002	-20.715	0	0.4412	0.304	0.578	0.07	6.319	0	0.2895	0.177	0.402	0.057	5.053	0	1.1268	1.02	1.233	0.054	20.706	0	-0.1549
Other chronic nonalcoholic liver disease	digestive	0.4684	0.247	0.69	0.113	4.147	1.59744	1.28018	1.99372	174	6357	170	8183	3.37208e-05	0.000679466	mi_significant	0.203424	4.4721	1.4275	1.229	1.626	0.101	14.08	0	-0.05	-0.055	-0.045	0.002	-20.611	0	0.4446	0.308	0.581	0.07	6.37	0	0.2905	0.178	0.403	0.057	5.069	0	1.1348	1.028	1.242	0.054	20.832	0	-0.1528
Other CNS infection and poliomyelitis	neurological	0.3732	-0.712	1.458	0.554	0.674	1.45237	0.490662	4.29736	10	6521	10	8343	0.500325	0.694145	not_significant	0.162079	0.300748	1.4324	1.234	1.631	0.101	14.138	0	-0.0498	-0.055	-0.045	0.002	-20.549	0	0.4432	0.306	0.58	0.07	6.352	0	0.2904	0.178	0.403	0.057	5.07	0	1.1259	1.019	1.233	0.054	20.7	0	-0.1534
Other conditions of brain	neurological	1.8848	-0.285	4.054	1.107	1.703	6.58504	0.752014	57.6275	10	6521	10	8343	0.0885948	0.221768	not_significant	0.818558	1.05259	1.4304	1.232	1.629	0.101	14.116	0	-0.0498	-0.055	-0.045	0.002	-20.543	0	0.4446	0.308	0.581	0.07	6.372	0	0.2915	0.179	0.404	0.057	5.089	0	1.1273	1.021	1.234	0.054	20.719	0	-0.1519
Other conditions of brain, NOS	neurological	0.6906	0.041	1.34	0.331	2.084	1.99491	1.04185	3.81904	24	6507	18	8335	0.0371636	0.120711	not_significant	0.299924	1.42988	1.4337	1.235	1.632	0.101	14.154	0	-0.0499	-0.055	-0.045	0.002	-20.587	0	0.4411	0.304	0.578	0.07	6.322	0	0.2909	0.179	0.403	0.057	5.078	0	1.1274	1.021	1.234	0.054	20.721	0	-0.1517
Other congenital anomalies of lower limb, including pelvic girdle	congenital anomalies	0.0024	-1.029	1.034	0.526	0.005	1.0024	0.357364	2.81229	10	6521	10	8343	0.996369	0.997123	not_significant	0.00104231	0.00157988	1.433	1.234	1.632	0.101	14.145	0	-0.0498	-0.055	-0.045	0.002	-20.553	0	0.4427	0.306	0.579	0.07	6.346	0	0.2902	0.178	0.402	0.057	5.068	0	1.1258	1.019	1.232	0.054	20.699	0	-0.1534
Other congenital musculoskeletal anomalies	congenital anomalies	0.3513	-1.337	2.039	0.861	0.408	1.42091	0.262632	7.68292	10	6521	10	8343	0.68339	0.808087	not_significant	0.152568	0.165332	1.4329	1.234	1.631	0.101	14.145	0	-0.0498	-0.055	-0.045	0.002	-20.551	0	0.4425	0.306	0.579	0.07	6.342	0	0.2898	0.178	0.402	0.057	5.06	0	1.1258	1.019	1.232	0.054	20.699	0	-0.1535
Other demyelinating diseases of central nervous system	neurological	0.6227	-1.024	2.269	0.84	0.741	1.86395	0.359155	9.66973	10	6521	10	8343	0.4585	0.659441	not_significant	0.270435	0.33866	1.4328	1.234	1.631	0.101	14.143	0	-0.0498	-0.055	-0.045	0.002	-20.554	0	0.4427	0.306	0.579	0.07	6.346	0	0.2907	0.178	0.403	0.057	5.076	0	1.1263	1.02	1.233	0.054	20.706	0	-0.1533
Other derangement of joint	musculoskeletal	0.2352	-0.031	0.502	0.136	1.729	1.26516	0.969476	1.65202	111	6420	132	8221	0.0838628	0.212796	not_significant	0.102146	1.07643	1.4332	1.235	1.632	0.101	14.149	0	-0.05	-0.055	-0.045	0.002	-20.595	0	0.4454	0.309	0.582	0.07	6.383	0	0.2903	0.178	0.403	0.057	5.068	0	1.1273	1.021	1.234	0.054	20.721	0	-0.1531
Other diseases of blood and blood-forming organs	hematopoietic	0.0558	-0.513	0.625	0.29	0.192	1.05739	0.598697	1.86825	21	6510	35	8318	0.847597	0.918462	not_significant	0.0242336	0.0718106	1.4332	1.235	1.632	0.101	14.147	0	-0.0498	-0.055	-0.045	0.002	-20.552	0	0.4428	0.306	0.58	0.07	6.348	0	0.2903	0.178	0.402	0.057	5.068	0	1.1259	1.019	1.232	0.054	20.7	0	-0.1536
Other diseases of lung	respiratory	0.7044	0.337	1.072	0.188	3.756	2.02263	1.40074	2.92122	65	6466	64	8289	0.000172546	0.00235161	mi_significant	0.305917	3.76309	1.4447	1.246	1.643	0.101	14.251	0	-0.0503	-0.055	-0.046	0.002	-20.711	0	0.4431	0.306	0.58	0.07	6.349	0	0.2912	0.179	0.403	0.057	5.081	0	1.1305	1.024	1.237	0.054	20.768	0	-0.1557
Other diseases of respiratory system, NEC	respiratory	-0.0702	-0.474	0.334	0.206	-0.341	0.932207	0.622507	1.39654	43	6488	64	8289	0.733317	0.848823	not_significant	-0.0304875	0.134708	1.4334	1.235	1.632	0.101	14.149	0	-0.0498	-0.055	-0.045	0.002	-20.553	0	0.4428	0.306	0.58	0.07	6.348	0	0.2907	0.178	0.403	0.057	5.075	0	1.1258	1.019	1.232	0.054	20.699	0	-0.1531
Other diseases of respiratory system, not elsewhere classified	respiratory	0.7163	-0.801	2.234	0.774	0.925	2.04685	0.44888	9.33714	10	6521	10	8343	0.354921	0.559243	not_significant	0.311085	0.449869	1.4324	1.234	1.631	0.101	14.139	0	-0.0498	-0.055	-0.045	0.002	-20.552	0	0.4427	0.306	0.579	0.07	6.346	0	0.2902	0.178	0.402	0.057	5.067	0	1.1264	1.02	1.233	0.054	20.708	0	-0.1531
Other diseases of the teeth and supporting structures	digestive	0.3739	-0.387	1.135	0.388	0.963	1.45339	0.679091	3.11117	14	6517	15	8338	0.335786	0.541353	not_significant	0.162383	0.473937	1.4332	1.235	1.632	0.101	14.148	0	-0.0499	-0.055	-0.045	0.002	-20.567	0	0.4433	0.307	0.58	0.07	6.354	0	0.2907	0.178	0.403	0.057	5.076	0	1.127	1.02	1.234	0.054	20.714	0	-0.152
Other disorders of arteries and arterioles	circulatory system	1.3153	0.417	2.214	0.458	2.869	3.72587	1.5174	9.15225	19	6512	10	8343	0.00411148	0.0245944	mi_significant	0.571228	2.386	1.4386	1.24	1.637	0.101	14.196	0	-0.0501	-0.055	-0.045	0.002	-20.63	0	0.4413	0.305	0.578	0.07	6.324	0	0.2916	0.179	0.404	0.057	5.089	0	1.1266	1.02	1.233	0.054	20.703	0	-0.151
Other disorders of biliary tract	digestive	1.2669	0.24	2.294	0.524	2.418	3.54983	1.27125	9.91452	11	6520	10	8343	0.0156019	0.065693	not_significant	0.550208	1.80682	1.4316	1.233	1.63	0.101	14.127	0	-0.0499	-0.055	-0.045	0.002	-20.576	0	0.4451	0.308	0.582	0.07	6.378	0	0.294	0.182	0.406	0.057	5.13	0	1.1302	1.023	1.237	0.054	20.762	0	-0.1504
Other disorders of bladder	genitourinary	0.7012	0.042	1.36	0.336	2.086	2.01617	1.04289	3.89619	20	6511	20	8333	0.0369496	0.120314	not_significant	0.304527	1.43239	1.4394	1.241	1.638	0.101	14.2	0	-0.0501	-0.055	-0.045	0.002	-20.625	0	0.4427	0.306	0.579	0.07	6.346	0	0.2924	0.18	0.405	0.057	5.104	0	1.1282	1.022	1.235	0.054	20.733	0	-0.1514
Other disorders of bone and cartilage	musculoskeletal	0.628	0.353	0.903	0.14	4.471	1.87386	1.42333	2.46699	117	6414	112	8241	7.78497e-06	0.000228705	mi_significant	0.272737	5.10874	1.4427	1.244	1.641	0.101	14.241	0	-0.0504	-0.055	-0.046	0.002	-20.757	0	0.4476	0.311	0.584	0.07	6.414	0	0.2918	0.179	0.404	0.057	5.091	0	1.1349	1.028	1.242	0.054	20.831	0	-0.152
Other disorders of carbohydrate transport and metabolism	endocrine/metabolic	1.8323	-0.365	4.03	1.121	1.634	6.24824	0.694197	56.2609	10	6521	10	8343	0.102205	0.239142	not_significant	0.795758	0.990528	1.4327	1.234	1.631	0.101	14.141	0	-0.0499	-0.055	-0.045	0.002	-20.56	0	0.4441	0.307	0.581	0.07	6.365	0	0.2896	0.177	0.402	0.057	5.055	0	1.1272	1.021	1.234	0.054	20.72	0	-0.152
Other disorders of cervical region	musculoskeletal	0.3272	-0.505	1.16	0.425	0.771	1.38708	0.603506	3.18993	11	6520	14	8339	0.440945	0.64412	not_significant	0.142101	0.355616	1.4345	1.236	1.633	0.101	14.159	0	-0.0499	-0.055	-0.045	0.002	-20.567	0	0.4426	0.306	0.579	0.07	6.345	0	0.289	0.177	0.401	0.057	5.045	0	1.1261	1.019	1.233	0.054	20.703	0	-0.1532
Other disorders of circulatory system	circulatory system	0.4421	-0.697	1.581	0.581	0.761	1.55597	0.498077	4.85981	10	6521	10	8343	0.44687	0.649783	not_significant	0.192002	0.349819	1.4346	1.236	1.633	0.101	14.158	0	-0.0499	-0.055	-0.045	0.002	-20.566	0	0.4424	0.306	0.579	0.07	6.341	0	0.2903	0.178	0.403	0.057	5.069	0	1.1256	1.019	1.232	0.054	20.694	0	-0.1533
Other disorders of ear	sense organs	0.0387	-0.292	0.37	0.169	0.229	1.03946	0.746769	1.44773	62	6469	99	8254	0.818733	0.898975	not_significant	0.0168072	0.0868576	1.4332	1.235	1.632	0.101	14.147	0	-0.0498	-0.055	-0.045	0.002	-20.551	0	0.4429	0.306	0.58	0.07	6.348	0	0.2902	0.178	0.402	0.057	5.067	0	1.1259	1.019	1.233	0.054	20.7	0	-0.1537
Other disorders of eye	sense organs	0.3698	-0.185	0.924	0.283	1.307	1.44745	0.831104	2.51935	25	6506	29	8324	0.191362	0.374787	not_significant	0.160602	0.718143	1.4342	1.236	1.633	0.101	14.155	0	-0.0499	-0.055	-0.045	0.002	-20.572	0	0.4437	0.307	0.58	0.07	6.36	0	0.2899	0.178	0.402	0.057	5.061	0	1.1266	1.02	1.233	0.054	20.711	0	-0.1537
Other disorders of eyelids	sense organs	0.0476	-0.367	0.462	0.211	0.225	1.04875	0.69281	1.58725	39	6492	63	8290	0.821916	0.900973	not_significant	0.0206724	0.0851724	1.4333	1.235	1.632	0.101	14.147	0	-0.0499	-0.055	-0.045	0.002	-20.548	0	0.4427	0.306	0.579	0.07	6.345	0	0.2903	0.178	0.403	0.057	5.069	0	1.1261	1.019	1.233	0.054	20.699	0	-0.1533
Other disorders of gallbladder	digestive	0.5469	-0.199	1.293	0.38	1.438	1.72789	0.81955	3.6437	14	6517	17	8336	0.150551	0.319782	not_significant	0.237516	0.822316	1.4351	1.237	1.634	0.101	14.165	0	-0.0499	-0.055	-0.045	0.002	-20.586	0	0.4431	0.306	0.58	0.07	6.351	0	0.291	0.179	0.403	0.057	5.081	0	1.1276	1.021	1.234	0.054	20.724	0	-0.1527
Other disorders of intestine	digestive	0.043	-0.38	0.466	0.216	0.199	1.04394	0.683861	1.59361	38	6493	59	8294	0.842067	0.915618	not_significant	0.0186747	0.0746531	1.4329	1.234	1.631	0.101	14.145	0	-0.0498	-0.055	-0.045	0.002	-20.552	0	0.443	0.306	0.58	0.07	6.349	0	0.2904	0.178	0.403	0.057	5.07	0	1.1262	1.02	1.233	0.054	20.696	0	-0.1532
Other disorders of lipoid metabolism	endocrine/metabolic	-0.0862	-0.785	0.613	0.357	-0.242	0.917411	0.45612	1.84596	14	6517	23	8330	0.809015	0.892008	not_significant	-0.0374362	0.0920437	1.433	1.234	1.632	0.101	14.146	0	-0.0498	-0.055	-0.045	0.002	-20.552	0	0.4426	0.306	0.579	0.07	6.345	0	0.2904	0.178	0.403	0.057	5.071	0	1.1259	1.019	1.232	0.054	20.7	0	-0.1532
Other disorders of liver	digestive	0.8919	0.526	1.258	0.187	4.777	2.43976	1.69215	3.51838	79	6452	51	8302	1.77818e-06	7.34609e-05	mi_significant	0.387347	5.75003	1.4366	1.238	1.635	0.101	14.167	0	-0.0502	-0.055	-0.045	0.002	-20.66	0	0.4369	0.3	0.574	0.07	6.256	0	0.2904	0.178	0.403	0.057	5.067	0	1.133	1.026	1.24	0.054	20.804	0	-0.1501
Other disorders of male genital organs	genitourinary	-0.2644	-0.439	-0.09	0.089	-2.963	0.767666	0.644681	0.913931	221	6310	394	7959	0.00304443	0.020327	con_significant	-0.114827	2.51649	1.4505	1.251	1.649	0.102	14.288	0	-0.05	-0.055	-0.045	0.002	-20.593	0	0.4376	0.301	0.574	0.07	6.269	0	0.2861	0.174	0.398	0.057	4.993	0	1.1208	1.014	1.228	0.054	20.594	0	-0.1522
Other disorders of metabolism	endocrine/metabolic	1.0947	0.798	1.392	0.152	7.223	2.98829	2.22109	4.02289	125	6406	78	8275	5.08793e-13	1.68156e-10	mi_significant	0.475422	12.2935	1.4503	1.251	1.649	0.101	14.289	0	-0.0504	-0.055	-0.046	0.002	-20.735	0	0.4417	0.305	0.579	0.07	6.326	0	0.2779	0.165	0.39	0.057	4.845	0	1.1266	1.02	1.233	0.054	20.692	0	-0.1773
Other disorders of middle ear and mastoid	sense organs	-0.0112	-1.603	1.581	0.812	-0.014	0.988862	0.201292	4.85981	10	6521	10	8343	0.988971	0.992725	not_significant	-0.0048641	0.00481652	1.433	1.234	1.632	0.101	14.146	0	-0.0498	-0.055	-0.045	0.002	-20.552	0	0.4427	0.306	0.579	0.07	6.346	0	0.2902	0.178	0.402	0.057	5.068	0	1.1258	1.019	1.232	0.054	20.698	0	-0.1534
Other disorders of neurohypophysis	endocrine/metabolic	1.5943	0.335	2.854	0.643	2.481	4.92488	1.39794	17.3571	10	6521	10	8343	0.0130962	0.0580978	not_significant	0.692396	1.88286	1.439	1.24	1.638	0.101	14.198	0	-0.05	-0.055	-0.045	0.002	-20.603	0	0.4384	0.302	0.575	0.07	6.283	0	0.2898	0.178	0.402	0.057	5.059	0	1.1255	1.019	1.232	0.054	20.69	0	-0.1551
Other disorders of peritoneum	digestive	0.6224	-0.601	1.845	0.624	0.998	1.86339	0.548263	6.3281	10	6521	10	8343	0.318521	0.52439	not_significant	0.270305	0.496862	1.4322	1.234	1.631	0.101	14.138	0	-0.0498	-0.055	-0.045	0.002	-20.555	0	0.4437	0.307	0.58	0.07	6.36	0	0.2905	0.178	0.403	0.057	5.073	0	1.1266	1.02	1.233	0.054	20.711	0	-0.1528
Other disorders of prostate	genitourinary	0.518	-0.187	1.223	0.359	1.441	1.67867	0.829444	3.39736	15	6516	19	8334	0.149587	0.318958	not_significant	0.224965	0.825106	1.4387	1.24	1.637	0.101	14.189	0	-0.05	-0.055	-0.045	0.002	-20.594	0	0.4422	0.306	0.579	0.07	6.339	0	0.2896	0.177	0.402	0.057	5.056	0	1.1269	1.02	1.233	0.054	20.714	0	-0.1529
Other disorders of soft tissues	musculoskeletal	0.063	-0.166	0.292	0.117	0.539	1.06503	0.847046	1.3391	136	6395	204	8149	0.58965	0.750049	not_significant	0.0273606	0.229406	1.4334	1.235	1.632	0.101	14.15	0	-0.0499	-0.055	-0.045	0.002	-20.559	0	0.4432	0.306	0.58	0.07	6.353	0	0.2902	0.178	0.402	0.057	5.067	0	1.1264	1.02	1.233	0.054	20.705	0	-0.1539
Other disorders of stomach and duodenum	digestive	0.7508	0.339	1.163	0.21	3.57	2.11869	1.40354	3.19952	54	6477	46	8307	0.000357209	0.00403616	mi_significant	0.326068	3.44708	1.4432	1.244	1.642	0.101	14.234	0	-0.0503	-0.055	-0.046	0.002	-20.691	0	0.4425	0.306	0.579	0.07	6.339	0	0.292	0.18	0.404	0.057	5.096	0	1.1306	1.024	1.237	0.054	20.769	0	-0.1509
Other disorders of synovium, tendon, and bursa	musculoskeletal	0.2661	-0.026	0.558	0.149	1.784	1.30487	0.974335	1.74717	86	6445	116	8237	0.0743554	0.192364	not_significant	0.115566	1.12869	1.437	1.238	1.636	0.101	14.179	0	-0.0501	-0.055	-0.045	0.002	-20.611	0	0.4459	0.309	0.583	0.07	6.389	0	0.2911	0.179	0.403	0.057	5.082	0	1.129	1.022	1.236	0.054	20.741	0	-0.1527
Other disorders of testis	genitourinary	2.2922	1.055	3.529	0.631	3.632	9.89669	2.87198	34.0899	18	6513	10	8343	0.000281169	0.00341014	mi_significant	0.99549	3.55103	1.4268	1.228	1.625	0.101	14.074	0	-0.0498	-0.055	-0.045	0.002	-20.521	0	0.4471	0.31	0.584	0.07	6.407	0	0.2918	0.179	0.404	0.057	5.092	0	1.13	1.023	1.237	0.054	20.762	0	-0.1537
Other disorders of the kidney and ureters	genitourinary	1.1976	0.799	1.597	0.204	5.884	3.31216	2.22332	4.9382	71	6460	44	8309	4.00675e-09	6.11564e-07	mi_significant	0.520111	8.39721	1.4611	1.262	1.66	0.102	14.392	0	-0.0509	-0.056	-0.046	0.002	-20.92	0	0.4487	0.312	0.586	0.07	6.425	0	0.2932	0.181	0.406	0.057	5.113	0	1.1376	1.031	1.244	0.055	20.873	0	-0.1456
Other disorders of thyroid	endocrine/metabolic	1.3102	0.574	2.046	0.375	3.49	3.70692	1.77535	7.73689	25	6506	11	8342	0.000482443	0.00510232	mi_significant	0.569013	3.31655	1.4353	1.237	1.634	0.101	14.162	0	-0.05	-0.055	-0.045	0.002	-20.591	0	0.4406	0.304	0.577	0.07	6.313	0	0.2903	0.178	0.403	0.057	5.067	0	1.1269	1.02	1.234	0.054	20.71	0	-0.155
Other disorders of tympanic membrane	sense organs	-0.9568	-2.536	0.622	0.806	-1.188	0.38412	0.0791825	1.86265	10	6521	10	8343	0.235029	0.421014	not_significant	-0.415533	0.628878	1.4325	1.234	1.631	0.101	14.142	0	-0.0498	-0.055	-0.045	0.002	-20.539	0	0.4419	0.305	0.579	0.07	6.334	0	0.29	0.178	0.402	0.057	5.064	0	1.1253	1.019	1.232	0.054	20.687	0	-0.1535
Other disorders of urethra and urinary tract	genitourinary	0.2508	-1.227	1.729	0.754	0.333	1.28505	0.293171	5.63502	10	6521	10	8343	0.739389	0.850715	not_significant	0.108921	0.131127	1.4333	1.235	1.632	0.101	14.148	0	-0.0498	-0.055	-0.045	0.002	-20.555	0	0.4428	0.306	0.58	0.07	6.348	0	0.29	0.178	0.402	0.057	5.064	0	1.1257	1.019	1.232	0.054	20.697	0	-0.1533
Other dyschromia	dermatologic	0.0586	-0.114	0.231	0.088	0.665	1.06035	0.892258	1.25986	250	6281	367	7986	0.50604	0.696584	not_significant	0.0254497	0.295815	1.4361	1.237	1.635	0.101	14.161	0	-0.0499	-0.055	-0.045	0.002	-20.547	0	0.4432	0.307	0.58	0.07	6.353	0	0.2885	0.176	0.401	0.057	5.033	0	1.1251	1.018	1.232	0.054	20.68	0	-0.1552
Other dyspnea	respiratory	0.2701	0.104	0.436	0.085	3.192	1.3101	1.1096	1.54651	290	6241	349	8004	0.00141255	0.0115271	mi_significant	0.117303	2.85	1.4338	1.235	1.633	0.101	14.146	0	-0.0502	-0.055	-0.045	0.002	-20.661	0	0.4464	0.31	0.583	0.07	6.396	0	0.2909	0.179	0.403	0.057	5.078	0	1.1324	1.026	1.239	0.054	20.796	0	-0.1539
Other endocrine disorders	endocrine/metabolic	1.1415	0.647	1.636	0.252	4.522	3.13146	1.9098	5.13459	56	6475	25	8328	6.12418e-06	0.000188283	mi_significant	0.495747	5.21295	1.4376	1.239	1.636	0.101	14.174	0	-0.0501	-0.055	-0.045	0.002	-20.615	0	0.4425	0.306	0.579	0.07	6.337	0	0.2888	0.176	0.401	0.057	5.039	0	1.1239	1.017	1.231	0.054	20.65	0	-0.1551
Other forms of chronic heart disease	circulatory system	2.8201	1.596	4.044	0.625	4.515	16.7785	4.93326	57.0541	25	6506	10	8343	6.31887e-06	0.000189853	mi_significant	1.22475	5.19936	1.446	1.247	1.645	0.102	14.237	0	-0.0504	-0.055	-0.046	0.002	-20.709	0	0.4498	0.313	0.587	0.07	6.439	0	0.2897	0.177	0.402	0.057	5.051	0	1.1324	1.026	1.239	0.054	20.786	0	-0.1477
Other headache syndromes	neurological	0.5187	0.29	0.748	0.117	4.439	1.67984	1.33643	2.11277	170	6361	155	8198	9.04583e-06	0.000250113	mi_significant	0.225269	5.04355	1.4238	1.225	1.623	0.101	14.045	0	-0.05	-0.055	-0.045	0.002	-20.603	0	0.4484	0.312	0.585	0.07	6.422	0	0.2947	0.182	0.407	0.057	5.141	0	1.1348	1.028	1.242	0.054	20.831	0	-0.1518
Other heart block	circulatory system	1.068	-1.339	3.475	1.228	0.87	2.90955	0.262108	32.2978	10	6521	10	8343	0.384539	0.591117	not_significant	0.463827	0.41506	1.4337	1.235	1.632	0.101	14.151	0	-0.0499	-0.055	-0.045	0.002	-20.561	0	0.4432	0.306	0.58	0.07	6.352	0	0.2902	0.178	0.402	0.057	5.067	0	1.126	1.019	1.233	0.054	20.701	0	-0.1529
Other hemoglobinopathies	hematopoietic	0.7242	0.043	1.406	0.348	2.083	2.06308	1.04394	4.0796	20	6511	16	8337	0.0372542	0.120711	not_significant	0.314516	1.42882	1.4327	1.234	1.631	0.101	14.14	0	-0.0499	-0.055	-0.045	0.002	-20.558	0	0.4422	0.305	0.579	0.07	6.338	0	0.2894	0.177	0.402	0.057	5.053	0	1.1269	1.02	1.234	0.054	20.716	0	-0.1546
Other hypertensive complications	circulatory system	1.2027	0.802	1.604	0.205	5.878	3.32909	2.23	4.97288	69	6462	43	8310	4.16345e-09	6.11564e-07	mi_significant	0.522326	8.38055	1.4617	1.263	1.661	0.102	14.388	0	-0.0507	-0.056	-0.046	0.002	-20.839	0	0.4407	0.304	0.578	0.07	6.309	0	0.2887	0.176	0.401	0.057	5.036	0	1.1291	1.022	1.236	0.054	20.738	0	-0.161
Other hypertrophic and atrophic conditions of skin	dermatologic	0.2407	0.007	0.475	0.119	2.016	1.27214	1.00702	1.60801	137	6394	181	8172	0.0438405	0.135731	not_significant	0.104535	1.35812	1.4355	1.237	1.634	0.101	14.167	0	-0.0501	-0.055	-0.045	0.002	-20.624	0	0.4456	0.309	0.582	0.07	6.385	0	0.2932	0.181	0.406	0.057	5.118	0	1.131	1.024	1.238	0.054	20.765	0	-0.1512
Other hypertrophic cardiomyopathy	circulatory system	1.4622	-1.187	4.111	1.352	1.082	4.31544	0.305135	61.0077	10	6521	10	8343	0.279337	0.477369	not_significant	0.635025	0.553871	1.4347	1.236	1.633	0.101	14.162	0	-0.0499	-0.055	-0.045	0.002	-20.57	0	0.4428	0.306	0.58	0.07	6.347	0	0.2898	0.178	0.402	0.057	5.06	0	1.1256	1.019	1.232	0.054	20.694	0	-0.1536
Other ill-defined and unknown causes of morbidity and mortality		0.611	0.147	1.075	0.237	2.578	1.84227	1.15835	2.92999	44	6487	39	8314	0.00992809	0.0475541	mi_significant	0.265354	2.00313	1.4402	1.242	1.639	0.101	14.212	0	-0.05	-0.055	-0.045	0.002	-20.628	0	0.4396	0.303	0.576	0.07	6.3	0	0.2848	0.172	0.397	0.057	4.968	0	1.1254	1.019	1.232	0.054	20.688	0	-0.1551
Other immunological findings	endocrine/metabolic	0.5276	0.109	0.946	0.213	2.473	1.69486	1.11516	2.57539	48	6483	47	8306	0.0134043	0.0590683	not_significant	0.229134	1.87276	1.432	1.233	1.631	0.101	14.135	0	-0.0499	-0.055	-0.045	0.002	-20.59	0	0.4432	0.306	0.58	0.07	6.352	0	0.2928	0.18	0.405	0.057	5.11	0	1.1297	1.023	1.236	0.054	20.757	0	-0.1524
Other infectious and parasitic diseases	infectious diseases	0.4086	0.091	0.726	0.162	2.52	1.50471	1.09527	2.0668	83	6448	88	8265	0.0117386	0.05369	not_significant	0.177453	1.93038	1.4372	1.239	1.636	0.101	14.182	0	-0.0501	-0.055	-0.045	0.002	-20.627	0	0.4449	0.308	0.582	0.07	6.377	0	0.2883	0.176	0.401	0.057	5.034	0	1.1279	1.021	1.235	0.054	20.731	0	-0.1531
Other inflammatory disorders of male genital organs	genitourinary	0.5849	-0.439	1.609	0.523	1.119	1.79481	0.644681	4.99781	10	6521	10	8343	0.26303	0.455735	not_significant	0.254019	0.579994	1.4327	1.234	1.631	0.101	14.143	0	-0.0498	-0.055	-0.045	0.002	-20.553	0	0.4428	0.306	0.58	0.07	6.348	0	0.2897	0.177	0.402	0.057	5.059	0	1.1258	1.019	1.232	0.054	20.699	0	-0.1537
Other inflammatory spondylopathies	musculoskeletal	0.4384	-0.637	1.514	0.549	0.799	1.55022	0.528877	4.54487	10	6521	10	8343	0.424411	0.631083	not_significant	0.190395	0.372213	1.4343	1.236	1.633	0.101	14.157	0	-0.0499	-0.055	-0.045	0.002	-20.564	0	0.4419	0.305	0.579	0.07	6.334	0	0.2898	0.178	0.402	0.057	5.059	0	1.1256	1.019	1.232	0.054	20.695	0	-0.154
Other intestinal obstruction	digestive	0.4701	-0.212	1.152	0.348	1.352	1.60015	0.808965	3.16452	22	6509	16	8337	0.176511	0.354093	not_significant	0.204162	0.753229	1.43	1.231	1.629	0.101	14.112	0	-0.0498	-0.055	-0.045	0.002	-20.534	0	0.4434	0.307	0.58	0.07	6.355	0	0.2907	0.178	0.403	0.057	5.077	0	1.1259	1.019	1.233	0.054	20.699	0	-0.1532
Other local infections of skin and subcutaneous tissue	dermatologic	0.6246	0.261	0.988	0.185	3.371	1.8675	1.29823	2.68586	68	6463	61	8292	0.000749843	0.00708066	mi_significant	0.27126	3.12503	1.4374	1.239	1.636	0.101	14.187	0	-0.0501	-0.055	-0.045	0.002	-20.632	0	0.4435	0.307	0.58	0.07	6.355	0	0.2864	0.174	0.399	0.057	4.998	0	1.1275	1.021	1.234	0.054	20.723	0	-0.1561
Other mental disorder	mental disorders	0.0782	-0.504	0.661	0.297	0.263	1.08134	0.604109	1.93673	22	6509	30	8323	0.792483	0.881129	not_significant	0.0339618	0.10101	1.4331	1.235	1.632	0.101	14.147	0	-0.0498	-0.055	-0.045	0.002	-20.554	0	0.4428	0.306	0.58	0.07	6.347	0	0.2902	0.178	0.402	0.057	5.068	0	1.1259	1.019	1.232	0.054	20.7	0	-0.1534
Other non-epithelial cancer of skin	neoplasms	-0.0266	-0.46	0.406	0.221	-0.121	0.973751	0.631284	1.5008	34	6497	70	8283	0.90407	0.94931	not_significant	-0.0115522	0.0437979	1.4323	1.233	1.631	0.101	14.119	0	-0.0498	-0.055	-0.045	0.002	-20.495	0	0.4427	0.306	0.579	0.07	6.347	0	0.2902	0.178	0.402	0.057	5.068	0	1.1258	1.019	1.232	0.054	20.699	0	-0.1533
Other nondiabetic retinopathy	sense organs	0.4434	-1.147	2.034	0.811	0.546	1.558	0.317588	7.6446	10	6521	10	8343	0.584735	0.747601	not_significant	0.192566	0.233041	1.4333	1.235	1.632	0.101	14.148	0	-0.0498	-0.055	-0.045	0.002	-20.556	0	0.4426	0.306	0.579	0.07	6.345	0	0.2902	0.178	0.402	0.057	5.068	0	1.1256	1.019	1.232	0.054	20.695	0	-0.1533
Other nonspecific findings on examination of urine	genitourinary	0.5809	0.11	1.052	0.24	2.416	1.78765	1.11628	2.86337	36	6495	40	8313	0.0156952	0.0658701	not_significant	0.252282	1.80423	1.4403	1.242	1.639	0.101	14.21	0	-0.0501	-0.055	-0.045	0.002	-20.64	0	0.4452	0.308	0.582	0.07	6.378	0	0.2903	0.178	0.403	0.057	5.068	0	1.1285	1.022	1.235	0.054	20.738	0	-0.1533
Other nutritional deficiency	endocrine/metabolic	0.9137	0.499	1.329	0.212	4.317	2.49353	1.64707	3.77726	61	6470	41	8312	1.58476e-05	0.000380918	mi_significant	0.396815	4.80004	1.4383	1.24	1.637	0.101	14.193	0	-0.0501	-0.055	-0.045	0.002	-20.637	0	0.4421	0.305	0.579	0.07	6.336	0	0.2825	0.17	0.395	0.057	4.927	0	1.128	1.021	1.235	0.054	20.729	0	-0.1574
Other open wound of head and face	injuries & poisonings	0.147	-0.361	0.655	0.259	0.567	1.15835	0.696979	1.92514	30	6501	36	8317	0.570573	0.7359	not_significant	0.0638413	0.243689	1.4325	1.234	1.631	0.101	14.141	0	-0.0498	-0.055	-0.045	0.002	-20.559	0	0.4436	0.307	0.58	0.07	6.357	0	0.2908	0.178	0.403	0.057	5.076	0	1.1263	1.02	1.233	0.054	20.705	0	-0.1528
Other paralytic syndromes	neurological	1.4164	0.242	2.591	0.599	2.363	4.12225	1.27379	13.3431	12	6519	10	8343	0.0181183	0.0741559	not_significant	0.615135	1.74188	1.4299	1.231	1.629	0.101	14.111	0	-0.0498	-0.055	-0.045	0.002	-20.537	0	0.4447	0.308	0.581	0.07	6.374	0	0.2901	0.178	0.402	0.057	5.065	0	1.1272	1.021	1.234	0.054	20.716	0	-0.1529
Other peripheral nerve disorders	neurological	0.1528	-0.069	0.375	0.113	1.35	1.16509	0.933327	1.45499	150	6381	213	8140	0.177116	0.354769	not_significant	0.0663602	0.751742	1.4358	1.237	1.634	0.101	14.17	0	-0.05	-0.055	-0.045	0.002	-20.593	0	0.4453	0.308	0.582	0.07	6.38	0	0.2925	0.18	0.405	0.057	5.105	0	1.1281	1.021	1.235	0.054	20.728	0	-0.153
Other persistent mental disorders due to conditions classified elsewhere	mental disorders	-0.0134	-1.056	1.029	0.532	-0.025	0.986689	0.347844	2.79827	10	6521	10	8343	0.979971	0.990307	not_significant	-0.00581955	0.00878682	1.4329	1.234	1.632	0.101	14.143	0	-0.0498	-0.055	-0.045	0.002	-20.546	0	0.4427	0.306	0.579	0.07	6.346	0	0.2902	0.178	0.402	0.057	5.067	0	1.1258	1.019	1.232	0.054	20.699	0	-0.1534
Other pulmonary inflamation or edema	respiratory	2.2316	0.809	3.654	0.726	3.075	9.31476	2.24566	38.6289	10	6521	10	8343	0.00210267	0.0154429	mi_significant	0.969172	2.67723	1.4442	1.245	1.643	0.101	14.245	0	-0.0502	-0.055	-0.045	0.002	-20.671	0	0.4456	0.309	0.582	0.07	6.384	0	0.2908	0.178	0.403	0.057	5.074	0	1.1281	1.021	1.235	0.054	20.729	0	-0.152
Other retinal disorders	sense organs	0.4361	-0.836	1.709	0.649	0.672	1.54666	0.433441	5.52344	10	6521	10	8343	0.501728	0.694539	not_significant	0.189396	0.299532	1.4327	1.234	1.631	0.101	14.143	0	-0.0498	-0.055	-0.045	0.002	-20.555	0	0.4429	0.306	0.58	0.07	6.349	0	0.2904	0.178	0.403	0.057	5.071	0	1.1263	1.02	1.233	0.054	20.705	0	-0.1531
Other signs and symptoms in breast	genitourinary	-0.1705	-2.491	2.15	1.184	-0.144	0.843243	0.0828271	8.58486	10	6521	10	8343	0.88553	0.941054	not_significant	-0.0740472	0.0527965	1.4329	1.234	1.631	0.101	14.145	0	-0.0498	-0.055	-0.045	0.002	-20.55	0	0.4427	0.306	0.579	0.07	6.346	0	0.2902	0.178	0.402	0.057	5.067	0	1.1258	1.019	1.232	0.054	20.698	0	-0.1533
Other signs and symptoms involving emotional state		0.2627	-0.235	0.76	0.254	1.035	1.30044	0.790571	2.13828	35	6496	35	8318	0.300554	0.50423	not_significant	0.114089	0.522077	1.4335	1.235	1.632	0.101	14.149	0	-0.0499	-0.055	-0.045	0.002	-20.56	0	0.4432	0.307	0.58	0.07	6.353	0	0.2884	0.176	0.401	0.057	5.034	0	1.1253	1.019	1.232	0.054	20.688	0	-0.1537
Other specified cardiac dysrhythmias	circulatory system	0.4089	0.116	0.702	0.149	2.738	1.50516	1.123	2.01778	97	6434	105	8248	0.00618822	0.0342294	mi_significant	0.177583	2.20843	1.4387	1.24	1.637	0.101	14.196	0	-0.0501	-0.055	-0.045	0.002	-20.647	0	0.4455	0.309	0.582	0.07	6.383	0	0.288	0.176	0.4	0.057	5.028	0	1.1284	1.022	1.235	0.054	20.737	0	-0.1535
Other specified congenital anomalies of kidney	congenital anomalies	1.7375	-0.049	3.524	0.912	1.906	5.68312	0.952181	33.9198	10	6521	10	8343	0.0566485	0.159884	not_significant	0.754587	1.24681	1.4372	1.239	1.636	0.101	14.178	0	-0.05	-0.055	-0.045	0.002	-20.591	0	0.4421	0.305	0.579	0.07	6.335	0	0.2915	0.179	0.404	0.057	5.09	0	1.1273	1.021	1.234	0.054	20.722	0	-0.1527
Other specified diffuse diseases of connective tissue	dermatologic	0.8704	-1.65	3.39	1.286	0.677	2.38787	0.19205	29.666	10	6521	10	8343	0.498431	0.693606	not_significant	0.37801	0.302395	1.4329	1.234	1.631	0.101	14.145	0	-0.0498	-0.055	-0.045	0.002	-20.552	0	0.4427	0.306	0.579	0.07	6.346	0	0.2899	0.178	0.402	0.057	5.061	0	1.1256	1.019	1.232	0.054	20.695	0	-0.1536
Other specified diseases of hair and hair follicles	dermatologic	-0.0131	-0.254	0.228	0.123	-0.107	0.986985	0.775692	1.25609	124	6407	180	8173	0.915012	0.957756	not_significant	-0.00568926	0.0385734	1.4331	1.235	1.632	0.101	14.146	0	-0.0498	-0.055	-0.045	0.002	-20.548	0	0.4426	0.306	0.579	0.07	6.345	0	0.2902	0.178	0.402	0.057	5.068	0	1.1258	1.019	1.232	0.054	20.699	0	-0.1533
Other specified diseases of sebaceous glands	dermatologic	0.1086	-0.264	0.481	0.19	0.572	1.11472	0.767974	1.61769	55	6476	73	8280	0.56738	0.733598	not_significant	0.0471644	0.246126	1.4349	1.236	1.634	0.101	14.157	0	-0.0499	-0.055	-0.045	0.002	-20.551	0	0.4432	0.306	0.58	0.07	6.353	0	0.29	0.178	0.402	0.057	5.064	0	1.126	1.019	1.233	0.054	20.702	0	-0.1526
Other specified diseases of the salivary glands	digestive	0.7454	-0.422	1.912	0.595	1.252	2.10728	0.655734	6.76661	10	6521	10	8343	0.210603	0.398269	not_significant	0.323723	0.676535	1.4339	1.235	1.632	0.101	14.155	0	-0.0499	-0.055	-0.045	0.002	-20.57	0	0.4435	0.307	0.58	0.07	6.357	0	0.2908	0.179	0.403	0.057	5.077	0	1.1261	1.02	1.233	0.054	20.703	0	-0.1536
Other specified disorders involving the immune mechanism	endocrine/metabolic	1.069	-0.382	2.52	0.74	1.444	2.91247	0.682495	12.4286	10	6521	10	8343	0.148734	0.317652	not_significant	0.464261	0.827589	1.4324	1.234	1.631	0.101	14.137	0	-0.0498	-0.055	-0.045	0.002	-20.555	0	0.4433	0.307	0.58	0.07	6.353	0	0.2901	0.178	0.402	0.057	5.066	0	1.1268	1.02	1.233	0.054	20.714	0	-0.1524
Other specified disorders of breast	genitourinary	-0.2869	-1.612	1.038	0.676	-0.424	0.750587	0.199488	2.82356	10	6521	10	8343	0.671226	0.798704	not_significant	-0.124599	0.173132	1.4334	1.235	1.632	0.101	14.149	0	-0.0498	-0.055	-0.045	0.002	-20.554	0	0.4429	0.306	0.58	0.07	6.348	0	0.2901	0.178	0.402	0.057	5.066	0	1.1257	1.019	1.232	0.054	20.696	0	-0.1536
Other specified disorders of plasma protein metabolism	endocrine/metabolic	0.7919	-0.018	1.602	0.413	1.917	2.20759	0.982161	4.96295	16	6515	12	8341	0.0552427	0.156718	not_significant	0.343918	1.25773	1.4359	1.237	1.635	0.101	14.171	0	-0.05	-0.055	-0.045	0.002	-20.592	0	0.4445	0.308	0.581	0.07	6.37	0	0.2905	0.178	0.403	0.057	5.074	0	1.1262	1.02	1.233	0.054	20.704	0	-0.1532
Other specified erythematous conditions	dermatologic	0.7436	0.237	1.25	0.258	2.88	2.10349	1.26744	3.49034	37	6494	29	8324	0.00397944	0.024022	mi_significant	0.322941	2.40018	1.4352	1.237	1.634	0.101	14.16	0	-0.05	-0.055	-0.045	0.002	-20.598	0	0.4451	0.308	0.582	0.07	6.377	0	0.2904	0.178	0.403	0.057	5.07	0	1.1279	1.021	1.235	0.054	20.73	0	-0.1538
Other specified gastritis	digestive	0.3812	-0.644	1.406	0.523	0.729	1.46404	0.525187	4.0796	10	6521	10	8343	0.466074	0.666108	not_significant	0.165553	0.331545	1.4322	1.234	1.631	0.101	14.137	0	-0.0498	-0.055	-0.045	0.002	-20.557	0	0.4437	0.307	0.581	0.07	6.359	0	0.2914	0.179	0.404	0.057	5.086	0	1.1269	1.02	1.234	0.054	20.71	0	-0.1522
Other specified osteoporosis		1.5739	-0.733	3.88	1.177	1.337	4.82543	0.480465	48.4242	10	6521	10	8343	0.181082	0.360529	not_significant	0.683536	0.742124	1.4316	1.233	1.63	0.101	14.13	0	-0.0498	-0.055	-0.045	0.002	-20.554	0	0.4437	0.307	0.58	0.07	6.358	0	0.292	0.18	0.404	0.057	5.098	0	1.1277	1.021	1.234	0.054	20.725	0	-0.1515
Other sprains and strains		0.0466	-0.451	0.544	0.254	0.184	1.0477	0.636991	1.72288	28	6503	40	8313	0.854387	0.920537	not_significant	0.0202381	0.0683456	1.4329	1.234	1.631	0.101	14.144	0	-0.0498	-0.055	-0.045	0.002	-20.553	0	0.4429	0.306	0.58	0.07	6.348	0	0.2901	0.178	0.402	0.057	5.065	0	1.126	1.019	1.233	0.054	20.7	0	-0.1534
Other symptoms		0.2533	0.092	0.415	0.082	3.071	1.28827	1.09636	1.51437	300	6231	400	7953	0.00213611	0.0156019	mi_significant	0.110007	2.67038	1.4422	1.243	1.641	0.101	14.226	0	-0.0502	-0.055	-0.045	0.002	-20.661	0	0.4388	0.302	0.576	0.07	6.289	0	0.285	0.173	0.397	0.057	4.973	0	1.1238	1.017	1.23	0.054	20.656	0	-0.1715
Other symptoms involving abdomen and pelvis	digestive	0.0022	-0.449	0.453	0.23	0.009	1.0022	0.638266	1.57302	32	6499	57	8296	0.992452	0.995464	not_significant	0.000955448	0.00329046	1.433	1.234	1.632	0.101	14.144	0	-0.0498	-0.055	-0.045	0.002	-20.542	0	0.4427	0.306	0.579	0.07	6.346	0	0.2902	0.178	0.402	0.057	5.068	0	1.1258	1.019	1.232	0.054	20.696	0	-0.1534
Other symptoms involving urinary system	genitourinary	0.4305	0.138	0.723	0.149	2.885	1.53803	1.14798	2.06061	96	6435	107	8246	0.00391091	0.0239362	mi_significant	0.186964	2.40772	1.444	1.245	1.643	0.101	14.238	0	-0.0503	-0.055	-0.046	0.002	-20.685	0	0.4459	0.309	0.583	0.07	6.389	0	0.2908	0.179	0.403	0.057	5.076	0	1.1295	1.023	1.236	0.054	20.752	0	-0.1514
Other symptoms referable to back	musculoskeletal	-0.0166	-0.435	0.402	0.213	-0.078	0.983537	0.647265	1.49481	37	6494	63	8290	0.937852	0.973187	not_significant	-0.00720929	0.0278655	1.4329	1.234	1.631	0.101	14.145	0	-0.0498	-0.055	-0.045	0.002	-20.543	0	0.4426	0.306	0.579	0.07	6.345	0	0.2902	0.178	0.402	0.057	5.068	0	1.1257	1.019	1.232	0.054	20.691	0	-0.1534
Other symptoms/disorders or the urinary system	genitourinary	1.2062	0.703	1.709	0.257	4.701	3.34077	2.0198	5.52344	47	6484	27	8326	2.5951e-06	9.02822e-05	mi_significant	0.523846	5.58585	1.4482	1.249	1.647	0.101	14.276	0	-0.0504	-0.055	-0.046	0.002	-20.754	0	0.446	0.309	0.583	0.07	6.388	0	0.2891	0.177	0.401	0.057	5.044	0	1.1322	1.025	1.239	0.054	20.79	0	-0.1492
Other tests		0.319	0.21	0.428	0.056	5.737	1.37575	1.23368	1.53419	798	5733	787	7566	9.62029e-09	9.88995e-07	mi_significant	0.13854	8.01681	1.3935	1.194	1.593	0.102	13.714	0	-0.05	-0.055	-0.045	0.002	-20.611	0	0.4522	0.315	0.589	0.07	6.474	0	0.3054	0.193	0.418	0.057	5.319	0	1.1423	1.035	1.249	0.055	20.936	0	-0.1347
Other unspecified back disorders	musculoskeletal	-0.0433	-0.932	0.846	0.454	-0.095	0.957624	0.393765	2.33031	10	6521	15	8338	0.923968	0.964077	not_significant	-0.018805	0.034343	1.4328	1.234	1.631	0.101	14.142	0	-0.0498	-0.055	-0.045	0.002	-20.543	0	0.4427	0.306	0.579	0.07	6.346	0	0.2903	0.178	0.403	0.057	5.069	0	1.1258	1.019	1.232	0.054	20.696	0	-0.1534
Other upper respiratory disease	respiratory	0.2289	0.063	0.395	0.085	2.699	1.25722	1.06503	1.48438	295	6236	346	8007	0.0069525	0.0366184	mi_significant	0.09941	2.15786	1.4289	1.23	1.627	0.101	14.1	0	-0.05	-0.055	-0.045	0.002	-20.592	0	0.4421	0.305	0.579	0.07	6.336	0	0.2891	0.177	0.401	0.057	5.048	0	1.1281	1.021	1.235	0.054	20.733	0	-0.1571
Other venous embolism and thrombosis	circulatory system	0.6966	0.226	1.167	0.24	2.903	2.00692	1.25358	3.21234	42	6489	37	8316	0.00369716	0.0229467	mi_significant	0.30253	2.43213	1.4367	1.238	1.635	0.101	14.178	0	-0.05	-0.055	-0.045	0.002	-20.626	0	0.4426	0.306	0.579	0.07	6.342	0	0.2907	0.178	0.403	0.057	5.075	0	1.1288	1.022	1.235	0.054	20.745	0	-0.153
Other vitamin B12 deficiency anemia	hematopoietic	2.2088	-0.345	4.762	1.303	1.695	9.10478	0.70822	116.98	10	6521	10	8343	0.0899894	0.222366	not_significant	0.95927	1.04581	1.4355	1.237	1.634	0.101	14.169	0	-0.0499	-0.055	-0.045	0.002	-20.586	0	0.4433	0.307	0.58	0.07	6.355	0	0.2908	0.179	0.403	0.057	5.078	0	1.1249	1.018	1.232	0.054	20.682	0	-0.1532
Otitis externa	sense organs	-0.1312	-0.44	0.178	0.158	-0.832	0.877042	0.644036	1.19483	68	6463	120	8233	0.405152	0.614233	not_significant	-0.0569794	0.392382	1.4337	1.235	1.632	0.101	14.152	0	-0.0498	-0.055	-0.045	0.002	-20.537	0	0.4417	0.305	0.578	0.07	6.331	0	0.2904	0.178	0.403	0.057	5.07	0	1.1245	1.018	1.231	0.054	20.666	0	-0.1536
Otitis media	sense organs	-0.0745	-0.476	0.327	0.205	-0.363	0.928207	0.621263	1.3868	41	6490	65	8288	0.716432	0.836147	not_significant	-0.0323549	0.144825	1.434	1.235	1.633	0.101	14.151	0	-0.0498	-0.055	-0.045	0.002	-20.554	0	0.4421	0.305	0.579	0.07	6.335	0	0.29	0.178	0.402	0.057	5.064	0	1.1251	1.018	1.232	0.054	20.675	0	-0.1537
Otorrhea	sense organs	0.3295	-0.553	1.212	0.45	0.732	1.39027	0.575222	3.3602	10	6521	14	8339	0.464121	0.664035	not_significant	0.1431	0.333368	1.4343	1.236	1.633	0.101	14.156	0	-0.0499	-0.055	-0.045	0.002	-20.562	0	0.4427	0.306	0.579	0.07	6.346	0	0.2902	0.178	0.402	0.057	5.068	0	1.1259	1.019	1.232	0.054	20.699	0	-0.1543
Otosclerosis	sense organs	-1.2978	-3.485	0.889	1.116	-1.163	0.273132	0.0306538	2.4327	10	6521	10	8343	0.244839	0.434465	not_significant	-0.563627	0.61112	1.4312	1.233	1.63	0.101	14.129	0	-0.0498	-0.055	-0.045	0.002	-20.534	0	0.4427	0.306	0.579	0.07	6.346	0	0.291	0.179	0.403	0.057	5.081	0	1.1265	1.02	1.233	0.054	20.71	0	-0.1531
Overweight, obesity and other hyperalimentation	endocrine/metabolic	0.2167	0.002	0.431	0.109	1.979	1.24197	1.002	1.5388	168	6363	205	8148	0.0478472	0.142786	not_significant	0.0941116	1.32014	1.4334	1.235	1.632	0.101	14.147	0	-0.0499	-0.055	-0.045	0.002	-20.588	0	0.4379	0.301	0.575	0.07	6.273	0	0.2891	0.177	0.401	0.057	5.047	0	1.1269	1.02	1.234	0.054	20.715	0	-0.1564
Pain in joint	musculoskeletal	0.1529	0.043	0.263	0.056	2.719	1.16521	1.04394	1.30083	688	5843	881	7472	0.00655196	0.0353143	mi_significant	0.0664036	2.18363	1.4239	1.225	1.623	0.101	14.043	0	-0.0501	-0.055	-0.045	0.002	-20.635	0	0.4536	0.317	0.591	0.07	6.489	0	0.2953	0.183	0.408	0.057	5.152	0	1.1338	1.027	1.241	0.054	20.805	0	-0.1525
Pain in limb	symptoms	0.1217	-0.002	0.246	0.063	1.923	1.12942	0.998002	1.2789	518	6013	708	7645	0.0544196	0.155895	not_significant	0.0528536	1.26424	1.4329	1.234	1.632	0.101	14.139	0	-0.0501	-0.055	-0.045	0.002	-20.618	0	0.449	0.312	0.586	0.07	6.428	0	0.293	0.181	0.405	0.057	5.113	0	1.1291	1.022	1.236	0.054	20.746	0	-0.1556
Pain, swelling or discharge of eye	sense organs	0.3233	-0.086	0.733	0.209	1.547	1.38168	0.917594	2.08132	47	6484	56	8297	0.121942	0.275351	not_significant	0.140407	0.913846	1.4355	1.237	1.634	0.101	14.168	0	-0.05	-0.055	-0.045	0.002	-20.591	0	0.4432	0.306	0.58	0.07	6.352	0	0.2911	0.179	0.403	0.057	5.083	0	1.127	1.02	1.234	0.054	20.716	0	-0.1531
Painful respiration	respiratory	0.0719	-0.189	0.333	0.133	0.54	1.07455	0.827787	1.39515	101	6430	156	8197	0.58926	0.750049	not_significant	0.0312258	0.229693	1.4328	1.234	1.631	0.101	14.144	0	-0.0499	-0.055	-0.045	0.002	-20.559	0	0.4436	0.307	0.58	0.07	6.357	0	0.291	0.179	0.403	0.057	5.079	0	1.1271	1.02	1.234	0.054	20.702	0	-0.153
Pallor and flushing	symptoms	0.3233	-0.457	1.104	0.398	0.812	1.38168	0.63318	3.01621	14	6517	14	8339	0.416903	0.627015	not_significant	0.140407	0.379965	1.4324	1.234	1.631	0.101	14.14	0	-0.0498	-0.055	-0.045	0.002	-20.553	0	0.4427	0.306	0.579	0.07	6.346	0	0.2902	0.178	0.402	0.057	5.067	0	1.126	1.019	1.233	0.054	20.702	0	-0.1535
Palpitations	circulatory system	0.4094	0.194	0.625	0.11	3.72	1.50591	1.2141	1.86825	183	6348	186	8167	0.000199043	0.00260529	mi_significant	0.1778	3.70105	1.4321	1.233	1.631	0.101	14.126	0	-0.0501	-0.055	-0.045	0.002	-20.643	0	0.45	0.313	0.587	0.07	6.446	0	0.2935	0.181	0.406	0.057	5.123	0	1.1305	1.024	1.237	0.054	20.767	0	-0.1537
Pancreatic cancer	neoplasms	2.0343	-0.202	4.271	1.141	1.783	7.6469	0.817095	71.5932	10	6521	10	8343	0.0746091	0.192643	not_significant	0.883485	1.12721	1.4364	1.238	1.635	0.101	14.174	0	-0.0499	-0.055	-0.045	0.002	-20.579	0	0.4399	0.303	0.577	0.07	6.304	0	0.2903	0.178	0.403	0.057	5.069	0	1.1256	1.019	1.232	0.054	20.694	0	-0.1541
Pancytopenia	hematopoietic	0.6567	-0.128	1.441	0.4	1.64	1.92842	0.879853	4.22492	18	6513	13	8340	0.100913	0.237803	not_significant	0.285201	0.996052	1.4338	1.235	1.632	0.101	14.154	0	-0.0499	-0.055	-0.045	0.002	-20.574	0	0.4432	0.306	0.58	0.07	6.352	0	0.2907	0.178	0.403	0.057	5.076	0	1.1254	1.019	1.232	0.054	20.688	0	-0.1533
Paralysis/spasm of vocal cords or larynx	respiratory	0.439	-0.577	1.455	0.518	0.847	1.55116	0.561581	4.28448	10	6521	10	8343	0.396869	0.605181	not_significant	0.190655	0.401353	1.4325	1.234	1.631	0.101	14.14	0	-0.0498	-0.055	-0.045	0.002	-20.548	0	0.4425	0.306	0.579	0.07	6.344	0	0.2902	0.178	0.402	0.057	5.067	0	1.1256	1.019	1.232	0.054	20.694	0	-0.1542
Paralytic ileus	digestive	0.7496	-0.14	1.639	0.454	1.651	2.11615	0.869358	5.15002	13	6518	10	8343	0.0986466	0.234974	not_significant	0.325547	1.00592	1.4331	1.235	1.632	0.101	14.145	0	-0.0499	-0.055	-0.045	0.002	-20.568	0	0.4439	0.307	0.581	0.07	6.362	0	0.2913	0.179	0.404	0.057	5.086	0	1.1264	1.02	1.233	0.054	20.706	0	-0.1528
Paralytic strabismus	sense organs	1.3084	-0.389	3.006	0.866	1.511	3.70025	0.677734	20.2064	10	6521	10	8343	0.130818	0.288717	not_significant	0.568231	0.883333	1.4331	1.234	1.632	0.101	14.145	0	-0.0498	-0.055	-0.045	0.002	-20.555	0	0.4424	0.306	0.579	0.07	6.34	0	0.2898	0.178	0.402	0.057	5.059	0	1.1261	1.02	1.233	0.054	20.703	0	-0.1534
Paranoid disorders	mental disorders	-0.0366	-1.499	1.426	0.746	-0.049	0.964062	0.223353	4.16202	10	6521	10	8343	0.960876	0.983949	not_significant	-0.0158952	0.0173328	1.4331	1.234	1.632	0.101	14.144	0	-0.0498	-0.055	-0.045	0.002	-20.551	0	0.4427	0.306	0.579	0.07	6.346	0	0.2902	0.178	0.402	0.057	5.067	0	1.1258	1.019	1.232	0.054	20.698	0	-0.1534
Paraproteinemia	endocrine/metabolic	1.7617	0.135	3.389	0.83	2.122	5.82233	1.14454	29.6363	10	6521	10	8343	0.0338172	0.113181	not_significant	0.765097	1.47086	1.4376	1.239	1.636	0.101	14.184	0	-0.05	-0.055	-0.045	0.002	-20.605	0	0.4449	0.308	0.582	0.07	6.376	0	0.2923	0.18	0.405	0.057	5.103	0	1.1267	1.02	1.233	0.054	20.71	0	-0.1519
Parasomnia	neurological	0.4761	-0.223	1.175	0.357	1.335	1.60978	0.800115	3.23814	18	6513	17	8336	0.18178	0.361373	not_significant	0.206768	0.740454	1.4327	1.234	1.631	0.101	14.143	0	-0.0499	-0.055	-0.045	0.002	-20.562	0	0.4413	0.305	0.578	0.07	6.325	0	0.2907	0.178	0.403	0.057	5.077	0	1.1263	1.02	1.233	0.054	20.707	0	-0.1536
Parkinson's disease	neurological	3.0307	0.837	5.225	1.119	2.707	20.7117	2.30943	185.861	10	6521	10	8343	0.0067802	0.0360627	mi_significant	1.31622	2.16876	1.4518	1.253	1.651	0.102	14.298	0	-0.0503	-0.055	-0.046	0.002	-20.694	0	0.4433	0.307	0.58	0.07	6.352	0	0.2885	0.176	0.401	0.057	5.036	0	1.1254	1.019	1.232	0.054	20.685	0	-0.1538
Paroxysmal supraventricular tachycardia	circulatory system	1.0997	0.467	1.732	0.323	3.407	3.00326	1.5952	5.65195	28	6503	18	8335	0.000657178	0.00643547	mi_significant	0.477594	3.18232	1.4439	1.245	1.643	0.101	14.24	0	-0.0502	-0.055	-0.045	0.002	-20.669	0	0.4444	0.308	0.581	0.07	6.368	0	0.2901	0.178	0.402	0.057	5.063	0	1.1266	1.02	1.233	0.054	20.707	0	-0.1543
Paroxysmal tachycardia, unspecified	circulatory system	2.325	0.766	3.884	0.796	2.923	10.2267	2.15114	48.6183	10	6521	10	8343	0.00347146	0.022124	mi_significant	1.00973	2.45949	1.4379	1.239	1.637	0.101	14.185	0	-0.05	-0.055	-0.045	0.002	-20.588	0	0.4429	0.306	0.58	0.07	6.348	0	0.2903	0.178	0.403	0.057	5.069	0	1.1261	1.019	1.233	0.054	20.702	0	-0.158
Paroxysmal ventricular tachycardia	circulatory system	1.0478	0.345	1.75	0.358	2.923	2.85137	1.41199	5.7546	19	6512	17	8336	0.00346807	0.022124	mi_significant	0.455054	2.45991	1.4489	1.25	1.648	0.101	14.277	0	-0.0503	-0.055	-0.046	0.002	-20.691	0	0.4448	0.308	0.582	0.07	6.373	0	0.2909	0.179	0.403	0.057	5.078	0	1.127	1.02	1.234	0.054	20.713	0	-0.1537
Partial epilepsy	neurological	1.4418	0.141	2.742	0.663	2.173	4.2283	1.15142	15.518	11	6520	10	8343	0.0297838	0.103616	not_significant	0.626166	1.52602	1.4308	1.232	1.629	0.101	14.123	0	-0.0498	-0.055	-0.045	0.002	-20.533	0	0.4423	0.306	0.579	0.07	6.34	0	0.2876	0.175	0.4	0.057	5.019	0	1.1254	1.019	1.232	0.054	20.69	0	-0.1539
Pathologic fracture	musculoskeletal	1.0226	0.152	1.893	0.444	2.302	2.78041	1.16416	6.63926	16	6515	10	8343	0.021332	0.0824747	not_significant	0.44411	1.67097	1.4348	1.236	1.633	0.101	14.162	0	-0.05	-0.055	-0.045	0.002	-20.594	0	0.4442	0.307	0.581	0.07	6.366	0	0.2909	0.179	0.403	0.057	5.078	0	1.1274	1.021	1.234	0.054	20.72	0	-0.1512
Pathologic fracture of vertebrae	musculoskeletal	0.9737	-0.246	2.194	0.623	1.564	2.64772	0.781922	8.97103	10	6521	10	8343	0.117804	0.268511	not_significant	0.422873	0.928841	1.4371	1.238	1.636	0.101	14.18	0	-0.0499	-0.055	-0.045	0.002	-20.587	0	0.4418	0.305	0.579	0.07	6.333	0	0.2889	0.177	0.401	0.057	5.044	0	1.126	1.019	1.233	0.054	20.7	0	-0.1533
Pathological, developmental or recurrent dislocation	musculoskeletal	-0.9243	-2.518	0.669	0.813	-1.137	0.396809	0.0806207	1.95228	10	6521	10	8343	0.255548	0.447842	not_significant	-0.401418	0.592528	1.433	1.234	1.631	0.101	14.146	0	-0.0498	-0.055	-0.045	0.002	-20.55	0	0.4424	0.306	0.579	0.07	6.342	0	0.2906	0.178	0.403	0.057	5.074	0	1.1258	1.019	1.232	0.054	20.699	0	-0.1528
Pectus excavatum	congenital anomalies	0.0139	-1.48	1.508	0.762	0.018	1.014	0.227638	4.51769	10	6521	10	8343	0.985422	0.991421	not_significant	0.00603669	0.0063778	1.433	1.234	1.632	0.101	14.145	0	-0.0498	-0.055	-0.045	0.002	-20.552	0	0.4427	0.306	0.579	0.07	6.346	0	0.2902	0.178	0.402	0.057	5.067	0	1.1258	1.019	1.232	0.054	20.699	0	-0.1534
Peptic ulcer, site unspecified	digestive	0.8748	0.244	1.506	0.322	2.718	2.3984	1.27634	4.50866	23	6508	20	8333	0.00657135	0.0353143	mi_significant	0.379921	2.18235	1.4411	1.242	1.64	0.101	14.215	0	-0.0501	-0.055	-0.045	0.002	-20.639	0	0.4427	0.306	0.579	0.07	6.346	0	0.2905	0.178	0.403	0.057	5.071	0	1.1273	1.021	1.234	0.054	20.723	0	-0.1549
Perforation of tympanic membrane	sense organs	0.157	-0.477	0.791	0.324	0.485	1.17	0.620643	2.2056	18	6513	23	8330	0.62773	0.776333	not_significant	0.0681842	0.202227	1.4332	1.235	1.632	0.101	14.147	0	-0.0499	-0.055	-0.045	0.002	-20.556	0	0.4428	0.306	0.58	0.07	6.348	0	0.2901	0.178	0.402	0.057	5.066	0	1.126	1.019	1.233	0.054	20.702	0	-0.1533
Periapical abscess	digestive	0.4893	-0.499	1.478	0.504	0.97	1.63117	0.607137	4.38417	10	6521	10	8343	0.332006	0.539203	not_significant	0.2125	0.478855	1.4331	1.235	1.632	0.101	14.146	0	-0.0499	-0.055	-0.045	0.002	-20.561	0	0.4435	0.307	0.58	0.07	6.357	0	0.2908	0.179	0.403	0.057	5.077	0	1.1264	1.02	1.233	0.054	20.708	0	-0.1525
Pericarditis	circulatory system	0.5494	-0.242	1.341	0.404	1.361	1.73221	0.785056	3.82286	17	6514	13	8340	0.173611	0.349765	not_significant	0.238601	0.760423	1.4344	1.236	1.633	0.101	14.157	0	-0.0499	-0.055	-0.045	0.002	-20.574	0	0.4431	0.306	0.58	0.07	6.352	0	0.2912	0.179	0.403	0.057	5.085	0	1.1258	1.019	1.232	0.054	20.697	0	-0.1525
Peripheral autonomic neuropathy	neurological	0.5109	-2.304	3.326	1.436	0.356	1.66679	0.0998586	27.8268	10	6521	10	8343	0.72208	0.841049	not_significant	0.221881	0.141414	1.4326	1.234	1.631	0.101	14.141	0	-0.0498	-0.055	-0.045	0.002	-20.553	0	0.4431	0.306	0.58	0.07	6.351	0	0.2906	0.178	0.403	0.057	5.073	0	1.1262	1.02	1.233	0.054	20.702	0	-0.153
Peripheral enthesopathies and allied syndromes	musculoskeletal	-0.0431	-0.226	0.14	0.093	-0.463	0.957816	0.797718	1.15027	204	6327	345	8008	0.64344	0.783402	not_significant	-0.0187181	0.191492	1.4318	1.233	1.63	0.101	14.131	0	-0.0498	-0.055	-0.045	0.002	-20.471	0	0.4416	0.305	0.578	0.07	6.327	0	0.29	0.178	0.402	0.057	5.063	0	1.1249	1.018	1.232	0.054	20.667	0	-0.1535
Peripheral or central vertigo	sense organs	0.1504	-0.277	0.578	0.218	0.69	1.1623	0.758054	1.78247	40	6491	54	8299	0.490292	0.685165	not_significant	0.0653179	0.309545	1.4328	1.234	1.631	0.101	14.144	0	-0.0499	-0.055	-0.045	0.002	-20.561	0	0.4437	0.307	0.58	0.07	6.359	0	0.2905	0.178	0.403	0.057	5.072	0	1.1264	1.02	1.233	0.054	20.707	0	-0.1532
Peripheral retinal degenerations	sense organs	-0.5867	-1.546	0.373	0.49	-1.198	0.55616	0.213099	1.45208	10	6521	18	8335	0.230824	0.418012	not_significant	-0.254801	0.63672	1.4328	1.234	1.631	0.101	14.142	0	-0.0498	-0.055	-0.045	0.002	-20.536	0	0.4418	0.305	0.579	0.07	6.333	0	0.2898	0.178	0.402	0.057	5.061	0	1.1253	1.019	1.232	0.054	20.689	0	-0.1532
Peripheral vascular disease, unspecified	circulatory system	1.3656	0.671	2.06	0.354	3.855	3.91807	1.95619	7.84597	24	6507	14	8339	0.000115694	0.00173803	mi_significant	0.593073	3.93669	1.4486	1.25	1.648	0.101	14.276	0	-0.0504	-0.055	-0.046	0.002	-20.726	0	0.4485	0.312	0.585	0.07	6.425	0	0.2928	0.18	0.405	0.057	5.108	0	1.1308	1.024	1.237	0.054	20.77	0	-0.1495
Peritoneal adhesions (postoperative) (postinfection)	digestive	0.7368	-0.196	1.669	0.476	1.549	2.08924	0.822012	5.30686	12	6519	10	8343	0.121442	0.275351	not_significant	0.319988	0.91563	1.4352	1.237	1.634	0.101	14.165	0	-0.0499	-0.055	-0.045	0.002	-20.575	0	0.4408	0.304	0.578	0.07	6.317	0	0.2896	0.177	0.402	0.057	5.056	0	1.1252	1.019	1.232	0.054	20.687	0	-0.1543
Peritoneal or intestinal adhesions	digestive	1.327	-0.857	3.511	1.114	1.191	3.76972	0.424433	33.4817	10	6521	10	8343	0.233633	0.419928	not_significant	0.576309	0.631465	1.4304	1.232	1.629	0.101	14.118	0	-0.0498	-0.055	-0.045	0.002	-20.528	0	0.4431	0.306	0.58	0.07	6.352	0	0.2901	0.178	0.402	0.057	5.066	0	1.1253	1.019	1.232	0.054	20.688	0	-0.1533
Peritonitis and retroperitoneal infections	digestive	0.3578	-0.314	1.03	0.343	1.044	1.43018	0.730519	2.80107	17	6514	20	8333	0.296501	0.499966	not_significant	0.155391	0.527974	1.4325	1.234	1.631	0.101	14.141	0	-0.0498	-0.055	-0.045	0.002	-20.559	0	0.443	0.306	0.58	0.07	6.351	0	0.2906	0.178	0.403	0.057	5.074	0	1.1267	1.02	1.233	0.054	20.711	0	-0.1536
Pernicious anemia	hematopoietic	1.2985	-0.257	2.854	0.794	1.636	3.6638	0.773368	17.3571	10	6521	10	8343	0.101789	0.239015	not_significant	0.563931	0.992298	1.4352	1.237	1.634	0.101	14.167	0	-0.0499	-0.055	-0.045	0.002	-20.58	0	0.4411	0.304	0.578	0.07	6.322	0	0.2905	0.178	0.403	0.057	5.072	0	1.1259	1.019	1.232	0.054	20.7	0	-0.1542
Persistent vomiting		-0.4244	-3.542	2.694	1.591	-0.267	0.654162	0.0289554	14.7907	10	6521	10	8343	0.789633	0.878699	not_significant	-0.184315	0.102575	1.4333	1.235	1.632	0.101	14.148	0	-0.0498	-0.055	-0.045	0.002	-20.554	0	0.4427	0.306	0.579	0.07	6.346	0	0.2902	0.178	0.402	0.057	5.068	0	1.126	1.019	1.233	0.054	20.701	0	-0.1533
Personal history of diseases of blood and blood-forming organs	hematopoietic	0.8159	0.125	1.507	0.353	2.314	2.26121	1.13315	4.51317	24	6507	14	8339	0.0206714	0.0810578	not_significant	0.354341	1.68463	1.4286	1.23	1.627	0.101	14.099	0	-0.0498	-0.055	-0.045	0.002	-20.533	0	0.445	0.308	0.582	0.07	6.377	0	0.2905	0.178	0.403	0.057	5.072	0	1.1271	1.021	1.234	0.054	20.717	0	-0.1527
Personal history of diseases of digestive system	digestive	0.4369	0.142	0.732	0.15	2.905	1.5479	1.15258	2.07923	94	6437	104	8249	0.00366834	0.0228752	mi_significant	0.189743	2.43553	1.4435	1.245	1.642	0.101	14.235	0	-0.0502	-0.055	-0.045	0.002	-20.673	0	0.4433	0.307	0.58	0.07	6.353	0	0.2889	0.177	0.401	0.057	5.042	0	1.1277	1.021	1.234	0.054	20.725	0	-0.1546
Persons encountering health services in circumstances related to reproduction		1.8883	1.637	2.139	0.128	14.752	6.60813	5.13973	8.49094	411	6120	79	8274	2.99931e-49	3.96508e-46	mi_significant	0.820078	48.523	1.3484	1.148	1.549	0.102	13.195	0	-0.0495	-0.054	-0.045	0.002	-20.27	0	0.4979	0.36	0.636	0.07	7.086	0	0.333	0.22	0.447	0.058	5.75	0	1.1266	1.019	1.235	0.055	20.442	0	-0.129
Persons with potential health hazards related to socioeconomic, psychosocial, and other circumstances		0.1906	0.087	0.294	0.053	3.612	1.20998	1.0909	1.34178	806	5725	1030	7323	0.00030418	0.00362276	mi_significant	0.0827765	3.51687	1.4379	1.239	1.637	0.101	14.183	0	-0.0505	-0.055	-0.046	0.002	-20.746	0	0.4451	0.308	0.582	0.07	6.378	0	0.2835	0.171	0.396	0.057	4.946	0	1.1313	1.025	1.238	0.054	20.782	0	-0.16
Pervasive developmental disorders	mental disorders	-0.2672	-0.885	0.351	0.315	-0.847	0.76552	0.412714	1.42049	16	6515	32	8321	0.396893	0.605181	not_significant	-0.116043	0.401327	1.4339	1.235	1.632	0.101	14.154	0	-0.0498	-0.055	-0.045	0.002	-20.552	0	0.4416	0.305	0.578	0.07	6.33	0	0.2902	0.178	0.402	0.057	5.067	0	1.1252	1.019	1.232	0.054	20.685	0	-0.1533
Peyronie's disease	genitourinary	0.8662	0.089	1.643	0.396	2.186	2.37786	1.09308	5.17066	17	6514	13	8340	0.0288409	0.102144	not_significant	0.376186	1.53999	1.4401	1.241	1.639	0.101	14.203	0	-0.0501	-0.055	-0.045	0.002	-20.619	0	0.4449	0.308	0.582	0.07	6.375	0	0.291	0.179	0.403	0.057	5.081	0	1.1259	1.019	1.233	0.054	20.697	0	-0.1529
Phlebitis and thrombophlebitis	circulatory system	0.5018	-0.568	1.572	0.546	0.919	1.65169	0.566658	4.81627	10	6521	10	8343	0.35809	0.562896	not_significant	0.217929	0.446007	1.4326	1.234	1.631	0.101	14.14	0	-0.0498	-0.055	-0.045	0.002	-20.555	0	0.4431	0.306	0.58	0.07	6.352	0	0.2906	0.178	0.403	0.057	5.074	0	1.1265	1.02	1.233	0.054	20.709	0	-0.1532
Phlebitis and thrombophlebitis of intracranial venous sinuses	neurological	-0.0524	-3.118	3.013	1.564	-0.034	0.948949	0.0442456	20.3484	10	6521	10	8343	0.973247	0.988957	not_significant	-0.022757	0.0117769	1.433	1.234	1.632	0.101	14.146	0	-0.0498	-0.055	-0.045	0.002	-20.553	0	0.4427	0.306	0.579	0.07	6.346	0	0.2902	0.178	0.402	0.057	5.067	0	1.1258	1.019	1.232	0.054	20.699	0	-0.1534
Phlebitis and thrombophlebitis of lower extremities	circulatory system	0.6171	-1.062	2.296	0.857	0.72	1.85354	0.345764	9.93437	10	6521	10	8343	0.471239	0.67059	not_significant	0.268003	0.326759	1.4328	1.234	1.631	0.101	14.144	0	-0.0499	-0.055	-0.045	0.002	-20.561	0	0.4439	0.307	0.581	0.07	6.361	0	0.2913	0.179	0.404	0.057	5.085	0	1.1268	1.02	1.233	0.054	20.709	0	-0.1522
Phobia	mental disorders	0.5089	-0.101	1.119	0.311	1.636	1.66346	0.903933	3.06179	22	6509	22	8331	0.101773	0.239015	not_significant	0.221012	0.992367	1.4342	1.236	1.633	0.101	14.155	0	-0.0499	-0.055	-0.045	0.002	-20.569	0	0.4408	0.304	0.578	0.07	6.318	0	0.2886	0.176	0.401	0.057	5.038	0	1.1264	1.02	1.233	0.054	20.709	0	-0.1547
Pigmentary iris degeneration	sense organs	0.3709	-1.139	1.881	0.77	0.481	1.44904	0.320139	6.56006	10	6521	10	8343	0.630256	0.776476	not_significant	0.16108	0.200483	1.4332	1.235	1.632	0.101	14.148	0	-0.0498	-0.055	-0.045	0.002	-20.556	0	0.4424	0.306	0.579	0.07	6.341	0	0.2904	0.178	0.403	0.057	5.07	0	1.126	1.019	1.233	0.054	20.702	0	-0.1536
Pilonidal cyst	dermatologic	0.0988	-0.898	1.096	0.509	0.194	1.10385	0.407384	2.99217	10	6521	10	8343	0.846038	0.917948	not_significant	0.0429083	0.0726101	1.4327	1.234	1.631	0.101	14.142	0	-0.0498	-0.055	-0.045	0.002	-20.549	0	0.4428	0.306	0.58	0.07	6.347	0	0.2901	0.178	0.402	0.057	5.065	0	1.1258	1.019	1.232	0.054	20.699	0	-0.1535
Pituitary dwarfism		0.4385	-1.402	2.279	0.939	0.467	1.55038	0.246104	9.76691	10	6521	10	8343	0.640484	0.782551	not_significant	0.190438	0.193492	1.4323	1.234	1.631	0.101	14.136	0	-0.0498	-0.055	-0.045	0.002	-20.544	0	0.4425	0.306	0.579	0.07	6.343	0	0.29	0.178	0.402	0.057	5.064	0	1.1258	1.019	1.232	0.054	20.699	0	-0.1532
Pituitary hyperfunction	endocrine/metabolic	1.5029	0.472	2.534	0.526	2.858	4.4947	1.6032	12.6038	16	6515	10	8343	0.00426667	0.0252939	mi_significant	0.652701	2.36991	1.4288	1.23	1.627	0.101	14.098	0	-0.0498	-0.055	-0.045	0.002	-20.524	0	0.4396	0.303	0.576	0.07	6.297	0	0.2912	0.179	0.403	0.057	5.083	0	1.1272	1.021	1.234	0.054	20.718	0	-0.1539
Pituitary hypofunction	endocrine/metabolic	1.3977	0.647	2.149	0.383	3.647	4.04588	1.9098	8.57628	24	6507	11	8342	0.000265473	0.00324959	mi_significant	0.607013	3.57598	1.4321	1.234	1.631	0.101	14.134	0	-0.0499	-0.055	-0.045	0.002	-20.561	0	0.4429	0.306	0.58	0.07	6.346	0	0.2907	0.178	0.403	0.057	5.074	0	1.127	1.02	1.234	0.054	20.715	0	-0.1583
Pityriasis	dermatologic	1.3519	0.023	2.68	0.678	1.995	3.86476	1.02327	14.5851	10	6521	10	8343	0.0460889	0.139747	not_significant	0.587123	1.3364	1.4359	1.237	1.634	0.101	14.171	0	-0.0499	-0.055	-0.045	0.002	-20.587	0	0.4429	0.306	0.58	0.07	6.349	0	0.2913	0.179	0.404	0.057	5.085	0	1.1266	1.02	1.233	0.054	20.707	0	-0.1539
Pleurisy; pleural effusion	respiratory	0.8418	0.393	1.291	0.229	3.674	2.32054	1.48142	3.63642	51	6480	39	8314	0.000238724	0.00300565	mi_significant	0.365589	3.6221	1.4398	1.241	1.638	0.101	14.208	0	-0.0501	-0.055	-0.045	0.002	-20.666	0	0.4443	0.308	0.581	0.07	6.366	0	0.29	0.178	0.402	0.057	5.061	0	1.1289	1.022	1.236	0.054	20.743	0	-0.1535
Plica syndrome	musculoskeletal	0.1648	-1.681	2.01	0.942	0.175	1.17916	0.186188	7.46332	10	6521	10	8343	0.861052	0.922456	not_significant	0.0715717	0.0649709	1.4329	1.234	1.631	0.101	14.144	0	-0.0498	-0.055	-0.045	0.002	-20.553	0	0.4429	0.306	0.58	0.07	6.348	0	0.2903	0.178	0.403	0.057	5.069	0	1.126	1.019	1.233	0.054	20.699	0	-0.1532
Pneumococcal pneumonia	respiratory	0.1704	-1.019	1.36	0.607	0.281	1.18578	0.360956	3.89619	10	6521	10	8343	0.778782	0.87324	not_significant	0.0740038	0.108584	1.4332	1.235	1.632	0.101	14.148	0	-0.0498	-0.055	-0.045	0.002	-20.555	0	0.4428	0.306	0.58	0.07	6.348	0	0.2905	0.178	0.403	0.057	5.072	0	1.1261	1.019	1.233	0.054	20.701	0	-0.1532
Pneumonia	respiratory	0.6324	0.297	0.967	0.171	3.698	1.88212	1.34582	2.63004	85	6446	72	8281	0.000217223	0.00278804	mi_significant	0.274648	3.66309	1.4362	1.238	1.635	0.101	14.178	0	-0.0501	-0.055	-0.045	0.002	-20.651	0	0.4479	0.311	0.585	0.07	6.417	0	0.2863	0.174	0.399	0.057	4.997	0	1.1281	1.021	1.235	0.054	20.73	0	-0.1542
Pneumonia due to fungus (mycoses)	respiratory	2.1742	-0.022	4.371	1.121	1.94	8.79515	0.97824	79.1227	10	6521	10	8343	0.0523878	0.150886	not_significant	0.944243	1.28077	1.434	1.235	1.633	0.101	14.149	0	-0.0499	-0.055	-0.045	0.002	-20.553	0	0.4427	0.306	0.579	0.07	6.347	0	0.2896	0.177	0.402	0.057	5.057	0	1.1243	1.018	1.231	0.054	20.67	0	-0.1546
Pneumonitis due to inhalation of food or vomitus	respiratory	1.9177	0.905	2.93	0.516	3.713	6.80529	2.47193	18.7276	17	6514	10	8343	0.000204623	0.00265207	mi_significant	0.832847	3.68905	1.4488	1.25	1.648	0.101	14.275	0	-0.0503	-0.055	-0.046	0.002	-20.693	0	0.4437	0.307	0.581	0.07	6.358	0	0.2918	0.179	0.404	0.057	5.092	0	1.1255	1.019	1.232	0.054	20.681	0	-0.1547
Poisoning by analgesics, antipyretics, and antirheumatics	injuries & poisonings	0.6014	0.069	1.134	0.272	2.214	1.82467	1.07144	3.10806	32	6499	28	8325	0.0268377	0.0980097	not_significant	0.261185	1.57125	1.4394	1.241	1.638	0.101	14.198	0	-0.05	-0.055	-0.045	0.002	-20.606	0	0.4418	0.305	0.579	0.07	6.332	0	0.2875	0.175	0.4	0.057	5.019	0	1.1245	1.018	1.231	0.054	20.671	0	-0.1553
Poisoning by antibiotics	injuries & poisonings	-0.2508	-1.873	1.372	0.828	-0.303	0.778178	0.153662	3.94323	10	6521	10	8343	0.761903	0.861621	not_significant	-0.108921	0.118101	1.433	1.234	1.631	0.101	14.146	0	-0.0498	-0.055	-0.045	0.002	-20.552	0	0.4428	0.306	0.58	0.07	6.348	0	0.2901	0.178	0.402	0.057	5.066	0	1.1259	1.019	1.233	0.054	20.701	0	-0.1534
Poisoning by hormones and synthetic substitutes	injuries & poisonings	1.0755	-0.636	2.787	0.873	1.232	2.93146	0.529406	16.2322	10	6521	10	8343	0.218095	0.405365	not_significant	0.467084	0.661354	1.4313	1.233	1.63	0.101	14.127	0	-0.0498	-0.055	-0.045	0.002	-20.541	0	0.4435	0.307	0.58	0.07	6.358	0	0.2906	0.178	0.403	0.057	5.075	0	1.1262	1.02	1.233	0.054	20.704	0	-0.1531
Poisoning by other anti-infectives	injuries & poisonings	2.1849	0.859	3.51	0.676	3.231	8.88976	2.3608	33.4483	14	6517	10	8343	0.00123425	0.0103271	mi_significant	0.94889	2.9086	1.4391	1.24	1.638	0.101	14.194	0	-0.05	-0.055	-0.045	0.002	-20.597	0	0.4399	0.303	0.577	0.07	6.304	0	0.287	0.175	0.399	0.057	5.009	0	1.1254	1.019	1.232	0.054	20.686	0	-0.1562
Poisoning by primarily systemic agents	injuries & poisonings	1.7295	-0.534	3.993	1.155	1.498	5.63783	0.586255	54.2173	10	6521	10	8343	0.134225	0.293784	not_significant	0.751112	0.872167	1.4353	1.237	1.634	0.101	14.163	0	-0.0499	-0.055	-0.045	0.002	-20.58	0	0.444	0.307	0.581	0.07	6.364	0	0.2915	0.179	0.404	0.057	5.088	0	1.1259	1.019	1.232	0.054	20.696	0	-0.152
Poisoning/allergy of sulfonamides	injuries & poisonings	0.263	-0.274	0.8	0.274	0.959	1.30083	0.760332	2.22554	27	6504	33	8320	0.337375	0.54259	not_significant	0.114219	0.471887	1.4342	1.236	1.633	0.101	14.157	0	-0.0499	-0.055	-0.045	0.002	-20.564	0	0.4421	0.305	0.579	0.07	6.338	0	0.2885	0.176	0.401	0.057	5.036	0	1.1255	1.019	1.232	0.054	20.691	0	-0.1548
Polycythemia vera	neoplasms	0.1298	-0.707	0.966	0.427	0.304	1.1386	0.493121	2.62741	11	6520	14	8339	0.761075	0.861621	not_significant	0.0563714	0.118572	1.4336	1.235	1.632	0.101	14.149	0	-0.0499	-0.055	-0.045	0.002	-20.553	0	0.4422	0.305	0.579	0.07	6.337	0	0.2897	0.177	0.402	0.057	5.057	0	1.1259	1.019	1.232	0.054	20.7	0	-0.1533
Polycythemia, secondary	hematopoietic	0.4341	-0.083	0.951	0.264	1.646	1.54357	0.920351	2.5883	31	6500	33	8320	0.0997401	0.23597	not_significant	0.188527	1.00113	1.437	1.238	1.636	0.101	14.178	0	-0.05	-0.055	-0.045	0.002	-20.586	0	0.4397	0.303	0.577	0.07	6.301	0	0.2873	0.175	0.4	0.057	5.015	0	1.1258	1.019	1.232	0.054	20.696	0	-0.1547
Polydipsia	endocrine/metabolic	0.4838	-0.781	1.748	0.645	0.75	1.62223	0.457948	5.7431	10	6521	10	8343	0.453369	0.653841	not_significant	0.210112	0.343548	1.4321	1.234	1.631	0.101	14.136	0	-0.0498	-0.055	-0.045	0.002	-20.548	0	0.4429	0.306	0.58	0.07	6.349	0	0.2906	0.178	0.403	0.057	5.074	0	1.1264	1.02	1.233	0.054	20.707	0	-0.1533
Polyneuropathy due to drugs	mental disorders	0.5065	-0.447	1.46	0.487	1.041	1.65947	0.639544	4.30596	10	6521	10	8343	0.297823	0.500918	not_significant	0.21997	0.526042	1.4359	1.237	1.635	0.101	14.168	0	-0.0499	-0.055	-0.045	0.002	-20.573	0	0.4429	0.306	0.58	0.07	6.348	0	0.29	0.178	0.402	0.057	5.064	0	1.1254	1.019	1.232	0.054	20.691	0	-0.1537
Portal hypertension	digestive	1.1917	0.251	2.132	0.48	2.483	3.29267	1.28531	8.43171	14	6517	10	8343	0.0130124	0.0579207	not_significant	0.517549	1.88564	1.4377	1.239	1.636	0.101	14.184	0	-0.05	-0.055	-0.045	0.002	-20.602	0	0.4382	0.301	0.575	0.07	6.278	0	0.2889	0.177	0.401	0.057	5.042	0	1.1267	1.02	1.233	0.054	20.711	0	-0.1526
Postinflammatory pulmonary fibrosis	respiratory	1.3275	0.265	2.39	0.542	2.448	3.7716	1.30343	10.9135	11	6520	10	8343	0.0143613	0.0618426	not_significant	0.576526	1.84281	1.4444	1.246	1.643	0.101	14.239	0	-0.0501	-0.055	-0.045	0.002	-20.644	0	0.4407	0.304	0.577	0.07	6.315	0	0.2886	0.176	0.401	0.057	5.038	0	1.1254	1.019	1.232	0.054	20.686	0	-0.1532
Postlaminectomy syndrome	musculoskeletal	-0.608	-1.745	0.529	0.58	-1.048	0.544439	0.174645	1.69723	10	6521	14	8339	0.294627	0.497442	not_significant	-0.264051	0.530727	1.431	1.232	1.63	0.101	14.121	0	-0.0498	-0.055	-0.045	0.002	-20.522	0	0.4445	0.308	0.581	0.07	6.37	0	0.2908	0.179	0.403	0.057	5.079	0	1.1259	1.019	1.232	0.054	20.7	0	-0.1525
Postnasal drip	respiratory	0.4263	0.154	0.699	0.139	3.064	1.53158	1.16649	2.01174	107	6424	121	8232	0.00218443	0.0158671	mi_significant	0.18514	2.66066	1.4357	1.237	1.634	0.101	14.165	0	-0.05	-0.055	-0.045	0.002	-20.605	0	0.4422	0.305	0.579	0.07	6.337	0	0.2882	0.176	0.4	0.057	5.031	0	1.1275	1.021	1.234	0.054	20.724	0	-0.1613
Postoperative infection	infectious diseases	0.131	-1.05	1.312	0.603	0.217	1.13997	0.349938	3.71359	10	6521	10	8343	0.827891	0.906019	not_significant	0.0568926	0.0820271	1.433	1.234	1.632	0.101	14.146	0	-0.0498	-0.055	-0.045	0.002	-20.553	0	0.4427	0.306	0.579	0.07	6.347	0	0.2903	0.178	0.403	0.057	5.069	0	1.1257	1.019	1.232	0.054	20.697	0	-0.1534
Postphlebitic syndrome	circulatory system	0.8939	-0.92	2.707	0.925	0.966	2.44465	0.398519	14.9843	10	6521	10	8343	0.333971	0.540404	not_significant	0.388216	0.476291	1.4332	1.235	1.632	0.101	14.148	0	-0.0498	-0.055	-0.045	0.002	-20.554	0	0.4427	0.306	0.579	0.07	6.346	0	0.2892	0.177	0.401	0.057	5.048	0	1.1258	1.019	1.232	0.054	20.699	0	-0.1538
Postprocedural fever	symptoms	-0.2636	-2.027	1.5	0.9	-0.293	0.768281	0.13173	4.48169	10	6521	10	8343	0.769607	0.867256	not_significant	-0.11448	0.113731	1.4328	1.234	1.631	0.101	14.144	0	-0.0498	-0.055	-0.045	0.002	-20.549	0	0.4428	0.306	0.58	0.07	6.347	0	0.2902	0.178	0.402	0.057	5.068	0	1.1258	1.019	1.232	0.054	20.699	0	-0.1534
Posttraumatic stress disorder	mental disorders	0.8545	0.219	1.49	0.324	2.635	2.3502	1.24483	4.4371	27	6504	17	8336	0.00842443	0.0417119	mi_significant	0.371105	2.07446	1.431	1.232	1.63	0.101	14.121	0	-0.0499	-0.055	-0.045	0.002	-20.575	0	0.4452	0.308	0.582	0.07	6.379	0	0.2921	0.18	0.404	0.057	5.098	0	1.1295	1.023	1.236	0.054	20.751	0	-0.1498
Posttraumatic wound infection not elsewhere classified		0.4465	-0.803	1.696	0.637	0.7	1.56283	0.447983	5.4521	10	6521	10	8343	0.483644	0.678025	not_significant	0.193912	0.315474	1.433	1.234	1.632	0.101	14.146	0	-0.0498	-0.055	-0.045	0.002	-20.556	0	0.4433	0.307	0.58	0.07	6.353	0	0.2906	0.178	0.403	0.057	5.074	0	1.1262	1.02	1.233	0.054	20.705	0	-0.1534
potential health hazards related to communicable diseases potential health hazards related to communicable diseases		0.2797	0.187	0.372	0.047	5.91	1.32273	1.20563	1.45063	1101	5430	1283	7070	3.41635e-09	6.11564e-07	mi_significant	0.121472	8.46644	1.4155	1.217	1.615	0.102	13.941	0	-0.0507	-0.056	-0.046	0.002	-20.828	0	0.4661	0.329	0.603	0.07	6.663	0	0.3102	0.198	0.423	0.057	5.401	0	1.143	1.036	1.25	0.055	20.952	0	-0.1565
Precordial pain	circulatory system	0.0236	-0.532	0.579	0.283	0.083	1.02388	0.587429	1.78425	22	6509	35	8318	0.933481	0.970175	not_significant	0.0102493	0.0298945	1.4329	1.234	1.631	0.101	14.145	0	-0.0498	-0.055	-0.045	0.002	-20.553	0	0.4428	0.306	0.58	0.07	6.347	0	0.2902	0.178	0.402	0.057	5.068	0	1.1259	1.019	1.232	0.054	20.699	0	-0.1535
Preeclampsia and eclampsia	pregnancy complications	1.3596	-1.457	4.176	1.437	0.946	3.89464	0.232934	65.1049	10	6521	10	8343	0.34409	0.549974	not_significant	0.590467	0.463328	1.4343	1.236	1.633	0.101	14.156	0	-0.0499	-0.055	-0.045	0.002	-20.568	0	0.4437	0.307	0.58	0.07	6.36	0	0.2912	0.179	0.403	0.057	5.084	0	1.1269	1.02	1.234	0.054	20.713	0	-0.1523
Premature beats	circulatory system	0.3263	-0.093	0.746	0.214	1.524	1.38583	0.911194	2.10855	41	6490	58	8295	0.127521	0.284289	not_significant	0.14171	0.894417	1.4354	1.237	1.634	0.101	14.169	0	-0.05	-0.055	-0.045	0.002	-20.602	0	0.4456	0.309	0.582	0.07	6.384	0	0.2923	0.18	0.405	0.057	5.102	0	1.1295	1.023	1.236	0.054	20.742	0	-0.1512
Presbyopia	sense organs	0.2692	-0.046	0.585	0.161	1.672	1.30892	0.955042	1.79499	73	6458	103	8250	0.0946006	0.228633	not_significant	0.116912	1.02411	1.4419	1.243	1.641	0.101	14.21	0	-0.0502	-0.055	-0.045	0.002	-20.611	0	0.4446	0.308	0.581	0.07	6.372	0	0.292	0.18	0.404	0.057	5.098	0	1.1288	1.022	1.235	0.054	20.739	0	-0.1508
Primary angle-closure glaucoma	sense organs	0.0899	-1.328	1.508	0.724	0.124	1.09406	0.265007	4.51769	10	6521	10	8343	0.901118	0.948469	not_significant	0.0390431	0.0452186	1.4333	1.235	1.632	0.101	14.144	0	-0.0498	-0.055	-0.045	0.002	-20.547	0	0.4427	0.306	0.579	0.07	6.345	0	0.2901	0.178	0.402	0.057	5.066	0	1.1258	1.019	1.232	0.054	20.699	0	-0.1534
Primary hypercoagulable state	hematopoietic	0.763	-0.349	1.875	0.567	1.345	2.1447	0.705393	6.52082	10	6521	10	8343	0.178606	0.357212	not_significant	0.331367	0.748104	1.4328	1.234	1.631	0.101	14.145	0	-0.0499	-0.055	-0.045	0.002	-20.561	0	0.4437	0.307	0.58	0.07	6.359	0	0.2899	0.178	0.402	0.057	5.062	0	1.1264	1.02	1.233	0.054	20.707	0	-0.1532
Primary open angle glaucoma	sense organs	1.1484	-0.162	2.458	0.668	1.718	3.15314	0.850441	11.6814	10	6521	10	8343	0.0857439	0.216323	not_significant	0.498744	1.0668	1.437	1.238	1.636	0.101	14.18	0	-0.0499	-0.055	-0.045	0.002	-20.589	0	0.4424	0.306	0.579	0.07	6.341	0	0.289	0.177	0.401	0.057	5.046	0	1.1262	1.02	1.233	0.054	20.704	0	-0.1536
Primary pulmonary hypertension	circulatory system	0.3574	-1.796	2.511	1.099	0.325	1.42961	0.165961	12.3172	10	6521	10	8343	0.744927	0.851352	not_significant	0.155217	0.127886	1.4329	1.234	1.631	0.101	14.145	0	-0.0498	-0.055	-0.045	0.002	-20.551	0	0.4427	0.306	0.579	0.07	6.346	0	0.2902	0.178	0.402	0.057	5.068	0	1.1258	1.019	1.232	0.054	20.698	0	-0.1536
Primary thrombocytopenia	hematopoietic	0.5122	-1.156	2.18	0.851	0.602	1.66896	0.314743	8.84631	10	6521	10	8343	0.547311	0.721891	not_significant	0.222446	0.261766	1.4334	1.235	1.632	0.101	14.149	0	-0.0498	-0.055	-0.045	0.002	-20.558	0	0.4425	0.306	0.579	0.07	6.343	0	0.2903	0.178	0.403	0.057	5.069	0	1.1259	1.019	1.233	0.054	20.7	0	-0.1534
Primary/intrinsic cardiomyopathies	circulatory system	0.7276	-0.086	1.541	0.415	1.753	2.07011	0.917594	4.66926	14	6517	13	8340	0.0795438	0.202806	not_significant	0.315993	1.09939	1.4392	1.24	1.638	0.101	14.194	0	-0.05	-0.055	-0.045	0.002	-20.599	0	0.4419	0.305	0.579	0.07	6.334	0	0.2894	0.177	0.402	0.057	5.053	0	1.1257	1.019	1.232	0.054	20.694	0	-0.1541
Progressive myopia	sense organs	-1.1645	-3.41	1.081	1.146	-1.016	0.312079	0.0330412	2.94763	10	6521	10	8343	0.30953	0.512138	not_significant	-0.505736	0.509297	1.4335	1.235	1.632	0.101	14.151	0	-0.0498	-0.055	-0.045	0.002	-20.554	0	0.4424	0.306	0.579	0.07	6.341	0	0.2902	0.178	0.402	0.057	5.068	0	1.1258	1.019	1.232	0.054	20.699	0	-0.1534
Prostatitis	genitourinary	0.676	0.114	1.238	0.287	2.356	1.966	1.12075	3.44871	30	6501	24	8329	0.0184939	0.0747674	not_significant	0.293583	1.73297	1.4378	1.239	1.636	0.101	14.187	0	-0.05	-0.055	-0.045	0.002	-20.597	0	0.4415	0.305	0.578	0.07	6.328	0	0.2877	0.175	0.4	0.057	5.023	0	1.1244	1.018	1.231	0.054	20.67	0	-0.1562
Protein-calorie malnutrition	endocrine/metabolic	0.7872	0.003	1.571	0.4	1.968	2.19724	1.003	4.81146	16	6515	14	8339	0.0490331	0.144896	not_significant	0.341877	1.30951	1.4369	1.238	1.635	0.101	14.183	0	-0.05	-0.055	-0.045	0.002	-20.602	0	0.4423	0.306	0.579	0.07	6.339	0	0.2884	0.176	0.401	0.057	5.035	0	1.1264	1.02	1.233	0.054	20.709	0	-0.1537
Proteinuria	endocrine/metabolic	0.9658	0.571	1.361	0.202	4.791	2.62689	1.77004	3.90009	67	6464	46	8307	1.65972e-06	7.31385e-05	mi_significant	0.419442	5.77996	1.4483	1.249	1.647	0.101	14.273	0	-0.0505	-0.055	-0.046	0.002	-20.764	0	0.445	0.308	0.582	0.07	6.373	0	0.2945	0.182	0.407	0.057	5.138	0	1.1321	1.025	1.239	0.054	20.79	0	-0.1498
Protozoan infection	infectious diseases	0.4164	-1.618	2.451	1.038	0.401	1.51649	0.198295	11.5999	10	6521	10	8343	0.68824	0.812369	not_significant	0.18084	0.16226	1.4328	1.234	1.631	0.101	14.144	0	-0.0498	-0.055	-0.045	0.002	-20.552	0	0.4429	0.306	0.58	0.07	6.348	0	0.29	0.178	0.402	0.057	5.064	0	1.126	1.019	1.233	0.054	20.702	0	-0.1533
Prurigo and Lichen	dermatologic	0.4819	0.054	0.91	0.218	2.207	1.61915	1.05548	2.48432	45	6486	49	8304	0.0273116	0.0989204	not_significant	0.209287	1.56365	1.4392	1.241	1.638	0.101	14.199	0	-0.0501	-0.055	-0.045	0.002	-20.632	0	0.4462	0.309	0.583	0.07	6.394	0	0.2931	0.181	0.405	0.057	5.115	0	1.1274	1.021	1.234	0.054	20.723	0	-0.1525
Pruritus and related conditions	dermatologic	0.5205	0.235	0.806	0.145	3.578	1.68287	1.26491	2.23893	107	6424	105	8248	0.000346511	0.00394904	mi_significant	0.22605	3.46028	1.4404	1.242	1.639	0.101	14.212	0	-0.0502	-0.055	-0.045	0.002	-20.671	0	0.4444	0.308	0.581	0.07	6.367	0	0.2906	0.178	0.403	0.057	5.072	0	1.1272	1.021	1.234	0.054	20.716	0	-0.1575
Pseudomonal pneumonia	respiratory	1.5694	-0.832	3.971	1.225	1.281	4.80377	0.435178	53.0375	10	6521	10	8343	0.200284	0.387666	not_significant	0.681582	0.698353	1.4333	1.235	1.632	0.101	14.146	0	-0.0499	-0.055	-0.045	0.002	-20.556	0	0.4426	0.306	0.579	0.07	6.344	0	0.2897	0.177	0.402	0.057	5.058	0	1.1265	1.02	1.233	0.054	20.709	0	-0.1528
Psoriasis	dermatologic	-1.2916	-3.495	0.912	1.124	-1.149	0.274831	0.0303487	2.4893	10	6521	10	8343	0.250564	0.442034	not_significant	-0.560935	0.601082	1.4319	1.233	1.63	0.101	14.135	0	-0.0498	-0.055	-0.045	0.002	-20.534	0	0.4421	0.305	0.579	0.07	6.337	0	0.29	0.178	0.402	0.057	5.064	0	1.126	1.019	1.233	0.054	20.699	0	-0.1539
Psoriasis vulgaris	dermatologic	0.4409	0.022	0.859	0.214	2.064	1.55411	1.02224	2.3608	49	6482	49	8304	0.0390139	0.125185	not_significant	0.19148	1.40878	1.4347	1.236	1.633	0.101	14.16	0	-0.05	-0.055	-0.045	0.002	-20.594	0	0.4443	0.308	0.581	0.07	6.368	0	0.2913	0.179	0.404	0.057	5.086	0	1.1264	1.02	1.233	0.054	20.707	0	-0.1536
Psoriatic arthropathy	dermatologic	0.5596	-0.645	1.764	0.614	0.911	1.74997	0.524663	5.83573	10	6521	10	8343	0.362381	0.568289	not_significant	0.243031	0.440835	1.4341	1.236	1.633	0.101	14.156	0	-0.0499	-0.055	-0.045	0.002	-20.565	0	0.4432	0.306	0.58	0.07	6.353	0	0.2903	0.178	0.403	0.057	5.069	0	1.1259	1.019	1.233	0.054	20.699	0	-0.1534
Psychogenic disorder	mental disorders	0.36	-0.284	1.004	0.328	1.096	1.43333	0.752767	2.72918	19	6512	21	8332	0.273017	0.469347	not_significant	0.156346	0.563811	1.4341	1.236	1.633	0.101	14.155	0	-0.0499	-0.055	-0.045	0.002	-20.566	0	0.4429	0.306	0.58	0.07	6.349	0	0.2896	0.177	0.402	0.057	5.057	0	1.1259	1.019	1.232	0.054	20.699	0	-0.1539
Psychosis	mental disorders	1.1487	0.091	2.207	0.54	2.128	3.15409	1.09527	9.08841	11	6520	10	8343	0.0333234	0.112096	not_significant	0.498874	1.47725	1.4314	1.233	1.63	0.101	14.128	0	-0.0498	-0.055	-0.045	0.002	-20.557	0	0.4448	0.308	0.582	0.07	6.374	0	0.2922	0.18	0.405	0.057	5.102	0	1.1271	1.02	1.234	0.054	20.717	0	-0.1536
Ptosis of eyelid	sense organs	-0.1802	-1.015	0.655	0.426	-0.423	0.835103	0.362402	1.92514	10	6521	19	8334	0.67226	0.79883	not_significant	-0.0782599	0.172463	1.4324	1.234	1.631	0.101	14.139	0	-0.0498	-0.055	-0.045	0.002	-20.542	0	0.443	0.306	0.58	0.07	6.35	0	0.2905	0.178	0.403	0.057	5.073	0	1.1258	1.019	1.232	0.054	20.698	0	-0.1531
Pulmonary collapse; interstitial and compensatory emphysema	respiratory	1.2105	0.792	1.629	0.214	5.669	3.35516	2.20781	5.09877	65	6466	42	8311	1.43578e-08	1.35579e-06	mi_significant	0.525713	7.84291	1.4589	1.26	1.658	0.101	14.376	0	-0.0507	-0.055	-0.046	0.002	-20.862	0	0.4421	0.305	0.579	0.07	6.328	0	0.2944	0.182	0.407	0.057	5.135	0	1.1324	1.026	1.239	0.054	20.793	0	-0.1557
Pulmonary congestion and hypostasis	respiratory	1.7712	0.674	2.869	0.56	3.163	5.8779	1.96207	17.6194	13	6518	10	8343	0.00155935	0.0122706	mi_significant	0.769222	2.80706	1.4445	1.246	1.643	0.101	14.242	0	-0.0502	-0.055	-0.045	0.002	-20.655	0	0.4408	0.304	0.578	0.07	6.316	0	0.2894	0.177	0.402	0.057	5.051	0	1.1265	1.02	1.233	0.054	20.704	0	-0.1538
Pulmonary embolism and infarction, acute	circulatory system	0.6509	-0.125	1.427	0.396	1.643	1.91727	0.882497	4.16618	15	6516	15	8338	0.100292	0.236761	not_significant	0.282682	0.998733	1.4372	1.239	1.636	0.101	14.183	0	-0.05	-0.055	-0.045	0.002	-20.599	0	0.4435	0.307	0.58	0.07	6.357	0	0.2903	0.178	0.403	0.057	5.068	0	1.1265	1.02	1.233	0.054	20.708	0	-0.153
Pulmonary heart disease	circulatory system	0.8966	0.233	1.56	0.338	2.65	2.45125	1.26238	4.75882	23	6508	18	8335	0.00805792	0.0409714	mi_significant	0.389388	2.09378	1.4384	1.24	1.637	0.101	14.198	0	-0.0501	-0.055	-0.045	0.002	-20.638	0	0.4447	0.308	0.582	0.07	6.374	0	0.2922	0.18	0.405	0.057	5.101	0	1.1285	1.022	1.235	0.054	20.736	0	-0.1516
Purpura and other hemorrhagic conditions	hematopoietic	0.5653	-0.269	1.399	0.425	1.329	1.75998	0.764143	4.05115	11	6520	14	8339	0.183925	0.362909	not_significant	0.245507	0.735359	1.4366	1.238	1.635	0.101	14.177	0	-0.05	-0.055	-0.045	0.002	-20.591	0	0.4442	0.307	0.581	0.07	6.367	0	0.2915	0.179	0.404	0.057	5.089	0	1.1271	1.02	1.234	0.054	20.717	0	-0.1525
Pyelonephritis	genitourinary	1.1909	0.424	1.958	0.391	3.042	3.29004	1.52806	7.08514	20	6511	11	8342	0.0023466	0.0166785	mi_significant	0.517201	2.62956	1.4392	1.241	1.638	0.101	14.197	0	-0.0501	-0.055	-0.045	0.002	-20.633	0	0.4449	0.308	0.582	0.07	6.374	0	0.2899	0.178	0.402	0.057	5.061	0	1.1284	1.022	1.235	0.054	20.735	0	-0.1513
Pyoderma	dermatologic	-0.0295	-1.675	1.616	0.84	-0.035	0.970931	0.187308	5.03292	10	6521	10	8343	0.971968	0.988957	not_significant	-0.0128117	0.0123479	1.433	1.234	1.632	0.101	14.146	0	-0.0498	-0.055	-0.045	0.002	-20.552	0	0.4427	0.306	0.579	0.07	6.346	0	0.2902	0.178	0.402	0.057	5.067	0	1.1258	1.019	1.232	0.054	20.699	0	-0.1534
Pyogenic arthritis	musculoskeletal	0.1882	-1.246	1.622	0.731	0.257	1.20707	0.287653	5.06321	10	6521	10	8343	0.797007	0.883689	not_significant	0.0817342	0.0985378	1.4328	1.234	1.631	0.101	14.143	0	-0.0498	-0.055	-0.045	0.002	-20.551	0	0.4425	0.306	0.579	0.07	6.343	0	0.2901	0.178	0.402	0.057	5.066	0	1.1259	1.019	1.232	0.054	20.7	0	-0.1534
Pyogenic granuloma	dermatologic	0.7756	-0.439	1.99	0.62	1.251	2.17189	0.644681	7.31553	10	6521	10	8343	0.21076	0.398269	not_significant	0.336839	0.676212	1.4325	1.234	1.631	0.101	14.141	0	-0.0499	-0.055	-0.045	0.002	-20.56	0	0.4422	0.305	0.579	0.07	6.337	0	0.2908	0.179	0.403	0.057	5.077	0	1.1269	1.02	1.234	0.054	20.715	0	-0.1524
Radiotherapy		1.8224	0.205	3.44	0.825	2.208	6.18669	1.22753	31.187	10	6521	10	8343	0.0272231	0.0988706	not_significant	0.791458	1.56506	1.4365	1.238	1.635	0.101	14.173	0	-0.0499	-0.055	-0.045	0.002	-20.584	0	0.4425	0.306	0.579	0.07	6.341	0	0.2889	0.177	0.401	0.057	5.043	0	1.1267	1.02	1.233	0.054	20.713	0	-0.1537
Rash and other nonspecific skin eruption	dermatologic	0.2939	0.109	0.479	0.094	3.119	1.34165	1.11516	1.61446	241	6290	274	8079	0.00181434	0.0136281	mi_significant	0.127639	2.74128	1.4295	1.231	1.628	0.101	14.107	0	-0.0501	-0.055	-0.045	0.002	-20.632	0	0.4505	0.314	0.587	0.07	6.451	0	0.2956	0.183	0.408	0.057	5.158	0	1.1307	1.024	1.237	0.054	20.77	0	-0.1536
Raynaud's syndrome	circulatory system	-0.4985	-1.301	0.304	0.409	-1.218	0.607441	0.272259	1.35527	10	6521	21	8332	0.223349	0.410093	not_significant	-0.216496	0.651016	1.4342	1.236	1.633	0.101	14.158	0	-0.0498	-0.055	-0.045	0.002	-20.555	0	0.4425	0.306	0.579	0.07	6.342	0	0.2905	0.178	0.403	0.057	5.072	0	1.1253	1.019	1.232	0.054	20.687	0	-0.1533
Redundant prepuce and phimosis/BXO	genitourinary	0.2428	-0.711	1.197	0.487	0.499	1.27481	0.491153	3.31017	10	6521	10	8343	0.617934	0.770668	not_significant	0.105447	0.209058	1.4326	1.234	1.631	0.101	14.141	0	-0.0498	-0.055	-0.045	0.002	-20.553	0	0.4427	0.306	0.579	0.07	6.345	0	0.2905	0.178	0.403	0.057	5.072	0	1.1259	1.019	1.233	0.054	20.7	0	-0.1531
Reflux esophagitis	digestive	1.0816	0.256	1.907	0.421	2.569	2.94939	1.29175	6.73286	18	6513	10	8343	0.0102064	0.0481887	mi_significant	0.469733	1.99113	1.4307	1.232	1.629	0.101	14.12	0	-0.0499	-0.055	-0.045	0.002	-20.559	0	0.4429	0.306	0.58	0.07	6.346	0	0.2912	0.179	0.403	0.057	5.083	0	1.1285	1.022	1.235	0.054	20.74	0	-0.1513
Regional enteritis	digestive	0.3864	-0.437	1.209	0.42	0.92	1.47167	0.645971	3.35013	14	6517	11	8342	0.357583	0.562768	not_significant	0.167811	0.446623	1.4317	1.233	1.63	0.101	14.132	0	-0.0498	-0.055	-0.045	0.002	-20.546	0	0.4429	0.306	0.58	0.07	6.348	0	0.2906	0.178	0.403	0.057	5.075	0	1.1257	1.019	1.232	0.054	20.696	0	-0.1533
Reiter's disease	musculoskeletal	0.0474	-2.443	2.538	1.271	0.037	1.04854	0.0868998	12.6543	10	6521	10	8343	0.970248	0.988188	not_significant	0.0205856	0.013117	1.433	1.234	1.632	0.101	14.146	0	-0.0498	-0.055	-0.045	0.002	-20.552	0	0.4427	0.306	0.579	0.07	6.346	0	0.2902	0.178	0.402	0.057	5.067	0	1.1258	1.019	1.232	0.054	20.699	0	-0.1534
Renal colic	genitourinary	-0.3578	-1.21	0.494	0.435	-0.823	0.699213	0.298197	1.63886	10	6521	19	8334	0.410231	0.6198	not_significant	-0.155391	0.386972	1.4335	1.235	1.632	0.101	14.15	0	-0.0498	-0.055	-0.045	0.002	-20.551	0	0.4423	0.306	0.579	0.07	6.34	0	0.2903	0.178	0.403	0.057	5.07	0	1.1252	1.019	1.232	0.054	20.687	0	-0.1532
Renal dialysis	genitourinary	2.7687	1.262	4.275	0.769	3.601	15.9379	3.53248	71.8801	20	6511	10	8343	0.000316631	0.00370431	mi_significant	1.20243	3.49945	1.4416	1.243	1.64	0.101	14.209	0	-0.0501	-0.055	-0.045	0.002	-20.635	0	0.4429	0.306	0.58	0.07	6.344	0	0.2902	0.178	0.402	0.057	5.063	0	1.1253	1.019	1.232	0.054	20.677	0	-0.1523
Renal failure NOS	genitourinary	1.6638	0.312	3.016	0.69	2.412	5.27933	1.36615	20.4095	10	6521	10	8343	0.0158441	0.0662846	not_significant	0.722579	1.80013	1.4383	1.24	1.637	0.101	14.188	0	-0.05	-0.055	-0.045	0.002	-20.597	0	0.4425	0.306	0.579	0.07	6.341	0	0.2897	0.177	0.402	0.057	5.057	0	1.1259	1.019	1.233	0.054	20.698	0	-0.1543
Renal osteodystrophy	genitourinary	2.5831	0.37	4.796	1.129	2.288	13.2381	1.44773	121.025	10	6521	10	8343	0.0221523	0.0848849	not_significant	1.12183	1.65458	1.4387	1.24	1.637	0.101	14.189	0	-0.05	-0.055	-0.045	0.002	-20.599	0	0.4436	0.307	0.58	0.07	6.357	0	0.2885	0.176	0.401	0.057	5.036	0	1.1268	1.02	1.233	0.054	20.712	0	-0.1535
Renal sclerosis, NOS	genitourinary	1.4572	0.238	2.676	0.622	2.343	4.29392	1.26871	14.5269	11	6520	10	8343	0.0191457	0.0762369	not_significant	0.632854	1.71793	1.4335	1.235	1.632	0.101	14.145	0	-0.0499	-0.055	-0.045	0.002	-20.572	0	0.4419	0.305	0.579	0.07	6.332	0	0.2911	0.179	0.403	0.057	5.083	0	1.1272	1.021	1.234	0.054	20.719	0	-0.1523
Respiratory abnormalities	respiratory	-0.799	-2.531	0.933	0.884	-0.904	0.449779	0.0795794	2.54212	10	6521	10	8343	0.365975	0.573245	not_significant	-0.347001	0.436549	1.4339	1.235	1.632	0.101	14.154	0	-0.0498	-0.055	-0.045	0.002	-20.556	0	0.4422	0.305	0.579	0.07	6.338	0	0.2899	0.178	0.402	0.057	5.062	0	1.1255	1.019	1.232	0.054	20.693	0	-0.1534
Respiratory failure	respiratory	1.4699	0.913	2.026	0.284	5.177	4.3488	2.49179	7.58369	47	6484	21	8332	2.25751e-07	1.42115e-05	mi_significant	0.638369	6.64637	1.4496	1.251	1.648	0.101	14.29	0	-0.0504	-0.055	-0.046	0.002	-20.732	0	0.4441	0.307	0.581	0.07	6.362	0	0.2863	0.174	0.399	0.057	4.994	0	1.1266	1.02	1.233	0.054	20.701	0	-0.1581
Respiratory insufficiency	respiratory	1.6317	0.26	3.004	0.7	2.331	5.11256	1.29693	20.166	10	6521	10	8343	0.0197513	0.0781773	not_significant	0.708638	1.7044	1.433	1.234	1.632	0.101	14.141	0	-0.0499	-0.055	-0.045	0.002	-20.556	0	0.4439	0.307	0.581	0.07	6.363	0	0.2904	0.178	0.403	0.057	5.07	0	1.1265	1.02	1.233	0.054	20.708	0	-0.1542
Restless legs syndrome	neurological	0.1908	-0.399	0.781	0.301	0.634	1.21022	0.670991	2.18365	21	6510	29	8324	0.526114	0.708994	not_significant	0.0828634	0.27892	1.4341	1.236	1.633	0.101	14.155	0	-0.0499	-0.055	-0.045	0.002	-20.562	0	0.4425	0.306	0.579	0.07	6.343	0	0.2905	0.178	0.403	0.057	5.072	0	1.1259	1.019	1.232	0.054	20.699	0	-0.1537
Retention of urine	genitourinary	0.4559	0.076	0.835	0.194	2.354	1.57759	1.07896	2.30481	56	6475	65	8288	0.0185543	0.0747828	not_significant	0.197995	1.73156	1.4414	1.243	1.64	0.101	14.216	0	-0.0501	-0.055	-0.045	0.002	-20.638	0	0.4424	0.306	0.579	0.07	6.341	0	0.2905	0.178	0.403	0.057	5.073	0	1.1266	1.02	1.233	0.054	20.709	0	-0.1555
Reticulosarcoma	neoplasms	-1.4033	-3.708	0.902	1.176	-1.193	0.245785	0.0245265	2.46453	10	6521	10	8343	0.232777	0.419928	not_significant	-0.609445	0.633059	1.4332	1.235	1.632	0.101	14.147	0	-0.0498	-0.055	-0.045	0.002	-20.549	0	0.4424	0.306	0.579	0.07	6.341	0	0.2902	0.178	0.402	0.057	5.066	0	1.1263	1.02	1.233	0.054	20.706	0	-0.1535
Retinal detachment with retinal defect	sense organs	0.1767	-1.294	1.647	0.75	0.235	1.19327	0.274172	5.19138	10	6521	10	8343	0.813851	0.894357	not_significant	0.0767398	0.089455	1.4332	1.235	1.632	0.101	14.147	0	-0.0498	-0.055	-0.045	0.002	-20.554	0	0.4426	0.306	0.579	0.07	6.344	0	0.2901	0.178	0.402	0.057	5.065	0	1.1258	1.019	1.232	0.054	20.699	0	-0.1535
Retinal detachments and defects	sense organs	0.4679	-0.366	1.302	0.426	1.1	1.59664	0.693503	3.67664	10	6521	14	8339	0.271461	0.467281	not_significant	0.203206	0.566292	1.4353	1.237	1.634	0.101	14.166	0	-0.0499	-0.055	-0.045	0.002	-20.575	0	0.4423	0.306	0.579	0.07	6.34	0	0.2898	0.178	0.402	0.057	5.059	0	1.1263	1.02	1.233	0.054	20.707	0	-0.1543
Retinal edema	sense organs	-0.6853	-2.555	1.184	0.954	-0.718	0.503939	0.0776922	3.26742	10	6521	10	8343	0.47246	0.670883	not_significant	-0.297622	0.325635	1.4327	1.234	1.631	0.101	14.143	0	-0.0498	-0.055	-0.045	0.002	-20.55	0	0.4427	0.306	0.579	0.07	6.346	0	0.2902	0.178	0.402	0.057	5.068	0	1.1267	1.02	1.233	0.054	20.709	0	-0.1533
Retinal hemorrhage/ischemia	sense organs	1.5258	0.35	2.702	0.6	2.543	4.59882	1.41907	14.9095	10	6521	10	8343	0.0109996	0.0512025	not_significant	0.662647	1.95862	1.4403	1.242	1.639	0.101	14.208	0	-0.0501	-0.055	-0.045	0.002	-20.626	0	0.4428	0.306	0.58	0.07	6.346	0	0.292	0.18	0.404	0.057	5.099	0	1.1269	1.02	1.234	0.054	20.712	0	-0.1532
Retinal vascular changes and abnomalities	sense organs	0.2613	-0.855	1.378	0.57	0.459	1.29862	0.425283	3.96696	10	6521	10	8343	0.646416	0.783879	not_significant	0.113481	0.189488	1.4335	1.235	1.632	0.101	14.15	0	-0.0499	-0.055	-0.045	0.002	-20.557	0	0.4429	0.306	0.58	0.07	6.348	0	0.2904	0.178	0.403	0.057	5.071	0	1.1263	1.02	1.233	0.054	20.704	0	-0.1531
Rhabdomyolysis	symptoms	1.4115	-0.858	3.681	1.158	1.219	4.1021	0.424009	39.6861	10	6521	10	8343	0.222887	0.410093	not_significant	0.613007	0.651916	1.4321	1.234	1.631	0.101	14.136	0	-0.0498	-0.055	-0.045	0.002	-20.542	0	0.4427	0.306	0.579	0.07	6.346	0	0.2891	0.177	0.401	0.057	5.048	0	1.1258	1.019	1.232	0.054	20.699	0	-0.154
Rheumatic disease of the heart valves	circulatory system	1.7354	0.071	3.399	0.849	2.044	5.6712	1.07358	29.9342	10	6521	10	8343	0.0409383	0.130407	not_significant	0.753675	1.38787	1.4348	1.236	1.633	0.101	14.161	0	-0.0499	-0.055	-0.045	0.002	-20.574	0	0.4434	0.307	0.58	0.07	6.356	0	0.2878	0.176	0.4	0.057	5.024	0	1.1266	1.02	1.233	0.054	20.711	0	-0.1533
Rheumatoid arthritis	musculoskeletal	0.6977	-0.336	1.731	0.527	1.323	2.00913	0.714623	5.6463	10	6521	10	8343	0.185783	0.366028	not_significant	0.303007	0.730994	1.4327	1.234	1.631	0.101	14.14	0	-0.0499	-0.055	-0.045	0.002	-20.561	0	0.4438	0.307	0.58	0.07	6.36	0	0.2907	0.178	0.403	0.057	5.075	0	1.1272	1.021	1.234	0.054	20.718	0	-0.1522
Rheumatoid arthritis and other inflammatory polyarthropathies	musculoskeletal	0.8046	0.005	1.605	0.408	1.971	2.2358	1.00501	4.97786	15	6516	12	8341	0.04868	0.144294	not_significant	0.349433	1.31265	1.4345	1.236	1.633	0.101	14.158	0	-0.0499	-0.055	-0.045	0.002	-20.584	0	0.4439	0.307	0.581	0.07	6.362	0	0.2906	0.178	0.403	0.057	5.073	0	1.1276	1.021	1.234	0.054	20.725	0	-0.1525
Rickets or osteomalacia	endocrine/metabolic	1.4315	-0.844	3.707	1.161	1.233	4.18497	0.429987	40.7314	10	6521	10	8343	0.217489	0.405241	not_significant	0.621693	0.662562	1.4332	1.235	1.632	0.101	14.145	0	-0.0499	-0.055	-0.045	0.002	-20.556	0	0.4432	0.307	0.58	0.07	6.353	0	0.2902	0.178	0.402	0.057	5.067	0	1.1259	1.019	1.233	0.054	20.7	0	-0.1532
Right bundle branch block	circulatory system	0.3611	-0.308	1.03	0.341	1.058	1.43491	0.734915	2.80107	17	6514	21	8332	0.290067	0.491936	not_significant	0.156824	0.537502	1.4354	1.237	1.634	0.101	14.166	0	-0.0499	-0.055	-0.045	0.002	-20.576	0	0.4429	0.306	0.58	0.07	6.349	0	0.2901	0.178	0.402	0.057	5.066	0	1.1264	1.02	1.233	0.054	20.708	0	-0.153
Rosacea	dermatologic	-0.4105	-0.866	0.045	0.232	-1.767	0.663319	0.420631	1.04603	31	6500	61	8292	0.0772354	0.199035	not_significant	-0.178278	1.11218	1.4342	1.236	1.633	0.101	14.155	0	-0.0498	-0.055	-0.045	0.002	-20.526	0	0.4403	0.304	0.577	0.07	6.31	0	0.2887	0.176	0.401	0.057	5.041	0	1.1255	1.019	1.232	0.054	20.691	0	-0.1546
Rotator cuff (capsule) sprain		-0.6361	-2.117	0.845	0.756	-0.842	0.529353	0.120392	2.32798	10	6521	10	8343	0.399818	0.60716	not_significant	-0.276255	0.398138	1.4331	1.235	1.632	0.101	14.146	0	-0.0498	-0.055	-0.045	0.002	-20.551	0	0.4425	0.306	0.579	0.07	6.343	0	0.29	0.178	0.402	0.057	5.063	0	1.1266	1.02	1.233	0.054	20.709	0	-0.1534
Rupture of synovium	musculoskeletal	0.6652	-0.078	1.408	0.379	1.755	1.94488	0.924964	4.08777	15	6516	15	8338	0.0792452	0.202692	not_significant	0.288893	1.10103	1.435	1.236	1.634	0.101	14.163	0	-0.0499	-0.055	-0.045	0.002	-20.587	0	0.4437	0.307	0.58	0.07	6.359	0	0.2913	0.179	0.404	0.057	5.086	0	1.128	1.021	1.235	0.054	20.73	0	-0.1524
Rupture of tendon, nontraumatic	musculoskeletal	-0.1496	-0.846	0.546	0.355	-0.421	0.861052	0.429128	1.72633	13	6518	27	8326	0.673634	0.799411	not_significant	-0.0649705	0.171576	1.4317	1.233	1.63	0.101	14.127	0	-0.0498	-0.055	-0.045	0.002	-20.52	0	0.4425	0.306	0.579	0.07	6.343	0	0.2903	0.178	0.403	0.057	5.069	0	1.1258	1.019	1.232	0.054	20.699	0	-0.1533
Sacroiliitis NEC	musculoskeletal	0.3052	-0.438	1.049	0.379	0.805	1.3569	0.645326	2.85479	13	6518	17	8336	0.42099	0.628159	not_significant	0.132547	0.375728	1.4331	1.235	1.632	0.101	14.146	0	-0.0499	-0.055	-0.045	0.002	-20.562	0	0.4439	0.307	0.581	0.07	6.361	0	0.2907	0.178	0.403	0.057	5.076	0	1.1267	1.02	1.233	0.054	20.711	0	-0.153
Sarcoidosis	dermatologic	0.4526	-1.281	2.186	0.885	0.512	1.5724	0.277759	8.89954	10	6521	10	8343	0.608902	0.763003	not_significant	0.196562	0.215452	1.4336	1.235	1.632	0.101	14.15	0	-0.0498	-0.055	-0.045	0.002	-20.556	0	0.4424	0.306	0.579	0.07	6.341	0	0.2902	0.178	0.402	0.057	5.068	0	1.1252	1.019	1.232	0.054	20.683	0	-0.1534
Scar conditions and fibrosis of skin	dermatologic	0.1191	-0.209	0.447	0.167	0.712	1.12648	0.811395	1.56361	70	6461	93	8260	0.476337	0.673922	not_significant	0.0517245	0.322085	1.4352	1.237	1.634	0.101	14.161	0	-0.0499	-0.055	-0.045	0.002	-20.563	0	0.4423	0.306	0.579	0.07	6.341	0	0.2888	0.176	0.401	0.057	5.039	0	1.1255	1.019	1.232	0.054	20.693	0	-0.1537
Schizophrenia	mental disorders	0.629	-1.2	2.458	0.933	0.674	1.87573	0.301194	11.6814	10	6521	10	8343	0.500352	0.694145	not_significant	0.273171	0.300724	1.4319	1.233	1.631	0.101	14.134	0	-0.0498	-0.055	-0.045	0.002	-20.543	0	0.4425	0.306	0.579	0.07	6.343	0	0.2902	0.178	0.402	0.057	5.067	0	1.126	1.019	1.233	0.054	20.702	0	-0.1535
Schmorl's nodes	musculoskeletal	0.9306	-1.501	3.362	1.241	0.75	2.53603	0.222907	28.8468	10	6521	10	8343	0.453215	0.653841	not_significant	0.404154	0.343696	1.4331	1.235	1.632	0.101	14.147	0	-0.0498	-0.055	-0.045	0.002	-20.553	0	0.442	0.305	0.579	0.07	6.335	0	0.2895	0.177	0.402	0.057	5.054	0	1.1258	1.019	1.232	0.054	20.699	0	-0.1534
Sciatica	symptoms	0.162	-0.067	0.391	0.117	1.384	1.17586	0.935195	1.47846	140	6391	192	8161	0.166219	0.340684	not_significant	0.0703557	0.779319	1.4339	1.235	1.632	0.101	14.154	0	-0.05	-0.055	-0.045	0.002	-20.593	0	0.4457	0.309	0.582	0.07	6.385	0	0.2919	0.18	0.404	0.057	5.096	0	1.1293	1.023	1.236	0.054	20.739	0	-0.1513
Scleritis and episcleritis	sense organs	0.3737	-1.223	1.97	0.814	0.459	1.4531	0.294346	7.17068	10	6521	10	8343	0.646349	0.783879	not_significant	0.162296	0.189533	1.434	1.235	1.633	0.101	14.152	0	-0.0499	-0.055	-0.045	0.002	-20.556	0	0.4424	0.306	0.579	0.07	6.342	0	0.2901	0.178	0.402	0.057	5.065	0	1.1259	1.019	1.233	0.054	20.701	0	-0.1532
screening for infectious and parasitic diseases		0.0412	-0.067	0.15	0.055	0.744	1.04206	0.935195	1.16183	688	5843	969	7384	0.456868	0.65793	not_significant	0.0178929	0.340209	1.4327	1.234	1.631	0.101	14.141	0	-0.0499	-0.055	-0.045	0.002	-20.561	0	0.4434	0.307	0.58	0.07	6.355	0	0.2874	0.175	0.4	0.057	5.008	0	1.1259	1.019	1.233	0.054	20.7	0	-0.156
screening for malignant neoplasms		-0.1084	-0.222	0.005	0.058	-1.867	0.897269	0.800915	1.00501	566	5965	1128	7225	0.0618752	0.169006	not_significant	-0.0470775	1.20848	1.4001	1.199	1.601	0.103	13.643	0	-0.0488	-0.054	-0.044	0.002	-19.684	0	0.4436	0.307	0.58	0.07	6.36	0	0.2957	0.183	0.408	0.057	5.157	0	1.1255	1.019	1.232	0.054	20.693	0	-0.1436
Screening for malignant neoplasms of the skin		-0.4024	-0.661	-0.143	0.132	-3.045	0.668713	0.516335	0.866754	83	6448	231	8122	0.00232759	0.0166328	con_significant	-0.17476	2.63309	1.426	1.227	1.625	0.101	14.076	0	-0.0495	-0.054	-0.045	0.002	-20.402	0	0.443	0.306	0.58	0.07	6.348	0	0.2924	0.18	0.405	0.057	5.104	0	1.1201	1.013	1.227	0.054	20.582	0	-0.1467
screening for other diseases and disorders		0.1742	0.043	0.305	0.067	2.601	1.19029	1.04394	1.35663	482	6049	596	7757	0.00929621	0.0451823	mi_significant	0.0756541	2.03169	1.4353	1.237	1.634	0.101	14.163	0	-0.0502	-0.055	-0.045	0.002	-20.657	0	0.4492	0.312	0.586	0.07	6.434	0	0.2768	0.164	0.39	0.058	4.814	0	1.1303	1.024	1.237	0.054	20.764	0	-0.1516
Sebaceous cyst	dermatologic	0.2221	-0.011	0.455	0.119	1.866	1.2487	0.98906	1.57617	143	6388	174	8179	0.0620214	0.169056	not_significant	0.0964568	1.20746	1.4324	1.234	1.631	0.101	14.137	0	-0.05	-0.055	-0.045	0.002	-20.596	0	0.4463	0.31	0.583	0.07	6.395	0	0.2927	0.18	0.405	0.057	5.11	0	1.1288	1.022	1.236	0.054	20.741	0	-0.152
Seborrhea		1.0921	-0.442	2.626	0.783	1.395	2.98053	0.64275	13.8184	10	6521	10	8343	0.162992	0.33668	not_significant	0.474293	0.787834	1.434	1.235	1.632	0.101	14.157	0	-0.0499	-0.055	-0.045	0.002	-20.566	0	0.4427	0.306	0.579	0.07	6.347	0	0.2877	0.175	0.4	0.057	5.02	0	1.1259	1.019	1.232	0.054	20.7	0	-0.1537
Seborrheic dermatitis	dermatologic	0.3303	0.07	0.59	0.133	2.491	1.39139	1.07251	1.80399	119	6412	134	8219	0.0127315	0.0568616	not_significant	0.143447	1.89512	1.4317	1.233	1.63	0.101	14.132	0	-0.05	-0.055	-0.045	0.002	-20.609	0	0.4472	0.31	0.584	0.07	6.408	0	0.2921	0.18	0.404	0.057	5.099	0	1.1304	1.024	1.237	0.054	20.763	0	-0.1518
Seborrheic keratosis	dermatologic	0.0404	-0.132	0.213	0.088	0.459	1.04123	0.876341	1.23738	237	6294	390	7963	0.645908	0.783879	not_significant	0.0175455	0.189829	1.4358	1.237	1.635	0.101	14.146	0	-0.0499	-0.055	-0.045	0.002	-20.488	0	0.4434	0.307	0.58	0.07	6.355	0	0.2903	0.178	0.403	0.057	5.069	0	1.1263	1.02	1.233	0.054	20.704	0	-0.1538
Second degree AV block	circulatory system	2.1416	0.557	3.727	0.809	2.648	8.51305	1.74543	41.5543	10	6521	10	8343	0.00809164	0.0409748	mi_significant	0.930085	2.09196	1.4425	1.244	1.641	0.101	14.221	0	-0.0501	-0.055	-0.045	0.002	-20.628	0	0.4437	0.307	0.58	0.07	6.359	0	0.2896	0.177	0.402	0.057	5.055	0	1.1252	1.019	1.232	0.054	20.683	0	-0.154
Secondary diabetes mellitus	endocrine/metabolic	1.8449	1.024	2.666	0.419	4.406	6.32747	2.78431	14.3823	27	6504	10	8343	1.05444e-05	0.000281192	mi_significant	0.80123	4.97698	1.443	1.244	1.642	0.101	14.224	0	-0.0502	-0.055	-0.045	0.002	-20.682	0	0.4479	0.311	0.585	0.07	6.417	0	0.2915	0.179	0.404	0.057	5.085	0	1.13	1.023	1.237	0.054	20.755	0	-0.1507
Secondary hyperparathyroidism (of renal origin)	genitourinary	2.6214	1.535	3.708	0.554	4.73	13.755	4.64133	40.7722	28	6503	10	8343	2.24423e-06	8.24132e-05	mi_significant	1.13846	5.64893	1.4529	1.254	1.652	0.102	14.309	0	-0.0504	-0.055	-0.046	0.002	-20.731	0	0.4389	0.302	0.576	0.07	6.281	0	0.2842	0.172	0.397	0.057	4.956	0	1.1274	1.021	1.234	0.054	20.711	0	-0.1533
Secondary hypothyroidism	endocrine/metabolic	0.7731	-0.054	1.601	0.422	1.831	2.16647	0.947432	4.95799	14	6517	11	8342	0.0670757	0.179605	not_significant	0.335753	1.17343	1.4354	1.237	1.634	0.101	14.165	0	-0.0499	-0.055	-0.045	0.002	-20.585	0	0.444	0.307	0.581	0.07	6.365	0	0.2904	0.178	0.403	0.057	5.071	0	1.1268	1.02	1.233	0.054	20.713	0	-0.1529
Secondary malignancy of bone	neoplasms	1.4996	0.425	2.574	0.548	2.736	4.4799	1.52959	13.1182	16	6515	10	8343	0.00622065	0.0342654	mi_significant	0.651268	2.20616	1.4392	1.241	1.638	0.101	14.198	0	-0.05	-0.055	-0.045	0.002	-20.612	0	0.4419	0.305	0.579	0.07	6.334	0	0.2898	0.178	0.402	0.057	5.059	0	1.1241	1.017	1.231	0.054	20.659	0	-0.1533
Secondary malignancy of brain/spine	neoplasms	2.1406	-0.075	4.356	1.13	1.894	8.50454	0.927743	77.9447	10	6521	10	8343	0.0582356	0.162421	not_significant	0.929651	1.23481	1.4336	1.235	1.632	0.101	14.15	0	-0.0498	-0.055	-0.045	0.002	-20.555	0	0.4412	0.304	0.578	0.07	6.325	0	0.2896	0.177	0.402	0.057	5.057	0	1.1247	1.018	1.231	0.054	20.675	0	-0.1543
Secondary malignancy of lymph nodes	neoplasms	0.661	-0.094	1.416	0.385	1.717	1.93673	0.910283	4.12061	20	6511	13	8340	0.0860522	0.216688	not_significant	0.287069	1.06524	1.4363	1.238	1.635	0.101	14.172	0	-0.0499	-0.055	-0.045	0.002	-20.584	0	0.4419	0.305	0.579	0.07	6.334	0	0.2911	0.179	0.403	0.057	5.082	0	1.1244	1.018	1.231	0.054	20.669	0	-0.1533
Secondary malignancy of respiratory organs	neoplasms	0.6249	-0.29	1.54	0.467	1.339	1.86806	0.748264	4.66459	13	6518	10	8343	0.180682	0.360274	not_significant	0.271391	0.743085	1.4332	1.235	1.632	0.101	14.148	0	-0.0499	-0.055	-0.045	0.002	-20.564	0	0.4429	0.306	0.58	0.07	6.349	0	0.29	0.178	0.402	0.057	5.064	0	1.1259	1.019	1.232	0.054	20.697	0	-0.1529
Secondary malignant neoplasm	neoplasms	0.9988	0.302	1.696	0.356	2.808	2.71502	1.35256	5.4521	27	6504	14	8339	0.00498761	0.0284208	mi_significant	0.433773	2.30211	1.4399	1.241	1.638	0.101	14.209	0	-0.0501	-0.055	-0.045	0.002	-20.633	0	0.4422	0.305	0.579	0.07	6.338	0	0.2899	0.178	0.402	0.057	5.06	0	1.1241	1.017	1.231	0.054	20.658	0	-0.1528
Secondary malignant neoplasm of digestive systems	neoplasms	1.0252	-0.256	2.307	0.654	1.568	2.78765	0.774142	10.0442	10	6521	10	8343	0.116923	0.266965	not_significant	0.445239	0.932099	1.433	1.234	1.632	0.101	14.144	0	-0.0498	-0.055	-0.045	0.002	-20.553	0	0.4424	0.306	0.579	0.07	6.342	0	0.2895	0.177	0.402	0.057	5.055	0	1.1261	1.019	1.233	0.054	20.703	0	-0.1541
Secondary malignant neoplasm of liver	neoplasms	0.913	-0.059	1.885	0.496	1.841	2.49179	0.942707	6.58635	14	6517	10	8343	0.065624	0.177051	not_significant	0.396511	1.18294	1.4347	1.236	1.633	0.101	14.158	0	-0.0499	-0.055	-0.045	0.002	-20.572	0	0.4432	0.306	0.58	0.07	6.353	0	0.2907	0.178	0.403	0.057	5.076	0	1.1248	1.018	1.231	0.054	20.677	0	-0.1532
Secondary thrombocytopenia	hematopoietic	2.7136	0.646	4.781	1.055	2.573	15.0835	1.90789	119.224	14	6517	10	8343	0.0100843	0.0480867	mi_significant	1.1785	1.99636	1.4336	1.235	1.632	0.101	14.134	0	-0.0499	-0.055	-0.045	0.002	-20.556	0	0.4422	0.305	0.579	0.07	6.335	0	0.2923	0.18	0.405	0.057	5.101	0	1.1253	1.019	1.232	0.054	20.679	0	-0.151
Secondary/extrinsic cardiomyopathies	circulatory system	2.1478	0.425	3.87	0.879	2.444	8.56599	1.52959	47.9424	10	6521	10	8343	0.0145288	0.0623607	not_significant	0.932778	1.83777	1.437	1.238	1.636	0.101	14.181	0	-0.05	-0.055	-0.045	0.002	-20.602	0	0.4443	0.308	0.581	0.07	6.368	0	0.2918	0.179	0.404	0.057	5.093	0	1.1271	1.021	1.234	0.054	20.716	0	-0.1538
Senile cataract	sense organs	0.7354	0.331	1.14	0.206	3.566	2.08632	1.39236	3.12677	50	6481	59	8294	0.00036239	0.00405999	mi_significant	0.31938	3.44082	1.4692	1.27	1.669	0.102	14.42	0	-0.0509	-0.056	-0.046	0.002	-20.809	0	0.4364	0.3	0.573	0.07	6.251	0	0.2891	0.177	0.401	0.057	5.047	0	1.1279	1.021	1.235	0.054	20.727	0	-0.1541
Senile osteoporosis		2.1531	-0.16	4.466	1.18	1.824	8.61151	0.852144	87.008	10	6521	10	8343	0.06809	0.181482	not_significant	0.935079	1.16692	1.4391	1.24	1.638	0.101	14.194	0	-0.05	-0.055	-0.045	0.002	-20.603	0	0.4422	0.305	0.579	0.07	6.338	0	0.2911	0.179	0.403	0.057	5.082	0	1.1264	1.02	1.233	0.054	20.705	0	-0.1528
[truncated: 179 more rows]
[truncated: 6 more columns]

## Sheet: after_sdoh
phenotype	phecode_category	coef_has_phenotype	ci_lb_has_phenotype	ci_ub_has_phenotype	std err_has_phenotype	z_has_phenotype	odds_ratio_has_phenotype	ci_lb_or_has_phenotype	ci_ub_or_has_phenotype	Count_mi	Count_r_mi	Count_con	Count_r_con	pval_has_phenotype	pval_BH_adj_has_phenotype	significance_bh	log10_OR_has_phenotype	-log10_pval_has_phenotype	coef_Intercept	ci_lb_Intercept	ci_ub_Intercept	std err_Intercept	z_Intercept	pval_Intercept	coef_mi_or_vas_est_age	ci_lb_mi_or_vas_est_age	ci_ub_mi_or_vas_est_age	std err_mi_or_vas_est_age	z_mi_or_vas_est_age	pval_mi_or_vas_est_age	coef_location_source_value[T.1]	ci_lb_location_source_value[T.1]	ci_ub_location_source_value[T.1]	std err_location_source_value[T.1]	z_location_source_value[T.1]	pval_location_source_value[T.1]	coef_location_source_value[T.2]	ci_lb_location_source_value[T.2]	ci_ub_location_source_value[T.2]	std err_location_source_value[T.2]	z_location_source_value[T.2]	pval_location_source_value[T.2]	coef_location_source_value[T.4]	ci_lb_location_source_value[T.4]	ci_ub_location_source_value[T.4]	std err_location_source_value[T.4]	z_location_source_value[T.4]	pval_location_source_value[T.4]	coef_location_source_value[T.5]
[truncated: 1,322 more rows]
[truncated: 66 more columns]

[truncated: 2 more sheets: after_hosp, legend]
