# Supplementary material for: Leveraging Electronic Medical Records from Two Hospital Systems Identifies Male Infertility Associated Comorbidities Across Time
Source: Research Square preprint supplement (doi:10.21203/rs.3.rs-3706493/v1), 2023-12-07
Supplement: Supplementary file 16 [file fe19b1494d0e3a1da3cf12a1.xlsx]

## Sheet: Sheet1
Covariate	Vasectomy	Male Infertility	p-value
	2,464 patients	5,551 patients
estimated age, mean (sd)	46.27 (7.75)	46.92 (8.85)	0.002
estimated age at diagnosis or record, mean (sd)	41.56 (7.04)	38.57 (7.68)	<0.001
identified race, n (%)			<0.001
American Indian or Alaska Native	4 ( 0.2)	14 ( 0.3)
Asian	278 ( 11.3)	1655 ( 29.8)
Black or African American	77 ( 3.1)	151 ( 2.7)		x
Native Hawaiian or Other Pacific Islander	15 ( 0.6)	28 ( 0.5)
No matching concept	562 ( 22.8)	1487 ( 26.8)
White	1528 ( 62.0)	2216 ( 39.9)
ethnicity, n (%)			<0.001
Hispanic or Latino	314 ( 12.7)	384 ( 6.9)
No matching concept	225 ( 9.1)	668 ( 12.0)
Not Hispanic or Latino	1925 ( 78.1)	4499 ( 81.0)
number of visits before, mean (sd)	38.84 (57.65)	29.12 (55.58)	<0.001
number of visits after, mean (sd)	30.10 (55.40)	41.54 (86.33)	<0.001
months in EMR before, mean (sd)	59.01 (61.86)	36.43 (48.08)	<0.001
months in EMR after, mean (sd)	28.43 (35.61)	46.86 (47.25)	<0.001
